# Supplementary material for: BrPP5.2 Overexpression Confers Heat Shock Tolerance in Transgenic Brassica rapa through Inherent Chaperone Activity, Induced Glucosinolate Biosynthesis, and Differential Regulation of Abiotic Stress Response Genes
Source: Int J Mol Sci. 2021 Jun 16;22(12):6437. doi: 10.3390/ijms22126437 (PMC8234546; doi:10.3390/ijms22126437)
Supplement: Supplementary file 1 [file ijms-22-06437-s001.zip]

Archive with 12 entries (12 files):
- 3.DB_vs_PP5_diffspliced_DEG_GeneSymbol.exon.xlsx
- All in one for heatmap data.xlsx
- ath00966 (1).png
- Captions-Supplemental.pdf
- Chromatogram.pptx
- Gene and TFs known.xlsx
- Glucosinolate content.xlsx
- Master file.xlsx
- point data all with color with count.csv
- results 864 down DEGs.csv
- results for 652up DEGs.csv
- unique DEGs.xlsx
