# Supplementary material for: BrPP5.2 Overexpression Confers Heat Shock Tolerance in Transgenic Brassica rapa through Inherent Chaperone Activity, Induced Glucosinolate Biosynthesis, and Differential Regulation of Abiotic Stress Response Genes
Source: Int J Mol Sci. 2021 Jun 16;22(12):6437. doi: 10.3390/ijms22126437 (PMC8234546; doi:10.3390/ijms22126437)
Supplement: Supplementary file 1 [file ijms-22-06437-s001.zip › 3.DB_vs_PP5_diffspliced_DEG_GeneSymbol.exon.xlsx]

## Sheet: DB_vs_PP5_diffspliced_DEG_GeneS
Gene_ID	AT_Gene	Gene_Symbol	Gene_Info	Chr	Strand	NExons	gene.LR	P.Value	FDR
Bra021603.1	AT2G30050	-	transducin family protein / WD-40 repeat family protein	A04	+	2	1309.43	1.00893e-286	3.13465e-282
Bra030669.1	AT1G07050	-	CONSTANS-like protein-related	A08	+	4	1239.2	2.29086e-268	3.55874e-264
Bra030707.1	AT5G60390	-	elongation factor 1-alpha / EF-1-alpha	A08	-	3	1163.13	2.69199e-253	2.78792e-249
Bra034848.1	AT5G05970	NEDD1	NEDD1 (NEURAL PRECURSOR CELL EXPRESSED,DEVELOPMENTALLY DOWN-REGULATED GENE 1);nucleotide binding	A05	-	12	1044.39	5.35745e-217	4.16127e-213
Bra004718.1	AT2G42810	PAPP5,PP5	PP5.2 (PROTEIN PHOSPHATASE 5.2);phosphoprotein phosphatase/ protein binding / protein serine/threonine phosphatase	A05	+	12	1037.26	1.83613e-215	1.14094e-211
Bra027325.1	AT1G29970	RPL18AA	RPL18AA (60S RIBOSOMAL PROTEIN L18A-1);structural constituent of ribosome	A05	-	6	898.432	5.8128e-192	3.00996e-188
Bra003047.1	AT5G53550	YSL3,ATYSL3	YSL3 (YELLOW STRIPE LIKE 3);oligopeptide transporter	A10	+	9	913.043	8.67683e-192	3.85115e-188
Bra037364.1	AT4G01290	-	unknown protein	A09	-	16	890.98	3.00462e-180	1.16688e-176
Bra015880.1	AT1G74950	JAZ2,TIFY10B	TIFY10B	A07	-	5	788.477	2.40592e-169	8.3055e-166
Bra000154.1	AT2G39890	PROT1,ATPROT1	PROT1 (PROLINE TRANSPORTER 1);L-proline transmembrane transporter/ amino acid transmembrane transporter	A03	+	12	728.176	4.90333e-149	1.52342e-145
Bra000737.1	AT4G11150	TUF,emb2448,TUFF,VHA-E1	TUF (VACUOLAR ATP SYNTHASE SUBUNIT E1);proton-transporting ATPase,rotational mechanism	A03	+	8	679.417	1.88727e-142	5.33051e-139
Bra018703.1	AT1G48090	-	phosphoinositide binding	A06	+	62	840.348	1.81993e-137	4.71195e-134
Bra026326.1	-	-	-	A01	-	5	531.7	9.31257e-114	2.22563e-110
Bra034346.1	AT2G27310	-	F-box family protein	A04	-	4	522.848	5.33269e-113	1.18344e-109
Bra025371.1	AT3G29010	-	catalytic	A06	-	5	489.414	1.30468e-104	2.70235e-101
Bra037647.1	AT3G60120	BGLU27	BGLU27 (BETA GLUCOSIDASE 27);catalytic/ cation binding / hydrolase,hydrolyzing O-glycosyl compounds	A04	+	19	540.08	3.82019e-103	7.41809e-100
Bra005019.1	AT2G39730	RCA	RCA (RUBISCO ACTIVASE);ADP binding / ATP binding / enzyme regulator/ ribulose-1%2C5-bisphosphate carboxylase/oxygenase activator	A05	+	7	464.452	3.80308e-97	6.95047e-94
Bra037453.1	AT5G43470	RPP8,HRT,RCY1	RPP8 (RECOGNITION OF PERONOSPORA PARASITICA 8);nucleotide binding	A06	+	7	461.525	1.62278e-96	2.801e-93
Bra004192.1	AT5G46260	-	disease resistance protein (TIR-NBS-LRR class),putative	A07	-	7	447.072	2.09446e-93	3.42489e-90
Bra017241.1	AT2G36380	PDR6,ATPDR6	PDR6;ATPase,coupled to transmembrane movement of substances	A04	+	36	511.712	5.14442e-86	7.99161e-83
Bra037502.1	AT5G48220	-	indole-3-glycerol phosphate synthase,putative	A06	+	10	399.919	1.42578e-80	2.10941e-77
Bra037892.1	AT1G30910	-	molybdenum cofactor sulfurase family protein	A09	-	7	375.671	4.73513e-78	6.68708e-75
Bra034141.1	AT3G10740	ASD1,ARAF1,ARAF,ATASD1	ASD1 (ALPHA-L-ARABINOFURANOSIDASE 1);alpha-N-arabinofuranosidase/ hydrolase,acting on glycosyl bonds / xylan 1%2C4-beta-xylosidase	A01	+	15	406.456	5.5287e-78	7.46831e-75
Bra027294.1	AT3G14910	-	unknown protein	A05	-	14	391.53	1.37426e-75	1.77904e-72
Bra015863.1	AT1G75170	-	SEC14 cytosolic factor family protein / phosphoglyceride transfer family protein	A07	+	5	345.203	1.90428e-73	2.36656e-70
Bra000734.1	AT4G11120	-	translation elongation factor Ts (EF-Ts),putative	A03	+	10	360.98	2.84897e-72	3.40441e-69
Bra001213.1	AT3G06680	-	60S ribosomal protein L29 (RPL29B)	A03	-	3	320.115	3.0759e-70	3.53945e-67
Bra033467.1	AT3G51920	CAM9,CML9,ATCML9	CAM9 (CALMODULIN 9);calcium ion binding	A04	+	3	316.836	1.58433e-69	1.75798e-66
Bra027961.1	AT1G07440	-	tropinone reductase,putative / tropine dehydrogenase,putative	A09	-	6	317.868	1.4393e-66	1.54198e-63
Bra011596.1	AT4G35230	BSK1	BSK1 (BR-SIGNALING KINASE 1);ATP binding / binding / kinase/ protein kinase/ protein tyrosine kinase	A01	+	9	326.3	1.02916e-65	1.06583e-62
Bra019990.1	AT4G38225	-	unknown protein	A06	-	12	308.983	1.11984e-59	1.12234e-56
Bra008246.1	AT4G20095	-	unknown protein	A02	+	7	288.492	2.38715e-59	2.3177e-56
Bra026156.1	AT1G15210	PDR7,ATPDR7	PDR7 (PLEIOTROPIC DRUG RESISTANCE 7);ATPase,coupled to transmembrane movement of substances	A06	-	9	283.73	1.18981e-56	1.12019e-53
Bra015187.1	AT2G06510	ATRPA1A,RPA1A,RPA70A,ATRPA70A	RPA1A (REPLICATION PROTEIN A 1A);DNA binding / nucleic acid binding	A07	-	3	255.346	3.56728e-56	3.25976e-53
Bra004045.1	AT1G68190	-	zinc finger (B-box type) family protein	A07	-	12	281.575	6.61532e-54	5.87232e-51
Bra035233.1	AT4G11330	ATMPK5	ATMPK5 (MAP KINASE 5);MAP kinase/ kinase	A08	-	8	265.331	1.50556e-53	1.29934e-50
Bra033356.1	AT1G02890	-	AAA-type ATPase family protein	A10	+	33	333.724	6.19824e-52	5.20468e-49
Bra040484.1	AT2G46790	APRR9,PRR9,TL1	APRR9 (ARABIDOPSIS PSEUDO-RESPONSE REGULATOR 9);protein binding / transcription regulator/ two-component response regulator	A04	+	6	248.52	1.14222e-51	9.33885e-49
Bra033441.1	AT3G52310	-	ABC transporter family protein	A04	-	17	284.607	3.89285e-51	3.1012e-48
Bra018503.1	AT4G04640	ATPC1	ATPC1;enzyme regulator	A05	-	7	245.406	3.93073e-50	3.05309e-47
Bra015875.1	AT1G75010	ARC3	ARC3 (ACCUMULATION AND REPLICATION OF CHLOROPLASTS 3)	A07	-	15	271.809	8.68785e-50	6.58348e-47
Bra034154.1	AT3G10920	MSD1,MEE33,ATMSD1	MSD1 (MANGANESE SUPEROXIDE DISMUTASE 1);metal ion binding / superoxide dismutase	A01	-	6	231.209	5.88794e-48	4.35553e-45
Bra005405.1	AT2G34630	GPPS,GPS1	geranyl diphosphate synthase,putative / GPPS,putative / dimethylallyltransferase,putative / prenyl transferase,putative	A05	-	12	244.017	4.99418e-46	3.60847e-43
Bra013077.1	AT2G16390	DRD1,CHR35,DMS1	DRD1 (DEFECTIVE IN RNA-DIRECTED DNA METHYLATION 1);ATP binding / DNA binding / helicase/ nucleic acid binding	A03	+	15	247.021	1.18669e-44	8.3794e-42
Bra009876.1	AT5G26030	FC1,FC-I,ATFC-I	FC1 (ferrochelatase 1);ferrochelatase	A06	+	8	221.814	2.71825e-44	1.87674e-41
Bra037439.1	AT5G49030	OVA2	OVA2 (ovule abortion 2);ATP binding / aminoacyl-tRNA ligase/ catalytic/ isoleucine-tRNA ligase/ nucleotide binding	A06	-	22	261.238	2.25544e-43	1.52335e-40
Bra005988.1	AT5G08370	AtAGAL2	AtAGAL2 (Arabidopsis thaliana ALPHA-GALACTOSIDASE 2);alpha-galactosidase/ catalytic/ hydrolase,hydrolyzing O-glycosyl compounds	A03	-	15	234.445	4.67911e-42	3.09309e-39
Bra023671.1	AT5G44510	TAO1	TAO1 (TARGET OF AVRB OPERATION1);ATP binding / protein binding / transmembrane receptor	A02	-	10	217.468	7.13235e-42	4.61656e-39
Bra033590.1	AT4G38970	-	fructose-bisphosphate aldolase,putative	A06	+	2	181.608	2.15897e-41	1.36892e-38
Bra009004.1	AT5G10920	-	argininosuccinate lyase,putative / arginosuccinase,putative	A10	-	10	213.426	5.04168e-41	3.1328e-38
Bra019099.1	AT4G26570	ATCBL3,CBL3	ATCBL3 (ARABIDOPSIS THALIANA CALCINEURIN B-LIKE 3);calcium ion binding	A03	-	16	229.631	1.90227e-40	1.15886e-37
Bra031788.1	AT1G11890	SEC22,ATSEC22	SEC22;transporter	A09	-	8	199.45	1.50097e-39	8.96802e-37
Bra026795.1	AT1G14870	-	FUNCTIONS IN: molecular_function unknown;INVOLVED IN: response to oxidative stress;LOCATED IN: plasma membrane;EXPRESSED IN: callus;CONTAINS InterPro DOMAIN/s: EGF-type aspartate/asparagine hydroxylation conserved site (InterPro:IPR000152),Protein of unknown function Cys-rich (InterPro:IPR006461);BEST Arabidopsis thaliana protein match is: unknown protein (TAIR:AT5G35525.1);Has 492 Blast hits to …	A09	+	5	183.078	1.6275e-38	9.54051e-36
Bra025382.1	AT3G29185	-	unknown protein	A06	+	7	187.817	7.40939e-38	4.26301e-35
Bra014433.1	AT3G61470	LHCA2	LHCA2;chlorophyll binding	A04	-	4	173.815	1.91002e-37	1.07895e-34
Bra013363.1	AT4G18950	-	ankyrin protein kinase,putative	A01	+	12	194.894	8.51701e-36	4.72527e-33
Bra018705.1	AT1G48090	-	phosphoinositide binding	A06	+	63	314.839	1.63221e-35	8.89668e-33
Bra016818.1	AT1G11720	ATSS3	ATSS3 (starch synthase 3);starch synthase/ transferase,transferring glycosyl groups	A08	-	19	206.445	5.13251e-34	2.74934e-31
Bra017130.1	AT2G38290	ATAMT2,AMT2%3B1	ATAMT2 (AMMONIUM TRANSPORTER 2);ammonium transmembrane transporter/ high affinity secondary active ammonium transmembrane transporter	A04	-	5	158.786	2.66198e-33	1.40178e-30
Bra005423.1	AT2G34420	LHB1B2,LHCB1.5	LHB1B2;chlorophyll binding	A05	-	3	143.992	5.40134e-32	2.7969e-29
Bra026157.1	AT1G15210	PDR7,ATPDR7	PDR7 (PLEIOTROPIC DRUG RESISTANCE 7);ATPase,coupled to transmembrane movement of substances	A06	+	10	169.256	8.81585e-32	4.49016e-29
Bra037518.1	AT5G47940	-	unknown protein	A06	-	7	156.062	4.03806e-31	2.02352e-28
Bra016534.1	AT1G18880	-	proton-dependent oligopeptide transport (POT) family protein	A08	-	13	174.124	6.83422e-31	3.37035e-28
Bra026364.1	AT4G27270	-	quinone reductase family protein	A01	-	4	139.854	4.06337e-30	1.97257e-27
Bra019788.1	AT1G12800	-	S1 RNA-binding domain-containing protein	A06	+	13	169.924	4.94764e-30	2.3649e-27
Bra010339.1	AT4G29060	emb2726	emb2726 (embryo defective 2726);RNA binding / translation elongation factor	A08	-	3	133.695	9.29925e-30	4.37755e-27
Bra006360.1	AT5G16520	-	unknown protein	A03	-	8	152.799	1.04817e-29	4.86054e-27
Bra007442.1	AT3G59300	-	unknown protein	A09	+	11	160.262	2.86048e-29	1.30695e-26
Bra016372.1	AT1G22740	RAB7,ATRABG3B,RAB75,RABG3B	RABG3B;GTP binding	A08	-	11	158.975	5.27482e-29	2.37512e-26
Bra007284.1	AT3G56940	CRD1,CHL27,ACSF	CRD1 (COPPER RESPONSE DEFECT 1);DNA binding / magnesium-protoporphyrin IX monomethyl ester (oxidative) cyclase	A09	+	9	152.002	7.49584e-29	3.32698e-26
Bra025935.1	AT1G71390	AtRLP11	AtRLP11 (Receptor Like Protein 11);protein binding	A06	+	2	122.811	1.53409e-28	6.71305e-26
Bra001787.1	AT3G20370	-	meprin and TRAF homology domain-containing protein / MATH domain-containing protein	A03	+	15	167.537	2.15153e-28	9.28416e-26
Bra034798.1	AT3G11945	ATHST	homogentisate farnesyltransferase/ homogentisate geranylgeranyltransferase/ homogentisate solanesyltransferase	A05	+	12	157.133	5.176e-28	2.20292e-25
Bra036835.1	AT3G51130	-	unknown protein	A09	+	17	170.46	6.81547e-28	2.86148e-25
Bra016558.1	AT1G18360	-	hydrolase,alpha/beta fold family protein	A08	+	11	150.898	2.43622e-27	1.00921e-24
Bra018872.1	AT1G50730	-	unknown protein	A06	-	24	184.768	3.1127e-27	1.27248e-24
Bra023302.1	AT1G32990	PRPL11	PRPL11 (PLASTID RIBOSOMAL PROTEIN L11);structural constituent of ribosome	A09	+	4	126.076	3.78997e-27	1.52923e-24
Bra022151.1	AT5G47690	-	binding	A02	+	35	206.693	1.25143e-26	4.9847e-24
Bra021733.1	AT2G31400	-	pentatricopeptide (PPR) repeat-containing protein	A04	+	8	133.425	1.20898e-25	4.75465e-23
Bra038689.1	AT3G11940	ATRPS5A,AML1	ATRPS5A (RIBOSOMAL PROTEIN 5A);structural constituent of ribosome	A01	+	4	117.339	2.88673e-25	1.1211e-22
Bra001163.1	AT3G05680	EMB2016	EMB2016 (embryo defective 2016)	A03	-	29	184.693	5.19593e-25	1.99299e-22
Bra001392.1	AT3G11170	FAD7,FADD	FAD7 (FATTY ACID DESATURASE 7);omega-3 fatty acid desaturase	A03	-	8	128.643	1.20741e-24	4.57475e-22
Bra013997.1	AT4G13850	ATGRP2	GR-RBP2 (GLYCINE-RICH RNA-BINDING PROTEIN 2);ATP binding / RNA binding / double-stranded DNA binding / single-stranded DNA binding	A08	-	4	113.124	2.33302e-24	8.73307e-22
Bra020060.1	AT5G19760	-	dicarboxylate/tricarboxylate carrier (DTC)	A02	-	6	117.004	1.35243e-23	5.00221e-21
Bra013035.1	AT2G17030	-	F-box family protein	A03	+	5	112.622	2.00799e-23	7.33954e-21
Bra016981.1	AT2G40610	ATEXPA8,EXP8,ATEXP8,ATHEXP ALPHA 1.11	ATEXPA8 (ARABIDOPSIS THALIANA EXPANSIN A8)	A04	-	20	153.296	5.05996e-23	1.828e-20
Bra038706.1	AT3G12260	-	complex 1 family protein / LVR family protein	A01	+	2	96.7439	7.89e-23	2.81764e-20
Bra038854.1	AT3G28430	-	unknown protein	A07	+	22	155.197	1.79729e-22	6.34545e-20
Bra029859.1	AT3G10660	CPK2,ATCPK2	CPK2 (CALMODULIN-DOMAIN PROTEIN KINASE CDPK ISOFORM 2);calmodulin-dependent protein kinase/ kinase/ protein serine/threonine kinase	A05	+	13	132.616	1.84061e-22	6.42539e-20
Bra011540.1	AT4G34530	CIB1	CIB1 (CRYPTOCHROME-INTERACTING BASIC-HELIX-LOOP-HELIX 1);DNA binding / transcription factor	A01	-	6	108.506	8.47376e-22	2.92524e-19
Bra009769.1	AT5G24490	-	30S ribosomal protein,putative	A06	+	5	104.357	1.16116e-21	3.96441e-19
Bra024986.1	AT1G43170	ARP1,RPL3A	ARP1 (ARABIDOPSIS RIBOSOMAL PROTEIN 1);structural constituent of ribosome	A06	-	4	100.392	1.27975e-21	4.3218e-19
Bra025520.1	AT5G41100	-	FUNCTIONS IN: molecular_function unknown;INVOLVED IN: biological_process unknown;LOCATED IN: plasma membrane;EXPRESSED IN: 23 plant structures;EXPRESSED DURING: 13 growth stages;BEST Arabidopsis thaliana protein match is: hydroxyproline-rich glycoprotein family protein (TAIR:AT3G26910.2);Has 1257 Blast hits to 957 proteins in 161 species: Archae - 2;Bacteria - 67;Metazoa - 448;Fungi - 227;Plants …	A04	+	14	130.656	1.54804e-21	5.17161e-19
Bra017390.1	AT2G03280	-	unknown protein	A09	+	10	119.56	1.64394e-21	5.43356e-19
Bra003364.1	AT3G59100	ATGSL11,gsl11	ATGSL11 (glucan synthase-like 11);1%2C3-beta-glucan synthase/ transferase,transferring glycosyl groups	A07	+	53	210.785	5.29902e-21	1.733e-18
Bra027962.1	AT1G07440	-	tropinone reductase,putative / tropine dehydrogenase,putative	A09	-	4	96.6468	8.17283e-21	2.64502e-18
Bra028863.1	AT5G02790	-	In2-1 protein,putative	A02	+	15	128.713	1.21987e-20	3.90724e-18
Bra019689.1	AT1G14040	-	LOCATED IN: integral to membrane;EXPRESSED IN: 21 plant structures;EXPRESSED DURING: 12 growth stages;CONTAINS InterPro DOMAIN/s: SPX,N-terminal (InterPro:IPR004331),EXS,C-terminal (InterPro:IPR004342);BEST Arabidopsis thaliana protein match is: unknown protein (TAIR:AT2G03240.1);Has 732 Blast hits to 696 proteins in 144 species: Archae - 0;Bacteria - 0;Metazoa - 238;Fungi - 246;Plants - 151;Viru…	A06	+	12	120.735	1.28959e-20	4.0884e-18
Bra019975.1	AT1G09920	-	TRAF-type zinc finger-related	A06	-	9	111.877	1.56559e-20	4.91327e-18
Bra019667.1	AT1G14270	-	CAAX amino terminal protease family protein	A06	-	10	113.659	2.64044e-20	8.20357e-18
Bra003408.1	AT3G60340	-	palmitoyl protein thioesterase family protein	A07	+	18	132.616	5.86923e-20	1.80546e-17
Bra032098.1	AT2G24395	-	chaperone protein dnaJ-related	A04	+	3	87.7253	8.92672e-20	2.71906e-17
Bra026173.1	AT1G14980	CPN10	CPN10 (CHAPERONIN 10);chaperone binding	A06	-	4	90.6954	1.55305e-19	4.68462e-17
Bra014389.1	AT2G47640	-	small nuclear ribonucleoprotein D2,putative / snRNP core protein D2,putative / Sm protein D2,putative	A04	+	3	86.0583	2.05441e-19	6.13736e-17
Bra011598.1	AT5G60620	-	phospholipid/glycerol acyltransferase family protein	A01	-	12	111.782	8.06856e-19	2.38745e-16
Bra037458.1	AT5G48830	-	unknown protein	A06	-	7	96.0185	1.69654e-18	4.97262e-16
Bra001616.1	AT3G15980	-	coatomer protein complex,subunit beta 2 (beta prime),putative	A03	-	17	122.34	1.94683e-18	5.6529e-16
Bra029677.1	AT3G07770	-	ATP binding	A05	-	18	123.974	2.68787e-18	7.73236e-16
Bra029633.1	AT3G07220	-	transcriptional activator,putative	A05	-	5	87.4442	4.59478e-18	1.30968e-15
Bra006768.1	AT5G58410	-	binding / protein binding / zinc ion binding	A03	-	18	122.548	5.0345e-18	1.42197e-15
Bra029621.1	AT3G07090	-	unknown protein	A05	+	4	82.2423	1.01389e-17	2.8379e-15
Bra015954.1	AT1G73920	-	lipase family protein	A07	+	9	96.72	1.99539e-17	5.53526e-15
Bra019690.1	AT1G14040	-	LOCATED IN: integral to membrane;EXPRESSED IN: 21 plant structures;EXPRESSED DURING: 12 growth stages;CONTAINS InterPro DOMAIN/s: SPX,N-terminal (InterPro:IPR004331),EXS,C-terminal (InterPro:IPR004342);BEST Arabidopsis thaliana protein match is: unknown protein (TAIR:AT2G03240.1);Has 732 Blast hits to 696 proteins in 144 species: Archae - 0;Bacteria - 0;Metazoa - 238;Fungi - 246;Plants - 151;Viru…	A06	+	11	100.721	3.90924e-17	1.07483e-14
Bra019864.1	AT1G11330	-	S-locus lectin protein kinase family protein	A06	+	7	88.7337	5.55121e-17	1.5129e-14
Bra011597.1	AT4G35240	-	unknown protein	A01	+	4	76.6361	1.61588e-16	4.36554e-14
Bra010432.1	AT5G56190	-	WD-40 repeat family protein	A08	+	19	115.638	2.7792e-16	7.4437e-14
Bra019079.1	AT4G26990	-	unknown protein	A03	-	10	93.5624	3.13182e-16	8.31645e-14
Bra010011.1	AT5G28840	GME	GME (GDP-D-MANNOSE 3'%2C5'-EPIMERASE);GDP-mannose 3%2C5-epimerase/ NAD or NADH binding / catalytic	A06	-	6	81.4093	4.25525e-16	1.12039e-13
Bra000131.1	AT2G39390	-	60S ribosomal protein L35 (RPL35B)	A03	-	6	80.3006	7.2606e-16	1.89563e-13
Bra023297.1	AT1G32940	ATSBT3.5,SBT3.5	SBT3.5;identical protein binding / serine-type endopeptidase	A09	-	19	113.384	7.35055e-16	1.90312e-13
Bra036257.1	AT4G02570	ATCUL1,CUL1,AXR6	ATCUL1 (ARABIDOPSIS THALIANA CULLIN 1);protein binding	A09	-	28	131.912	8.96749e-16	2.30257e-13
Bra029309.1	AT5G61780	-	tudor domain-containing protein / nuclease family protein	A02	+	17	107.328	1.44118e-15	3.67016e-13
Bra017018.1	AT2G40290	-	eukaryotic translation initiation factor 2 subunit 1,putative / eIF-2A,putative / eIF-2-alpha,putative	A04	-	9	87.5301	1.4737e-15	3.72248e-13
Bra033584.1	AT4G38920	AVA-P3,ATVHA-C3	ATVHA-C3 (VACUOLAR-TYPE H(+)-ATPASE C3);ATPase	A06	-	3	67.9011	1.80083e-15	4.51208e-13
Bra014721.1	AT3G55770	-	LIM domain-containing protein	A04	-	8	83.8728	2.22936e-15	5.54113e-13
Bra011585.1	AT4G35100	PIP3,PIP3A,PIP2%3B7,SIMIP	PIP3 (PLASMA MEMBRANE INTRINSIC PROTEIN 3);water channel	A01	-	4	70.9997	2.60719e-15	6.42879e-13
Bra020549.1	AT5G25980	TGG2,BGLU37	TGG2 (GLUCOSIDE GLUCOHYDROLASE 2);hydrolase,hydrolyzing O-glycosyl compounds / thioglucosidase	A02	-	6	75.9157	5.99084e-15	1.46559e-12
Bra032392.1	AT4G21380	ARK3	ARK3 (A. THALIANA RECEPTOR KINASE 3);kinase/ transmembrane receptor protein serine/threonine kinase	A09	-	27	125.054	6.42583e-15	1.55972e-12
Bra018629.1	AT1G08380	PSAO	PSAO (photosystem I subunit O)	A06	-	3	64.6149	9.3122e-15	2.2428e-12
Bra007026.1	AT3G53760	-	tubulin family protein	A09	-	19	106.62	1.33558e-14	3.19193e-12
Bra011283.1	AT4G31570	-	unknown protein	A01	-	12	89.1085	2.49211e-14	5.91049e-12
Bra002652.1	AT5G58410	-	binding / protein binding / zinc ion binding	A10	+	17	100.71	2.54974e-14	6.00136e-12
Bra038716.1	AT3G12390	-	nascent polypeptide associated complex alpha chain protein,putative / alpha-NAC,putative	A01	-	2	57.1686	4.00015e-14	9.34441e-12
Bra008752.1	AT5G14550	-	unknown protein	A10	+	11	85.2628	4.63247e-14	1.07408e-11
Bra025017.1	AT5G46420	-	16S rRNA processing protein RimM family	A06	-	16	96.9221	4.98409e-14	1.14704e-11
Bra022618.1	AT5G52920	PKP1,PKP-BETA1,PKP2	PKP-BETA1 (PLASTIDIC PYRUVATE KINASE BETA SUBUNIT 1);pyruvate kinase	A02	+	10	81.7027	7.4119e-14	1.69324e-11
Bra026200.1	AT1G14610	TWN2,VALRS	TWN2 (TWIN 2);ATP binding / aminoacyl-tRNA ligase/ nucleotide binding / valine-tRNA ligase	A06	-	21	106.611	8.11434e-14	1.84018e-11
Bra021556.1	AT3G14420	-	(S)-2-hydroxy-acid oxidase,peroxisomal,putative / glycolate oxidase,putative / short chain alpha-hydroxy acid oxidase,putative	A01	-	11	83.3833	1.0869e-13	2.44702e-11
Bra018593.1	AT1G08910	EMB3001	EMB3001 (embryo defective 3001);zinc ion binding	A06	+	14	90.4956	1.12344e-13	2.51109e-11
Bra024819.1	AT2G02410	-	unknown protein	A06	-	10	79.1	2.43869e-13	5.41197e-11
Bra024535.1	AT1G22750	-	unknown protein	A09	-	11	81.5111	2.53671e-13	5.58958e-11
Bra037457.1	AT5G48840	PANC,PTS,ATPTS	PANC (ARABIDOPSIS HOMOLOG OF BACTERIAL PANC);pantoate-beta-alanine ligase/ protein homodimerization	A06	-	4	61.5765	2.70624e-13	5.92115e-11
Bra013661.1	AT4G22930	PYR4,DHOASE	PYR4 (PYRIMIDIN 4);dihydroorotase/ hydrolase/ hydrolase,acting on carbon-nitrogen (but not peptide) bonds,in cyclic amides	A01	+	11	81.2817	2.81403e-13	6.11393e-11
Bra004892.1	AT2G40360	-	transducin family protein / WD-40 repeat family protein	A05	-	16	92.5796	3.267e-13	7.04877e-11
Bra028845.1	AT5G03500	-	transcription coactivator	A02	-	5	64.3301	3.5611e-13	7.63033e-11
Bra011734.1	AT4G37000	ACD2,ATRCCR	ACD2 (ACCELERATED CELL DEATH 2);red chlorophyll catabolite reductase	A01	+	8	72.9627	3.71451e-13	7.90452e-11
Bra027932.1	AT1G56500	-	haloacid dehalogenase-like hydrolase family protein	A09	-	27	114.148	5.12932e-13	1.0841e-10
Bra038012.1	AT1G55680	-	WD-40 repeat family protein	A06	+	21	102.061	5.37799e-13	1.12898e-10
Bra036142.1	AT5G49460	ACLB-2	ACLB-2 (ATP CITRATE LYASE SUBUNIT B 2);ATP citrate synthase	A09	+	16	90.3221	8.63661e-13	1.80088e-10
Bra013728.1	AT4G23740	-	leucine-rich repeat transmembrane protein kinase,putative	A01	+	10	76.2038	9.1384e-13	1.89281e-10
Bra007458.1	AT2G43410	FPA	FPA;RNA binding	A09	-	5	62.3118	9.47151e-13	1.94881e-10
Bra013682.1	AT4G23290	-	protein kinase family protein	A01	-	22	102.606	9.95607e-13	2.03503e-10
Bra036137.1	AT3G04320	-	endopeptidase inhibitor	A09	-	5	62.0306	1.08536e-12	2.20399e-10
Bra026294.1	AT4G27970	SLAH2	SLAH2 (SLAC1 HOMOLOGUE 2);transporter	A01	-	8	69.9415	1.5182e-12	3.06292e-10
Bra019282.1	AT4G23650	CDPK6,CPK3	CDPK6 (CALCIUM-DEPENDENT PROTEIN KINASE 6);ATP binding / calcium ion binding / calmodulin-dependent protein kinase/ kinase/ protein kinase/ protein serine/threonine kinase	A03	-	7	67.0408	1.65102e-12	3.3094e-10
Bra032565.1	AT1G03000	PEX6	PEX6 (PEROXIN 6);ATP binding / ATPase/ nucleoside-triphosphatase/ nucleotide binding	A09	+	17	89.0421	3.75447e-12	7.47742e-10
Bra037517.1	AT5G47970	-	nitrogen regulation family protein	A06	-	11	75.2592	4.23583e-12	8.38235e-10
Bra037181.1	AT5G66210	CPK28	CPK28;ATP binding / calcium ion binding / calmodulin-dependent protein kinase/ protein kinase/ protein serine/threonine kinase	A09	-	12	77.3738	4.7403e-12	9.32129e-10
Bra003601.1	AT1G79600	-	ABC1 family protein	A07	+	18	89.8954	6.37785e-12	1.24625e-09
Bra006934.1	AT3G52570	-	ATP binding	A09	+	11	74.2167	6.75741e-12	1.31216e-09
Bra011081.1	AT4G29060	emb2726	emb2726 (embryo defective 2726);RNA binding / translation elongation factor	A01	-	16	85.3848	7.14133e-12	1.3781e-09
Bra027089.1	AT1G61370	-	S-locus lectin protein kinase family protein	A09	+	16	84.5471	1.01995e-11	1.95609e-09
Bra031830.1	AT5G67385	-	protein binding / signal transducer	A02	-	5	57.2955	1.07261e-11	2.04448e-09
Bra038690.1	AT3G11964	-	RNA binding	A01	+	41	130.755	1.44697e-11	2.74121e-09
Bra003512.1	AT2G47610	-	60S ribosomal protein L7A (RPL7aA)	A07	-	8	64.5723	1.83289e-11	3.45127e-09
Bra000307.1	AT2G43500	-	RWP-RK domain-containing protein	A03	+	6	58.9204	2.03109e-11	3.80144e-09
Bra024663.1	AT1G27070	-	5'-AMP-activated protein kinase-related	A09	-	12	73.9997	2.1077e-11	3.92121e-09
Bra015809.1	AT2G26020	PDF1.2b	PDF1.2b (plant defensin 1.2b)	A07	+	2	44.5938	2.42457e-11	4.48387e-09
Bra018877.1	AT1G50910	-	unknown protein	A06	+	10	68.5704	2.90155e-11	5.33422e-09
Bra012087.1	AT5G66631	-	FUNCTIONS IN: molecular_function unknown;INVOLVED IN: biological_process unknown;LOCATED IN: cellular_component unknown;CONTAINS InterPro DOMAIN/s: Pentatricopeptide repeat (InterPro:IPR002885);BEST Arabidopsis thaliana protein match is: pentatricopeptide (PPR) repeat-containing protein (TAIR:AT3G16010.1);Has 7784 Blast hits to 2776 proteins in 77 species: Archae - 0;Bacteria - 0;Metazoa - 9;Fung…	A07	-	8	63.1869	3.47667e-11	6.35391e-09
Bra037484.1	AT5G48480	-	unknown protein	A06	+	2	43.8005	3.63606e-11	6.60636e-09
Bra016141.1	AT3G05360	AtRLP30	AtRLP30 (Receptor Like Protein 30);kinase/ protein binding	A07	+	2	43.72	3.78877e-11	6.8438e-09
Bra022470.1	AT1G65610	ATGH9A2,KOR2	KOR2;catalytic/ hydrolase,hydrolyzing O-glycosyl compounds	A02	-	5	54.5974	3.94542e-11	7.08556e-09
Bra034200.1	AT4G03280	PETC,PGR1	PETC (PHOTOSYNTHETIC ELECTRON TRANSFER C);electron transporter,transferring electrons from cytochrome b6/f complex of photosystem II	A01	-	5	54.1972	4.78542e-11	8.54472e-09
Bra025675.1	AT1G18640	PSP	PSP (3-PHOSPHOSERINE PHOSPHATASE);phosphoserine phosphatase	A06	-	11	69.5621	5.38632e-11	9.56271e-09
Bra027791.1	AT1G63730	-	disease resistance protein (TIR-NBS-LRR class),putative	A09	+	6	56.1	7.75021e-11	1.36813e-08
Bra028565.1	AT5G10820	-	integral membrane transporter family protein	A02	+	8	61.2879	8.34604e-11	1.46499e-08
Bra011134.1	AT2G19660	-	DC1 domain-containing protein	A01	+	5	52.6759	9.96165e-11	1.7297e-08
Bra020082.1	AT5G20060	-	phospholipase/carboxylesterase family protein	A02	+	9	63.4056	9.96545e-11	1.7297e-08
Bra011557.1	AT4G34730	-	ribosome-binding factor A family protein	A01	+	3	45.9972	1.02761e-10	1.76804e-08
Bra034166.1	AT3G11130	-	clathrin heavy chain,putative	A01	+	26	98.7195	1.03001e-10	1.76804e-08
Bra000339.1	AT2G44060	-	late embryogenesis abundant family protein / LEA family protein	A03	+	11	67.8694	1.14123e-10	1.94052e-08
Bra029067.1	AT5G53460	GLT1	GLT1;glutamate synthase (NADH)	A03	-	20	86.9562	1.14299e-10	1.94052e-08
Bra009491.1	AT5G04040	SDP1	SDP1 (SUGAR-DEPENDENT1);triacylglycerol lipase	A10	-	8	60.4061	1.25242e-10	2.11475e-08
Bra020821.1	AT4G23130	CRK5,RLK6	CRK5 (CYSTEINE-RICH RLK5);kinase	A08	-	14	73.8818	1.53677e-10	2.58085e-08
Bra007657.1	AT3G62060	-	pectinacetylesterase family protein	A09	+	12	69.4193	1.575e-10	2.63084e-08
Bra029630.1	AT3G07180	-	GPI transamidase component PIG-S-related	A05	+	12	69.3892	1.59581e-10	2.65135e-08
Bra000592.1	AT5G49760	-	leucine-rich repeat family protein / protein kinase family protein	A03	-	15	75.8786	1.63214e-10	2.69728e-08
Bra007002.1	AT3G53460	CP29	CP29;RNA binding / poly(U) binding	A09	-	4	47.6717	2.50109e-10	4.11146e-08
Bra026185.1	AT1G14820	-	SEC14 cytosolic factor family protein / phosphoglyceride transfer family protein	A06	-	6	53.2515	2.98622e-10	4.8831e-08
Bra037462.1	AT5G48790	-	unknown protein	A06	-	9	60.9452	3.0402e-10	4.94533e-08
Bra010189.1	AT1G32900	-	starch synthase,putative	A06	-	13	69.8295	3.4471e-10	5.57801e-08
Bra004244.1	AT1G67690	-	metalloendopeptidase	A07	+	24	91.831	3.49607e-10	5.62794e-08
Bra029613.1	AT3G06980	-	DEAD/DEAH box helicase,putative	A05	-	8	57.9156	3.93009e-10	6.29403e-08
Bra017723.1	AT2G17560	HMGB4,NFD4,NFD04	HMGB4 (HIGH MOBILITY GROUP B 4);DNA binding / chromatin binding / structural constituent of chromatin / transcription factor	A03	-	6	52.5806	4.10076e-10	6.53366e-08
Bra027641.1	AT1G63440	HMA5	HMA5 (HEAVY METAL ATPASE 5);ATPase,coupled to transmembrane movement of ions,phosphorylative mechanism	A09	-	12	66.5956	5.39298e-10	8.54869e-08
Bra006795.1	AT5G57850	-	aminotransferase class IV family protein	A03	+	5	48.9604	5.95086e-10	9.38514e-08
Bra006907.1	AT3G52150	-	RNA recognition motif (RRM)-containing protein	A09	+	4	45.7472	6.41871e-10	1.00719e-07
Bra033578.1	AT4G38830	-	protein kinase family protein	A06	-	7	53.9661	7.49436e-10	1.17006e-07
Bra023138.1	AT2G37220	-	29 kDa ribonucleoprotein,chloroplast,putative / RNA-binding protein cp29,putative	A09	-	5	48.4446	7.62369e-10	1.1843e-07
Bra024350.1	AT1G77080	MAF1,FLM,AGL27	MAF1 (MADS AFFECTING FLOWERING 1);transcription factor	A06	+	7	53.8643	7.85676e-10	1.21444e-07
Bra015924.1	AT1G74260	PUR4	PUR4 (purine biosynthesis 4);ATP binding / catalytic/ phosphoribosylformylglycinamidine synthase	A07	-	9	58.829	7.90625e-10	1.21604e-07
Bra029059.1	AT5G53620	-	unknown protein	A03	+	13	67.7994	8.2458e-10	1.26201e-07
Bra038432.1	AT1G31710	-	copper amine oxidase,putative	A08	-	5	48.2512	8.36583e-10	1.27411e-07
Bra019760.1	AT1G12360	KEU	KEU (keule);protein transporter	A06	-	20	80.8347	1.33463e-09	2.02272e-07
Bra014655.1	AT3G57010	-	strictosidine synthase family protein	A04	+	3	40.595	1.53077e-09	2.30871e-07
Bra023553.1	AT5G16120	-	hydrolase,alpha/beta fold family protein	A02	+	12	63.8782	1.75056e-09	2.62744e-07
Bra040607.1	AT3G02870	VTC4	VTC4;3'(2')%2C5'-bisphosphate nucleotidase/ L-galactose-1-phosphate phosphatase/ inositol or phosphatidylinositol phosphatase/ inositol-1(or 4)-monophosphatase	A05	+	19	78.06	1.86823e-09	2.79057e-07
Bra006091.1	AT5G11200	-	DEAD/DEAH box helicase,putative	A03	-	12	63.4389	2.11612e-09	3.14572e-07
Bra002461.1	AT4G24280	cpHsc70-1	cpHsc70-1 (chloroplast heat shock protein 70-1);ATP binding	A10	+	8	54.0072	2.34415e-09	3.46812e-07
Bra015873.1	AT3G57260	BGL2,PR2,BG2,PR-2	BGL2 (BETA-1%2C3-GLUCANASE 2);cellulase/ glucan 1%2C3-beta-glucosidase/ hydrolase,hydrolyzing O-glycosyl compounds	A07	+	3	39.6321	2.47743e-09	3.64793e-07
Bra007645.1	AT3G61960	-	protein kinase family protein	A09	-	13	65.067	2.64963e-09	3.88309e-07
Bra026094.1	AT1G15890	-	disease resistance protein (CC-NBS-LRR class),putative	A06	+	12	62.4195	3.28336e-09	4.78924e-07
Bra018097.1	AT3G47890	-	ubiquitin thiolesterase/ zinc ion binding	A06	-	16	69.9641	4.53341e-09	6.58171e-07
Bra033364.1	AT1G03000	PEX6	PEX6 (PEROXIN 6);ATP binding / ATPase/ nucleoside-triphosphatase/ nucleotide binding	A10	+	17	71.1552	6.25715e-09	9.04202e-07
Bra023968.1	AT4G32010	HSL1,HSI2-L1,VAL2	HSL1 (HSI2-LIKE 1);transcription factor	A03	+	12	60.8251	6.51247e-09	9.36741e-07
Bra011796.1	AT4G37930	SHM1,STM,SHMT1	SHM1 (SERINE TRANSHYDROXYMETHYLTRANSFERASE 1);glycine hydroxymethyltransferase/ poly(U) binding	A01	+	15	66.7636	7.39694e-09	1.05906e-06
Bra012074.1	AT3G47840	-	pentatricopeptide (PPR) repeat-containing protein	A07	+	6	46.3313	7.77541e-09	1.10814e-06
Bra023570.1	AT5G16560	KAN,KAN1	KAN (KANADI);transcription factor	A02	-	5	43.4936	8.17352e-09	1.15956e-06
Bra008253.1	AT1G47920	-	syntaxin-related family protein	A02	-	5	43.3414	8.79008e-09	1.23722e-06
Bra037428.1	AT5G49220	-	unknown protein	A06	+	6	46.0672	8.80061e-09	1.23722e-06
Bra021263.1	AT3G17660	AGD15	AGD15 (ARF-GAP domain 15);ARF GTPase activator/ DNA binding / zinc ion binding	A01	-	9	53.2548	9.62684e-09	1.34728e-06
Bra001162.1	AT5G18370	-	disease resistance protein (TIR-NBS-LRR class),putative	A03	-	7	48.3459	1.00773e-08	1.4005e-06
Bra037443.1	AT5G48970	-	mitochondrial substrate carrier family protein	A06	-	5	43.0513	1.00972e-08	1.4005e-06
Bra003867.1	AT1G72840	-	ATP binding / protein binding / transmembrane receptor	A07	+	10	55.363	1.03856e-08	1.4341e-06
Bra035858.1	AT5G63110	HDA6,AXE1,ATHDA6,RTS1,RPD3B,SIL1	HDA6 (HISTONE DEACETYLASE 6);histone deacetylase	A09	-	6	45.4257	1.18867e-08	1.63411e-06
Bra006197.1	AT5G13420	-	transaldolase,putative	A03	-	7	47.8667	1.25633e-08	1.7195e-06
Bra007947.1	AT1G70830	MLP28	MLP28 (MLP-LIKE PROTEIN 28)	A02	-	2	32.3014	1.32019e-08	1.79899e-06
Bra022887.1	AT2G32400	GLR5,GLR3.7,ATGLR3.7	GLR5 (GLUTAMATE RECEPTOR 5);intracellular ligand-gated ion channel	A03	-	13	61.1819	1.37333e-08	1.86323e-06
Bra037798.1	AT5G64850	-	unknown protein	A09	+	5	42.1136	1.58016e-08	2.13451e-06
Bra018726.1	AT1G48420	D-CDES	D-CDES (D-CYSTEINE DESULFHYDRASE);1-aminocyclopropane-1-carboxylate deaminase/ D-cysteine desulfhydrase/ catalytic	A06	+	8	49.4892	1.81944e-08	2.44711e-06
Bra027823.1	AT5G58120	-	disease resistance protein (TIR-NBS-LRR class),putative	A09	+	3	35.3835	2.07285e-08	2.77593e-06
Bra015131.1	AT2G04040	ATDTX1,TX1	TX1;antiporter/ multidrug efflux pump/ multidrug transporter/ transporter	A07	+	11	55.8482	2.19182e-08	2.92265e-06
Bra030381.1	AT1G52500	FPG-1,ATFPG-1,ATMMH-1	ATMMH-1 (ARABIDOPSIS THALIANA MUTM HOMOLOG-1);DNA N-glycosylase	A05	-	10	53.6383	2.21147e-08	2.93624e-06
Bra034717.1	-	-	-	A05	-	3	35.1952	2.27751e-08	3.01107e-06
Bra012558.1	AT4G19110	-	protein kinase,putative	A03	-	38	104.496	2.34932e-08	3.09284e-06
Bra007627.1	AT3G61690	-	unknown protein	A09	+	16	65.781	2.49221e-08	3.26711e-06
Bra021067.1	AT4G17140	-	FUNCTIONS IN: molecular_function unknown;INVOLVED IN: biological_process unknown;EXPRESSED IN: 23 plant structures;EXPRESSED DURING: 13 growth stages;CONTAINS InterPro DOMAIN/s: Pleckstrin homology (InterPro:IPR001849);BEST Arabidopsis thaliana protein match is: phosphoinositide binding (TAIR:AT1G48090.2).	A08	-	63	142.509	2.79008e-08	3.64223e-06
Bra015701.1	AT1G76990	ACR3	ACR3;amino acid binding	A07	+	6	43.4806	2.95241e-08	3.83801e-06
Bra007454.1	AT3G59490	-	unknown protein	A09	-	6	43.2163	3.34019e-08	4.32402e-06
Bra017469.1	AT5G47720	-	acetyl-CoA C-acyltransferase,putative / 3-ketoacyl-CoA thiolase,putative	A09	-	11	54.6524	3.66707e-08	4.72748e-06
Bra001608.1	AT3G15840	PIFI	PIFI (post-illumination chlorophyll fluorescence increase)	A03	-	8	47.7585	3.96936e-08	5.09603e-06
Bra019688.1	AT1G14040	-	LOCATED IN: integral to membrane;EXPRESSED IN: 21 plant structures;EXPRESSED DURING: 12 growth stages;CONTAINS InterPro DOMAIN/s: SPX,N-terminal (InterPro:IPR004331),EXS,C-terminal (InterPro:IPR004342);BEST Arabidopsis thaliana protein match is: unknown protein (TAIR:AT2G03240.1);Has 732 Blast hits to 696 proteins in 144 species: Archae - 0;Bacteria - 0;Metazoa - 238;Fungi - 246;Plants - 151;Viru…	A06	+	11	54.4124	4.06531e-08	5.19774e-06
Bra032486.1	AT5G40170	AtRLP54	AtRLP54 (Receptor Like Protein 54);kinase/ protein binding	A09	+	5	39.9537	4.42493e-08	5.63435e-06
Bra001208.1	AT3G66652	-	fip1 motif-containing protein	A03	+	13	58.3425	4.51817e-08	5.72959e-06
Bra026796.1	AT1G14870	-	FUNCTIONS IN: molecular_function unknown;INVOLVED IN: response to oxidative stress;LOCATED IN: plasma membrane;EXPRESSED IN: callus;CONTAINS InterPro DOMAIN/s: EGF-type aspartate/asparagine hydroxylation conserved site (InterPro:IPR000152),Protein of unknown function Cys-rich (InterPro:IPR006461);BEST Arabidopsis thaliana protein match is: unknown protein (TAIR:AT5G35525.1);Has 492 Blast hits to …	A09	+	4	36.9655	4.67933e-08	5.90984e-06
Bra011962.1	AT2G28305	-	unknown protein	A07	+	7	44.8772	4.9506e-08	6.22713e-06
Bra032651.1	AT1G01790	KEA1,ATKEA1	KEA1 (K EFFLUX ANTIPORTER 1);potassium ion transmembrane transporter/ potassium:hydrogen antiporter	A09	+	19	69.5396	5.40637e-08	6.773e-06
Bra005728.1	AT5G02530	-	RNA and export factor-binding protein,putative	A03	-	7	44.4964	5.89234e-08	7.35217e-06
Bra005733.1	AT5G03340	-	cell division cycle protein 48,putative / CDC48,putative	A03	+	8	46.8491	5.97346e-08	7.42357e-06
Bra007907.1	AT1G56130	-	leucine-rich repeat family protein / protein kinase family protein	A02	-	23	76.2871	6.54579e-08	8.10244e-06
Bra006879.1	AT3G51840	ACX4,ATSCX,ATG6	ACX4 (ACYL-COA OXIDASE 4);acyl-CoA oxidase/ oxidoreductase	A09	-	13	57.4092	6.66696e-08	8.21967e-06
Bra013829.1	AT4G24740	AFC2,AME1	AFC2 (ARABIDOPSIS FUS3-COMPLEMENTING GENE 2);kinase/ protein kinase	A01	-	13	57.389	6.72325e-08	8.25631e-06
Bra006955.1	AT3G52890	KIPK	KIPK (KCBP-interacting protein kinase);kinase/ protein binding / protein kinase	A09	+	6	41.6255	7.01311e-08	8.57836e-06
Bra033335.1	AT4G02075	PIT1	PIT1 (pitchoun 1);protein binding / zinc ion binding	A10	+	6	41.3517	7.96638e-08	9.70617e-06
Bra002005.1	AT2G16920	UBC23,PFU2	UBC23 (UBIQUITIN-CONJUGATING ENZYME 23);small conjugating protein ligase/ ubiquitin-protein ligase	A10	+	21	71.5443	1.01717e-07	1.23447e-05
Bra010118.1	AT5G62740	-	band 7 family protein	A06	+	4	35.105	1.15758e-07	1.39941e-05
Bra005345.1	AT2G43590	-	chitinase,putative	A05	+	4	35.0749	1.17467e-07	1.41457e-05
Bra001729.1	AT3G19000	-	oxidoreductase,2OG-Fe(II) oxygenase family protein	A03	-	5	37.8243	1.21806e-07	1.46116e-05
Bra025454.1	AT5G41950	-	binding	A04	+	25	77.7994	1.35862e-07	1.6235e-05
Bra025392.1	AT3G29320	-	glucan phosphorylase,putative	A06	-	15	59.0246	1.73824e-07	2.06917e-05
Bra003449.1	AT2G45950	ASK20	ASK20 (ARABIDOPSIS SKP1-LIKE 20);protein binding / ubiquitin-protein ligase	A07	-	10	48.7424	1.85496e-07	2.19969e-05
Bra022493.1	AT2G44870	-	unknown protein	A02	-	4	33.8222	2.16001e-07	2.55168e-05
Bra030284.1	AT2G21660	ATGRP7,CCR2,GR-RBP7,GRP7	CCR2 (COLD,CIRCADIAN RHYTHM,AND RNA BINDING 2);RNA binding / double-stranded DNA binding / single-stranded DNA binding	A04	-	2	26.8734	2.17227e-07	2.55645e-05
Bra025681.1	AT1G18710	AtMYB47	AtMYB47 (myb domain protein 47);DNA binding / transcription factor	A06	+	2	26.8002	2.25619e-07	2.6412e-05
Bra024341.1	AT5G64960	CDKC2,CDKC%3B2	CDKC2 (Cyclin dependent kinase group C 2);kinase	A06	+	12	52.4481	2.26128e-07	2.6412e-05
Bra003451.1	AT3G61470	LHCA2	LHCA2;chlorophyll binding	A07	+	3	30.5027	2.37911e-07	2.76841e-05
Bra028839.1	AT5G03330	-	OTU-like cysteine protease family protein	A02	+	14	56.2674	2.41814e-07	2.80333e-05
Bra019766.1	AT1G12430	PAK,ARK3	ARK3 (ARMADILLO REPEAT KINESIN 3);ATP binding / binding / microtubule motor	A06	+	17	61.8401	2.55578e-07	2.95188e-05
Bra037345.1	AT3G24495	MSH7,MSH6-2,ATMSH7	MSH7 (MUTS HOMOLOG 7);ATP binding / damaged DNA binding / mismatched DNA binding	A09	+	6	38.6036	2.85353e-07	3.28257e-05
Bra024820.1	AT2G02390	ATGSTZ1,GST18	ATGSTZ1 (ARABIDOPSIS THALIANA GLUTATHIONE S-TRANSFERASE ZETA 1);catalytic/ glutathione transferase	A06	-	9	45.5745	2.86323e-07	3.28257e-05
Bra012634.1	AT4G17895	UBP20	UBP20 (UBIQUITIN-SPECIFIC PROTEASE 20);ubiquitin thiolesterase/ ubiquitin-specific protease	A03	+	15	57.6009	3.07695e-07	3.51095e-05
Bra012327.1	AT1G22430	-	alcohol dehydrogenase,putative	A07	-	13	53.7049	3.08504e-07	3.51095e-05
Bra036970.1	AT2G14850	-	unknown protein	A03	-	4	33.0487	3.14543e-07	3.56661e-05
Bra016199.1	AT1G16210	-	unknown protein	A07	+	3	29.8563	3.28692e-07	3.7135e-05
Bra025164.1	AT3G25820	ATTPS-CIN	ATTPS-CIN (terpene synthase-like sequence-1%2C8-cineole);(E)-beta-ocimene synthase/ myrcene synthase	A06	-	14	55.4315	3.39378e-07	3.82034e-05
Bra028145.1	AT5G37720	-	RNA and export factor-binding protein,putative	A04	-	6	38.2164	3.41369e-07	3.82888e-05
Bra033515.1	AT4G15810	-	GTP binding	A01	+	5	35.5772	3.53512e-07	3.95082e-05
Bra034102.1	AT3G10290	-	phosphate translocator-related	A01	+	9	44.9899	3.69618e-07	4.116e-05
Bra006033.1	AT5G09810	ACT2,ACT7	ACT7 (ACTIN 7);structural constituent of cytoskeleton	A03	+	4	32.5919	3.92655e-07	4.35693e-05
Bra006446.1	AT5G18230	-	transcription regulator NOT2/NOT3/NOT5 family protein	A03	-	16	58.7227	4.17587e-07	4.61709e-05
Bra018596.1	AT1G08845	-	structural constituent of ribosome	A06	+	9	44.3984	4.78376e-07	5.27044e-05
Bra034386.1	AT2G28080	-	glycosyltransferase family protein	A04	-	2	25.3113	4.87854e-07	5.35587e-05
Bra040624.1	AT1G66880	-	serine/threonine protein kinase family protein	A02	+	6	37.3685	5.05218e-07	5.52698e-05
Bra038687.1	AT3G13280	-	FUNCTIONS IN: molecular_function unknown;INVOLVED IN: biological_process unknown;LOCATED IN: cellular_component unknown;EXPRESSED IN: stem,sperm cell,leaf whorl,sepal,flower;EXPRESSED DURING: petal differentiation and expansion stage;CONTAINS InterPro DOMAIN/s: Protein of unknown function DUF537 (InterPro:IPR007491);BEST Arabidopsis thaliana protein match is: zinc ion binding (TAIR:AT1G01355.1);H…	A01	-	5	34.7748	5.16725e-07	5.63302e-05
Bra008101.1	AT1G73540	atnudt21	atnudt21 (Arabidopsis thaliana Nudix hydrolase homolog 21);hydrolase	A02	-	2	25.0646	5.54418e-07	6.0228e-05
Bra005037.1	AT2G39470	PPL2	PPL2 (PsbP-like protein 2);calcium ion binding	A05	-	8	41.655	6.05882e-07	6.55894e-05
Bra027800.1	AT1G63500	-	ATP binding / binding / protein kinase/ protein serine/threonine kinase/ protein tyrosine kinase	A09	+	10	45.9314	6.20116e-07	6.68972e-05
Bra037494.1	AT5G48310	-	unknown protein	A06	-	24	71.7889	6.41845e-07	6.90017e-05
Bra036703.1	AT2G20610	SUR1,HLS3,RTY,ALF1,RTY1	SUR1 (SUPERROOT 1);S-alkylthiohydroximate lyase/ carbon-sulfur lyase/ transaminase	A09	-	7	39.1576	6.66597e-07	7.14156e-05
Bra000742.1	AT4G11360	RHA1B	RHA1B;protein binding / zinc ion binding	A03	+	4	31.4007	6.99923e-07	7.47282e-05
Bra029670.1	AT3G07700	-	ABC1 family protein	A05	+	15	55.4659	7.19966e-07	7.66049e-05
Bra040276.1	AT3G06550	-	FUNCTIONS IN: molecular_function unknown;INVOLVED IN: biological_process unknown;LOCATED IN: endomembrane system;EXPRESSED IN: cultured cell;CONTAINS InterPro DOMAIN/s: Cas1p-like (InterPro:IPR012419);BEST Arabidopsis thaliana protein match is: O-acetyltransferase family protein (TAIR:AT2G34410.2);Has 185 Blast hits to 183 proteins in 57 species: Archae - 0;Bacteria - 0;Metazoa - 97;Fungi - 25;Pl…	A01	+	22	67.9181	7.54817e-07	8.00389e-05
Bra000341.1	AT2G44120	-	60S ribosomal protein L7 (RPL7C)	A03	-	3	27.8687	8.87941e-07	9.38348e-05
Bra022114.1	AT5G47210	-	nuclear RNA-binding protein,putative	A02	-	7	38.4633	9.1179e-07	9.60284e-05
Bra007651.1	AT3G62010	-	unknown protein	A09	+	19	61.9855	9.73574e-07	0.000102189
Bra033589.1	AT4G38970	-	fructose-bisphosphate aldolase,putative	A06	+	6	35.8918	9.98331e-07	0.000104435
Bra015925.1	AT1G74240	-	mitochondrial substrate carrier family protein	A07	+	9	42.6334	1.02968e-06	0.000107353
Bra019741.1	-	-	-	A06	-	2	23.8154	1.0603e-06	0.000110175
Bra034038.1	AT1G67000	-	ATP binding / kinase/ protein kinase/ protein serine/threonine kinase	A02	-	4	30.5144	1.07561e-06	0.000111394
Bra007687.1	AT3G62600	ATERDJ3B	ATERDJ3B;heat shock protein binding / unfolded protein binding	A09	-	10	44.6151	1.08689e-06	0.000112188
Bra001182.1	AT3G06080	-	unknown protein	A03	-	4	30.4065	1.13338e-06	0.000116599
Bra004225.1	AT1G67430	-	60S ribosomal protein L17 (RPL17B)	A07	+	6	35.5552	1.16566e-06	0.000119524
Bra006525.1	AT5G19940	-	plastid-lipid associated protein PAP-related / fibrillin-related	A03	+	4	30.2653	1.21363e-06	0.000124034
Bra000094.1	AT1G61000	-	FUNCTIONS IN: molecular_function unknown;INVOLVED IN: mitosis;LOCATED IN: plasma membrane;EXPRESSED IN: cultured cell;CONTAINS InterPro DOMAIN/s: Kinetochore protein Nuf2 (InterPro:IPR005549);BEST Arabidopsis thaliana protein match is: myosin heavy chain-related (TAIR:AT1G64330.1);Has 41010 Blast hits to 23184 proteins in 1264 species: Archae - 616;Bacteria - 3998;Metazoa - 20566;Fungi - 2893;Pla…	A03	+	10	44.3447	1.21927e-06	0.000124202
Bra024344.1	AT5G65000	-	nucleotide-sugar transporter family protein	A06	-	10	44.2311	1.27957e-06	0.000129918
Bra007555.1	AT3G60750	-	transketolase,putative	A09	+	7	37.6739	1.30091e-06	0.000131655
Bra003213.1	AT5G17320	HDG9	HDG9 (HOMEODOMAIN GLABROUS 9);DNA binding / sequence-specific DNA binding / transcription factor	A07	-	10	44.1758	1.30994e-06	0.000132139
Bra019850.1	AT1G11480	-	eukaryotic translation initiation factor-related	A06	-	8	39.7142	1.42766e-06	0.000143547
Bra040103.1	-	-	-	A01	-	3	26.9075	1.43589e-06	0.000143908
Bra032568.1	AT1G01790	KEA1,ATKEA1	KEA1 (K EFFLUX ANTIPORTER 1);potassium ion transmembrane transporter/ potassium:hydrogen antiporter	A09	-	9	41.8239	1.46131e-06	0.000145985
Bra003094.1	AT5G52950	-	unknown protein	A10	-	5	32.506	1.5076e-06	0.000150127
Bra019474.1	AT3G45780	PHOT1,NPH1,JK224,RPT1	PHOT1 (PHOTOTROPIN 1);FMN binding / blue light photoreceptor/ kinase/ protein binding / protein serine/threonine kinase	A06	-	19	60.5391	1.67372e-06	0.000166137
Bra039070.1	AT3G27690	LHCB2.4,LHCB2.3,LHCB2	LHCB2.3;chlorophyll binding	A09	+	2	22.8841	1.7207e-06	0.000170256
Bra026205.1	AT1G14570	-	UBX domain-containing protein	A06	+	9	41.1799	1.92922e-06	0.000190283
Bra024418.1	AT5G65760	-	serine carboxypeptidase S28 family protein	A06	+	14	51.0835	1.94107e-06	0.000190845
Bra026972.1	AT1G12410	CLPR2,NCLPP2,CLP2	CLP2 (CLP PROTEASE PROTEOLYTIC SUBUNIT 2);serine-type endopeptidase	A09	-	11	45.2224	1.98277e-06	0.00019433
Bra037581.1	AT3G18480	AtCASP	AtCASP (Arabidopsis thaliana CCAAT-displacement protein alternatively spliced product)	A01	-	25	70.2232	2.02267e-06	0.000197617
Bra033588.1	AT4G38960	-	zinc finger (B-box type) family protein	A06	-	5	31.8335	2.06899e-06	0.000201509
Bra039144.1	AT3G01120	MTO1,CGS,ATCYS1,CGS1	MTO1 (METHIONINE OVERACCUMULATION 1);cystathionine gamma-synthase	A05	-	11	45.1063	2.0808e-06	0.000202026
Bra001004.1	AT3G01540	DRH1,ATDRH1	DRH1 (DEAD BOX RNA HELICASE 1);ATP-dependent RNA helicase/ ATPase	A03	+	8	38.7847	2.14824e-06	0.000207924
Bra013863.1	AT4G25100	FSD1	FSD1 (FE SUPEROXIDE DISMUTASE 1);copper ion binding / superoxide dismutase	A01	-	7	36.3701	2.33567e-06	0.000224947
Bra021292.1	AT3G18080	BGLU44	BGLU44 (B-S GLUCOSIDASE 44);(R)-amygdalin beta-glucosidase/ 4-methylumbelliferyl-beta-D-glucopyranoside beta-glucosidase/ beta-gentiobiose beta-glucosidase/ cellobiose glucosidase/ esculin beta-glucosidase/ hydrolase,hydrolyzing O-glycosyl compounds	A01	-	12	46.7948	2.3386e-06	0.000224947
Bra026665.1	AT2G01450	ATMPK17	ATMPK17;MAP kinase	A02	+	10	42.7655	2.38003e-06	0.000227603
Bra007464.1	AT3G59630	-	diphthamide synthesis DPH2 family protein	A09	-	10	42.7647	2.38086e-06	0.000227603
Bra013059.1	AT2G16660	-	nodulin family protein	A03	-	3	25.8158	2.4784e-06	0.000236201
Bra025409.1	AT3G30180	CYP85A2,BR6OX2	BR6OX2 (BRASSINOSTEROID-6-OXIDASE 2);monooxygenase/ oxygen binding	A06	-	9	40.5737	2.50419e-06	0.000237928
Bra031427.1	AT1G61520	LHCA3	LHCA3;chlorophyll binding	A01	+	3	25.7658	2.54118e-06	0.000240707
Bra017233.1	AT2G36480	-	zinc finger (C2H2-type) family protein	A04	-	10	42.4969	2.66575e-06	0.00025174
Bra037952.1	AT5G49760	-	leucine-rich repeat family protein / protein kinase family protein	A10	-	19	58.9493	3.02149e-06	0.000284469
Bra036972.1	AT4G33920	-	protein phosphatase 2C family protein / PP2C family protein	A03	-	4	28.3011	3.14004e-06	0.000294737
Bra037230.1	AT5G28237	-	tryptophan synthase,beta subunit,putative	A09	+	7	35.6466	3.22864e-06	0.000302141
Bra021539.1	AT3G14200	-	DNAJ heat shock N-terminal domain-containing protein	A01	+	6	33.2504	3.35625e-06	0.000313139
Bra016193.1	AT1G70700	JAZ9,TIFY7	TIFY7	A07	+	6	33.1795	3.4668e-06	0.000322485
Bra014405.1	AT3G62260	-	protein phosphatase 2C,putative / PP2C,putative	A04	+	9	39.7297	3.59735e-06	0.00033363
Bra011546.1	AT4G34620	SSR16	SSR16 (SMALL SUBUNIT RIBOSOMAL PROTEIN 16);structural constituent of ribosome	A01	+	3	24.9995	3.72766e-06	0.000344686
Bra007499.1	AT3G59990	MAP2B	MAP2B (METHIONINE AMINOPEPTIDASE 2B);aminopeptidase/ metalloexopeptidase	A09	-	11	43.691	3.74012e-06	0.000344813
Bra030681.1	AT1G07420	ATSMO2,SMO2-1	SMO2-1 (STEROL 4-ALPHA-METHYL-OXIDASE 2-1);4-alpha-methyl-delta7-sterol-4alpha-methyl oxidase/ C-4 methylsterol oxidase	A08	-	10	41.6055	3.87956e-06	0.000356609
Bra028781.1	AT5G04740	-	ACT domain-containing protein	A02	-	11	43.5352	3.98857e-06	0.000365548
Bra015656.1	AT1G77760	NIA1,GNR1,NR1	NIA1 (NITRATE REDUCTASE 1);nitrate reductase	A07	-	5	30.359	4.13612e-06	0.000377956
Bra024804.1	AT2G02820	MYB88	MYB88 (myb domain protein 88);DNA binding / transcription factor	A06	+	11	43.2713	4.44709e-06	0.00040518
Bra003522.1	AT3G63080	ATGPX5,MEE42	ATGPX5 (glutathione peroxidase 5);glutathione peroxidase	A07	+	7	34.5999	5.15092e-06	0.000467936
Bra011505.1	AT4G34190	44075	SEP1 (STRESS ENHANCED PROTEIN 1);chlorophyll binding	A01	+	4	27.1775	5.40388e-06	0.000489484
Bra006967.1	AT3G53010	-	FUNCTIONS IN: molecular_function unknown;INVOLVED IN: biological_process unknown;LOCATED IN: endomembrane system;CONTAINS InterPro DOMAIN/s: Protein of unknown function DUF303,acetylesterase putative (InterPro:IPR005181);BEST Arabidopsis thaliana protein match is: hydrolase (TAIR:AT4G34215.2);Has 199 Blast hits to 199 proteins in 58 species: Archae - 0;Bacteria - 119;Metazoa - 0;Fungi - 1;Plants …	A09	-	2	20.6486	5.51781e-06	0.000498351
Bra024825.1	AT2G02230	AtPP2-B1	AtPP2-B1 (Phloem protein 2-B1);carbohydrate binding	A06	+	3	24.1515	5.69592e-06	0.000512946
Bra025380.1	AT3G29170	-	unknown protein	A06	+	2	20.5441	5.82736e-06	0.000523266
Bra026222.1	AT1G14400	UBC1,ATUBC1	UBC1 (UBIQUITIN CARRIER PROTEIN 1);ubiquitin-protein ligase	A06	-	5	29.5274	6.1074e-06	0.000546832
Bra019692.1	AT1G14000	VIK	VIK (VH1-INTERACTING KINASE);ATP binding / protein kinase/ protein serine/threonine/tyrosine kinase	A06	+	12	44.3168	6.39562e-06	0.000570992
Bra003526.1	AT3G45140	LOX2,ATLOX2	LOX2 (LIPOXYGENASE 2);lipoxygenase	A07	-	7	34.0804	6.49107e-06	0.000577854
Bra000308.1	AT3G59580	-	RWP-RK domain-containing protein	A03	+	9	38.2915	6.64995e-06	0.000590307
Bra026194.1	AT1G14710	-	hydroxyproline-rich glycoprotein family protein	A06	-	8	36.1909	6.67196e-06	0.000590573
Bra019866.1	AT1G11330	-	S-locus lectin protein kinase family protein	A06	+	7	33.9788	6.79107e-06	0.000599409
Bra000632.1	AT4G07390	-	PQ-loop repeat family protein / transmembrane family protein	A03	+	8	36.1309	6.8483e-06	0.000602747
Bra010229.1	AT4G31600	-	UDP-glucuronic acid/UDP-N-acetylgalactosamine transporter-related	A08	+	8	36.1043	6.92818e-06	0.000608055
Bra001525.1	AT3G13870	RHD3	RHD3 (ROOT HAIR DEFECTIVE 3);GTP binding	A03	-	23	63.206	7.40493e-06	0.000648067
Bra003679.1	AT1G77540	-	H3/H4 histone acetyltransferase	A07	+	2	20.0331	7.61145e-06	0.00066427
Bra000338.1	AT2G44040	-	dihydrodipicolinate reductase family protein	A03	-	9	37.7254	8.46036e-06	0.000736289
Bra034573.1	AT4G33580	ATBCA5,BCA5	carbonic anhydrase family protein / carbonate dehydratase family protein	A08	-	11	41.6462	8.66719e-06	0.000750664
Bra005662.1	AT5G01930	-	(1-4)-beta-mannan endohydrolase,putative	A03	+	10	39.6825	8.67387e-06	0.000750664
Bra021450.1	AT2G47940	DEGP2	DEGP2;serine-type endopeptidase/ serine-type peptidase	A01	+	19	56.0659	8.70139e-06	0.000750954
Bra019286.1	AT3G15980	-	coatomer protein complex,subunit beta 2 (beta prime),putative	A03	+	21	59.3845	8.86448e-06	0.00076291
Bra028456.1	AT5G40380	-	protein kinase family protein	A02	+	9	37.5285	9.19858e-06	0.000789477
Bra039011.1	AT2G19690	PLA2-BETA	PLA2-BETA (PHOSPHOLIPASE A2-BETA);calcium ion binding / phospholipase A2	A07	-	5	28.6393	9.2535e-06	0.000792003
Bra026756.1	AT1G15570	CYCA2%3B3	CYCA2%3B3 (CYCLIN A2%3B3);cyclin-dependent protein kinase regulator	A09	-	7	33.1805	9.67959e-06	0.000826195
Bra007564.1	AT3G60810	-	unknown protein	A09	+	7	33.0912	1.00707e-05	0.000857224
Bra000788.1	AT4G04320	-	malonyl-CoA decarboxylase family protein	A03	+	17	52.1437	1.03839e-05	0.000881469
Bra006014.1	AT5G08680	-	ATP synthase beta chain,mitochondrial,putative	A03	+	14	46.7133	1.08004e-05	0.000914324
Bra024662.1	AT1G27100	-	FUNCTIONS IN: molecular_function unknown;INVOLVED IN: biological_process unknown;LOCATED IN: vacuole;EXPRESSED IN: 23 plant structures;EXPRESSED DURING: 13 growth stages;CONTAINS InterPro DOMAIN/s: Protein of unknown function DUF569 (InterPro:IPR007679),Actin_cross-linking (InterPro:IPR008999);BEST Arabidopsis thaliana protein match is: unknown protein (TAIR:AT1G69900.1);Has 184 Blast hits to 118…	A09	-	2	19.2677	1.13613e-05	0.000958299
Bra038795.1	AT4G20890	TUB9	TUB9;GTP binding / GTPase/ structural molecule	A03	+	3	22.767	1.13815e-05	0.000958299
Bra003947.1	AT1G70700	JAZ9,TIFY7	TIFY7	A07	-	5	28.068	1.20834e-05	0.00101464
Bra011293.1	AT4G31720	TAFII15,STG1	TAFII15 (TBP-ASSOCIATED FACTOR II 15);RNA polymerase II transcription factor/ transcription factor	A01	+	6	30.2902	1.29299e-05	0.0010828
Bra033604.1	AT4G39210	APL3	APL3;glucose-1-phosphate adenylyltransferase	A06	-	13	44.3599	1.32589e-05	0.00110737
Bra030642.1	AT1G06220	MEE5	MEE5 (MATERNAL EFFECT EMBRYO ARREST 5);GTP binding / GTPase/ translation elongation factor/ translation factor,nucleic acid binding	A08	-	10	38.6378	1.3388e-05	0.00111515
Bra026142.1	AT1G15350	-	unknown protein	A06	-	5	27.8345	1.3474e-05	0.00111932
Bra007197.1	AT4G13810	AtRLP47	AtRLP47 (Receptor Like Protein 47);protein binding	A09	-	3	22.3419	1.40774e-05	0.00116632
Bra015850.1	AT1G75350	emb2184	emb2184 (embryo defective 2184);structural constituent of ribosome	A07	+	2	18.8394	1.42199e-05	0.00117242
Bra012524.1	AT4G19970	-	unknown protein	A03	+	4	25.1701	1.42264e-05	0.00117242
Bra002791.1	AT5G56790	-	protein kinase family protein	A10	+	18	52.8656	1.50057e-05	0.00123337
Bra037464.1	AT5G48730	-	pentatricopeptide (PPR) repeat-containing protein	A06	+	2	18.6394	1.57924e-05	0.0012946
Bra036807.1	AT5G67385	-	protein binding / signal transducer	A09	-	3	22.089	1.59747e-05	0.00130432
Bra026152.1	AT1G15240	-	phox (PX) domain-containing protein	A06	+	14	45.6983	1.59949e-05	0.00130432
Bra013951.1	AT4G26110	NAP1%3B1,ATNAP1%3B1	NAP1%3B1 (NUCLEOSOME ASSEMBLY PROTEIN1%3B1);DNA binding	A01	+	12	41.9685	1.64015e-05	0.00133398
Bra004950.1	AT2G45960	PIP1B,TMP-A,ATHH2,PIP1%3B2	PIP1B (NAMED PLASMA MEMBRANE INTRINSIC PROTEIN 1B);water channel	A05	+	4	24.6731	1.80718e-05	0.00146456
Bra008307.1	AT1G77420	-	hydrolase,alpha/beta fold family protein	A02	+	6	29.5477	1.81014e-05	0.00146456
Bra002426.1	AT5G22740	ATCSLA02,CSLA02,ATCSLA2	ATCSLA02;mannan synthase/ transferase,transferring glycosyl groups	A10	+	13	43.4422	1.89999e-05	0.00153327
Bra011319.1	AT4G32060	-	calcium-binding EF hand family protein	A01	-	7	31.616	1.93293e-05	0.00155581
Bra019857.1	AT1G80740	CMT1,DMT4	CMT1 (CHROMOMETHYLASE 1);DNA binding / chromatin binding	A06	-	17	50.4142	1.9689e-05	0.00158066
Bra039001.1	AT1G12410	CLPR2,NCLPP2,CLP2	CLP2 (CLP PROTEASE PROTEOLYTIC SUBUNIT 2);serine-type endopeptidase	A07	+	2	18.1788	2.01102e-05	0.00161032
Bra014524.1	AT3G59820	-	calcium-binding mitochondrial protein-related	A04	+	14	45.0061	2.08784e-05	0.00166753
Bra039412.1	AT3G58650	-	unknown protein	A05	-	14	44.9743	2.11347e-05	0.00168368
Bra024631.1	AT1G24030	-	protein kinase family protein	A09	-	7	31.3545	2.1689e-05	0.00172341
Bra011551.1	AT4G34670	-	40S ribosomal protein S3A (RPS3aB)	A01	-	7	31.3396	2.18313e-05	0.0017303
Bra017062.1	AT2G39580	-	unknown protein	A04	+	11	39.3558	2.19927e-05	0.00173865
Bra018842.1	AT1G50320	ATHX,ATX	ATHX;enzyme activator	A06	+	2	17.9716	2.2422e-05	0.00176809
Bra039099.1	AT3G26980	MUB4	MUB4 (MEMBRANE-ANCHORED UBIQUITIN-FOLD PROTEIN 4 PRECURSOR)	A09	+	3	21.4024	2.25178e-05	0.00177115
Bra011650.1	AT4G35940	-	unknown protein	A01	-	3	21.3907	2.26502e-05	0.00177707
Bra001934.1	AT3G23990	HSP60,HSP60-3B	HSP60 (HEAT SHOCK PROTEIN 60);ATP binding	A03	-	17	49.8991	2.3789e-05	0.00186171
Bra017914.1	AT1G21440	-	mutase family protein	A06	-	7	31.1301	2.39394e-05	0.00186878
Bra037476.1	AT5G48580	FKBP15-2	FKBP15-2;FK506 binding / peptidyl-prolyl cis-trans isomerase	A06	-	6	28.9055	2.41986e-05	0.00188428
Bra018155.1	AT5G15150	ATHB-3,HAT7,ATHB3	ATHB-3 (ARABIDOPSIS THALIANA HOMEOBOX 3);DNA binding / sequence-specific DNA binding / transcription factor	A06	+	4	24.0007	2.4971e-05	0.00193956
Bra035123.1	AT1G79520	-	cation efflux family protein	A07	-	7	30.9863	2.55028e-05	0.00197504
Bra013684.1	AT4G23290	-	protein kinase family protein	A01	-	14	44.479	2.5555e-05	0.00197504
Bra025321.1	AT3G28100	-	nodulin MtN21 family protein	A06	-	7	30.9525	2.58845e-05	0.00199555
Bra012492.1	AT1G25230	-	purple acid phosphatase family protein	A07	-	8	33.0202	2.62479e-05	0.00201855
Bra036763.1	AT1G35680	-	50S ribosomal protein L21,chloroplast / CL21 (RPL21)	A08	-	5	26.3611	2.67575e-05	0.00205267
Bra014117.1	AT1G48230	-	phosphate translocator-related	A08	-	4	23.7633	2.79895e-05	0.00214189
Bra011939.1	AT2G28550	RAP2.7,TOE1	RAP2.7 (RELATED TO AP2.7);DNA binding / transcription factor	A07	-	10	36.801	2.85592e-05	0.00218011
Bra005229.1	AT2G36970	-	UDP-glucoronosyl/UDP-glucosyl transferase family protein	A05	-	2	17.4665	2.92422e-05	0.00222678
Bra010203.1	AT1G33470	-	RNA recognition motif (RRM)-containing protein	A06	+	5	26.1081	3.0096e-05	0.00228619
Bra008697.1	AT3G58220	-	FUNCTIONS IN: molecular_function unknown;INVOLVED IN: biological_process unknown;LOCATED IN: cellular_component unknown;CONTAINS InterPro DOMAIN/s: TRAF-like (InterPro:IPR008974),MATH (InterPro:IPR002083);BEST Arabidopsis thaliana protein match is: meprin and TRAF homology domain-containing protein / MATH domain-containing protein (TAIR:AT3G58210.1);Has 9980 Blast hits to 5896 proteins in 419 spe…	A10	-	2	17.403	3.02348e-05	0.00229114
Bra039945.1	AT2G47130	-	short-chain dehydrogenase/reductase (SDR) family protein	A09	+	2	17.3533	3.10351e-05	0.00234606
Bra000840.1	AT4G03210	XTH9	XTH9 (XYLOGLUCAN ENDOTRANSGLUCOSYLASE/HYDROLASE 9);hydrolase,acting on glycosyl bonds / xyloglucan:xyloglucosyl transferase	A03	-	4	23.4666	3.2278e-05	0.00243409
Bra006954.1	AT3G52880	ATMDAR1	monodehydroascorbate reductase,putative	A09	-	10	36.4575	3.28793e-05	0.00247343
Bra023427.1	AT5G13650	-	elongation factor family protein	A02	+	16	47.229	3.38359e-05	0.00253924
Bra007548.1	AT3G60620	-	phosphatidate cytidylyltransferase family protein	A09	+	4	23.3095	3.48066e-05	0.0026058
Bra008137.1	AT1G74190	AtRLP15	AtRLP15 (Receptor Like Protein 15);protein binding	A02	-	4	23.2779	3.534e-05	0.00263937
Bra006136.1	AT5G11980	-	conserved oligomeric Golgi complex component-related / COG complex component-related	A03	-	11	38.1343	3.59626e-05	0.00267943
Bra032557.1	AT1G03090	MCCA	MCCA;methylcrotonoyl-CoA carboxylase	A09	-	24	60.1403	3.6462e-05	0.00271014
Bra028165.1	AT5G38210	-	serine/threonine protein kinase family protein	A04	+	6	27.9547	3.7149e-05	0.00275461
Bra028434.1	AT5G39500	-	pattern formation protein,putative	A02	+	7	30.1155	3.73693e-05	0.00276435
Bra033168.1	AT4G10770	ATOPT7,OPT7	OPT7 (OLIGOPEPTIDE TRANSPORTER 7);oligopeptide transporter	A02	+	10	36.077	3.84177e-05	0.00283515
Bra002955.1	AT5G54800	GPT1	GPT1;antiporter/ glucose-6-phosphate transmembrane transporter	A10	+	5	25.5666	3.86935e-05	0.00284874
Bra017347.1	AT3G25805	-	unknown protein	A09	+	5	25.5332	3.92968e-05	0.00288632
Bra007572.1	AT3G61110	ARS27A	ARS27A (ARABIDOPSIS RIBOSOMAL PROTEIN S27);structural constituent of ribosome	A09	-	4	23.0259	3.98834e-05	0.0029225
Bra022517.1	AT4G24920	-	protein transport protein SEC61 gamma subunit,putative	A02	+	2	16.8549	4.03486e-05	0.00294963
Bra019410.1	AT5G11250	-	disease resistance protein (TIR-NBS-LRR class),putative	A03	-	4	22.8611	4.3166e-05	0.00314818
Bra016649.1	AT1G15860	-	INVOLVED IN: biological_process unknown;EXPRESSED IN: 23 plant structures;EXPRESSED DURING: 13 growth stages;CONTAINS InterPro DOMAIN/s: Defective in cullin neddylation (InterPro:IPR014764),Protein of unknown function DUF298 (InterPro:IPR005176);BEST Arabidopsis thaliana protein match is: unknown protein (TAIR:AT3G12760.1);Has 576 Blast hits to 576 proteins in 121 species: Archae - 0;Bacteria - 0…	A08	-	18	49.8639	4.43448e-05	0.00322657
Bra028523.1	AT5G42050	-	FUNCTIONS IN: molecular_function unknown;EXPRESSED IN: 22 plant structures;EXPRESSED DURING: 13 growth stages;CONTAINS InterPro DOMAIN/s: Development and cell death domain (InterPro:IPR013989),Kelch related (InterPro:IPR013089);BEST Arabidopsis thaliana protein match is: unknown protein (TAIR:AT3G27090.1);Has 5084 Blast hits to 2870 proteins in 85 species: Archae - 0;Bacteria - 24;Metazoa - 270;F…	A02	+	2	16.5807	4.66226e-05	0.00338438
Bra019678.1	AT1G14120	-	2-oxoglutarate-dependent dioxygenase,putative	A06	-	3	19.9265	4.71004e-05	0.00340683
Bra030161.1	AT1G29720	-	protein kinase family protein	A07	+	11	37.4576	4.7151e-05	0.00340683
Bra039965.1	AT2G29140	APUM3	APUM3 (Arabidopsis Pumilio 3);RNA binding / binding	A04	-	10	35.4376	4.98687e-05	0.00359483
Bra038715.1	AT3G12370	-	ribosomal protein L10 family protein	A01	+	2	16.4474	5.00187e-05	0.00359729
Bra040361.1	AT3G07100	-	protein transport protein Sec24,putative	A01	+	12	39.1331	5.02853e-05	0.00360811
Bra031624.1	AT1G08380	PSAO	PSAO (photosystem I subunit O)	A09	+	3	19.7633	5.11028e-05	0.00365833
Bra007708.1	AT2G26350	PEX10,ATPEX10	PEX10;protein binding / zinc ion binding	A09	-	8	31.4335	5.17083e-05	0.00369316
Bra029628.1	AT3G07160	ATGSL10,gsl10	ATGSL10 (glucan synthase-like 10);1%2C3-beta-glucan synthase	A05	+	51	98.2964	5.43811e-05	0.00387515
Bra020107.1	AT5G20510	AL5	AL5 (ALFIN-LIKE 5);DNA binding / methylated histone residue binding	A02	-	5	24.6862	5.81736e-05	0.00413592
Bra016548.1	AT1G18640	PSP	PSP (3-PHOSPHOSERINE PHOSPHATASE);phosphoserine phosphatase	A08	+	10	34.934	6.1201e-05	0.00434122
Bra011504.1	AT3G42050	-	vacuolar ATP synthase subunit H family protein	A01	-	11	36.7686	6.20527e-05	0.00439161
Bra039474.1	AT3G04980	-	DNAJ heat shock N-terminal domain-containing protein	A05	+	4	22.0609	6.33556e-05	0.00447363
Bra001454.1	AT3G12500	ATHCHIB,PR3,PR-3,CHI-B,B-CHI	ATHCHIB (ARABIDOPSIS THALIANA BASIC CHITINASE);chitinase	A03	-	5	24.4596	6.45991e-05	0.00455109
Bra001415.1	AT3G11630	-	2-cys peroxiredoxin,chloroplast (BAS1)	A03	+	8	30.9032	6.47834e-05	0.0045517
Bra010735.1	AT4G38630	RPN10,MCB1,ATMCB1,MBP1	RPN10 (REGULATORY PARTICLE NON-ATPASE 10);peptide receptor	A08	+	10	34.7894	6.49008e-05	0.0045517
Bra012058.1	AT5G66210	CPK28	CPK28;ATP binding / calcium ion binding / calmodulin-dependent protein kinase/ protein kinase/ protein serine/threonine kinase	A07	+	11	36.3939	7.20121e-05	0.00503906
Bra008055.1	AT5G17680	-	disease resistance protein (TIR-NBS-LRR class),putative	A02	+	2	15.7229	7.33309e-05	0.00511981
Bra010717.1	AT4G38970	-	fructose-bisphosphate aldolase,putative	A08	+	6	26.429	7.36641e-05	0.00513155
Bra016378.1	AT4G22110	-	alcohol dehydrogenase,putative	A08	-	6	26.4116	7.4241e-05	0.00516017
Bra015520.1	AT1G06680	PSBP-1,OEE2,PSII-P,OE23	PSBP-1 (PHOTOSYSTEM II SUBUNIT P-1);poly(U) binding	A10	-	4	21.7124	7.48667e-05	0.00519204
Bra021853.1	AT2G33450	-	50S ribosomal protein L28,chloroplast (CL28)	A04	+	2	15.6654	7.5595e-05	0.00523087
Bra016481.1	AT1G20020	ATLFNR2,FNR2	FNR2 (FERREDOXIN-NADP(+)-OXIDOREDUCTASE 2);NADPH dehydrogenase/ oxidoreductase/ poly(U) binding	A08	-	9	32.4561	7.71519e-05	0.00532674
Bra007840.1	AT2G24650	-	DNA binding / transcription factor	A09	-	12	38.0125	7.78558e-05	0.00536342
Bra029188.1	AT5G51110	-	4-alpha-hydroxytetrahydrobiopterin dehydratase	A03	+	3	18.7234	8.59544e-05	0.00589981
Bra015215.1	AT4G38470	-	protein kinase family protein	A10	+	16	44.6794	8.60218e-05	0.00589981
Bra005099.1	AT2G38540	LP1,LTP1,ATLTP1	LP1;calmodulin binding	A05	-	2	15.4001	8.69829e-05	0.00595258
Bra026143.1	AT1G15330	-	CBS domain-containing protein	A06	+	3	18.6718	8.82023e-05	0.00602276
Bra007201.1	AT3G08510	-	ATPLC2 (PHOSPHOLIPASE C 2);phospholipase C	A09	+	9	32.0721	9.04137e-05	0.00616022
Bra005134.1	AT2G38140	PSRP4	PSRP4 (PLASTID-SPECIFIC RIBOSOMAL PROTEIN 4);structural constituent of ribosome	A05	-	3	18.509	9.56821e-05	0.00650492
Bra022605.1	AT5G52760	-	heavy-metal-associated domain-containing protein	A02	-	2	15.1865	9.73955e-05	0.0065874
Bra007034.1	AT3G53900	-	uracil phosphoribosyltransferase,putative / UMP pyrophosphorylase,putative / UPRTase,putative	A09	-	12	37.4351	9.73983e-05	0.0065874
Bra009002.1	AT5G10940	-	transducin family protein / WD-40 repeat family protein	A10	+	19	49.2617	9.75314e-05	0.0065874
Bra030790.1	AT1G57720	-	elongation factor 1B-gamma,putative / eEF-1B gamma,putative	A08	-	10	33.7649	9.82043e-05	0.00661846
Bra001738.1	AT3G19170	ATPREP1,ATZNMP	ATPREP1 (PRESEQUENCE PROTEASE 1);metalloendopeptidase	A03	-	18	47.5889	9.92136e-05	0.00667201
Bra029711.1	AT3G08690	UBC11,ATUBC11	UBC11 (UBIQUITIN-CONJUGATING ENZYME 11);ubiquitin-protein ligase	A05	-	8	29.7671	0.000104766	0.00703019
Bra023636.1	AT5G17770	ATCBR,CBR1	ATCBR (ARABIDOPSIS THALIANA NADH:CYTOCHROME B5 REDUCTASE 1);cytochrome-b5 reductase	A02	-	8	29.7471	0.000105656	0.00707167
Bra031167.1	AT2G21170	TIM	TIM (TRIOSEPHOSPHATE ISOMERASE);catalytic/ triose-phosphate isomerase	A09	+	9	31.6898	0.00010584	0.00707167
Bra029100.1	AT5G53045	-	FUNCTIONS IN: molecular_function unknown;INVOLVED IN: biological_process unknown;LOCATED IN: cellular_component unknown;CONTAINS InterPro DOMAIN/s: Transcription factor Pcc1 (InterPro:IPR015419);Has 78 Blast hits to 78 proteins in 41 species: Archae - 0;Bacteria - 0;Metazoa - 33;Fungi - 21;Plants - 19;Viruses - 0;Other Eukaryotes - 5 (source: NCBI BLink).	A03	+	4	20.9428	0.000108195	0.00721357
Bra010917.1	AT1G27770	ACA1,PEA1	ACA1 (AUTO-INHIBITED CA2+-ATPASE 1);calcium channel/ calcium-transporting ATPase/ calmodulin binding	A08	+	7	27.6364	0.000109992	0.00731244
Bra026292.1	-	-	-	A01	-	3	18.2274	0.000110149	0.00731244
Bra004546.1	AT2G46330	AGP16,ATAGP16	AGP16 (ARABINOGALACTAN PROTEIN 16)	A05	+	2	14.8797	0.000114589	0.00759096
Bra038612.1	AT5G63160	BT1	BT1 (BTB AND TAZ DOMAIN PROTEIN 1);protein binding / transcription regulator	A06	-	5	23.2101	0.000114959	0.0075993
Bra026148.1	AT1G15280	-	glycine-rich protein	A06	+	7	27.5048	0.000116438	0.00768073
Bra019797.1	AT1G12900	GAPA-2	GAPA-2 (GLYCERALDEHYDE 3-PHOSPHATE DEHYDROGENASE A SUBUNIT 2);NAD or NADH binding / binding / catalytic/ glyceraldehyde-3-phosphate dehydrogenase (phosphorylating)/ glyceraldehyde-3-phosphate dehydrogenase	A06	+	5	23.1375	0.000118862	0.00782398
Bra008524.1	AT4G00560	-	methionine adenosyltransferase regulatory beta subunit-related	A02	-	6	25.3065	0.000121574	0.00798557
Bra028944.1	AT5G56160	-	transporter	A03	-	13	38.5545	0.000124573	0.00816163
Bra025067.1	AT5G45610	-	unknown protein	A06	+	11	35.0017	0.00012478	0.00816163
Bra033282.1	AT1G01140	CIPK9,SnRK3.12,PKS6	CIPK9 (CBL-INTERACTING PROTEIN KINASE 9);ATP binding / kinase/ protein kinase/ protein serine/threonine kinase	A10	-	16	43.6041	0.000126801	0.00827644
Bra026155.1	AT1G15215	-	FUNCTIONS IN: molecular_function unknown;INVOLVED IN: biological_process unknown;LOCATED IN: cellular_component unknown;BEST Arabidopsis thaliana protein match is: sequence-specific DNA binding / transcription factor (TAIR:AT3G18380.1);Has 41 Blast hits to 40 proteins in 9 species: Archae - 0;Bacteria - 0;Metazoa - 0;Fungi - 0;Plants - 41;Viruses - 0;Other Eukaryotes - 0 (source: NCBI BLink).	A06	+	9	31.2124	0.000128781	0.00838807
Bra004932.1	AT2G45740	PEX11D	PEX11D	A05	+	7	27.1827	0.000133828	0.00869855
Bra027485.1	AT1G04410	-	malate dehydrogenase,cytosolic,putative	A09	-	6	25.0818	0.000134355	0.00871459
Bra024922.1	AT5G47690	-	binding	A06	-	33	69.5326	0.000135872	0.00879458
Bra026186.1	AT1G14810	-	semialdehyde dehydrogenase family protein	A06	-	7	27.1202	0.000137491	0.00888087
Bra001788.1	AT3G20390	-	endoribonuclease L-PSP family protein	A03	-	6	24.9963	0.000139561	0.00899589
Bra028967.1	AT5G55630	KCO1,TPK1,ATKCO1,ATTPK1	ATKCO1;calcium-activated potassium channel/ ion channel/ outward rectifier potassium channel	A03	-	2	14.4988	0.000140251	0.00902168
Bra006384.1	AT5G17120	-	FUNCTIONS IN: molecular_function unknown;INVOLVED IN: biological_process unknown;LOCATED IN: cellular_component unknown;CONTAINS InterPro DOMAIN/s: Cystatin-related,plant (InterPro:IPR006525);BEST Arabidopsis thaliana protein match is: unknown protein (TAIR:AT5G17150.1);Has 47 Blast hits to 45 proteins in 6 species: Archae - 0;Bacteria - 0;Metazoa - 11;Fungi - 3;Plants - 32;Viruses - 0;Other Euka…	A03	-	3	17.7284	0.000141359	0.00907413
Bra015307.1	AT1G04380	-	2-oxoglutarate-dependent dioxygenase,putative	A10	-	3	17.7203	0.000141934	0.00909228
Bra024886.1	AT2G01450	ATMPK17	ATMPK17;MAP kinase	A06	+	9	30.9594	0.000142858	0.00913263
Bra011593.1	AT4G35220	-	cyclase family protein	A01	-	6	24.9314	0.000143645	0.0091641
Bra016284.1	AT1G35350	-	LOCATED IN: integral to membrane;EXPRESSED IN: 18 plant structures;EXPRESSED DURING: 9 growth stages;CONTAINS InterPro DOMAIN/s: EXS,C-terminal (InterPro:IPR004342),SPX,N-terminal (InterPro:IPR004331);BEST Arabidopsis thaliana protein match is: EXS family protein / ERD1/XPR1/SYG1 family protein (TAIR:AT1G26730.1);Has 734 Blast hits to 697 proteins in 158 species: Archae - 0;Bacteria - 21;Metazoa …	A08	+	11	34.5896	0.000146682	0.00932164
Bra016476.1	AT1G20110	-	zinc finger (FYVE type) family protein	A08	-	10	32.7653	0.000146715	0.00932164
Bra029137.1	AT5G52120	AtPP2-A14	AtPP2-A14 (Phloem protein 2-A14);carbohydrate binding	A03	+	3	17.5432	0.000155072	0.00983252
Bra039113.1	AT3G01500	CA1	CA1 (CARBONIC ANHYDRASE 1);carbonate dehydratase/ zinc ion binding	A05	-	9	30.7053	0.000158522	0.0100308
Bra026154.1	AT1G15220	ATCCMH,CCMH	CCMH;oxidoreductase	A06	-	4	20.0877	0.000162789	0.0102798
Bra032705.1	AT4G13410	ATCSLA15,CSLA15	ATCSLA15;cellulose synthase/ transferase,transferring glycosyl groups	A04	+	11	34.3004	0.000164255	0.0103514
Bra035236.1	AT4G11280	ACS6	ACS6 (1-AMINOCYCLOPROPANE-1-CARBOXYLIC ACID (ACC) SYNTHASE 6);1-aminocyclopropane-1-carboxylate synthase	A08	-	4	20.0081	0.000169085	0.0106342
Bra019764.1	AT1G12410	CLPR2,NCLPP2,CLP2	CLP2 (CLP PROTEASE PROTEOLYTIC SUBUNIT 2);serine-type endopeptidase	A06	-	9	30.5182	0.000171119	0.0107404
Bra010028.1	AT5G49570	AtPNG1	AtPNG1 (Arabidopsis thaliana peptide-N-glycanase 1);catalytic/ peptide-N4-(N-acetyl-beta-glucosaminyl)asparagine amidase	A06	+	17	44.396	0.000171685	0.0107542
Bra021756.1	AT2G31870	TEJ	TEJ (Sanskrit for 'bright');poly(ADP-ribose) glycohydrolase	A04	-	11	34.1678	0.000172987	0.010814
Bra019181.1	AT4G25230	RIN2	RIN2 (RPM1 INTERACTING PROTEIN 2);protein binding / ubiquitin-protein ligase/ zinc ion binding	A03	+	12	35.9357	0.000173452	0.0108212
Bra022522.1	AT5G50640	-	CBS domain-containing protein / octicosapeptide/Phox/Bemp1 (PB1) domain-containing protein	A02	+	11	34.1555	0.000173821	0.0108225
Bra026781.1	-	-	-	A09	-	2	14.048	0.000178206	0.0110733
Bra015717.1	AT1G76860	-	small nuclear ribonucleoprotein,putative / snRNP,putative / Sm protein,putative	A07	-	3	17.2156	0.000182673	0.0113283
Bra024271.1	AT5G64150	-	methylase family protein	A06	-	4	19.8225	0.000184741	0.0114337
Bra040449.1	AT3G63520	CCD1,ATCCD1,ATNCED1,NCED1	CCD1 (CAROTENOID CLEAVAGE DIOXYGENASE 1);9-cis-epoxycarotenoid dioxygenase	A04	+	11	33.9715	0.000186764	0.011536
Bra004193.1	AT1G66880	-	serine/threonine protein kinase family protein	A07	+	4	19.7929	0.000187372	0.0115505
Bra016871.1	AT2G42490	-	copper amine oxidase,putative	A04	-	12	35.7126	0.000188899	0.0116216
Bra016561.1	AT1G18300	atnudt4	atnudt4 (Arabidopsis thaliana Nudix hydrolase homolog 4);hydrolase	A08	-	2	13.9225	0.0001905	0.0116969
Bra019707.1	AT1G13730	-	nuclear transport factor 2 (NTF2) family protein / RNA recognition motif (RRM)-containing protein	A06	+	7	26.3538	0.000191262	0.0117206
Bra012867.1	AT3G51130	-	unknown protein	A03	+	17	44.0545	0.000193524	0.0118235
Bra008798.1	AT5G13830	-	FtsJ-like methyltransferase family protein	A10	-	6	24.2577	0.000193703	0.0118235
Bra031807.1	AT5G66200	ARO2	ARO2 (ARMADILLO REPEAT ONLY 2);binding	A02	+	8	28.2939	0.000194495	0.0118486
Bra022488.1	AT1G65220	-	eIF4-gamma/eIF5/eIF2-epsilon domain-containing protein	A02	+	7	26.2262	0.000202043	0.0122843
Bra004331.1	AT1G68690	-	ATP binding / protein kinase/ protein serine/threonine kinase	A07	+	9	30.047	0.000207372	0.0125837
Bra000238.1	AT2G41740	VLN2,ATVLN2	VLN2 (VILLIN 2);actin binding	A03	-	23	53.1918	0.000213541	0.0129328
Bra020433.1	AT4G30270	MERI5B,MERI-5,SEN4	MERI5B (meristem-5);hydrolase,acting on glycosyl bonds / xyloglucan:xyloglucosyl transferase	A02	+	3	16.8876	0.000215236	0.0130101
Bra026617.1	AT2G02070	AtIDD5	AtIDD5 (Arabidopsis thaliana Indeterminate(ID)-Domain 5);nucleic acid binding / transcription factor/ zinc ion binding	A02	-	3	16.8648	0.000217696	0.0131332
Bra037501.1	AT5G48230	EMB1276,ACAT2	ACAT2 (ACETOACETYL-COA THIOLASE 2);acetyl-CoA C-acetyltransferase/ catalytic	A06	-	12	35.3278	0.000218757	0.0131716
Bra031905.1	AT5G65260	-	polyadenylate-binding protein family protein / PABP family protein	A02	+	3	16.8237	0.000222218	0.0133542
Bra008717.1	AT5G15150	ATHB-3,HAT7,ATHB3	ATHB-3 (ARABIDOPSIS THALIANA HOMEOBOX 3);DNA binding / sequence-specific DNA binding / transcription factor	A10	+	3	16.8035	0.000224479	0.013464
Bra026282.1	AT4G28100	-	unknown protein	A01	-	2	13.5843	0.000228083	0.0136538
Bra024384.1	AT5G65430	GRF8,14-3-3KAPPA,GF14 KAPPA	GRF8 (GENERAL REGULATORY FACTOR 8);protein binding / protein phosphorylated amino acid binding	A06	-	4	19.362	0.000230097	0.0137479
Bra002598.1	AT5G59020	-	unknown protein	A10	-	4	19.2965	0.000237389	0.0141563
Bra022520.1	AT3G56150	EIF3C,ATEIF3C-1,EIF3C-1,ATTIF3C1,TIF3C1	EIF3C (EUKARYOTIC TRANSLATION INITIATION FACTOR 3C);translation initiation factor	A02	-	4	19.2919	0.000237919	0.0141607
Bra023485.1	AT5G14740	CA2,CA18,BETA CA2	CA2 (CARBONIC ANHYDRASE 2);carbonate dehydratase/ zinc ion binding	A02	+	8	27.8033	0.000238687	0.0141793
Bra001485.1	AT3G13050	-	transporter-related	A03	+	7	25.828	0.000239677	0.0142109
Bra034149.1	AT3G10860	-	ubiquinol-cytochrome C reductase complex ubiquinone-binding protein,putative / ubiquinol-cytochrome C reductase complex 8.2 kDa protein,putative	A01	-	2	13.4817	0.000240902	0.0142564
Bra026967.1	AT1G12550	-	oxidoreductase family protein	A09	-	4	19.2337	0.000244603	0.0144478
Bra035708.1	AT2G28315	-	LOCATED IN: membrane;CONTAINS InterPro DOMAIN/s: Protein of unknown function DUF250 (InterPro:IPR004853);BEST Arabidopsis thaliana protein match is: transporter-related (TAIR:AT1G06890.2);Has 1852 Blast hits to 1847 proteins in 207 species: Archae - 0;Bacteria - 58;Metazoa - 582;Fungi - 250;Plants - 685;Viruses - 0;Other Eukaryotes - 277 (source: NCBI BLink).	A04	+	8	27.6853	0.000250709	0.0147804
Bra012470.1	AT1G25580	ANAC008	ANAC008 (Arabidopsis NAC domain containing protein 8);transcription factor	A07	-	17	43.2617	0.00025518	0.0150155
Bra010705.1	AT4G39100	SHL1	SHL1 (short life);transcription factor/ zinc-mediated transcriptional activator	A08	+	7	25.6083	0.000263321	0.0154653
Bra014860.1	AT3G53830	-	regulator of chromosome condensation (RCC1) family protein / UVB-resistance protein-related	A04	-	8	27.5525	0.000264955	0.0155318
Bra029606.1	AT3G06810	IBR3	IBR3 (IBA-RESPONSE 3);acyl-CoA dehydrogenase/ oxidoreductase	A05	-	16	41.5179	0.00026652	0.0155942
Bra009940.1	AT3G05590	RPL18	RPL18 (RIBOSOMAL PROTEIN L18);structural constituent of ribosome	A06	-	5	21.3511	0.000269735	0.0157527
Bra033419.1	AT3G52600	AtcwINV2	AtcwINV2 (Arabidopsis thaliana cell wall invertase 2);hydrolase,hydrolyzing O-glycosyl compounds	A04	+	6	23.3715	0.000286601	0.0167062
Bra025219.1	AT3G26650	GAPA,GAPA-1	GAPA (GLYCERALDEHYDE 3-PHOSPHATE DEHYDROGENASE A SUBUNIT);glyceraldehyde-3-phosphate dehydrogenase/ protein binding	A06	-	5	21.0957	0.00030313	0.0176366
Bra015497.1	AT1G06410	ATTPS7,TPS7,ATTPSA	ATTPS7;alpha%2Calpha-trehalose-phosphate synthase (UDP-forming)/ transferase,transferring glycosyl groups / trehalose-phosphatase	A10	-	6	23.2021	0.000308824	0.0179343
Bra024646.1	AT1G27210	-	binding	A09	-	5	21.008	0.00031551	0.0182884
Bra011485.1	AT4G34000	ABF3,DPBF5	ABF3 (ABSCISIC ACID RESPONSIVE ELEMENTS-BINDING FACTOR 3);DNA binding / protein binding / transcription activator/ transcription factor	A01	-	6	23.0736	0.000326804	0.0188791
Bra011848.1	AT1G62020	-	coatomer protein complex,subunit alpha,putative	A01	+	2	12.9095	0.000326916	0.0188791
Bra004750.1	AT2G43160	-	epsin N-terminal homology (ENTH) domain-containing protein	A05	+	13	35.9504	0.000329996	0.0190216
Bra001175.1	AT5G46270	-	ATP binding / nucleoside-triphosphatase/ nucleotide binding / protein binding / transmembrane receptor	A03	-	9	28.8789	0.000332999	0.0191591
Bra031998.1	AT3G03305	-	calcineurin-like phosphoesterase family protein	A02	-	15	39.2496	0.000333704	0.0191642
Bra000473.1	AT2G29690	ASA2,ATHANSYNAB	ASA2 (ANTHRANILATE SYNTHASE 2);anthranilate synthase	A03	-	26	56.1722	0.000344667	0.0197573
Bra034075.1	AT3G09630	-	60S ribosomal protein L4/L1 (RPL4A)	A01	-	3	15.9367	0.000346243	0.0198111
Bra011884.1	AT4G38970	-	fructose-bisphosphate aldolase,putative	A01	-	7	24.9301	0.000351779	0.0200908
Bra037353.1	AT4G00710	BSK3	BSK3 (BR-SIGNALING KINASE 3);ATP binding / binding / kinase/ protein kinase/ protein tyrosine kinase	A09	-	9	28.7359	0.000352765	0.0201102
Bra018346.1	AT1G07160	-	protein phosphatase 2C,putative / PP2C,putative	A05	-	2	12.7232	0.00036115	0.0205505
Bra026147.1	AT1G15290	-	binding	A06	-	21	48.472	0.0003651	0.0207373
Bra038056.1	-	-	-	A08	-	6	22.792	0.000369916	0.0209725
Bra004214.1	AT1G67280	-	lactoylglutathione lyase,putative / glyoxalase I,putative	A07	-	9	28.6053	0.000371836	0.021043
Bra018305.1	AT2G30570	PSBW	PSBW (PHOTOSYSTEM II REACTION CENTER W)	A05	+	2	12.6534	0.000374884	0.0211769
Bra016884.1	AT2G42310	-	unknown protein	A04	+	2	12.6454	0.000376495	0.0212292
Bra032747.1	AT4G13810	AtRLP47	AtRLP47 (Receptor Like Protein 47);protein binding	A04	-	4	18.3049	0.000380543	0.0214187
Bra025561.1	AT5G40610	-	glycerol-3-phosphate dehydrogenase (NAD+) / GPDH	A04	-	16	40.3959	0.000395091	0.0221973
Bra007497.1	AT3G59970	MTHFR1	MTHFR1 (METHYLENETETRAHYDROFOLATE REDUCTASE 1);methylenetetrahydrofolate reductase (NADPH)	A09	+	10	30.2338	0.000400288	0.0224486
Bra020884.1	AT4G21100	DDB1B	DDB1B (Damaged DNA Binding Protein 1 B);damaged DNA binding / protein binding	A08	+	24	52.65	0.000408747	0.0228817
Bra018952.1	AT1G52190	-	proton-dependent oligopeptide transport (POT) family protein	A06	-	4	18.1222	0.000415046	0.0231925
Bra013246.1	AT5G61210	SNAP33,ATSNAP33,SNP33,ATSNAP33B	SNAP33 (SOLUBLE N-ETHYLMALEIMIDE-SENSITIVE FACTOR ADAPTOR PROTEIN 33);SNAP receptor/ protein binding	A03	-	4	18.1164	0.000416196	0.0232151
Bra019519.1	AT3G47940	-	DNAJ heat shock protein,putative	A06	+	2	12.4462	0.000418833	0.0233203
Bra039669.1	AT1G53390	-	ATPase,coupled to transmembrane movement of substances	A06	-	17	41.8144	0.000420543	0.0233736
Bra038725.1	AT3G12490	ATCYSB	cysteine protease inhibitor,putative / cystatin,putative	A01	+	4	18.0726	0.000424942	0.0235759
Bra024270.1	AT5G64130	-	FUNCTIONS IN: molecular_function unknown;INVOLVED IN: biological_process unknown;LOCATED IN: plasma membrane;EXPRESSED IN: 24 plant structures;EXPRESSED DURING: 15 growth stages;CONTAINS InterPro DOMAIN/s: Lg106-like (InterPro:IPR012482);BEST Arabidopsis thaliana protein match is: unknown protein (TAIR:AT1G69510.3);Has 93 Blast hits to 93 proteins in 12 species: Archae - 0;Bacteria - 0;Metazoa - …	A06	-	6	22.469	0.000426314	0.0236099
Bra030660.1	AT1G06680	PSBP-1,OEE2,PSII-P,OE23	PSBP-1 (PHOTOSYSTEM II SUBUNIT P-1);poly(U) binding	A08	-	4	18.0163	0.000436459	0.0241287
Bra015273.1	AT1G03860	ATPHB2	ATPHB2 (PROHIBITIN 2)	A10	+	5	20.2619	0.000443318	0.0244644
Bra008434.1	AT1G80860	ATPLMT,PLMT	PLMT (PHOSPHOLIPID N-METHYLTRANSFERASE);phosphatidyl-N-dimethylethanolamine N-methyltransferase/ phosphatidyl-N-methylethanolamine N-methyltransferase	A02	+	2	12.3189	0.000448401	0.024701
Bra015721.1	AT1G76760	ATY1,TRX-Y1	ATY1 (ARABIDOPSIS THIOREDOXIN Y1);electron carrier/ protein disulfide oxidoreductase	A07	-	4	17.948	0.000450837	0.0247491
Bra037306.1	AT4G00026	-	FUNCTIONS IN: molecular_function unknown;INVOLVED IN: biological_process unknown;LOCATED IN: chloroplast;EXPRESSED IN: cultured cell;CONTAINS InterPro DOMAIN/s: Mitochondrial import inner membrane translocase,subunit Tim21 (InterPro:IPR013261);Has 168 Blast hits to 168 proteins in 84 species: Archae - 0;Bacteria - 0;Metazoa - 92;Fungi - 52;Plants - 20;Viruses - 0;Other Eukaryotes - 4 (source: NCB…	A09	+	7	24.3466	0.000450868	0.0247491
Bra000642.1	AT4G08240	-	unknown protein	A03	-	3	15.3739	0.000458765	0.0251382
Bra025400.1	AT3G29575	AFP3	AFP3 (ABI FIVE BINDING PROTEIN 3)	A06	+	2	12.2344	0.000469157	0.0256624
Bra011454.1	AT4G33580	ATBCA5,BCA5	carbonic anhydrase family protein / carbonate dehydratase family protein	A01	-	19	44.4082	0.00050425	0.027525
Bra035775.1	AT2G41020	-	WW domain-containing protein	A05	+	4	17.7068	0.000505523	0.027525
Bra019830.1	AT1G11790	ADT1	ADT1 (arogenate dehydratase 1);arogenate dehydratase/ prephenate dehydratase	A06	+	24	51.9624	0.000505868	0.027525
Bra028469.1	AT5G40650	SDH2-2	SDH2-2;electron carrier/ succinate dehydrogenase	A02	+	2	12.0698	0.000512463	0.0278106
Bra000326.1	AT2G43790	ATMPK6,MPK6,MAPK6	ATMPK6 (ARABIDOPSIS THALIANA MAP KINASE 6);MAP kinase/ kinase	A03	+	6	22.0471	0.000512905	0.0278106
Bra013116.1	-	-	-	A03	+	2	12.058	0.000515703	0.0279136
Bra028174.1	AT5G38430	-	ribulose bisphosphate carboxylase small chain 1B / RuBisCO small subunit 1B (RBCS-1B) (ATS1B)	A04	+	3	15.1355	0.000516851	0.027927
Bra027188.1	AT3G16140	PSAH-1	PSAH-1 (photosystem I subunit H-1)	A05	+	3	15.0634	0.000535815	0.0289014
Bra003611.1	AT1G79430	APL,WDY	APL (ALTERED PHLOEM DEVELOPMENT);transcription factor/ transcription regulator	A07	+	6	21.8988	0.000547303	0.0294699
Bra014208.1	AT1G49750	-	leucine-rich repeat family protein	A08	-	2	11.9396	0.000549538	0.0295391
Bra013572.1	AT4G21900	-	antiporter/ drug transporter/ transporter	A01	-	13	34.5239	0.000557409	0.02989
Bra024832.1	AT2G02100	LCR69,PDF2.2	LCR69 (LOW-MOLECULAR-WEIGHT CYSTEINE-RICH 69);peptidase inhibitor	A06	-	2	11.9111	0.00055799	0.02989
Bra019653.1	AT1G14380	IQD28	IQD28 (IQ67 DOMAIN PROTEIN 28);calmodulin binding	A06	-	6	21.8479	0.000559622	0.0299258
Bra013013.1	AT5G23060	CaS	CaS (Calcium sensing receptor)	A03	+	6	21.7898	0.000574015	0.0306428
Bra040101.1	AT4G16850	-	unknown protein	A01	-	3	14.8966	0.000582424	0.0310383
Bra010953.1	AT1G27310	NTF2A	NTF2A (NUCLEAR TRANSPORT FACTOR 2A);Ran GTPase binding / protein transporter	A08	+	2	11.8105	0.000588991	0.0313345
Bra032853.1	AT1G27920	MAP65-8	MAP65-8 (MICROTUBULE-ASSOCIATED PROTEIN 65-8)	A09	-	11	30.9798	0.000591248	0.0314008
Bra013952.1	AT4G26120	-	ankyrin repeat family protein / BTB/POZ domain-containing protein	A01	+	4	17.3271	0.000605286	0.0320915
Bra012447.1	AT1G26665	-	FUNCTIONS IN: molecular_function unknown;INVOLVED IN: biological_process unknown;LOCATED IN: cellular_component unknown;EXPRESSED IN: 24 plant structures;EXPRESSED DURING: 15 growth stages;BEST Arabidopsis thaliana protein match is: RNA polymerase II mediator complex protein-related (TAIR:AT5G41910.1);Has 223 Blast hits to 223 proteins in 105 species: Archae - 0;Bacteria - 0;Metazoa - 112;Fungi -…	A07	+	17	40.7384	0.000606829	0.0321185
Bra036630.1	AT5G27450	MVK,MK	MK (MEVALONATE KINASE);mevalonate kinase	A09	-	5	19.5568	0.00061073	0.03227
Bra036512.1	AT5G24430	-	calcium-dependent protein kinase,putative / CDPK,putative	A09	-	11	30.885	0.000612941	0.0322811
Bra018019.1	AT3G48990	-	AMP-dependent synthetase and ligase family protein	A06	+	5	19.5486	0.000613018	0.0322811
Bra026310.1	AT4G27745	-	FUNCTIONS IN: molecular_function unknown;INVOLVED IN: biological_process unknown;LOCATED IN: cellular_component unknown;CONTAINS InterPro DOMAIN/s: Yippee-like protein (InterPro:IPR004910);BEST Arabidopsis thaliana protein match is: yippee family protein (TAIR:AT5G53940.1);Has 697 Blast hits to 697 proteins in 149 species: Archae - 0;Bacteria - 0;Metazoa - 401;Fungi - 132;Plants - 110;Viruses - 0…	A01	+	5	19.5216	0.000620552	0.0326225
Bra007469.1	AT3G59670	-	unknown protein	A09	+	5	19.5173	0.000621758	0.0326308
Bra034662.1	AT4G34910	-	DEAD/DEAH box helicase,putative (RH16)	A08	-	13	34.2089	0.000625216	0.0327569
Bra036864.1	AT4G14500	-	FUNCTIONS IN: molecular_function unknown;INVOLVED IN: biological_process unknown;LOCATED IN: cellular_component unknown;EXPRESSED IN: 24 plant structures;EXPRESSED DURING: 15 growth stages;CONTAINS InterPro DOMAIN/s: Lipid-binding START (InterPro:IPR002913);BEST Arabidopsis thaliana protein match is: unknown protein (TAIR:AT3G23080.1);Has 257 Blast hits to 256 proteins in 63 species: Archae - 0;B…	A01	-	6	21.5523	0.00063679	0.0333071
Bra037514.1	AT5G48030	GFA2	GFA2 (GAMETOPHYTIC FACTOR 2);heat shock protein binding / unfolded protein binding	A06	-	17	40.5556	0.000645574	0.0337098
Bra017011.1	AT2G40340	-	AP2 domain-containing transcription factor,putative (DRE2B)	A04	-	3	14.6856	0.000647224	0.0337393
Bra011405.1	AT4G33010	AtGLDP1	AtGLDP1 (Arabidopsis thaliana glycine decarboxylase P-protein 1);catalytic/ glycine dehydrogenase (decarboxylating)/ pyridoxal phosphate binding	A01	+	14	35.7346	0.000652299	0.0339469
Bra007213.1	AT3G56060	-	glucose-methanol-choline (GMC) oxidoreductase family protein	A09	-	5	19.3763	0.00066283	0.0344372
Bra020393.1	AT5G58070	ATTIL,TIL	TIL (TEMPERATURE-INDUCED LIPOCALIN);binding / transporter	A02	+	2	11.5541	0.000676008	0.0350633
Bra006965.1	AT3G52990	-	pyruvate kinase,putative	A09	+	16	38.7622	0.000695412	0.0360025
Bra007589.1	AT3G61260	-	DNA-binding family protein / remorin family protein	A09	-	5	19.2671	0.000696434	0.0360025
Bra019888.1	AT1G10950	-	endomembrane protein 70,putative	A06	+	12	32.2389	0.000698209	0.0360272
Bra028653.1	AT3G15880	WSIP2,TPR4	protein binding	A02	+	27	55.2585	0.000702755	0.0360272
Bra007747.1	AT3G63460	-	WD-40 repeat family protein	A09	-	22	47.9296	0.000702984	0.0360272
Bra011430.1	AT4G33270	CDC20.1	CDC20.1;signal transducer	A01	+	13	33.8856	0.00070313	0.0360272
Bra028517.1	AT5G41970	-	FUNCTIONS IN: molecular_function unknown;INVOLVED IN: biological_process unknown;LOCATED IN: mitochondrion;EXPRESSED IN: 24 plant structures;EXPRESSED DURING: 13 growth stages;CONTAINS InterPro DOMAIN/s: Metal-dependent protein hydrolase (InterPro:IPR003226);BEST Arabidopsis thaliana protein match is: unknown protein (TAIR:AT3G49320.1);Has 464 Blast hits to 461 proteins in 209 species: Archae - 0…	A02	+	13	33.8846	0.000703389	0.0360272
Bra019758.1	AT1G12320	-	unknown protein	A06	-	2	11.479	0.00070387	0.0360272
Bra024921.1	AT1G01690	-	unknown protein	A06	-	15	37.113	0.000709222	0.0362415
Bra016758.1	AT1G12770	EMB1586	EMB1586 (embryo defective 1586);ATP binding / ATP-dependent helicase/ helicase/ nucleic acid binding	A08	-	2	11.4243	0.000724915	0.0369826
Bra033660.1	AT5G43100	-	aspartyl protease family protein	A06	-	12	32.1284	0.000727364	0.0370467
Bra001594.1	AT3G15380	-	choline transporter-related	A03	+	12	32.101	0.000734783	0.0373633
Bra010220.1	AT4G31800	WRKY18	WRKY18;transcription factor	A08	-	5	19.1437	0.000736457	0.0373872
Bra034041.1	AT1G66970	SVL2	SVL2 (SHV3-LIKE 2);glycerophosphodiester phosphodiesterase/ kinase	A02	-	27	55.092	0.00073803	0.037406
Bra036253.1	AT4G02620	-	vacuolar ATPase subunit F family protein	A09	+	4	16.9001	0.000740982	0.0374944
Bra024187.1	AT4G28640	IAA11	IAA11 (INDOLE-3-ACETIC ACID INDUCIBLE 11);transcription factor	A03	+	5	19.074	0.000760058	0.0383971
Bra009581.1	AT5G02530	-	RNA and export factor-binding protein,putative	A10	+	5	19.0535	0.000767165	0.0386608
Bra005337.1	AT2G35490	-	plastid-lipid associated protein PAP,putative	A05	+	3	14.3441	0.000767766	0.0386608
Bra009583.1	AT5G02500	HSC70-1,HSP70-1,AT-HSC70-1,HSC70	HSC70-1 (HEAT SHOCK COGNATE PROTEIN 70-1);ATP binding	A10	-	3	14.3349	0.000771268	0.0387743
Bra029426.1	AT4G11920	CCS52A2,FZR1	CCS52A2;signal transducer	A09	+	8	24.9276	0.000781567	0.0392286
Bra021812.1	AT2G32765	SUM5,SUMO5,ATSUMO5	SUMO5 (SMALL UBIQUITINRELATED MODIFIER 5);protein tag	A04	+	3	14.2993	0.000785153	0.039345
Bra004482.1	AT2G47020	-	peptide chain release factor,putative	A05	+	10	28.4984	0.000787066	0.0393774
Bra032757.1	AT4G14070	AAE15	AAE15 (acyl-activating enzyme 15);long-chain-fatty-acid-[acyl-carrier-protein] ligase	A04	+	18	41.5122	0.000788426	0.039382
Bra022610.1	AT5G52800	-	DNA primase	A02	-	15	36.7769	0.000797338	0.0397632
Bra011434.1	AT4G33350	-	chloroplast inner membrane import protein Tic22,putative	A01	+	8	24.872	0.00079947	0.0398056
Bra032258.1	AT1G48620	HON5	HON5 (High Mobility Group Family A 5);DNA binding	A05	+	8	24.858	0.000804049	0.0399548
Bra036315.1	AT4G01720	WRKY47,AtWRKY47	WRKY47;transcription factor	A09	-	6	21.0143	0.000805037	0.0399548
Bra024112.1	AT4G30020	-	subtilase family protein	A03	+	9	26.6423	0.00081484	0.0403768
Bra019134.1	AT4G25990	CIL	CIL	A03	-	3	14.1948	0.000827251	0.0409265
Bra027203.1	AT3G15850	FAD5,FADB,JB67,ADS3	FAD5 (FATTY ACID DESATURASE 5);16:0 monogalactosyldiacylglycerol desaturase/ oxidoreductase	A05	-	5	18.88	0.000829762	0.0409855
Bra022044.1	AT5G46550	-	DNA-binding bromodomain-containing protein	A02	-	9	26.5804	0.000835082	0.0411828
Bra008555.1	AT4G01730	-	zinc ion binding	A02	+	9	26.5739	0.000837242	0.0412239
Bra021903.1	AT2G34340	-	unknown protein	A04	-	4	16.6353	0.00083989	0.0412888
Bra010496.1	AT5G11250	-	disease resistance protein (TIR-NBS-LRR class),putative	A08	+	5	18.833	0.000847582	0.0415976
Bra023099.1	AT2G37130	-	peroxidase 21 (PER21) (P21) (PRXR5)	A03	-	5	18.8297	0.000848848	0.0415976
Bra025406.1	AT3G29810	COBL2	COBL2 (COBRA-LIKE PROTEIN 2 PRECURSOR)	A06	-	6	20.8878	0.00085058	0.0416168
Bra035848.1	AT5G63320	-	FUNCTIONS IN: molecular_function unknown;INVOLVED IN: biological_process unknown;LOCATED IN: cellular_component unknown;EXPRESSED IN: 24 plant structures;EXPRESSED DURING: 14 growth stages;CONTAINS InterPro DOMAIN/s: Bromodomain (InterPro:IPR001487);BEST Arabidopsis thaliana protein match is: ATBET9 (Arabidopsis thaliana Bromodomain and Extraterminal Domain protein 9);DNA binding (TAIR:AT5G14270.…	A09	-	18	41.2485	0.000860139	0.0420183
Bra021634.1	AT2G30440	-	chloroplast thylakoidal processing peptidase	A04	+	8	24.6884	0.000861567	0.042022
Bra032652.1	AT1G01860	PFC1	PFC1 (PALEFACE 1);mRNA (2'-O-methyladenosine-N6-)-methyltransferase	A09	-	14	34.937	0.000865743	0.0421595
Bra025874.1	AT1G21130	-	O-methyltransferase,putative	A06	-	3	14.0914	0.000871151	0.0423194
Bra004886.1	AT2G45050	-	zinc finger (GATA type) family protein	A05	+	2	11.0819	0.00087175	0.0423194
Bra040093.1	AT4G16760	ACX1,ATACX1	ACX1 (ACYL-COA OXIDASE 1);acyl-CoA oxidase	A01	+	14	34.912	0.000873415	0.0423341
Bra020566.1	AT5G26990	-	drought-responsive family protein	A02	-	5	18.7217	0.000891297	0.0431335
Bra008766.1	AT5G14320	-	30S ribosomal protein S13,chloroplast (CS13)	A10	+	3	14.0292	0.000898645	0.0434214
Bra009989.1	AT3G04920	-	40S ribosomal protein S24 (RPS24A)	A06	-	5	18.6891	0.000904521	0.0436375
Bra007087.1	AT3G54660	GR,EMB2360,ATGR2	GR (GLUTATHIONE REDUCTASE);ATP binding / glutathione-disulfide reductase	A09	-	10	28.1199	0.000910857	0.0438751
Bra007109.1	AT3G54890	LHCA1	LHCA1;chlorophyll binding	A09	-	4	16.4525	0.000915743	0.0440125
Bra003133.1	AT5G03200	-	zinc finger (C3HC4-type RING finger) family protein	A07	-	3	13.9898	0.000916544	0.0440125
Bra033802.1	AT3G46780	PTAC16	PTAC16 (PLASTID TRANSCRIPTIONALLY ACTIVE 16);binding / catalytic	A01	+	5	18.6482	0.000921411	0.044178
Bra006034.1	AT5G09820	-	plastid-lipid associated protein PAP / fibrillin family protein	A03	-	5	18.6299	0.000929045	0.0444753
Bra005281.1	AT2G36330	-	FUNCTIONS IN: molecular_function unknown;LOCATED IN: plasma membrane,membrane;EXPRESSED IN: 22 plant structures;EXPRESSED DURING: 13 growth stages;CONTAINS InterPro DOMAIN/s: Uncharacterised protein family UPF0497,trans-membrane plant (InterPro:IPR006702);BEST Arabidopsis thaliana protein match is: integral membrane protein,putative (TAIR:AT5G62820.1);Has 132 Blast hits to 130 proteins in 15 spec…	A05	-	2	10.9552	0.00093343	0.0446056
Bra025385.1	AT3G29240	-	unknown protein	A06	-	2	10.9528	0.000934638	0.0446056
Bra037536.1	AT3G19170	ATPREP1,ATZNMP	ATPREP1 (PRESEQUENCE PROTEASE 1);metalloendopeptidase	A01	+	20	43.9958	0.000945632	0.0450611
Bra004634.1	AT2G41660	MIZ1	MIZ1 (mizu-kussei 1)	A05	+	2	10.9162	0.000953267	0.0453021
Bra028729.1	AT5G06530	-	ABC transporter family protein	A02	-	10	28.0007	0.000953606	0.0453021
Bra003374.1	AT3G59390	-	unknown protein	A07	+	6	20.6032	0.000962464	0.0455982
Bra018942.1	AT1G52030	MBP2,MBP1.2,F-ATMBP	MBP2 (MYROSINASE-BINDING PROTEIN 2);sugar binding / thioglucosidase binding	A06	+	4	16.3465	0.000962773	0.0455982
Bra005283.1	AT2G36310	URH1	URH1 (URIDINE-RIBOHYDROLASE 1);adenosine nucleosidase/ hydrolase/ inosine nucleosidase/ uridine nucleosidase	A05	+	9	26.1835	0.000976978	0.0462005
Bra007235.1	AT3G56310	-	alpha-galactosidase,putative / melibiase,putative / alpha-D-galactoside galactohydrolase,putative	A09	+	13	32.9695	0.000978692	0.0462112
Bra011553.1	AT4G34700	-	complex 1 family protein / LVR family protein	A01	-	5	18.4915	0.00098891	0.0466228
Bra024827.1	AT2G02230	AtPP2-B1	AtPP2-B1 (Phloem protein 2-B1);carbohydrate binding	A06	+	3	13.8323	0.00099166	0.0466817
Bra004990.1	AT2G40090	ATATH9	ATATH9;transporter	A05	+	12	31.2812	0.000993767	0.0467101
Bra015246.1	AT2G15900	-	phox (PX) domain-containing protein	A10	-	15	36.1287	0.000998128	0.0468171
Bra011398.1	AT4G32940	GAMMA-VPE,GAMMAVPE	GAMMA-VPE (GAMMA VACUOLAR PROCESSING ENZYME);cysteine-type endopeptidase	A01	+	9	26.1269	0.000999057	0.0468171
Bra018710.1	AT1G65500	-	unknown protein	A06	-	2	10.8263	0.00100069	0.046823
Bra013076.1	AT2G16400	BLH7	BLH7 (bell1-like homeodomain 7);DNA binding / transcription factor	A03	-	4	16.2504	0.00100753	0.047072
Bra000643.1	AT4G08230	-	glycine-rich protein	A03	+	4	16.246	0.00100961	0.0470986
Bra000316.1	AT2G43640	-	signal recognition particle 14 kDa family protein / SRP14 family protein	A03	-	3	13.7878	0.00101398	0.0472312
Bra026471.1	AT5G24030	SLAH3	SLAH3 (SLAC1 HOMOLOGUE 3);transporter	A01	-	4	16.2171	0.00102348	0.0476027
Bra025111.1	AT5G44720	-	molybdenum cofactor sulfurase family protein	A06	-	8	24.1443	0.00107469	0.0499099
Bra038259.1	AT3G20290	ATEHD1	ATEHD1 (EPS15 HOMOLOGY DOMAIN 1);GTP binding / GTPase/ calcium ion binding	A01	+	17	39.0177	0.00108125	0.0501395
Bra022655.1	AT5G53420	-	FUNCTIONS IN: molecular_function unknown;INVOLVED IN: biological_process unknown;LOCATED IN: cellular_component unknown;EXPRESSED IN: 23 plant structures;EXPRESSED DURING: 13 growth stages;CONTAINS InterPro DOMAIN/s: CCT domain (InterPro:IPR010402);BEST Arabidopsis thaliana protein match is: unknown protein (TAIR:AT4G27900.2);Has 863 Blast hits to 863 proteins in 62 species: Archae - 0;Bacteria -…	A02	-	4	16.0704	0.00109693	0.0507905
Bra016864.1	AT2G42620	MAX2,ORE9,PP2	MAX2 (MORE AXILLARY BRANCHES 2);ubiquitin-protein ligase	A04	+	2	10.6502	0.00110061	0.0508854
Bra019150.1	AT4G25610	-	zinc finger (C2H2 type) family protein	A03	+	17	38.9542	0.00110428	0.0509789
Bra011201.1	AT4G30530	-	defense-related protein,putative	A01	-	3	13.6108	0.0011078	0.0510606
Bra010264.1	AT4G30950	FAD6,FADC,SFD4	FAD6 (FATTY ACID DESATURASE 6);omega-6 fatty acid desaturase	A08	+	10	27.6068	0.00110934	0.0510606
Bra033249.1	AT1G01610	ATGPAT4,GPAT4	GPAT4 (GLYCEROL-3-PHOSPHATE ACYLTRANSFERASE 4);1-acylglycerol-3-phosphate O-acyltransferase/ acyltransferase	A10	-	3	13.5713	0.00112989	0.0519297
Bra010984.1	AT1G25275	-	unknown protein	A08	+	3	13.554	0.00113969	0.0523026
Bra033452.1	AT3G52140	-	tetratricopeptide repeat (TPR)-containing protein	A04	-	27	53.555	0.00115465	0.0529112
Bra001510.1	AT3G13530	MAPKKK7,MAP3KE1	MAPKKK7;ATP binding / binding / kinase/ protein kinase/ protein serine/threonine kinase/ protein tyrosine kinase	A03	-	23	47.7645	0.0011654	0.0533252
Bra033756.1	AT5G44635	MCM6	minichromosome maintenance family protein / MCM family protein	A06	+	18	40.2708	0.00118504	0.0541442
Bra028910.1	AT5G01750	-	unknown protein	A02	-	3	13.4704	0.00118832	0.0542142
Bra031186.1	AT2G21390	-	coatomer protein complex,subunit alpha,putative	A09	-	6	20.1103	0.00119156	0.0542822
Bra013606.1	AT4G22270	-	unknown protein	A01	+	6	20.0994	0.00119715	0.0544572
Bra006519.1	AT5G19820	emb2734	emb2734 (embryo defective 2734);binding / lyase	A03	-	20	43.2419	0.0012011	0.054557
Bra037045.1	AT4G32730	PC-MYB1,MYB3R-1,ATMYB3R-1,ATMYB3R1,MYB3R1	PC-MYB1;DNA binding / transcription coactivator/ transcription factor	A03	+	11	29.0797	0.00120955	0.0548188
Bra026115.1	AT1G15690	AVP1,ATAVP3,AVP-3	AVP1;ATPase/ hydrogen-translocating pyrophosphatase	A06	+	8	23.8504	0.00121039	0.0548188
Bra037445.1	AT5G48960	-	5' nucleotidase family protein	A06	+	17	38.672	0.00121262	0.0548395
Bra022964.1	AT2G34040	-	apoptosis inhibitory 5 (API5) family protein	A03	-	16	37.1207	0.00121514	0.0548738
Bra037493.1	AT5G39740	OLI7,RPL5B	60S ribosomal protein L5 (RPL5B)	A06	+	9	25.6242	0.00121761	0.0549056
Bra040482.1	AT2G46820	PTAC8,TMP14,PSAP,PSI-P	PSI-P (PHOTOSYSTEM I P SUBUNIT);DNA binding	A04	+	6	20.0368	0.00123001	0.0553844
Bra015501.1	AT1G06460	ACD32.1,ACD31.2	ACD32.1 (ALPHA-CRYSTALLIN DOMAIN 32.1)	A10	+	6	20.016	0.0012411	0.0558027
Bra022036.1	AT5G46450	-	disease resistance protein (TIR-NBS-LRR class),putative	A02	+	6	19.9974	0.00125116	0.0561738
Bra000900.1	AT4G02010	-	protein kinase family protein	A03	-	7	21.9113	0.00125651	0.0562645
Bra010009.1	AT5G28750	-	thylakoid assembly protein,putative	A06	-	2	10.4049	0.0012568	0.0562645
Bra030411.1	AT1G51870	-	protein kinase family protein	A05	+	10	27.2552	0.00126903	0.0567302
Bra025121.1	AT2G03620	-	magnesium transporter CorA-like family protein (MRS2-5)	A06	+	6	19.9086	0.00130004	0.058033
Bra013576.1	AT4G21960	PRXR1	PRXR1;electron carrier/ heme binding / peroxidase	A01	-	4	15.6966	0.00130854	0.0583284
Bra019784.1	AT1G12760	-	protein binding / ubiquitin-protein ligase/ zinc ion binding	A06	-	5	17.8637	0.00131216	0.0584059
Bra013145.1	AT2G13540	ENS,ABH1,CBP80,ATCBP80	ABH1 (ABA HYPERSENSITIVE 1);RNA cap binding	A03	-	18	39.9466	0.00131682	0.0585296
Bra030951.1	AT1G53240	-	malate dehydrogenase (NAD),mitochondrial	A08	+	7	21.7937	0.00131965	0.0585715
Bra004835.1	AT2G44450	BGLU15	BGLU15 (BETA GLUCOSIDASE 15);catalytic/ cation binding / hydrolase,hydrolyzing O-glycosyl compounds	A05	+	12	30.4897	0.00132679	0.0588044
Bra028595.1	AT5G10180	AST68,SULTR2%3B1	AST68;sulfate transmembrane transporter	A02	-	10	27.0882	0.00135252	0.0598598
Bra014305.1	AT1G51980	-	mitochondrial processing peptidase alpha subunit,putative	A08	+	13	32.0244	0.00137185	0.0606286
Bra016187.1	AT1G70780	-	unknown protein	A07	-	2	10.2228	0.00138711	0.0612162
Bra028544.1	AT3G52950	-	CBS domain-containing protein / octicosapeptide/Phox/Bemp1 (PB1) domain-containing protein	A02	+	4	15.5642	0.00139278	0.0613789
Bra014002.1	AT4G13940	HOG1,EMB1395,SAHH1,MEE58,ATSAHH1	MEE58 (MATERNAL EFFECT EMBRYO ARREST 58);adenosylhomocysteinase/ copper ion binding	A08	-	2	10.211	0.00139605	0.061436
Bra023306.1	AT3G27890	NQR	NQR (NADPH:QUINONE OXIDOREDUCTASE);FMN reductase	A09	+	3	13.111	0.00142228	0.0625018
Bra006058.1	AT5G44050	-	MATE efflux family protein	A03	-	9	25.22	0.00142652	0.0625996
Bra014427.1	AT3G61640	AGP20,AtAGP20	AGP20	A04	+	2	10.1666	0.00143006	0.0626664
Bra023343.1	AT5G11790	-	Ndr family protein	A02	+	11	28.6228	0.00143375	0.0627005
Bra004283.1	AT1G68130	AtIDD14	AtIDD14 (Arabidopsis thaliana Indeterminate(ID)-Domain 14);nucleic acid binding / transcription factor/ zinc ion binding	A07	+	3	13.0934	0.00143487	0.0627005
Bra016721.1	AT1G13900	-	calcineurin-like phosphoesterase family protein	A08	+	2	10.1456	0.00144645	0.0631176
Bra024677.1	AT1G26870	FEZ,ANAC009	FEZ (FEZ);transcription factor	A09	+	3	13.0689	0.00145253	0.0632939
Bra028777.1	AT5G04890	RTM2	RTM2 (RESTRICTED TEV MOVEMENT 2)	A02	+	4	15.4486	0.0014708	0.0639189
Bra029685.1	AT3G07890	-	RabGAP/TBC domain-containing protein	A05	+	7	21.5327	0.00147098	0.0639189
Bra020041.1	AT5G19485	-	transferase	A02	-	18	39.5997	0.0014734	0.0639345
Bra004668.1	AT2G42070	ATNUDT23,ATNUDX23	ATNUDX23 (ARABIDOPSIS THALIANA NUDIX HYDROLASE HOMOLOG 23);FAD diphosphatase/ hydrolase	A05	-	5	17.5865	0.00148619	0.0643996
Bra027403.1	AT3G13750	BGAL1	BGAL1 (Beta galactosidase 1);beta-galactosidase/ catalytic/ cation binding / heme binding / peroxidase/ sugar binding	A05	-	18	39.5564	0.00149419	0.0646562
Bra020888.1	AT4G21192	-	FUNCTIONS IN: molecular_function unknown;INVOLVED IN: biological_process unknown;LOCATED IN: cellular_component unknown;CONTAINS InterPro DOMAIN/s: Cytochrome c oxidase biogenesis protein Cmc1-like (InterPro:IPR013892);Has 111 Blast hits to 111 proteins in 53 species: Archae - 0;Bacteria - 0;Metazoa - 71;Fungi - 29;Plants - 9;Viruses - 0;Other Eukaryotes - 2 (source: NCBI BLink).	A08	-	3	13.0023	0.00150171	0.064891
Bra038368.1	AT4G09750	-	short-chain dehydrogenase/reductase (SDR) family protein	A09	-	10	26.801	0.0015088	0.0651069
Bra018248.1	AT2G31390	-	pfkB-type carbohydrate kinase family protein	A05	+	4	15.3837	0.00151644	0.0653458
Bra010534.1	AT4G35450	AKR2,AFT,AKR2A	AKR2 (ANKYRIN REPEAT-CONTAINING PROTEIN 2);protein binding	A08	-	8	23.2749	0.00152645	0.0656861
Bra007649.1	AT3G62000	-	O-methyltransferase family 3 protein	A09	-	9	25.0093	0.00154895	0.0665618
Bra018347.1	AT2G30010	-	INVOLVED IN: biological_process unknown;EXPRESSED IN: 22 plant structures;EXPRESSED DURING: 13 growth stages;CONTAINS InterPro DOMAIN/s: Protein of unknown function DUF231,plant (InterPro:IPR004253);BEST Arabidopsis thaliana protein match is: PMR5 (POWDERY MILDEW RESISTANT 5) (TAIR:AT5G58600.1);Has 709 Blast hits to 698 proteins in 16 species: Archae - 0;Bacteria - 0;Metazoa - 0;Fungi - 0;Plants …	A05	-	5	17.4906	0.00155152	0.0665805
Bra011548.1	AT4G34640	SQS1,ERG9	SQS1 (SQUALENE SYNTHASE 1);farnesyl-diphosphate farnesyltransferase	A01	-	13	31.654	0.00156442	0.0670412
Bra013786.1	AT4G24280	cpHsc70-1	cpHsc70-1 (chloroplast heat shock protein 70-1);ATP binding	A01	+	8	23.2086	0.00156773	0.0670621
Bra029235.1	AT5G63160	BT1	BT1 (BTB AND TAZ DOMAIN PROTEIN 1);protein binding / transcription regulator	A02	-	5	17.4653	0.00156922	0.0670621
Bra029899.1	AT3G48500	PDE312,PTAC10	RNA binding	A01	+	12	30.0185	0.00157404	0.0671559
Bra017612.1	AT4G33760	-	tRNA synthetase class II (D,K and N) family protein	A03	-	8	23.1959	0.00157574	0.0671559
Bra027852.1	-	-	-	A09	+	3	12.8685	0.00160563	0.0683362
Bra022369.1	AT3G18890	-	binding / catalytic/ coenzyme binding	A05	-	15	34.7081	0.00162344	0.0689993
Bra020408.1	AT5G57860	-	ubiquitin family protein	A02	-	3	12.8373	0.00163087	0.0692205
Bra009181.1	AT5G06290	2-Cys Prx B	2-Cys Prx B (2-Cysteine peroxiredoxin B);antioxidant/ peroxiredoxin	A10	+	7	21.279	0.00163441	0.0692761
Bra034783.1	AT3G12050	-	Aha1 domain-containing protein	A05	-	3	12.8235	0.00164212	0.0695082
Bra033613.1	AT4G39330	ATCAD9,CAD9	CAD9 (CINNAMYL ALCOHOL DEHYDROGENASE 9);binding / catalytic/ oxidoreductase/ zinc ion binding	A06	-	5	17.3584	0.00164632	0.0695912
Bra022481.1	AT1G65410	ATNAP11,TGD3	ATNAP11 (ARABIDOPSIS THALIANA NON-INTRINSIC ABC PROTEIN 11);transporter	A02	+	10	26.542	0.00166461	0.0702685
Bra014802.1	AT3G54650	FBL17	FBL17;ubiquitin-protein ligase	A04	+	14	33.0522	0.00167353	0.0705496
Bra019526.1	AT2G31400	-	pentatricopeptide (PPR) repeat-containing protein	A06	-	5	17.3144	0.00167908	0.0706872
Bra034288.1	AT2G25970	-	KH domain-containing protein	A04	-	7	21.1873	0.0016977	0.0713747
Bra037226.1	AT2G18300	-	basic helix-loop-helix (bHLH) family protein	A09	+	6	19.2854	0.00170046	0.071394
Bra018591.1	AT1G08930	ERD6	ERD6 (EARLY RESPONSE TO DEHYDRATION 6);carbohydrate transmembrane transporter/ sugar transmembrane transporter/ sugar:hydrogen symporter	A06	+	18	39.1468	0.00170494	0.0714856
Bra017385.1	AT2G03430	-	ankyrin repeat family protein	A09	+	5	17.2729	0.00171064	0.0716278
Bra015971.1	AT1G73720	-	transducin family protein / WD-40 repeat family protein	A07	+	16	36.0926	0.00171422	0.0716812
Bra016689.1	AT1G14670	-	endomembrane protein 70,putative	A08	-	7	21.1573	0.00171897	0.071783
Bra013272.1	AT4G17980	anac071	anac071 (Arabidopsis NAC domain containing protein 71);transcription factor	A01	-	4	15.1049	0.00172914	0.0719682
Bra006550.1	AT5G20260	-	catalytic	A03	-	4	15.1036	0.00173024	0.0719682
Bra026314.1	AT4G27700	-	rhodanese-like domain-containing protein	A01	-	6	19.2432	0.00173155	0.0719682
Bra003567.1	AT1G80460	NHO1,GLI1	NHO1 (nonhost resistance to P. s. phaseolicola 1);carbohydrate kinase/ glycerol kinase	A07	-	4	15.1006	0.00173267	0.0719682
Bra037825.1	AT5G65710	HSL2	HSL2 (HAESA-Like 2);ATP binding / kinase/ protein serine/threonine kinase	A09	+	2	9.80398	0.00174135	0.0722323
Bra037279.1	AT2G17250	EMB2762	EMB2762 (EMBRYO DEFECTIVE 2762)	A09	+	15	34.4872	0.0017497	0.0724818
Bra029854.1	AT1G66240	ATX1,ATATX1	ATX1 (ARABIDOPSIS HOMOLOG OF ANTI-OXIDANT 1);metal ion binding	A05	+	3	12.687	0.0017581	0.072733
Bra004630.1	AT2G41630	TFIIB	TFIIB (TRANSCRIPTION FACTOR II B);RNA polymerase II transcription factor/ protein binding / transcription regulator/ translation initiation factor/ zinc ion binding	A05	-	8	22.918	0.00176157	0.0727455
Bra037465.1	AT5G48720	XRI,XRI1	XRI1 (X-RAY INDUCED TRANSCRIPT 1)	A06	+	9	24.6748	0.0017645	0.0727455
Bra000460.1	AT2G47730	ATGSTF8,ATGSTF5,GST6,GSTF8	ATGSTF8 (ARABIDOPSIS THALIANA GLUTATHIONE S-TRANSFERASE PHI 8);glutathione binding / glutathione transferase	A03	+	3	12.6787	0.00176543	0.0727455
Bra002883.1	AT4G13350	NIG	NIG (NSP (NUCLEAR SHUTTLE PROTEIN)-INTERACTING GTPASE);GTP binding / GTPase	A10	+	7	21.0505	0.00179671	0.0739365
Bra035048.1	AT1G78570	RHM1,ROL1,ATRHM1	RHM1 (RHAMNOSE BIOSYNTHESIS 1);UDP-L-rhamnose synthase/ UDP-glucose 4%2C6-dehydratase/ catalytic	A07	+	2	9.73472	0.0018082	0.0743108
Bra035866.1	AT5G63040	-	unknown protein	A09	+	5	17.121	0.00183109	0.0750813
Bra009826.1	AT5G25220	KNAT3	KNAT3 (KNOTTED1-LIKE HOMEOBOX GENE 3);transcription activator/ transcription factor	A06	+	6	19.1122	0.00183178	0.0750813
Bra011878.1	AT4G39080	VHA-A3	VHA-A3 (VACUOLAR PROTON ATPASE A3);ATPase	A01	+	17	37.4082	0.00183653	0.0751767
Bra011871.1	AT4G39200	-	40S ribosomal protein S25 (RPS25E)	A01	+	4	14.965	0.00184678	0.0754971
Bra003444.1	AT3G61270	-	FUNCTIONS IN: molecular_function unknown;INVOLVED IN: biological_process unknown;LOCATED IN: cellular_component unknown;CONTAINS InterPro DOMAIN/s: Lipopolysaccharide-modifying protein (InterPro:IPR006598),Protein of unknown function DUF821,CAP10-like (InterPro:IPR008539);BEST Arabidopsis thaliana protein match is: DTA2 (DOWNSTREAM TARGET OF AGL15 2) (TAIR:AT2G45830.1);Has 461 Blast hits to 457 p…	A07	+	5	17.0951	0.00185238	0.0756261
Bra003489.1	AT3G62140	-	unknown protein	A07	+	7	20.9706	0.00185708	0.0757186
Bra005475.1	AT2G33740	CUTA	CUTA;copper ion binding	A05	-	6	19.057	0.00187573	0.076379
Bra009709.1	AT5G23850	-	FUNCTIONS IN: molecular_function unknown;INVOLVED IN: biological_process unknown;LOCATED IN: cellular_component unknown;EXPRESSED IN: 23 plant structures;EXPRESSED DURING: 13 growth stages;CONTAINS InterPro DOMAIN/s: Lipopolysaccharide-modifying protein (InterPro:IPR006598),Protein of unknown function DUF821,CAP10-like (InterPro:IPR008539);BEST Arabidopsis thaliana protein match is: unknown prote…	A06	+	6	19.0495	0.00188175	0.0765237
Bra009706.1	AT5G23740	RPS11-BETA	RPS11-BETA (RIBOSOMAL PROTEIN S11-BETA);structural constituent of ribosome	A06	-	5	17.0205	0.00191531	0.0777791
Bra026187.1	AT1G14790	RDR1,ATRDRP1	RDR1 (RNA-DEPENDENT RNA POLYMERASE 1);RNA-directed RNA polymerase/ nucleic acid binding	A06	-	3	12.5133	0.00191763	0.0777791
Bra013582.1	AT4G22010	sks4	sks4 (SKU5 Similar 4);copper ion binding / oxidoreductase	A01	+	6	18.9982	0.00192359	0.077919
Bra026353.1	AT4G27410	RD26,ANAC072	RD26 (RESPONSIVE TO DESICCATION 26);transcription activator/ transcription factor	A01	-	3	12.4906	0.00193955	0.0783932
Bra011260.1	AT4G31340	-	myosin heavy chain-related	A01	-	14	32.6233	0.00194034	0.0783932
Bra012380.1	AT1G23550	SRO2	SRO2 (SIMILAR TO RCD ONE 2);NAD+ ADP-ribosyltransferase	A07	-	5	16.981	0.00194943	0.0785908
Bra026567.1	AT2G03120	ATSPP	ATSPP (ARABIDOPSIS SIGNAL PEPTIDE PEPTIDASE);aspartic-type endopeptidase	A02	-	11	27.7901	0.00195029	0.0785908
Bra014344.1	AT1G15120	-	ubiquinol-cytochrome C reductase complex 7.8 kDa protein,putative / mitochondrial hinge protein,putative	A08	+	3	12.4402	0.00198908	0.0800051
Bra004738.1	AT2G43040	NPG1	NPG1 (no pollen germination 1);calmodulin binding	A05	-	5	16.9344	0.00199054	0.0800051
Bra010018.1	AT5G30510	RPS1,ARRPS1	RPS1 (RIBOSOMAL PROTEIN S1);RNA binding / structural constituent of ribosome	A06	-	7	20.7982	0.00199416	0.0800474
Bra036138.1	AT5G49520	WRKY48,ATWRKY48	WRKY48;transcription factor	A09	+	3	12.4239	0.00200532	0.0803915
Bra002382.1	AT5G21990	-	tetratricopeptide repeat (TPR)-containing protein	A10	-	20	41.5848	0.00201579	0.0807069
Bra000867.1	AT1G56220	-	dormancy/auxin associated family protein	A03	+	3	12.3861	0.00204357	0.0816603
Bra001550.1	AT3G14415	-	(S)-2-hydroxy-acid oxidase,peroxisomal,putative / glycolate oxidase,putative / short chain alpha-hydroxy acid oxidase,putative	A03	+	11	27.6613	0.00204486	0.0816603
Bra004945.1	AT2G45890	ATROPGEF4,ROPGEF4	ROPGEF4 (RHO GUANYL-NUCLEOTIDE EXCHANGE FACTOR 4);Rho guanyl-nucleotide exchange factor	A05	+	7	20.7293	0.0020517	0.0818282
Bra016422.1	AT1G21410	SKP2A	SKP2A	A08	-	4	14.7179	0.00207429	0.0826232
Bra005522.1	AT2G33150	PKT3,PED1,KAT2	PKT3 (PEROXISOMAL 3-KETOACYL-COA THIOLASE 3);acetyl-CoA C-acyltransferase	A05	+	14	32.4204	0.00208045	0.0827329
Bra014800.1	AT3G54610	HAT1,GCN5,HAG1,HAC3,HAG01,BGT	GCN5;DNA binding / H3 histone acetyltransferase/ histone acetyltransferase	A04	+	13	30.8419	0.00208237	0.0827329
Bra025284.1	AT3G27540	-	glycosyl transferase family 17 protein	A06	-	2	9.46031	0.00209965	0.083313
Bra027371.1	AT3G14120	-	FUNCTIONS IN: molecular_function unknown;INVOLVED IN: transport;LOCATED IN: nuclear pore;EXPRESSED IN: 23 plant structures;EXPRESSED DURING: 13 growth stages;CONTAINS InterPro DOMAIN/s: Nuclear pore protein 84/107 (InterPro:IPR007252);Has 207 Blast hits to 206 proteins in 78 species: Archae - 0;Bacteria - 0;Metazoa - 123;Fungi - 57;Plants - 22;Viruses - 0;Other Eukaryotes - 5 (source: NCBI BLink).	A05	-	24	47.2161	0.002105	0.0834187
Bra035067.1	AT1G78830	-	curculin-like (mannose-binding) lectin family protein	A07	-	2	9.44824	0.00211351	0.0836494
Bra019370.1	AT4G22590	-	trehalose-6-phosphate phosphatase,putative	A03	-	7	20.6542	0.00211631	0.0836534
Bra038724.1	AT3G12480	NF-YC11	NF-YC11 (NUCLEAR FACTOR Y,SUBUNIT C11);DNA binding / transcription factor	A01	-	6	18.7546	0.00213522	0.0842935
Bra032681.1	AT4G12910	scpl20	scpl20 (serine carboxypeptidase-like 20);serine-type carboxypeptidase	A04	+	13	30.7419	0.00215653	0.0848994
Bra029783.1	AT2G06990	HEN2	HEN2 (hua enhancer 2);ATP-dependent helicase/ RNA helicase	A05	-	16	35.3984	0.00215721	0.0848994
Bra015879.1	AT1G74960	FAB1,KAS2	FAB1 (FATTY ACID BIOSYNTHESIS 1);3-oxoacyl-[acyl-carrier-protein] synthase/ fatty-acid synthase	A07	-	13	30.7366	0.00216054	0.0848994
Bra003531.1	AT1G79790	-	haloacid dehalogenase-like hydrolase family protein	A07	-	6	18.7261	0.00216149	0.0848994
Bra029232.1	AT5G63280	-	zinc finger (C2H2 type) family protein	A02	+	9	24.1479	0.00216449	0.0849097
Bra007444.1	AT3G59350	-	serine/threonine protein kinase,putative	A09	+	4	14.6122	0.00217993	0.0854078
Bra016041.1	AT1G72680	ATCAD1,CAD1	cinnamyl-alcohol dehydrogenase,putative	A07	-	6	18.6981	0.00218746	0.0855667
Bra012203.1	AT1G20020	ATLFNR2,FNR2	FNR2 (FERREDOXIN-NADP(+)-OXIDOREDUCTASE 2);NADPH dehydrogenase/ oxidoreductase/ poly(U) binding	A07	-	9	24.1182	0.0021895	0.0855667
Bra009644.1	AT3G08740	-	elongation factor P (EF-P) family protein	A10	+	7	20.5511	0.00220822	0.0861898
Bra034138.1	-	-	-	A01	-	2	9.35809	0.00222004	0.0865424
Bra024952.1	AT5G47240	atnudt8	atnudt8 (Arabidopsis thaliana Nudix hydrolase homolog 8);hydrolase	A06	-	7	20.5099	0.00224598	0.0874439
Bra012982.1	AT5G61120	-	INVOLVED IN: biological_process unknown;EXPRESSED IN: 8 plant structures;EXPRESSED DURING: 6 growth stages;BEST Arabidopsis thaliana protein match is: nucleic acid binding (TAIR:AT5G61090.1);Has 77 Blast hits to 70 proteins in 8 species: Archae - 0;Bacteria - 0;Metazoa - 20;Fungi - 0;Plants - 56;Viruses - 0;Other Eukaryotes - 1 (source: NCBI BLink).	A03	-	8	22.2841	0.00226908	0.088233
Bra024680.1	AT1G26830	CUL3A,ATCUL3A,ATCUL3,CUL3	ATCUL3 (ARABIDOPSIS THALIANA CULLIN 3);protein binding / ubiquitin-protein ligase	A09	+	2	9.29942	0.00229226	0.0890228
Bra008640.1	AT5G16150	GLT1,PGLCT	PGLCT (PLASTIDIC GLC TRANSLOCATOR);carbohydrate transmembrane transporter/ sugar:hydrogen symporter	A10	-	13	30.549	0.00230701	0.0894837
Bra029349.1	AT5G60890	ATMYB34,ATR1,MYB34	MYB34 (MYB DOMAIN PROTEIN 34);DNA binding / kinase/ transcription activator/ transcription factor	A02	+	3	12.1392	0.00231208	0.0895685
Bra023925.1	AT3G20820	-	leucine-rich repeat family protein	A01	-	2	9.27055	0.00232868	0.0900992
Bra002078.1	AT2G17700	-	protein kinase family protein	A10	+	16	35.1601	0.00233315	0.09016
Bra029857.1	AT3G10620	ATNUDX26	ATNUDX26 (ARABIDOPSIS THALIANA NUDIX HYDROLASE HOMOLOG 26);bis(5'-adenosyl)-pentaphosphatase/ bis(5'-nucleosyl)-tetraphosphatase (asymmetrical)	A05	-	7	20.4132	0.0023372	0.0902044
Bra037490.1	AT5G48380	-	leucine-rich repeat family protein / protein kinase family protein	A06	-	2	9.25465	0.00234898	0.0905464
Bra011645.1	AT4G35860	ATRABB1B,ATGB2,ATRAB2C	ATGB2 (GTP-BINDING 2);GTP binding	A01	+	6	18.5194	0.00236114	0.0909024
Bra035639.1	AT5G56960	-	basic helix-loop-helix (bHLH) family protein	A02	+	5	16.5339	0.00238039	0.0915301
Bra030524.1	AT1G03190	ATXPD,UVH6	UVH6 (ULTRAVIOLET HYPERSENSITIVE 6);ATP binding / ATP-dependent DNA helicase/ ATP-dependent helicase/ DNA binding / hydrolase,acting on acid anhydrides,in phosphorus-containing anhydrides / nucleic acid binding	A08	-	19	39.5215	0.00242388	0.0930873
Bra016840.1	AT1G11310	MLO2,ATMLO2,PMR2	MLO2 (MILDEW RESISTANCE LOCUS O 2);calmodulin binding	A08	+	14	31.9214	0.00246754	0.0945535
Bra017503.1	AT5G47110	-	lil3 protein,putative	A09	+	3	12.0086	0.00246815	0.0945535
Bra024808.1	AT2G02760	ATUBC2,UBC2	ATUBC2 (UBIQUITING-CONJUGATING ENZYME 2);ubiquitin-protein ligase	A06	-	5	16.4396	0.00248259	0.0949896
Bra009289.1	AT5G07140	-	protein kinase family protein	A10	-	9	23.7687	0.00250561	0.0956464
Bra004028.1	AT1G68585	-	unknown protein	A07	-	3	11.9782	0.00250591	0.0956464
Bra006334.1	AT5G15950	-	adenosylmethionine decarboxylase family protein	A03	+	2	9.13221	0.00251148	0.0957415
Bra007835.1	AT2G24700	-	transcriptional factor B3 family protein	A09	+	9	23.7476	0.00252605	0.0961788
Bra002261.1	AT5G19770	TUA3	TUA3;structural constituent of cytoskeleton	A10	-	5	16.3822	0.00254693	0.0967994
Bra035526.1	AT5G35700	FIM2	FIM2 (FIMBRIN-LIKE PROTEIN 2);actin binding	A08	+	14	31.8266	0.00254858	0.0967994
Bra033808.1	AT3G46670	UGT76E11	UGT76E11 (UDP-GLUCOSYL TRANSFERASE 76E11);UDP-glycosyltransferase/ quercetin 3-O-glucosyltransferase/ quercetin 7-O-glucosyltransferase/ transferase,transferring glycosyl groups	A01	-	2	9.09972	0.00255648	0.0969809
Bra021971.1	AT5G45410	-	unknown protein	A02	-	3	11.935	0.00256068	0.0970215
Bra031943.1	AT5G63940	-	protein kinase family protein	A02	+	10	25.3927	0.00256618	0.0970889
Bra031247.1	AT3G21055	PSBTN	PSBTN (photosystem II subunit T)	A05	+	2	9.091	0.00256871	0.0970889
Bra033576.1	AT4G38810	-	calcium-binding EF hand family protein	A06	+	5	16.3533	0.00257998	0.0973965
Bra002869.1	AT5G55900	-	sucrase-related	A10	+	5	16.3446	0.00258991	0.0975963
Bra007104.1	AT3G54840	ARA6,ATRABF1,ARA-6,ATRAB5C	ARA6;GTP binding / GTPase	A09	+	8	21.9498	0.00259155	0.0975963
Bra033552.1	AT4G38360	-	unknown protein	A06	+	6	18.2959	0.00259756	0.0977042
Bra001372.1	AT3G10650	-	FUNCTIONS IN: molecular_function unknown;INVOLVED IN: biological_process unknown;LOCATED IN: cellular_component unknown;EXPRESSED IN: 24 plant structures;EXPRESSED DURING: 14 growth stages;BEST Arabidopsis thaliana protein match is: nucleoporin-related (TAIR:AT5G20200.1);Has 51621 Blast hits to 25162 proteins in 1378 species: Archae - 161;Bacteria - 11485;Metazoa - 15659;Fungi - 10121;Plants - 10…	A03	-	9	23.6595	0.00261313	0.0980195
Bra006084.1	AT4G40030	-	histone H3.2	A03	-	2	9.05941	0.00261346	0.0980195
Bra017070.1	AT2G39460	ATRPL23A,RPL23A,RPL23AA	RPL23AA (RIBOSOMAL PROTEIN L23AA);RNA binding / nucleotide binding / structural constituent of ribosome	A04	+	3	11.8911	0.00261745	0.0980195
Bra035087.1	AT1G79040	PSBR	PSBR (photosystem II subunit R)	A07	+	4	14.2216	0.00261856	0.0980195
Bra022871.1	AT2G31900	XIF,ATXIF,ATMYO5	XIF;motor	A03	-	43	72.1011	0.00263285	0.0984355
Bra010099.1	AT5G62570	-	calmodulin-binding protein	A06	+	7	20.1055	0.00265214	0.0990375
Bra034103.1	AT3G10300	-	calcium-binding EF hand family protein	A01	-	5	16.2801	0.00266549	0.0994166
Bra024895.1	AT2G01250	-	60S ribosomal protein L7 (RPL7B)	A06	+	5	16.2756	0.0026708	0.0994953
Bra026212.1	AT1G14480	-	protein binding	A06	-	2	8.99316	0.00270991	0.100832
Bra016541.1	AT1G18800	NRP2	NRP2 (NAP1-RELATED PROTEIN 2);DNA binding / chromatin binding / histone binding	A08	+	9	23.5524	0.00272294	0.101195
Bra027540.1	AT5G44290	-	protein kinase family protein	A09	+	7	20.0339	0.00273116	0.101379
Bra011586.1	AT4G35110	-	FUNCTIONS IN: molecular_function unknown;INVOLVED IN: biological_process unknown;LOCATED IN: cellular_component unknown;EXPRESSED IN: 15 plant structures;EXPRESSED DURING: 10 growth stages;CONTAINS InterPro DOMAIN/s: Phospholipase-like,arabidopsis (InterPro:IPR007942);BEST Arabidopsis thaliana protein match is: unknown protein (TAIR:AT2G16900.1);Has 491 Blast hits to 408 proteins in 102 species: …	A01	+	2	8.97587	0.00273569	0.101426
Bra037489.1	AT5G48385	-	FUNCTIONS IN: molecular_function unknown;INVOLVED IN: biological_process unknown;LOCATED IN: cellular_component unknown;CONTAINS InterPro DOMAIN/s: Frigida-like (InterPro:IPR012474);BEST Arabidopsis thaliana protein match is: hydroxyproline-rich glycoprotein family protein (TAIR:AT3G22440.1);Has 987 Blast hits to 921 proteins in 78 species: Archae - 0;Bacteria - 16;Metazoa - 58;Fungi - 7;Plants -…	A06	+	3	11.7868	0.00275756	0.102115
Bra009215.1	AT5G05470	EIF2 ALPHA,ATEIF2-A2,EIF2-A2	EIF2 ALPHA;RNA binding / translation initiation factor	A10	+	7	20.0013	0.00276789	0.102351
Bra037564.1	AT3G18770	-	LOCATED IN: chloroplast;EXPRESSED IN: 6 plant structures;EXPRESSED DURING: 4 anthesis,petal differentiation and expansion stage;CONTAINS InterPro DOMAIN/s: Autophagy-related protein 13 (InterPro:IPR018731);BEST Arabidopsis thaliana protein match is: unknown protein (TAIR:AT3G49590.2);Has 376 Blast hits to 291 proteins in 100 species: Archae - 0;Bacteria - 15;Metazoa - 70;Fungi - 108;Plants - 62;V…	A01	+	3	11.7774	0.00277052	0.102351
Bra018736.1	AT1G48570	-	zinc finger (Ran-binding) family protein	A06	+	7	19.9953	0.00277478	0.102387
Bra027816.1	AT1G60080	-	3' exoribonuclease family domain 1-containing protein	A09	+	8	21.7724	0.00278036	0.102471
Bra025009.1	AT5G46630	-	clathrin adaptor complexes medium subunit family protein	A06	-	13	30.0042	0.00278836	0.102644
Bra003564.1	AT1G80380	-	phosphoribulokinase/uridine kinase-related	A07	+	10	25.1496	0.00281009	0.103322
Bra003053.1	AT5G53490	-	thylakoid lumenal 17.4 kDa protein,chloroplast	A10	-	4	14.0601	0.00282448	0.103728
Bra017121.1	AT2G38380	-	peroxidase 22 (PER22) (P22) (PRXEA) / basic peroxidase E	A04	+	4	14.0535	0.00283321	0.103887
Bra007227.1	AT3G56210	-	binding	A09	-	6	18.0902	0.00283551	0.103887
Bra007664.1	AT3G62140	-	unknown protein	A09	+	7	19.9033	0.00288129	0.10544
Bra020725.1	AT5G47890	-	NADH-ubiquinone oxidoreductase B8 subunit,putative	A02	+	3	11.6944	0.00288791	0.105558
Bra024577.1	AT1G23290	RPL27A,RPL27AB	RPL27AB;structural constituent of ribosome	A09	-	2	8.86981	0.00289925	0.105848
Bra002752.1	AT4G25990	CIL	CIL	A10	+	3	11.6816	0.00290656	0.105856
Bra000346.1	AT2G44200	-	unknown protein	A03	+	3	11.6803	0.00290836	0.105856
Bra023706.1	AT5G19140	ATAILP1,AILP1	AILP1	A02	+	2	8.86324	0.0029097	0.105856
Bra028179.1	AT5G38380	-	FUNCTIONS IN: molecular_function unknown;INVOLVED IN: biological_process unknown;LOCATED IN: cellular_component unknown;EXPRESSED IN: 22 plant structures;EXPRESSED DURING: 14 growth stages;BEST Arabidopsis thaliana protein match is: cation efflux family protein (TAIR:AT2G04620.1);Has 90 Blast hits to 90 proteins in 28 species: Archae - 0;Bacteria - 0;Metazoa - 66;Fungi - 0;Plants - 18;Viruses - 0…	A04	-	4	13.9892	0.00291991	0.106104
Bra039756.1	AT1G66200	ATGSR2	ATGSR2;copper ion binding / glutamate-ammonia ligase	A02	-	10	25.0071	0.00296339	0.107478
Bra015444.1	AT1G05610	APS2	APS2 (ADP-glucose pyrophoshorylase small subunit 2);glucose-1-phosphate adenylyltransferase/ nucleotidyltransferase/ transferase	A10	+	8	21.6101	0.00296464	0.107478
Bra030107.1	AT1G28580	-	GDSL-motif lipase,putative	A07	+	5	16.0296	0.00297965	0.107794
Bra030303.1	AT2G21330	-	fructose-bisphosphate aldolase,putative	A04	-	7	19.8208	0.00298029	0.107794
Bra023312.1	AT5G11200	-	DEAD/DEAH box helicase,putative	A02	+	11	26.6219	0.00298797	0.107946
Bra011810.1	AT4G40050	-	signal transducer	A01	-	9	23.3	0.00299967	0.108023
Bra018897.1	AT1G51160	-	synbindin,putative	A06	-	4	13.9311	0.00300046	0.108023
Bra019248.1	AT4G24050	-	short-chain dehydrogenase/reductase (SDR) family protein	A03	+	8	21.579	0.00300135	0.108023
Bra015909.1	AT1G74450	-	unknown protein	A07	+	2	8.80502	0.00300402	0.108023
Bra006459.1	AT5G18420	-	unknown protein	A03	-	12	28.1851	0.00303257	0.108898
Bra036110.1	AT5G27150	NHX1,ATNHX,AT-NHX1,ATNHX1	NHX1 (NA+/H+ EXCHANGER);protein binding / sodium ion transmembrane transporter/ sodium:hydrogen antiporter	A09	+	13	29.7589	0.00303537	0.108898
Bra005907.1	AT5G06710	HAT14	HAT14 (HOMEOBOX FROM ARABIDOPSIS THALIANA);DNA binding / transcription factor	A03	-	4	13.884	0.00306739	0.10992
Bra025312.1	AT3G27925	DEGP1,Deg1	DEGP1 (DegP protease 1);serine-type endopeptidase/ serine-type peptidase	A06	+	8	21.5096	0.00308472	0.110414
Bra011287.1	AT4G31620	-	transcriptional factor B3 family protein	A01	+	4	13.8689	0.00308917	0.110446
Bra003833.1	AT1G73680	-	pathogen-responsive alpha-dioxygenase,putative	A07	+	9	23.2176	0.00309579	0.110555
Bra025926.1	AT1G18180	-	oxidoreductase,acting on the CH-CH group of donors	A06	+	9	23.204	0.00311202	0.111007
Bra014710.1	AT2G40280	-	dehydration-responsive family protein	A04	+	8	21.4752	0.00312691	0.11141
Bra024909.1	AT2G01060	-	myb family transcription factor	A06	+	6	17.8574	0.00313059	0.111414
Bra032698.1	AT4G13350	NIG	NIG (NSP (NUCLEAR SHUTTLE PROTEIN)-INTERACTING GTPASE);GTP binding / GTPase	A04	+	15	32.7331	0.00314744	0.111885
Bra035877.1	AT3G48050	-	DNA binding / protein binding / transcription regulator	A09	-	3	11.5196	0.00315178	0.111912
Bra024293.1	AT5G64400	-	FUNCTIONS IN: molecular_function unknown;INVOLVED IN: biological_process unknown;EXPRESSED IN: 25 plant structures;EXPRESSED DURING: 15 growth stages;CONTAINS InterPro DOMAIN/s: CHCH (InterPro:IPR010625);BEST Arabidopsis thaliana protein match is: unknown protein (TAIR:AT5G09570.1);Has 218 Blast hits to 216 proteins in 80 species: Archae - 0;Bacteria - 10;Metazoa - 66;Fungi - 60;Plants - 47;Virus…	A06	+	5	15.8827	0.00318067	0.112809
Bra014020.1	AT1G44100	AAP5	AAP5;amino acid transmembrane transporter/ basic amino acid transmembrane transporter	A08	+	5	15.8718	0.00319609	0.113226
Bra013523.1	AT4G21390	B120	B120;ATP binding / protein kinase/ protein serine/threonine kinase/ sugar binding	A01	-	6	17.8024	0.00320455	0.113397
Bra000317.1	AT2G43650	EMB2777	EMB2777 (EMBRYO DEFECTIVE 2777)	A03	+	16	34.17	0.00322303	0.113921
Bra032104.1	AT2G24330	-	unknown protein	A04	-	5	15.8274	0.00325974	0.115087
Bra010572.1	AT4G36730	GBF1	GBF1;sequence-specific DNA binding / transcription factor	A08	-	10	24.7468	0.00326444	0.115122
Bra025844.1	AT1G20810	-	immunophilin / FKBP-type peptidyl-prolyl cis-trans isomerase family protein	A06	+	6	17.7501	0.00327644	0.115303
Bra019353.1	AT1G14800	-	FUNCTIONS IN: molecular_function unknown;INVOLVED IN: biological_process unknown;LOCATED IN: cellular_component unknown;CONTAINS InterPro DOMAIN/s: Nucleic acid-binding,OB-fold (InterPro:IPR012340),Nucleic acid-binding,OB-fold-like (InterPro:IPR016027);BEST Arabidopsis thaliana protein match is: F-box family protein (TAIR:AT2G35280.1);Has 109 Blast hits to 109 proteins in 8 species: Archae - 0;Ba…	A03	-	5	15.8155	0.00327698	0.115303
Bra026105.1	AT1G15780	-	unknown protein	A06	-	25	47.0494	0.00330371	0.116112
Bra034245.1	AT3G26700	-	protein kinase family protein	A01	-	13	29.5069	0.00331104	0.116238
Bra024044.1	AT4G30780	-	unknown protein	A03	+	6	17.6969	0.00335123	0.117516
Bra015801.1	AT1G75950	SKP1,ASK1,ATSKP1,SKP1A,UIP1	SKP1 (S PHASE KINASE-ASSOCIATED PROTEIN 1);protein binding / ubiquitin-protein ligase	A07	+	2	8.58872	0.00338252	0.11848
Bra034763.1	AT3G12290	-	tetrahydrofolate dehydrogenase/cyclohydrolase,putative	A05	-	5	15.7377	0.00339205	0.11868
Bra004058.1	AT3G45140	LOX2,ATLOX2	LOX2 (LIPOXYGENASE 2);lipoxygenase	A07	+	8	21.2653	0.00339664	0.118707
Bra037418.1	AT4G01510	ARV2	ARV2	A09	-	9	22.9672	0.00340664	0.118922
Bra027282.1	AT3G15070	-	zinc finger (C3HC4-type RING finger) family protein	A05	+	5	15.6951	0.00345683	0.120539
Bra018960.1	AT1G52300	-	60S ribosomal protein L37 (RPL37B)	A06	+	4	13.6218	0.00346784	0.120787
Bra018565.1	AT1G09340	CRB,CSP41B	CRB (CHLOROPLAST RNA BINDING);binding / catalytic/ coenzyme binding	A06	+	10	24.558	0.0035011	0.121809
Bra004272.1	AT1G67970	AT-HSFA8,HSFA8	AT-HSFA8;DNA binding / transcription factor	A07	-	2	8.51987	0.00351289	0.122083
Bra039006.1	AT2G19590	ACO1	ACO1 (ACC OXIDASE 1);1-aminocyclopropane-1-carboxylate oxidase	A07	+	4	13.5679	0.00355649	0.123331
Bra022067.1	AT3G01780	TPLATE	TPLATE;binding	A02	+	6	17.5557	0.00355806	0.123331
Bra021549.1	AT3G14310	ATPME3	ATPME3;pectinesterase	A01	+	3	11.2738	0.00356387	0.123331
Bra005637.1	AT2G31865	-	poly (ADP-ribose) glycohydrolase (PARG) family protein	A05	+	11	26.1335	0.00356469	0.123331
Bra022956.1	AT2G33830	-	dormancy/auxin associated family protein	A03	-	3	11.2652	0.00357934	0.1237
Bra001000.1	AT3G01590	-	aldose 1-epimerase family protein	A03	-	13	29.2596	0.00360475	0.12444
Bra030251.1	AT2G22250	ATAAT,AAT,MEE17	aminotransferase class I and II family protein	A04	-	9	22.8081	0.00361961	0.124814
Bra023645.1	AT5G17920	ATCIMS,ATMETS,ATMS1	ATMS1;5-methyltetrahydropteroyltriglutamate-homocysteine S-methyltransferase/ copper ion binding / methionine synthase	A02	+	10	24.4605	0.00362971	0.125007
Bra019001.1	AT1G52920	GCR2,GPCR	GPCR (G PROTEIN COUPLED RECEPTOR);abscisic acid binding / catalytic	A06	+	7	19.3353	0.00363323	0.125007
Bra008034.1	AT1G72460	-	leucine-rich repeat transmembrane protein kinase,putative	A02	+	2	8.44802	0.0036544	0.125596
Bra029673.1	AT3G07740	ADA2A,ATADA2A,HAC10,HXA02,HXA2	ADA2A (HOMOLOG OF YEAST ADA2 2A);DNA binding / transcription factor/ zinc ion binding	A05	+	13	29.2145	0.00366102	0.125684
Bra014473.1	AT3G60750	-	transketolase,putative	A04	-	7	19.3125	0.00366724	0.125759
Bra030316.1	AT2G21170	TIM	TIM (TRIOSEPHOSPHATE ISOMERASE);catalytic/ triose-phosphate isomerase	A04	-	8	21.0658	0.00367399	0.125851
Bra015556.1	AT1G07150	MAPKKK13	MAPKKK13;ATP binding / kinase/ protein kinase/ protein serine/threonine kinase	A10	+	2	8.43148	0.00368781	0.126186
Bra009794.1	AT5G24810	-	ABC1 family protein	A06	-	19	38.1213	0.00373275	0.127583
Bra013460.1	AT4G20380	LSD1	zinc finger protein (LSD1)	A01	+	6	17.4254	0.00375986	0.128368
Bra005267.1	AT2G36420	-	unknown protein	A05	-	3	11.1454	0.00380027	0.129517
Bra006107.1	AT5G11670	ATNADP-ME2	ATNADP-ME2 (NADP-malic enzyme 2);malate dehydrogenase (oxaloacetate-decarboxylating) (NADP+)/ malic enzyme/ oxidoreductase,acting on NADH or NADPH,NAD or NADP as acceptor	A03	+	18	36.6075	0.00380218	0.129517
Bra012827.1	AT3G51950	-	zinc finger (CCCH-type) family protein / RNA recognition motif (RRM)-containing protein	A03	-	6	17.3954	0.00380785	0.129517
Bra019438.1	AT3G44370	-	binding	A06	-	14	30.6358	0.00381018	0.129517
Bra037267.1	AT2G17510	EMB2763	EMB2763 (EMBRYO DEFECTIVE 2763);RNA binding / ribonuclease	A09	-	25	46.5285	0.0038225	0.129794
Bra013681.1	AT4G23280	-	protein kinase,putative	A01	+	14	30.6116	0.00384123	0.130287
Bra020572.1	AT4G14960	TUA6	TUA6;structural constituent of cytoskeleton	A02	+	8	20.9459	0.00385112	0.130418
Bra008600.1	AT5G16730	-	LOCATED IN: chloroplast;EXPRESSED IN: 23 plant structures;EXPRESSED DURING: 13 growth stages;CONTAINS InterPro DOMAIN/s: Spectrin/alpha-actinin (InterPro:IPR018159);BEST Arabidopsis thaliana protein match is: unknown protein (TAIR:AT3G02930.1);Has 241703 Blast hits to 112530 proteins in 2711 species: Archae - 2642;Bacteria - 41887;Metazoa - 104467;Fungi - 18239;Plants - 8786;Viruses - 1373;Other …	A10	-	3	11.1176	0.00385347	0.130418
Bra029934.1	AT4G22620	-	auxin-responsive family protein	A01	+	2	8.34474	0.00386805	0.130769
Bra017386.1	AT2G03420	-	unknown protein	A09	+	4	13.3742	0.0038935	0.131486
Bra004751.1	AT2G43190	-	ribonuclease P family protein	A05	+	7	19.1616	0.00389923	0.131537
Bra039311.1	AT2G45820	-	DNA-binding protein,putative	A04	-	4	13.3666	0.00390732	0.131632
Bra003672.1	AT1G77710	-	INVOLVED IN: biological_process unknown;LOCATED IN: cellular_component unknown;EXPRESSED IN: 24 plant structures;EXPRESSED DURING: 15 growth stages;CONTAINS InterPro DOMAIN/s: Ubiquitin-like,Ufm1 (InterPro:IPR005375);Has 170 Blast hits to 170 proteins in 79 species: Archae - 0;Bacteria - 0;Metazoa - 105;Fungi - 0;Plants - 27;Viruses - 0;Other Eukaryotes - 38 (source: NCBI BLink).	A07	-	4	13.3648	0.00391053	0.131632
Bra040436.1	AT3G63180	ATTKL,TKL	TKL (TIC-LIKE)	A04	-	11	25.8719	0.0039163	0.131683
Bra021755.1	AT2G31865	-	poly (ADP-ribose) glycohydrolase (PARG) family protein	A04	-	9	22.5856	0.00393911	0.132307
Bra001232.1	AT3G07050	-	GTP-binding family protein	A03	-	9	22.5783	0.00395009	0.132533
Bra032741.1	AT4G13820	-	disease resistance family protein / LRR family protein	A04	+	2	8.29507	0.00397528	0.133203
Bra005137.1	AT2G38110	ATGPAT6,GPAT6	GPAT6 (GLYCEROL-3-PHOSPHATE ACYLTRANSFERASE 6);1-acylglycerol-3-phosphate O-acyltransferase/ acyltransferase	A05	+	2	8.29354	0.00397864	0.133203
Bra017491.1	AT5G47330	-	palmitoyl protein thioesterase family protein	A09	-	7	19.1022	0.00399442	0.133472
Bra012374.1	AT1G23440	-	pyrrolidone-carboxylate peptidase family protein	A07	-	4	13.3189	0.00399527	0.133472
Bra018532.1	AT1G56220	-	dormancy/auxin associated family protein	A05	+	3	11.0363	0.00401321	0.133927
Bra029699.1	AT3G08550	ELD1,ABI8,KOB1	KOB1 (KOBITO)	A05	-	9	22.5293	0.00402423	0.134151
Bra025425.1	AT3G28345	-	ABC transporter family protein	A06	-	9	22.5222	0.00403509	0.134369
Bra032942.1	AT3G26700	-	protein kinase family protein	A02	-	9	22.5102	0.00405342	0.134781
Bra009461.1	AT5G04360	ATPU1,ATLDA,PU1	ATLDA (LIMIT DEXTRINASE);alpha-amylase/ limit dextrinase/ pullulanase	A10	-	32	55.8261	0.00405615	0.134781
Bra026408.1	AT4G26700	ATFIM1,FIM1	ATFIM1;actin binding	A01	+	27	49.0373	0.00408859	0.135714
Bra024005.1	AT4G31480	-	coatomer beta subunit,putative / beta-coat protein,putative / beta-COP,putative	A03	+	4	13.2607	0.0041055	0.13613
Bra038684.1	AT5G06560	-	unknown protein	A01	+	2	8.23299	0.00411356	0.136252
Bra005795.1	AT5G04130	-	DNA topoisomerase,ATP-hydrolyzing,putative / DNA topoisomerase II,putative / DNA gyrase,putative	A03	-	19	37.7731	0.00415005	0.137314
Bra024383.1	AT5G65420	CYCD4%3B1	CYCD4%3B1 (CYCLIN D4%3B1);cyclin-dependent protein kinase regulator	A06	-	6	17.1869	0.00415861	0.137451
Bra036704.1	AT2G19780	-	leucine-rich repeat family protein / extensin family protein	A09	-	2	8.20519	0.00417707	0.137914
Bra035154.1	AT1G80770	PDE318	PDE318 (pigment defective 318);GTP binding	A07	-	13	28.7831	0.00424283	0.139937
Bra002290.1	AT5G20290	-	40S ribosomal protein S8 (RPS8A)	A10	+	5	15.2239	0.00425861	0.140248
Bra011118.1	AT4G29510	ATPRMT11,PRMT11,ATPRMT1B,PRMT1B	PRMT11 (ARGININE METHYLTRANSFERASE 11);protein-arginine N-methyltransferase	A01	-	9	22.3783	0.00426128	0.140248
Bra019390.1	AT4G22270	-	unknown protein	A03	+	4	13.1719	0.00427932	0.140692
Bra028542.1	AT3G52920	-	unknown protein	A02	+	4	13.1659	0.00429115	0.140932
Bra020235.1	AT5G60700	-	glycosyltransferase family protein 2	A02	+	3	10.897	0.00430284	0.141167
Bra025180.1	AT3G26070	-	plastid-lipid associated protein PAP / fibrillin family protein	A06	-	6	17.0986	0.00431661	0.141368
Bra011484.1	AT4G33980	-	unknown protein	A01	+	5	15.1926	0.00431806	0.141368
Bra018556.1	AT4G02380	SAG21,AtLEA5	SAG21 (SENESCENCE-ASSOCIATED GENE 21)	A05	+	2	8.13756	0.00433576	0.141797
Bra015946.1	AT1G73990	SPPA	SPPA;serine-type endopeptidase	A07	+	13	28.7135	0.0043446	0.141881
Bra035512.1	AT1G32200	ATS1,ACT1	ATS1;glycerol-3-phosphate O-acyltransferase	A08	+	12	27.1592	0.00434743	0.141881
Bra025433.1	AT5G38210	-	serine/threonine protein kinase family protein	A04	+	5	15.1582	0.00438413	0.14275
Bra027639.1	AT1G63420	-	INVOLVED IN: biological_process unknown;EXPRESSED IN: 22 plant structures;EXPRESSED DURING: 13 growth stages;CONTAINS InterPro DOMAIN/s: Lipopolysaccharide-modifying protein (InterPro:IPR006598),Protein of unknown function DUF821,CAP10-like (InterPro:IPR008539);BEST Arabidopsis thaliana protein match is: unknown protein (TAIR:AT5G23850.1);Has 456 Blast hits to 452 proteins in 97 species: Archae -…	A09	-	7	18.8723	0.00438481	0.14275
Bra014105.1	AT1G48175	emb2191	emb2191 (embryo defective 2191);catalytic/ hydrolase/ zinc ion binding	A08	-	6	17.0598	0.00438784	0.14275
Bra036676.1	AT2G20490	NOP10,EDA27	NOP10;RNA binding	A09	+	2	8.11325	0.00439428	0.142809
Bra027338.1	AT3G14420	-	(S)-2-hydroxy-acid oxidase,peroxisomal,putative / glycolate oxidase,putative / short chain alpha-hydroxy acid oxidase,putative	A05	-	11	25.5408	0.00440939	0.143151
Bra019374.1	AT4G22570	APT3	APT3 (ADENINE PHOSPHORIBOSYL TRANSFERASE 3);adenine phosphoribosyltransferase	A03	-	8	20.5935	0.00442077	0.143371
Bra004959.1	AT2G46070	ATMPK12,MAPK12,MPK12	MPK12 (MITOGEN-ACTIVATED PROTEIN KINASE 12);MAP kinase/ kinase	A05	-	7	18.8475	0.00442914	0.143492
Bra009947.1	AT5G27700	-	structural constituent of ribosome	A06	+	3	10.8277	0.00445456	0.143786
Bra007041.1	AT3G54050	-	fructose-1%2C6-bisphosphatase,putative / D-fructose-1%2C6-bisphosphate 1-phosphohydrolase,putative / FBPase,putative	A09	+	4	13.0854	0.00445553	0.143786
Bra037486.1	AT3G01880	-	unknown protein	A06	-	7	18.8317	0.00445743	0.143786
Bra011511.1	AT4G34240	ALDH3I1,ALDH3	1);3-chloroallyl aldehyde dehydrogenase/ aldehyde dehydrogenase (NAD)	A01	-	9	22.2577	0.00446016	0.143786
Bra035722.1	AT5G51050	-	mitochondrial substrate carrier family protein	A04	-	4	13.0806	0.00446545	0.143786
Bra011180.1	AT1G65310	ATXTH17,XTH17	XTH17 (XYLOGLUCAN ENDOTRANSGLUCOSYLASE/HYDROLASE 17);hydrolase,acting on glycosyl bonds / hydrolase,hydrolyzing O-glycosyl compounds / xyloglucan:xyloglucosyl transferase	A01	+	3	10.8225	0.00446599	0.143786
Bra007957.1	AT1G71030	ATMYBL2,MYBL2	MYBL2 (ARABIDOPSIS MYB-LIKE 2);DNA binding / transcription factor	A02	-	3	10.8155	0.00448164	0.144141
Bra020738.1	AT3G30380	-	INVOLVED IN: biological_process unknown;LOCATED IN: cellular_component unknown;EXPRESSED IN: 21 plant structures;EXPRESSED DURING: 12 growth stages;CONTAINS InterPro DOMAIN/s: Alpha/beta hydrolase fold-1 (InterPro:IPR000073);BEST Arabidopsis thaliana protein match is: unknown protein (TAIR:AT3G01690.1);Has 3127 Blast hits to 3124 proteins in 513 species: Archae - 3;Bacteria - 775;Metazoa - 627;Fu…	A02	+	5	15.1026	0.00449311	0.14436
Bra038865.1	-	-	-	A01	-	3	10.804	0.00450754	0.144674
Bra004211.1	AT1G67250	-	proteasome maturation factor UMP1 family protein	A07	-	4	13.0434	0.00454365	0.145638
Bra027704.1	AT1G64510	-	ribosomal protein S6 family protein	A09	+	2	8.05137	0.00454693	0.145638
Bra029328.1	AT5G61210	SNAP33,ATSNAP33,SNP33,ATSNAP33B	SNAP33 (SOLUBLE N-ETHYLMALEIMIDE-SENSITIVE FACTOR ADAPTOR PROTEIN 33);SNAP receptor/ protein binding	A02	+	4	13.0279	0.0045766	0.146319
Bra017461.1	AT2G01250	-	60S ribosomal protein L7 (RPL7B)	A09	+	6	16.9593	0.00457762	0.146319
Bra029101.1	AT5G52900	-	unknown protein	A03	+	2	8.03612	0.00458537	0.146416
Bra021340.1	AT1G54450	-	calcium-binding EF-hand family protein	A01	+	11	25.4257	0.00459447	0.146462
Bra009005.1	AT5G10840	-	endomembrane protein 70,putative	A10	+	18	35.9931	0.00459625	0.146462
Bra025280.1	AT4G27710	CYP709B3	CYP709B3;electron carrier/ heme binding / iron ion binding / monooxygenase/ oxygen binding	A06	-	9	22.1715	0.00460785	0.146682
Bra000424.1	AT2G46470	OXA1L	OXA1L (INNER MEMBRANE PROTEIN OXA1-LIKE)	A03	+	9	22.1552	0.00463637	0.147438
Bra007376.1	AT3G58040	SINAT2	SINAT2 (SEVEN IN ABSENTIA OF ARABIDOPSIS 2);protein binding / ubiquitin-protein ligase/ zinc ion binding	A09	+	4	12.9798	0.0046805	0.148684
Bra013846.1	AT4G24920	-	protein transport protein SEC61 gamma subunit,putative	A01	-	2	7.99549	0.00468941	0.148684
Bra007620.1	AT3G61620	RRP41	RRP41;3'-5'-exoribonuclease/ RNA binding	A09	-	10	23.7643	0.0046899	0.148684
Bra019738.1	AT1G12050	-	fumarylacetoacetase,putative	A06	-	14	29.9858	0.00473194	0.149864
Bra031654.1	AT1G09020	SNF4,ATSNF4	SNF4 (HOMOLOG OF YEAST SUCROSE NONFERMENTING 4);protein kinase activator	A09	+	13	28.4408	0.00476633	0.150799
Bra035184.1	AT1G80410	EMB2753	EMB2753 (EMBRYO DEFECTIVE 2753);binding	A07	+	26	47.0889	0.00478617	0.151154
Bra020136.1	AT5G20920	EIF2 BETA	EIF2 BETA;translation initiation factor	A02	-	9	22.0703	0.00478727	0.151154
Bra003345.1	AT3G58610	-	ketol-acid reductoisomerase	A07	+	10	23.6948	0.00481087	0.151745
Bra035469.1	AT1G57990	ATPUP18	ATPUP18;purine transmembrane transporter	A01	-	2	7.94642	0.00481826	0.151824
Bra026145.1	AT1G48900	-	signal recognition particle 54 kDa protein 3 / SRP54 (SRP-54C)	A06	-	9	22.0451	0.00483294	0.152
Bra004568.1	AT2G40435	-	EXPRESSED IN: 20 plant structures;EXPRESSED DURING: 13 growth stages;BEST Arabidopsis thaliana protein match is: transcription regulator (TAIR:AT3G56220.1);Has 165 Blast hits to 165 proteins in 20 species: Archae - 0;Bacteria - 0;Metazoa - 0;Fungi - 0;Plants - 165;Viruses - 0;Other Eukaryotes - 0 (source: NCBI BLink).	A05	+	4	12.9108	0.00483362	0.152
Bra029301.1	AT5G61900	BON1,CPN1,BON	BON1 (BONZAI 1);calcium-dependent phospholipid binding	A02	-	16	32.8818	0.00487373	0.153106
Bra031325.1	AT3G22104	-	phototropic-responsive NPH3 protein-related	A05	-	3	10.6429	0.00488567	0.153239
Bra032009.1	AT3G03200	anac045	anac045 (Arabidopsis NAC domain containing protein 45);transcription factor	A02	-	6	16.8035	0.00488784	0.153239
Bra038266.1	AT3G46000	ADF2	ADF2 (ACTIN DEPOLYMERIZING FACTOR 2);actin binding	A06	+	3	10.6378	0.00489821	0.15341
Bra038743.1	AT3G12685	-	FUNCTIONS IN: molecular_function unknown;INVOLVED IN: biological_process unknown;LOCATED IN: cellular_component unknown;EXPRESSED IN: 20 plant structures;EXPRESSED DURING: 14 growth stages;CONTAINS InterPro DOMAIN/s: Acid phosphatase/vanadium-dependent haloperoxidase related (InterPro:IPR003832);BEST Arabidopsis thaliana protein match is: unknown protein (TAIR:AT1G24350.1);Has 607 Blast hits to 6…	A01	+	4	12.8687	0.00492923	0.154226
Bra023192.1	AT3G16060	-	kinesin motor family protein	A09	-	11	25.1958	0.00498653	0.155862
Bra014246.1	AT1G50370	-	serine/threonine protein phosphatase,putative	A08	-	10	23.5933	0.00499275	0.155899
Bra022874.1	AT2G31990	-	exostosin family protein	A03	-	6	16.7485	0.00500232	0.156041
Bra037097.1	AT1G55860	UPL1	UPL1 (UBIQUITIN-PROTEIN LIGASE 1);ubiquitin-protein ligase	A05	+	6	16.7427	0.00501456	0.156208
Bra001050.1	AT3G02540	RAD23-3	RAD23-3 (PUTATIVE DNA REPAIR PROTEIN RAD23-3);damaged DNA binding	A03	-	12	26.7466	0.00501771	0.156208
Bra020578.1	AT5G27730	-	unknown protein	A02	+	10	23.5663	0.00504236	0.156759
Bra028545.1	AT3G52990	-	pyruvate kinase,putative	A02	+	16	32.7703	0.00504947	0.156759
Bra012274.1	-	-	-	A07	+	2	7.85947	0.00505552	0.156759
Bra007748.1	AT2G30390	FC2,FC-II,ATFC-II	FC2 (FERROCHELATASE 2);ferrochelatase	A09	-	10	23.5591	0.00505562	0.156759
Bra018402.1	AT2G29320	-	tropinone reductase,putative / tropine dehydrogenase,putative	A05	-	4	12.8116	0.00506224	0.156808
Bra004387.1	AT1G69510	-	FUNCTIONS IN: molecular_function unknown;INVOLVED IN: biological_process unknown;LOCATED IN: cellular_component unknown;EXPRESSED IN: 23 plant structures;EXPRESSED DURING: 15 growth stages;CONTAINS InterPro DOMAIN/s: Lg106-like (InterPro:IPR012482);BEST Arabidopsis thaliana protein match is: unknown protein (TAIR:AT5G64130.1);Has 92 Blast hits to 92 proteins in 12 species: Archae - 0;Bacteria - 0…	A07	+	6	16.7147	0.00507385	0.157011
Bra006215.1	AT5G13800	-	hydrolase,alpha/beta fold family protein	A03	-	5	14.8219	0.00508532	0.157109
Bra032849.1	AT1G27760	SAT32,ATSAT32	interferon-related developmental regulator family protein / IFRD protein family	A09	-	13	28.243	0.00509654	0.157109
Bra032172.1	AT2G23350	PAB4,PABP4	PAB4 (POLY(A) BINDING PROTEIN 4);RNA binding / translation initiation factor	A04	+	8	20.2271	0.00509952	0.157109
Bra002999.1	AT5G54270	LHCB3,LHCB3*1	LHCB3 (LIGHT-HARVESTING CHLOROPHYLL B-BINDING PROTEIN 3);structural molecule	A10	+	3	10.5563	0.00510175	0.157109
Bra014273.1	AT1G51310	-	tRNA (5-methylaminomethyl-2-thiouridylate)-methyltransferase	A08	-	9	21.9012	0.0051023	0.157109
Bra007463.1	AT3G59600	NRPB8B,NRPD8B,NRPE8B	NRPB8B;DNA-directed RNA polymerase	A09	+	4	12.7897	0.00511412	0.157317
Bra013513.1	AT4G21210	ATRP1	ATRP1 (PPDK REGULATORY PROTEIN);phosphoprotein phosphatase/ protein kinase	A01	+	3	10.5473	0.00512491	0.157493
Bra014363.1	AT1G54290	-	eukaryotic translation initiation factor SUI1,putative	A08	-	4	12.7766	0.00514539	0.157967
Bra030853.1	AT1G55535	-	unknown protein	A08	+	5	14.7831	0.0051728	0.158619
Bra022459.1	AT3G19820	DWF1,DIM,EVE1,DIM1,CBB1	DWF1 (DWARF 1);calmodulin binding / catalytic	A05	+	2	7.8166	0.00517685	0.158619
Bra038762.1	AT4G21705	-	pentatricopeptide (PPR) repeat-containing protein	A03	-	2	7.81165	0.00519106	0.158717
Bra012668.1	AT4G17370	-	oxidoreductase family protein	A03	+	5	14.7739	0.0051938	0.158717
Bra037495.1	AT5G48300	ADG1,APS1	ADG1 (ADP GLUCOSE PYROPHOSPHORYLASE 1);glucose-1-phosphate adenylyltransferase	A06	+	9	21.8531	0.00519539	0.158717
Bra016330.1	AT1G23800	ALDH2B7,ALDH2B	ALDH2B7;3-chloroallyl aldehyde dehydrogenase/ aldehyde dehydrogenase (NAD)	A08	+	10	23.4438	0.00527299	0.16093
Bra002766.1	AT5G57050	ABI2	ABI2 (ABA INSENSITIVE 2);protein serine/threonine phosphatase	A10	+	4	12.7207	0.00528113	0.16102
Bra035784.1	AT3G20420	RTL2,ATRTL2	RTL2 (RNASE THREE-LIKE PROTEIN 2);double-stranded RNA binding / ribonuclease III	A05	+	4	12.7078	0.00531318	0.161838
Bra013167.1	AT2G07050	CAS1	CAS1 (cycloartenol synthase 1);cycloartenol synthase	A03	-	18	35.4926	0.00535703	0.162642
Bra017183.1	AT2G37480	-	unknown protein	A04	+	2	7.75333	0.00536135	0.162642
Bra015574.1	AT1G07320	RPL4	RPL4;poly(U) binding / structural constituent of ribosome	A10	-	2	7.75305	0.00536219	0.162642
Bra029862.1	AT3G10730	-	sad1/unc-84-like 2 family protein	A05	+	2	7.75263	0.00536345	0.162642
Bra011679.1	AT4G36390	-	radical SAM domain-containing protein / TRAM domain-containing protein	A01	+	3	10.4554	0.00536573	0.162642
Bra013176.1	Glycine-rich protein 3 [Source:Projected from Arabidopsis thaliana	UniProtKB/Swiss-Prot%3BAcc:Q9SL15]	Glycine-rich protein 3 [Source:Projected from Arabidopsis thaliana (AT2G05520) UniProtKB/Swiss-Prot%3BAcc:Q9SL15]	A03	-	2	7.73916	0.0054036	0.163453
Bra024670.1	AT4G30990	-	binding	A09	+	48	75.347	0.00540398	0.163453
Bra027340.1	AT3G14410	-	transporter-related	A05	+	7	18.3516	0.00541111	0.163453
Bra014720.1	AT3G55800	SBPASE	SBPASE (sedoheptulose-bisphosphatase);phosphoric ester hydrolase/ sedoheptulose-bisphosphatase	A04	-	7	18.3505	0.00541355	0.163453
Bra020599.1	AT5G27150	NHX1,ATNHX,AT-NHX1,ATNHX1	NHX1 (NA+/H+ EXCHANGER);protein binding / sodium ion transmembrane transporter/ sodium:hydrogen antiporter	A02	+	13	28.0592	0.00542276	0.163573
Bra029827.1	AT3G10260	-	reticulon family protein	A05	+	5	14.6726	0.00543063	0.163651
Bra030028.1	AT1G24330	-	armadillo/beta-catenin repeat family protein / U-box domain-containing family protein	A07	+	5	14.663	0.00545375	0.164188
Bra027936.1	AT1G56340	CRT1	CRT1 (CALRETICULIN 1);calcium ion binding / unfolded protein binding	A09	+	12	26.4964	0.0054714	0.164548
Bra031388.1	AT1G22370	AtUGT85A5	AtUGT85A5 (UDP-glucosyl transferase 85A5);glucuronosyltransferase/ transferase,transferring glycosyl groups	A05	+	2	7.71503	0.00547629	0.164548
Bra003137.1	AT3G53480	PDR9,ATPDR9,ABCG37	PDR9 (PLEIOTROPIC DRUG RESISTANCE 9);ATPase,coupled to transmembrane movement of substances	A07	+	22	41.0669	0.00550126	0.165139
Bra009006.1	AT5G10770	-	chloroplast nucleoid DNA-binding protein,putative	A10	+	8	20.0288	0.00550773	0.165173
Bra036845.1	AT3G50950	-	disease resistance protein (CC-NBS-LRR class),putative	A09	+	5	14.6331	0.00552604	0.165563
Bra017424.1	AT2G02080	AtIDD4	AtIDD4 (Arabidopsis thaliana Indeterminate(ID)-Domain 4);transcription factor	A09	+	2	7.69246	0.0055452	0.165977
Bra037696.1	AT2G43640	-	signal recognition particle 14 kDa family protein / SRP14 family protein	A04	-	3	10.3838	0.00556137	0.166301
Bra029006.1	AT5G54780	-	RAB GTPase activator	A03	+	10	23.2754	0.00560661	0.167399
Bra008893.1	AT5G12370	SEC10	SEC10 (EXOCYST COMPLEX COMPONENT SEC10)	A10	+	25	45.1388	0.00560889	0.167399
Bra007803.1	AT2G25310	-	carbohydrate binding	A09	+	7	18.2517	0.005633	0.167757
Bra030945.1	AT1G53310	ATPPC1	ATPPC1 (PHOSPHOENOLPYRUVATE CARBOXYLASE 1);catalytic/ phosphoenolpyruvate carboxylase	A08	+	9	21.6376	0.00563325	0.167757
Bra034453.1	-	-	-	A05	-	2	7.6628	0.00563709	0.167757
Bra002767.1	AT5G57040	-	lactoylglutathione lyase family protein / glyoxalase I family protein	A10	-	4	12.5692	0.00566712	0.16849
Bra037701.1	AT2G43560	-	immunophilin / FKBP-type peptidyl-prolyl cis-trans isomerase family protein	A04	-	6	16.4344	0.00570729	0.169522
Bra010469.1	AT4G25300	-	oxidoreductase,2OG-Fe(II) oxygenase family protein	A08	-	4	12.5503	0.00571727	0.16961
Bra023646.1	AT5G17930	-	binding / protein binding	A02	-	14	29.4105	0.00572202	0.16961
Bra032569.1	-	-	-	A09	+	5	14.552	0.00572665	0.16961
Bra038380.1	AT4G09580	-	INVOLVED IN: biological_process unknown;LOCATED IN: endoplasmic reticulum;EXPRESSED IN: 24 plant structures;EXPRESSED DURING: 13 growth stages;CONTAINS InterPro DOMAIN/s: SNARE associated Golgi protein (InterPro:IPR015414);BEST Arabidopsis thaliana protein match is: unknown protein (TAIR:AT1G71940.1);Has 2023 Blast hits to 2023 proteins in 496 species: Archae - 2;Bacteria - 1014;Metazoa - 198;Fun…	A09	-	4	12.5177	0.00580461	0.171756
Bra016329.1	AT1G23820	SPDS1	SPDS1 (spermidine synthase 1);spermidine synthase	A08	-	8	19.8753	0.0058455	0.172801
Bra010129.1	AT5G62890	-	permease,putative	A06	+	13	27.8153	0.00588662	0.173851
Bra022536.1	AT5G51120	PABN1,ATPABN1	PABN1 (POLYADENYLATE-BINDING PROTEIN 1);RNA binding / poly(A) binding / protein binding	A02	-	6	16.3519	0.0059079	0.174301
Bra040045.1	AT3G08020	-	protein binding / zinc ion binding	A01	+	11	24.7136	0.00591554	0.174301
Bra035531.1	AT5G35620	4E,LSP,EIF4E2	LSP1 (LOSS OF SUSCEPTIBILITY TO POTYVIRUS 1);RNA 7-methylguanosine cap binding / RNA binding / translation initiation factor	A08	+	5	14.4769	0.00591869	0.174301
Bra008474.1	AT1G80410	EMB2753	EMB2753 (EMBRYO DEFECTIVE 2753);binding	A02	+	33	55.5957	0.00599688	0.176437
Bra030661.1	AT1G06690	-	aldo/keto reductase family protein	A08	+	10	23.0851	0.00600804	0.176598
Bra031821.1	AT5G66740	-	unknown protein	A02	-	11	24.6668	0.00601423	0.176613
Bra032305.1	AT1G29320	-	transducin family protein / WD-40 repeat family protein	A09	-	13	27.7476	0.00602189	0.176671
Bra002913.1	-	-	-	A10	+	3	10.2138	0.00605476	0.177467
Bra027377.1	AT3G14050	RSH2,AT-RSH2,ATRSH2	RSH2 (RELA-SPOT HOMOLOG 2);GTP diphosphokinase	A05	+	6	16.28	0.00608839	0.178285
Bra035235.1	AT4G11290	-	peroxidase,putative	A08	-	4	12.3973	0.00613889	0.179594
Bra003263.1	AT3G57020	-	strictosidine synthase family protein	A07	-	3	10.183	0.00614889	0.179718
Bra023341.1	AT5G11770	-	NADH-ubiquinone oxidoreductase 20 kDa subunit,mitochondrial	A02	-	2	7.49935	0.00617214	0.180221
Bra015523.1	AT1G06730	-	pfkB-type carbohydrate kinase family protein	A10	-	5	14.3782	0.00618088	0.180221
Bra029493.1	AT4G04470	PMP22	PMP22	A09	+	6	16.243	0.00618351	0.180221
Bra023002.1	AT2G35155	-	catalytic	A03	-	7	18.0168	0.00619041	0.180253
Bra012624.1	AT4G18010	IP5PII,AT5PTASE2	AT5PTASE2 (MYO-INOSITOL POLYPHOSPHATE 5-PHOSPHATASE 2);inositol-polyphosphate 5-phosphatase	A03	-	9	21.3734	0.00621885	0.180766
Bra018197.1	AT3G46740	TOC75-III	TOC75-III (TRANSLOCON AT THE OUTER ENVELOPE MEMBRANE OF CHLOROPLASTS 75-III);P-P-bond-hydrolysis-driven protein transmembrane transporter	A06	+	7	18.005	0.00621968	0.180766
Bra002850.1	AT3G42860	-	zinc knuckle (CCHC-type) family protein	A10	+	3	10.1474	0.00625926	0.181591
Bra040068.1	AT4G32175	-	RNA binding	A08	-	8	19.6935	0.00627127	0.181591
Bra016053.1	AT1G72500	-	inter-alpha-trypsin inhibitor heavy chain-related	A07	-	12	26.0999	0.00627142	0.181591
Bra036899.1	AT4G14760	-	LOCATED IN: nucleus;EXPRESSED IN: 22 plant structures;EXPRESSED DURING: 13 growth stages;CONTAINS InterPro DOMAIN/s: Prefoldin (InterPro:IPR009053),KIP1-like (InterPro:IPR011684);BEST Arabidopsis thaliana protein match is: kinase interacting family protein (TAIR:AT3G22790.1);Has 167525 Blast hits to 63593 proteins in 2151 species: Archae - 1921;Bacteria - 21978;Metazoa - 82150;Fungi - 11567;Plant…	A01	-	3	10.1435	0.00627144	0.181591
Bra018714.1	AT1G48230	-	phosphate translocator-related	A06	-	9	21.3434	0.00628893	0.181688
Bra009771.1	AT5G24530	DMR6	DMR6 (DOWNY MILDEW RESISTANT 6);oxidoreductase/ oxidoreductase,acting on paired donors,with incorporation or reduction of molecular oxygen,2-oxoglutarate as one donor,and incorporation of one atom each of oxygen into both donors	A06	+	6	16.2017	0.00629108	0.181688
Bra004550.1	AT2G46270	GBF3	GBF3 (G-BOX BINDING FACTOR 3);sequence-specific DNA binding / transcription factor	A05	-	11	24.537	0.00629567	0.181688
Bra004418.1	AT2G48060	-	unknown protein	A05	+	21	39.1987	0.00629816	0.181688
Bra025037.1	AT5G46110	APE2,TPT	APE2 (ACCLIMATION OF PHOTOSYNTHESIS TO ENVIRONMENT 2);antiporter/ triose-phosphate transmembrane transporter	A06	-	12	26.0835	0.00630676	0.181767
Bra021334.1	AT1G54650	-	methyltransferase	A01	-	7	17.963	0.00632544	0.182136
Bra001245.1	AT3G07320	-	glycosyl hydrolase family 17 protein	A03	-	5	14.3196	0.00634194	0.182442
Bra022039.1	AT4G08450	-	disease resistance protein (TIR-NBS-LRR class),putative	A02	+	5	14.3068	0.00637756	0.183297
Bra023252.1	AT1G32230	RCD1,CEO,CEO1,ATP8	RCD1 (RADICAL-INDUCED CELL DEATH1);protein binding	A09	-	4	12.3132	0.00638383	0.183308
Bra010919.1	AT1G27752	-	FUNCTIONS IN: molecular_function unknown;INVOLVED IN: biological_process unknown;LOCATED IN: chloroplast;CONTAINS InterPro DOMAIN/s: Ubiquitin system component Cue (InterPro:IPR003892);Has 330 Blast hits to 312 proteins in 96 species: Archae - 0;Bacteria - 26;Metazoa - 143;Fungi - 77;Plants - 32;Viruses - 0;Other Eukaryotes - 52 (source: NCBI BLink).	A08	-	10	22.8846	0.00646077	0.185187
Bra026401.1	AT1G62680	-	LOCATED IN: chloroplast;EXPRESSED IN: shoot apex,leaf whorl,flower,seed;EXPRESSED DURING: F mature embryo stage,petal differentiation and expansion stage;CONTAINS InterPro DOMAIN/s: Pentatricopeptide repeat (InterPro:IPR002885);BEST Arabidopsis thaliana protein match is: pentatricopeptide (PPR) repeat-containing protein (TAIR:AT1G63130.1);Has 26421 Blast hits to 6237 proteins in 192 species: Arch…	A01	+	2	7.41696	0.00646119	0.185187
Bra031401.1	AT1G61740	-	unknown protein	A01	-	4	12.2619	0.00653779	0.18699
Bra007937.1	AT1G70700	JAZ9,TIFY7	TIFY7	A02	+	6	16.1093	0.00653887	0.18699
Bra024181.1	AT3G24430	HCF101	HCF101 (HIGH-CHLOROPHYLL-FLUORESCENCE 101);ATP binding	A03	-	23	41.8337	0.00654705	0.18699
Bra035279.1	AT4G10770	ATOPT7,OPT7	OPT7 (OLIGOPEPTIDE TRANSPORTER 7);oligopeptide transporter	A08	+	9	21.2332	0.0065532	0.18699
Bra000641.1	AT2G34210	-	structural constituent of ribosome / transcription elongation regulator/ transcription initiation factor	A03	-	22	40.4433	0.00656553	0.18699
Bra024118.1	AT4G29890	-	choline monooxygenase,putative (CMO-like)	A03	+	10	22.8391	0.0065679	0.18699
Bra009378.1	AT5G09320	VPS9B	VPS9B	A10	-	5	14.2363	0.00657791	0.18699
Bra011887.1	AT4G38890	-	dihydrouridine synthase family protein	A01	-	10	22.834	0.00658018	0.18699
Bra037433.1	AT5G49170	-	unknown protein	A06	-	2	7.38236	0.00658665	0.18699
Bra003034.1	AT5G53800	-	unknown protein	A10	+	8	19.5661	0.00658713	0.18699
Bra030756.1	AT1G09130	-	ATP-dependent Clp protease proteolytic subunit,putative	A08	+	9	21.2157	0.00659597	0.18699
Bra019562.1	AT3G48760	-	zinc finger (DHHC type) family protein	A06	-	7	17.857	0.00659959	0.18699
Bra037527.1	AT5G47830	-	unknown protein	A06	-	2	7.37809	0.00660232	0.18699
Bra029714.1	AT3G08740	-	elongation factor P (EF-P) family protein	A05	+	7	17.8493	0.00662009	0.187318
Bra037859.1	AT4G08390	SAPX	SAPX (STROMAL ASCORBATE PEROXIDASE);L-ascorbate peroxidase	A09	+	10	22.8132	0.00662983	0.187318
Bra025107.1	AT5G44740	POLH	POLH (Y-FAMILT DNA POLYMERASE H);DNA-directed DNA polymerase	A06	+	14	28.9598	0.00663242	0.187318
Bra017061.1	AT2G39660	BIK1	BIK1 (BOTRYTIS-INDUCED KINASE1);kinase	A04	+	5	14.2155	0.00663804	0.187318
Bra020188.1	AT5G22380	anac090	anac090 (Arabidopsis NAC domain containing protein 90);transcription factor	A02	-	3	10.0247	0.00665538	0.18759
Bra021653.1	AT2G30600	-	BTB/POZ domain-containing protein	A04	+	12	25.9222	0.00666511	0.18759
Bra005175.1	AT2G37660	-	binding / catalytic/ coenzyme binding	A05	+	6	16.0633	0.00666578	0.18759
Bra037844.1	AT5G67500	VDAC2,ATVDAC2	VDAC2 (VOLTAGE DEPENDENT ANION CHANNEL 2);voltage-gated anion channel	A09	-	6	16.0546	0.00668992	0.188029
Bra000773.1	AT4G12420	SKU5	SKU5;copper ion binding / oxidoreductase	A03	-	8	19.524	0.00669497	0.188029
Bra034897.1	AT4G12980	-	auxin-responsive protein,putative	A08	-	3	10.0114	0.00669955	0.188029
Bra025911.1	AT1G18390	-	ATP binding / kinase/ protein kinase/ protein serine/threonine kinase/ protein tyrosine kinase	A06	+	5	14.1903	0.00671192	0.188197
Bra026087.1	AT1G15980	NDF1	NDF1 (NDH-DEPENDENT CYCLIC ELECTRON FLOW 1)	A06	+	7	17.8127	0.00671765	0.188197
Bra008837.1	AT5G13310	-	unknown protein	A10	-	2	7.33689	0.00675538	0.189084
Bra014559.1	AT3G58680	MBF1B,ATMBF1B	MBF1B (MULTIPROTEIN BRIDGING FACTOR 1B);DNA binding / transcription coactivator	A04	-	4	12.1842	0.00677793	0.189412
Bra012411.1	AT1G27150	-	binding	A07	-	17	33.2821	0.00677932	0.189412
Bra010368.1	AT4G28440	-	DNA-binding protein-related	A08	-	2	7.32211	0.00681115	0.189997
Bra022264.1	AT3G17940	-	aldose 1-epimerase family protein	A05	+	5	14.1563	0.00681246	0.189997
Bra012267.1	AT1G21090	-	hydroxyproline-rich glycoprotein family protein	A07	-	4	12.1686	0.00682747	0.19004
Bra023388.1	AT5G13020	-	emsy N terminus domain-containing protein / ENT domain-containing protein	A02	-	14	28.8705	0.00682839	0.19004
Bra006363.1	AT5G16650	-	DNAJ heat shock N-terminal domain-containing protein	A03	-	7	17.7687	0.00683709	0.19004
Bra013297.1	AT4G18340	-	glycosyl hydrolase family 17 protein	A01	-	4	12.1651	0.00683849	0.19004
Bra009441.1	AT5G04590	SIR	SIR;sulfite reductase (ferredoxin)/ sulfite reductase	A10	-	8	19.462	0.0068569	0.190382
Bra003344.1	AT3G58580	-	hydrolase	A07	-	10	22.7135	0.00687285	0.190654
Bra029586.1	AT3G06540	-	GDP dissociation inhibitor family protein / Rab GTPase activator family protein	A05	+	9	21.0989	0.00688934	0.190853
Bra015225.1	AT2G15580	-	zinc finger (C3HC4-type RING finger) family protein	A10	-	3	9.9547	0.0068923	0.190853
Bra039150.1	AT3G02080	-	40S ribosomal protein S19 (RPS19A)	A05	+	4	12.141	0.00691548	0.191324
Bra019302.1	AT4G23460	-	beta-adaptin,putative	A03	-	15	30.2991	0.00693966	0.191765
Bra015464.1	AT1G05910	-	cell division cycle protein 48-related / CDC48-related	A10	-	10	22.6845	0.00694522	0.191765
Bra032010.1	AT3G03190	ATGSTF11,ATGSTF6	ATGSTF11 (GLUTATHIONE S-TRANSFERASE F11);glutathione transferase	A02	+	3	9.93805	0.00694993	0.191765
Bra038646.1	AT5G63570	GSA1	GSA1 (GLUTAMATE-1-SEMIALDEHYDE-2%2C1-AMINOMUTASE);glutamate-1-semialdehyde 2%2C1-aminomutase	A06	+	3	9.92957	0.00697944	0.192408
Bra021387.1	AT3G62290	ATARFA1E	ATARFA1E (ADP-ribosylation factor A1E);GTP binding / phospholipase activator/ protein binding	A01	-	5	14.0944	0.00699978	0.192798
Bra012850.1	AT3G51550	FER	FER (FERONIA);kinase/ protein kinase	A03	-	2	7.26416	0.00703442	0.193581
Bra024250.1	AT5G63950	CHR24	CHR24 (chromatin remodeling 24);ATP binding / DNA binding / helicase/ nucleic acid binding	A06	-	23	41.5691	0.00704568	0.193719
Bra039181.1	AT3G02570	MEE31,PMI1	MEE31 (MATERNAL EFFECT EMBRYO ARREST 31);mannose-6-phosphate isomerase	A05	-	5	14.0674	0.00708291	0.19457
Bra007103.1	AT2G39130	-	amino acid transporter family protein	A09	-	10	22.6267	0.00709138	0.194631
Bra026615.1	AT2G02100	LCR69,PDF2.2	LCR69 (LOW-MOLECULAR-WEIGHT CYSTEINE-RICH 69);peptidase inhibitor	A02	-	2	7.24651	0.00710391	0.194737
Bra028485.1	AT5G41080	-	glycerophosphoryl diester phosphodiesterase family protein	A02	+	7	17.6695	0.00711355	0.194737
Bra034145.1	AT3G10770	-	nucleic acid binding	A01	+	3	9.89002	0.00711884	0.194737
Bra012244.1	AT1G20696	HMGB3,NFD3,NFD03	HMGB3 (HIGH MOBILITY GROUP B 3);DNA binding / chromatin binding / structural constituent of chromatin / transcription factor	A07	-	5	14.0554	0.00712032	0.194737
Bra012523.1	AT4G20010	PTAC9,OSB2	PTAC9 (PLASTID TRANSCRIPTIONALLY ACTIVE 9);single-stranded DNA binding	A03	+	7	17.6646	0.00712727	0.194756
Bra016385.1	AT3G08505	-	zinc finger (CCCH-type/C3HC4-type RING finger) family protein	A08	+	4	12.0673	0.00715624	0.195349
Bra005918.1	AT5G06860	PGIP1,ATPGIP1	PGIP1 (POLYGALACTURONASE INHIBITING PROTEIN 1);protein binding	A03	+	2	7.232	0.00716155	0.195349
Bra037520.1	AT5G47910	RBOHD,ATRBOHD	RBOHD (RESPIRATORY BURST OXIDASE HOMOLOGUE D);NAD(P)H oxidase	A06	+	8	19.3426	0.0071792	0.195658
Bra005404.1	AT2G34640	PTAC12	PTAC12 (PLASTID TRANSCRIPTIONALLY ACTIVE12)	A05	+	8	19.327	0.00722233	0.196661
Bra019524.1	AT3G48100	ARR5,ATRR2,IBC6	ARR5 (ARABIDOPSIS RESPONSE REGULATOR 5);transcription regulator/ two-component response regulator	A06	+	3	9.85806	0.00723352	0.19669
Bra008785.1	AT5G14030	-	translocon-associated protein beta (TRAPB) family protein	A10	-	5	14.0186	0.00723604	0.19669
Bra035786.1	AT3G20390	-	endoribonuclease L-PSP family protein	A05	+	6	15.8459	0.00729818	0.198206
Bra012743.1	AT4G16110	ARR2	ARR2 (ARABIDOPSIS RESPONSE REGULATOR 2);transcription factor/ two-component response regulator	A03	+	6	15.8304	0.00734537	0.199313
Bra014907.1	AT1G31320	LBD4	LBD4 (LOB DOMAIN-CONTAINING PROTEIN 4)	A07	-	2	7.18414	0.00735506	0.199402
Bra002045.1	AT3G11510	-	40S ribosomal protein S14 (RPS14B)	A10	+	6	15.8226	0.00736922	0.199611
Bra017082.1	AT2G39310	JAL22	JAL22 (JACALIN-RELATED LECTIN 22)	A04	-	5	13.9703	0.00739041	0.199872
Bra035926.1	AT5G61510	-	NADP-dependent oxidoreductase,putative	A09	-	4	11.9959	0.00739717	0.199872
Bra003959.1	AT1G70260	-	nodulin MtN21 family protein	A07	+	7	17.5696	0.00740288	0.199872
Bra034553.1	AT4G33220	PME44,ATPME44	enzyme inhibitor/ pectinesterase	A08	-	5	13.9659	0.00740458	0.199872
Bra008846.1	AT5G13220	JAZ10,TIFY9,JAS1	JAZ10 (JASMONATE-ZIM-DOMAIN PROTEIN 10)	A10	-	5	13.9597	0.00742468	0.200047
Bra000693.1	AT4G09810	-	transporter-related	A03	-	5	13.9571	0.00743312	0.200047
Bra020681.1	AT5G48760	-	60S ribosomal protein L13A (RPL13aD)	A02	-	4	11.985	0.00743467	0.200047
Bra010082.1	AT5G62430	CDF1	CDF1 (CYCLING DOF FACTOR 1);DNA binding / protein binding / transcription factor	A06	-	2	7.16432	0.0074368	0.200047
Bra000667.1	AT4G09020	ATISA3,ISA3	ISA3 (ISOAMYLASE 3);alpha-amylase/ isoamylase	A03	+	22	39.9953	0.00744659	0.200137
Bra025917.1	AT1G18300	atnudt4	atnudt4 (Arabidopsis thaliana Nudix hydrolase homolog 4);hydrolase	A06	+	2	7.15752	0.00746504	0.200459
Bra019213.1	AT4G24680	-	FUNCTIONS IN: molecular_function unknown;EXPRESSED IN: 26 plant structures;EXPRESSED DURING: 14 growth stages;CONTAINS InterPro DOMAIN/s: BAT2,N-terminal (InterPro:IPR009738);Has 6700 Blast hits to 3976 proteins in 401 species: Archae - 2;Bacteria - 590;Metazoa - 2482;Fungi - 634;Plants - 203;Viruses - 19;Other Eukaryotes - 2770 (source: NCBI BLink).	A03	+	9	20.8749	0.00748715	0.200879
Bra017909.1	AT1G21370	-	unknown protein	A06	+	3	9.77801	0.00752892	0.201826
Bra010952.1	AT1G27350	-	FUNCTIONS IN: molecular_function unknown;INVOLVED IN: biological_process unknown;LOCATED IN: cellular_component unknown;CONTAINS InterPro DOMAIN/s: Ribosome associated membrane RAMP4 (InterPro:IPR010580);BEST Arabidopsis thaliana protein match is: unknown protein (TAIR:AT1G27330.1);Has 267 Blast hits to 267 proteins in 83 species: Archae - 0;Bacteria - 0;Metazoa - 183;Fungi - 0;Plants - 55;Viruse…	A08	-	2	7.139	0.00754252	0.20195
Bra012673.1	AT4G17215	-	unknown protein	A03	+	2	7.13804	0.00754656	0.20195
Bra007819.1	AT2G25080	ATGPX1	ATGPX1 (GLUTATHIONE PEROXIDASE 1);glutathione peroxidase	A09	-	6	15.7457	0.00760894	0.203444
Bra009866.1	AT5G25880	ATNADP-ME3	ATNADP-ME3 (NADP-malic enzyme 3);malate dehydrogenase (oxaloacetate-decarboxylating) (NADP+)/ malic enzyme/ oxidoreductase,acting on NADH or NADPH,NAD or NADP as acceptor	A06	+	19	35.7218	0.00765804	0.204581
Bra031583.1	AT1G07670	ATECA4,ECA4	calcium-transporting ATPase	A09	-	8	19.1639	0.00768926	0.205238
Bra016559.1	AT1G18335	-	GCN5-related N-acetyltransferase (GNAT) family protein	A08	+	7	17.4639	0.00772133	0.205793
Bra006211.1	AT5G13710	SMT1,CPH	SMT1 (STEROL METHYLTRANSFERASE 1);sterol 24-C-methyltransferase	A03	-	13	27.0015	0.00772328	0.205793
Bra016134.1	AT1G71500	-	Rieske (2Fe-2S) domain-containing protein	A07	+	8	19.1386	0.00776409	0.206452
Bra032210.1	AT1G45050	ATUBC2-1,UBC15	ATUBC2-1;ubiquitin-protein ligase	A05	-	6	15.6963	0.00776685	0.206452
Bra018941.1	AT1G52030	MBP2,MBP1.2,F-ATMBP	MBP2 (MYROSINASE-BINDING PROTEIN 2);sugar binding / thioglucosidase binding	A06	+	4	11.8905	0.00776795	0.206452
Bra027624.1	AT1G63160	-	replication factor C 40 kDa,putative	A09	+	7	17.4358	0.00780814	0.207322
Bra006094.1	AT5G11250	-	disease resistance protein (TIR-NBS-LRR class),putative	A03	-	4	11.877	0.00781657	0.207322
Bra015463.1	AT1G05890	-	zinc finger protein-related	A10	-	15	29.9226	0.00782144	0.207322
Bra000277.1	AT2G42880	ATMPK20	ATMPK20;MAP kinase	A03	-	9	20.7551	0.00782737	0.207322
Bra029615.1	AT3G07020	-	UDP-glucose:sterol glucosyltransferase (UGT80A2)	A05	+	13	26.9449	0.00786969	0.208231
Bra038519.1	AT2G22480	PFK5	PFK5 (PHOSPHOFRUCTOKINASE 5);6-phosphofructokinase	A09	-	12	25.4313	0.00787908	0.208231
Bra004232.1	AT1G65030	-	transducin family protein / WD-40 repeat family protein	A07	-	3	9.6864	0.00788179	0.208231
Bra019693.1	AT1G13990	-	unknown protein	A06	+	5	13.8197	0.00789347	0.208308
Bra028906.1	AT5G01530	-	chlorophyll A-B binding protein CP29 (LHCB4)	A02	-	2	7.05643	0.00789813	0.208308
Bra003758.1	AT1G75330	OTC	OTC (ORNITHINE CARBAMOYLTRANSFERASE);amino acid binding / carboxyl- or carbamoyltransferase/ ornithine carbamoyltransferase	A07	+	5	13.8083	0.00793254	0.209038
Bra014848.1	AT3G54020	-	phosphatidic acid phosphatase-related / PAP2-related	A04	-	11	23.8737	0.00794274	0.20913
Bra024282.1	AT5G64290	DCT,DIT2.1	DIT2.1 (DICARBOXYLATE TRANSPORT 2.1);oxoglutarate:malate antiporter	A06	-	4	11.8385	0.00795731	0.209336
Bra009716.1	AT5G23940	EMB3009	EMB3009 (embryo defective 3009);transferase/ transferase,transferring acyl groups other than amino-acyl groups	A06	-	2	7.03036	0.00801391	0.210508
Bra026018.1	AT1G16890	UBC36,UBC13B	ubiquitin-conjugating enzyme,putative	A06	-	8	19.0534	0.00802182	0.210508
Bra017897.1	AT1G59820	ALA3	ALA3 (Aminophospholipid ATPase3);ATPase,coupled to transmembrane movement of ions,phosphorylative mechanism / phospholipid transporter	A03	-	31	51.7905	0.00802221	0.210508
Bra002287.1	AT5G20260	-	catalytic	A10	+	4	11.8177	0.00803435	0.210649
Bra030547.1	AT1G65660	SMP1	SMP1 (SWELLMAP 1);nucleic acid binding / single-stranded RNA binding	A08	+	10	22.2741	0.00804974	0.210714
Bra024936.1	AT5G47540	-	binding	A06	+	10	22.2739	0.0080504	0.210714
Bra010748.1	AT4G14160	-	transport protein,putative	A08	+	13	26.87	0.00806715	0.210872
Bra023265.1	AT1G32410	-	vacuolar protein sorting 55 family protein / VPS55 family protein	A09	-	4	11.8082	0.00807001	0.210872
Bra017264.1	AT4G33050	EDA39	EDA39 (embryo sac development arrest 39);calmodulin binding	A04	+	7	17.3477	0.00808679	0.211015
Bra007683.1	AT3G62550	-	universal stress protein (USP) family protein	A09	+	4	11.8031	0.00808904	0.211015
Bra016743.1	AT1G13080	CYP71B2	CYP71B2 (CYTOCHROME P450 71B2);electron carrier/ heme binding / iron ion binding / monooxygenase/ oxygen binding	A08	-	2	7.00638	0.00812199	0.211501
Bra000159.1	AT2G40010	-	60S acidic ribosomal protein P0 (RPP0A)	A03	-	4	11.7937	0.00812418	0.211501
Bra004961.1	AT2G46090	-	diacylglycerol kinase family protein	A05	+	11	23.8075	0.00812812	0.211501
Bra029334.1	AT5G61130	PDCB1	PDCB1 (PLASMODESMATA CALLOSE-BINDING PROTEIN 1);callose binding / polysaccharide binding	A02	-	4	11.7823	0.00816737	0.212343
Bra010500.1	AT4G24190	SHD,HSP90.7	SHD (SHEPHERD);ATP binding / unfolded protein binding	A08	+	15	29.7831	0.00817414	0.212343
Bra006572.1	AT5G20720	CPN20,CPN10,CHCPN10,ATCPN21,CPN21	CPN20 (CHAPERONIN 20);calmodulin binding	A03	+	5	13.7367	0.00818476	0.212441
Bra008583.1	AT5G16910	ATCSLD2,CSLD2	CSLD2 (CELLULOSE-SYNTHASE LIKE D2);cellulose synthase/ transferase,transferring glycosyl groups	A10	-	3	9.60796	0.00819705	0.212463
Bra004060.1	AT3G45140	LOX2,ATLOX2	LOX2 (LIPOXYGENASE 2);lipoxygenase	A07	+	7	17.313	0.00819928	0.212463
Bra002629.1	AT5G58650	PSY1	PSY1 (plant peptide containing sulfated tyrosine 1)	A10	-	2	6.98746	0.00820825	0.212519
Bra007565.1	AT3G60820	PBF1	PBF1;peptidase/ threonine-type endopeptidase	A09	-	7	17.3057	0.00822307	0.212651
Bra024366.1	AT5G65210	TGA1	TGA1;DNA binding / calmodulin binding / transcription factor	A06	+	8	18.9873	0.00822707	0.212651
Bra010954.1	AT1G27290	-	unknown protein	A08	-	2	6.97244	0.00827745	0.213669
Bra009806.1	AT5G24970	-	ABC1 family protein	A06	-	19	35.4514	0.00828908	0.213669
Bra035709.1	AT2G28310	-	unknown protein	A04	+	11	23.7508	0.00829013	0.213669
Bra026690.1	AT1G17080	-	unknown protein	A09	+	4	11.7482	0.00829749	0.213669
Bra012828.1	AT3G51910	AT-HSFA7A,HSFA7A	AT-HSFA7A;DNA binding / transcription factor	A03	+	2	6.96694	0.00830294	0.213669
Bra035439.1	AT1G58380	XW6	XW6;structural constituent of ribosome	A01	-	2	6.96591	0.00830772	0.213669
Bra012164.1	AT5G67420	LBD37	LBD37 (LOB DOMAIN-CONTAINING PROTEIN 37)	A07	+	2	6.96356	0.00831865	0.213695
Bra028975.1	AT4G26670	-	mitochondrial import inner membrane translocase subunit Tim17/Tim22/Tim23 family protein	A03	+	5	13.6978	0.00832464	0.213695
Bra029936.1	AT3G49160	-	pyruvate kinase family protein	A01	-	5	13.6953	0.00833383	0.213695
Bra037448.1	AT1G58602	-	ATP binding / protein binding	A06	+	6	15.5228	0.00834701	0.213695
Bra034026.1	AT1G67080	ABA4	ABA4 (abscisic acid (ABA)-deficient 4);intramolecular oxidoreductase	A02	-	5	13.6913	0.00834827	0.213695
Bra004229.1	AT1G67510	-	leucine-rich repeat family protein	A07	-	2	6.95572	0.00835514	0.213695
Bra027212.1	AT3G16740	-	F-box family protein	A05	-	2	6.95536	0.00835687	0.213695
Bra013678.1	AT4G23180	CRK10,RLK4	CRK10 (CYSTEINE-RICH RLK10);ATP binding / kinase/ protein kinase/ protein serine/threonine kinase/ protein tyrosine kinase	A01	+	7	17.2598	0.00837436	0.213862
Bra039419.1	AT3G05620	-	pectinesterase family protein	A05	+	2	6.95101	0.00837718	0.213862
Bra037331.1	AT4G00330	CRCK2	CRCK2;ATP binding / kinase/ protein kinase/ protein serine/threonine kinase	A09	+	6	15.5075	0.00840046	0.214281
Bra023559.1	AT5G16290	-	acetolactate synthase small subunit,putative	A02	+	12	25.2347	0.00842188	0.214638
Bra034061.1	AT3G09270	ATGSTU8	ATGSTU8 (GLUTATHIONE S-TRANSFERASE TAU 8);glutathione transferase	A01	+	2	6.93896	0.0084338	0.214638
Bra027153.1	AT3G62290	ATARFA1E	ATARFA1E (ADP-ribosylation factor A1E);GTP binding / phospholipase activator/ protein binding	A09	+	6	15.4971	0.00843666	0.214638
Bra039777.1	AT3G53260	PAL2,ATPAL2	PAL2;phenylalanine ammonia-lyase	A04	+	3	9.54905	0.00844208	0.214638
Bra015989.1	AT1G73480	-	hydrolase,alpha/beta fold family protein	A07	+	7	17.2322	0.00846656	0.215084
Bra020344.1	AT5G58920	-	unknown protein	A02	-	2	6.92452	0.00850218	0.215812
Bra035176.1	AT1G80500	-	FUNCTIONS IN: molecular_function unknown;INVOLVED IN: transport,ER to Golgi vesicle-mediated transport;LOCATED IN: intracellular;EXPRESSED IN: 24 plant structures;EXPRESSED DURING: 15 growth stages;CONTAINS InterPro DOMAIN/s: Sedlin (InterPro:IPR006722),Longin-like (InterPro:IPR011012);BEST Arabidopsis thaliana protein match is: unknown protein (TAIR:AT2G20930.1);Has 437 Blast hits to 435 protein…	A07	-	3	9.52511	0.00854374	0.21669
Bra008899.1	AT5G12320	-	ankyrin repeat family protein	A10	-	6	15.4586	0.00857234	0.217238
Bra030644.1	AT1G06240	-	unknown protein	A08	-	7	17.1988	0.00857984	0.217251
Bra010109.1	AT5G62650	-	unknown protein	A06	-	9	20.4999	0.0086016	0.217625
Bra013615.1	AT4G22370	-	unknown protein	A01	-	5	13.6135	0.0086366	0.218031
Bra015668.1	AT1G77490	TAPX	TAPX (THYLAKOIDAL ASCORBATE PEROXIDASE);L-ascorbate peroxidase	A07	+	10	22.0767	0.00863897	0.218031
Bra040179.1	AT4G17750	HSF1,HSFA1A,ATHSF1,ATHSFA1A	HSF1 (HEAT SHOCK FACTOR 1);DNA binding / protein binding / transcription factor	A01	-	2	6.89505	0.00864346	0.218031
Bra034863.1	AT3G11170	FAD7,FADD	FAD7 (FATTY ACID DESATURASE 7);omega-3 fatty acid desaturase	A05	-	8	18.8555	0.00865218	0.218031
Bra000225.1	AT2G41330	-	glutaredoxin family protein	A03	+	2	6.89314	0.00865274	0.218031
Bra018045.1	AT3G48610	-	phosphoesterase family protein	A06	+	3	9.49808	0.00865999	0.218037
Bra014036.1	AT1G45130	BGAL5	BGAL5 (beta-galactosidase 5);beta-galactosidase/ catalytic/ cation binding	A08	-	16	31.0213	0.00872753	0.219559
Bra012065.1	AT5G66300	ANAC105,VND3,NAC105	NAC105 (NAC DOMAIN CONTAINING PROTEIN 105);transcription factor	A07	-	3	9.4727	0.00877058	0.220381
Bra017960.1	AT3G49720	-	unknown protein	A06	+	7	17.1423	0.00877437	0.220381
Bra007877.1	AT1G66580	-	60S ribosomal protein L10 (RPL10C)	A02	+	3	9.46763	0.00879288	0.220667
Bra007633.1	AT2G46620	-	AAA-type ATPase family protein	A09	-	5	13.5694	0.00880396	0.220746
Bra005474.1	AT2G33750	ATPUP2	ATPUP2;purine transmembrane transporter	A05	+	2	6.8609	0.00881022	0.220746
Bra038698.1	AT5G06780	-	emsy N terminus domain-containing protein / ENT domain-containing protein	A01	+	10	22.0123	0.00884007	0.221315
Bra036460.1	AT2G20290	XIG,ATXIG	XIG;motor/ protein binding	A07	+	38	60.4164	0.00887915	0.222115
Bra025234.1	AT3G26900	-	shikimate kinase family protein	A06	+	10	21.9962	0.00889099	0.222232
Bra034377.1	AT2G27920	SCPL51	SCPL51 (SERINE CARBOXYPEPTIDASE-LIKE 51);serine-type carboxypeptidase	A04	-	13	26.5668	0.00891569	0.22267
Bra039218.1	AT2G23820	-	metal-dependent phosphohydrolase HD domain-containing protein	A09	-	7	17.089	0.00896174	0.22364
Bra004854.1	AT2G44660	-	transferase,transferring glycosyl groups / transferase,transferring hexosyl groups	A05	-	3	9.4237	0.00898812	0.224119
Bra031796.1	AT5G56700	-	F-box protein-related	A09	+	6	15.3379	0.00901203	0.224535
Bra006904.1	AT3G52150	-	RNA recognition motif (RRM)-containing protein	A09	+	4	11.5645	0.00903405	0.22482
Bra011366.1	AT3G44340	CEF	CEF (clone eighty-four);protein binding / transporter/ zinc ion binding	A01	-	24	42.0166	0.0090382	0.22482
Bra027927.1	AT1G56690	-	pentatricopeptide (PPR) repeat-containing protein	A09	-	7	17.0656	0.00904519	0.22482
Bra009417.1	AT5G04885	-	glycosyl hydrolase family 3 protein	A10	-	13	26.5161	0.00906583	0.224998
Bra004389.1	AT1G69523	-	UbiE/COQ5 methyltransferase family protein	A07	+	6	15.3232	0.00906685	0.224998
Bra022406.1	AT3G19260	LAG1 HOMOLOG 2,LOH2	LOH2 (LAG ONE HOMOLOGUE 2)	A05	+	6	15.3213	0.00907429	0.225003
Bra025381.1	AT3G29180	-	unknown protein	A06	-	8	18.7236	0.00909866	0.225336
Bra017475.1	AT5G47620	-	heterogeneous nuclear ribonucleoprotein,putative / hnRNP,putative	A09	+	3	9.39754	0.00910647	0.225336
Bra031170.1	AT4G38790	-	ER lumen protein retaining receptor family protein	A09	-	6	15.3119	0.00910946	0.225336
Bra004159.1	AT1G66330	-	senescence-associated family protein	A07	-	12	24.9952	0.00913147	0.225701
Bra016165.1	AT1G71020	-	armadillo/beta-catenin repeat family protein / U-box domain-containing protein	A07	-	3	9.3867	0.00915596	0.226126
Bra005721.1	AT5G02390	-	unknown protein	A03	-	4	11.5308	0.00917622	0.226446
Bra028949.1	AT5G55990	CBL2,ATCBL2	CBL2 (CALCINEURIN B-LIKE 2);calcium ion binding	A03	-	7	17.0246	0.0091932	0.226685
Bra020544.1	AT5G26180	-	NOL1/NOP2/sun family protein	A02	+	13	26.4586	0.00923848	0.227301
Bra018876.1	AT1G50900	-	FUNCTIONS IN: molecular_function unknown;INVOLVED IN: biological_process unknown;LOCATED IN: chloroplast,chloroplast stroma;EXPRESSED IN: 22 plant structures;EXPRESSED DURING: 13 growth stages;CONTAINS InterPro DOMAIN/s: Ankyrin (InterPro:IPR002110);Has 30 Blast hits to 30 proteins in 12 species: Archae - 0;Bacteria - 0;Metazoa - 0;Fungi - 0;Plants - 27;Viruses - 0;Other Eukaryotes - 3 (source: N…	A06	-	2	6.77507	0.009244	0.227301
Bra025568.1	AT5G40490	-	RNA recognition motif (RRM)-containing protein	A04	+	9	20.303	0.0092485	0.227301
Bra005169.1	AT2G37700	-	catalytic/ iron ion binding / oxidoreductase	A05	+	9	20.3016	0.00925343	0.227301
Bra028953.1	AT5G55940	emb2731	emb2731 (embryo defective 2731)	A03	+	5	13.4548	0.00925473	0.227301
Bra005644.1	AT1G05710	-	ethylene-responsive protein,putative	A05	+	5	13.4524	0.00926432	0.227356
Bra016204.1	AT1G70550	-	unknown protein	A07	+	7	16.9999	0.00928367	0.227651
Bra013069.1	AT2G16430	PAP10,ATPAP10	PAP10 (PURPLE ACID PHOSPHATASE 10);acid phosphatase/ protein serine/threonine phosphatase	A03	-	7	16.9958	0.00929872	0.227838
Bra010041.1	AT5G61900	BON1,CPN1,BON	BON1 (BONZAI 1);calcium-dependent phospholipid binding	A06	-	16	30.8127	0.00930594	0.227838
Bra004499.1	AT2G46890	-	oxidoreductase,acting on the CH-CH group of donors	A05	+	3	9.3512	0.00931992	0.228
Bra012279.1	AT1G21380	-	VHS domain-containing protein / GAT domain-containing protein	A07	+	9	20.2756	0.00934202	0.228328
Bra028419.1	AT4G14365	-	zinc finger (C3HC4-type RING finger) family protein / ankyrin repeat family protein	A02	+	9	20.2739	0.009348	0.228328
Bra004963.1	AT2G40410	-	Ca(2+)-dependent nuclease,putative	A05	-	7	16.9786	0.00936223	0.228496
Bra029355.1	AT5G23010	MAM1,IMS3	MAM1 (METHYLTHIOALKYLMALATE SYNTHASE 1);2-isopropylmalate synthase/ methylthioalkylmalate synthase	A02	-	9	20.2612	0.00939169	0.228991
Bra006772.1	AT5G58330	-	malate dehydrogenase (NADP),chloroplast,putative	A03	+	12	24.91	0.00939726	0.228991
Bra000796.1	AT4G04540	-	protein kinase family protein	A03	+	6	15.2319	0.00941601	0.229268
Bra017693.1	AT4G35090	CAT2	CAT2 (CATALASE 2);catalase	A03	-	8	18.6256	0.00944454	0.229783
Bra022734.1	AT5G54600	-	50S ribosomal protein L24,chloroplast (CL24)	A02	-	4	11.4584	0.00948853	0.230672
Bra027180.1	AT3G16250	NDF4	NDF4 (NDH-DEPENDENT CYCLIC ELECTRON FLOW 1);electron carrier/ iron-sulfur cluster binding	A05	+	6	15.2075	0.00951154	0.231019
Bra027607.1	AT5G45380	ATDUR3,DUR3	sodium:solute symporter family protein	A09	-	10	21.8015	0.00952976	0.231019
Bra015182.1	AT2G06025	-	GCN5-related N-acetyltransferase (GNAT) family protein	A07	-	8	18.6013	0.00953257	0.231019
Bra032613.1	AT1G02270	-	endonuclease/exonuclease/phosphatase family protein / calcium-binding EF hand family protein	A09	+	10	21.7999	0.0095351	0.231019
Bra000523.1	AT2G27140	-	heat shock family protein	A03	+	2	6.71884	0.00953997	0.231019
Bra031045.1	AT1G18730	NDF6	NDF6 (NDH DEPENDENT FLOW 6)	A09	-	6	15.1932	0.00956813	0.23152
Bra025276.1	AT5G40580	PBB2	PBB2;endopeptidase/ peptidase/ threonine-type endopeptidase	A06	-	11	23.3268	0.00960261	0.232174
Bra005645.1	AT2G31725	-	unknown protein	A05	+	3	9.28803	0.00961902	0.23239
Bra003855.1	bonsai [Source:TAIR%3BAcc:AT1G73177]	-	bonsai [Source:TAIR%3BAcc:AT1G73177](projected from arabidopsis_thaliana%2CAT1G73177)	A07	+	3	9.28599	0.00962881	0.232397
Bra003031.1	-	-	-	A10	-	5	13.3624	0.00963426	0.232397
Bra037781.1	AT5G64560	-	magnesium transporter CorA-like family protein (MRS2-2)	A09	-	8	18.565	0.00966482	0.232764
Bra014540.1	AT3G59480	-	pfkB-type carbohydrate kinase family protein	A04	-	4	11.4181	0.00966726	0.232764
Bra024038.1	AT4G30850	HHP2	HHP2 (HEPTAHELICAL TRANSMEMBRANE PROTEIN2);receptor	A03	-	4	11.417	0.00967195	0.232764
Bra007699.1	AT4G27830	BGLU10	BGLU10 (BETA GLUCOSIDASE 10);catalytic/ cation binding / hydrolase,hydrolyzing O-glycosyl compounds	A09	+	13	26.3063	0.00971169	0.233539
Bra038541.1	AT2G22170	-	lipid-associated family protein	A09	+	2	6.68054	0.00974711	0.234169
Bra031557.1	AT1G07210	-	30S ribosomal protein S18 family	A09	-	5	13.3343	0.00975294	0.234169
Bra019839.1	AT1G11680	CYP51G1,EMB1738,CYP51A2,CYP51	CYP51G1 (CYTOCHROME P450 51G1);oxygen binding / sterol 14-demethylase	A06	+	2	6.67744	0.00976406	0.234254
Bra006206.1	AT5G13550	SULTR4%3B1	SULTR4%3B1;sulfate transmembrane transporter	A03	-	12	24.78	0.00981713	0.235346
Bra035773.1	AT3G20540	POLGAMMA1	POLGAMMA1 (polymerase gamma 1);3'-5' exonuclease/ DNA binding / DNA-directed DNA polymerase/ nucleic acid binding	A05	-	12	24.7674	0.00985879	0.236162
Bra003237.1	AT3G56340	-	40S ribosomal protein S26 (RPS26C)	A07	-	6	15.1072	0.00991389	0.237262
Bra017489.1	AT5G47370	HAT2	HAT2;DNA binding / transcription factor/ transcription repressor	A09	+	4	11.3623	0.00991996	0.237262
Bra018223.1	AT3G46130	MYB111,ATMYB48,PFG3,ATMYB48-3	MYB111 (MYB DOMAIN PROTEIN 111);DNA binding / transcription factor	A06	-	3	9.2154	0.00997475	0.238389
Bra037751.1	AT5G63700	-	zinc finger (C3HC4 type RING finger) family protein	A09	-	8	18.4724	0.0100112	0.239008
Bra022027.1	AT5G46280	MCM3	DNA replication licensing factor,putative	A02	-	15	29.1361	0.010016	0.239008
Bra009702.1	AT5G23690	-	polynucleotide adenylyltransferase family protein	A06	+	14	27.6671	0.0100677	0.240056
Bra007656.1	AT3G62040	-	catalytic/ hydrolase	A09	-	5	13.2539	0.0100994	0.240627
Bra005027.1	AT2G39660	BIK1	BIK1 (BOTRYTIS-INDUCED KINASE1);kinase	A05	-	6	15.0524	0.0101406	0.241424
Bra023912.1	AT3G20920	-	translocation protein-related	A01	+	6	15.0494	0.0101535	0.241546
Bra025968.1	AT1G17510	-	unknown protein	A06	-	2	6.60481	0.0101703	0.241701
Bra010125.1	AT5G62820	-	integral membrane protein,putative	A06	-	3	9.17553	0.0101756	0.241701
Bra024086.1	AT4G30310	-	ribitol kinase,putative	A03	+	15	29.0766	0.0102038	0.242186
Bra027909.1	AT2G13650	GONST1	GONST1 (Golgi Nucleotide Sugar Transporter 1);GDP-mannose transmembrane transporter/ nucleotide-sugar transmembrane transporter	A09	-	8	18.4194	0.0102146	0.242258
Bra008645.1	AT5G16110	-	unknown protein	A10	+	3	9.1662	0.0102232	0.242276
Bra018715.1	AT1G63770	-	peptidase M1 family protein	A06	-	30	49.4884	0.0102478	0.24255
Bra029738.1	AT3G08980	-	signal peptidase I family protein	A05	-	9	20.0212	0.0102562	0.24255
Bra001500.1	AT3G13330	-	binding	A03	-	35	55.9513	0.0102583	0.24255
Bra013729.1	-	-	-	A01	-	2	6.58815	0.010266	0.24255
Bra026495.1	AT5G23490	-	unknown protein	A01	+	19	34.7043	0.0102957	0.243069
Bra016173.1	AT1G70940	PIN3,ATPIN3	PIN3 (PIN-FORMED 3);auxin:hydrogen symporter/ transporter	A07	+	6	15.0103	0.0103183	0.243416
Bra026272.1	AT4G28250	ATEXPB3,EXPB3,ATHEXP BETA 1.6	ATEXPB3 (ARABIDOPSIS THALIANA EXPANSIN B3)	A01	-	4	11.2692	0.0103557	0.243989
Bra018755.1	AT1G04945	-	FUNCTIONS IN: molecular_function unknown;INVOLVED IN: biological_process unknown;LOCATED IN: cellular_component unknown;EXPRESSED IN: 14 plant structures;EXPRESSED DURING: 6 growth stages;CONTAINS InterPro DOMAIN/s: Zinc finger,HIT-type (InterPro:IPR007529);Has 296 Blast hits to 294 proteins in 138 species: Archae - 0;Bacteria - 0;Metazoa - 111;Fungi - 94;Plants - 29;Viruses - 0;Other Eukaryotes …	A06	-	5	13.1957	0.0103583	0.243989
Bra007924.1	AT1G70560	WEI8,TAA1,SAV3	TAA1 (TRYPTOPHAN AMINOTRANSFERASE OF ARABIDOPSIS 1);L-alanine:2-oxoglutarate aminotransferase/ L-glutamine:2-oxoglutarate aminotransferase/ L-leucine:2-oxoglutarate aminotransferase/ L-methionine:2-oxoglutarate aminotransferase/ L-phenylalanine:2-oxoglut	A02	+	5	13.1926	0.010372	0.244014
Bra032579.1	AT1G02890	-	AAA-type ATPase family protein	A09	+	25	42.8395	0.0103751	0.244014
Bra015530.1	AT2G30570	PSBW	PSBW (PHOTOSYSTEM II REACTION CENTER W)	A10	-	2	6.5606	0.0104261	0.245029
Bra024474.1	AT2G18300	-	basic helix-loop-helix (bHLH) family protein	A06	+	6	14.9824	0.010438	0.245122
Bra016314.1	AT1G27170	-	ATP binding / protein binding / transmembrane receptor	A08	+	5	13.1748	0.0104527	0.245282
Bra018065.1	AT3G48360	BT2,ATBT2	BT2 (BTB AND TAZ DOMAIN PROTEIN 2);protein binding / transcription factor/ transcription regulator	A06	+	5	13.1711	0.0104692	0.245485
Bra001470.1	AT3G12780	PGK1	PGK1 (PHOSPHOGLYCERATE KINASE 1);phosphoglycerate kinase	A03	-	6	14.9708	0.0104877	0.245734
Bra027170.1	AT3G16350	-	myb family transcription factor	A05	-	3	9.11359	0.0104956	0.245734
Bra011573.1	AT2G16660	-	nodulin family protein	A01	+	3	9.112	0.010504	0.245745
Bra025584.1	AT5G40370	-	glutaredoxin,putative	A04	-	4	11.2339	0.0105258	0.245809
Bra031486.1	AT1G60750	-	oxidoreductase	A01	-	5	13.1582	0.0105283	0.245809
Bra038707.1	AT3G12280	RBR1,RBR,RB,ATRBR1	RBR1 (RETINOBLASTOMA-RELATED 1);transcription factor binding	A01	+	17	31.8267	0.0105321	0.245809
Bra024885.1	AT5G50550	-	WD-40 repeat family protein / St12p protein,putative	A06	+	9	19.947	0.0105384	0.245809
Bra038651.1	AT5G63640	-	VHS domain-containing protein / GAT domain-containing protein	A06	+	9	19.9447	0.0105474	0.245834
Bra021904.1	AT2G34350	-	nodulin-related	A04	+	3	9.0966	0.0105852	0.24643
Bra036839.1	AT3G51030	ATTRX1,ATTRX H1	ATTRX1;oxidoreductase,acting on sulfur group of donors,disulfide as acceptor	A09	-	3	9.09511	0.0105931	0.24643
Bra007399.1	AT3G58510	-	DEAD box RNA helicase,putative (RH11)	A09	+	6	14.9452	0.010599	0.24643
Bra018009.1	AT3G49080	-	ribosomal protein S9 family protein	A06	+	4	11.2178	0.0106047	0.24643
Bra034194.1	AT4G05460	-	F-box family protein (FBL20)	A01	+	4	11.216	0.0106133	0.246442
Bra010590.1	AT2G14080	-	disease resistance protein (TIR-NBS-LRR class),putative	A08	+	3	9.08983	0.0106211	0.246442
Bra011327.1	AT4G32180	ATPANK2	ATPANK2 (PANTOTHENATE KINASE 2);pantothenate kinase	A01	+	21	37.3441	0.0106383	0.246631
Bra008067.1	AT1G73030	VPS46.2	VPS46.2	A02	+	3	9.08509	0.0106463	0.246631
Bra010126.1	AT5G62840	-	phosphoglycerate/bisphosphoglycerate mutase family protein	A06	-	4	11.2079	0.010653	0.246631
Bra026023.1	AT1G16840	-	unknown protein	A06	-	2	6.51248	0.010712	0.247812
Bra000335.1	AT2G43950	OEP37,ATOEP37	OEP37;ion channel	A03	-	6	14.9095	0.0107563	0.248652
Bra000619.1	AT5G50320	ELO3,HAG3,HAC8	ELO3 (ELONGATA 3);histone acetyltransferase	A03	-	9	19.8872	0.0107714	0.248815
Bra021032.1	AT4G17870	-	FUNCTIONS IN: molecular_function unknown;INVOLVED IN: biological_process unknown;LOCATED IN: cellular_component unknown;EXPRESSED IN: 25 plant structures;EXPRESSED DURING: 15 growth stages;CONTAINS InterPro DOMAIN/s: Streptomyces cyclase/dehydrase (InterPro:IPR005031);BEST Arabidopsis thaliana protein match is: unknown protein (TAIR:AT5G46790.1);Has 177 Blast hits to 177 proteins in 18 species: A…	A08	+	2	6.50132	0.0107794	0.248815
Bra006447.1	AT5G18230	-	transcription regulator NOT2/NOT3/NOT5 family protein	A03	-	10	21.4425	0.0108243	0.249666
Bra025494.1	AT5G41750	-	disease resistance protein (TIR-NBS-LRR class),putative	A04	+	6	14.8883	0.0108503	0.250081
Bra037232.1	AT2G18193	-	AAA-type ATPase family protein	A09	-	3	9.04161	0.0108803	0.250468
Bra022420.1	AT3G19420	ATPEN2	ATPEN2 (ARABIDOPSIS THALIANA PTEN 2);phosphatase/ protein tyrosine phosphatase	A05	-	13	25.9576	0.0108833	0.250468
Bra006235.1	AT5G14060	CARAB-AK-LYS	CARAB-AK-LYS;amino acid binding / aspartate kinase	A03	+	13	25.9408	0.010943	0.251656
Bra004553.1	AT2G46240	BAG6,ATBAG6	BAG6 (BCL-2-ASSOCIATED ATHANOGENE 6);calmodulin binding / protein binding	A05	-	2	6.47261	0.010955	0.251745
Bra023842.1	AT3G22240	-	unknown protein	A01	+	4	11.1443	0.0109707	0.25192
Bra006052.1	AT5G10160	-	beta-hydroxyacyl-ACP dehydratase,putative	A03	+	4	11.1426	0.0109793	0.251922
Bra018693.1	AT1G07650	-	leucine-rich repeat transmembrane protein kinase,putative	A06	-	23	39.9402	0.010987	0.251922
Bra002456.1	AT5G60710	-	zinc finger (C3HC4-type RING finger) family protein	A10	-	2	6.46594	0.0109961	0.251946
Bra033537.1	AT4G16146	-	FUNCTIONS IN: molecular_function unknown;INVOLVED IN: biological_process unknown;LOCATED IN: cellular_component unknown;EXPRESSED IN: 24 plant structures;EXPRESSED DURING: 13 growth stages;CONTAINS InterPro DOMAIN/s: Lg106-like (InterPro:IPR012482);BEST Arabidopsis thaliana protein match is: unknown protein (TAIR:AT1G69510.3);Has 94 Blast hits to 94 proteins in 12 species: Archae - 0;Bacteria - 0…	A01	+	5	13.051	0.0110294	0.252523
Bra024000.1	AT4G31530	-	binding / catalytic	A03	+	8	18.2061	0.0110741	0.25336
Bra026021.1	AT1G16860	-	merozoite surface protein-related	A06	+	4	11.1171	0.0111091	0.253956
Bra000246.1	AT2G41945	-	unknown protein	A03	-	6	14.8294	0.0111165	0.253956
Bra039494.1	AT5G36170	HCF109,ATPRFB	HCF109 (HIGH CHLOROPHYLL FLUORESCENT 109);translation release factor/ translation release factor,codon specific	A05	-	7	16.5404	0.0111293	0.254061
Bra013809.1	AT4G24510	CER2,VC2,VC-2	CER2 (ECERIFERUM 2);transferase/ transferase,transferring acyl groups other than amino-acyl groups	A01	+	2	6.43671	0.0111785	0.254677
Bra036702.1	AT2G19790	-	clathrin adaptor complex small chain family protein	A09	+	4	11.103	0.0111819	0.254677
Bra010816.1	AT1G29720	-	protein kinase family protein	A08	+	15	28.7811	0.0111863	0.254677
Bra004555.1	AT2G46225	ABIL1	ABIL1 (Abi-1-like 1)	A05	-	9	19.783	0.0111891	0.254677
Bra022933.1	AT2G33255	-	catalytic/ hydrolase/ phosphoglycolate phosphatase	A03	+	5	13.014	0.0112077	0.254914
Bra031090.1	AT2G19590	ACO1	ACO1 (ACC OXIDASE 1);1-aminocyclopropane-1-carboxylate oxidase	A09	+	3	8.98006	0.0112203	0.255014
Bra014549.1	AT3G59020	-	binding / protein transporter	A04	+	22	38.5055	0.011238	0.25523
Bra031649.1	AT1G08930	ERD6	ERD6 (EARLY RESPONSE TO DEHYDRATION 6);carbohydrate transmembrane transporter/ sugar transmembrane transporter/ sugar:hydrogen symporter	A09	-	18	32.9872	0.0113138	0.256764
Bra038360.1	AT1G68670	-	myb family transcription factor	A02	+	4	11.0699	0.0113537	0.25748
Bra013362.1	AT4G18920	-	unknown protein	A01	+	8	18.1281	0.0114051	0.258457
Bra009539.1	AT5G03280	EIN2,PIR2,CKR1,ERA3,ORE3,ORE2,ATEIN2	EIN2 (ETHYLENE INSENSITIVE 2);transporter	A10	-	7	16.4608	0.0114831	0.259997
Bra029176.1	AT5G51380	-	F-box family protein	A03	-	2	6.38795	0.0114898	0.259997
Bra025715.1	AT1G19200	-	senescence-associated protein-related	A06	-	2	6.3662	0.0116314	0.262795
Bra024702.1	AT1G26630	FBR12,ATELF5A-2,ELF5A-2	FBR12 (FUMONISIN B1-RESISTANT12);translation initiation factor	A09	+	5	12.9257	0.0116444	0.262795
Bra011416.1	AT4G33130	-	FUNCTIONS IN: molecular_function unknown;INVOLVED IN: biological_process unknown;LOCATED IN: chloroplast;EXPRESSED IN: 9 plant structures;EXPRESSED DURING: 6 growth stages;BEST Arabidopsis thaliana protein match is: transcription factor (TAIR:AT3G13000.2);Has 77 Blast hits to 77 proteins in 7 species: Archae - 0;Bacteria - 0;Metazoa - 0;Fungi - 0;Plants - 77;Viruses - 0;Other Eukaryotes - 0 (sour…	A01	+	6	14.7165	0.011645	0.262795
Bra017992.1	AT3G49310	-	LOCATED IN: endomembrane system;EXPRESSED IN: 22 plant structures;EXPRESSED DURING: 13 growth stages;CONTAINS InterPro DOMAIN/s: Protein of unknown function DUF791 (InterPro:IPR008509),Major facilitator superfamily,general substrate transporter (InterPro:IPR016196);BEST Arabidopsis thaliana protein match is: unknown protein (TAIR:AT4G27720.1);Has 550 Blast hits to 545 proteins in 201 species: Arc…	A06	+	7	16.4246	0.0116478	0.262795
Bra030670.1	AT1G07080	-	gamma interferon responsive lysosomal thiol reductase family protein / GILT family protein	A08	-	5	12.9223	0.0116619	0.262795
Bra020603.1	AT5G27970	-	binding	A02	-	45	67.9777	0.0116663	0.262795
Bra026100.1	AT1G15810	-	ribosomal protein S15 family protein	A06	+	5	12.9201	0.0116726	0.262795
Bra038236.1	AT5G50960	NBP35	NBP35 (NUCLEOTIDE BINDING PROTEIN 35);iron-sulfur cluster binding / nucleotide binding / protein homodimerization	A01	-	8	18.0561	0.0117195	0.263491
Bra029074.1	AT5G53330	-	FUNCTIONS IN: molecular_function unknown;INVOLVED IN: biological_process unknown;LOCATED IN: cellular_component unknown;EXPRESSED IN: 21 plant structures;EXPRESSED DURING: 13 growth stages;CONTAINS InterPro DOMAIN/s: Ubiquitin-associated/translation elongation factor EF1B,N-terminal,eukaryote (InterPro:IPR015940);Has 28 Blast hits to 28 proteins in 11 species: Archae - 0;Bacteria - 0;Metazoa - 11…	A03	-	5	12.9078	0.0117354	0.263491
Bra013043.1	AT2G16890	-	UDP-glucoronosyl/UDP-glucosyl transferase family protein	A03	+	2	6.35029	0.0117362	0.263491
Bra012064.1	AT5G66350	SHI	SHI (SHORT INTERNODES);protein binding / protein heterodimerization/ transcription factor	A07	-	2	6.3501	0.0117375	0.263491
Bra037657.1	AT2G44350	ATCS,CSY4	ATCS;ATP binding / ATP citrate synthase/ citrate (SI)-synthase	A04	+	19	34.2428	0.0117533	0.26351
Bra034164.1	AT3G11080	AtRLP35	AtRLP35 (Receptor Like Protein 35);kinase/ protein binding	A01	-	3	8.88691	0.0117553	0.26351
Bra035787.1	AT3G20370	-	meprin and TRAF homology domain-containing protein / MATH domain-containing protein	A05	-	6	14.6841	0.0118007	0.264338
Bra001350.1	AT3G08650	-	metal transporter family protein	A03	+	5	12.8812	0.011871	0.265699
Bra005816.1	AT5G04740	-	ACT domain-containing protein	A03	-	10	21.1791	0.0118786	0.265699
Bra039457.1	AT3G05165	-	sugar transporter,putative	A05	+	18	32.81	0.011913	0.266277
Bra039055.1	AT3G28415	-	P-glycoprotein,putative	A09	-	13	25.6642	0.0119707	0.26729
Bra000609.1	AT5G50090	-	unknown protein	A03	+	3	8.84978	0.0119755	0.26729
Bra017179.1	AT2G37550	ASP1,AGD7	AGD7;ARF GTPase activator/ DNA binding / zinc ion binding	A04	-	5	12.8468	0.0120493	0.268612
Bra016579.1	AT1G73230	-	nascent polypeptide-associated complex (NAC) domain-containing protein	A08	+	9	19.5789	0.012052	0.268612
Bra026229.1	AT1G30690	-	SEC14 cytosolic factor family protein / phosphoglyceride transfer family protein	A01	-	4	10.9381	0.0120656	0.268721
Bra013792.1	AT4G24330	-	unknown protein	A01	-	3	8.82881	0.0121017	0.269333
Bra003858.1	AT1G73080	PEPR1	PEPR1 (PEP1 receptor 1);ATP binding / kinase/ protein binding / protein serine/threonine kinase	A07	-	2	6.29353	0.012118	0.269501
Bra024776.1	AT2G03390	-	uvrB/uvrC motif-containing protein	A06	+	8	17.9632	0.0121371	0.269734
Bra033401.1	AT1G03470	-	kinase interacting family protein	A10	+	2	6.27913	0.0122168	0.271311
Bra015636.1	AT1G78060	-	glycosyl hydrolase family 3 protein	A07	-	5	12.8128	0.0122276	0.271357
Bra038829.1	AT2G18900	-	transducin family protein / WD-40 repeat family protein	A07	+	18	32.7074	0.0122732	0.272174
Bra004998.1	AT2G39960	-	microsomal signal peptidase 25 kDa subunit,putative (SPC25)	A05	+	5	12.7988	0.0123017	0.272612
Bra005336.1	AT2G35510	SRO1	SRO1 (SIMILAR TO RCD ONE 1);NAD+ ADP-ribosyltransferase	A05	+	6	14.58	0.0123161	0.272737
Bra038299.1	AT3G45090	-	2-phosphoglycerate kinase-related	A06	+	7	16.2783	0.0123358	0.272979
Bra011500.1	AT4G34150	-	C2 domain-containing protein	A01	-	7	16.2722	0.0123651	0.273432
Bra003288.1	AT3G57550	AGK2,GK-2	AGK2 (GUANYLATE KINASE);guanylate kinase	A07	+	13	25.5522	0.0124122	0.274123
Bra013479.1	AT4G20870	FAH2,ATFAH2	FAH2 (FATTY ACID HYDROXYLASE 2);catalytic/ fatty acid alpha-hydroxylase	A01	-	6	14.5579	0.012428	0.274123
Bra026360.1	AT5G54430	ATPHOS32,PHOS32	universal stress protein (USP) family protein	A01	-	2	6.24835	0.0124309	0.274123
Bra024156.1	-	-	-	A03	+	2	6.24824	0.0124316	0.274123
Bra011168.1	AT4G30160	VLN4,ATVLN4	VLN4 (ARABIDOPSIS THALIANA VILLIN 4);actin binding	A01	-	21	36.7584	0.0125073	0.275595
Bra038763.1	AT4G21680	-	proton-dependent oligopeptide transport (POT) family protein	A03	-	4	10.8567	0.0125265	0.275712
Bra005735.1	AT5G03300	ADK2	ADK2 (ADENOSINE KINASE 2);adenosine kinase/ copper ion binding / kinase	A03	-	10	21.0272	0.0125304	0.275712
Bra039730.1	AT4G14615	-	unknown protein	A08	+	2	6.21731	0.0126507	0.278163
Bra030763.1	AT1G09210	-	calreticulin 2 (CRT2)	A08	+	16	29.797	0.0126747	0.278486
Bra016454.1	AT1G20770	-	unknown protein	A08	+	6	14.5083	0.0126833	0.278486
Bra017044.1	AT2G39940	COI1	COI1 (CORONATINE INSENSITIVE 1);protein binding / ubiquitin-protein ligase	A04	-	3	8.72682	0.0127349	0.279421
Bra012371.1	AT1G23310	GGT1,AOAT1	GGT1 (GLUTAMATE:GLYOXYLATE AMINOTRANSFERASE);L-alanine:2-oxoglutarate aminotransferase/ glycine:2-oxoglutarate aminotransferase	A07	+	12	23.9933	0.0127614	0.279773
Bra040115.1	AT3G04920	-	40S ribosomal protein S24 (RPS24A)	A01	+	5	12.7118	0.0127733	0.279773
Bra015200.1	AT5G51230	EMF2,VEF2,CYR1	EMF2 (EMBRYONIC FLOWER 2);DNA binding / transcription factor	A10	-	21	36.6804	0.012778	0.279773
Bra030355.1	AT5G39210	CRR7	CRR7 (CHLORORESPIRATORY REDUCTION 7)	A04	+	5	12.7074	0.0127974	0.279848
Bra037241.1	AT2G18030	-	peptide methionine sulfoxide reductase family protein	A09	+	4	10.8099	0.0127994	0.279848
Bra023130.1	AT1G30755	-	unknown protein	A09	+	12	23.9799	0.0128184	0.280067
Bra033311.1	AT1G02280	TOC33,ATTOC33,PPI1	TOC33 (TRANSLOCON AT THE OUTER ENVELOPE MEMBRANE OF CHLOROPLASTS 33);GTP binding / GTPase/ protein binding	A10	+	7	16.1761	0.0128395	0.280074
Bra027243.1	AT3G15450	-	unknown protein	A05	-	2	6.19092	0.0128408	0.280074
Bra024534.1	AT1G22730	-	MA3 domain-containing protein	A09	-	3	8.70892	0.0128494	0.280074
Bra032552.1	AT1G03270	-	FUNCTIONS IN: molecular_function unknown;INVOLVED IN: biological_process unknown;LOCATED IN: endomembrane system;EXPRESSED IN: 21 plant structures;EXPRESSED DURING: 14 growth stages;CONTAINS InterPro DOMAIN/s: Protein of unknown function DUF21 (InterPro:IPR002550),Cystathionine beta-synthase,core (InterPro:IPR000644);BEST Arabidopsis thaliana protein match is: unknown protein (TAIR:AT4G14240.1);H…	A09	-	13	25.4437	0.0128548	0.280074
Bra036917.1	AT4G14950	-	unknown protein	A01	-	8	17.8066	0.0128736	0.280286
Bra027778.1	AT1G63880	-	disease resistance protein (TIR-NBS-LRR class),putative	A09	-	4	10.7942	0.0128921	0.280494
Bra009900.1	AT5G26742	emb1138	emb1138 (embryo defective 1138);ATP binding / ATP-dependent helicase/ RNA binding / helicase/ nucleic acid binding / zinc ion binding	A06	-	10	20.9325	0.0129534	0.28163
Bra029902.1	AT3G48530	KING1	KING1 (SNF1-RELATED PROTEIN KINASE REGULATORY SUBUNIT GAMMA 1)	A01	+	6	14.4521	0.012979	0.281722
Bra034824.1	AT3G11630	-	2-cys peroxiredoxin,chloroplast (BAS1)	A05	-	6	14.4506	0.0129866	0.281722
Bra037348.1	AT4G00585	-	unknown protein	A09	+	2	6.1703	0.0129912	0.281722
Bra020461.1	AT5G57180	CIA2	CIA2 (CHLOROPLAST IMPORT APPARATUS 2);transcription regulator	A02	-	3	8.68655	0.0129939	0.281722
Bra012676.1	AT4G17090	CT-BMY,BAM3,BMY8	CT-BMY (CHLOROPLAST BETA-AMYLASE);beta-amylase	A03	-	4	10.7739	0.0130132	0.281785
Bra017602.1	AT4G19110	-	protein kinase,putative	A09	-	13	25.4053	0.013015	0.281785
Bra003164.1	AT3G54000	-	unknown protein	A07	+	5	12.6633	0.0130436	0.282209
Bra022866.1	AT2G31800	-	ankyrin protein kinase,putative	A03	-	10	20.908	0.0130651	0.282477
Bra040512.1	AT3G01390	VMA10,AVMA10	VMA10 (VACUOLAR MEMBRANE ATPASE 10);hydrogen ion transporting ATP synthase,rotational mechanism	A01	+	3	8.67265	0.0130845	0.282555
Bra010351.1	AT4G28730	-	glutaredoxin family protein	A08	-	5	12.6556	0.0130869	0.282555
Bra007459.1	AT3G59550	SYN3,ATRAD21.2,ATSYN3	SYN3	A09	+	12	23.914	0.0131006	0.282655
Bra015003.1	AT3G24210	-	ankyrin repeat family protein	A07	-	11	22.418	0.0131112	0.282686
Bra027293.1	AT3G14940	ATPPC3	ATPPC3 (PHOSPHOENOLPYRUVATE CARBOXYLASE 3);phosphoenolpyruvate carboxylase	A05	-	9	19.3421	0.0131333	0.282968
Bra019826.1	AT1G13340	-	unknown protein	A06	+	3	8.66179	0.0131558	0.283183
Bra022236.1	AT3G17730	anac057	anac057 (Arabidopsis NAC domain containing protein 57);transcription factor	A05	-	3	8.66091	0.0131616	0.283183
Bra011030.1	AT2G20580	RPN1A,ATRPN1A	RPN1A (26S PROTEASOME REGULATORY SUBUNIT S2 1A);binding / enzyme regulator	A01	+	23	39.2561	0.0131879	0.283495
Bra032085.1	AT2G24550	-	unknown protein	A04	-	2	6.14287	0.0131943	0.283495
Bra030153.1	AT1G29630	-	DNA binding / catalytic/ nuclease	A07	-	12	23.8844	0.0132295	0.284054
Bra024643.1	AT1G24180	IAR4	IAR4;oxidoreductase,acting on the aldehyde or oxo group of donors,disulfide as acceptor / pyruvate dehydrogenase (acetyl-transferring)	A09	+	8	17.7272	0.0132633	0.284421
Bra008688.1	AT5G38280	PR5K	PR5K;kinase/ transmembrane receptor protein serine/threonine kinase	A10	-	2	6.13278	0.0132698	0.284421
Bra029430.1	AT4G12000	-	INVOLVED IN: response to oxidative stress;EXPRESSED IN: 22 plant structures;EXPRESSED DURING: 13 growth stages;CONTAINS InterPro DOMAIN/s: SNARE associated Golgi protein (InterPro:IPR015414);BEST Arabidopsis thaliana protein match is: unknown protein (TAIR:AT4G22850.1);Has 1153 Blast hits to 1150 proteins in 277 species: Archae - 2;Bacteria - 485;Metazoa - 104;Fungi - 24;Plants - 140;Viruses - 0;…	A09	+	4	10.7308	0.013274	0.284421
Bra028525.1	AT5G42080	ADL1,ADL1A,AG68,DRP1A,RSW9	ADL1 (ARABIDOPSIS DYNAMIN-LIKE PROTEIN);GTP binding / GTPase/ protein binding	A02	-	16	29.6301	0.0133276	0.285361
Bra012675.1	AT4G17100	-	unknown protein	A03	-	7	16.079	0.0133363	0.285361
Bra000458.1	AT2G47710	-	universal stress protein (USP) family protein	A03	-	4	10.7114	0.0133934	0.286343
Bra009521.1	AT5G03650	SBE2.2	SBE2.2 (starch branching enzyme 2.2);1%2C4-alpha-glucan branching enzyme	A10	-	22	37.8554	0.0134006	0.286343
Bra034167.1	AT3G11150	-	unknown protein	A01	+	3	8.62125	0.0134252	0.286671
Bra026427.1	AT4G26510	-	ATP binding / kinase/ phosphotransferase,alcohol group as acceptor / uracil phosphoribosyltransferase	A01	+	14	26.7522	0.0134495	0.286994
Bra008891.1	AT5G12390	FIS1B	FIS1B (FISSION 1B);binding	A10	+	5	12.5859	0.0134871	0.287407
Bra010644.1	AT4G39950	CYP79B2	CYP79B2;electron carrier/ heme binding / iron ion binding / monooxygenase/ oxygen binding	A08	-	2	6.10371	0.0134899	0.287407
Bra017410.1	AT2G02760	ATUBC2,UBC2	ATUBC2 (UBIQUITING-CONJUGATING ENZYME 2);ubiquitin-protein ligase	A09	-	5	12.5842	0.0134966	0.287407
Bra017545.1	AT4G18100	-	60S ribosomal protein L32 (RPL32A)	A09	-	2	6.10118	0.0135092	0.287477
Bra004715.1	AT2G42840	PDF1	PDF1 (PROTODERMAL FACTOR 1)	A05	+	3	8.60393	0.0135419	0.287977
Bra014390.1	AT3G62830	UXS2,ATUXS2,AUD1	AUD1;UDP-glucuronate decarboxylase/ catalytic/ dTDP-glucose 4%2C6-dehydratase	A04	-	7	16.0364	0.0135597	0.288157
Bra034095.1	AT1G74670	-	gibberellin-responsive protein,putative	A01	-	4	10.6785	0.0135976	0.288745
Bra010483.1	AT5G50250	-	31 kDa ribonucleoprotein,chloroplast,putative / RNA-binding protein RNP-T,putative / RNA-binding protein 1/2/3,putative / RNA-binding protein cp31,putative	A08	+	4	10.6761	0.0136124	0.288745
Bra018826.1	AT1G50020	-	unknown protein	A06	+	4	10.6756	0.0136161	0.288745
Bra017271.1	AT3G52490	-	heat shock protein-related	A04	-	3	8.59177	0.0136245	0.288745
Bra007860.1	AT2G24360	-	serine/threonine/tyrosine kinase,putative	A09	+	2	6.08345	0.0136454	0.288991
Bra031838.1	AT5G67470	-	formin homology 2 domain-containing protein / FH2 domain-containing protein	A02	-	4	10.6687	0.0136588	0.289013
Bra022376.1	AT3G18990	VRN1,REM39	VRN1 (REDUCED VERNALIZATION RESPONSE 1);transcription repressor	A05	+	3	8.58583	0.0136651	0.289013
Bra011819.1	AT4G39980	DHS1	DHS1 (3-DEOXY-D-ARABINO-HEPTULOSONATE 7-PHOSPHATE SYNTHASE 1);3-deoxy-7-phosphoheptulonate synthase	A01	+	5	12.5532	0.0136786	0.289103
Bra020061.1	AT5G19770	TUA3	TUA3;structural constituent of cytoskeleton	A02	-	5	12.5461	0.0137201	0.289772
Bra032721.1	-	-	-	A04	-	3	8.5765	0.013729	0.289772
Bra039953.1	AT3G22425	IGPD	IGPD;imidazoleglycerol-phosphate dehydratase	A05	-	8	17.6291	0.0137602	0.290145
Bra016459.1	AT1G20620	CAT3,SEN2,ATCAT3	CAT3 (CATALASE 3);catalase	A08	-	8	17.6281	0.0137653	0.290145
Bra010253.1	AT4G31130	-	unknown protein	A08	+	3	8.56511	0.0138074	0.290675
Bra007881.1	AT1G69780	ATHB13	ATHB13;DNA binding / sequence-specific DNA binding / transcription factor	A02	+	3	8.56395	0.0138154	0.290675
Bra035054.1	AT1G78630	emb1473	emb1473 (embryo defective 1473);structural constituent of ribosome	A07	+	4	10.6427	0.0138236	0.290675
Bra027784.1	AT1G64680	-	unknown protein	A09	+	4	10.642	0.0138279	0.290675
Bra021298.1	AT3G18170	-	transferase,transferring glycosyl groups	A01	-	3	8.55646	0.0138672	0.291305
Bra014744.1	AT3G55440	ATCTIMC,TPI	TPI (TRIOSEPHOSPHATE ISOMERASE);triose-phosphate isomerase	A04	-	9	19.185	0.0139012	0.291822
Bra008117.1	AT1G73980	-	phosphoribulokinase/uridine kinase family protein	A02	-	13	25.1916	0.0139405	0.292204
Bra035704.1	AT2G28380	DRB2	DRB2 (DSRNA-BINDING PROTEIN 2);double-stranded RNA binding	A04	-	3	8.5456	0.0139427	0.292204
Bra028773.1	AT5G05060	-	FUNCTIONS IN: molecular_function unknown;INVOLVED IN: biological_process unknown;LOCATED IN: cellular_component unknown;EXPRESSED IN: male gametophyte,cultured cell,pollen tube;EXPRESSED DURING: L mature pollen stage,M germinated pollen stage;CONTAINS InterPro DOMAIN/s: Cystatin-related,plant (InterPro:IPR006525);BEST Arabidopsis thaliana protein match is: unknown protein (TAIR:AT5G05040.1);Has 4…	A02	+	3	8.5444	0.0139511	0.292204
Bra011792.1	AT4G37870	PCK1,PEPCK	PCK1 (PHOSPHOENOLPYRUVATE CARBOXYKINASE 1);ATP binding / phosphoenolpyruvate carboxykinase (ATP)/ phosphoenolpyruvate carboxykinase/ purine nucleotide binding	A01	+	9	19.1707	0.0139731	0.292204
Bra016532.1	AT1G18950	-	aminoacyl-tRNA synthetase family	A08	-	12	23.7177	0.0139774	0.292204
Bra024967.1	AT5G47050	-	protein binding / zinc ion binding	A06	-	2	6.04053	0.0139811	0.292204
Bra032664.1	AT1G02080	-	transcriptional regulator-related	A09	+	48	70.7974	0.0139864	0.292204
Bra033711.1	AT5G44000	-	glutathione S-transferase C-terminal domain-containing protein	A06	+	3	8.53743	0.0139998	0.292204
Bra009292.1	AT5G07080	-	transferase family protein	A10	-	2	6.03764	0.014004	0.292204
Bra028600.1	AT5G10130	-	pollen Ole e 1 allergen and extensin family protein	A02	+	2	6.03295	0.0140413	0.292784
Bra001094.1	AT3G03960	-	chaperonin,putative	A03	+	13	25.1661	0.014055	0.29281
Bra012430.1	AT1G27050	ATHB54	ATHB54 (ARABIDOPSIS THALIANA HOMEOBOX PROTEIN 54);nucleic acid binding / transcription factor	A07	+	2	6.03042	0.0140614	0.29281
Bra000708.1	AT4G10340	LHCB5	LHCB5 (LIGHT HARVESTING COMPLEX OF PHOTOSYSTEM II 5);chlorophyll binding	A03	+	6	14.2504	0.0140948	0.29331
Bra032672.1	AT4G12800	PSAL	PSAL (photosystem I subunit L)	A04	-	2	6.0216	0.0141319	0.293706
Bra034413.1	AT1G35580	CINV1	CINV1 (cytosolic invertase 1);beta-fructofuranosidase	A05	+	5	12.4774	0.0141328	0.293706
Bra009330.1	AT5G08230	-	PWWP domain-containing protein	A10	-	11	22.1914	0.0141584	0.29393
Bra025493.1	AT5G41550	-	disease resistance protein (TIR-NBS-LRR class),putative	A04	+	5	12.4725	0.0141625	0.29393
Bra039488.1	AT5G36120	CCB3	CCB3 (COFACTOR ASSEMBLY,COMPLEX C (B6F)%2C)	A05	-	2	6.01245	0.0142053	0.294259
Bra012604.1	AT4G18340	-	glycosyl hydrolase family 17 protein	A03	-	4	10.5834	0.0142059	0.294259
Bra000194.1	AT2G40610	ATEXPA8,EXP8,ATEXP8,ATHEXP ALPHA 1.11	ATEXPA8 (ARABIDOPSIS THALIANA EXPANSIN A8)	A03	-	3	8.50808	0.0142067	0.294259
Bra029378.1	AT5G23580	CDPK9,ATCDPK9,CPK12,ATCPK12	CDPK9 (CALMODULIN-LIKE DOMAIN PROTEIN KINASE 9);ATP binding / calcium ion binding / calmodulin-dependent protein kinase/ kinase/ protein kinase/ protein serine/threonine kinase	A02	+	6	14.2159	0.0142945	0.29588
Bra004669.1	AT2G42080	-	DNAJ heat shock N-terminal domain-containing protein	A05	-	6	14.2124	0.0143153	0.296113
Bra002383.1	AT5G22020	-	strictosidine synthase family protein	A10	+	4	10.5623	0.0143442	0.296514
Bra035885.1	AT5G62680	-	proton-dependent oligopeptide transport (POT) family protein	A09	-	5	12.4399	0.0143631	0.296708
Bra004112.1	AT1G65295	-	unknown protein	A07	+	2	5.98762	0.0144066	0.297408
Bra016629.1	AT1G16860	-	merozoite surface protein-related	A08	-	4	10.5482	0.0144374	0.297847
Bra011571.1	AT4G34910	-	DEAD/DEAH box helicase,putative (RH16)	A01	-	13	25.0591	0.0145454	0.299875
Bra036206.1	AT1G58390	-	disease resistance protein (CC-NBS-LRR class),putative	A09	-	3	8.45701	0.0145742	0.300269
Bra030671.1	AT1G07120	-	FUNCTIONS IN: molecular_function unknown;INVOLVED IN: biological_process unknown;LOCATED IN: chloroplast envelope;EXPRESSED IN: leaf whorl,petal,inflorescence meristem,flower;EXPRESSED DURING: 4 anthesis,petal differentiation and expansion stage;BEST Arabidopsis thaliana protein match is: proline-rich family protein (TAIR:AT4G18570.1);Has 197 Blast hits to 171 proteins in 40 species: Archae - 0;B…	A08	+	5	12.3963	0.0146353	0.301178
Bra002625.1	AT5G58700	ATPLC4,PLC4	phosphoinositide-specific phospholipase C family protein	A10	-	8	17.4639	0.0146377	0.301178
Bra019718.1	AT1G13560	AAPT1,ATAAPT1	AAPT1 (AMINOALCOHOLPHOSPHOTRANSFERASE 1);phosphatidyltransferase/ phosphotransferase,for other substituted phosphate groups	A06	-	17	30.7106	0.0146479	0.301188
Bra002498.1	AT5G60280	-	lectin protein kinase family protein	A10	+	4	10.5123	0.0146775	0.301597
Bra013895.1	AT4G25500	ATRSP35,ATRSP40,AT-SRP40,RSP35	ATRSP35;RNA binding / nucleic acid binding / nucleotide binding	A01	+	5	12.3843	0.0147112	0.30209
Bra019683.1	AT1G14080	FUT6,ATFUT6	FUT6 (FUCOSYLTRANSFERASE 6);fucosyltransferase/ transferase,transferring glycosyl groups	A06	+	2	5.94142	0.0147891	0.303218
Bra023756.1	AT3G23150	ETR2	ETR2 (ethylene response 2);ethylene binding / glycogen synthase kinase 3/ protein histidine kinase/ receptor	A01	-	2	5.9408	0.0147943	0.303218
Bra007192.1	AT3G55800	SBPASE	SBPASE (sedoheptulose-bisphosphatase);phosphoric ester hydrolase/ sedoheptulose-bisphosphatase	A09	+	7	15.8127	0.0147954	0.303218
Bra036991.1	AT4G33650	ADL2,DRP3A	DRP3A (DYNAMIN-RELATED PROTEIN 3A);GTP binding / GTPase/ phosphoinositide binding	A03	+	20	34.7821	0.0148346	0.30382
Bra007867.1	AT1G69580	-	transcription factor	A02	+	6	14.1165	0.0148861	0.304674
Bra023430.1	AT5G13710	SMT1,CPH	SMT1 (STEROL METHYLTRANSFERASE 1);sterol 24-C-methyltransferase	A02	-	17	30.6516	0.0149024	0.304685
Bra024913.1	AT2G38970	-	zinc finger (C3HC4-type RING finger) family protein	A06	-	3	8.41195	0.0149062	0.304685
Bra015665.1	AT1G77510	ATPDIL1-2,PDI6,ATPDI6	ATPDIL1-2 (PDI-LIKE 1-2);protein disulfide isomerase	A07	+	10	20.5275	0.0149218	0.304803
Bra011621.1	AT4G35530	-	phosphatidylinositolglycan-related	A01	+	5	12.3495	0.014933	0.304832
Bra015053.1	AT3G24550	ATPERK1	ATPERK1 (PROLINE EXTENSIN-LIKE RECEPTOR KINASE 1);ATP binding / protein kinase	A07	-	7	15.7818	0.0149743	0.305473
Bra037201.1	AT2G12400	-	unknown protein	A09	+	9	18.974	0.0149994	0.305785
Bra038213.1	AT3G19510	HAT3.1	HAT3.1;DNA binding / sequence-specific DNA binding / transcription activator/ transcription factor	A01	+	8	17.3924	0.015034	0.306097
Bra021163.1	AT3G16140	PSAH-1	PSAH-1 (photosystem I subunit H-1)	A01	+	3	8.39483	0.0150344	0.306097
Bra001736.1	AT3G19150	KRP6,ICK4	KRP6 (KIP-RELATED PROTEIN 6);cyclin binding / cyclin-dependent protein kinase inhibitor	A03	-	3	8.38745	0.01509	0.307027
Bra019859.1	AT1G11390	-	ABC1 family protein	A06	-	5	12.3128	0.0151706	0.308465
Bra031377.1	AT1G22250	-	unknown protein	A05	-	2	5.8908	0.0152202	0.308881
Bra013607.1	AT4G22290	-	ubiquitin thiolesterase	A01	-	4	10.4319	0.0152303	0.308881
Bra007950.1	AT1G70870	-	major latex protein-related / MLP-related	A02	-	2	5.88957	0.0152308	0.308881
Bra027835.1	AT1G59760	-	ATP-dependent RNA helicase,putative	A09	+	13	24.9134	0.0152386	0.308881
Bra006539.1	AT5G20090	-	unknown protein	A03	-	4	10.4304	0.0152407	0.308881
Bra029406.1	AT3G49410	-	unknown protein	A02	-	13	24.908	0.0152647	0.308968
Bra015347.1	AT3G13280	-	FUNCTIONS IN: molecular_function unknown;INVOLVED IN: biological_process unknown;LOCATED IN: cellular_component unknown;EXPRESSED IN: stem,sperm cell,leaf whorl,sepal,flower;EXPRESSED DURING: petal differentiation and expansion stage;CONTAINS InterPro DOMAIN/s: Protein of unknown function DUF537 (InterPro:IPR007491);BEST Arabidopsis thaliana protein match is: zinc ion binding (TAIR:AT1G01355.1);H…	A10	-	6	14.0548	0.0152649	0.308968
Bra019527.1	AT3G48140	-	senescence-associated protein,putative	A06	-	3	8.35715	0.0153203	0.309887
Bra031055.1	AT1G18890	ATCDPK1,CPK10	ATCDPK1 (CALCIUM-DEPENDENT PROTEIN KINASE 1);calmodulin-dependent protein kinase/ kinase/ protein kinase	A09	+	7	15.7202	0.0153369	0.310021
Bra006276.1	AT5G15020	SNL2	SNL2 (SIN3-LIKE 2)	A03	-	21	35.9991	0.0153848	0.310787
Bra004519.1	AT2G46640	-	unknown protein	A05	-	4	10.4044	0.0154239	0.311375
Bra012516.1	AT4G20150	-	unknown protein	A03	-	3	8.34219	0.0154354	0.311404
Bra023189.1	AT1G31470	NFD4	NFD4 (NUCLEAR FUSION DEFECTIVE 4)	A09	+	3	8.33945	0.0154565	0.311628
Bra036692.1	AT2G20190	ATCLASP,CLASP	CLASP (CLIP-ASSOCIATED PROTEIN);binding	A09	-	21	35.9792	0.0154679	0.311653
Bra022611.1	AT5G52820	-	WD-40 repeat family protein / notchless protein,putative	A02	-	12	23.4071	0.0154778	0.311653
Bra015693.1	AT1G77120	ADH1,ADH,ATADH,ATADH1	ADH1 (ALCOHOL DEHYDROGENASE 1);alcohol dehydrogenase	A07	+	6	14.0179	0.0154963	0.311778
Bra024761.1	AT1G25320	-	leucine-rich repeat transmembrane protein kinase,putative	A09	+	2	5.85664	0.0155184	0.311778
Bra014671.1	AT2G27030	CAM5	CAM5 (CALMODULIN 5);calcium ion binding	A04	+	2	5.85662	0.0155186	0.311778
Bra026484.1	AT5G23740	RPS11-BETA	RPS11-BETA (RIBOSOMAL PROTEIN S11-BETA);structural constituent of ribosome	A01	-	4	10.3882	0.0155385	0.311778
Bra005161.1	AT2G37770	-	aldo/keto reductase family protein	A05	-	7	15.6849	0.0155489	0.311778
Bra005809.1	AT5G04490	VTE5	VTE5 (vitamin E pathway gene5);phosphatidate cytidylyltransferase/ phytol kinase	A03	+	6	14.0095	0.0155494	0.311778
Bra003016.1	AT4G27585	-	band 7 family protein	A10	-	10	20.4081	0.0155543	0.311778
Bra027834.1	AT1G59218	-	disease resistance protein (CC-NBS-LRR class),putative	A09	+	3	8.32319	0.0155827	0.312145
Bra039329.1	AT2G45570	CYP76C2	CYP76C2;electron carrier/ heme binding / iron ion binding / monooxygenase/ oxygen binding	A04	-	4	10.3783	0.0156095	0.312482
Bra018812.1	AT1G49620	KRP7,ICN6,ICK5	ICK5;cyclin binding / cyclin-dependent protein kinase inhibitor	A06	-	4	10.3601	0.0157406	0.314902
Bra026664.1	AT2G01460	-	ATP binding / kinase	A02	-	26	42.5295	0.0157543	0.314943
Bra000837.1	AT4G03280	PETC,PGR1	PETC (PHOTOSYNTHETIC ELECTRON TRANSFER C);electron transporter,transferring electrons from cytochrome b6/f complex of photosystem II	A03	-	5	12.2237	0.0157629	0.314943
Bra015546.1	AT2G21050	-	amino acid permease,putative	A10	-	5	12.2202	0.0157866	0.315215
Bra027223.1	AT3G15640	-	cytochrome c oxidase family protein	A05	-	5	12.2174	0.0158057	0.315394
Bra021745.1	AT2G31810	-	acetolactate synthase small subunit,putative	A04	+	12	23.3386	0.0158286	0.315469
Bra024095.1	AT4G30210	ATR2,AR2	ATR2 (ARABIDOPSIS P450 REDUCTASE 2);NADPH-hemoprotein reductase	A03	+	15	27.6489	0.0158332	0.315469
Bra019352.1	AT4G22840	-	bile acid:sodium symporter family protein	A03	-	7	15.6356	0.0158493	0.315469
Bra018177.1	AT3G47000	-	glycosyl hydrolase family 3 protein	A06	+	9	18.8204	0.0158501	0.315469
Bra007063.1	AT3G54300	ATVAMP727,VAMP727	ATVAMP727 (VESICLE-ASSOCIATED MEMBRANE PROTEIN 727)	A09	-	4	10.3418	0.0158737	0.31552
Bra009625.1	AT5G01075	-	beta-galactosidase	A10	-	2	5.81659	0.0158757	0.31552
Bra005387.1	AT1G30620	HSR8,MUR4,UXE1	MUR4 (MURUS 4);UDP-arabinose 4-epimerase/ catalytic	A05	+	9	18.8141	0.0158863	0.31552
Bra036283.1	AT4G02260	RSH1,AT-RSH1	RSH1 (RELA-SPOT HOMOLOG 1);catalytic	A09	-	24	39.8696	0.0158944	0.31552
Bra032232.1	AT1G47603	ATPUP19	ATPUP19;purine transmembrane transporter	A05	-	2	5.81268	0.015911	0.31552
Bra011736.1	AT4G36980	-	unknown protein	A01	-	12	23.3223	0.0159136	0.31552
Bra011923.1	AT2G28840	-	ankyrin repeat family protein	A07	+	8	17.2353	0.0159401	0.315843
Bra010101.1	AT5G62600	-	transportin-SR-related	A06	-	27	43.7784	0.0159668	0.316171
Bra018161.1	AT3G47295	-	unknown protein	A06	-	2	5.79483	0.0160734	0.318079
Bra021900.1	AT1G29350	-	FUNCTIONS IN: molecular_function unknown;INVOLVED IN: biological_process unknown;LOCATED IN: cellular_component unknown;EXPRESSED IN: male gametophyte,guard cell,pollen tube;EXPRESSED DURING: L mature pollen stage,M germinated pollen stage;CONTAINS InterPro DOMAIN/s: Protein of unknown function DUF1296 (InterPro:IPR009719);BEST Arabidopsis thaliana protein match is: kinase-related (TAIR:AT1G29370…	A04	-	10	20.3103	0.0160912	0.318228
Bra009930.1	AT5G27030	TPR3	TPR3 (TOPLESS-RELATED 3)	A06	-	24	39.8147	0.0161204	0.318355
Bra018633.1	AT1G08340	-	rac GTPase activating protein,putative	A06	+	4	10.3075	0.0161249	0.318355
Bra003166.1	AT3G54010	PAS1,DEI1	PAS1 (PASTICCINO 1);FK506 binding / binding / peptidyl-prolyl cis-trans isomerase	A07	+	20	34.4783	0.0161283	0.318355
Bra004053.1	AT1G68060	ATMAP70-1	ATMAP70-1 (microtubule-associated proteins 70-1);microtubule binding	A07	+	11	21.7947	0.0161853	0.319045
Bra016927.1	AT2G41550	-	transcription termination factor	A04	-	4	10.2988	0.0161899	0.319045
Bra032137.1	AT2G23910	-	cinnamoyl-CoA reductase-related	A04	+	6	13.9096	0.0161941	0.319045
Bra006080.1	AT5G10840	-	endomembrane protein 70,putative	A03	+	8	17.1906	0.0162079	0.319114
Bra011388.1	AT4G32850	nPAP	nPAP (NUCLEAR POLY(A) POLYMERASE);nucleotidyltransferase/ protein binding	A01	-	10	20.2841	0.016238	0.319305
Bra013053.1	AT4G35000	APX3	APX3 (ASCORBATE PEROXIDASE 3);L-ascorbate peroxidase	A03	-	9	18.753	0.0162381	0.319305
Bra040599.1	AT3G02780	IPP2,IPIAT1,IDI2	IPP2 (ISOPENTENYL PYROPHOSPHATE:DIMETHYLALLYL PYROPHOSPHATE ISOMERASE 2);isopentenyl-diphosphate delta-isomerase	A05	+	6	13.8922	0.0163088	0.320448
Bra010548.1	AT4G24060	-	Dof-type zinc finger domain-containing protein	A08	+	2	5.76839	0.016317	0.320448
Bra002996.1	-	-	-	A10	-	4	10.2792	0.0163358	0.320448
Bra000427.1	AT2G46500	-	phosphatidylinositol 3- and 4-kinase family protein / ubiquitin family protein	A03	-	4	10.279	0.0163375	0.320448
Bra020075.1	AT5G19920	-	transducin family protein / WD-40 repeat family protein	A02	-	7	15.5534	0.0163629	0.320743
Bra008463.1	AT1G80560	-	3-isopropylmalate dehydrogenase,chloroplast,putative	A02	-	11	21.7521	0.0164183	0.321627
Bra014702.1	AT3G56240	CCH	CCH (COPPER CHAPERONE);copper chaperone	A04	+	2	5.75305	0.0164601	0.322242
Bra002096.1	AT2G17840	ERD7	ERD7 (EARLY-RESPONSIVE TO DEHYDRATION 7)	A10	+	4	10.2605	0.0164767	0.322365
Bra036528.1	AT5G24930	ATCOL4,COL4	zinc finger (B-box type) family protein	A09	+	2	5.74968	0.0164917	0.322454
Bra027465.1	AT5G42900	-	unknown protein	A09	+	8	17.1411	0.0165085	0.32258
Bra005764.1	AT5G03430	-	phosphoadenosine phosphosulfate (PAPS) reductase family protein	A03	-	16	28.9056	0.0165409	0.322861
Bra023903.1	AT1G51540	-	INVOLVED IN: biological_process unknown;LOCATED IN: Golgi apparatus;EXPRESSED IN: 22 plant structures;EXPRESSED DURING: 13 growth stages;CONTAINS InterPro DOMAIN/s: Galactose oxidase/kelch,beta-propeller (InterPro:IPR011043),Kelch repeat type 1 (InterPro:IPR006652),Kelch repeat type 2 (InterPro:IPR011498),Kelch related (InterPro:IPR013089),Kelch-type beta propeller (InterPro:IPR015915);BEST Arabi…	A01	-	7	15.525	0.0165436	0.322861
Bra018078.1	AT3G48200	-	unknown protein	A06	+	13	24.6529	0.016556	0.322899
Bra003916.1	AT1G71710	-	inositol polyphosphate 5-phosphatase,putative	A07	+	9	18.6957	0.0165743	0.323053
Bra038761.1	AT4G21710	NRPB2,EMB1989,RPB2	NRPB2;DNA binding / DNA-directed RNA polymerase	A03	-	22	37.0555	0.0165886	0.32313
Bra002035.1	AT2G17240	-	unknown protein	A10	-	2	5.73533	0.0166269	0.323666
Bra032941.1	AT3G26690	ATNUDT13,ATNUDX13	ATNUDX13 (ARABIDOPSIS THALIANA NUDIX HYDROLASE HOMOLOG 13);bis(5'-adenosyl)-pentaphosphatase/ hydrolase	A02	+	5	12.098	0.016637	0.323666
Bra039732.1	AT4G14560	IAA1,AXR5	IAA1 (INDOLE-3-ACETIC ACID INDUCIBLE);protein binding / transcription factor	A08	+	2	5.7307	0.0166709	0.324052
Bra029803.1	AT3G09900	ATRABE1E,ATRAB8E	ATRABE1E (ARABIDOPSIS RAB GTPASE HOMOLOG E1E);GTP binding	A05	-	8	17.1137	0.0166777	0.324052
Bra018716.1	AT1G48260	CIPK17,SnRK3.21	CIPK17 (CBL-INTERACTING PROTEIN KINASE 17);ATP binding / kinase/ protein kinase/ protein serine/threonine kinase	A06	+	15	27.4696	0.0167171	0.32449
Bra013161.1	AT2G06050	OPR3	OPR3 (OPDA-REDUCTASE 3);12-oxophytodienoate reductase	A03	+	5	12.0863	0.0167211	0.32449
Bra007498.1	AT3G59980	-	tRNA-binding region domain-containing protein	A09	-	3	8.17463	0.0167842	0.325511
Bra008739.1	AT5G14760	AO	AO (L-ASPARTATE OXIDASE);L-aspartate oxidase/ electron carrier/ oxidoreductase	A10	-	7	15.4791	0.0168406	0.326376
Bra011292.1	AT1G77520	-	O-methyltransferase family 2 protein	A01	-	4	10.2117	0.0168498	0.326376
Bra000655.1	AT4G08690	-	SEC14 cytosolic factor family protein / phosphoglyceride transfer family protein	A03	-	5	12.0668	0.0168617	0.326402
Bra018654.1	AT1G08110	-	lactoylglutathione lyase,putative / glyoxalase I,putative	A06	+	8	17.079	0.0168938	0.326501
Bra033293.1	AT1G01040	DCL1,CAF,SUS1,SIN1,ASU1,EMB76,EMB60,ATDCL1	DCL1 (DICER-LIKE 1);ATP-dependent helicase/ double-stranded RNA binding / protein binding / ribonuclease III	A10	+	18	31.5879	0.0169225	0.326501
Bra012838.1	AT3G51770	ETO1	ETO1 (ETHYLENE OVERPRODUCER 1);protein binding,bridging	A03	-	4	10.2019	0.0169255	0.326501
Bra009790.1	AT5G24710	-	FUNCTIONS IN: molecular_function unknown;INVOLVED IN: biological_process unknown;LOCATED IN: plasma membrane;EXPRESSED IN: 23 plant structures;EXPRESSED DURING: 14 growth stages;CONTAINS InterPro DOMAIN/s: WD40 repeat-like (InterPro:IPR011046),WD40 repeat,region (InterPro:IPR017986),WD40 repeat (InterPro:IPR001680),WD40/YVTN repeat-like (InterPro:IPR015943);Has 46946 Blast hits to 23834 proteins …	A06	-	20	34.299	0.01694	0.326501
Bra022145.1	AT5G47620	-	heterogeneous nuclear ribonucleoprotein,putative / hnRNP,putative	A02	-	2	5.70043	0.0169608	0.326501
Bra038649.1	AT5G63620	-	oxidoreductase,zinc-binding dehydrogenase family protein	A06	-	8	17.0678	0.0169641	0.326501
Bra026006.1	AT1G17050	SPS2	SPS2 (Solanesyl diphosphate synthase 2);trans-octaprenyltranstransferase	A06	+	6	13.7945	0.0169691	0.326501
Bra020705.1	AT5G48380	-	leucine-rich repeat family protein / protein kinase family protein	A02	-	3	8.15253	0.0169708	0.326501
Bra000274.1	AT2G42780	-	FUNCTIONS IN: molecular_function unknown;INVOLVED IN: regulation of transcription;LOCATED IN: integral to membrane,nucleus;EXPRESSED IN: 20 plant structures;EXPRESSED DURING: 11 growth stages;CONTAINS InterPro DOMAIN/s: RNA polymerase II transcription factor SIII,subunit A (InterPro:IPR010684);Has 143 Blast hits to 142 proteins in 57 species: Archae - 0;Bacteria - 0;Metazoa - 96;Fungi - 19;Plants…	A03	+	9	18.6281	0.0169801	0.326501
Bra002964.1	AT5G54680	ILR3	ILR3 (iaa-leucine resistant3);DNA binding / transcription factor	A10	+	5	12.0486	0.0169934	0.326501
Bra029736.1	AT3G08970	ATERDJ3A,TMS1	ATERDJ3A;oxidoreductase	A05	-	7	15.4527	0.0170134	0.326501
Bra012940.1	AT5G61580	PFK4	PFK4 (PHOSPHOFRUCTOKINASE 4);6-phosphofructokinase	A03	+	13	24.5658	0.0170198	0.326501
Bra016993.1	AT2G40460	-	proton-dependent oligopeptide transport (POT) family protein	A04	+	4	10.1893	0.0170239	0.326501
Bra011616.1	AT4G35450	AKR2,AFT,AKR2A	AKR2 (ANKYRIN REPEAT-CONTAINING PROTEIN 2);protein binding	A01	-	8	17.0575	0.017029	0.326501
Bra010891.1	AT1G28230	PUP1,ATPUP1	PUP1 (PURINE PERMEASE 1);purine nucleoside transmembrane transporter/ purine transmembrane transporter	A08	+	2	5.69308	0.0170319	0.326501
Bra021722.1	AT3G53870	-	40S ribosomal protein S3 (RPS3B)	A04	-	6	13.7849	0.0170349	0.326501
Bra013814.1	AT4G24560	UBP16	UBP16 (UBIQUITIN-SPECIFIC PROTEASE 16);ubiquitin thiolesterase/ ubiquitin-specific protease/ zinc ion binding	A01	-	11	21.6384	0.0170568	0.32657
Bra007580.1	AT3G61180	-	zinc finger (C3HC4-type RING finger) family protein	A09	+	5	12.0396	0.0170595	0.32657
Bra030908.1	AT1G54080	UBP1A	oligouridylate-binding protein,putative	A08	+	11	21.6301	0.0171041	0.327131
Bra004864.1	AT2G44745	-	WRKY family transcription factor	A05	-	4	10.1778	0.0171141	0.327131
Bra000499.1	AT2G27900	-	unknown protein	A03	-	13	24.5472	0.0171204	0.327131
Bra002569.1	AT5G59400	-	unknown protein	A10	+	7	15.4262	0.0171889	0.328236
Bra025953.1	AT1G17710	-	phosphatase	A06	-	4	10.1595	0.017258	0.329355
Bra001704.1	AT3G18390	EMB1865	EMB1865 (embryo defective 1865);RNA binding	A03	+	7	15.4111	0.017289	0.329744
Bra005682.1	AT5G01520	-	zinc finger (C3HC4-type RING finger) family protein	A03	-	5	11.9932	0.0174017	0.331092
Bra006593.1	AT5G21090	-	leucine-rich repeat protein,putative	A03	+	5	11.9931	0.017403	0.331092
Bra033163.1	AT4G11010	NDPK3	NDPK3 (NUCLEOSIDE DIPHOSPHATE KINASE 3);ATP binding / nucleoside diphosphate kinase	A02	+	7	15.3938	0.0174053	0.331092
Bra036636.1	AT1G62990	KNAT7,IXR11	KNAT7 (KNOTTED-LIKE HOMEOBOX OF ARABIDOPSIS THALIANA 7);DNA binding / transcription activator/ transcription factor	A09	+	5	11.9922	0.0174095	0.331092
Bra000848.1	AT1G52810	-	2-oxoglutarate-dependent dioxygenase-related	A03	-	4	10.14	0.017413	0.331092
Bra031601.1	AT5G60390	-	elongation factor 1-alpha / EF-1-alpha	A09	-	2	5.6502	0.0174534	0.331657
Bra036531.1	AT5G25080	-	FUNCTIONS IN: molecular_function unknown;INVOLVED IN: biological_process unknown;LOCATED IN: cellular_component unknown;EXPRESSED IN: 22 plant structures;EXPRESSED DURING: 13 growth stages;CONTAINS InterPro DOMAIN/s: Sas10/Utp3/C1D (InterPro:IPR007146),Exosome-associated factor Rrp47/DNA strand repair C1D (InterPro:IPR011082);Has 137 Blast hits to 137 proteins in 56 species: Archae - 0;Bacteria -…	A09	+	5	11.9824	0.0174827	0.331926
Bra034729.1	AT3G12780	PGK1	PGK1 (PHOSPHOGLYCERATE KINASE 1);phosphoglycerate kinase	A05	+	3	8.09238	0.0174889	0.331926
Bra031553.1	AT1G07110	F2KP,ATF2KP,FKFBP	F2KP (FRUCTOSE-2%2C6-BISPHOSPHATASE);fructose-2%2C6-bisphosphate 2-phosphatase	A09	+	23	38.1748	0.0175115	0.332153
Bra024896.1	AT2G01220	-	nucleotidyltransferase	A06	-	12	23.0222	0.0175484	0.332649
Bra032027.1	AT3G02950	-	FUNCTIONS IN: molecular_function unknown;INVOLVED IN: biological_process unknown;LOCATED IN: cellular_component unknown;EXPRESSED IN: 18 plant structures;EXPRESSED DURING: 9 growth stages;CONTAINS InterPro DOMAIN/s: Tho complex subunit 7 (InterPro:IPR018018),Tho complex subunit 7/Mft1p (InterPro:IPR008501);BEST Arabidopsis thaliana protein match is: unknown protein (TAIR:AT5G16790.1);Has 2049 Bla…	A02	-	2	5.63501	0.0176052	0.333392
Bra014503.1	AT3G60245	-	60S ribosomal protein L37a (RPL37aC)	A04	-	4	10.1155	0.017609	0.333392
Bra002219.1	AT5G19180	ECR1	ECR1 (E1 C-terminal related 1);NEDD8 activating enzyme/ protein heterodimerization/ small protein activating enzyme	A10	-	9	18.523	0.0176294	0.333435
Bra038685.1	AT3G11910	UBP13	UBP13 (UBIQUITIN-SPECIFIC PROTEASE 13);ubiquitin thiolesterase/ ubiquitin-specific protease	A01	+	31	48.5074	0.0176329	0.333435
Bra007655.1	AT3G62030	ROC4	peptidyl-prolyl cis-trans isomerase,chloroplast / cyclophilin / rotamase / cyclosporin A-binding protein (ROC4)	A09	+	7	15.3586	0.0176435	0.333435
Bra037375.1	AT2G19610	-	zinc finger (C3HC4-type RING finger) family protein	A09	+	4	10.1063	0.0176837	0.333666
Bra037743.1	AT2G43000	anac042	anac042 (Arabidopsis NAC domain containing protein 42);transcription factor	A04	-	3	8.06988	0.0176868	0.333666
Bra036701.1	AT2G19800	MIOX2	MIOX2 (MYO-INOSITOL OXYGENASE 2);inositol oxygenase	A09	-	11	21.528	0.017698	0.333666
Bra027853.1	AT1G55860	UPL1	UPL1 (UBIQUITIN-PROTEIN LIGASE 1);ubiquitin-protein ligase	A09	-	5	11.9536	0.0176999	0.333666
Bra010520.1	AT4G35740	RecQl3	RecQl3;ATP binding / ATP-dependent helicase/ helicase/ nucleic acid binding	A08	-	18	31.4273	0.0177095	0.333666
Bra018969.1	AT1G52400	BGL1,BGLU18	BGLU18 (BETA GLUCOSIDASE 18);catalytic/ cation binding / hydrolase,hydrolyzing O-glycosyl compounds	A06	-	13	24.4369	0.0177287	0.333826
Bra004657.1	AT2G41870	-	remorin family protein	A05	-	2	5.6213	0.0177435	0.333902
Bra011046.1	AT4G28650	-	leucine-rich repeat transmembrane protein kinase,putative	A01	+	2	5.61932	0.0177635	0.334066
Bra026659.1	AT2G01490	-	phytanoyl-CoA dioxygenase (PhyH) family protein	A02	-	9	18.5002	0.0177737	0.334066
Bra000518.1	AT5G37290	-	armadillo/beta-catenin repeat family protein	A03	-	6	13.6784	0.0177864	0.334102
Bra023518.1	AT5G15450	APG6,CLPB3,CLPB-P	CLPB3 (CASEIN LYTIC PROTEINASE B3);ATP binding / ATPase/ nucleoside-triphosphatase/ nucleotide binding / protein binding	A02	-	8	16.9312	0.017845	0.335
Bra024245.1	AT5G63890	ATHDH	ATHDH (HISTIDINOL DEHYDROGENASE);histidinol dehydrogenase	A06	-	13	24.4137	0.0178589	0.33502
Bra024069.1	AT4G30520	-	leucine-rich repeat family protein / protein kinase family protein	A03	-	11	21.4995	0.0178676	0.33502
Bra024306.1	AT5G64530	ANAC104,XND1	XND1;transcription factor	A06	+	3	8.03547	0.0179937	0.336797
Bra018954.1	AT1G52220	-	FUNCTIONS IN: molecular_function unknown;INVOLVED IN: biological_process unknown;LOCATED IN: chloroplast thylakoid membrane,chloroplast;EXPRESSED IN: 23 plant structures;EXPRESSED DURING: 13 growth stages;BEST Arabidopsis thaliana protein match is: PSI-P (PHOTOSYSTEM I P SUBUNIT);DNA binding (TAIR:AT2G46820.2);Has 203 Blast hits to 203 proteins in 35 species: Archae - 0;Bacteria - 66;Metazoa - 0;…	A06	+	6	13.6487	0.0180021	0.336797
Bra036731.1	AT1G33240	AT-GTL1,AT-GTL2	AT-GTL1 (GT2-LIKE 1);DNA binding / transcription factor	A08	+	3	8.03435	0.0180037	0.336797
Bra039280.1	AT2G46500	-	phosphatidylinositol 3- and 4-kinase family protein / ubiquitin family protein	A04	-	2	5.59559	0.0180057	0.336797
Bra031046.1	AT5G01750	-	unknown protein	A09	+	3	8.03169	0.0180277	0.336938
Bra017106.1	AT2G38720	MAP65-5	MAP65-5 (MICROTUBULE-ASSOCIATED PROTEIN 65-5);microtubule binding	A04	+	10	19.9802	0.0180349	0.336938
Bra025260.1	AT3G27240	-	cytochrome c1,putative	A06	+	7	15.292	0.0181033	0.337973
Bra018995.1	AT1G52870	-	peroxisomal membrane protein-related	A06	-	5	11.8998	0.0181121	0.337973
Bra037980.1	AT1G55120	ATFRUCT5,AtcwINV3	ATFRUCT5 (BETA-FRUCTOFURANOSIDASE 5);hydrolase,hydrolyzing O-glycosyl compounds / levanase	A06	-	6	13.6209	0.0182059	0.339519
Bra036642.1	AT1G12520	ATCCS	ATCCS (COPPER CHAPERONE FOR SOD1);superoxide dismutase/ superoxide dismutase copper chaperone	A09	-	3	8.00942	0.0182295	0.339756
Bra013813.1	AT4G24550	-	clathrin adaptor complexes medium subunit family protein	A01	+	13	24.3379	0.0182915	0.340471
Bra007060.1	AT3G54270	-	sucrose-phosphatase 3 (SPP3)	A09	-	8	16.8634	0.0182986	0.340471
Bra037350.1	AT4G00620	-	tetrahydrofolate dehydrogenase/cyclohydrolase,putative	A09	+	5	11.8743	0.018311	0.340471
Bra003904.1	AT1G71940	-	FUNCTIONS IN: molecular_function unknown;INVOLVED IN: biological_process unknown;LOCATED IN: cellular_component unknown;EXPRESSED IN: 22 plant structures;EXPRESSED DURING: 13 growth stages;CONTAINS InterPro DOMAIN/s: SNARE associated Golgi protein (InterPro:IPR015414);BEST Arabidopsis thaliana protein match is: unknown protein (TAIR:AT4G09580.1);Has 2462 Blast hits to 2462 proteins in 530 species…	A07	-	4	10.0301	0.0183117	0.340471
Bra015669.1	AT1G77480	-	nucellin protein,putative	A07	-	6	13.6024	0.0183422	0.340747
Bra022719.1	AT5G54400	-	methyltransferase	A02	-	2	5.56091	0.0183659	0.340747
Bra032943.1	AT3G26710	CCB1	CCB1 (COFACTOR ASSEMBLY OF COMPLEX C)	A02	-	4	10.0233	0.0183691	0.340747
Bra010626.1	AT4G37980	ELI3-1,ELI3,ATCAD7,CAD7	ELI3-1 (ELICITOR-ACTIVATED GENE 3-1);binding / catalytic/ oxidoreductase/ zinc ion binding	A08	+	4	10.0231	0.0183704	0.340747
Bra029924.1	AT3G48900	-	DNA binding / catalytic/ chromatin binding / nuclease	A01	+	14	25.7413	0.0184122	0.341318
Bra027171.1	AT3G16340	ATPDR1,PDR1	PDR1;ATPase,coupled to transmembrane movement of substances	A05	-	21	35.3165	0.0184821	0.342409
Bra006620.1	AT5G22310	-	unknown protein	A03	-	3	7.9798	0.0185015	0.342426
Bra030759.1	AT1G09160	-	protein phosphatase 2C-related / PP2C-related	A08	+	7	15.2351	0.018505	0.342426
Bra012602.1	AT4G18360	-	(S)-2-hydroxy-acid oxidase,peroxisomal,putative / glycolate oxidase,putative / short chain alpha-hydroxy acid oxidase,putative	A03	-	11	21.3876	0.0185475	0.343006
Bra009623.1	AT5G01030	-	unknown protein	A10	+	2	5.53782	0.0186098	0.343954
Bra017934.1	AT1G21640	NADK2,ATNADK2	NADK2;NAD+ kinase/ calmodulin binding	A06	+	8	16.8147	0.0186309	0.34414
Bra025293.1	AT3G27640	-	transducin family protein / WD-40 repeat family protein	A06	-	16	28.4924	0.0186824	0.344818
Bra001537.1	AT3G14172	-	FUNCTIONS IN: molecular_function unknown;INVOLVED IN: biological_process unknown;LOCATED IN: cellular_component unknown;BEST Arabidopsis thaliana protein match is: COP1-interacting protein-related (TAIR:AT1G72410.1);Has 2665 Blast hits to 1956 proteins in 215 species: Archae - 2;Bacteria - 189;Metazoa - 878;Fungi - 141;Plants - 132;Viruses - 5;Other Eukaryotes - 1318 (source: NCBI BLink).	A03	-	11	21.3646	0.0186898	0.344818
Bra023637.1	AT5G17800	AtMYB56	AtMYB56 (myb domain protein 56);DNA binding / transcription factor	A02	+	3	7.95626	0.0187206	0.345182
Bra008430.1	AT1G80920	J8	J8;heat shock protein binding / unfolded protein binding	A02	+	3	7.95014	0.018778	0.345901
Bra014870.1	AT4G11820	MVA1	MVA1;acetyl-CoA C-acetyltransferase/ hydroxymethylglutaryl-CoA synthase	A07	+	12	22.8126	0.0187819	0.345901
Bra034153.1	AT3G10915	-	reticulon family protein	A01	+	5	11.8125	0.0188018	0.346062
Bra017644.1	AT4G34290	-	SWIB complex BAF60b domain-containing protein	A03	+	2	5.51696	0.018833	0.346431
Bra032783.1	AT1G25220	ASB1,TRP4,WEI7	ASB1 (ANTHRANILATE SYNTHASE BETA SUBUNIT 1);anthranilate synthase	A09	-	8	16.782	0.0188573	0.346518
Bra038047.1	AT4G16050	-	unknown protein	A08	+	2	5.51445	0.01886	0.346518
Bra025772.1	AT1G19835	-	unknown protein	A06	-	5	11.8025	0.0188817	0.346712
Bra021259.1	AT3G17611	ATRBL14	ATRBL14 (ARABIDOPSIS RHOMBOID-LIKE PROTEIN 14);zinc ion binding	A01	-	4	9.95664	0.0189384	0.347545
Bra035672.1	AT2G28760	UXS6	NAD-dependent epimerase/dehydratase family protein	A04	-	9	18.3203	0.0189495	0.347545
Bra030791.1	AT1G09660	-	KH domain-containing quaking protein,putative	A08	+	7	15.168	0.0189892	0.348068
Bra029494.1	AT5G13790	AGL15	AGL15 (AGAMOUS-LIKE 15);DNA binding / transcription factor	A09	-	4	9.94724	0.01902	0.348221
Bra001715.1	AT3G18680	-	aspartate/glutamate/uridylate kinase family protein	A03	+	7	15.1624	0.0190305	0.348221
Bra015959.1	AT1G73840	ESP1	ESP1 (ENHANCED SILENCING PHENOTYPE 1)	A07	-	7	15.1618	0.0190349	0.348221
Bra039676.1	AT1G53510	ATMPK18	ATMPK18;MAP kinase	A06	+	9	18.3065	0.0190424	0.348221
Bra020123.1	AT5G20700	-	senescence-associated protein-related	A02	-	2	5.49604	0.0190595	0.34833
Bra016536.1	AT1G18840	IQD30	IQD30;calmodulin binding	A08	+	9	18.2985	0.0190964	0.348799
Bra024230.1	AT4G28080	-	binding	A03	-	23	37.8314	0.0191361	0.349317
Bra014051.1	AT1G45976	SBP1	SBP1 (s-ribonuclease binding protein 1);protein binding / zinc ion binding	A08	-	4	9.92683	0.0191985	0.350173
Bra004792.1	AT2G43910	-	thiol methyltransferase,putative	A05	-	8	16.732	0.0192087	0.350173
Bra019380.1	AT4G22330	ATCES1	ATCES1;catalytic/ hydrolase,acting on carbon-nitrogen (but not peptide) bonds,in linear amides	A03	+	2	5.48168	0.0192168	0.350173
Bra008152.1	AT1G74470	-	geranylgeranyl reductase	A02	+	3	7.89626	0.0192907	0.351315
Bra037587.1	AT3G18380	-	sequence-specific DNA binding / transcription factor	A01	+	9	18.2664	0.0193154	0.351559
Bra019953.1	AT5G35360	CAC2	CAC2;acetyl-CoA carboxylase/ biotin carboxylase	A06	+	15	26.9744	0.0194018	0.352923
Bra010852.1	AT1G29070	-	ribosomal protein L34 family protein	A08	-	2	5.46355	0.0194172	0.352998
Bra005417.1	AT2G34530	-	unknown protein	A05	+	4	9.8932	0.0194962	0.354226
Bra031185.1	AT2G21385	-	unknown protein	A09	-	11	21.2338	0.0195213	0.354475
Bra031205.1	AT2G21620	RD2	RD2	A09	-	5	11.7196	0.0195629	0.355023
Bra021535.1	AT3G14130	-	(S)-2-hydroxy-acid oxidase,peroxisomal,putative / glycolate oxidase,putative / short chain alpha-hydroxy acid oxidase,putative	A01	+	11	21.2248	0.0195796	0.355119
Bra002354.1	AT5G21090	-	leucine-rich repeat protein,putative	A10	-	6	13.438	0.0196024	0.35523
Bra000961.1	AT4G00720	ATSK32	ATSK32 (SHAGGY-LIKE PROTEIN KINASE 32);ATP binding / kinase/ protein kinase/ protein serine/threonine kinase/ protein tyrosine kinase	A03	+	13	24.1127	0.0196348	0.35523
Bra007629.1	AT2G25410	-	protein binding / zinc ion binding	A09	-	5	11.7109	0.0196358	0.35523
Bra000587.1	AT2G20950	-	EXPRESSED IN: 23 plant structures;EXPRESSED DURING: 13 growth stages;CONTAINS InterPro DOMAIN/s: Phospholipase-like,arabidopsis (InterPro:IPR007942);BEST Arabidopsis thaliana protein match is: unknown protein (TAIR:AT4G38550.1);Has 618 Blast hits to 562 proteins in 105 species: Archae - 7;Bacteria - 22;Metazoa - 391;Fungi - 75;Plants - 96;Viruses - 2;Other Eukaryotes - 25 (source: NCBI BLink).	A03	-	8	16.6711	0.0196443	0.35523
Bra014990.1	AT3G23870	-	permease-related	A07	-	8	16.6708	0.0196467	0.35523
Bra034925.1	AT1G42990	ATBZIP60,BZIP60	ATBZIP60 (BASIC REGION/LEUCINE ZIPPER MOTIF 60);DNA binding / transcription factor	A08	-	3	7.85822	0.0196612	0.35523
Bra033432.1	AT3G52430	PAD4,ATPAD4	PAD4 (PHYTOALEXIN DEFICIENT 4);lipase/ protein binding / triacylglycerol lipase	A04	-	2	5.44133	0.0196657	0.35523
Bra011805.1	AT4G38060	-	unknown protein	A01	+	2	5.42815	0.0198147	0.357422
Bra006853.1	AT5G56840	-	DNA-binding family protein	A03	-	3	7.84254	0.0198159	0.357422
Bra019211.1	AT4G24760	-	unknown protein	A03	-	7	15.0565	0.0198216	0.357422
Bra037559.1	AT3G18790	-	FUNCTIONS IN: molecular_function unknown;INVOLVED IN: biological_process unknown;LOCATED IN: chloroplast;EXPRESSED IN: 22 plant structures;EXPRESSED DURING: 13 growth stages;CONTAINS InterPro DOMAIN/s: Isy1-like splicing (InterPro:IPR009360);Has 1075 Blast hits to 879 proteins in 176 species: Archae - 8;Bacteria - 11;Metazoa - 379;Fungi - 177;Plants - 27;Viruses - 9;Other Eukaryotes - 464 (source…	A01	-	2	5.42396	0.0198622	0.357674
Bra024182.1	AT4G28740	-	FUNCTIONS IN: molecular_function unknown;INVOLVED IN: biological_process unknown;LOCATED IN: chloroplast;EXPRESSED IN: 21 plant structures;EXPRESSED DURING: 13 growth stages;BEST Arabidopsis thaliana protein match is: LPA1 (LOW PSII ACCUMULATION1);binding (TAIR:AT1G02910.1);Has 65 Blast hits to 65 proteins in 19 species: Archae - 0;Bacteria - 17;Metazoa - 0;Fungi - 0;Plants - 46;Viruses - 0;Other…	A03	+	4	9.84795	0.0199038	0.357674
Bra038358.1	AT1G68730	-	zinc finger (DNL type) family protein	A02	-	4	9.8476	0.019907	0.357674
Bra005219.1	AT2G37080	-	myosin heavy chain-related	A05	+	3	7.83303	0.0199104	0.357674
Bra006458.1	AT1G63730	-	disease resistance protein (TIR-NBS-LRR class),putative	A03	+	2	5.41714	0.0199399	0.357674
Bra039075.1	AT3G27520	-	unknown protein	A09	+	2	5.41613	0.0199516	0.357674
Bra001086.1	-	-	-	A03	+	2	5.41453	0.0199699	0.357674
Bra027316.1	AT3G14740	-	PHD finger family protein	A05	+	2	5.41448	0.0199704	0.357674
Bra028321.1	AT3G23600	-	dienelactone hydrolase family protein	A01	-	7	15.0364	0.0199752	0.357674
Bra027006.1	AT1G62990	KNAT7,IXR11	KNAT7 (KNOTTED-LIKE HOMEOBOX OF ARABIDOPSIS THALIANA 7);DNA binding / transcription activator/ transcription factor	A09	-	5	11.6702	0.0199799	0.357674
Bra005580.1	AT2G32280	-	unknown protein	A05	+	3	7.82577	0.0199827	0.357674
Bra002839.1	AT5G56170	-	FUNCTIONS IN: molecular_function unknown;INVOLVED IN: biological_process unknown;LOCATED IN: anchored to membrane;EXPRESSED IN: 22 plant structures;EXPRESSED DURING: 13 growth stages;BEST Arabidopsis thaliana protein match is: LRE (LORELEI) (TAIR:AT4G26466.1);Has 71 Blast hits to 71 proteins in 9 species: Archae - 0;Bacteria - 0;Metazoa - 0;Fungi - 0;Plants - 71;Viruses - 0;Other Eukaryotes - 0 (…	A10	+	2	5.41319	0.0199852	0.357674
Bra001840.1	AT3G21690	-	MATE efflux family protein	A03	+	5	11.6696	0.0199852	0.357674
Bra002997.1	AT5G54300	-	unknown protein	A10	-	2	5.40357	0.0200956	0.359437
Bra028543.1	AT3G52930	-	fructose-bisphosphate aldolase,putative	A02	-	3	7.81238	0.020117	0.359437
Bra022742.1	AT5G54770	THI1,TZ,THI4	THI1;protein homodimerization	A02	-	3	7.81223	0.0201185	0.359437
Bra027418.1	AT3G13590	-	DC1 domain-containing protein	A05	+	2	5.3929	0.0202188	0.360941
Bra022396.1	AT3G19220	CYO1,SCO2	SCO2 (SNOWY COTYLEDON 2);protein disulfide isomerase	A05	-	3	7.80051	0.0202367	0.360941
Bra016411.1	AT1G77350	-	unknown protein	A08	-	4	9.81001	0.0202521	0.360941
Bra026439.1	AT4G26430	CSN6B	CSN6B	A01	+	9	18.1322	0.0202566	0.360941
Bra018882.1	AT3G20570	-	plastocyanin-like domain-containing protein	A06	+	2	5.38911	0.0202628	0.360941
Bra028913.1	AT5G01850	-	protein kinase,putative	A02	-	4	9.80782	0.0202724	0.360941
Bra002637.1	AT5G58560	-	phosphatidate cytidylyltransferase family protein	A10	+	5	11.6341	0.0202901	0.36105
Bra020140.1	AT5G20960	AAO1,AO1,ATAO,ATAO1	AAO1 (ARABIDOPSIS ALDEHYDE OXIDASE 1);aldehyde oxidase/ indole-3-acetaldehyde oxidase	A02	+	10	19.6289	0.020346	0.36177
Bra024256.1	AT5G63990	-	3'(2')%2C5'-bisphosphate nucleotidase,putative / inositol polyphosphate 1-phosphatase,putative	A06	+	8	16.5748	0.0203539	0.36177
Bra018847.1	AT1G50410	-	SNF2 domain-containing protein / helicase domain-containing protein / RING finger domain-containing protein	A06	-	10	19.6224	0.0203911	0.362224
Bra025091.1	AT5G45130	ATRAB5A,ATRABF2A,RABF2A,RAB5A,RHA1,ATRAB-F2A,RAB-F2A	RHA1 (RAB HOMOLOG 1);GTP binding	A06	-	7	14.979	0.0204208	0.362545
Bra022904.1	AT2G32790	-	ubiquitin-conjugating enzyme,putative	A03	-	2	5.37438	0.0204346	0.362582
Bra006702.1	AT3G46430	-	unknown protein	A03	+	2	5.36972	0.0204893	0.363346
Bra022828.1	AT2G31130	-	unknown protein	A03	-	3	7.77293	0.0205178	0.363377
Bra039123.1	AT3G01370	ATCFM2,CFM2	ATCFM2 (CRM FAMILY MEMBER 2);RNA binding	A05	+	13	23.9718	0.0205216	0.363377
Bra017258.1	AT2G36145	-	unknown protein	A04	+	7	14.9656	0.0205261	0.363377
Bra029118.1	AT5G52380	-	zinc knuckle (CCHC-type) family protein	A03	+	5	11.604	0.020552	0.363628
Bra013931.1	AT4G25900	-	aldose 1-epimerase family protein	A01	+	8	16.5456	0.0205731	0.363794
Bra039798.1	AT3G44670	-	ATP binding / nucleoside-triphosphatase/ nucleotide binding / protein binding / transmembrane receptor	A04	-	7	14.9581	0.020585	0.363798
Bra027422.1	AT3G13550	FUS9,EMB144,COP10,CIN4	FUS9 (FUSCA 9);protein binding / ubiquitin-protein ligase	A05	+	4	9.77213	0.0206058	0.363958
Bra008923.1	AT5G11960	-	unknown protein	A10	+	9	18.0758	0.0206655	0.364589
Bra026179.1	AT1G14910	-	epsin N-terminal homology (ENTH) domain-containing protein	A06	-	15	26.7612	0.0206765	0.364589
Bra038764.1	AT4G21670	CPL1,FRY2,ATCPL1	CPL1 (C-TERMINAL DOMAIN PHOSPHATASE-LIKE 1);double-stranded RNA binding / nucleotide phosphatase	A03	+	16	28.1434	0.0206884	0.364589
Bra015039.1	AT3G24440	VRN5,VIL1	VRN5 (VERNALIZATION 5)	A07	+	3	7.75636	0.0206885	0.364589
Bra018467.1	AT1G10020	-	unknown protein	A05	+	2	5.35136	0.0207062	0.364675
Bra012085.1	AT5G66600	-	unknown protein	A07	+	10	19.576	0.0207168	0.364675
Bra023256.1	AT5G46860	VAM3,ATVAM3,SYP22,ATSYP22,SGR3	VAM3;SNAP receptor	A09	-	7	14.9385	0.0207402	0.36488
Bra006857.1	AT5G56760	ATSERAT1%3B1,SAT5,SAT-52	ATSERAT1%3B1 (ARABIDOPSIS THALIANA SERINE ACETYLTRANSFERASE 1%3B1);serine O-acetyltransferase	A03	+	2	5.34721	0.0207555	0.364941
Bra015335.1	AT1G04620	-	coenzyme F420 hydrogenase family / dehydrogenase,beta subunit family	A10	+	19	32.2006	0.0208149	0.365502
Bra020377.1	AT5G58300	-	leucine-rich repeat transmembrane protein kinase,putative	A02	-	2	5.34174	0.0208207	0.365502
Bra003240.1	AT3G56410	-	unknown protein	A07	-	3	7.74154	0.0208423	0.365502
Bra002347.1	AT5G20960	AAO1,AO1,ATAO,ATAO1	AAO1 (ARABIDOPSIS ALDEHYDE OXIDASE 1);aldehyde oxidase/ indole-3-acetaldehyde oxidase	A10	-	10	19.5577	0.020847	0.365502
Bra016228.1	AT1G70260	-	nodulin MtN21 family protein	A07	-	7	14.9231	0.0208629	0.365502
Bra006763.1	AT5G58510	-	unknown protein	A03	+	28	43.9618	0.0208663	0.365502
Bra010516.1	AT4G35780	-	protein kinase family protein	A08	+	16	28.1133	0.0208704	0.365502
Bra037132.1	AT5G66980	-	transcriptional factor B3 family protein	A09	+	4	9.74199	0.0208916	0.365502
Bra020885.1	AT4G21105	-	cytochrome-c oxidase/ electron carrier	A08	-	2	5.3352	0.0208989	0.365502
Bra038682.1	AT3G11830	-	chaperonin,putative	A01	-	14	25.3265	0.020905	0.365502
Bra004260.1	AT1G67800	-	copine-related	A07	-	9	18.0378	0.0209445	0.365987
Bra024756.1	AT1G25380	-	mitochondrial substrate carrier family protein	A09	+	9	18.0327	0.0209828	0.366451
Bra004098.1	AT1G67250	-	proteasome maturation factor UMP1 family protein	A07	+	4	9.73022	0.0210042	0.366618
Bra030666.1	AT1G06950	ATTIC110,TIC110	TIC110 (TRANSLOCON AT THE INNER ENVELOPE MEMBRANE OF CHLOROPLASTS 110)	A08	+	15	26.7038	0.0210328	0.366836
Bra004498.1	AT2G46900	-	FUNCTIONS IN: molecular_function unknown;INVOLVED IN: biological_process unknown;LOCATED IN: cellular_component unknown;EXPRESSED IN: 24 plant structures;EXPRESSED DURING: 15 growth stages;CONTAINS InterPro DOMAIN/s: Basic helix-loop-helix,Nulp1-type (InterPro:IPR006994);Has 3014 Blast hits to 2357 proteins in 239 species: Archae - 2;Bacteria - 96;Metazoa - 1166;Fungi - 321;Plants - 100;Viruses -…	A05	-	3	7.72263	0.0210403	0.366836
Bra022547.1	AT5G51430	EYE	EYE (EMBRYO YELLOW)	A02	+	10	19.5271	0.0210658	0.367074
Bra039428.1	AT3G05560	-	60S ribosomal protein L22-2 (RPL22B)	A05	-	2	5.31652	0.0211242	0.367725
Bra032409.1	AT1G30620	HSR8,MUR4,UXE1	MUR4 (MURUS 4);UDP-arabinose 4-epimerase/ catalytic	A09	-	8	16.4722	0.0211353	0.367725
Bra037280.1	AT2G17220	-	protein kinase,putative	A09	-	6	13.2508	0.0211387	0.367725
Bra021774.1	AT2G32170	-	LOCATED IN: cellular_component unknown;EXPRESSED IN: 24 plant structures;EXPRESSED DURING: 15 growth stages;CONTAINS InterPro DOMAIN/s: N2227-like (InterPro:IPR012901);BEST Arabidopsis thaliana protein match is: unknown protein (TAIR:AT2G32160.3);Has 362 Blast hits to 319 proteins in 141 species: Archae - 0;Bacteria - 0;Metazoa - 132;Fungi - 130;Plants - 25;Viruses - 0;Other Eukaryotes - 75 (sour…	A04	+	18	30.7885	0.021188	0.368376
Bra039156.1	AT3G02125	-	unknown protein	A05	-	2	5.30905	0.0212149	0.368599
Bra003906.1	AT1G71880	SUC1,ATSUC1	SUC1 (Sucrose-proton symporter 1);carbohydrate transmembrane transporter/ sucrose:hydrogen symporter/ sugar:hydrogen symporter	A07	-	4	9.70738	0.0212245	0.368599
Bra006511.1	AT5G19600	SULTR3%3B5	SULTR3%3B5 (SULFATE TRANSPORTER 3%3B5);sulfate transmembrane transporter	A03	-	10	19.5033	0.0212377	0.368623
Bra001154.1	AT3G05560	-	60S ribosomal protein L22-2 (RPL22B)	A03	+	2	5.3013	0.0213095	0.369517
Bra027358.1	AT3G14210	ESM1	ESM1 (epithiospecifier modifier 1);carboxylesterase/ hydrolase,acting on ester bonds	A05	-	5	11.5187	0.021313	0.369517
Bra012110.1	AT5G66850	MAPKKK5	MAPKKK5;ATP binding / kinase/ protein kinase/ protein serine/threonine kinase	A07	+	11	20.964	0.0213462	0.369808
Bra030064.1	AT1G45191	BGLU1	BGLU1 (BETA GLUCOSIDASE 1);catalytic/ cation binding / hydrolase,hydrolyzing O-glycosyl compounds	A07	-	12	22.4142	0.0213536	0.369808
Bra005213.1	AT2G37200	-	integral membrane protein,putative	A05	+	8	16.4325	0.0214459	0.3712
Bra031157.1	AT2G20990	SYTA,NTMC2TYPE1.1,ATSYTA,NTMC2T1.1,SYT1	SYTA (SYNAPTOTAGMIN A)	A09	-	8	16.4299	0.0214663	0.371346
Bra031533.1	AT1G06650	-	2-oxoglutarate-dependent dioxygenase,putative	A09	-	3	7.67217	0.0215779	0.372745
Bra020249.1	AT5G60410	ATSIZ1,SIZ1	SIZ1;DNA binding / SUMO ligase	A02	-	15	26.6176	0.0215785	0.372745
Bra017053.1	AT2G39760	ATBPM3,BPM3	BPM3;protein binding	A04	+	4	9.67069	0.0215832	0.372745
Bra021079.1	AT4G16800	-	enoyl-CoA hydratase,putative	A08	-	15	26.6115	0.0216174	0.373129
Bra037991.1	AT1G55310	SR33,ATSCL33,SCL33	SR33;RNA binding / protein binding	A06	-	5	11.482	0.0216489	0.373373
Bra014334.1	AT2G01250	-	60S ribosomal protein L7 (RPL7B)	A08	-	6	13.1907	0.0216556	0.373373
Bra034087.1	AT3G09820	ADK1,ATADK1	ADK1 (adenosine kinase 1);adenosine kinase/ copper ion binding	A01	-	12	22.3684	0.0216697	0.373409
Bra030889.1	AT1G55080	-	unknown protein	A08	+	5	11.477	0.021695	0.373637
Bra034566.1	AT4G33520	PAA1,HMA6	PAA1 (P-TYPE ATP-ASE 1);ATPase,coupled to transmembrane movement of ions,phosphorylative mechanism / copper ion transmembrane transporter	A08	-	4	9.65591	0.0217293	0.37402
Bra007941.1	AT1G70760	CRR23	CRR23 ((chlororespiratory reduction 23)	A02	+	5	11.4673	0.0217852	0.374775
Bra022461.1	AT3G19840	-	FF domain-containing protein / WW domain-containing protein	A05	-	14	25.1862	0.0218165	0.374943
Bra021187.1	AT3G16640	TCTP	TCTP (TRANSLATIONALLY CONTROLLED TUMOR PROTEIN)	A01	+	4	9.64688	0.0218191	0.374943
Bra018249.1	AT2G31380	STH	STH;protein domain specific binding / transcription factor/ zinc ion binding	A05	-	3	7.63955	0.0219327	0.376523
Bra017967.1	AT3G49640	-	FAD binding / catalytic/ tRNA dihydrouridine synthase	A06	+	9	17.9056	0.0219456	0.376523
Bra021128.1	AT3G15690	-	biotin carboxyl carrier protein of acetyl-CoA carboxylase-related	A01	-	8	16.3694	0.0219474	0.376523
Bra014490.1	AT3G60420	-	LOCATED IN: cellular_component unknown;EXPRESSED IN: 17 plant structures;EXPRESSED DURING: 10 growth stages;CONTAINS InterPro DOMAIN/s: Phosphoglycerate mutase (InterPro:IPR013078),PRIB5 (InterPro:IPR012398);BEST Arabidopsis thaliana protein match is: unknown protein (TAIR:AT3G60450.1);Has 181 Blast hits to 179 proteins in 72 species: Archae - 0;Bacteria - 53;Metazoa - 4;Fungi - 34;Plants - 34;Vi…	A04	-	4	9.63217	0.021966	0.376635
Bra039021.1	AT2G19800	MIOX2	MIOX2 (MYO-INOSITOL OXYGENASE 2);inositol oxygenase	A07	+	11	20.8749	0.0219832	0.376722
Bra010225.1	AT1G26680	-	transcriptional factor B3 family protein	A08	+	10	19.3997	0.0220006	0.376813
Bra026702.1	AT1G16840	-	unknown protein	A09	+	2	5.24274	0.0220385	0.376874
Bra039003.1	AT2G19450	TAG1,AS11,ABX45,DGAT1,RDS1,ATDGAT	TAG1 (TRIACYLGLYCEROL BIOSYNTHESIS DEFECT 1);diacylglycerol O-acyltransferase	A07	-	15	26.5463	0.0220393	0.376874
Bra000583.1	AT2G21340	-	antiporter/ drug transporter	A03	-	12	22.3154	0.0220406	0.376874
Bra017145.1	AT2G37980	-	unknown protein	A04	-	7	14.7718	0.022108	0.377819
Bra010977.1	AT1G24735	-	O-methyltransferase	A08	+	5	11.4311	0.0221233	0.377872
Bra022288.1	AT3G18165	MOS4	MOS4 (Modifier of snc1%2C4)	A05	-	6	13.1275	0.0222129	0.379193
Bra023419.1	AT5G13520	-	peptidase M1 family protein	A02	-	4	9.60094	0.0222814	0.379998
Bra018463.1	AT1G10070	ATBCAT-2	ATBCAT-2 (ARABIDOPSIS THALIANA BRANCHED-CHAIN AMINO ACID TRANSAMINASE 2);branched-chain-amino-acid transaminase/ catalytic	A05	-	10	19.3611	0.0222916	0.379998
Bra001401.1	AT3G11400	EIF3G1,ATEIF3G1	eukaryotic translation initiation factor 3G / eIF3g	A03	+	2	5.22248	0.0222967	0.379998
Bra007917.1	AT1G70490	ATARFA1D,ARFA1D	ARFA1D;GTP binding / phospholipase activator/ protein binding	A02	-	6	13.1101	0.0223682	0.381007
Bra019807.1	AT3G26340	-	20S proteasome beta subunit E,putative	A06	-	7	14.7346	0.0224241	0.381751
Bra010933.1	AT1G27510	-	INVOLVED IN: response to singlet oxygen;LOCATED IN: thylakoid membrane;EXPRESSED IN: 22 plant structures;EXPRESSED DURING: 13 growth stages;BEST Arabidopsis thaliana protein match is: EX1 (EXECUTER1) (TAIR:AT4G33630.2);Has 213 Blast hits to 208 proteins in 76 species: Archae - 0;Bacteria - 13;Metazoa - 63;Fungi - 31;Plants - 69;Viruses - 0;Other Eukaryotes - 37 (source: NCBI BLink).	A08	+	11	20.8123	0.0224415	0.381837
Bra003692.1	AT1G77000	ATSKP2%3B2,SKP2B	SKP2B;ubiquitin-protein ligase	A07	-	4	9.58079	0.0224873	0.3821
Bra021392.1	AT2G47240	CER8,LACS1	long-chain-fatty-acid--CoA ligase family protein / long-chain acyl-CoA synthetase family protein	A01	-	17	29.2192	0.0224991	0.3821
Bra036619.1	AT5G27670	HTA7	HTA7 (HISTONE H2A 7);DNA binding	A09	+	2	5.2063	0.0225052	0.3821
Bra017371.1	AT2G03760	ST,ATST1,RAR047,ST1	ST;brassinosteroid sulfotransferase/ sulfotransferase	A09	+	2	5.20579	0.0225117	0.3821
Bra027772.1	AT2G16870	-	disease resistance protein (TIR-NBS-LRR class),putative	A09	-	6	13.0935	0.0225184	0.3821
Bra025920.1	AT1G18270	-	ketose-bisphosphate aldolase class-II family protein	A06	-	41	59.853	0.0225397	0.382252
Bra017881.1	AT5G42310	-	pentatricopeptide (PPR) repeat-containing protein	A03	-	4	9.56324	0.022668	0.384219
Bra021645.1	AT5G03495	-	nucleotide binding	A04	-	6	13.0727	0.022707	0.38467
Bra020454.1	AT5G57290	-	60S acidic ribosomal protein P3 (RPP3B)	A02	+	2	5.18852	0.0227365	0.384791
Bra025869.1	AT1G21060	-	unknown protein	A06	+	10	19.3025	0.0227404	0.384791
Bra003673.1	AT1G77700	-	pathogenesis-related thaumatin family protein	A07	-	3	7.56577	0.0227569	0.384791
Bra023647.1	AT5G17970	-	disease resistance protein (TIR-NBS-LRR class),putative	A02	-	4	9.5521	0.0227835	0.384791
Bra040136.1	AT3G04550	-	unknown protein	A01	-	2	5.18178	0.022825	0.384791
Bra033519.1	AT4G15850	ATRH1	ATRH1;ATP-dependent helicase/ DEAD/H-box RNA helicase binding	A01	-	9	17.7936	0.0228281	0.384791
Bra008386.1	AT1G78920	AVP2,AVPL1	AVP2 (ARABIDOPSIS VACUOLAR H+-PYROPHOSPHATASE 2);hydrogen-translocating pyrophosphatase	A02	+	14	25.0354	0.0228374	0.384791
Bra027183.1	AT3G16200	-	unknown protein	A05	+	4	9.54674	0.0228392	0.384791
Bra009398.1	AT5G09730	BXL3,ATBXL3,XYL3,ATBX3,BX3	BXL3 (beta-xylosidase 3);hydrolase,hydrolyzing O-glycosyl compounds	A10	-	6	13.0571	0.0228494	0.384791
Bra000811.1	AT4G05010	-	F-box family protein	A03	+	3	7.5566	0.0228615	0.384791
Bra029771.1	AT3G09500	-	60S ribosomal protein L35 (RPL35A)	A05	-	4	9.5422	0.0228866	0.384791
Bra031623.1	AT1G08340	-	rac GTPase activating protein,putative	A09	-	14	25.0283	0.0228866	0.384791
Bra025825.1	AT1G20540	-	transducin family protein / WD-40 repeat family protein	A06	+	13	23.6219	0.0228872	0.384791
Bra015806.1	AT1G75850	VPS35B	VPS35B (VPS35 HOMOLOG B)	A07	-	23	37.1305	0.0228876	0.384791
Bra004725.1	AT2G42680	MBF1A,ATMBF1A	MBF1A (MULTIPROTEIN BRIDGING FACTOR 1A);DNA binding / transcription coactivator	A05	-	4	9.53646	0.0229467	0.385338
Bra036263.1	AT4G02485	-	oxidoreductase,2OG-Fe(II) oxygenase family protein	A09	-	4	9.53581	0.0229534	0.385338
Bra003355.1	AT3G58750	CSY2	CSY2 (citrate synthase 2);citrate (SI)-synthase	A07	-	12	22.1877	0.0229591	0.385338
Bra023372.1	AT5G12330	LRP1	LRP1 (LATERAL ROOT PRIMORDIUM 1);protein homodimerization	A02	-	2	5.17079	0.0229697	0.385338
Bra008037.1	AT1G72520	-	lipoxygenase,putative	A02	+	6	13.038	0.0230254	0.38578
Bra022645.1	AT5G53300	UBC10	UBC10 (ubiquitin-conjugating enzyme 10);ubiquitin-protein ligase	A02	+	4	9.52831	0.0230321	0.38578
Bra005659.1	AT5G01010	-	EXPRESSED IN: 23 plant structures;EXPRESSED DURING: 14 growth stages;CONTAINS InterPro DOMAIN/s: GOLD (InterPro:IPR009038);Has 51 Blast hits to 51 proteins in 11 species: Archae - 0;Bacteria - 0;Metazoa - 8;Fungi - 0;Plants - 40;Viruses - 0;Other Eukaryotes - 3 (source: NCBI BLink).	A03	+	15	26.3972	0.0230333	0.38578
Bra034882.1	AT4G13250	-	short-chain dehydrogenase/reductase (SDR) family protein	A08	-	10	19.2613	0.0230607	0.385807
Bra035605.1	AT5G56150	UBC30	UBC30 (ubiquitin-conjugating enzyme 30);ubiquitin-protein ligase	A02	-	4	9.52451	0.0230721	0.385807
Bra000785.1	-	-	-	A03	+	3	7.53826	0.0230722	0.385807
Bra034020.1	AT1G67120	-	ATP binding / ATPase/ nucleoside-triphosphatase/ nucleotide binding / transcription factor binding	A02	-	60	82.5655	0.0231272	0.386518
Bra007174.1	AT3G55530	SDIR1	SDIR1 (SALT- AND DROUGHT-INDUCED RING FINGER1);protein binding / ubiquitin-protein ligase/ zinc ion binding	A09	-	8	16.2238	0.0231483	0.386612
Bra024634.1	AT1G24100	UGT74B1	UGT74B1 (UDP-glucosyl transferase 74B1);UDP-glycosyltransferase/ thiohydroximate beta-D-glucosyltransferase/ transferase,transferring glycosyl groups	A09	+	2	5.15664	0.0231576	0.386612
Bra026174.1	AT1G14970	-	unknown protein	A06	-	10	19.2454	0.0231851	0.386809
Bra001197.1	AT3G06420	ATG8H	ATG8H (autophagy 8h);microtubule binding	A03	-	5	11.319	0.0232031	0.386809
Bra028581.1	AT5G10520	RBK1	RBK1 (Rop Binding protein Kinases 1);ATP binding / kinase/ protein kinase/ protein serine/threonine kinase	A02	+	4	9.51174	0.0232068	0.386809
Bra034892.1	AT1G77230	-	tetratricopeptide repeat (TPR)-containing protein	A08	-	5	11.3137	0.0232557	0.387416
Bra036498.1	AT2G20740	-	FUNCTIONS IN: molecular_function unknown;INVOLVED IN: biological_process unknown;LOCATED IN: endomembrane system,integral to membrane;EXPRESSED IN: 23 plant structures;EXPRESSED DURING: 15 growth stages;CONTAINS InterPro DOMAIN/s: Tetraspanin (InterPro:IPR018499);BEST Arabidopsis thaliana protein match is: unknown protein (TAIR:AT2G20230.1);Has 91 Blast hits to 91 proteins in 11 species: Archae -…	A07	-	5	11.3073	0.0233194	0.388269
Bra031710.1	AT1G10410	-	INVOLVED IN: N-terminal protein myristoylation;LOCATED IN: chloroplast;EXPRESSED IN: 24 plant structures;EXPRESSED DURING: 15 growth stages;CONTAINS InterPro DOMAIN/s: Protein of unknown function DUF1336 (InterPro:IPR009769);BEST Arabidopsis thaliana protein match is: CW14 (TAIR:AT1G59650.1);Has 144 Blast hits to 144 proteins in 21 species: Archae - 0;Bacteria - 0;Metazoa - 9;Fungi - 2;Plants - 1…	A09	+	9	17.7302	0.0233431	0.38837
Bra022503.1	AT1G64970	G-TMT,TMT1,VTE4	G-TMT (GAMMA-TOCOPHEROL METHYLTRANSFERASE);tocopherol O-methyltransferase	A02	-	6	13.003	0.0233504	0.38837
Bra014277.1	AT4G12750	-	sequence-specific DNA binding / transcription factor	A08	-	13	23.5511	0.0233957	0.388914
Bra023976.1	AT1G72550	-	tRNA synthetase beta subunit family protein	A03	-	5	11.2955	0.0234361	0.389261
Bra000741.1	AT4G11260	ATSGT1B,ETA3,RPR1,EDM1,SGT1B	SGT1B;protein binding	A03	-	10	19.213	0.0234416	0.389261
Bra039489.1	AT5G36160	-	aminotransferase-related	A05	-	7	14.6029	0.0235805	0.391061
Bra009653.1	AT2G17290	CPK6,ATCDPK3	CPK6 (CALCIUM-DEPENDENT PROTEIN KINASE 6);ATP binding / calcium ion binding / calmodulin-dependent protein kinase/ kinase/ protein kinase/ protein serine/threonine kinase	A06	-	7	14.6016	0.0235919	0.391061
Bra010012.1	AT5G28900	-	calcium-binding EF hand family protein	A06	+	12	22.1007	0.0236046	0.391061
Bra030405.1	AT1G51980	-	mitochondrial processing peptidase alpha subunit,putative	A05	+	13	23.5217	0.0236098	0.391061
Bra022092.1	AT5G47030	-	ATP synthase delta' chain,mitochondrial	A02	+	2	5.12284	0.0236129	0.391061
Bra026671.1	AT2G01350	QPT	QPT (QUINOLINATE PHOSHORIBOSYLTRANSFERASE);nicotinate-nucleotide diphosphorylase (carboxylating)	A02	+	7	14.596	0.0236425	0.391209
Bra010791.1	AT1G30160	-	unknown protein	A08	+	3	7.48903	0.023647	0.391209
Bra018471.1	AT4G12320	CYP706A6	CYP706A6;electron carrier/ heme binding / iron ion binding / monooxygenase/ oxygen binding	A05	-	2	5.11513	0.023718	0.391917
Bra013665.1	AT4G22970	AESP	AESP (ARABIDOPSIS HOMOLOG OF SEPARASE);peptidase	A01	-	28	43.4169	0.0237318	0.391917
Bra024331.1	AT5G64830	-	programmed cell death 2 C-terminal domain-containing protein	A06	-	7	14.5847	0.0237443	0.391917
Bra036634.1	-	-	-	A09	+	4	9.46146	0.0237449	0.391917
Bra008197.1	AT1G75410	BLH3	BLH3 (BEL1-LIKE HOMEODOMAIN 3);DNA binding / transcription factor	A02	-	3	7.4801	0.0237529	0.391917
Bra023767.1	AT1G61000	-	FUNCTIONS IN: molecular_function unknown;INVOLVED IN: mitosis;LOCATED IN: plasma membrane;EXPRESSED IN: cultured cell;CONTAINS InterPro DOMAIN/s: Kinetochore protein Nuf2 (InterPro:IPR005549);BEST Arabidopsis thaliana protein match is: myosin heavy chain-related (TAIR:AT1G64330.1);Has 41010 Blast hits to 23184 proteins in 1264 species: Archae - 616;Bacteria - 3998;Metazoa - 20566;Fungi - 2893;Pla…	A01	+	2	5.1111	0.0237733	0.391927
Bra023844.1	AT4G23180	CRK10,RLK4	CRK10 (CYSTEINE-RICH RLK10);ATP binding / kinase/ protein kinase/ protein serine/threonine kinase/ protein tyrosine kinase	A01	-	7	14.5797	0.0237904	0.391927
Bra011654.1	AT4G36010	-	pathogenesis-related thaumatin family protein	A01	+	2	5.10909	0.0238008	0.391927
Bra030382.1	-	-	-	A05	+	2	5.10886	0.023804	0.391927
Bra009328.1	AT5G08190	NF-YB12	NF-YB12 (NUCLEAR FACTOR Y,SUBUNIT B12);DNA binding / transcription factor	A10	+	4	9.45449	0.0238205	0.391991
Bra026722.1	AT1G16360	-	LEM3 (ligand-effect modulator 3) family protein / CDC50 family protein	A09	+	9	17.6689	0.0238505	0.392277
Bra013679.1	AT4G23290	-	protein kinase family protein	A01	-	7	14.5693	0.0238845	0.392628
Bra015729.1	AT1G76630	-	tetratricopeptide repeat (TPR)-containing protein	A07	+	18	30.3424	0.0239788	0.393971
Bra024200.1	AT2G20580	RPN1A,ATRPN1A	RPN1A (26S PROTEASOME REGULATORY SUBUNIT S2 1A);binding / enzyme regulator	A03	-	22	35.6342	0.0240251	0.394471
Bra024417.1	AT5G65750	-	2-oxoglutarate dehydrogenase E1 component,putative / oxoglutarate decarboxylase,putative / alpha-ketoglutaric dehydrogenase,putative	A06	+	8	16.1196	0.0240455	0.394471
Bra022163.1	AT3G16490	IQD26	IQD26 (IQ-domain 26);calmodulin binding	A05	+	3	7.45546	0.0240474	0.394471
Bra035707.1	AT5G40170	AtRLP54	AtRLP54 (Receptor Like Protein 54);kinase/ protein binding	A04	-	2	5.08926	0.0240745	0.394652
Bra035716.1	AT5G50860	-	protein kinase family protein	A04	+	7	14.5475	0.0240838	0.394652
Bra005635.1	AT2G32060	-	40S ribosomal protein S12 (RPS12C)	A05	-	4	9.42898	0.024099	0.394693
Bra010687.1	AT4G39370	UBP27	UBP27 (UBIQUITIN-SPECIFIC PROTEASE 27);ubiquitin thiolesterase/ ubiquitin-specific protease	A08	-	8	16.1121	0.0241118	0.394694
Bra013237.1	AT3G25040	-	ER lumen protein retaining receptor,putative / HDEL receptor,putative	A03	+	6	12.9215	0.0241259	0.394717
Bra034779.1	AT3G12100	-	cation efflux family protein / metal tolerance protein,putative	A05	+	10	19.1247	0.0241529	0.394951
Bra022178.1	AT3G16785	PLDP1,PLDZ1,PLDZETA1,PLD ZETA 1	PLDP1 (PHOSPHOLIPASE D P1);phospholipase D	A05	-	19	31.65	0.0241795	0.395177
Bra037467.1	AT5G48680	-	sterile alpha motif (SAM) domain-containing protein	A06	-	6	12.9122	0.0242152	0.395288
Bra000149.1	AT2G39770	CYT1,VTC1,SOZ1,EMB101,GMP1	CYT1 (CYTOKINESIS DEFECTIVE 1);mannose-1-phosphate guanylyltransferase/ nucleotidyltransferase	A03	+	5	11.2179	0.024221	0.395288
Bra033379.1	AT1G03210	-	phenazine biosynthesis PhzC/PhzF family protein	A10	+	5	11.2164	0.0242363	0.395288
Bra023475.1	AT1G12940	ATNRT2.5	ATNRT2.5 (nitrate transporter2.5);nitrate transmembrane transporter	A02	-	2	5.07758	0.0242371	0.395288
Bra023513.1	AT5G15230	GASA4	GASA4 (GAST1 PROTEIN HOMOLOG 4)	A02	+	4	9.40969	0.0243117	0.396297
Bra026028.1	AT1G16740	-	ribosomal protein L20 family protein	A06	+	2	5.07085	0.0243314	0.396409
Bra011142.1	AT4G29860	EMB2757,TAN	EMB2757 (EMBRYO DEFECTIVE 2757);nucleotide binding	A01	+	13	23.4121	0.0244242	0.397712
Bra014755.1	AT3G55330	PPL1	PPL1 (PsbP-like protein 1);calcium ion binding	A04	+	8	16.0715	0.0244712	0.397773
Bra012525.1	AT2G35060	KUP11	KUP11;potassium ion transmembrane transporter	A03	+	5	11.1935	0.0244729	0.397773
Bra003076.1	AT5G53180	ATPTB2,PTB2	PTB2 (POLYPYRIMIDINE TRACT-BINDING PROTEIN 2);RNA binding / nucleic acid binding / nucleotide binding	A10	-	7	14.5048	0.0244782	0.397773
Bra000571.1	AT2G23810	TET8	TET8 (TETRASPANIN8)	A03	+	2	5.05873	0.0245021	0.397773
Bra037473.1	AT5G48640	-	cyclin family protein	A06	-	8	16.0679	0.0245033	0.397773
Bra025236.1	AT3G26922	-	FUNCTIONS IN: molecular_function unknown;INVOLVED IN: biological_process unknown;LOCATED IN: cellular_component unknown;CONTAINS InterPro DOMAIN/s: Cyclin-like F-box (InterPro:IPR001810),Leucine-rich repeat 2 (InterPro:IPR013101);BEST Arabidopsis thaliana protein match is: F-box family protein (TAIR:AT3G52680.2).	A06	-	4	9.3918	0.0245108	0.397773
Bra007685.1	AT3G62580	-	FUNCTIONS IN: molecular_function unknown;INVOLVED IN: biological_process unknown;LOCATED IN: endomembrane system;EXPRESSED IN: 23 plant structures;EXPRESSED DURING: 13 growth stages;BEST Arabidopsis thaliana protein match is: late embryogenesis abundant domain-containing protein / LEA domain-containing protein (TAIR:AT1G72100.1);Has 237 Blast hits to 236 proteins in 85 species: Archae - 0;Bacteri…	A09	+	3	7.41673	0.0245176	0.397773
Bra030486.1	AT1G50500	HIT1,ATVPS53,VPS53	HIT1 (HEAT-INTOLERANT 1);transporter	A05	+	23	36.8515	0.0245588	0.398234
Bra040324.1	AT2G45130	ATSPX3,SPX3	SPX3 (SPX DOMAIN GENE 3)	A04	-	3	7.41184	0.0245776	0.39825
Bra021352.1	-	-	-	A01	+	8	16.0587	0.0245854	0.39825
Bra030419.1	AT1G51760	IAR3,JR3	IAR3 (IAA-ALANINE RESISTANT 3);IAA-Ala conjugate hydrolase/ metallopeptidase	A05	-	5	11.1799	0.0246149	0.398258
Bra032544.1	AT1G03750	CHR9	SWI2 (SWITCH 2);ATP binding / DNA binding / helicase/ nucleic acid binding	A09	-	12	21.9674	0.024627	0.398258
Bra038520.1	AT2G22475	GEM	GEM (GL2-EXPRESSION MODULATOR)	A09	-	4	9.38079	0.024634	0.398258
Bra039480.1	AT4G13330	-	unknown protein	A05	+	4	9.37926	0.0246512	0.398258
Bra038015.1	AT1G55820	-	FUNCTIONS IN: molecular_function unknown;INVOLVED IN: biological_process unknown;LOCATED IN: cellular_component unknown;EXPRESSED IN: 8 plant structures;EXPRESSED DURING: F mature embryo stage,petal differentiation and expansion stage,D bilateral stage,E expanded cotyledon stage;CONTAINS InterPro DOMAIN/s: Protein of unknown function DUF1296 (InterPro:IPR009719);BEST Arabidopsis thaliana protein …	A06	-	9	17.5735	0.0246615	0.398258
Bra016169.1	AT1G71000	-	heat shock protein binding	A07	-	5	11.1753	0.0246628	0.398258
Bra023169.1	AT1G31230	AK-HSDH I,AK-HSDH	AK-HSDH I (ASPARTATE KINASE-HOMOSERINE DEHYDROGENASE I);aspartate kinase/ homoserine dehydrogenase	A09	+	17	28.8904	0.024686	0.398382
Bra005702.1	AT5G08420	-	RNA binding	A03	-	4	9.37526	0.0246961	0.398382
Bra007039.1	AT3G54000	-	FUNCTIONS IN: molecular_function unknown;INVOLVED IN: biological_process unknown;LOCATED IN: cellular_component unknown;EXPRESSED IN: 22 plant structures;EXPRESSED DURING: 12 growth stages;CONTAINS InterPro DOMAIN/s: Uncharacterised conserved protein UCP022260 (InterPro:IPR016802);BEST Arabidopsis thaliana protein match is: unknown protein (TAIR:AT5G59050.1);Has 43 Blast hits to 43 proteins in 9 …	A09	+	5	11.1697	0.0247216	0.398513
Bra036796.1	AT3G51470	-	protein phosphatase 2C,putative / PP2C,putative	A09	-	2	5.0427	0.0247299	0.398513
Bra008608.1	AT5G16620	PDE120,TIC40,ATTIC40	TIC40	A10	-	14	24.7653	0.0247777	0.399076
Bra009235.1	AT5G06860	PGIP1,ATPGIP1	PGIP1 (POLYGALACTURONASE INHIBITING PROTEIN 1);protein binding	A10	+	2	5.0383	0.0247928	0.399113
Bra008296.1	AT1G77220	-	unknown protein	A02	+	6	12.8508	0.0248177	0.39919
Bra025070.1	AT5G45590	-	unknown protein	A06	+	4	9.36398	0.0248233	0.39919
Bra040604.1	AT3G02830	ZFN1	ZFN1 (ZINC FINGER PROTEIN 1);DNA binding / nuclease/ nucleic acid binding	A05	-	7	14.4614	0.024886	0.399867
Bra038439.1	AT1G31812	ACBP6,ACBP	ACBP6 (acyl-CoA-binding protein 6);acyl-CoA binding / phosphatidylcholine binding	A08	+	4	9.35796	0.0248914	0.399867
Bra033611.1	AT4G39270	-	leucine-rich repeat transmembrane protein kinase,putative	A06	-	6	12.8421	0.024904	0.399867
Bra030505.1	AT4G02075	PIT1	PIT1 (pitchoun 1);protein binding / zinc ion binding	A08	+	7	14.4552	0.0249445	0.400189
Bra019085.1	AT4G26780	AR192	AR192;adenyl-nucleotide exchange factor/ chaperone binding / protein binding / protein homodimerization	A03	-	5	11.1478	0.0249518	0.400189
Bra003221.1	AT3G55800	SBPASE	SBPASE (sedoheptulose-bisphosphatase);phosphoric ester hydrolase/ sedoheptulose-bisphosphatase	A07	+	6	12.8362	0.0249627	0.400189
Bra009031.1	AT5G10440	CYCD4%3B2	CYCD4%3B2 (cyclin d4%3B2);cyclin-dependent protein kinase	A10	+	6	12.8347	0.0249777	0.400224
Bra038384.1	AT4G09150	-	T-complex protein 11	A09	+	12	21.9191	0.0250073	0.400491
Bra021715.1	AT1G06150	-	transcription factor	A04	+	14	24.7308	0.0250362	0.400747
Bra018972.1	AT1G52560	-	26.5 kDa class I small heat shock protein-like (HSP26.5-P)	A06	+	2	5.01875	0.0250743	0.400979
Bra031013.1	AT1G18040	CDKD1%3B3,AT%3BCDCKD%3B3,CAK2AT	CDKD1%3B3 (CYCLIN-DEPENDENT KINASE D1%3B3);kinase/ protein kinase	A09	+	6	12.8249	0.0250765	0.400979
Bra016787.1	AT1G12140	FMO GS-OX5	FMO GS-OX5 (FLAVIN-MONOOXYGENASE GLUCOSINOLATE S-OXYGENASE 5);8-methylthiopropyl glucosinolate S-oxygenase/ flavin-containing monooxygenase/ monooxygenase	A08	-	4	9.3378	0.025121	0.401484
Bra016399.1	AT1G21920	-	MORN (Membrane Occupation and Recognition Nexus) repeat-containing protein /phosphatidylinositol-4-phosphate 5-kinase-related	A08	+	2	5.0136	0.0251489	0.401723
Bra005880.1	AT5G06150	CYC1BAT,CYCB1%3B2	CYC1BAT;cyclin-dependent protein kinase regulator	A03	-	5	11.121	0.025237	0.402783
Bra002725.1	AT5G57490	VDAC4,ATVDAC4	VDAC4 (VOLTAGE DEPENDENT ANION CHANNEL 4);voltage-gated anion channel	A10	-	4	9.32732	0.0252412	0.402783
Bra012607.1	AT4G18260	-	cytochrome B561-related	A03	-	4	9.32574	0.0252593	0.402831
Bra012111.1	AT5G66860	-	INVOLVED IN: translation;LOCATED IN: mitochondrion;CONTAINS InterPro DOMAIN/s: Ribosomal protein L25/Gln-tRNA synthetase,anti-codon-binding (InterPro:IPR011035);BEST Arabidopsis thaliana protein match is: 50S ribosomal protein-related (TAIR:AT4G23620.1);Has 2346 Blast hits to 2345 proteins in 433 species: Archae - 0;Bacteria - 930;Metazoa - 0;Fungi - 0;Plants - 41;Viruses - 0;Other Eukaryotes - 1…	A07	+	3	7.35626	0.0252701	0.402831
Bra005240.1	AT2G36835	-	unknown protein	A05	+	4	9.3163	0.0253681	0.404064
Bra037773.1	AT5G64330	NPH3,RPT3,JK218	NPH3 (NON-PHOTOTROPIC HYPOCOTYL 3);protein binding / signal transducer	A09	+	6	12.7954	0.0253735	0.404064
Bra024559.1	AT1G23030	-	armadillo/beta-catenin repeat family protein / U-box domain-containing protein	A09	-	4	9.3143	0.0253912	0.404139
Bra021754.1	AT1G63730	-	disease resistance protein (TIR-NBS-LRR class),putative	A04	-	4	9.30805	0.0254635	0.404806
Bra017147.1	AT1G02050	-	chalcone and stilbene synthase family protein	A04	-	8	15.9615	0.0254703	0.404806
Bra030899.1	AT1G54160	NFYA5,NF-YA5	NF-YA5 (NUCLEAR FACTOR Y,SUBUNIT A5);specific transcriptional repressor/ transcription factor	A08	+	4	9.30632	0.0254836	0.404806
Bra036167.1	AT5G48500	-	unknown protein	A09	+	4	9.3048	0.0255013	0.404806
Bra005448.1	AT2G34170	-	unknown protein	A05	-	2	4.9891	0.0255074	0.404806
Bra024068.1	AT4G30530	-	defense-related protein,putative	A03	+	3	7.33727	0.0255113	0.404806
Bra002502.1	AT5G60250	-	zinc finger (C3HC4-type RING finger) family protein	A10	+	5	11.0923	0.0255458	0.405146
Bra003865.1	AT1G72880	-	acid phosphatase survival protein SurE,putative	A07	+	10	18.9523	0.0256012	0.405817
Bra038534.1	AT2G22300	CAMTA3,SR1	SR1 (SIGNAL RESPONSIVE 1);calmodulin binding / transcription regulator	A09	-	10	18.9507	0.0256158	0.405842
Bra009342.1	AT5G08470	PEX1	PEX1 (peroxisome 1);ATP binding / ATPase/ binding / nucleoside-triphosphatase/ nucleotide binding / protein binding	A10	+	17	28.7396	0.0257523	0.407694
Bra025523.1	AT5G41070	DRB5	DRB5 (DSRNA-BINDING PROTEIN 5);double-stranded RNA binding	A04	+	3	7.31795	0.0257589	0.407694
Bra003633.1	AT1G78900	VHA-A	VHA-A (VACUOLAR ATP SYNTHASE SUBUNIT A);ATP binding / hydrogen ion transporting ATP synthase,rotational mechanism / hydrolase,acting on acid anhydrides,catalyzing transmembrane movement of substances / proton-transporting ATPase,rotational mechanism	A07	-	20	32.7329	0.0258015	0.40816
Bra028459.1	AT5G40450	-	unknown protein	A02	-	16	27.3678	0.0258785	0.408999
Bra021482.1	AT3G01090	AKIN10,KIN10	AKIN10 (Arabidopsis SNF1 kinase homolog 10);protein binding / protein kinase	A01	+	9	17.4355	0.0258808	0.408999
Bra018323.1	AT2G30280	-	unknown protein	A05	+	9	17.4324	0.0259084	0.409226
Bra010627.1	AT4G37990	ELI3-2,ELI3,ATCAD8,CAD-B2	ELI3-2 (ELICITOR-ACTIVATED GENE 3-2);aryl-alcohol dehydrogenase/ mannitol dehydrogenase	A08	+	4	9.26826	0.0259289	0.409314
Bra005917.1	AT5G06870	PGIP2,ATPGIP2	PGIP2 (POLYGALACTURONASE INHIBITING PROTEIN 2);protein binding	A03	+	2	4.95999	0.0259403	0.409314
Bra007015.1	AT1G06840	-	leucine-rich repeat transmembrane protein kinase,putative	A09	-	20	32.7043	0.0259973	0.410005
Bra038652.1	AT5G63650	SNRK2-5,SNRK2.5,SRK2H	SNRK2.5 (SNF1-RELATED PROTEIN KINASE 2.5);kinase	A06	-	8	15.9007	0.0260394	0.410461
Bra018762.1	AT1G48920	ATNUC-L1,PARL1	ATNUC-L1;nucleic acid binding / nucleotide binding	A06	-	18	30.0399	0.0260589	0.41056
Bra032658.1	AT1G01950	ARK2	armadillo/beta-catenin repeat family protein / kinesin motor family protein	A09	+	17	28.6901	0.0261114	0.4108
Bra028502.1	AT5G41680	-	protein kinase family protein	A02	+	3	7.2895	0.026128	0.4108
Bra022073.1	AT5G46860	VAM3,ATVAM3,SYP22,ATSYP22,SGR3	VAM3;SNAP receptor	A02	-	7	14.3317	0.0261422	0.4108
Bra011270.1	AT2G24500	FZF	FZF;transcription factor	A01	+	5	11.0374	0.0261464	0.4108
Bra019658.1	AT1G14350	FLP,AtMYB124,MYB124	FLP (FOUR LIPS);DNA binding / transcription factor	A06	+	10	18.8897	0.026147	0.4108
Bra037150.1	AT5G66750	DDM1,CHR01,CHR1,CHA1,SOM4,SOM1,ATDDM1	CHR1 (CHROMATIN REMODELING 1);ATPase/ helicase	A09	+	25	39.1767	0.0261652	0.4108
Bra027480.1	AT5G43290	WRKY49,ATWRKY49	WRKY49;transcription factor	A09	+	3	7.28568	0.0261779	0.4108
Bra001863.1	AT3G22300	RPS10	RPS10 (RIBOSOMAL PROTEIN S10);structural constituent of ribosome	A03	+	2	4.9441	0.0261799	0.4108
Bra033566.1	AT4G38520	-	protein phosphatase 2C family protein / PP2C family protein	A06	+	5	11.031	0.0262175	0.410894
Bra020215.1	AT5G22800	EMB1030	EMB1030 (EMBRYO DEFECTIVE 1030);ATP binding / alanine-tRNA ligase/ ligase,forming aminoacyl-tRNA and related compounds / nucleic acid binding / nucleotide binding	A02	-	8	15.8802	0.0262337	0.410894
Bra007106.1	AT3G54860	ATVPS33,VPS33	vacuolar protein sorting protein,putative	A09	-	22	35.2878	0.0262479	0.410894
Bra022453.1	AT3G19780	-	LOCATED IN: endomembrane system;CONTAINS InterPro DOMAIN/s: Protein of unknown function DUF179 (InterPro:IPR003774),Thioredoxin fold (InterPro:IPR012335),Thioredoxin-like fold (InterPro:IPR012336);BEST Arabidopsis thaliana protein match is: unknown protein (TAIR:AT1G33780.1);Has 371 Blast hits to 359 proteins in 101 species: Archae - 0;Bacteria - 90;Metazoa - 100;Fungi - 6;Plants - 72;Viruses - 0…	A05	-	8	15.8782	0.0262524	0.410894
Bra017432.1	AT2G01940	SGR5,ATIDD15	nucleic acid binding / transcription factor/ zinc ion binding	A09	-	3	7.27936	0.0262608	0.410894
Bra024277.1	AT5G64240	AtMC3	AtMC3 (metacaspase 3);cysteine-type endopeptidase	A06	+	5	11.0267	0.0262653	0.410894
Bra006036.1	AT5G09870	CESA5	CESA5 (CELLULOSE SYNTHASE 5);cellulose synthase/ transferase,transferring glycosyl groups	A03	+	13	23.1713	0.0263063	0.411087
Bra007982.1	AT1G71380	ATGH9B3,ATCEL3	ATCEL3 (ARABIDOPSIS THALIANA CELLULASE 3);catalytic/ hydrolase,hydrolyzing O-glycosyl compounds	A02	+	5	11.023	0.0263069	0.411087
Bra040100.1	AT4G16830	-	nuclear RNA-binding protein (RGGA)	A01	-	7	14.3141	0.0263173	0.411087
Bra017086.1	AT2G39200	MLO12,ATMLO12	MLO12 (MILDEW RESISTANCE LOCUS O 12);calmodulin binding	A04	-	14	24.5558	0.0263863	0.411958
Bra040234.1	AT3G06120	MUTE	MUTE (MUTE);DNA binding / transcription factor	A01	-	3	7.26455	0.026456	0.412838
Bra027721.1	-	-	-	A09	-	3	7.26337	0.0264715	0.412873
Bra013957.1	AT5G17700	-	MATE efflux family protein	A08	-	8	15.8523	0.0265009	0.413095
Bra008911.1	AT5G12150	-	pleckstrin homology (PH) domain-containing protein / RhoGAP domain-containing protein	A10	+	22	35.2484	0.0265123	0.413095
Bra004537.1	AT2G46430	ATCNGC3,CNGC3,CNGC3.C	ATCNGC3 (CYCLIC NUCLEOTIDE GATED CHANNEL 3);calmodulin binding / cyclic nucleotide binding / ion channel	A05	-	7	14.2877	0.0265826	0.413983
Bra026399.1	AT4G26840	SUM1,SUMO 1,SUMO1,ATSUMO1	SUMO1 (SMALL UBIQUITIN-LIKE MODIFIER 1);protein binding / protein tag	A01	+	3	7.25397	0.0265962	0.413987
Bra033983.1	AT1G67730	YBR159,KCR1	YBR159;ketoreductase/ oxidoreductase	A02	+	3	7.24431	0.026725	0.415783
Bra023317.1	AT5G11260	HY5,TED 5	HY5 (ELONGATED HYPOCOTYL 5);DNA binding / double-stranded DNA binding / transcription factor	A02	-	4	9.20025	0.0267436	0.415864
Bra001037.1	AT3G02230	RGP1,ATRGP1	RGP1 (REVERSIBLY GLYCOSYLATED POLYPEPTIDE 1);cellulose synthase (UDP-forming)	A03	+	4	9.19697	0.0267835	0.41608
[truncated: 29,070 more rows]
