# Supplementary material for: BrPP5.2 Overexpression Confers Heat Shock Tolerance in Transgenic Brassica rapa through Inherent Chaperone Activity, Induced Glucosinolate Biosynthesis, and Differential Regulation of Abiotic Stress Response Genes
Source: Int J Mol Sci. 2021 Jun 16;22(12):6437. doi: 10.3390/ijms22126437 (PMC8234546; doi:10.3390/ijms22126437)
Supplement: Supplementary file 1 [file ijms-22-06437-s001.zip › All in one for heatmap data.xlsx]

## Sheet: Sheet1
Gene_ID	Temp.	Photosyn.	Light	Gibberelllin	Water depri.	Heat	Ethylene	ABA	Circadian	Glucosinolate	Salicylic	Jasmonate	Cold	defense	Cell stress	Oxidative	salt stress	osmoticstress
Bra037845	-2.45345	#N/A	#N/A	#N/A	#N/A	#N/A	#N/A	-2.45345	#N/A	#N/A	#N/A	#N/A	-2.45345	#N/A	#N/A	#N/A	-2.45345	-2.45345
Bra029258	-2.333	#N/A	#N/A	#N/A	-2.333	#N/A	#N/A	-2.333	#N/A	#N/A	-2.333	#N/A	-2.333	-2.333	#N/A	#N/A	-2.333	-2.333
Bra029292	-4.13052	#N/A	#N/A	#N/A	#N/A	-4.13052	#N/A	#N/A	#N/A	#N/A	#N/A	#N/A	#N/A	#N/A	-4.13052	#N/A	#N/A	#N/A
Bra029301	-2.14694	#N/A	#N/A	#N/A	#N/A	#N/A	#N/A	#N/A	#N/A	#N/A	#N/A	#N/A	#N/A	-2.14694	#N/A	#N/A	#N/A	#N/A
Bra029309	2.07297	#N/A	#N/A	#N/A	#N/A	2.07297	#N/A	#N/A	#N/A	#N/A	#N/A	#N/A	#N/A	#N/A	2.07297	#N/A	2.07297	2.07297
Bra006692	-2.46053	#N/A	-2.46053	#N/A	#N/A	-2.46053	#N/A	#N/A	#N/A	#N/A	#N/A	#N/A	-2.46053	#N/A	-2.46053	-2.46053	-2.46053	-2.46053
Bra006749	2.31478	#N/A	#N/A	#N/A	2.31478	#N/A	#N/A	2.31478	#N/A	#N/A	#N/A	#N/A	2.31478	#N/A	#N/A	#N/A	2.31478	2.31478
Bra010292	2.14932	#N/A	#N/A	#N/A	#N/A	2.14932	#N/A	#N/A	#N/A	#N/A	#N/A	#N/A	2.14932	#N/A	2.14932	#N/A	#N/A	#N/A
Bra022722	-2.2994	#N/A	#N/A	#N/A	#N/A	#N/A	#N/A	#N/A	#N/A	#N/A	#N/A	#N/A	-2.2994	#N/A	-2.2994	#N/A	#N/A	#N/A
Bra035732	-2.19088	#N/A	#N/A	#N/A	#N/A	-2.19088	-2.19088	#N/A	#N/A	#N/A	#N/A	#N/A	#N/A	#N/A	#N/A	#N/A	#N/A	#N/A
Bra037477	-3.06229	#N/A	#N/A	#N/A	#N/A	-3.06229	#N/A	#N/A	#N/A	#N/A	#N/A	#N/A	#N/A	#N/A	-3.06229	#N/A	#N/A	#N/A
Bra024953	-2.90961	#N/A	#N/A	#N/A	#N/A	#N/A	-2.90961	#N/A	#N/A	#N/A	#N/A	#N/A	-2.90961	-2.90961	#N/A	#N/A	#N/A	#N/A
Bra033648	5.79749	#N/A	5.79749	#N/A	#N/A	#N/A	#N/A	5.79749	5.79749	#N/A	#N/A	#N/A	5.79749	#N/A	#N/A	#N/A	#N/A	#N/A
Bra025439	-2.82935	#N/A	-2.82935	#N/A	#N/A	-2.82935	#N/A	-2.82935	#N/A	#N/A	#N/A	#N/A	-2.82935	-2.82935	#N/A	-2.82935	#N/A	#N/A
Bra006567	4.2334	#N/A	#N/A	#N/A	#N/A	#N/A	#N/A	#N/A	#N/A	#N/A	#N/A	#N/A	4.2334	#N/A	#N/A	#N/A	#N/A	#N/A
Bra002283	-3.7908	#N/A	-3.7908	#N/A	#N/A	#N/A	#N/A	#N/A	#N/A	#N/A	#N/A	#N/A	-3.7908	#N/A	-3.7908	-3.7908	#N/A	#N/A
Bra006195	2.57512	#N/A	#N/A	#N/A	2.57512	#N/A	2.57512	2.57512	#N/A	2.57512	2.57512	2.57512	2.57512	#N/A	2.57512	#N/A	2.57512	2.57512
Bra008920	-3.25852	#N/A	#N/A	#N/A	#N/A	-3.25852	#N/A	#N/A	#N/A	#N/A	#N/A	#N/A	#N/A	#N/A	-3.25852	-3.25852	-3.25852	-3.25852
Bra028759	-2.36305	#N/A	-2.36305	#N/A	-2.36305	-2.36305	#N/A	#N/A	#N/A	#N/A	#N/A	#N/A	#N/A	#N/A	-2.36305	-2.36305	#N/A	#N/A
Bra011891	2.0934	#N/A	#N/A	#N/A	#N/A	#N/A	#N/A	#N/A	#N/A	#N/A	#N/A	#N/A	2.0934	#N/A	#N/A	#N/A	#N/A	#N/A
Bra033570	-2.80361	#N/A	#N/A	#N/A	#N/A	-2.80361	#N/A	#N/A	#N/A	#N/A	#N/A	#N/A	#N/A	#N/A	#N/A	#N/A	#N/A	#N/A
Bra017839	-3.48029	#N/A	#N/A	#N/A	#N/A	#N/A	#N/A	#N/A	#N/A	#N/A	-3.48029	#N/A	-3.48029	#N/A	#N/A	-3.48029	#N/A	#N/A
Bra009229	-2.29491	#N/A	#N/A	#N/A	#N/A	#N/A	#N/A	-2.29491	#N/A	#N/A	#N/A	-2.29491	-2.29491	#N/A	#N/A	-2.29491	-2.29491	-2.29491
Bra017628	-3.42827	#N/A	#N/A	#N/A	#N/A	#N/A	#N/A	#N/A	#N/A	#N/A	#N/A	#N/A	-3.42827	#N/A	-3.42827	#N/A	#N/A	#N/A
Bra034595	4.66053	#N/A	4.66053	#N/A	#N/A	#N/A	#N/A	4.66053	4.66053	#N/A	#N/A	#N/A	4.66053	#N/A	#N/A	#N/A	#N/A	#N/A
Bra026317	-2.16347	#N/A	-2.16347	#N/A	#N/A	-2.16347	#N/A	#N/A	#N/A	#N/A	#N/A	#N/A	#N/A	#N/A	#N/A	-2.16347	#N/A	#N/A
Bra010441	2.06747	#N/A	#N/A	#N/A	#N/A	2.06747	#N/A	2.06747	#N/A	#N/A	#N/A	#N/A	2.06747	#N/A	#N/A	#N/A	#N/A	#N/A
Bra019162	-2.51408	#N/A	#N/A	#N/A	#N/A	#N/A	#N/A	#N/A	#N/A	#N/A	#N/A	#N/A	-2.51408	#N/A	#N/A	#N/A	#N/A	#N/A
Bra020865	3.09006	#N/A	#N/A	#N/A	#N/A	3.09006	#N/A	#N/A	#N/A	#N/A	#N/A	#N/A	#N/A	#N/A	#N/A	3.09006	3.09006	3.09006
Bra040169	-4.44398	#N/A	#N/A	#N/A	-4.44398	#N/A	#N/A	-4.44398	#N/A	#N/A	#N/A	#N/A	-4.44398	#N/A	#N/A	#N/A	-4.44398	-4.44398
Bra026230	2.25682	#N/A	#N/A	#N/A	#N/A	#N/A	#N/A	#N/A	#N/A	#N/A	#N/A	#N/A	2.25682	#N/A	#N/A	#N/A	#N/A	#N/A
Bra000775	3.59572	#N/A	#N/A	#N/A	#N/A	#N/A	#N/A	3.59572	#N/A	#N/A	#N/A	#N/A	3.59572	3.59572	#N/A	#N/A	3.59572	3.59572
Bra018477	-3.13477	#N/A	-3.13477	#N/A	#N/A	-3.13477	#N/A	#N/A	#N/A	#N/A	#N/A	#N/A	#N/A	#N/A	#N/A	-3.13477	#N/A	#N/A
Bra039693	2.12154	#N/A	#N/A	#N/A	#N/A	#N/A	#N/A	#N/A	#N/A	#N/A	#N/A	#N/A	2.12154	2.12154	2.12154	#N/A	2.12154	2.12154
Bra000876	4.31664	#N/A	#N/A	#N/A	#N/A	#N/A	#N/A	#N/A	#N/A	#N/A	#N/A	#N/A	4.31664	4.31664	#N/A	#N/A	4.31664	4.31664
Bra036278	-2.49317	#N/A	#N/A	#N/A	#N/A	#N/A	#N/A	#N/A	#N/A	#N/A	#N/A	#N/A	-2.49317	#N/A	#N/A	#N/A	#N/A	#N/A
Bra014430	-2.20482	#N/A	#N/A	#N/A	#N/A	#N/A	#N/A	#N/A	#N/A	#N/A	#N/A	#N/A	-2.20482	#N/A	-2.20482	#N/A	#N/A	#N/A
Bra007315	3.91011	#N/A	#N/A	#N/A	#N/A	#N/A	#N/A	#N/A	#N/A	#N/A	#N/A	#N/A	3.91011	3.91011	#N/A	#N/A	#N/A	#N/A
Bra007205	-3.40209	#N/A	#N/A	#N/A	#N/A	#N/A	#N/A	#N/A	#N/A	#N/A	#N/A	#N/A	-3.40209	-3.40209	-3.40209	#N/A	#N/A	#N/A
Bra007177	-5.94674	#N/A	#N/A	#N/A	#N/A	#N/A	#N/A	#N/A	#N/A	#N/A	#N/A	#N/A	-5.94674	#N/A	-5.94674	#N/A	#N/A	#N/A
Bra012828	-3.62574	#N/A	-3.62574	#N/A	#N/A	-3.62574	#N/A	#N/A	#N/A	#N/A	#N/A	#N/A	#N/A	#N/A	-3.62574	#N/A	#N/A	#N/A
Bra019599	-3.10933	#N/A	#N/A	#N/A	#N/A	#N/A	#N/A	#N/A	#N/A	#N/A	#N/A	#N/A	-3.10933	-3.10933	-3.10933	#N/A	#N/A	#N/A
Bra018065	4.9916	#N/A	#N/A	#N/A	#N/A	#N/A	#N/A	4.9916	4.9916	#N/A	4.9916	4.9916	4.9916	#N/A	#N/A	4.9916	4.9916	4.9916
Bra038281	-2.33328	#N/A	-2.33328	#N/A	-2.33328	#N/A	#N/A	-2.33328	#N/A	#N/A	#N/A	#N/A	-2.33328	-2.33328	-2.33328	-2.33328	-2.33328	-2.33328
Bra025297	-5.0703	-5.0703	-5.0703	#N/A	-5.0703	#N/A	#N/A	-5.0703	#N/A	#N/A	#N/A	#N/A	-5.0703	#N/A	#N/A	#N/A	#N/A	#N/A
Bra017351	3.10252	#N/A	#N/A	#N/A	#N/A	#N/A	#N/A	#N/A	#N/A	#N/A	#N/A	#N/A	3.10252	#N/A	#N/A	#N/A	#N/A	#N/A
Bra015048	-2.84921	#N/A	#N/A	#N/A	-2.84921	-2.84921	-2.84921	-2.84921	#N/A	#N/A	#N/A	#N/A	#N/A	#N/A	-2.84921	#N/A	#N/A	#N/A
Bra001907	-3.59904	#N/A	#N/A	#N/A	-3.59904	#N/A	-3.59904	#N/A	#N/A	#N/A	#N/A	-3.59904	-3.59904	#N/A	#N/A	#N/A	-3.59904	-3.59904
Bra001885	-2.30077	#N/A	#N/A	#N/A	#N/A	-2.30077	#N/A	#N/A	#N/A	#N/A	#N/A	#N/A	#N/A	#N/A	-2.30077	#N/A	#N/A	#N/A
Bra031349	2.18045	#N/A	#N/A	#N/A	2.18045	#N/A	#N/A	#N/A	#N/A	#N/A	#N/A	#N/A	2.18045	#N/A	#N/A	#N/A	2.18045	2.18045
Bra022161	2.39904	#N/A	#N/A	#N/A	#N/A	#N/A	#N/A	#N/A	#N/A	#N/A	#N/A	2.39904	2.39904	#N/A	#N/A	#N/A	2.39904	2.39904
Bra027359	-2.6033	#N/A	#N/A	#N/A	#N/A	#N/A	#N/A	#N/A	#N/A	-2.6033	#N/A	#N/A	-2.6033	-2.6033	#N/A	#N/A	#N/A	#N/A
Bra038734	-2.83406	#N/A	-2.83406	#N/A	#N/A	-2.83406	#N/A	#N/A	#N/A	#N/A	#N/A	#N/A	#N/A	#N/A	-2.83406	-2.83406	#N/A	#N/A
Bra034845	-2.45719	#N/A	#N/A	#N/A	-2.45719	#N/A	#N/A	-2.45719	#N/A	#N/A	#N/A	#N/A	-2.45719	#N/A	#N/A	#N/A	#N/A	#N/A
Bra029889	-2.26849	#N/A	#N/A	#N/A	#N/A	-2.26849	#N/A	#N/A	#N/A	#N/A	#N/A	#N/A	#N/A	#N/A	#N/A	#N/A	#N/A	#N/A
Bra001320	-2.21194	#N/A	#N/A	#N/A	#N/A	#N/A	#N/A	#N/A	#N/A	-2.21194	#N/A	#N/A	-2.21194	-2.21194	-2.21194	#N/A	-2.21194	-2.21194
Bra029712	-2.6051	#N/A	#N/A	#N/A	#N/A	-2.6051	#N/A	#N/A	#N/A	#N/A	#N/A	#N/A	-2.6051	#N/A	-2.6051	#N/A	-2.6051	-2.6051
Bra004503	-4.70998	#N/A	-4.70998	-4.70998	#N/A	#N/A	-4.70998	-4.70998	-4.70998	#N/A	-4.70998	-4.70998	-4.70998	#N/A	#N/A	#N/A	-4.70998	-4.70998
Bra014527	-3.63281	#N/A	-3.63281	#N/A	#N/A	#N/A	-3.63281	-3.63281	#N/A	#N/A	#N/A	-3.63281	-3.63281	-3.63281	-3.63281	-3.63281	-3.63281	-3.63281
Bra000170	-2.70051	#N/A	#N/A	#N/A	#N/A	#N/A	#N/A	#N/A	#N/A	#N/A	#N/A	#N/A	-2.70051	-2.70051	-2.70051	#N/A	#N/A	#N/A
Bra018383	-3.16391	#N/A	-3.16391	#N/A	#N/A	-3.16391	#N/A	#N/A	#N/A	#N/A	#N/A	#N/A	#N/A	#N/A	#N/A	-3.16391	-3.16391	-3.16391
Bra000557	-4.23182	#N/A	-4.23182	#N/A	#N/A	-4.23182	#N/A	#N/A	#N/A	#N/A	#N/A	#N/A	#N/A	#N/A	-4.23182	-4.23182	#N/A	#N/A
Bra038538	-3.48934	#N/A	-3.48934	#N/A	#N/A	-3.48934	#N/A	#N/A	#N/A	#N/A	#N/A	#N/A	#N/A	-3.48934	-3.48934	-3.48934	#N/A	#N/A
Bra031210	3.15573	#N/A	#N/A	#N/A	3.15573	#N/A	#N/A	#N/A	3.15573	#N/A	#N/A	#N/A	3.15573	3.15573	#N/A	#N/A	3.15573	3.15573
Bra031180	-2.34881	#N/A	-2.34881	#N/A	#N/A	-2.34881	#N/A	#N/A	#N/A	#N/A	#N/A	#N/A	#N/A	#N/A	-2.34881	#N/A	#N/A	#N/A
Bra033022	-3.45059	-3.45059	-3.45059	#N/A	-3.45059	#N/A	#N/A	-3.45059	#N/A	#N/A	#N/A	#N/A	-3.45059	#N/A	#N/A	#N/A	#N/A	#N/A
Bra035150	-2.70465	#N/A	#N/A	#N/A	#N/A	#N/A	#N/A	#N/A	-2.70465	#N/A	#N/A	#N/A	-2.70465	-2.70465	#N/A	#N/A	#N/A	#N/A
Bra015733	-2.18346	#N/A	#N/A	#N/A	#N/A	-2.18346	#N/A	#N/A	#N/A	#N/A	#N/A	#N/A	#N/A	#N/A	-2.18346	#N/A	#N/A	#N/A
Bra015922	-4.3701	#N/A	-4.3701	#N/A	#N/A	-4.3701	#N/A	#N/A	#N/A	#N/A	#N/A	#N/A	#N/A	#N/A	-4.3701	-4.3701	#N/A	#N/A
Bra027083	-2.2298	-2.2298	-2.2298	#N/A	#N/A	#N/A	#N/A	#N/A	#N/A	#N/A	#N/A	#N/A	-2.2298	#N/A	#N/A	#N/A	#N/A	#N/A
Bra012949	-5.25722	#N/A	-5.25722	#N/A	#N/A	-5.25722	#N/A	#N/A	#N/A	#N/A	#N/A	#N/A	#N/A	#N/A	-5.25722	-5.25722	-5.25722	-5.25722
Bra018216	-2.47306	#N/A	#N/A	#N/A	#N/A	-2.47306	#N/A	#N/A	#N/A	#N/A	#N/A	#N/A	#N/A	#N/A	#N/A	-2.47306	-2.47306	-2.47306
Bra018964	-2.1468	#N/A	#N/A	#N/A	-2.1468	-2.1468	#N/A	#N/A	#N/A	#N/A	#N/A	#N/A	#N/A	#N/A	#N/A	#N/A	#N/A	#N/A
Bra018850	-2.08524	#N/A	#N/A	#N/A	#N/A	#N/A	#N/A	#N/A	#N/A	#N/A	#N/A	#N/A	-2.08524	#N/A	#N/A	#N/A	-2.08524	-2.08524
Bra010922	-2.68262	#N/A	-2.68262	#N/A	-2.68262	#N/A	#N/A	-2.68262	#N/A	#N/A	#N/A	#N/A	-2.68262	#N/A	-2.68262	-2.68262	-2.68262	-2.68262
Bra036022	-2.70172	#N/A	#N/A	#N/A	#N/A	-2.70172	-2.70172	#N/A	#N/A	#N/A	-2.70172	-2.70172	-2.70172	#N/A	-2.70172	#N/A	#N/A	#N/A
Bra012251	-2.75204	#N/A	#N/A	#N/A	#N/A	#N/A	#N/A	#N/A	#N/A	#N/A	#N/A	#N/A	-2.75204	-2.75204	-2.75204	#N/A	#N/A	#N/A
Bra025832	2.10451	#N/A	2.10451	#N/A	#N/A	#N/A	#N/A	#N/A	#N/A	#N/A	#N/A	#N/A	2.10451	#N/A	2.10451	2.10451	#N/A	#N/A
Bra031048	-3.61057	#N/A	#N/A	#N/A	#N/A	#N/A	#N/A	#N/A	#N/A	#N/A	#N/A	#N/A	-3.61057	#N/A	#N/A	#N/A	#N/A	#N/A
Bra026711	-2.52116	#N/A	#N/A	#N/A	#N/A	#N/A	#N/A	#N/A	#N/A	#N/A	#N/A	#N/A	-2.52116	#N/A	#N/A	#N/A	#N/A	#N/A
Bra026084	-3.0157	#N/A	#N/A	#N/A	#N/A	-3.0157	#N/A	#N/A	#N/A	#N/A	#N/A	#N/A	#N/A	#N/A	-3.0157	#N/A	#N/A	#N/A
Bra026124	2.83779	#N/A	#N/A	#N/A	2.83779	2.83779	2.83779	2.83779	#N/A	#N/A	2.83779	2.83779	2.83779	2.83779	2.83779	2.83779	#N/A	#N/A
Bra026937	2.07484	#N/A	#N/A	#N/A	#N/A	2.07484	#N/A	#N/A	#N/A	#N/A	#N/A	#N/A	#N/A	#N/A	#N/A	#N/A	#N/A	#N/A
Bra016763	-6.06985	#N/A	#N/A	#N/A	-6.06985	-6.06985	#N/A	#N/A	#N/A	-6.06985	#N/A	#N/A	-6.06985	#N/A	#N/A	#N/A	#N/A	#N/A
Bra031663	2.52931	#N/A	#N/A	#N/A	#N/A	#N/A	#N/A	#N/A	#N/A	#N/A	#N/A	#N/A	2.52931	#N/A	#N/A	2.52931	#N/A	#N/A
Bra031657	-3.5257	#N/A	#N/A	#N/A	#N/A	-3.5257	#N/A	#N/A	#N/A	#N/A	#N/A	#N/A	#N/A	#N/A	-3.5257	#N/A	#N/A	#N/A
Bra032474	-2.61237	#N/A	#N/A	#N/A	-2.61237	#N/A	#N/A	#N/A	#N/A	#N/A	#N/A	#N/A	-2.61237	#N/A	#N/A	-2.61237	-2.61237	-2.61237
Bra032613	-2.66138	#N/A	#N/A	#N/A	#N/A	#N/A	#N/A	#N/A	#N/A	#N/A	#N/A	#N/A	-2.66138	#N/A	#N/A	#N/A	#N/A	#N/A
Bra032622	-3.14596	#N/A	#N/A	#N/A	#N/A	#N/A	#N/A	#N/A	#N/A	#N/A	#N/A	#N/A	-3.14596	#N/A	-3.14596	#N/A	-3.14596	-3.14596
Bra030496	-4.80101	#N/A	-4.80101	-4.80101	#N/A	#N/A	-4.80101	-4.80101	-4.80101	#N/A	-4.80101	-4.80101	-4.80101	#N/A	#N/A	#N/A	-4.80101	-4.80101
Bra002999	#N/A	-3.19806	-3.19806	#N/A	#N/A	#N/A	#N/A	-3.19806	#N/A	#N/A	#N/A	#N/A	#N/A	#N/A	#N/A	#N/A	#N/A	#N/A
Bra000708	#N/A	-2.05672	-2.05672	#N/A	#N/A	#N/A	#N/A	#N/A	#N/A	#N/A	#N/A	#N/A	#N/A	#N/A	#N/A	#N/A	#N/A	#N/A
Bra005424	#N/A	-2.78445	-2.78445	#N/A	#N/A	#N/A	#N/A	#N/A	#N/A	#N/A	#N/A	#N/A	#N/A	#N/A	#N/A	#N/A	#N/A	#N/A
Bra008216	#N/A	-2.445	#N/A	#N/A	#N/A	#N/A	#N/A	#N/A	#N/A	#N/A	#N/A	#N/A	#N/A	#N/A	#N/A	#N/A	#N/A	#N/A
Bra030182	#N/A	-2.60892	-2.60892	#N/A	#N/A	#N/A	#N/A	#N/A	#N/A	#N/A	#N/A	#N/A	#N/A	#N/A	#N/A	#N/A	#N/A	#N/A
Bra010807	#N/A	-2.106	-2.106	#N/A	#N/A	#N/A	#N/A	#N/A	#N/A	#N/A	#N/A	#N/A	#N/A	#N/A	#N/A	#N/A	#N/A	#N/A
Bra026099	#N/A	-2.02632	-2.02632	#N/A	#N/A	#N/A	#N/A	#N/A	#N/A	#N/A	#N/A	#N/A	#N/A	#N/A	#N/A	#N/A	#N/A	#N/A
Bra024339	#N/A	#N/A	-2.04062	#N/A	#N/A	#N/A	#N/A	#N/A	-2.04062	#N/A	#N/A	#N/A	#N/A	#N/A	-2.04062	-2.04062	#N/A	#N/A
Bra012972	#N/A	#N/A	-2.70884	#N/A	#N/A	#N/A	#N/A	#N/A	#N/A	#N/A	#N/A	#N/A	#N/A	#N/A	#N/A	#N/A	#N/A	#N/A
Bra019118	#N/A	#N/A	3.32227	3.32227	#N/A	#N/A	#N/A	#N/A	3.32227	#N/A	#N/A	#N/A	#N/A	#N/A	#N/A	#N/A	#N/A	#N/A
Bra021965	#N/A	#N/A	-5.24685	#N/A	-5.24685	#N/A	#N/A	#N/A	#N/A	#N/A	#N/A	#N/A	#N/A	#N/A	-5.24685	#N/A	#N/A	#N/A
Bra009735	#N/A	#N/A	-2.85758	#N/A	#N/A	#N/A	#N/A	#N/A	#N/A	#N/A	#N/A	#N/A	#N/A	#N/A	-2.85758	#N/A	-2.85758	-2.85758
Bra026485	#N/A	#N/A	-2.84234	#N/A	#N/A	#N/A	#N/A	#N/A	#N/A	#N/A	#N/A	#N/A	#N/A	#N/A	#N/A	#N/A	#N/A	#N/A
Bra023317	#N/A	#N/A	-2.02839	-2.02839	#N/A	#N/A	#N/A	-2.02839	-2.02839	#N/A	#N/A	#N/A	#N/A	#N/A	#N/A	#N/A	#N/A	#N/A
Bra006085	#N/A	#N/A	3.3144	#N/A	#N/A	#N/A	#N/A	#N/A	#N/A	#N/A	#N/A	#N/A	#N/A	#N/A	#N/A	#N/A	#N/A	#N/A
Bra037747	#N/A	#N/A	-2.64858	#N/A	#N/A	#N/A	#N/A	#N/A	#N/A	#N/A	#N/A	#N/A	#N/A	#N/A	#N/A	#N/A	#N/A	#N/A
Bra005709	#N/A	#N/A	-2.06584	#N/A	#N/A	#N/A	#N/A	#N/A	-2.06584	#N/A	#N/A	#N/A	#N/A	#N/A	#N/A	#N/A	#N/A	#N/A
Bra010713	#N/A	#N/A	4.30981	#N/A	#N/A	#N/A	#N/A	#N/A	#N/A	#N/A	#N/A	#N/A	#N/A	#N/A	#N/A	#N/A	#N/A	#N/A
Bra033588	#N/A	#N/A	-2.16198	#N/A	#N/A	#N/A	#N/A	#N/A	-2.16198	#N/A	#N/A	#N/A	#N/A	#N/A	#N/A	#N/A	#N/A	#N/A
Bra039194	#N/A	#N/A	3.14088	#N/A	#N/A	#N/A	#N/A	#N/A	#N/A	#N/A	#N/A	#N/A	#N/A	#N/A	#N/A	#N/A	#N/A	#N/A
Bra011332	#N/A	#N/A	2.04377	#N/A	#N/A	#N/A	#N/A	#N/A	#N/A	#N/A	#N/A	#N/A	#N/A	#N/A	#N/A	#N/A	#N/A	#N/A
Bra034941	#N/A	#N/A	2.08507	#N/A	#N/A	#N/A	#N/A	#N/A	#N/A	2.08507	#N/A	#N/A	#N/A	2.08507	2.08507	#N/A	#N/A	#N/A
Bra019058	#N/A	#N/A	-3.17663	#N/A	#N/A	#N/A	#N/A	#N/A	#N/A	#N/A	#N/A	#N/A	#N/A	#N/A	#N/A	#N/A	#N/A	#N/A
Bra026461	#N/A	#N/A	2.5276	2.5276	#N/A	#N/A	#N/A	#N/A	2.5276	#N/A	#N/A	#N/A	#N/A	#N/A	#N/A	#N/A	#N/A	#N/A
Bra040158	#N/A	#N/A	-3.27001	#N/A	#N/A	#N/A	-3.27001	#N/A	#N/A	#N/A	#N/A	#N/A	#N/A	-3.27001	#N/A	-3.27001	#N/A	#N/A
Bra012784	#N/A	#N/A	-5.60002	#N/A	#N/A	#N/A	#N/A	#N/A	#N/A	#N/A	#N/A	#N/A	#N/A	#N/A	#N/A	#N/A	#N/A	#N/A
Bra014674	#N/A	#N/A	-2.22396	#N/A	#N/A	#N/A	#N/A	#N/A	#N/A	#N/A	#N/A	#N/A	#N/A	-2.22396	#N/A	#N/A	#N/A	#N/A
Bra019466	#N/A	#N/A	-2.25728	#N/A	#N/A	#N/A	#N/A	#N/A	#N/A	#N/A	#N/A	#N/A	#N/A	#N/A	#N/A	#N/A	#N/A	#N/A
Bra023857	#N/A	#N/A	-3.40103	#N/A	#N/A	#N/A	#N/A	#N/A	-3.40103	#N/A	#N/A	#N/A	#N/A	#N/A	#N/A	#N/A	#N/A	#N/A
Bra031255	#N/A	#N/A	-4.12096	#N/A	#N/A	#N/A	#N/A	#N/A	#N/A	#N/A	#N/A	#N/A	#N/A	#N/A	#N/A	#N/A	#N/A	#N/A
Bra001761	#N/A	#N/A	3.24396	#N/A	#N/A	#N/A	#N/A	#N/A	#N/A	3.24396	#N/A	#N/A	#N/A	#N/A	#N/A	#N/A	#N/A	#N/A
Bra021259	#N/A	#N/A	-2.95115	#N/A	#N/A	#N/A	#N/A	#N/A	#N/A	#N/A	#N/A	#N/A	#N/A	#N/A	-2.95115	#N/A	#N/A	#N/A
Bra022225	#N/A	#N/A	-3.66639	#N/A	#N/A	#N/A	#N/A	#N/A	#N/A	#N/A	#N/A	#N/A	#N/A	#N/A	#N/A	#N/A	#N/A	#N/A
Bra022191	#N/A	#N/A	-2.72452	#N/A	#N/A	#N/A	#N/A	#N/A	#N/A	#N/A	#N/A	#N/A	#N/A	#N/A	#N/A	#N/A	#N/A	#N/A
Bra029778	#N/A	#N/A	-3.45677	-3.45677	#N/A	#N/A	-3.45677	-3.45677	-3.45677	#N/A	-3.45677	-3.45677	#N/A	#N/A	#N/A	#N/A	-3.45677	-3.45677
Bra001264	#N/A	#N/A	5.74276	#N/A	#N/A	#N/A	#N/A	#N/A	5.74276	#N/A	#N/A	#N/A	#N/A	#N/A	#N/A	#N/A	#N/A	#N/A
Bra004507	#N/A	#N/A	-3.88147	#N/A	#N/A	#N/A	#N/A	#N/A	-3.88147	#N/A	#N/A	#N/A	#N/A	#N/A	#N/A	#N/A	#N/A	#N/A
Bra039338	#N/A	#N/A	-2.11198	#N/A	#N/A	#N/A	#N/A	#N/A	#N/A	#N/A	#N/A	#N/A	#N/A	#N/A	#N/A	#N/A	#N/A	#N/A
Bra004718	#N/A	#N/A	3.44241	#N/A	#N/A	#N/A	#N/A	#N/A	#N/A	#N/A	#N/A	#N/A	#N/A	#N/A	#N/A	#N/A	#N/A	#N/A
Bra016886	#N/A	#N/A	2.68306	#N/A	#N/A	#N/A	#N/A	#N/A	#N/A	#N/A	#N/A	#N/A	#N/A	#N/A	#N/A	#N/A	#N/A	#N/A
Bra017035	#N/A	#N/A	6.91239	#N/A	#N/A	#N/A	#N/A	#N/A	6.91239	#N/A	#N/A	#N/A	#N/A	#N/A	#N/A	#N/A	#N/A	#N/A
Bra017218	#N/A	#N/A	2.0415	2.0415	#N/A	#N/A	#N/A	2.0415	#N/A	#N/A	2.0415	2.0415	#N/A	#N/A	#N/A	#N/A	#N/A	#N/A
Bra018249	#N/A	#N/A	-3.05805	#N/A	#N/A	#N/A	#N/A	#N/A	#N/A	#N/A	#N/A	#N/A	#N/A	#N/A	#N/A	#N/A	#N/A	#N/A
Bra022805	#N/A	#N/A	-3.00126	#N/A	#N/A	#N/A	#N/A	#N/A	#N/A	#N/A	#N/A	#N/A	#N/A	#N/A	#N/A	#N/A	#N/A	#N/A
Bra031619	#N/A	#N/A	2.50452	#N/A	#N/A	#N/A	#N/A	#N/A	#N/A	#N/A	#N/A	#N/A	#N/A	#N/A	#N/A	#N/A	#N/A	#N/A
Bra007843	#N/A	#N/A	-2.05169	#N/A	#N/A	#N/A	#N/A	#N/A	#N/A	#N/A	#N/A	#N/A	#N/A	#N/A	#N/A	#N/A	#N/A	#N/A
Bra039937	#N/A	#N/A	-2.29305	#N/A	#N/A	#N/A	#N/A	#N/A	#N/A	#N/A	#N/A	#N/A	#N/A	#N/A	#N/A	#N/A	#N/A	#N/A
Bra038832	#N/A	#N/A	3.73241	#N/A	#N/A	#N/A	#N/A	#N/A	3.73241	#N/A	#N/A	#N/A	#N/A	#N/A	#N/A	#N/A	#N/A	#N/A
Bra026572	#N/A	#N/A	2.51493	#N/A	#N/A	#N/A	#N/A	#N/A	#N/A	#N/A	#N/A	#N/A	#N/A	#N/A	#N/A	#N/A	#N/A	#N/A
Bra024900	#N/A	#N/A	-4.05021	#N/A	#N/A	#N/A	#N/A	#N/A	#N/A	#N/A	#N/A	#N/A	#N/A	-4.05021	-4.05021	#N/A	#N/A	#N/A
Bra016635	#N/A	#N/A	3.25939	#N/A	#N/A	#N/A	#N/A	#N/A	#N/A	#N/A	#N/A	#N/A	#N/A	#N/A	#N/A	#N/A	#N/A	#N/A
Bra003670	#N/A	#N/A	-3.6863	#N/A	#N/A	#N/A	#N/A	#N/A	#N/A	#N/A	#N/A	#N/A	#N/A	#N/A	#N/A	#N/A	#N/A	#N/A
Bra015866	#N/A	#N/A	-2.03766	#N/A	#N/A	#N/A	#N/A	#N/A	#N/A	#N/A	#N/A	#N/A	#N/A	#N/A	#N/A	#N/A	#N/A	#N/A
Bra016230	#N/A	#N/A	-3.32419	#N/A	#N/A	#N/A	#N/A	#N/A	#N/A	#N/A	#N/A	-3.32419	#N/A	#N/A	#N/A	#N/A	-3.32419	-3.32419
Bra007864	#N/A	#N/A	2.92623	2.92623	#N/A	#N/A	#N/A	#N/A	#N/A	#N/A	#N/A	#N/A	#N/A	#N/A	#N/A	#N/A	#N/A	#N/A
Bra019711	#N/A	#N/A	-2.89085	#N/A	#N/A	#N/A	#N/A	#N/A	#N/A	#N/A	-2.89085	#N/A	#N/A	-2.89085	#N/A	#N/A	#N/A	#N/A
Bra018907	#N/A	#N/A	-2.35787	#N/A	#N/A	#N/A	#N/A	#N/A	#N/A	#N/A	#N/A	#N/A	#N/A	#N/A	#N/A	-2.35787	#N/A	#N/A
Bra034424	#N/A	#N/A	-2.79607	#N/A	#N/A	#N/A	#N/A	#N/A	#N/A	#N/A	#N/A	#N/A	#N/A	#N/A	#N/A	#N/A	#N/A	#N/A
Bra012299	#N/A	#N/A	2.43986	#N/A	#N/A	#N/A	#N/A	#N/A	#N/A	#N/A	#N/A	#N/A	#N/A	#N/A	#N/A	#N/A	#N/A	#N/A
Bra026991	#N/A	#N/A	3.13716	#N/A	3.13716	#N/A	#N/A	#N/A	#N/A	#N/A	#N/A	#N/A	#N/A	#N/A	#N/A	#N/A	#N/A	#N/A
Bra033324	#N/A	#N/A	-4.35391	#N/A	#N/A	#N/A	#N/A	#N/A	#N/A	#N/A	#N/A	#N/A	#N/A	#N/A	#N/A	#N/A	#N/A	#N/A
Bra029990	#N/A	#N/A	#N/A	-4.248	-4.248	#N/A	-4.248	-4.248	#N/A	#N/A	-4.248	-4.248	#N/A	-4.248	#N/A	#N/A	-4.248	-4.248
Bra029311	#N/A	#N/A	#N/A	3.0232	#N/A	#N/A	#N/A	#N/A	#N/A	3.0232	3.0232	3.0232	#N/A	3.0232	3.0232	#N/A	#N/A	#N/A
Bra006694	#N/A	#N/A	#N/A	2.83967	#N/A	#N/A	2.83967	#N/A	#N/A	#N/A	2.83967	2.83967	#N/A	#N/A	#N/A	#N/A	#N/A	#N/A
Bra036183	#N/A	#N/A	#N/A	-2.23092	#N/A	#N/A	#N/A	#N/A	#N/A	#N/A	#N/A	#N/A	#N/A	#N/A	#N/A	#N/A	#N/A	#N/A
Bra023515	#N/A	#N/A	#N/A	2.13565	#N/A	#N/A	2.13565	#N/A	#N/A	#N/A	2.13565	2.13565	#N/A	#N/A	#N/A	#N/A	2.13565	2.13565
Bra028724	#N/A	#N/A	#N/A	2.61838	#N/A	#N/A	#N/A	#N/A	#N/A	#N/A	#N/A	#N/A	#N/A	#N/A	#N/A	#N/A	#N/A	#N/A
Bra005751	#N/A	#N/A	#N/A	-3.2615	#N/A	#N/A	-3.2615	-3.2615	-3.2615	#N/A	-3.2615	-3.2615	#N/A	#N/A	#N/A	#N/A	-3.2615	-3.2615
Bra017759	#N/A	#N/A	#N/A	2.83117	#N/A	#N/A	#N/A	#N/A	#N/A	#N/A	#N/A	#N/A	#N/A	#N/A	#N/A	#N/A	#N/A	#N/A
Bra012532	#N/A	#N/A	#N/A	4.68708	#N/A	#N/A	#N/A	#N/A	#N/A	#N/A	#N/A	#N/A	#N/A	4.68708	#N/A	#N/A	#N/A	#N/A
Bra007378	#N/A	#N/A	#N/A	2.58764	#N/A	#N/A	#N/A	#N/A	#N/A	#N/A	#N/A	#N/A	#N/A	#N/A	#N/A	#N/A	#N/A	#N/A
Bra004946	#N/A	#N/A	#N/A	2.35462	#N/A	#N/A	#N/A	#N/A	#N/A	#N/A	#N/A	#N/A	#N/A	#N/A	#N/A	#N/A	#N/A	#N/A
Bra016900	#N/A	#N/A	#N/A	2.85219	#N/A	#N/A	#N/A	2.85219	#N/A	#N/A	#N/A	#N/A	#N/A	#N/A	#N/A	#N/A	#N/A	#N/A
Bra021903	#N/A	#N/A	#N/A	2.63438	#N/A	#N/A	#N/A	#N/A	#N/A	#N/A	#N/A	#N/A	#N/A	#N/A	#N/A	#N/A	#N/A	#N/A
Bra016164	#N/A	#N/A	#N/A	-2.83053	#N/A	#N/A	-2.83053	-2.83053	#N/A	#N/A	-2.83053	-2.83053	#N/A	#N/A	#N/A	#N/A	-2.83053	-2.83053
Bra003969	#N/A	#N/A	#N/A	-3.79585	#N/A	#N/A	-3.79585	-3.79585	#N/A	#N/A	-3.79585	-3.79585	#N/A	#N/A	#N/A	#N/A	-3.79585	-3.79585
Bra036653	#N/A	#N/A	#N/A	-3.02422	-3.02422	#N/A	#N/A	-3.02422	#N/A	#N/A	#N/A	#N/A	#N/A	#N/A	#N/A	#N/A	-3.02422	-3.02422
Bra006709	#N/A	#N/A	#N/A	#N/A	-2.82466	#N/A	#N/A	-2.82466	#N/A	#N/A	#N/A	#N/A	#N/A	#N/A	#N/A	#N/A	#N/A	#N/A
Bra002594	#N/A	#N/A	#N/A	#N/A	-2.02549	#N/A	#N/A	-2.02549	#N/A	#N/A	#N/A	#N/A	#N/A	#N/A	#N/A	#N/A	#N/A	#N/A
Bra029145	#N/A	#N/A	#N/A	#N/A	-3.34134	#N/A	#N/A	-3.34134	#N/A	#N/A	#N/A	#N/A	#N/A	#N/A	#N/A	#N/A	#N/A	#N/A
Bra013009	#N/A	#N/A	#N/A	#N/A	2.68023	#N/A	#N/A	#N/A	#N/A	2.68023	#N/A	#N/A	#N/A	#N/A	#N/A	#N/A	#N/A	#N/A
Bra026353	#N/A	#N/A	#N/A	#N/A	-2.36717	#N/A	#N/A	-2.36717	#N/A	#N/A	#N/A	#N/A	#N/A	#N/A	#N/A	#N/A	#N/A	#N/A
Bra005351	#N/A	#N/A	#N/A	#N/A	-2.88273	#N/A	#N/A	-2.88273	#N/A	#N/A	#N/A	#N/A	#N/A	#N/A	#N/A	#N/A	-2.88273	-2.88273
Bra007637	#N/A	#N/A	#N/A	#N/A	-2.92031	#N/A	#N/A	-2.92031	#N/A	#N/A	#N/A	#N/A	#N/A	#N/A	#N/A	#N/A	#N/A	-2.92031
Bra007603	#N/A	#N/A	#N/A	#N/A	-3.2367	#N/A	#N/A	#N/A	#N/A	#N/A	#N/A	#N/A	#N/A	#N/A	#N/A	#N/A	#N/A	#N/A
Bra014666	#N/A	#N/A	#N/A	#N/A	-2.45982	#N/A	#N/A	#N/A	#N/A	#N/A	#N/A	#N/A	#N/A	#N/A	-2.45982	#N/A	-2.45982	-2.45982
Bra006997	#N/A	#N/A	#N/A	#N/A	-2.09094	#N/A	#N/A	-2.09094	#N/A	#N/A	#N/A	#N/A	#N/A	#N/A	#N/A	#N/A	#N/A	#N/A
Bra012803	#N/A	#N/A	#N/A	#N/A	-2.4581	#N/A	#N/A	#N/A	#N/A	#N/A	#N/A	#N/A	#N/A	-2.4581	#N/A	#N/A	#N/A	#N/A
Bra018183	#N/A	#N/A	#N/A	#N/A	-2.62535	#N/A	#N/A	-2.62535	#N/A	#N/A	#N/A	#N/A	#N/A	#N/A	#N/A	-2.62535	-2.62535	-2.62535
Bra015025	#N/A	#N/A	#N/A	#N/A	-2.36115	#N/A	#N/A	#N/A	#N/A	#N/A	#N/A	#N/A	#N/A	#N/A	#N/A	#N/A	#N/A	#N/A
Bra001752	#N/A	#N/A	#N/A	#N/A	-4.12117	#N/A	#N/A	-4.12117	#N/A	#N/A	#N/A	#N/A	#N/A	#N/A	#N/A	#N/A	-4.12117	-4.12117
Bra022179	#N/A	#N/A	#N/A	#N/A	-2.23448	#N/A	#N/A	#N/A	#N/A	#N/A	#N/A	#N/A	#N/A	#N/A	#N/A	#N/A	#N/A	#N/A
Bra021113	#N/A	#N/A	#N/A	#N/A	2.38795	#N/A	#N/A	#N/A	#N/A	#N/A	#N/A	2.38795	#N/A	#N/A	#N/A	#N/A	#N/A	#N/A
Bra021558	#N/A	#N/A	#N/A	#N/A	-3.23576	#N/A	#N/A	#N/A	#N/A	#N/A	#N/A	#N/A	#N/A	#N/A	#N/A	#N/A	-3.23576	-3.23576
Bra014426	#N/A	#N/A	#N/A	#N/A	-2.67258	#N/A	#N/A	#N/A	#N/A	#N/A	-2.67258	-2.67258	#N/A	-2.67258	-2.67258	#N/A	#N/A	#N/A
Bra000203	#N/A	#N/A	#N/A	#N/A	4.53342	#N/A	4.53342	#N/A	#N/A	#N/A	4.53342	4.53342	#N/A	4.53342	#N/A	4.53342	#N/A	4.53342
Bra023103	#N/A	#N/A	#N/A	#N/A	-2.48648	#N/A	#N/A	-2.48648	#N/A	#N/A	#N/A	#N/A	#N/A	#N/A	#N/A	#N/A	#N/A	#N/A
Bra017278	#N/A	#N/A	#N/A	#N/A	-2.75242	#N/A	#N/A	#N/A	#N/A	#N/A	#N/A	#N/A	#N/A	-2.75242	#N/A	#N/A	#N/A	#N/A
Bra036901	#N/A	#N/A	#N/A	#N/A	2.01241	#N/A	#N/A	2.01241	#N/A	#N/A	#N/A	#N/A	#N/A	#N/A	2.01241	#N/A	#N/A	#N/A
Bra023278	#N/A	#N/A	#N/A	#N/A	-3.0184	#N/A	#N/A	#N/A	#N/A	#N/A	#N/A	#N/A	#N/A	#N/A	#N/A	#N/A	#N/A	-3.0184
Bra024539	#N/A	#N/A	#N/A	#N/A	-4.34445	#N/A	-4.34445	#N/A	#N/A	#N/A	#N/A	#N/A	#N/A	#N/A	-4.34445	#N/A	#N/A	#N/A
Bra026062	#N/A	#N/A	#N/A	#N/A	2.19699	#N/A	#N/A	#N/A	#N/A	#N/A	#N/A	#N/A	#N/A	#N/A	2.19699	#N/A	2.19699	2.19699
Bra031903	#N/A	#N/A	#N/A	#N/A	#N/A	#N/A	2.72632	2.72632	#N/A	#N/A	#N/A	#N/A	#N/A	2.72632	#N/A	#N/A	#N/A	2.72632
Bra029302	#N/A	#N/A	#N/A	#N/A	#N/A	#N/A	2.25427	#N/A	#N/A	#N/A	#N/A	#N/A	#N/A	2.25427	#N/A	#N/A	#N/A	#N/A
Bra028291	#N/A	#N/A	#N/A	#N/A	#N/A	#N/A	-5.21386	#N/A	#N/A	-5.21386	#N/A	#N/A	#N/A	-5.21386	#N/A	#N/A	#N/A	#N/A
Bra006599	#N/A	#N/A	#N/A	#N/A	#N/A	#N/A	-4.10502	#N/A	#N/A	#N/A	#N/A	#N/A	#N/A	#N/A	#N/A	#N/A	#N/A	#N/A
Bra008952	#N/A	#N/A	#N/A	#N/A	#N/A	#N/A	-2.33969	#N/A	#N/A	#N/A	#N/A	#N/A	#N/A	#N/A	#N/A	#N/A	#N/A	#N/A
Bra009250	#N/A	#N/A	#N/A	#N/A	#N/A	#N/A	4.27494	#N/A	#N/A	#N/A	#N/A	#N/A	#N/A	#N/A	#N/A	#N/A	#N/A	#N/A
Bra011833	#N/A	#N/A	#N/A	#N/A	#N/A	#N/A	2.18359	#N/A	#N/A	#N/A	#N/A	#N/A	#N/A	#N/A	#N/A	#N/A	#N/A	#N/A
Bra011749	#N/A	#N/A	#N/A	#N/A	#N/A	#N/A	-2.59879	-2.59879	#N/A	-2.59879	-2.59879	-2.59879	#N/A	#N/A	#N/A	#N/A	-2.59879	-2.59879
Bra017656	#N/A	#N/A	#N/A	#N/A	#N/A	#N/A	-6.20964	#N/A	#N/A	#N/A	#N/A	#N/A	#N/A	-6.20964	#N/A	#N/A	#N/A	#N/A
Bra011383	#N/A	#N/A	#N/A	#N/A	#N/A	#N/A	-2.87256	#N/A	#N/A	#N/A	#N/A	#N/A	#N/A	#N/A	#N/A	#N/A	#N/A	#N/A
Bra012910	#N/A	#N/A	#N/A	#N/A	#N/A	#N/A	-3.99209	#N/A	#N/A	#N/A	-3.99209	#N/A	#N/A	#N/A	#N/A	#N/A	#N/A	#N/A
Bra013226	#N/A	#N/A	#N/A	#N/A	#N/A	#N/A	-2.14112	#N/A	#N/A	#N/A	#N/A	#N/A	#N/A	#N/A	-2.14112	-2.14112	#N/A	#N/A
Bra023756	#N/A	#N/A	#N/A	#N/A	#N/A	#N/A	2.39781	#N/A	#N/A	#N/A	#N/A	#N/A	#N/A	#N/A	2.39781	#N/A	#N/A	#N/A
Bra030957	#N/A	#N/A	#N/A	#N/A	#N/A	#N/A	-3.50557	-3.50557	#N/A	#N/A	#N/A	-3.50557	#N/A	-3.50557	-3.50557	#N/A	#N/A	#N/A
Bra001122	#N/A	#N/A	#N/A	#N/A	#N/A	#N/A	4.72944	#N/A	#N/A	#N/A	#N/A	#N/A	#N/A	4.72944	#N/A	#N/A	4.72944	4.72944
Bra037630	#N/A	#N/A	#N/A	#N/A	#N/A	#N/A	-4.61055	#N/A	#N/A	#N/A	#N/A	#N/A	#N/A	-4.61055	#N/A	#N/A	#N/A	#N/A
Bra004449	#N/A	#N/A	#N/A	#N/A	#N/A	#N/A	2.19697	#N/A	#N/A	#N/A	#N/A	#N/A	#N/A	#N/A	#N/A	#N/A	#N/A	#N/A
Bra021712	#N/A	#N/A	#N/A	#N/A	#N/A	#N/A	3.31568	#N/A	#N/A	#N/A	#N/A	#N/A	#N/A	3.31568	#N/A	#N/A	#N/A	#N/A
Bra013123	#N/A	#N/A	#N/A	#N/A	#N/A	#N/A	3.41072	#N/A	#N/A	#N/A	3.41072	3.41072	#N/A	3.41072	#N/A	#N/A	#N/A	#N/A
Bra015882	#N/A	#N/A	#N/A	#N/A	#N/A	#N/A	-3.30023	#N/A	#N/A	#N/A	#N/A	#N/A	#N/A	-3.30023	#N/A	#N/A	#N/A	#N/A
Bra008032	#N/A	#N/A	#N/A	#N/A	#N/A	#N/A	-2.4744	#N/A	#N/A	#N/A	#N/A	#N/A	#N/A	#N/A	-2.4744	#N/A	#N/A	#N/A
Bra003883	#N/A	#N/A	#N/A	#N/A	#N/A	#N/A	2.53113	#N/A	#N/A	#N/A	#N/A	#N/A	#N/A	#N/A	2.53113	#N/A	#N/A	#N/A
Bra016136	#N/A	#N/A	#N/A	#N/A	#N/A	#N/A	-5.72598	#N/A	#N/A	#N/A	#N/A	#N/A	#N/A	#N/A	#N/A	#N/A	#N/A	#N/A
Bra027736	#N/A	#N/A	#N/A	#N/A	#N/A	#N/A	-2.44745	#N/A	#N/A	#N/A	#N/A	#N/A	#N/A	#N/A	#N/A	#N/A	#N/A	#N/A
Bra010210	#N/A	#N/A	#N/A	#N/A	#N/A	#N/A	-4.02874	#N/A	#N/A	#N/A	#N/A	#N/A	#N/A	#N/A	#N/A	#N/A	#N/A	#N/A
Bra032901	#N/A	#N/A	#N/A	#N/A	#N/A	#N/A	-5.32533	#N/A	#N/A	#N/A	#N/A	#N/A	#N/A	#N/A	#N/A	#N/A	#N/A	#N/A
Bra010881	#N/A	#N/A	#N/A	#N/A	#N/A	#N/A	-3.22061	#N/A	#N/A	#N/A	#N/A	#N/A	#N/A	-3.22061	#N/A	#N/A	#N/A	#N/A
Bra031069	#N/A	#N/A	#N/A	#N/A	#N/A	#N/A	-6.05413	#N/A	#N/A	#N/A	#N/A	#N/A	#N/A	#N/A	#N/A	#N/A	#N/A	#N/A
Bra016518	#N/A	#N/A	#N/A	#N/A	#N/A	#N/A	-4.93862	#N/A	#N/A	#N/A	#N/A	#N/A	#N/A	#N/A	#N/A	#N/A	#N/A	#N/A
Bra025914	#N/A	#N/A	#N/A	#N/A	#N/A	#N/A	-2.14724	#N/A	-2.14724	#N/A	#N/A	#N/A	#N/A	#N/A	#N/A	#N/A	-2.14724	-2.14724
Bra031798	#N/A	#N/A	#N/A	#N/A	#N/A	#N/A	3.69542	#N/A	#N/A	#N/A	#N/A	#N/A	#N/A	3.69542	3.69542	3.69542	3.69542	3.69542
Bra029093	#N/A	#N/A	#N/A	#N/A	#N/A	#N/A	#N/A	2.3093	#N/A	#N/A	#N/A	#N/A	#N/A	#N/A	#N/A	#N/A	#N/A	#N/A
Bra028290	#N/A	#N/A	#N/A	#N/A	#N/A	#N/A	#N/A	-6.13537	#N/A	-6.13537	#N/A	#N/A	#N/A	#N/A	#N/A	#N/A	#N/A	#N/A
Bra025012	#N/A	#N/A	#N/A	#N/A	#N/A	#N/A	#N/A	4.33605	#N/A	#N/A	#N/A	#N/A	#N/A	#N/A	#N/A	#N/A	#N/A	#N/A
Bra009294	#N/A	#N/A	#N/A	#N/A	#N/A	#N/A	#N/A	-4.23529	#N/A	#N/A	#N/A	#N/A	#N/A	#N/A	#N/A	#N/A	#N/A	#N/A
Bra023576	#N/A	#N/A	#N/A	#N/A	#N/A	#N/A	#N/A	-2.01062	#N/A	#N/A	#N/A	#N/A	#N/A	#N/A	#N/A	#N/A	#N/A	#N/A
Bra023398	#N/A	#N/A	#N/A	#N/A	#N/A	#N/A	#N/A	-2.25029	#N/A	#N/A	#N/A	#N/A	#N/A	#N/A	#N/A	#N/A	#N/A	#N/A
Bra008850	#N/A	#N/A	#N/A	#N/A	#N/A	#N/A	#N/A	2.37544	#N/A	#N/A	2.37544	#N/A	#N/A	#N/A	2.37544	#N/A	#N/A	2.37544
Bra006862	#N/A	#N/A	#N/A	#N/A	#N/A	#N/A	#N/A	-2.44457	#N/A	#N/A	#N/A	#N/A	#N/A	-2.44457	#N/A	#N/A	#N/A	#N/A
Bra025280	#N/A	#N/A	#N/A	#N/A	#N/A	#N/A	#N/A	-2.44465	#N/A	#N/A	#N/A	#N/A	#N/A	#N/A	#N/A	#N/A	-2.44465	-2.44465
Bra013714	#N/A	#N/A	#N/A	#N/A	#N/A	#N/A	#N/A	2.77657	#N/A	#N/A	#N/A	2.77657	#N/A	#N/A	#N/A	#N/A	2.77657	2.77657
Bra013426	#N/A	#N/A	#N/A	#N/A	#N/A	#N/A	#N/A	3.36947	#N/A	#N/A	#N/A	3.36947	#N/A	#N/A	#N/A	#N/A	3.36947	3.36947
Bra029496	#N/A	#N/A	#N/A	#N/A	#N/A	#N/A	#N/A	3.3589	#N/A	#N/A	#N/A	#N/A	#N/A	#N/A	#N/A	#N/A	#N/A	#N/A
Bra007334	#N/A	#N/A	#N/A	#N/A	#N/A	#N/A	#N/A	-4.89487	#N/A	#N/A	#N/A	#N/A	#N/A	#N/A	#N/A	#N/A	-4.89487	-4.89487
Bra006975	#N/A	#N/A	#N/A	#N/A	#N/A	#N/A	#N/A	2.32218	#N/A	#N/A	#N/A	#N/A	#N/A	#N/A	#N/A	#N/A	#N/A	#N/A
Bra025400	#N/A	#N/A	#N/A	#N/A	#N/A	#N/A	#N/A	-2.50962	#N/A	#N/A	#N/A	#N/A	#N/A	#N/A	#N/A	#N/A	#N/A	#N/A
Bra036353	#N/A	#N/A	#N/A	#N/A	#N/A	#N/A	#N/A	-2.07191	#N/A	#N/A	#N/A	#N/A	#N/A	#N/A	#N/A	#N/A	#N/A	#N/A
Bra001789	#N/A	#N/A	#N/A	#N/A	#N/A	#N/A	#N/A	-2.31436	#N/A	#N/A	#N/A	#N/A	#N/A	#N/A	#N/A	#N/A	#N/A	#N/A
Bra006218	#N/A	#N/A	#N/A	#N/A	#N/A	#N/A	#N/A	-2.04536	#N/A	#N/A	#N/A	#N/A	#N/A	#N/A	#N/A	#N/A	#N/A	#N/A
Bra001422	#N/A	#N/A	#N/A	#N/A	#N/A	#N/A	#N/A	-3.09588	#N/A	#N/A	#N/A	#N/A	#N/A	-3.09588	#N/A	#N/A	#N/A	#N/A
Bra031431	#N/A	#N/A	#N/A	#N/A	#N/A	#N/A	#N/A	2.02228	#N/A	#N/A	#N/A	#N/A	#N/A	#N/A	#N/A	#N/A	#N/A	#N/A
Bra004748	#N/A	#N/A	#N/A	#N/A	#N/A	#N/A	#N/A	2.3761	#N/A	#N/A	#N/A	#N/A	#N/A	#N/A	#N/A	#N/A	#N/A	#N/A
Bra005071	#N/A	#N/A	#N/A	#N/A	#N/A	#N/A	#N/A	4.2581	#N/A	#N/A	#N/A	#N/A	#N/A	#N/A	#N/A	#N/A	#N/A	#N/A
Bra022772	#N/A	#N/A	#N/A	#N/A	#N/A	#N/A	#N/A	-3.64997	#N/A	#N/A	#N/A	#N/A	#N/A	-3.64997	#N/A	#N/A	#N/A	#N/A
Bra004004	#N/A	#N/A	#N/A	#N/A	#N/A	#N/A	#N/A	-2.20745	#N/A	#N/A	#N/A	#N/A	#N/A	#N/A	#N/A	#N/A	#N/A	#N/A
Bra004330	#N/A	#N/A	#N/A	#N/A	#N/A	#N/A	#N/A	-3.62253	#N/A	#N/A	#N/A	#N/A	#N/A	#N/A	-3.62253	#N/A	#N/A	#N/A
Bra027664	#N/A	#N/A	#N/A	#N/A	#N/A	#N/A	#N/A	-2.56554	#N/A	#N/A	#N/A	#N/A	#N/A	#N/A	#N/A	#N/A	#N/A	#N/A
Bra031435	#N/A	#N/A	#N/A	#N/A	#N/A	#N/A	#N/A	-2.91021	#N/A	#N/A	-2.91021	-2.91021	#N/A	#N/A	-2.91021	#N/A	-2.91021	-2.91021
Bra039700	#N/A	#N/A	#N/A	#N/A	#N/A	#N/A	#N/A	-2.20253	#N/A	#N/A	#N/A	#N/A	#N/A	#N/A	#N/A	#N/A	#N/A	#N/A
Bra033239	#N/A	#N/A	#N/A	#N/A	#N/A	#N/A	#N/A	-2.54767	#N/A	#N/A	#N/A	#N/A	#N/A	#N/A	-2.54767	#N/A	#N/A	#N/A
Bra012964	#N/A	#N/A	#N/A	#N/A	#N/A	#N/A	#N/A	#N/A	2.67773	#N/A	#N/A	#N/A	#N/A	#N/A	#N/A	#N/A	#N/A	#N/A
Bra033809	#N/A	#N/A	#N/A	#N/A	#N/A	#N/A	#N/A	#N/A	3.67006	#N/A	#N/A	#N/A	#N/A	#N/A	#N/A	#N/A	#N/A	#N/A
Bra023610	#N/A	#N/A	#N/A	#N/A	#N/A	#N/A	#N/A	#N/A	-3.02225	#N/A	#N/A	#N/A	#N/A	#N/A	#N/A	#N/A	#N/A	#N/A
Bra005984	#N/A	#N/A	#N/A	#N/A	#N/A	#N/A	#N/A	#N/A	-2.32912	#N/A	#N/A	#N/A	#N/A	#N/A	#N/A	#N/A	#N/A	#N/A
Bra009302	#N/A	#N/A	#N/A	#N/A	#N/A	#N/A	#N/A	#N/A	-2.9048	#N/A	#N/A	#N/A	#N/A	#N/A	#N/A	#N/A	#N/A	#N/A
Bra007099	#N/A	#N/A	#N/A	#N/A	#N/A	#N/A	#N/A	#N/A	-3.13731	#N/A	#N/A	#N/A	#N/A	#N/A	#N/A	#N/A	#N/A	#N/A
Bra003187	#N/A	#N/A	#N/A	#N/A	#N/A	#N/A	#N/A	#N/A	-2.71697	#N/A	#N/A	#N/A	#N/A	#N/A	#N/A	#N/A	#N/A	#N/A
Bra018204	#N/A	#N/A	#N/A	#N/A	#N/A	#N/A	#N/A	#N/A	4.96642	#N/A	#N/A	#N/A	#N/A	#N/A	#N/A	#N/A	#N/A	#N/A
Bra035742	#N/A	#N/A	#N/A	#N/A	#N/A	#N/A	#N/A	#N/A	7.07217	#N/A	#N/A	#N/A	#N/A	#N/A	#N/A	#N/A	#N/A	#N/A
Bra027323	#N/A	#N/A	#N/A	#N/A	#N/A	#N/A	#N/A	#N/A	4.26212	#N/A	#N/A	#N/A	#N/A	#N/A	#N/A	#N/A	#N/A	#N/A
Bra034762	#N/A	#N/A	#N/A	#N/A	#N/A	#N/A	#N/A	#N/A	-4.9707	#N/A	#N/A	#N/A	#N/A	#N/A	#N/A	#N/A	#N/A	#N/A
Bra021480	#N/A	#N/A	#N/A	#N/A	#N/A	#N/A	#N/A	#N/A	-2.2659	#N/A	#N/A	#N/A	#N/A	#N/A	#N/A	#N/A	#N/A	#N/A
Bra035954	#N/A	#N/A	#N/A	#N/A	#N/A	#N/A	#N/A	#N/A	#N/A	-2.93833	#N/A	-2.93833	#N/A	-2.93833	-2.93833	#N/A	#N/A	#N/A
Bra022302	#N/A	#N/A	#N/A	#N/A	#N/A	#N/A	#N/A	#N/A	#N/A	2.18791	#N/A	#N/A	#N/A	#N/A	#N/A	#N/A	#N/A	#N/A
Bra037456	#N/A	#N/A	#N/A	#N/A	#N/A	#N/A	#N/A	#N/A	#N/A	-2.42311	#N/A	#N/A	#N/A	#N/A	-2.42311	#N/A	#N/A	#N/A
Bra039495	#N/A	#N/A	#N/A	#N/A	#N/A	#N/A	#N/A	#N/A	#N/A	2.30022	#N/A	#N/A	#N/A	#N/A	#N/A	#N/A	#N/A	#N/A
Bra023450	#N/A	#N/A	#N/A	#N/A	#N/A	#N/A	#N/A	#N/A	#N/A	2.70823	#N/A	2.70823	#N/A	#N/A	#N/A	#N/A	2.70823	2.70823
Bra011757	#N/A	#N/A	#N/A	#N/A	#N/A	#N/A	#N/A	#N/A	#N/A	-2.04304	#N/A	#N/A	#N/A	#N/A	#N/A	#N/A	#N/A	#N/A
Bra032734	#N/A	#N/A	#N/A	#N/A	#N/A	#N/A	#N/A	#N/A	#N/A	2.73574	#N/A	#N/A	#N/A	#N/A	#N/A	#N/A	#N/A	#N/A
Bra000760	#N/A	#N/A	#N/A	#N/A	#N/A	#N/A	#N/A	#N/A	#N/A	3.22865	#N/A	3.22865	#N/A	#N/A	#N/A	#N/A	#N/A	#N/A
Bra004840	#N/A	#N/A	#N/A	#N/A	#N/A	#N/A	#N/A	#N/A	#N/A	6.71069	#N/A	#N/A	#N/A	#N/A	#N/A	#N/A	6.71069	6.71069
Bra039038	#N/A	#N/A	#N/A	#N/A	#N/A	#N/A	#N/A	#N/A	#N/A	-3.09155	#N/A	#N/A	#N/A	#N/A	#N/A	#N/A	#N/A	#N/A
Bra013227	#N/A	#N/A	#N/A	#N/A	#N/A	#N/A	#N/A	#N/A	#N/A	-2.43895	#N/A	#N/A	#N/A	-2.43895	#N/A	#N/A	#N/A	#N/A
Bra021175	#N/A	#N/A	#N/A	#N/A	#N/A	#N/A	#N/A	#N/A	#N/A	-2.34857	#N/A	#N/A	#N/A	#N/A	#N/A	#N/A	#N/A	#N/A
Bra001411	#N/A	#N/A	#N/A	#N/A	#N/A	#N/A	#N/A	#N/A	#N/A	2.30281	#N/A	#N/A	#N/A	#N/A	#N/A	#N/A	#N/A	#N/A
Bra021672	#N/A	#N/A	#N/A	#N/A	#N/A	#N/A	#N/A	#N/A	#N/A	2.23962	#N/A	#N/A	#N/A	#N/A	#N/A	#N/A	#N/A	#N/A
Bra015935	#N/A	#N/A	#N/A	#N/A	#N/A	#N/A	#N/A	#N/A	#N/A	2.20475	#N/A	2.20475	#N/A	2.20475	#N/A	#N/A	#N/A	#N/A
Bra015938	#N/A	#N/A	#N/A	#N/A	#N/A	#N/A	#N/A	#N/A	#N/A	2.58615	#N/A	#N/A	#N/A	#N/A	#N/A	#N/A	#N/A	#N/A
Bra012409	#N/A	#N/A	#N/A	#N/A	#N/A	#N/A	#N/A	#N/A	#N/A	-2.14639	#N/A	#N/A	#N/A	-2.14639	#N/A	#N/A	#N/A	#N/A
Bra016432	#N/A	#N/A	#N/A	#N/A	#N/A	#N/A	#N/A	#N/A	#N/A	3.10014	#N/A	#N/A	#N/A	#N/A	#N/A	#N/A	#N/A	#N/A
Bra012270	#N/A	#N/A	#N/A	#N/A	#N/A	#N/A	#N/A	#N/A	#N/A	2.33847	#N/A	#N/A	#N/A	#N/A	#N/A	#N/A	#N/A	#N/A
Bra025668	#N/A	#N/A	#N/A	#N/A	#N/A	#N/A	#N/A	#N/A	#N/A	2.43194	#N/A	#N/A	#N/A	#N/A	#N/A	#N/A	#N/A	#N/A
Bra026058	#N/A	#N/A	#N/A	#N/A	#N/A	#N/A	#N/A	#N/A	#N/A	3.0285	#N/A	#N/A	#N/A	#N/A	#N/A	#N/A	#N/A	#N/A
Bra030589	#N/A	#N/A	#N/A	#N/A	#N/A	#N/A	#N/A	#N/A	#N/A	-3.55856	#N/A	#N/A	#N/A	#N/A	-3.55856	#N/A	#N/A	#N/A
Bra038612	#N/A	#N/A	#N/A	#N/A	#N/A	#N/A	#N/A	#N/A	#N/A	#N/A	-2.13242	#N/A	#N/A	#N/A	#N/A	-2.13242	#N/A	#N/A
Bra020197	#N/A	#N/A	#N/A	#N/A	#N/A	#N/A	#N/A	#N/A	#N/A	#N/A	2.98463	#N/A	#N/A	2.98463	#N/A	#N/A	#N/A	#N/A
Bra006194	#N/A	#N/A	#N/A	#N/A	#N/A	#N/A	#N/A	#N/A	#N/A	#N/A	3.12442	#N/A	#N/A	3.12442	3.12442	#N/A	#N/A	#N/A
Bra005891	#N/A	#N/A	#N/A	#N/A	#N/A	#N/A	#N/A	#N/A	#N/A	#N/A	-3.20365	#N/A	#N/A	-3.20365	-3.20365	#N/A	#N/A	#N/A
Bra023211	#N/A	#N/A	#N/A	#N/A	#N/A	#N/A	#N/A	#N/A	#N/A	#N/A	2.74276	#N/A	#N/A	2.74276	#N/A	#N/A	#N/A	#N/A
Bra019324	#N/A	#N/A	#N/A	#N/A	#N/A	#N/A	#N/A	#N/A	#N/A	#N/A	2.89443	#N/A	#N/A	2.89443	#N/A	#N/A	#N/A	#N/A
Bra020821	#N/A	#N/A	#N/A	#N/A	#N/A	#N/A	#N/A	#N/A	#N/A	#N/A	2.82978	#N/A	#N/A	2.82978	#N/A	#N/A	#N/A	#N/A
Bra001549	#N/A	#N/A	#N/A	#N/A	#N/A	#N/A	#N/A	#N/A	#N/A	#N/A	2.92906	2.92906	#N/A	2.92906	#N/A	#N/A	#N/A	#N/A
Bra004994	#N/A	#N/A	#N/A	#N/A	#N/A	#N/A	#N/A	#N/A	#N/A	#N/A	-4.75263	#N/A	#N/A	-4.75263	-4.75263	-4.75263	#N/A	#N/A
Bra022905	#N/A	#N/A	#N/A	#N/A	#N/A	#N/A	#N/A	#N/A	#N/A	#N/A	-3.31252	-3.31252	#N/A	-3.31252	#N/A	#N/A	#N/A	#N/A
Bra013138	#N/A	#N/A	#N/A	#N/A	#N/A	#N/A	#N/A	#N/A	#N/A	#N/A	4.38917	#N/A	#N/A	4.38917	#N/A	#N/A	#N/A	#N/A
Bra017373	#N/A	#N/A	#N/A	#N/A	#N/A	#N/A	#N/A	#N/A	#N/A	#N/A	-3.79771	#N/A	#N/A	-3.79771	#N/A	#N/A	-3.79771	-3.79771
Bra003588	#N/A	#N/A	#N/A	#N/A	#N/A	#N/A	#N/A	#N/A	#N/A	#N/A	-4.51987	#N/A	#N/A	-4.51987	#N/A	#N/A	#N/A	#N/A
Bra003598	#N/A	#N/A	#N/A	#N/A	#N/A	#N/A	#N/A	#N/A	#N/A	#N/A	3.46075	#N/A	#N/A	3.46075	#N/A	#N/A	#N/A	#N/A
Bra015912	#N/A	#N/A	#N/A	#N/A	#N/A	#N/A	#N/A	#N/A	#N/A	#N/A	-2.41281	-2.41281	#N/A	#N/A	#N/A	#N/A	#N/A	#N/A
Bra016002	#N/A	#N/A	#N/A	#N/A	#N/A	#N/A	#N/A	#N/A	#N/A	#N/A	3.03309	#N/A	#N/A	3.03309	#N/A	3.03309	3.03309	3.03309
Bra032911	#N/A	#N/A	#N/A	#N/A	#N/A	#N/A	#N/A	#N/A	#N/A	#N/A	-3.79739	-3.79739	#N/A	#N/A	#N/A	#N/A	#N/A	#N/A
Bra025884	#N/A	#N/A	#N/A	#N/A	#N/A	#N/A	#N/A	#N/A	#N/A	#N/A	3.25447	#N/A	#N/A	3.25447	#N/A	#N/A	#N/A	#N/A
Bra026104	#N/A	#N/A	#N/A	#N/A	#N/A	#N/A	#N/A	#N/A	#N/A	#N/A	3.04248	#N/A	#N/A	#N/A	#N/A	#N/A	#N/A	#N/A
Bra019862	#N/A	#N/A	#N/A	#N/A	#N/A	#N/A	#N/A	#N/A	#N/A	#N/A	2.04603	#N/A	#N/A	2.04603	#N/A	#N/A	#N/A	#N/A
Bra015435	#N/A	#N/A	#N/A	#N/A	#N/A	#N/A	#N/A	#N/A	#N/A	#N/A	2.00665	#N/A	#N/A	#N/A	#N/A	#N/A	#N/A	#N/A
Bra024328	#N/A	#N/A	#N/A	#N/A	#N/A	#N/A	#N/A	#N/A	#N/A	#N/A	#N/A	2.03124	#N/A	2.03124	#N/A	#N/A	#N/A	#N/A
Bra035641	#N/A	#N/A	#N/A	#N/A	#N/A	#N/A	#N/A	#N/A	#N/A	#N/A	#N/A	-3.52701	#N/A	-3.52701	#N/A	#N/A	#N/A	#N/A
Bra009300	#N/A	#N/A	#N/A	#N/A	#N/A	#N/A	#N/A	#N/A	#N/A	#N/A	#N/A	3.33844	#N/A	#N/A	#N/A	#N/A	#N/A	#N/A
Bra028752	#N/A	#N/A	#N/A	#N/A	#N/A	#N/A	#N/A	#N/A	#N/A	#N/A	#N/A	2.72881	#N/A	#N/A	#N/A	#N/A	#N/A	#N/A
Bra011636	#N/A	#N/A	#N/A	#N/A	#N/A	#N/A	#N/A	#N/A	#N/A	#N/A	#N/A	-4.0791	#N/A	#N/A	#N/A	-4.0791	#N/A	#N/A
Bra023998	#N/A	#N/A	#N/A	#N/A	#N/A	#N/A	#N/A	#N/A	#N/A	#N/A	#N/A	-2.3913	#N/A	-2.3913	#N/A	#N/A	#N/A	#N/A
Bra021082	#N/A	#N/A	#N/A	#N/A	#N/A	#N/A	#N/A	#N/A	#N/A	#N/A	#N/A	2.98581	#N/A	#N/A	#N/A	#N/A	#N/A	#N/A
Bra035236	#N/A	#N/A	#N/A	#N/A	#N/A	#N/A	#N/A	#N/A	#N/A	#N/A	#N/A	-3.0542	#N/A	-3.0542	#N/A	-3.0542	#N/A	#N/A
Bra004058	#N/A	#N/A	#N/A	#N/A	#N/A	#N/A	#N/A	#N/A	#N/A	#N/A	#N/A	3.57838	#N/A	#N/A	#N/A	#N/A	#N/A	#N/A
Bra021114	#N/A	#N/A	#N/A	#N/A	#N/A	#N/A	#N/A	#N/A	#N/A	#N/A	#N/A	2.05864	#N/A	#N/A	#N/A	#N/A	#N/A	#N/A
Bra017132	#N/A	#N/A	#N/A	#N/A	#N/A	#N/A	#N/A	#N/A	#N/A	#N/A	#N/A	4.10151	#N/A	#N/A	#N/A	#N/A	#N/A	#N/A
Bra022981	#N/A	#N/A	#N/A	#N/A	#N/A	#N/A	#N/A	#N/A	#N/A	#N/A	#N/A	-5.09672	#N/A	-5.09672	#N/A	#N/A	#N/A	#N/A
Bra007828	#N/A	#N/A	#N/A	#N/A	#N/A	#N/A	#N/A	#N/A	#N/A	#N/A	#N/A	2.05411	#N/A	#N/A	#N/A	#N/A	#N/A	#N/A
Bra031065	#N/A	#N/A	#N/A	#N/A	#N/A	#N/A	#N/A	#N/A	#N/A	#N/A	#N/A	-3.48142	#N/A	-3.48142	#N/A	#N/A	#N/A	#N/A
Bra032362	#N/A	#N/A	#N/A	#N/A	#N/A	#N/A	#N/A	#N/A	#N/A	#N/A	#N/A	-2.86185	#N/A	-2.86185	#N/A	#N/A	#N/A	#N/A
Bra025713	#N/A	#N/A	#N/A	#N/A	#N/A	#N/A	#N/A	#N/A	#N/A	#N/A	#N/A	-2.21268	#N/A	-2.21268	#N/A	#N/A	#N/A	#N/A
Bra025951	#N/A	#N/A	#N/A	#N/A	#N/A	#N/A	#N/A	#N/A	#N/A	#N/A	#N/A	-3.90362	#N/A	-3.90362	#N/A	#N/A	#N/A	#N/A
Bra037139	#N/A	#N/A	#N/A	#N/A	#N/A	#N/A	#N/A	#N/A	#N/A	#N/A	#N/A	#N/A	#N/A	-2.1463	#N/A	#N/A	#N/A	#N/A
Bra012058	#N/A	#N/A	#N/A	#N/A	#N/A	#N/A	#N/A	-3.54359	#N/A	#N/A	#N/A	#N/A	#N/A	-3.54359	#N/A	#N/A	#N/A	#N/A
Bra009663	#N/A	#N/A	#N/A	#N/A	#N/A	#N/A	#N/A	-3.44863	#N/A	#N/A	#N/A	#N/A	#N/A	-3.44863	#N/A	#N/A	#N/A	#N/A
Bra010099	#N/A	#N/A	#N/A	#N/A	#N/A	#N/A	#N/A	#N/A	#N/A	#N/A	#N/A	#N/A	#N/A	-3.18876	#N/A	#N/A	#N/A	#N/A
Bra028980	#N/A	#N/A	#N/A	#N/A	#N/A	#N/A	#N/A	#N/A	#N/A	#N/A	#N/A	#N/A	#N/A	4.45988	#N/A	#N/A	#N/A	#N/A
Bra010032	#N/A	#N/A	#N/A	#N/A	#N/A	#N/A	#N/A	#N/A	#N/A	#N/A	#N/A	#N/A	#N/A	-2.21005	#N/A	#N/A	#N/A	#N/A
Bra006366	#N/A	#N/A	#N/A	#N/A	#N/A	#N/A	#N/A	#N/A	#N/A	#N/A	#N/A	#N/A	#N/A	2.30562	#N/A	#N/A	#N/A	#N/A
Bra024988	#N/A	#N/A	#N/A	#N/A	#N/A	#N/A	#N/A	#N/A	#N/A	#N/A	#N/A	#N/A	#N/A	-2.14786	#N/A	#N/A	#N/A	#N/A
Bra027588	#N/A	#N/A	#N/A	#N/A	#N/A	#N/A	#N/A	#N/A	#N/A	#N/A	#N/A	#N/A	#N/A	2.61184	#N/A	#N/A	#N/A	#N/A
Bra025547	#N/A	#N/A	#N/A	#N/A	#N/A	#N/A	#N/A	#N/A	#N/A	#N/A	#N/A	#N/A	#N/A	3.49732	#N/A	#N/A	#N/A	#N/A
Bra033077	#N/A	#N/A	#N/A	#N/A	#N/A	#N/A	#N/A	#N/A	#N/A	#N/A	#N/A	#N/A	#N/A	-2.19888	#N/A	#N/A	#N/A	#N/A
Bra028436	#N/A	#N/A	#N/A	#N/A	#N/A	#N/A	#N/A	#N/A	#N/A	#N/A	#N/A	#N/A	#N/A	-2.1687	#N/A	-2.1687	#N/A	#N/A
Bra009783	#N/A	#N/A	#N/A	#N/A	#N/A	#N/A	#N/A	#N/A	#N/A	#N/A	#N/A	#N/A	#N/A	-2.4971	-2.4971	#N/A	-2.4971	-2.4971
Bra009774	#N/A	#N/A	#N/A	#N/A	#N/A	#N/A	#N/A	#N/A	#N/A	#N/A	#N/A	#N/A	#N/A	-2.29421	-2.29421	#N/A	#N/A	#N/A
Bra002400	#N/A	#N/A	#N/A	#N/A	#N/A	#N/A	#N/A	#N/A	#N/A	#N/A	#N/A	#N/A	#N/A	-2.66027	#N/A	#N/A	#N/A	#N/A
Bra002355	#N/A	#N/A	#N/A	#N/A	#N/A	#N/A	#N/A	#N/A	#N/A	#N/A	#N/A	#N/A	#N/A	3.76795	#N/A	3.76795	3.76795	3.76795
Bra008719	#N/A	#N/A	#N/A	#N/A	#N/A	#N/A	#N/A	#N/A	#N/A	#N/A	#N/A	#N/A	#N/A	-3.02078	#N/A	#N/A	#N/A	#N/A
Bra009037	#N/A	#N/A	#N/A	#N/A	#N/A	#N/A	#N/A	#N/A	#N/A	#N/A	#N/A	#N/A	#N/A	-2.32822	#N/A	#N/A	#N/A	#N/A
Bra009223	#N/A	#N/A	#N/A	#N/A	#N/A	#N/A	#N/A	#N/A	#N/A	#N/A	#N/A	#N/A	#N/A	2.9609	#N/A	#N/A	#N/A	#N/A
Bra021239	#N/A	#N/A	#N/A	#N/A	#N/A	#N/A	#N/A	#N/A	#N/A	#N/A	#N/A	#N/A	#N/A	4.56611	#N/A	#N/A	#N/A	#N/A
Bra010706	#N/A	#N/A	#N/A	#N/A	#N/A	#N/A	#N/A	#N/A	#N/A	#N/A	#N/A	#N/A	#N/A	2.22674	#N/A	#N/A	2.22674	2.22674
Bra011722	#N/A	#N/A	#N/A	#N/A	#N/A	#N/A	#N/A	#N/A	#N/A	#N/A	#N/A	#N/A	#N/A	2.51616	#N/A	#N/A	#N/A	#N/A
Bra011208	#N/A	#N/A	#N/A	#N/A	#N/A	#N/A	#N/A	#N/A	#N/A	#N/A	#N/A	#N/A	#N/A	2.22825	#N/A	#N/A	#N/A	#N/A
Bra019295	#N/A	#N/A	#N/A	#N/A	#N/A	#N/A	#N/A	#N/A	#N/A	#N/A	#N/A	#N/A	#N/A	-2.16487	-2.16487	#N/A	#N/A	#N/A
Bra013683	#N/A	#N/A	#N/A	#N/A	#N/A	#N/A	#N/A	#N/A	#N/A	#N/A	#N/A	#N/A	#N/A	2.36433	#N/A	#N/A	#N/A	#N/A
Bra020820	#N/A	#N/A	#N/A	#N/A	#N/A	#N/A	#N/A	#N/A	#N/A	#N/A	#N/A	#N/A	#N/A	3.65714	#N/A	#N/A	#N/A	#N/A
Bra020827	#N/A	#N/A	#N/A	#N/A	#N/A	#N/A	#N/A	#N/A	#N/A	#N/A	#N/A	#N/A	#N/A	-2.64543	#N/A	-2.64543	#N/A	#N/A
Bra013678	#N/A	#N/A	#N/A	#N/A	#N/A	#N/A	#N/A	#N/A	#N/A	#N/A	#N/A	#N/A	#N/A	-2.24602	#N/A	#N/A	#N/A	#N/A
Bra013476	#N/A	#N/A	#N/A	#N/A	#N/A	#N/A	#N/A	#N/A	#N/A	#N/A	#N/A	#N/A	#N/A	-3.07571	#N/A	-3.07571	#N/A	#N/A
Bra021039	#N/A	#N/A	#N/A	#N/A	#N/A	#N/A	#N/A	#N/A	#N/A	#N/A	#N/A	#N/A	#N/A	2.5723	#N/A	#N/A	#N/A	#N/A
Bra033549	#N/A	#N/A	#N/A	#N/A	#N/A	#N/A	#N/A	#N/A	#N/A	#N/A	#N/A	#N/A	#N/A	3.14363	#N/A	#N/A	3.14363	3.14363
Bra033482	#N/A	#N/A	#N/A	#N/A	#N/A	#N/A	#N/A	#N/A	#N/A	#N/A	#N/A	#N/A	#N/A	-4.43099	#N/A	#N/A	#N/A	#N/A
Bra002653	#N/A	#N/A	#N/A	#N/A	#N/A	#N/A	#N/A	#N/A	#N/A	#N/A	#N/A	#N/A	#N/A	-2.21729	#N/A	#N/A	#N/A	#N/A
Bra036269	#N/A	#N/A	#N/A	#N/A	#N/A	#N/A	#N/A	#N/A	#N/A	#N/A	#N/A	#N/A	#N/A	-2.44627	#N/A	#N/A	#N/A	#N/A
Bra037368	#N/A	#N/A	#N/A	#N/A	#N/A	#N/A	#N/A	#N/A	#N/A	#N/A	#N/A	#N/A	#N/A	-2.34425	-2.34425	#N/A	#N/A	#N/A
Bra033984	#N/A	#N/A	#N/A	#N/A	#N/A	#N/A	#N/A	#N/A	#N/A	#N/A	#N/A	#N/A	#N/A	-6.45195	#N/A	#N/A	#N/A	#N/A
Bra007195	#N/A	#N/A	#N/A	#N/A	#N/A	#N/A	#N/A	#N/A	#N/A	#N/A	#N/A	#N/A	#N/A	-4.47024	#N/A	#N/A	#N/A	#N/A
Bra033436	#N/A	#N/A	#N/A	#N/A	#N/A	#N/A	#N/A	#N/A	#N/A	#N/A	#N/A	#N/A	#N/A	-3.37074	#N/A	#N/A	#N/A	#N/A
Bra012898	#N/A	#N/A	#N/A	#N/A	#N/A	#N/A	#N/A	#N/A	#N/A	#N/A	#N/A	#N/A	#N/A	2.43201	2.43201	#N/A	#N/A	#N/A
Bra018051	#N/A	#N/A	#N/A	#N/A	#N/A	#N/A	#N/A	#N/A	#N/A	#N/A	#N/A	#N/A	#N/A	-4.46085	#N/A	#N/A	#N/A	#N/A
Bra038289	#N/A	#N/A	#N/A	#N/A	#N/A	#N/A	#N/A	#N/A	#N/A	#N/A	#N/A	#N/A	#N/A	2.61822	#N/A	#N/A	#N/A	#N/A
Bra025169	#N/A	#N/A	#N/A	#N/A	#N/A	#N/A	#N/A	#N/A	#N/A	#N/A	#N/A	#N/A	#N/A	3.91453	#N/A	#N/A	#N/A	#N/A
Bra015120	#N/A	#N/A	#N/A	#N/A	#N/A	#N/A	#N/A	#N/A	#N/A	#N/A	#N/A	#N/A	#N/A	-2.2437	-2.2437	-2.2437	#N/A	#N/A
Bra001905	#N/A	#N/A	#N/A	#N/A	#N/A	#N/A	#N/A	#N/A	#N/A	#N/A	#N/A	#N/A	#N/A	-2.44389	-2.44389	#N/A	#N/A	#N/A
Bra038205	#N/A	#N/A	#N/A	#N/A	#N/A	#N/A	#N/A	#N/A	#N/A	#N/A	#N/A	#N/A	#N/A	-2.37717	#N/A	#N/A	#N/A	#N/A
Bra001639	#N/A	#N/A	#N/A	#N/A	#N/A	#N/A	#N/A	#N/A	#N/A	#N/A	#N/A	#N/A	#N/A	-2.25825	#N/A	#N/A	#N/A	#N/A
Bra001454	#N/A	#N/A	#N/A	#N/A	#N/A	#N/A	#N/A	#N/A	#N/A	#N/A	#N/A	#N/A	#N/A	4.03918	4.03918	#N/A	#N/A	#N/A
Bra038683	#N/A	#N/A	#N/A	#N/A	#N/A	#N/A	#N/A	#N/A	#N/A	#N/A	#N/A	#N/A	#N/A	2.06538	#N/A	#N/A	#N/A	#N/A
Bra001367	#N/A	#N/A	#N/A	#N/A	#N/A	#N/A	#N/A	#N/A	#N/A	#N/A	#N/A	#N/A	#N/A	2.32705	#N/A	#N/A	#N/A	#N/A
Bra040061	#N/A	#N/A	#N/A	#N/A	#N/A	#N/A	#N/A	#N/A	#N/A	#N/A	#N/A	#N/A	#N/A	-2.66255	#N/A	#N/A	#N/A	#N/A
Bra000441	#N/A	#N/A	#N/A	#N/A	#N/A	#N/A	#N/A	#N/A	#N/A	#N/A	#N/A	#N/A	#N/A	5.50375	5.50375	#N/A	#N/A	#N/A
Bra000889	#N/A	#N/A	#N/A	#N/A	#N/A	#N/A	#N/A	#N/A	#N/A	#N/A	#N/A	#N/A	#N/A	5.73183	#N/A	#N/A	#N/A	#N/A
Bra039316	#N/A	#N/A	#N/A	#N/A	#N/A	#N/A	#N/A	#N/A	#N/A	#N/A	#N/A	#N/A	#N/A	-3.00577	#N/A	#N/A	#N/A	#N/A
Bra000382	#N/A	#N/A	#N/A	#N/A	#N/A	#N/A	#N/A	#N/A	#N/A	#N/A	#N/A	#N/A	#N/A	4.37344	#N/A	#N/A	#N/A	#N/A
Bra004772	#N/A	#N/A	#N/A	#N/A	#N/A	#N/A	#N/A	#N/A	#N/A	#N/A	#N/A	#N/A	#N/A	4.03571	#N/A	#N/A	#N/A	#N/A
Bra000311	#N/A	#N/A	#N/A	#N/A	#N/A	#N/A	#N/A	#N/A	#N/A	#N/A	#N/A	#N/A	#N/A	3.74683	#N/A	#N/A	#N/A	#N/A
Bra004771	#N/A	#N/A	#N/A	#N/A	#N/A	#N/A	#N/A	#N/A	#N/A	#N/A	#N/A	#N/A	#N/A	3.88769	#N/A	#N/A	#N/A	#N/A
Bra000122	#N/A	#N/A	#N/A	#N/A	#N/A	#N/A	#N/A	#N/A	#N/A	#N/A	#N/A	#N/A	#N/A	2.82206	#N/A	#N/A	#N/A	#N/A
Bra017148	#N/A	#N/A	#N/A	#N/A	#N/A	#N/A	#N/A	#N/A	#N/A	#N/A	#N/A	#N/A	#N/A	-2.62944	#N/A	#N/A	#N/A	#N/A
Bra021861	#N/A	#N/A	#N/A	#N/A	#N/A	#N/A	#N/A	#N/A	#N/A	#N/A	#N/A	#N/A	#N/A	-3.63477	#N/A	#N/A	#N/A	#N/A
Bra022815	#N/A	#N/A	#N/A	#N/A	#N/A	#N/A	#N/A	#N/A	#N/A	#N/A	#N/A	#N/A	#N/A	2.61992	#N/A	#N/A	#N/A	#N/A
Bra039982	#N/A	#N/A	#N/A	#N/A	#N/A	#N/A	#N/A	#N/A	#N/A	#N/A	#N/A	#N/A	#N/A	2.15148	#N/A	#N/A	#N/A	#N/A
Bra000508	#N/A	#N/A	#N/A	#N/A	#N/A	#N/A	#N/A	#N/A	#N/A	#N/A	#N/A	#N/A	#N/A	-3.33758	#N/A	#N/A	#N/A	#N/A
Bra034321	#N/A	#N/A	#N/A	#N/A	#N/A	#N/A	#N/A	#N/A	#N/A	#N/A	#N/A	#N/A	#N/A	-2.74496	#N/A	#N/A	#N/A	#N/A
Bra039217	#N/A	#N/A	#N/A	#N/A	#N/A	#N/A	#N/A	#N/A	#N/A	#N/A	#N/A	#N/A	#N/A	-3.49345	#N/A	#N/A	#N/A	#N/A
Bra039006	#N/A	#N/A	#N/A	#N/A	#N/A	#N/A	#N/A	#N/A	#N/A	#N/A	#N/A	#N/A	#N/A	2.63974	2.63974	2.63974	#N/A	#N/A
Bra028091	#N/A	#N/A	#N/A	#N/A	#N/A	#N/A	#N/A	#N/A	#N/A	#N/A	#N/A	#N/A	#N/A	3.56291	#N/A	#N/A	#N/A	#N/A
Bra002076	#N/A	#N/A	#N/A	#N/A	#N/A	#N/A	#N/A	#N/A	#N/A	#N/A	#N/A	#N/A	#N/A	-3.56091	#N/A	#N/A	#N/A	#N/A
Bra033198	#N/A	#N/A	#N/A	#N/A	#N/A	#N/A	#N/A	#N/A	#N/A	#N/A	#N/A	#N/A	#N/A	-2.40517	#N/A	#N/A	#N/A	#N/A
Bra024809	#N/A	#N/A	#N/A	#N/A	#N/A	#N/A	#N/A	#N/A	#N/A	#N/A	#N/A	#N/A	#N/A	-2.9119	-2.9119	#N/A	#N/A	#N/A
Bra026653	#N/A	#N/A	#N/A	#N/A	#N/A	#N/A	#N/A	#N/A	#N/A	#N/A	#N/A	#N/A	#N/A	-2.54904	#N/A	#N/A	#N/A	#N/A
Bra003774	#N/A	#N/A	#N/A	#N/A	#N/A	#N/A	#N/A	#N/A	#N/A	#N/A	#N/A	#N/A	#N/A	3.27948	#N/A	#N/A	#N/A	#N/A
Bra016073	#N/A	#N/A	#N/A	#N/A	#N/A	#N/A	#N/A	#N/A	#N/A	#N/A	#N/A	#N/A	#N/A	4.21078	#N/A	#N/A	#N/A	#N/A
Bra016180	#N/A	#N/A	#N/A	#N/A	#N/A	#N/A	#N/A	#N/A	#N/A	#N/A	#N/A	#N/A	#N/A	-2.67651	#N/A	#N/A	#N/A	#N/A
Bra016265	#N/A	#N/A	#N/A	#N/A	#N/A	#N/A	#N/A	#N/A	#N/A	#N/A	#N/A	#N/A	#N/A	-2.29632	#N/A	#N/A	#N/A	#N/A
Bra027864	#N/A	#N/A	#N/A	#N/A	#N/A	#N/A	#N/A	#N/A	#N/A	#N/A	#N/A	#N/A	#N/A	-2.16146	#N/A	#N/A	#N/A	#N/A
Bra030917	#N/A	#N/A	#N/A	#N/A	#N/A	#N/A	#N/A	#N/A	#N/A	#N/A	#N/A	#N/A	#N/A	3.55735	#N/A	#N/A	#N/A	#N/A
Bra018942	#N/A	#N/A	#N/A	#N/A	#N/A	#N/A	#N/A	#N/A	#N/A	#N/A	#N/A	#N/A	#N/A	3.0549	#N/A	#N/A	#N/A	#N/A
Bra010819	#N/A	#N/A	#N/A	#N/A	#N/A	#N/A	#N/A	#N/A	#N/A	#N/A	#N/A	#N/A	#N/A	-2.37133	-2.37133	#N/A	#N/A	#N/A
Bra032309	#N/A	#N/A	#N/A	#N/A	#N/A	#N/A	#N/A	#N/A	#N/A	#N/A	#N/A	#N/A	#N/A	-2.92585	#N/A	#N/A	#N/A	#N/A
Bra010879	#N/A	#N/A	#N/A	#N/A	#N/A	#N/A	#N/A	#N/A	#N/A	#N/A	#N/A	#N/A	#N/A	-2.46722	-2.46722	#N/A	-2.46722	-2.46722
Bra012363	#N/A	#N/A	#N/A	#N/A	#N/A	#N/A	#N/A	#N/A	#N/A	#N/A	#N/A	#N/A	#N/A	-2.74139	#N/A	#N/A	#N/A	#N/A
Bra025798	#N/A	#N/A	#N/A	#N/A	#N/A	#N/A	#N/A	#N/A	#N/A	#N/A	#N/A	#N/A	#N/A	2.36992	#N/A	#N/A	#N/A	#N/A
Bra025756	#N/A	#N/A	#N/A	#N/A	#N/A	#N/A	#N/A	#N/A	#N/A	#N/A	#N/A	#N/A	#N/A	3.4091	#N/A	#N/A	#N/A	#N/A
Bra025723	#N/A	#N/A	#N/A	#N/A	#N/A	#N/A	#N/A	#N/A	#N/A	#N/A	#N/A	#N/A	#N/A	2.68912	2.68912	#N/A	#N/A	#N/A
Bra026170	#N/A	#N/A	#N/A	#N/A	#N/A	#N/A	#N/A	#N/A	#N/A	#N/A	#N/A	#N/A	#N/A	-5.13233	-5.13233	#N/A	#N/A	#N/A
Bra026176	#N/A	#N/A	#N/A	#N/A	#N/A	#N/A	#N/A	#N/A	#N/A	#N/A	#N/A	#N/A	#N/A	-7.54335	#N/A	#N/A	#N/A	#N/A
Bra026804	#N/A	#N/A	#N/A	#N/A	#N/A	#N/A	#N/A	#N/A	#N/A	#N/A	#N/A	#N/A	#N/A	-2.89541	-2.89541	#N/A	#N/A	#N/A
Bra019656	#N/A	#N/A	#N/A	#N/A	#N/A	#N/A	#N/A	#N/A	#N/A	#N/A	#N/A	#N/A	#N/A	2.21922	#N/A	#N/A	#N/A	#N/A
Bra026986	#N/A	#N/A	#N/A	#N/A	#N/A	#N/A	#N/A	#N/A	#N/A	#N/A	#N/A	#N/A	#N/A	4.25947	#N/A	#N/A	#N/A	#N/A
Bra018294	#N/A	#N/A	#N/A	#N/A	#N/A	#N/A	#N/A	#N/A	#N/A	#N/A	#N/A	#N/A	#N/A	-2.05239	#N/A	#N/A	#N/A	#N/A
Bra030507	#N/A	#N/A	#N/A	#N/A	#N/A	#N/A	#N/A	#N/A	#N/A	#N/A	#N/A	#N/A	#N/A	-3.94907	#N/A	#N/A	#N/A	#N/A
Bra032601	#N/A	#N/A	#N/A	#N/A	#N/A	#N/A	#N/A	#N/A	#N/A	#N/A	#N/A	#N/A	#N/A	2.01343	#N/A	#N/A	#N/A	#N/A
Bra012088	#N/A	#N/A	#N/A	#N/A	#N/A	#N/A	#N/A	#N/A	#N/A	#N/A	#N/A	#N/A	#N/A	#N/A	-3.59918	#N/A	#N/A	#N/A
Bra031927	#N/A	#N/A	#N/A	#N/A	#N/A	#N/A	#N/A	#N/A	#N/A	#N/A	#N/A	#N/A	#N/A	#N/A	-2.14585	#N/A	#N/A	#N/A
Bra038608	#N/A	#N/A	#N/A	#N/A	#N/A	#N/A	#N/A	#N/A	#N/A	#N/A	#N/A	#N/A	#N/A	#N/A	-2.3307	#N/A	#N/A	#N/A
Bra010096	#N/A	#N/A	#N/A	#N/A	#N/A	#N/A	#N/A	#N/A	#N/A	#N/A	#N/A	#N/A	#N/A	#N/A	-4.01894	#N/A	-4.01894	-4.01894
Bra029259	#N/A	#N/A	#N/A	#N/A	#N/A	#N/A	#N/A	#N/A	#N/A	#N/A	#N/A	#N/A	#N/A	#N/A	-2.91238	#N/A	-2.91238	-2.91238
Bra006809	#N/A	#N/A	#N/A	#N/A	#N/A	#N/A	#N/A	#N/A	#N/A	#N/A	#N/A	#N/A	#N/A	#N/A	3.29961	#N/A	3.29961	3.29961
Bra020438	#N/A	#N/A	#N/A	#N/A	#N/A	#N/A	#N/A	#N/A	#N/A	#N/A	#N/A	#N/A	#N/A	#N/A	-2.51775	#N/A	#N/A	#N/A
Bra002944	#N/A	#N/A	#N/A	#N/A	#N/A	#N/A	#N/A	#N/A	#N/A	#N/A	#N/A	#N/A	#N/A	#N/A	-2.1197	#N/A	#N/A	#N/A
Bra022723	#N/A	#N/A	#N/A	#N/A	#N/A	#N/A	#N/A	#N/A	#N/A	#N/A	#N/A	#N/A	#N/A	#N/A	-3.31626	#N/A	#N/A	#N/A
Bra010035	#N/A	#N/A	#N/A	#N/A	#N/A	#N/A	#N/A	#N/A	#N/A	#N/A	#N/A	#N/A	#N/A	#N/A	-3.87597	#N/A	-3.87597	-3.87597
Bra025061	#N/A	#N/A	#N/A	#N/A	#N/A	#N/A	#N/A	#N/A	#N/A	#N/A	#N/A	#N/A	#N/A	#N/A	-2.15563	#N/A	#N/A	#N/A
Bra027569	#N/A	#N/A	#N/A	#N/A	#N/A	#N/A	#N/A	#N/A	#N/A	#N/A	#N/A	#N/A	#N/A	#N/A	-2.1723	#N/A	#N/A	#N/A
Bra027981	#N/A	#N/A	#N/A	#N/A	#N/A	#N/A	#N/A	#N/A	#N/A	#N/A	#N/A	#N/A	#N/A	#N/A	-3.55655	-3.55655	#N/A	#N/A
Bra025450	#N/A	#N/A	#N/A	#N/A	#N/A	#N/A	#N/A	#N/A	#N/A	#N/A	#N/A	#N/A	#N/A	#N/A	-2.06406	#N/A	#N/A	#N/A
Bra028485	#N/A	#N/A	#N/A	#N/A	#N/A	#N/A	#N/A	#N/A	#N/A	#N/A	#N/A	#N/A	#N/A	#N/A	-3.61621	#N/A	#N/A	#N/A
Bra006178	#N/A	#N/A	#N/A	#N/A	#N/A	#N/A	#N/A	#N/A	#N/A	#N/A	#N/A	#N/A	#N/A	#N/A	3.53692	#N/A	#N/A	#N/A
Bra011739	#N/A	#N/A	#N/A	#N/A	#N/A	#N/A	#N/A	#N/A	#N/A	#N/A	#N/A	#N/A	#N/A	#N/A	-3.84916	#N/A	#N/A	#N/A
Bra026262	#N/A	#N/A	#N/A	#N/A	#N/A	#N/A	#N/A	#N/A	#N/A	#N/A	#N/A	#N/A	#N/A	#N/A	-3.3587	#N/A	#N/A	#N/A
Bra024088	#N/A	#N/A	#N/A	#N/A	#N/A	#N/A	#N/A	#N/A	#N/A	#N/A	#N/A	#N/A	#N/A	#N/A	-2.18778	#N/A	#N/A	#N/A
Bra024126	#N/A	#N/A	#N/A	#N/A	#N/A	#N/A	#N/A	#N/A	#N/A	#N/A	#N/A	#N/A	#N/A	#N/A	-4.60522	#N/A	#N/A	#N/A
Bra024213	#N/A	#N/A	#N/A	#N/A	#N/A	#N/A	#N/A	#N/A	#N/A	#N/A	#N/A	#N/A	#N/A	#N/A	2.5117	#N/A	#N/A	#N/A
Bra019035	#N/A	#N/A	#N/A	#N/A	#N/A	#N/A	#N/A	#N/A	#N/A	#N/A	#N/A	#N/A	#N/A	#N/A	-3.09496	#N/A	#N/A	#N/A
Bra002984	#N/A	#N/A	#N/A	#N/A	#N/A	#N/A	#N/A	#N/A	#N/A	#N/A	#N/A	#N/A	#N/A	#N/A	-2.38975	#N/A	#N/A	#N/A
Bra026395	#N/A	#N/A	#N/A	#N/A	#N/A	#N/A	#N/A	#N/A	#N/A	#N/A	#N/A	#N/A	#N/A	#N/A	-2.98864	#N/A	#N/A	#N/A
Bra013815	#N/A	#N/A	#N/A	#N/A	#N/A	#N/A	#N/A	#N/A	#N/A	#N/A	#N/A	#N/A	#N/A	#N/A	-2.98048	#N/A	#N/A	#N/A
Bra019357	#N/A	#N/A	#N/A	#N/A	#N/A	#N/A	#N/A	#N/A	#N/A	#N/A	#N/A	#N/A	#N/A	#N/A	-2.85292	#N/A	#N/A	#N/A
Bra032293	#N/A	#N/A	#N/A	#N/A	#N/A	#N/A	#N/A	#N/A	#N/A	#N/A	#N/A	#N/A	#N/A	#N/A	-4.35002	#N/A	#N/A	#N/A
Bra014379	#N/A	#N/A	#N/A	#N/A	#N/A	#N/A	#N/A	#N/A	#N/A	#N/A	#N/A	#N/A	#N/A	#N/A	2.12427	#N/A	#N/A	#N/A
Bra028533	#N/A	#N/A	#N/A	#N/A	#N/A	#N/A	#N/A	#N/A	#N/A	#N/A	#N/A	#N/A	#N/A	#N/A	-2.71734	#N/A	#N/A	#N/A
Bra025161	#N/A	#N/A	#N/A	#N/A	#N/A	#N/A	#N/A	#N/A	#N/A	#N/A	#N/A	#N/A	#N/A	#N/A	-2.18483	#N/A	#N/A	#N/A
Bra029641	#N/A	#N/A	#N/A	#N/A	#N/A	#N/A	#N/A	#N/A	#N/A	#N/A	#N/A	#N/A	#N/A	#N/A	-2.78961	#N/A	#N/A	#N/A
Bra032001	#N/A	#N/A	#N/A	#N/A	#N/A	#N/A	#N/A	#N/A	#N/A	#N/A	#N/A	#N/A	#N/A	#N/A	-3.00095	#N/A	#N/A	#N/A
Bra005572	#N/A	#N/A	#N/A	#N/A	#N/A	#N/A	#N/A	#N/A	#N/A	#N/A	#N/A	#N/A	#N/A	#N/A	-3.63303	#N/A	#N/A	#N/A
Bra038517	#N/A	#N/A	#N/A	#N/A	#N/A	#N/A	#N/A	#N/A	#N/A	#N/A	#N/A	#N/A	#N/A	#N/A	-2.51612	#N/A	#N/A	#N/A
Bra026570	#N/A	#N/A	#N/A	#N/A	#N/A	#N/A	#N/A	#N/A	#N/A	#N/A	#N/A	#N/A	#N/A	#N/A	3.38452	#N/A	#N/A	#N/A
Bra015727	#N/A	#N/A	#N/A	#N/A	#N/A	#N/A	#N/A	#N/A	#N/A	#N/A	#N/A	#N/A	#N/A	#N/A	-2.84852	#N/A	#N/A	#N/A
Bra008267	#N/A	#N/A	#N/A	#N/A	#N/A	#N/A	#N/A	#N/A	#N/A	#N/A	#N/A	#N/A	#N/A	#N/A	-3.14389	#N/A	#N/A	#N/A
Bra015881	#N/A	#N/A	#N/A	#N/A	#N/A	#N/A	#N/A	#N/A	#N/A	#N/A	#N/A	#N/A	#N/A	#N/A	2.85297	#N/A	#N/A	#N/A
Bra016025	#N/A	#N/A	#N/A	#N/A	#N/A	#N/A	#N/A	#N/A	#N/A	#N/A	#N/A	#N/A	#N/A	#N/A	2.34554	#N/A	#N/A	#N/A
Bra007906	#N/A	#N/A	#N/A	#N/A	#N/A	#N/A	#N/A	#N/A	#N/A	#N/A	#N/A	#N/A	#N/A	#N/A	-2.24884	#N/A	#N/A	#N/A
Bra007887	#N/A	#N/A	#N/A	#N/A	#N/A	#N/A	#N/A	#N/A	#N/A	#N/A	#N/A	#N/A	#N/A	#N/A	-5.66532	#N/A	#N/A	#N/A
Bra004022	#N/A	#N/A	#N/A	#N/A	#N/A	#N/A	#N/A	#N/A	#N/A	#N/A	#N/A	#N/A	#N/A	#N/A	-2.12477	#N/A	#N/A	#N/A
Bra027618	#N/A	#N/A	#N/A	#N/A	#N/A	#N/A	#N/A	#N/A	#N/A	#N/A	#N/A	#N/A	#N/A	#N/A	-2.48286	#N/A	#N/A	#N/A
Bra039694	#N/A	#N/A	#N/A	#N/A	#N/A	#N/A	#N/A	#N/A	#N/A	#N/A	#N/A	#N/A	#N/A	#N/A	-2.03614	#N/A	#N/A	#N/A
Bra038111	#N/A	#N/A	#N/A	#N/A	#N/A	#N/A	#N/A	#N/A	#N/A	#N/A	#N/A	#N/A	#N/A	#N/A	-2.05191	#N/A	-2.05191	-2.05191
Bra024611	#N/A	#N/A	#N/A	#N/A	#N/A	#N/A	#N/A	#N/A	#N/A	#N/A	#N/A	#N/A	#N/A	#N/A	-2.53738	#N/A	#N/A	#N/A
Bra031061	#N/A	#N/A	#N/A	#N/A	#N/A	#N/A	#N/A	#N/A	#N/A	#N/A	#N/A	#N/A	#N/A	#N/A	-3.54794	-3.54794	#N/A	#N/A
Bra025917	#N/A	#N/A	#N/A	#N/A	#N/A	#N/A	#N/A	#N/A	#N/A	#N/A	#N/A	#N/A	#N/A	#N/A	-3.29782	#N/A	#N/A	#N/A
Bra026864	#N/A	#N/A	#N/A	#N/A	#N/A	#N/A	#N/A	#N/A	#N/A	#N/A	#N/A	#N/A	#N/A	#N/A	3.7146	#N/A	#N/A	#N/A
Bra031656	#N/A	#N/A	#N/A	#N/A	#N/A	#N/A	#N/A	#N/A	#N/A	#N/A	#N/A	#N/A	#N/A	#N/A	-2.40425	#N/A	#N/A	#N/A
Bra030674	#N/A	#N/A	#N/A	#N/A	#N/A	#N/A	#N/A	#N/A	#N/A	#N/A	#N/A	#N/A	#N/A	#N/A	-2.71025	#N/A	#N/A	#N/A
Bra030526	#N/A	#N/A	#N/A	#N/A	#N/A	#N/A	#N/A	#N/A	#N/A	#N/A	#N/A	#N/A	#N/A	#N/A	-2.74352	#N/A	-2.74352	-2.74352
Bra006727	#N/A	#N/A	#N/A	#N/A	#N/A	#N/A	#N/A	#N/A	#N/A	#N/A	#N/A	#N/A	#N/A	#N/A	#N/A	-3.1139	#N/A	#N/A
Bra001986	#N/A	#N/A	#N/A	#N/A	#N/A	#N/A	#N/A	#N/A	#N/A	#N/A	#N/A	#N/A	#N/A	#N/A	#N/A	-2.59949	#N/A	#N/A
Bra009876	#N/A	#N/A	#N/A	#N/A	#N/A	#N/A	#N/A	#N/A	#N/A	#N/A	#N/A	#N/A	#N/A	#N/A	#N/A	-2.42498	#N/A	#N/A
Bra002271	#N/A	#N/A	#N/A	#N/A	#N/A	#N/A	#N/A	#N/A	#N/A	#N/A	#N/A	#N/A	#N/A	#N/A	#N/A	-2.94351	#N/A	#N/A
Bra020071	#N/A	#N/A	#N/A	#N/A	#N/A	#N/A	#N/A	#N/A	#N/A	#N/A	#N/A	#N/A	#N/A	#N/A	#N/A	7.06989	#N/A	#N/A
Bra008715	#N/A	#N/A	#N/A	#N/A	#N/A	#N/A	#N/A	#N/A	#N/A	#N/A	#N/A	#N/A	#N/A	#N/A	#N/A	-5.93894	#N/A	#N/A
Bra009221	#N/A	#N/A	#N/A	#N/A	#N/A	#N/A	#N/A	#N/A	#N/A	#N/A	#N/A	#N/A	#N/A	#N/A	#N/A	2.88942	#N/A	#N/A
Bra011438	#N/A	#N/A	#N/A	#N/A	#N/A	#N/A	#N/A	#N/A	#N/A	#N/A	#N/A	#N/A	#N/A	#N/A	#N/A	-2.04672	#N/A	#N/A
Bra025325	#N/A	#N/A	#N/A	#N/A	#N/A	#N/A	#N/A	#N/A	#N/A	#N/A	#N/A	#N/A	#N/A	#N/A	#N/A	-3.99702	#N/A	#N/A
Bra001067	#N/A	#N/A	#N/A	#N/A	#N/A	#N/A	#N/A	#N/A	#N/A	#N/A	#N/A	#N/A	#N/A	#N/A	#N/A	-3.60165	#N/A	#N/A
Bra003833	#N/A	#N/A	#N/A	#N/A	#N/A	#N/A	#N/A	#N/A	#N/A	#N/A	#N/A	#N/A	#N/A	#N/A	#N/A	-2.2155	#N/A	#N/A
Bra008037	#N/A	#N/A	#N/A	#N/A	#N/A	#N/A	#N/A	#N/A	#N/A	#N/A	#N/A	#N/A	#N/A	#N/A	#N/A	-2.95221	#N/A	#N/A
Bra027156	#N/A	#N/A	#N/A	#N/A	#N/A	#N/A	#N/A	#N/A	#N/A	#N/A	#N/A	#N/A	#N/A	#N/A	#N/A	-2.07376	#N/A	#N/A
Bra018953	#N/A	#N/A	#N/A	#N/A	#N/A	#N/A	#N/A	#N/A	#N/A	#N/A	#N/A	#N/A	#N/A	#N/A	#N/A	2.25295	#N/A	#N/A
Bra031690	#N/A	#N/A	#N/A	#N/A	#N/A	#N/A	#N/A	#N/A	#N/A	#N/A	#N/A	#N/A	#N/A	#N/A	#N/A	-3.47153	#N/A	#N/A
Bra036140	#N/A	#N/A	#N/A	#N/A	#N/A	#N/A	#N/A	#N/A	#N/A	#N/A	#N/A	#N/A	#N/A	#N/A	#N/A	#N/A	-2.21262	-2.21262
Bra024992	#N/A	#N/A	#N/A	#N/A	#N/A	#N/A	#N/A	#N/A	#N/A	#N/A	#N/A	#N/A	#N/A	#N/A	#N/A	#N/A	-2.02486	-2.02486
Bra037386	#N/A	#N/A	#N/A	#N/A	#N/A	#N/A	#N/A	#N/A	#N/A	#N/A	#N/A	#N/A	#N/A	#N/A	#N/A	#N/A	-2.73573	-2.73573
Bra019570	#N/A	#N/A	#N/A	#N/A	#N/A	#N/A	#N/A	#N/A	#N/A	#N/A	#N/A	#N/A	#N/A	#N/A	#N/A	#N/A	2.04321	2.04321
Bra004736	#N/A	#N/A	#N/A	#N/A	#N/A	#N/A	#N/A	#N/A	#N/A	#N/A	#N/A	#N/A	#N/A	#N/A	#N/A	#N/A	4.38428	4.38428
Bra004155	#N/A	#N/A	#N/A	#N/A	#N/A	#N/A	#N/A	#N/A	#N/A	#N/A	#N/A	#N/A	#N/A	#N/A	#N/A	#N/A	-2.29971	-2.29971
Bra033257	#N/A	#N/A	#N/A	#N/A	#N/A	#N/A	#N/A	#N/A	#N/A	#N/A	#N/A	#N/A	#N/A	#N/A	#N/A	#N/A	-3.17061	-3.17061
Bra002110	#N/A	#N/A	#N/A	#N/A	#N/A	#N/A	#N/A	#N/A	#N/A	#N/A	#N/A	#N/A	#N/A	#N/A	#N/A	#N/A	#N/A	-2.33733

## Sheet: Sheet3
Gene_ID	Temp.	Photosyn.	Light	Gibberelllin	Water depri.	Heat	Ethylene	ABA	Circadian	Glucosinolate	Salicylic	Jasmonate	Cold	defense	Cell stress	Oxidative	salt stress	osmoticstress
Bra037845	-2.45345							-2.45345					-2.45345				-2.45345	-2.45345
Bra029258	-2.333				-2.333			-2.333			-2.333		-2.333	-2.333			-2.333	-2.333
Bra029292	-4.13052					-4.13052									-4.13052
Bra029301	-2.14694													-2.14694
Bra029309	2.07297					2.07297									2.07297		2.07297	2.07297
Bra006692	-2.46053		-2.46053			-2.46053							-2.46053		-2.46053	-2.46053	-2.46053	-2.46053
Bra006749	2.31478				2.31478			2.31478					2.31478				2.31478	2.31478
Bra010292	2.14932					2.14932							2.14932		2.14932
Bra022722	-2.2994												-2.2994		-2.2994
Bra035732	-2.19088					-2.19088	-2.19088
Bra037477	-3.06229					-3.06229									-3.06229
Bra024953	-2.90961						-2.90961						-2.90961	-2.90961
Bra033648	5.79749		5.79749					5.79749	5.79749				5.79749
Bra025439	-2.82935		-2.82935			-2.82935		-2.82935					-2.82935	-2.82935		-2.82935
Bra006567	4.2334												4.2334
Bra002283	-3.7908		-3.7908										-3.7908		-3.7908	-3.7908
Bra006195	2.57512				2.57512		2.57512	2.57512		2.57512	2.57512	2.57512	2.57512		2.57512		2.57512	2.57512
Bra008920	-3.25852					-3.25852									-3.25852	-3.25852	-3.25852	-3.25852
Bra028759	-2.36305		-2.36305		-2.36305	-2.36305									-2.36305	-2.36305
Bra011891	2.0934												2.0934
Bra033570	-2.80361					-2.80361
Bra017839	-3.48029										-3.48029		-3.48029			-3.48029
Bra009229	-2.29491							-2.29491				-2.29491	-2.29491			-2.29491	-2.29491	-2.29491
Bra017628	-3.42827												-3.42827		-3.42827
Bra034595	4.66053		4.66053					4.66053	4.66053				4.66053
Bra026317	-2.16347		-2.16347			-2.16347										-2.16347
Bra010441	2.06747					2.06747		2.06747					2.06747
Bra019162	-2.51408												-2.51408
Bra020865	3.09006					3.09006										3.09006	3.09006	3.09006
Bra040169	-4.44398				-4.44398			-4.44398					-4.44398				-4.44398	-4.44398
Bra026230	2.25682												2.25682
Bra000775	3.59572							3.59572					3.59572	3.59572			3.59572	3.59572
Bra018477	-3.13477		-3.13477			-3.13477										-3.13477
Bra039693	2.12154												2.12154	2.12154	2.12154		2.12154	2.12154
Bra000876	4.31664												4.31664	4.31664			4.31664	4.31664
Bra036278	-2.49317												-2.49317
Bra014430	-2.20482												-2.20482		-2.20482
Bra007315	3.91011												3.91011	3.91011
Bra007205	-3.40209												-3.40209	-3.40209	-3.40209
Bra007177	-5.94674												-5.94674		-5.94674
Bra012828	-3.62574		-3.62574			-3.62574									-3.62574
Bra019599	-3.10933												-3.10933	-3.10933	-3.10933
Bra018065	4.9916							4.9916	4.9916		4.9916	4.9916	4.9916			4.9916	4.9916	4.9916
Bra038281	-2.33328		-2.33328		-2.33328			-2.33328					-2.33328	-2.33328	-2.33328	-2.33328	-2.33328	-2.33328
Bra025297	-5.0703	-5.0703	-5.0703		-5.0703			-5.0703					-5.0703
Bra017351	3.10252												3.10252
Bra015048	-2.84921				-2.84921	-2.84921	-2.84921	-2.84921							-2.84921
Bra001907	-3.59904				-3.59904		-3.59904					-3.59904	-3.59904				-3.59904	-3.59904
Bra001885	-2.30077					-2.30077									-2.30077
Bra031349	2.18045				2.18045								2.18045				2.18045	2.18045
Bra022161	2.39904											2.39904	2.39904				2.39904	2.39904
Bra027359	-2.6033									-2.6033			-2.6033	-2.6033
Bra038734	-2.83406		-2.83406			-2.83406									-2.83406	-2.83406
Bra034845	-2.45719				-2.45719			-2.45719					-2.45719
Bra029889	-2.26849					-2.26849
Bra001320	-2.21194									-2.21194			-2.21194	-2.21194	-2.21194		-2.21194	-2.21194
Bra029712	-2.6051					-2.6051							-2.6051		-2.6051		-2.6051	-2.6051
Bra004503	-4.70998		-4.70998	-4.70998			-4.70998	-4.70998	-4.70998		-4.70998	-4.70998	-4.70998				-4.70998	-4.70998
Bra014527	-3.63281		-3.63281				-3.63281	-3.63281				-3.63281	-3.63281	-3.63281	-3.63281	-3.63281	-3.63281	-3.63281
Bra000170	-2.70051												-2.70051	-2.70051	-2.70051
Bra018383	-3.16391		-3.16391			-3.16391										-3.16391	-3.16391	-3.16391
Bra000557	-4.23182		-4.23182			-4.23182									-4.23182	-4.23182
Bra038538	-3.48934		-3.48934			-3.48934								-3.48934	-3.48934	-3.48934
Bra031210	3.15573				3.15573				3.15573				3.15573	3.15573			3.15573	3.15573
Bra031180	-2.34881		-2.34881			-2.34881									-2.34881
Bra033022	-3.45059	-3.45059	-3.45059		-3.45059			-3.45059					-3.45059
Bra035150	-2.70465								-2.70465				-2.70465	-2.70465
Bra015733	-2.18346					-2.18346									-2.18346
Bra015922	-4.3701		-4.3701			-4.3701									-4.3701	-4.3701
Bra027083	-2.2298	-2.2298	-2.2298										-2.2298
Bra012949	-5.25722		-5.25722			-5.25722									-5.25722	-5.25722	-5.25722	-5.25722
Bra018216	-2.47306					-2.47306										-2.47306	-2.47306	-2.47306
Bra018964	-2.1468				-2.1468	-2.1468
Bra018850	-2.08524												-2.08524				-2.08524	-2.08524
Bra010922	-2.68262		-2.68262		-2.68262			-2.68262					-2.68262		-2.68262	-2.68262	-2.68262	-2.68262
Bra036022	-2.70172					-2.70172	-2.70172				-2.70172	-2.70172	-2.70172		-2.70172
Bra012251	-2.75204												-2.75204	-2.75204	-2.75204
Bra025832	2.10451		2.10451										2.10451		2.10451	2.10451
Bra031048	-3.61057												-3.61057
Bra026711	-2.52116												-2.52116
Bra026084	-3.0157					-3.0157									-3.0157
Bra026124	2.83779				2.83779	2.83779	2.83779	2.83779			2.83779	2.83779	2.83779	2.83779	2.83779	2.83779
Bra026937	2.07484					2.07484
Bra016763	-6.06985				-6.06985	-6.06985				-6.06985			-6.06985
Bra031663	2.52931												2.52931			2.52931
Bra031657	-3.5257					-3.5257									-3.5257
Bra032474	-2.61237				-2.61237								-2.61237			-2.61237	-2.61237	-2.61237
Bra032613	-2.66138												-2.66138
Bra032622	-3.14596												-3.14596		-3.14596		-3.14596	-3.14596
Bra030496	-4.80101		-4.80101	-4.80101			-4.80101	-4.80101	-4.80101		-4.80101	-4.80101	-4.80101				-4.80101	-4.80101
Bra002999		-3.19806	-3.19806					-3.19806
Bra000708		-2.05672	-2.05672
Bra005424		-2.78445	-2.78445
Bra008216		-2.445
Bra030182		-2.60892	-2.60892
Bra010807		-2.106	-2.106
Bra026099		-2.02632	-2.02632
Bra024339			-2.04062						-2.04062						-2.04062	-2.04062
Bra012972			-2.70884
Bra019118			3.32227	3.32227					3.32227
Bra021965			-5.24685		-5.24685										-5.24685
Bra009735			-2.85758												-2.85758		-2.85758	-2.85758
Bra026485			-2.84234
Bra023317			-2.02839	-2.02839				-2.02839	-2.02839
Bra006085			3.3144
Bra037747			-2.64858
Bra005709			-2.06584						-2.06584
Bra010713			4.30981
Bra033588			-2.16198						-2.16198
Bra039194			3.14088
Bra011332			2.04377
Bra034941			2.08507							2.08507				2.08507	2.08507
Bra019058			-3.17663
Bra026461			2.5276	2.5276					2.5276
Bra040158			-3.27001				-3.27001							-3.27001		-3.27001
Bra012784			-5.60002
Bra014674			-2.22396											-2.22396
Bra019466			-2.25728
Bra023857			-3.40103						-3.40103
Bra031255			-4.12096
Bra001761			3.24396							3.24396
Bra021259			-2.95115												-2.95115
Bra022225			-3.66639
Bra022191			-2.72452
Bra029778			-3.45677	-3.45677			-3.45677	-3.45677	-3.45677		-3.45677	-3.45677					-3.45677	-3.45677
Bra001264			5.74276						5.74276
Bra004507			-3.88147						-3.88147
Bra039338			-2.11198
Bra004718			3.44241
Bra016886			2.68306
Bra017035			6.91239						6.91239
Bra017218			2.0415	2.0415				2.0415			2.0415	2.0415
Bra018249			-3.05805
Bra022805			-3.00126
Bra031619			2.50452
Bra007843			-2.05169
Bra039937			-2.29305
Bra038832			3.73241						3.73241
Bra026572			2.51493
Bra024900			-4.05021											-4.05021	-4.05021
Bra016635			3.25939
Bra003670			-3.6863
Bra015866			-2.03766
Bra016230			-3.32419									-3.32419					-3.32419	-3.32419
Bra007864			2.92623	2.92623
Bra019711			-2.89085								-2.89085			-2.89085
Bra018907			-2.35787													-2.35787
Bra034424			-2.79607
Bra012299			2.43986
Bra026991			3.13716		3.13716
Bra033324			-4.35391
Bra029990				-4.248	-4.248		-4.248	-4.248			-4.248	-4.248		-4.248			-4.248	-4.248
Bra029311				3.0232						3.0232	3.0232	3.0232		3.0232	3.0232
Bra006694				2.83967			2.83967				2.83967	2.83967
Bra036183				-2.23092
Bra023515				2.13565			2.13565				2.13565	2.13565					2.13565	2.13565
Bra028724				2.61838
Bra005751				-3.2615			-3.2615	-3.2615	-3.2615		-3.2615	-3.2615					-3.2615	-3.2615
Bra017759				2.83117
Bra012532				4.68708										4.68708
Bra007378				2.58764
Bra004946				2.35462
Bra016900				2.85219				2.85219
Bra021903				2.63438
Bra016164				-2.83053			-2.83053	-2.83053			-2.83053	-2.83053					-2.83053	-2.83053
Bra003969				-3.79585			-3.79585	-3.79585			-3.79585	-3.79585					-3.79585	-3.79585
Bra036653				-3.02422	-3.02422			-3.02422									-3.02422	-3.02422
Bra006709					-2.82466			-2.82466
Bra002594					-2.02549			-2.02549
Bra029145					-3.34134			-3.34134
Bra013009					2.68023					2.68023
Bra026353					-2.36717			-2.36717
Bra005351					-2.88273			-2.88273									-2.88273	-2.88273
Bra007637					-2.92031			-2.92031										-2.92031
Bra007603					-3.2367
Bra014666					-2.45982										-2.45982		-2.45982	-2.45982
Bra006997					-2.09094			-2.09094
Bra012803					-2.4581									-2.4581
Bra018183					-2.62535			-2.62535								-2.62535	-2.62535	-2.62535
Bra015025					-2.36115
Bra001752					-4.12117			-4.12117									-4.12117	-4.12117
Bra022179					-2.23448
Bra021113					2.38795							2.38795
Bra021558					-3.23576												-3.23576	-3.23576
Bra014426					-2.67258						-2.67258	-2.67258		-2.67258	-2.67258
Bra000203					4.53342		4.53342				4.53342	4.53342		4.53342		4.53342		4.53342
Bra023103					-2.48648			-2.48648
Bra017278					-2.75242									-2.75242
Bra036901					2.01241			2.01241							2.01241
Bra023278					-3.0184													-3.0184
Bra024539					-4.34445		-4.34445								-4.34445
Bra026062					2.19699										2.19699		2.19699	2.19699
Bra031903							2.72632	2.72632						2.72632				2.72632
Bra029302							2.25427							2.25427
Bra028291							-5.21386			-5.21386				-5.21386
Bra006599							-4.10502
Bra008952							-2.33969
Bra009250							4.27494
Bra011833							2.18359
Bra011749							-2.59879	-2.59879		-2.59879	-2.59879	-2.59879					-2.59879	-2.59879
Bra017656							-6.20964							-6.20964
Bra011383							-2.87256
Bra012910							-3.99209				-3.99209
Bra013226							-2.14112								-2.14112	-2.14112
Bra023756							2.39781								2.39781
Bra030957							-3.50557	-3.50557				-3.50557		-3.50557	-3.50557
Bra001122							4.72944							4.72944			4.72944	4.72944
Bra037630							-4.61055							-4.61055
Bra004449							2.19697
Bra021712							3.31568							3.31568
Bra013123							3.41072				3.41072	3.41072		3.41072
Bra015882							-3.30023							-3.30023
Bra008032							-2.4744								-2.4744
Bra003883							2.53113								2.53113
Bra016136							-5.72598
Bra027736							-2.44745
Bra010210							-4.02874
Bra032901							-5.32533
Bra010881							-3.22061							-3.22061
Bra031069							-6.05413
Bra016518							-4.93862
Bra025914							-2.14724		-2.14724								-2.14724	-2.14724
Bra031798							3.69542							3.69542	3.69542	3.69542	3.69542	3.69542
Bra029093								2.3093
Bra028290								-6.13537		-6.13537
Bra025012								4.33605
Bra009294								-4.23529
Bra023576								-2.01062
Bra023398								-2.25029
Bra008850								2.37544			2.37544				2.37544			2.37544
Bra006862								-2.44457						-2.44457
Bra025280								-2.44465									-2.44465	-2.44465
Bra013714								2.77657				2.77657					2.77657	2.77657
Bra013426								3.36947				3.36947					3.36947	3.36947
Bra029496								3.3589
Bra007334								-4.89487									-4.89487	-4.89487
Bra006975								2.32218
Bra025400								-2.50962
Bra036353								-2.07191
Bra001789								-2.31436
Bra006218								-2.04536
Bra001422								-3.09588						-3.09588
Bra031431								2.02228
Bra004748								2.3761
Bra005071								4.2581
Bra022772								-3.64997						-3.64997
Bra004004								-2.20745
Bra004330								-3.62253							-3.62253
Bra027664								-2.56554
Bra031435								-2.91021			-2.91021	-2.91021			-2.91021		-2.91021	-2.91021
Bra039700								-2.20253
Bra033239								-2.54767							-2.54767
Bra012964									2.67773
Bra033809									3.67006
Bra023610									-3.02225
Bra005984									-2.32912
Bra009302									-2.9048
Bra007099									-3.13731
Bra003187									-2.71697
Bra018204									4.96642
Bra035742									7.07217
Bra027323									4.26212
Bra034762									-4.9707
Bra021480									-2.2659
Bra035954										-2.93833		-2.93833		-2.93833	-2.93833
Bra022302										2.18791
Bra037456										-2.42311					-2.42311
Bra039495										2.30022
Bra023450										2.70823		2.70823					2.70823	2.70823
Bra011757										-2.04304
Bra032734										2.73574
Bra000760										3.22865		3.22865
Bra004840										6.71069							6.71069	6.71069
Bra039038										-3.09155
Bra013227										-2.43895				-2.43895
Bra021175										-2.34857
Bra001411										2.30281
Bra021672										2.23962
Bra015935										2.20475		2.20475		2.20475
Bra015938										2.58615
Bra012409										-2.14639				-2.14639
Bra016432										3.10014
Bra012270										2.33847
Bra025668										2.43194
Bra026058										3.0285
Bra030589										-3.55856					-3.55856
Bra038612											-2.13242					-2.13242
Bra020197											2.98463			2.98463
Bra006194											3.12442			3.12442	3.12442
Bra005891											-3.20365			-3.20365	-3.20365
Bra023211											2.74276			2.74276
Bra019324											2.89443			2.89443
Bra020821											2.82978			2.82978
Bra001549											2.92906	2.92906		2.92906
Bra004994											-4.75263			-4.75263	-4.75263	-4.75263
Bra022905											-3.31252	-3.31252		-3.31252
Bra013138											4.38917			4.38917
Bra017373											-3.79771			-3.79771			-3.79771	-3.79771
Bra003588											-4.51987			-4.51987
Bra003598											3.46075			3.46075
Bra015912											-2.41281	-2.41281
Bra016002											3.03309			3.03309		3.03309	3.03309	3.03309
Bra032911											-3.79739	-3.79739
Bra025884											3.25447			3.25447
Bra026104											3.04248
Bra019862											2.04603			2.04603
Bra015435											2.00665
Bra024328												2.03124		2.03124
Bra035641												-3.52701		-3.52701
Bra009300												3.33844
Bra028752												2.72881
Bra011636												-4.0791				-4.0791
Bra023998												-2.3913		-2.3913
Bra021082												2.98581
Bra035236												-3.0542		-3.0542		-3.0542
Bra004058												3.57838
Bra021114												2.05864
Bra017132												4.10151
Bra022981												-5.09672		-5.09672
Bra007828												2.05411
Bra031065												-3.48142		-3.48142
Bra032362												-2.86185		-2.86185
Bra025713												-2.21268		-2.21268
Bra025951												-3.90362		-3.90362
Bra037139														-2.1463
Bra012058								-3.54359						-3.54359
Bra009663								-3.44863						-3.44863
Bra010099														-3.18876
Bra028980														4.45988
Bra010032														-2.21005
Bra006366														2.30562
Bra024988														-2.14786
Bra027588														2.61184
Bra025547														3.49732
Bra033077														-2.19888
Bra028436														-2.1687		-2.1687
Bra009783														-2.4971	-2.4971		-2.4971	-2.4971
Bra009774														-2.29421	-2.29421
Bra002400														-2.66027
Bra002355														3.76795		3.76795	3.76795	3.76795
Bra008719														-3.02078
Bra009037														-2.32822
Bra009223														2.9609
Bra021239														4.56611
Bra010706														2.22674			2.22674	2.22674
Bra011722														2.51616
Bra011208														2.22825
Bra019295														-2.16487	-2.16487
Bra013683														2.36433
Bra020820														3.65714
Bra020827														-2.64543		-2.64543
Bra013678														-2.24602
Bra013476														-3.07571		-3.07571
Bra021039														2.5723
Bra033549														3.14363			3.14363	3.14363
Bra033482														-4.43099
Bra002653														-2.21729
Bra036269														-2.44627
Bra037368														-2.34425	-2.34425
Bra033984														-6.45195
Bra007195														-4.47024
Bra033436														-3.37074
Bra012898														2.43201	2.43201
Bra018051														-4.46085
Bra038289														2.61822
Bra025169														3.91453
Bra015120														-2.2437	-2.2437	-2.2437
Bra001905														-2.44389	-2.44389
Bra038205														-2.37717
Bra001639														-2.25825
Bra001454														4.03918	4.03918
Bra038683														2.06538
Bra001367														2.32705
Bra040061														-2.66255
Bra000441														5.50375	5.50375
Bra000889														5.73183
Bra039316														-3.00577
Bra000382														4.37344
Bra004772														4.03571
Bra000311														3.74683
Bra004771														3.88769
Bra000122														2.82206
Bra017148														-2.62944
Bra021861														-3.63477
Bra022815														2.61992
Bra039982														2.15148
Bra000508														-3.33758
Bra034321														-2.74496
Bra039217														-3.49345
Bra039006														2.63974	2.63974	2.63974
Bra028091														3.56291
Bra002076														-3.56091
Bra033198														-2.40517
Bra024809														-2.9119	-2.9119
Bra026653														-2.54904
Bra003774														3.27948
Bra016073														4.21078
Bra016180														-2.67651
Bra016265														-2.29632
Bra027864														-2.16146
Bra030917														3.55735
Bra018942														3.0549
Bra010819														-2.37133	-2.37133
Bra032309														-2.92585
Bra010879														-2.46722	-2.46722		-2.46722	-2.46722
Bra012363														-2.74139
Bra025798														2.36992
Bra025756														3.4091
Bra025723														2.68912	2.68912
Bra026170														-5.13233	-5.13233
Bra026176														-7.54335
Bra026804														-2.89541	-2.89541
Bra019656														2.21922
Bra026986														4.25947
Bra018294														-2.05239
Bra030507														-3.94907
Bra032601														2.01343
Bra012088															-3.59918
Bra031927															-2.14585
Bra038608															-2.3307
Bra010096															-4.01894		-4.01894	-4.01894
Bra029259															-2.91238		-2.91238	-2.91238
Bra006809															3.29961		3.29961	3.29961
Bra020438															-2.51775
Bra002944															-2.1197
Bra022723															-3.31626
Bra010035															-3.87597		-3.87597	-3.87597
Bra025061															-2.15563
Bra027569															-2.1723
Bra027981															-3.55655	-3.55655
Bra025450															-2.06406
Bra028485															-3.61621
Bra006178															3.53692
Bra011739															-3.84916
Bra026262															-3.3587
Bra024088															-2.18778
Bra024126															-4.60522
Bra024213															2.5117
Bra019035															-3.09496
Bra002984															-2.38975
Bra026395															-2.98864
Bra013815															-2.98048
Bra019357															-2.85292
Bra032293															-4.35002
Bra014379															2.12427
Bra028533															-2.71734
Bra025161															-2.18483
Bra029641															-2.78961
Bra032001															-3.00095
Bra005572															-3.63303
Bra038517															-2.51612
Bra026570															3.38452
Bra015727															-2.84852
Bra008267															-3.14389
Bra015881															2.85297
Bra016025															2.34554
Bra007906															-2.24884
Bra007887															-5.66532
Bra004022															-2.12477
Bra027618															-2.48286
Bra039694															-2.03614
Bra038111															-2.05191		-2.05191	-2.05191
Bra024611															-2.53738
Bra031061															-3.54794	-3.54794
Bra025917															-3.29782
Bra026864															3.7146
Bra031656															-2.40425
Bra030674															-2.71025
Bra030526															-2.74352		-2.74352	-2.74352
Bra006727																-3.1139
Bra001986																-2.59949
Bra009876																-2.42498
Bra002271																-2.94351
Bra020071																7.06989
Bra008715																-5.93894
Bra009221																2.88942
Bra011438																-2.04672
Bra025325																-3.99702
Bra001067																-3.60165
Bra003833																-2.2155
Bra008037																-2.95221
Bra027156																-2.07376
Bra018953																2.25295
Bra031690																-3.47153
Bra036140																	-2.21262	-2.21262
Bra024992																	-2.02486	-2.02486
Bra037386																	-2.73573	-2.73573
Bra019570																	2.04321	2.04321
Bra004736																	4.38428	4.38428
Bra004155																	-2.29971	-2.29971
Bra033257																	-3.17061	-3.17061
Bra002110																		-2.33733

## Sheet: all-temp
Gene_ID	Cold	Heat
Bra016763	-6.06985	-6.06985
Bra007177	-5.94674	0
Bra025439	-2.82935	-2.82935
Bra036022	-2.70172	-2.70172
Bra012949	0	-5.25722
Bra029712	-2.6051	-2.6051
Bra025297	-5.0703	0
Bra006692	-2.46053	-2.46053
Bra030496	-4.80101	0
Bra004503	-4.70998	0
Bra040169	-4.44398	0
Bra015922	0	-4.3701
Bra000557	0	-4.23182
Bra029292	0	-4.13052
Bra002283	-3.7908	0
Bra014527	-3.63281	0
Bra012828	0	-3.62574
Bra031048	-3.61057	0
Bra001907	-3.59904	0
Bra031657	0	-3.5257
Bra038538	0	-3.48934
Bra017839	-3.48029	0
Bra033022	-3.45059	0
Bra017628	-3.42827	0
Bra007205	-3.40209	0
Bra008920	0	-3.25852
Bra018383	0	-3.16391
Bra032622	-3.14596	0
Bra018477	0	-3.13477
Bra019599	-3.10933	0
Bra037477	0	-3.06229
Bra026084	0	-3.0157
Bra024953	-2.90961	0
Bra015048	0	-2.84921
Bra038734	0	-2.83406
Bra033570	0	-2.80361
Bra012251	-2.75204	0
Bra035150	-2.70465	0
Bra000170	-2.70051	0
Bra010922	-2.68262	0
Bra032613	-2.66138	0
Bra032474	-2.61237	0
Bra027359	-2.6033	0
Bra026711	-2.52116	0
Bra019162	-2.51408	0
Bra036278	-2.49317	0
Bra018216	0	-2.47306
Bra034845	-2.45719	0
Bra037845	-2.45345	0
Bra028759	0	-2.36305
Bra031180	0	-2.34881
Bra038281	-2.33328	0
Bra029258	-2.333	0
Bra001885	0	-2.30077
Bra022722	-2.2994	0
Bra009229	-2.29491	0
Bra029889	0	-2.26849
Bra027083	-2.2298	0
Bra001320	-2.21194	0
Bra014430	-2.20482	0
Bra035732	0	-2.19088
Bra015733	0	-2.18346
Bra026317	0	-2.16347
Bra018964	0	-2.1468
Bra018850	-2.08524	0
Bra029309	0	2.07297
Bra026937	0	2.07484
Bra011891	2.0934	0
Bra025832	2.10451	0
Bra039693	2.12154	0
Bra031349	2.18045	0
Bra026230	2.25682	0
Bra006749	2.31478	0
Bra022161	2.39904	0
Bra031663	2.52931	0
Bra006195	2.57512	0
Bra020865	0	3.09006
Bra017351	3.10252	0
Bra031210	3.15573	0
Bra000775	3.59572	0
Bra007315	3.91011	0
Bra010441	2.06747	2.06747
Bra006567	4.2334	0
Bra010292	2.14932	2.14932
Bra000876	4.31664	0
Bra034595	4.66053	0
Bra018065	4.9916	0
Bra026124	2.83779	2.83779
Bra033648	5.79749	0

## Sheet: Sheet10
Gene_ID	Temp.	Photosyn.	Light	Gibberelllin	Water depri.	Heat	Ethylene	ABA	Circadian	Glucosinolate	Salicylic	Jasmonate	Cold	defense	Cell stress	Oxidative	salt stress	osmoticstress
Bra037845	-2.45345	0	0	0	0	0	0	-2.45345	0	0	0	0	-2.45345	0	0	0	-2.45345	-2.45345
Bra029258	-2.333	0	0	0	-2.333	0	0	-2.333	0	0	-2.333	0	-2.333	-2.333	0	0	-2.333	-2.333
Bra029292	-4.13052	0	0	0	0	-4.13052	0	0	0	0	0	0	0	0	-4.13052	0	0	0
Bra029301	-2.14694	0	0	0	0	0	0	0	0	0	0	0	0	-2.14694	0	0	0	0
Bra029309	2.07297	0	0	0	0	2.07297	0	0	0	0	0	0	0	0	2.07297	0	2.07297	2.07297
Bra006692	-2.46053	0	-2.46053	0	0	-2.46053	0	0	0	0	0	0	-2.46053	0	-2.46053	-2.46053	-2.46053	-2.46053
Bra006749	2.31478	0	0	0	2.31478	0	0	2.31478	0	0	0	0	2.31478	0	0	0	2.31478	2.31478
Bra010292	2.14932	0	0	0	0	2.14932	0	0	0	0	0	0	2.14932	0	2.14932	0	0	0
Bra022722	-2.2994	0	0	0	0	0	0	0	0	0	0	0	-2.2994	0	-2.2994	0	0	0
Bra035732	-2.19088	0	0	0	0	-2.19088	-2.19088	0	0	0	0	0	0	0	0	0	0	0
Bra037477	-3.06229	0	0	0	0	-3.06229	0	0	0	0	0	0	0	0	-3.06229	0	0	0
Bra024953	-2.90961	0	0	0	0	0	-2.90961	0	0	0	0	0	-2.90961	-2.90961	0	0	0	0
Bra033648	5.79749	0	5.79749	0	0	0	0	5.79749	5.79749	0	0	0	5.79749	0	0	0	0	0
Bra025439	-2.82935	0	-2.82935	0	0	-2.82935	0	-2.82935	0	0	0	0	-2.82935	-2.82935	0	-2.82935	0	0
Bra006567	4.2334	0	0	0	0	0	0	0	0	0	0	0	4.2334	0	0	0	0	0
Bra002283	-3.7908	0	-3.7908	0	0	0	0	0	0	0	0	0	-3.7908	0	-3.7908	-3.7908	0	0
Bra006195	2.57512	0	0	0	2.57512	0	2.57512	2.57512	0	2.57512	2.57512	2.57512	2.57512	0	2.57512	0	2.57512	2.57512
Bra008920	-3.25852	0	0	0	0	-3.25852	0	0	0	0	0	0	0	0	-3.25852	-3.25852	-3.25852	-3.25852
Bra028759	-2.36305	0	-2.36305	0	-2.36305	-2.36305	0	0	0	0	0	0	0	0	-2.36305	-2.36305	0	0
Bra011891	2.0934	0	0	0	0	0	0	0	0	0	0	0	2.0934	0	0	0	0	0
Bra033570	-2.80361	0	0	0	0	-2.80361	0	0	0	0	0	0	0	0	0	0	0	0
Bra017839	-3.48029	0	0	0	0	0	0	0	0	0	-3.48029	0	-3.48029	0	0	-3.48029	0	0
Bra009229	-2.29491	0	0	0	0	0	0	-2.29491	0	0	0	-2.29491	-2.29491	0	0	-2.29491	-2.29491	-2.29491
Bra017628	-3.42827	0	0	0	0	0	0	0	0	0	0	0	-3.42827	0	-3.42827	0	0	0
Bra034595	4.66053	0	4.66053	0	0	0	0	4.66053	4.66053	0	0	0	4.66053	0	0	0	0	0
Bra026317	-2.16347	0	-2.16347	0	0	-2.16347	0	0	0	0	0	0	0	0	0	-2.16347	0	0
Bra010441	2.06747	0	0	0	0	2.06747	0	2.06747	0	0	0	0	2.06747	0	0	0	0	0
Bra019162	-2.51408	0	0	0	0	0	0	0	0	0	0	0	-2.51408	0	0	0	0	0
Bra020865	3.09006	0	0	0	0	3.09006	0	0	0	0	0	0	0	0	0	3.09006	3.09006	3.09006
Bra040169	-4.44398	0	0	0	-4.44398	0	0	-4.44398	0	0	0	0	-4.44398	0	0	0	-4.44398	-4.44398
Bra026230	2.25682	0	0	0	0	0	0	0	0	0	0	0	2.25682	0	0	0	0	0
Bra000775	3.59572	0	0	0	0	0	0	3.59572	0	0	0	0	3.59572	3.59572	0	0	3.59572	3.59572
Bra018477	-3.13477	0	-3.13477	0	0	-3.13477	0	0	0	0	0	0	0	0	0	-3.13477	0	0
Bra039693	2.12154	0	0	0	0	0	0	0	0	0	0	0	2.12154	2.12154	2.12154	0	2.12154	2.12154
Bra000876	4.31664	0	0	0	0	0	0	0	0	0	0	0	4.31664	4.31664	0	0	4.31664	4.31664
Bra036278	-2.49317	0	0	0	0	0	0	0	0	0	0	0	-2.49317	0	0	0	0	0
Bra014430	-2.20482	0	0	0	0	0	0	0	0	0	0	0	-2.20482	0	-2.20482	0	0	0
Bra007315	3.91011	0	0	0	0	0	0	0	0	0	0	0	3.91011	3.91011	0	0	0	0
Bra007205	-3.40209	0	0	0	0	0	0	0	0	0	0	0	-3.40209	-3.40209	-3.40209	0	0	0
Bra007177	-5.94674	0	0	0	0	0	0	0	0	0	0	0	-5.94674	0	-5.94674	0	0	0
Bra012828	-3.62574	0	-3.62574	0	0	-3.62574	0	0	0	0	0	0	0	0	-3.62574	0	0	0
Bra019599	-3.10933	0	0	0	0	0	0	0	0	0	0	0	-3.10933	-3.10933	-3.10933	0	0	0
Bra018065	4.9916	0	0	0	0	0	0	4.9916	4.9916	0	4.9916	4.9916	4.9916	0	0	4.9916	4.9916	4.9916
Bra038281	-2.33328	0	-2.33328	0	-2.33328	0	0	-2.33328	0	0	0	0	-2.33328	-2.33328	-2.33328	-2.33328	-2.33328	-2.33328
Bra025297	-5.0703	-5.0703	-5.0703	0	-5.0703	0	0	-5.0703	0	0	0	0	-5.0703	0	0	0	0	0
Bra017351	3.10252	0	0	0	0	0	0	0	0	0	0	0	3.10252	0	0	0	0	0
Bra015048	-2.84921	0	0	0	-2.84921	-2.84921	-2.84921	-2.84921	0	0	0	0	0	0	-2.84921	0	0	0
Bra001907	-3.59904	0	0	0	-3.59904	0	-3.59904	0	0	0	0	-3.59904	-3.59904	0	0	0	-3.59904	-3.59904
Bra001885	-2.30077	0	0	0	0	-2.30077	0	0	0	0	0	0	0	0	-2.30077	0	0	0
Bra031349	2.18045	0	0	0	2.18045	0	0	0	0	0	0	0	2.18045	0	0	0	2.18045	2.18045
Bra022161	2.39904	0	0	0	0	0	0	0	0	0	0	2.39904	2.39904	0	0	0	2.39904	2.39904
Bra027359	-2.6033	0	0	0	0	0	0	0	0	-2.6033	0	0	-2.6033	-2.6033	0	0	0	0
Bra038734	-2.83406	0	-2.83406	0	0	-2.83406	0	0	0	0	0	0	0	0	-2.83406	-2.83406	0	0
Bra034845	-2.45719	0	0	0	-2.45719	0	0	-2.45719	0	0	0	0	-2.45719	0	0	0	0	0
Bra029889	-2.26849	0	0	0	0	-2.26849	0	0	0	0	0	0	0	0	0	0	0	0
Bra001320	-2.21194	0	0	0	0	0	0	0	0	-2.21194	0	0	-2.21194	-2.21194	-2.21194	0	-2.21194	-2.21194
Bra029712	-2.6051	0	0	0	0	-2.6051	0	0	0	0	0	0	-2.6051	0	-2.6051	0	-2.6051	-2.6051
Bra004503	-4.70998	0	-4.70998	-4.70998	0	0	-4.70998	-4.70998	-4.70998	0	-4.70998	-4.70998	-4.70998	0	0	0	-4.70998	-4.70998
Bra014527	-3.63281	0	-3.63281	0	0	0	-3.63281	-3.63281	0	0	0	-3.63281	-3.63281	-3.63281	-3.63281	-3.63281	-3.63281	-3.63281
Bra000170	-2.70051	0	0	0	0	0	0	0	0	0	0	0	-2.70051	-2.70051	-2.70051	0	0	0
Bra018383	-3.16391	0	-3.16391	0	0	-3.16391	0	0	0	0	0	0	0	0	0	-3.16391	-3.16391	-3.16391
Bra000557	-4.23182	0	-4.23182	0	0	-4.23182	0	0	0	0	0	0	0	0	-4.23182	-4.23182	0	0
Bra038538	-3.48934	0	-3.48934	0	0	-3.48934	0	0	0	0	0	0	0	-3.48934	-3.48934	-3.48934	0	0
Bra031210	3.15573	0	0	0	3.15573	0	0	0	3.15573	0	0	0	3.15573	3.15573	0	0	3.15573	3.15573
Bra031180	-2.34881	0	-2.34881	0	0	-2.34881	0	0	0	0	0	0	0	0	-2.34881	0	0	0
Bra033022	-3.45059	-3.45059	-3.45059	0	-3.45059	0	0	-3.45059	0	0	0	0	-3.45059	0	0	0	0	0
Bra035150	-2.70465	0	0	0	0	0	0	0	-2.70465	0	0	0	-2.70465	-2.70465	0	0	0	0
Bra015733	-2.18346	0	0	0	0	-2.18346	0	0	0	0	0	0	0	0	-2.18346	0	0	0
Bra015922	-4.3701	0	-4.3701	0	0	-4.3701	0	0	0	0	0	0	0	0	-4.3701	-4.3701	0	0
Bra027083	-2.2298	-2.2298	-2.2298	0	0	0	0	0	0	0	0	0	-2.2298	0	0	0	0	0
Bra012949	-5.25722	0	-5.25722	0	0	-5.25722	0	0	0	0	0	0	0	0	-5.25722	-5.25722	-5.25722	-5.25722
Bra018216	-2.47306	0	0	0	0	-2.47306	0	0	0	0	0	0	0	0	0	-2.47306	-2.47306	-2.47306
Bra018964	-2.1468	0	0	0	-2.1468	-2.1468	0	0	0	0	0	0	0	0	0	0	0	0
Bra018850	-2.08524	0	0	0	0	0	0	0	0	0	0	0	-2.08524	0	0	0	-2.08524	-2.08524
Bra010922	-2.68262	0	-2.68262	0	-2.68262	0	0	-2.68262	0	0	0	0	-2.68262	0	-2.68262	-2.68262	-2.68262	-2.68262
Bra036022	-2.70172	0	0	0	0	-2.70172	-2.70172	0	0	0	-2.70172	-2.70172	-2.70172	0	-2.70172	0	0	0
Bra012251	-2.75204	0	0	0	0	0	0	0	0	0	0	0	-2.75204	-2.75204	-2.75204	0	0	0
Bra025832	2.10451	0	2.10451	0	0	0	0	0	0	0	0	0	2.10451	0	2.10451	2.10451	0	0
Bra031048	-3.61057	0	0	0	0	0	0	0	0	0	0	0	-3.61057	0	0	0	0	0
Bra026711	-2.52116	0	0	0	0	0	0	0	0	0	0	0	-2.52116	0	0	0	0	0
Bra026084	-3.0157	0	0	0	0	-3.0157	0	0	0	0	0	0	0	0	-3.0157	0	0	0
Bra026124	2.83779	0	0	0	2.83779	2.83779	2.83779	2.83779	0	0	2.83779	2.83779	2.83779	2.83779	2.83779	2.83779	0	0
Bra026937	2.07484	0	0	0	0	2.07484	0	0	0	0	0	0	0	0	0	0	0	0
Bra016763	-6.06985	0	0	0	-6.06985	-6.06985	0	0	0	-6.06985	0	0	-6.06985	0	0	0	0	0
Bra031663	2.52931	0	0	0	0	0	0	0	0	0	0	0	2.52931	0	0	2.52931	0	0
Bra031657	-3.5257	0	0	0	0	-3.5257	0	0	0	0	0	0	0	0	-3.5257	0	0	0
Bra032474	-2.61237	0	0	0	-2.61237	0	0	0	0	0	0	0	-2.61237	0	0	-2.61237	-2.61237	-2.61237
Bra032613	-2.66138	0	0	0	0	0	0	0	0	0	0	0	-2.66138	0	0	0	0	0
Bra032622	-3.14596	0	0	0	0	0	0	0	0	0	0	0	-3.14596	0	-3.14596	0	-3.14596	-3.14596
Bra030496	-4.80101	0	-4.80101	-4.80101	0	0	-4.80101	-4.80101	-4.80101	0	-4.80101	-4.80101	-4.80101	0	0	0	-4.80101	-4.80101
Bra002999	0	-3.19806	-3.19806	0	0	0	0	-3.19806	0	0	0	0	0	0	0	0	0	0
Bra000708	0	-2.05672	-2.05672	0	0	0	0	0	0	0	0	0	0	0	0	0	0	0
Bra005424	0	-2.78445	-2.78445	0	0	0	0	0	0	0	0	0	0	0	0	0	0	0
Bra008216	0	-2.445	0	0	0	0	0	0	0	0	0	0	0	0	0	0	0	0
Bra030182	0	-2.60892	-2.60892	0	0	0	0	0	0	0	0	0	0	0	0	0	0	0
Bra010807	0	-2.106	-2.106	0	0	0	0	0	0	0	0	0	0	0	0	0	0	0
Bra026099	0	-2.02632	-2.02632	0	0	0	0	0	0	0	0	0	0	0	0	0	0	0
Bra024339	0	0	-2.04062	0	0	0	0	0	-2.04062	0	0	0	0	0	-2.04062	-2.04062	0	0
Bra012972	0	0	-2.70884	0	0	0	0	0	0	0	0	0	0	0	0	0	0	0
Bra019118	0	0	3.32227	3.32227	0	0	0	0	3.32227	0	0	0	0	0	0	0	0	0
Bra021965	0	0	-5.24685	0	-5.24685	0	0	0	0	0	0	0	0	0	-5.24685	0	0	0
Bra009735	0	0	-2.85758	0	0	0	0	0	0	0	0	0	0	0	-2.85758	0	-2.85758	-2.85758
Bra026485	0	0	-2.84234	0	0	0	0	0	0	0	0	0	0	0	0	0	0	0
Bra023317	0	0	-2.02839	-2.02839	0	0	0	-2.02839	-2.02839	0	0	0	0	0	0	0	0	0
Bra006085	0	0	3.3144	0	0	0	0	0	0	0	0	0	0	0	0	0	0	0
Bra037747	0	0	-2.64858	0	0	0	0	0	0	0	0	0	0	0	0	0	0	0
Bra005709	0	0	-2.06584	0	0	0	0	0	-2.06584	0	0	0	0	0	0	0	0	0
Bra010713	0	0	4.30981	0	0	0	0	0	0	0	0	0	0	0	0	0	0	0
Bra033588	0	0	-2.16198	0	0	0	0	0	-2.16198	0	0	0	0	0	0	0	0	0
Bra039194	0	0	3.14088	0	0	0	0	0	0	0	0	0	0	0	0	0	0	0
Bra011332	0	0	2.04377	0	0	0	0	0	0	0	0	0	0	0	0	0	0	0
Bra034941	0	0	2.08507	0	0	0	0	0	0	2.08507	0	0	0	2.08507	2.08507	0	0	0
Bra019058	0	0	-3.17663	0	0	0	0	0	0	0	0	0	0	0	0	0	0	0
Bra026461	0	0	2.5276	2.5276	0	0	0	0	2.5276	0	0	0	0	0	0	0	0	0
Bra040158	0	0	-3.27001	0	0	0	-3.27001	0	0	0	0	0	0	-3.27001	0	-3.27001	0	0
Bra012784	0	0	-5.60002	0	0	0	0	0	0	0	0	0	0	0	0	0	0	0
Bra014674	0	0	-2.22396	0	0	0	0	0	0	0	0	0	0	-2.22396	0	0	0	0
Bra019466	0	0	-2.25728	0	0	0	0	0	0	0	0	0	0	0	0	0	0	0
Bra023857	0	0	-3.40103	0	0	0	0	0	-3.40103	0	0	0	0	0	0	0	0	0
Bra031255	0	0	-4.12096	0	0	0	0	0	0	0	0	0	0	0	0	0	0	0
Bra001761	0	0	3.24396	0	0	0	0	0	0	3.24396	0	0	0	0	0	0	0	0
Bra021259	0	0	-2.95115	0	0	0	0	0	0	0	0	0	0	0	-2.95115	0	0	0
Bra022225	0	0	-3.66639	0	0	0	0	0	0	0	0	0	0	0	0	0	0	0
Bra022191	0	0	-2.72452	0	0	0	0	0	0	0	0	0	0	0	0	0	0	0
Bra029778	0	0	-3.45677	-3.45677	0	0	-3.45677	-3.45677	-3.45677	0	-3.45677	-3.45677	0	0	0	0	-3.45677	-3.45677
Bra001264	0	0	5.74276	0	0	0	0	0	5.74276	0	0	0	0	0	0	0	0	0
Bra004507	0	0	-3.88147	0	0	0	0	0	-3.88147	0	0	0	0	0	0	0	0	0
Bra039338	0	0	-2.11198	0	0	0	0	0	0	0	0	0	0	0	0	0	0	0
Bra004718	0	0	3.44241	0	0	0	0	0	0	0	0	0	0	0	0	0	0	0
Bra016886	0	0	2.68306	0	0	0	0	0	0	0	0	0	0	0	0	0	0	0
Bra017035	0	0	6.91239	0	0	0	0	0	6.91239	0	0	0	0	0	0	0	0	0
Bra017218	0	0	2.0415	2.0415	0	0	0	2.0415	0	0	2.0415	2.0415	0	0	0	0	0	0
Bra018249	0	0	-3.05805	0	0	0	0	0	0	0	0	0	0	0	0	0	0	0
Bra022805	0	0	-3.00126	0	0	0	0	0	0	0	0	0	0	0	0	0	0	0
Bra031619	0	0	2.50452	0	0	0	0	0	0	0	0	0	0	0	0	0	0	0
Bra007843	0	0	-2.05169	0	0	0	0	0	0	0	0	0	0	0	0	0	0	0
Bra039937	0	0	-2.29305	0	0	0	0	0	0	0	0	0	0	0	0	0	0	0
Bra038832	0	0	3.73241	0	0	0	0	0	3.73241	0	0	0	0	0	0	0	0	0
Bra026572	0	0	2.51493	0	0	0	0	0	0	0	0	0	0	0	0	0	0	0
Bra024900	0	0	-4.05021	0	0	0	0	0	0	0	0	0	0	-4.05021	-4.05021	0	0	0
Bra016635	0	0	3.25939	0	0	0	0	0	0	0	0	0	0	0	0	0	0	0
Bra003670	0	0	-3.6863	0	0	0	0	0	0	0	0	0	0	0	0	0	0	0
Bra015866	0	0	-2.03766	0	0	0	0	0	0	0	0	0	0	0	0	0	0	0
Bra016230	0	0	-3.32419	0	0	0	0	0	0	0	0	-3.32419	0	0	0	0	-3.32419	-3.32419
Bra007864	0	0	2.92623	2.92623	0	0	0	0	0	0	0	0	0	0	0	0	0	0
Bra019711	0	0	-2.89085	0	0	0	0	0	0	0	-2.89085	0	0	-2.89085	0	0	0	0
Bra018907	0	0	-2.35787	0	0	0	0	0	0	0	0	0	0	0	0	-2.35787	0	0
Bra034424	0	0	-2.79607	0	0	0	0	0	0	0	0	0	0	0	0	0	0	0
Bra012299	0	0	2.43986	0	0	0	0	0	0	0	0	0	0	0	0	0	0	0
Bra026991	0	0	3.13716	0	3.13716	0	0	0	0	0	0	0	0	0	0	0	0	0
Bra033324	0	0	-4.35391	0	0	0	0	0	0	0	0	0	0	0	0	0	0	0
Bra029990	0	0	0	-4.248	-4.248	0	-4.248	-4.248	0	0	-4.248	-4.248	0	-4.248	0	0	-4.248	-4.248
Bra029311	0	0	0	3.0232	0	0	0	0	0	3.0232	3.0232	3.0232	0	3.0232	3.0232	0	0	0
Bra006694	0	0	0	2.83967	0	0	2.83967	0	0	0	2.83967	2.83967	0	0	0	0	0	0
Bra036183	0	0	0	-2.23092	0	0	0	0	0	0	0	0	0	0	0	0	0	0
Bra023515	0	0	0	2.13565	0	0	2.13565	0	0	0	2.13565	2.13565	0	0	0	0	2.13565	2.13565
Bra028724	0	0	0	2.61838	0	0	0	0	0	0	0	0	0	0	0	0	0	0
Bra005751	0	0	0	-3.2615	0	0	-3.2615	-3.2615	-3.2615	0	-3.2615	-3.2615	0	0	0	0	-3.2615	-3.2615
Bra017759	0	0	0	2.83117	0	0	0	0	0	0	0	0	0	0	0	0	0	0
Bra012532	0	0	0	4.68708	0	0	0	0	0	0	0	0	0	4.68708	0	0	0	0
Bra007378	0	0	0	2.58764	0	0	0	0	0	0	0	0	0	0	0	0	0	0
Bra004946	0	0	0	2.35462	0	0	0	0	0	0	0	0	0	0	0	0	0	0
Bra016900	0	0	0	2.85219	0	0	0	2.85219	0	0	0	0	0	0	0	0	0	0
Bra021903	0	0	0	2.63438	0	0	0	0	0	0	0	0	0	0	0	0	0	0
Bra016164	0	0	0	-2.83053	0	0	-2.83053	-2.83053	0	0	-2.83053	-2.83053	0	0	0	0	-2.83053	-2.83053
Bra003969	0	0	0	-3.79585	0	0	-3.79585	-3.79585	0	0	-3.79585	-3.79585	0	0	0	0	-3.79585	-3.79585
Bra036653	0	0	0	-3.02422	-3.02422	0	0	-3.02422	0	0	0	0	0	0	0	0	-3.02422	-3.02422
Bra006709	0	0	0	0	-2.82466	0	0	-2.82466	0	0	0	0	0	0	0	0	0	0
Bra002594	0	0	0	0	-2.02549	0	0	-2.02549	0	0	0	0	0	0	0	0	0	0
Bra029145	0	0	0	0	-3.34134	0	0	-3.34134	0	0	0	0	0	0	0	0	0	0
Bra013009	0	0	0	0	2.68023	0	0	0	0	2.68023	0	0	0	0	0	0	0	0
Bra026353	0	0	0	0	-2.36717	0	0	-2.36717	0	0	0	0	0	0	0	0	0	0
Bra005351	0	0	0	0	-2.88273	0	0	-2.88273	0	0	0	0	0	0	0	0	-2.88273	-2.88273
Bra007637	0	0	0	0	-2.92031	0	0	-2.92031	0	0	0	0	0	0	0	0	0	-2.92031
Bra007603	0	0	0	0	-3.2367	0	0	0	0	0	0	0	0	0	0	0	0	0
Bra014666	0	0	0	0	-2.45982	0	0	0	0	0	0	0	0	0	-2.45982	0	-2.45982	-2.45982
Bra006997	0	0	0	0	-2.09094	0	0	-2.09094	0	0	0	0	0	0	0	0	0	0
Bra012803	0	0	0	0	-2.4581	0	0	0	0	0	0	0	0	-2.4581	0	0	0	0
Bra018183	0	0	0	0	-2.62535	0	0	-2.62535	0	0	0	0	0	0	0	-2.62535	-2.62535	-2.62535
Bra015025	0	0	0	0	-2.36115	0	0	0	0	0	0	0	0	0	0	0	0	0
Bra001752	0	0	0	0	-4.12117	0	0	-4.12117	0	0	0	0	0	0	0	0	-4.12117	-4.12117
Bra022179	0	0	0	0	-2.23448	0	0	0	0	0	0	0	0	0	0	0	0	0
Bra021113	0	0	0	0	2.38795	0	0	0	0	0	0	2.38795	0	0	0	0	0	0
Bra021558	0	0	0	0	-3.23576	0	0	0	0	0	0	0	0	0	0	0	-3.23576	-3.23576
Bra014426	0	0	0	0	-2.67258	0	0	0	0	0	-2.67258	-2.67258	0	-2.67258	-2.67258	0	0	0
Bra000203	0	0	0	0	4.53342	0	4.53342	0	0	0	4.53342	4.53342	0	4.53342	0	4.53342	0	4.53342
Bra023103	0	0	0	0	-2.48648	0	0	-2.48648	0	0	0	0	0	0	0	0	0	0
Bra017278	0	0	0	0	-2.75242	0	0	0	0	0	0	0	0	-2.75242	0	0	0	0
Bra036901	0	0	0	0	2.01241	0	0	2.01241	0	0	0	0	0	0	2.01241	0	0	0
Bra023278	0	0	0	0	-3.0184	0	0	0	0	0	0	0	0	0	0	0	0	-3.0184
Bra024539	0	0	0	0	-4.34445	0	-4.34445	0	0	0	0	0	0	0	-4.34445	0	0	0
Bra026062	0	0	0	0	2.19699	0	0	0	0	0	0	0	0	0	2.19699	0	2.19699	2.19699
Bra031903	0	0	0	0	0	0	2.72632	2.72632	0	0	0	0	0	2.72632	0	0	0	2.72632
Bra029302	0	0	0	0	0	0	2.25427	0	0	0	0	0	0	2.25427	0	0	0	0
Bra028291	0	0	0	0	0	0	-5.21386	0	0	-5.21386	0	0	0	-5.21386	0	0	0	0
Bra006599	0	0	0	0	0	0	-4.10502	0	0	0	0	0	0	0	0	0	0	0
Bra008952	0	0	0	0	0	0	-2.33969	0	0	0	0	0	0	0	0	0	0	0
Bra009250	0	0	0	0	0	0	4.27494	0	0	0	0	0	0	0	0	0	0	0
Bra011833	0	0	0	0	0	0	2.18359	0	0	0	0	0	0	0	0	0	0	0
Bra011749	0	0	0	0	0	0	-2.59879	-2.59879	0	-2.59879	-2.59879	-2.59879	0	0	0	0	-2.59879	-2.59879
Bra017656	0	0	0	0	0	0	-6.20964	0	0	0	0	0	0	-6.20964	0	0	0	0
Bra011383	0	0	0	0	0	0	-2.87256	0	0	0	0	0	0	0	0	0	0	0
Bra012910	0	0	0	0	0	0	-3.99209	0	0	0	-3.99209	0	0	0	0	0	0	0
Bra013226	0	0	0	0	0	0	-2.14112	0	0	0	0	0	0	0	-2.14112	-2.14112	0	0
Bra023756	0	0	0	0	0	0	2.39781	0	0	0	0	0	0	0	2.39781	0	0	0
Bra030957	0	0	0	0	0	0	-3.50557	-3.50557	0	0	0	-3.50557	0	-3.50557	-3.50557	0	0	0
Bra001122	0	0	0	0	0	0	4.72944	0	0	0	0	0	0	4.72944	0	0	4.72944	4.72944
Bra037630	0	0	0	0	0	0	-4.61055	0	0	0	0	0	0	-4.61055	0	0	0	0
Bra004449	0	0	0	0	0	0	2.19697	0	0	0	0	0	0	0	0	0	0	0
Bra021712	0	0	0	0	0	0	3.31568	0	0	0	0	0	0	3.31568	0	0	0	0
Bra013123	0	0	0	0	0	0	3.41072	0	0	0	3.41072	3.41072	0	3.41072	0	0	0	0
Bra015882	0	0	0	0	0	0	-3.30023	0	0	0	0	0	0	-3.30023	0	0	0	0
Bra008032	0	0	0	0	0	0	-2.4744	0	0	0	0	0	0	0	-2.4744	0	0	0
Bra003883	0	0	0	0	0	0	2.53113	0	0	0	0	0	0	0	2.53113	0	0	0
Bra016136	0	0	0	0	0	0	-5.72598	0	0	0	0	0	0	0	0	0	0	0
Bra027736	0	0	0	0	0	0	-2.44745	0	0	0	0	0	0	0	0	0	0	0
Bra010210	0	0	0	0	0	0	-4.02874	0	0	0	0	0	0	0	0	0	0	0
Bra032901	0	0	0	0	0	0	-5.32533	0	0	0	0	0	0	0	0	0	0	0
Bra010881	0	0	0	0	0	0	-3.22061	0	0	0	0	0	0	-3.22061	0	0	0	0
Bra031069	0	0	0	0	0	0	-6.05413	0	0	0	0	0	0	0	0	0	0	0
Bra016518	0	0	0	0	0	0	-4.93862	0	0	0	0	0	0	0	0	0	0	0
Bra025914	0	0	0	0	0	0	-2.14724	0	-2.14724	0	0	0	0	0	0	0	-2.14724	-2.14724
Bra031798	0	0	0	0	0	0	3.69542	0	0	0	0	0	0	3.69542	3.69542	3.69542	3.69542	3.69542
Bra029093	0	0	0	0	0	0	0	2.3093	0	0	0	0	0	0	0	0	0	0
Bra028290	0	0	0	0	0	0	0	-6.13537	0	-6.13537	0	0	0	0	0	0	0	0
Bra025012	0	0	0	0	0	0	0	4.33605	0	0	0	0	0	0	0	0	0	0
Bra009294	0	0	0	0	0	0	0	-4.23529	0	0	0	0	0	0	0	0	0	0
Bra023576	0	0	0	0	0	0	0	-2.01062	0	0	0	0	0	0	0	0	0	0
Bra023398	0	0	0	0	0	0	0	-2.25029	0	0	0	0	0	0	0	0	0	0
Bra008850	0	0	0	0	0	0	0	2.37544	0	0	2.37544	0	0	0	2.37544	0	0	2.37544
Bra006862	0	0	0	0	0	0	0	-2.44457	0	0	0	0	0	-2.44457	0	0	0	0
Bra025280	0	0	0	0	0	0	0	-2.44465	0	0	0	0	0	0	0	0	-2.44465	-2.44465
Bra013714	0	0	0	0	0	0	0	2.77657	0	0	0	2.77657	0	0	0	0	2.77657	2.77657
Bra013426	0	0	0	0	0	0	0	3.36947	0	0	0	3.36947	0	0	0	0	3.36947	3.36947
Bra029496	0	0	0	0	0	0	0	3.3589	0	0	0	0	0	0	0	0	0	0
Bra007334	0	0	0	0	0	0	0	-4.89487	0	0	0	0	0	0	0	0	-4.89487	-4.89487
Bra006975	0	0	0	0	0	0	0	2.32218	0	0	0	0	0	0	0	0	0	0
Bra025400	0	0	0	0	0	0	0	-2.50962	0	0	0	0	0	0	0	0	0	0
Bra036353	0	0	0	0	0	0	0	-2.07191	0	0	0	0	0	0	0	0	0	0
Bra001789	0	0	0	0	0	0	0	-2.31436	0	0	0	0	0	0	0	0	0	0
Bra006218	0	0	0	0	0	0	0	-2.04536	0	0	0	0	0	0	0	0	0	0
Bra001422	0	0	0	0	0	0	0	-3.09588	0	0	0	0	0	-3.09588	0	0	0	0
Bra031431	0	0	0	0	0	0	0	2.02228	0	0	0	0	0	0	0	0	0	0
Bra004748	0	0	0	0	0	0	0	2.3761	0	0	0	0	0	0	0	0	0	0
Bra005071	0	0	0	0	0	0	0	4.2581	0	0	0	0	0	0	0	0	0	0
Bra022772	0	0	0	0	0	0	0	-3.64997	0	0	0	0	0	-3.64997	0	0	0	0
Bra004004	0	0	0	0	0	0	0	-2.20745	0	0	0	0	0	0	0	0	0	0
Bra004330	0	0	0	0	0	0	0	-3.62253	0	0	0	0	0	0	-3.62253	0	0	0
Bra027664	0	0	0	0	0	0	0	-2.56554	0	0	0	0	0	0	0	0	0	0
Bra031435	0	0	0	0	0	0	0	-2.91021	0	0	-2.91021	-2.91021	0	0	-2.91021	0	-2.91021	-2.91021
Bra039700	0	0	0	0	0	0	0	-2.20253	0	0	0	0	0	0	0	0	0	0
Bra033239	0	0	0	0	0	0	0	-2.54767	0	0	0	0	0	0	-2.54767	0	0	0
Bra012964	0	0	0	0	0	0	0	0	2.67773	0	0	0	0	0	0	0	0	0
Bra033809	0	0	0	0	0	0	0	0	3.67006	0	0	0	0	0	0	0	0	0
Bra023610	0	0	0	0	0	0	0	0	-3.02225	0	0	0	0	0	0	0	0	0
Bra005984	0	0	0	0	0	0	0	0	-2.32912	0	0	0	0	0	0	0	0	0
Bra009302	0	0	0	0	0	0	0	0	-2.9048	0	0	0	0	0	0	0	0	0
Bra007099	0	0	0	0	0	0	0	0	-3.13731	0	0	0	0	0	0	0	0	0
Bra003187	0	0	0	0	0	0	0	0	-2.71697	0	0	0	0	0	0	0	0	0
Bra018204	0	0	0	0	0	0	0	0	4.96642	0	0	0	0	0	0	0	0	0
Bra035742	0	0	0	0	0	0	0	0	7.07217	0	0	0	0	0	0	0	0	0
Bra027323	0	0	0	0	0	0	0	0	4.26212	0	0	0	0	0	0	0	0	0
Bra034762	0	0	0	0	0	0	0	0	-4.9707	0	0	0	0	0	0	0	0	0
Bra021480	0	0	0	0	0	0	0	0	-2.2659	0	0	0	0	0	0	0	0	0
Bra035954	0	0	0	0	0	0	0	0	0	-2.93833	0	-2.93833	0	-2.93833	-2.93833	0	0	0
Bra022302	0	0	0	0	0	0	0	0	0	2.18791	0	0	0	0	0	0	0	0
Bra037456	0	0	0	0	0	0	0	0	0	-2.42311	0	0	0	0	-2.42311	0	0	0
Bra039495	0	0	0	0	0	0	0	0	0	2.30022	0	0	0	0	0	0	0	0
Bra023450	0	0	0	0	0	0	0	0	0	2.70823	0	2.70823	0	0	0	0	2.70823	2.70823
Bra011757	0	0	0	0	0	0	0	0	0	-2.04304	0	0	0	0	0	0	0	0
Bra032734	0	0	0	0	0	0	0	0	0	2.73574	0	0	0	0	0	0	0	0
Bra000760	0	0	0	0	0	0	0	0	0	3.22865	0	3.22865	0	0	0	0	0	0
Bra004840	0	0	0	0	0	0	0	0	0	6.71069	0	0	0	0	0	0	6.71069	6.71069
Bra039038	0	0	0	0	0	0	0	0	0	-3.09155	0	0	0	0	0	0	0	0
Bra013227	0	0	0	0	0	0	0	0	0	-2.43895	0	0	0	-2.43895	0	0	0	0
Bra021175	0	0	0	0	0	0	0	0	0	-2.34857	0	0	0	0	0	0	0	0
Bra001411	0	0	0	0	0	0	0	0	0	2.30281	0	0	0	0	0	0	0	0
Bra021672	0	0	0	0	0	0	0	0	0	2.23962	0	0	0	0	0	0	0	0
Bra015935	0	0	0	0	0	0	0	0	0	2.20475	0	2.20475	0	2.20475	0	0	0	0
Bra015938	0	0	0	0	0	0	0	0	0	2.58615	0	0	0	0	0	0	0	0
Bra012409	0	0	0	0	0	0	0	0	0	-2.14639	0	0	0	-2.14639	0	0	0	0
Bra016432	0	0	0	0	0	0	0	0	0	3.10014	0	0	0	0	0	0	0	0
Bra012270	0	0	0	0	0	0	0	0	0	2.33847	0	0	0	0	0	0	0	0
Bra025668	0	0	0	0	0	0	0	0	0	2.43194	0	0	0	0	0	0	0	0
Bra026058	0	0	0	0	0	0	0	0	0	3.0285	0	0	0	0	0	0	0	0
Bra030589	0	0	0	0	0	0	0	0	0	-3.55856	0	0	0	0	-3.55856	0	0	0
Bra038612	0	0	0	0	0	0	0	0	0	0	-2.13242	0	0	0	0	-2.13242	0	0
Bra020197	0	0	0	0	0	0	0	0	0	0	2.98463	0	0	2.98463	0	0	0	0
Bra006194	0	0	0	0	0	0	0	0	0	0	3.12442	0	0	3.12442	3.12442	0	0	0
Bra005891	0	0	0	0	0	0	0	0	0	0	-3.20365	0	0	-3.20365	-3.20365	0	0	0
Bra023211	0	0	0	0	0	0	0	0	0	0	2.74276	0	0	2.74276	0	0	0	0
Bra019324	0	0	0	0	0	0	0	0	0	0	2.89443	0	0	2.89443	0	0	0	0
Bra020821	0	0	0	0	0	0	0	0	0	0	2.82978	0	0	2.82978	0	0	0	0
Bra001549	0	0	0	0	0	0	0	0	0	0	2.92906	2.92906	0	2.92906	0	0	0	0
Bra004994	0	0	0	0	0	0	0	0	0	0	-4.75263	0	0	-4.75263	-4.75263	-4.75263	0	0
Bra022905	0	0	0	0	0	0	0	0	0	0	-3.31252	-3.31252	0	-3.31252	0	0	0	0
Bra013138	0	0	0	0	0	0	0	0	0	0	4.38917	0	0	4.38917	0	0	0	0
Bra017373	0	0	0	0	0	0	0	0	0	0	-3.79771	0	0	-3.79771	0	0	-3.79771	-3.79771
Bra003588	0	0	0	0	0	0	0	0	0	0	-4.51987	0	0	-4.51987	0	0	0	0
Bra003598	0	0	0	0	0	0	0	0	0	0	3.46075	0	0	3.46075	0	0	0	0
Bra015912	0	0	0	0	0	0	0	0	0	0	-2.41281	-2.41281	0	0	0	0	0	0
Bra016002	0	0	0	0	0	0	0	0	0	0	3.03309	0	0	3.03309	0	3.03309	3.03309	3.03309
Bra032911	0	0	0	0	0	0	0	0	0	0	-3.79739	-3.79739	0	0	0	0	0	0
Bra025884	0	0	0	0	0	0	0	0	0	0	3.25447	0	0	3.25447	0	0	0	0
Bra026104	0	0	0	0	0	0	0	0	0	0	3.04248	0	0	0	0	0	0	0
Bra019862	0	0	0	0	0	0	0	0	0	0	2.04603	0	0	2.04603	0	0	0	0
Bra015435	0	0	0	0	0	0	0	0	0	0	2.00665	0	0	0	0	0	0	0
Bra024328	0	0	0	0	0	0	0	0	0	0	0	2.03124	0	2.03124	0	0	0	0
Bra035641	0	0	0	0	0	0	0	0	0	0	0	-3.52701	0	-3.52701	0	0	0	0
Bra009300	0	0	0	0	0	0	0	0	0	0	0	3.33844	0	0	0	0	0	0
Bra028752	0	0	0	0	0	0	0	0	0	0	0	2.72881	0	0	0	0	0	0
Bra011636	0	0	0	0	0	0	0	0	0	0	0	-4.0791	0	0	0	-4.0791	0	0
Bra023998	0	0	0	0	0	0	0	0	0	0	0	-2.3913	0	-2.3913	0	0	0	0
Bra021082	0	0	0	0	0	0	0	0	0	0	0	2.98581	0	0	0	0	0	0
Bra035236	0	0	0	0	0	0	0	0	0	0	0	-3.0542	0	-3.0542	0	-3.0542	0	0
Bra004058	0	0	0	0	0	0	0	0	0	0	0	3.57838	0	0	0	0	0	0
Bra021114	0	0	0	0	0	0	0	0	0	0	0	2.05864	0	0	0	0	0	0
Bra017132	0	0	0	0	0	0	0	0	0	0	0	4.10151	0	0	0	0	0	0
Bra022981	0	0	0	0	0	0	0	0	0	0	0	-5.09672	0	-5.09672	0	0	0	0
Bra007828	0	0	0	0	0	0	0	0	0	0	0	2.05411	0	0	0	0	0	0
Bra031065	0	0	0	0	0	0	0	0	0	0	0	-3.48142	0	-3.48142	0	0	0	0
Bra032362	0	0	0	0	0	0	0	0	0	0	0	-2.86185	0	-2.86185	0	0	0	0
Bra025713	0	0	0	0	0	0	0	0	0	0	0	-2.21268	0	-2.21268	0	0	0	0
Bra025951	0	0	0	0	0	0	0	0	0	0	0	-3.90362	0	-3.90362	0	0	0	0
Bra037139	0	0	0	0	0	0	0	0	0	0	0	0	0	-2.1463	0	0	0	0
Bra012058	0	0	0	0	0	0	0	-3.54359	0	0	0	0	0	-3.54359	0	0	0	0
Bra009663	0	0	0	0	0	0	0	-3.44863	0	0	0	0	0	-3.44863	0	0	0	0
Bra010099	0	0	0	0	0	0	0	0	0	0	0	0	0	-3.18876	0	0	0	0
Bra028980	0	0	0	0	0	0	0	0	0	0	0	0	0	4.45988	0	0	0	0
Bra010032	0	0	0	0	0	0	0	0	0	0	0	0	0	-2.21005	0	0	0	0
Bra006366	0	0	0	0	0	0	0	0	0	0	0	0	0	2.30562	0	0	0	0
Bra024988	0	0	0	0	0	0	0	0	0	0	0	0	0	-2.14786	0	0	0	0
Bra027588	0	0	0	0	0	0	0	0	0	0	0	0	0	2.61184	0	0	0	0
Bra025547	0	0	0	0	0	0	0	0	0	0	0	0	0	3.49732	0	0	0	0
Bra033077	0	0	0	0	0	0	0	0	0	0	0	0	0	-2.19888	0	0	0	0
Bra028436	0	0	0	0	0	0	0	0	0	0	0	0	0	-2.1687	0	-2.1687	0	0
Bra009783	0	0	0	0	0	0	0	0	0	0	0	0	0	-2.4971	-2.4971	0	-2.4971	-2.4971
Bra009774	0	0	0	0	0	0	0	0	0	0	0	0	0	-2.29421	-2.29421	0	0	0
Bra002400	0	0	0	0	0	0	0	0	0	0	0	0	0	-2.66027	0	0	0	0
Bra002355	0	0	0	0	0	0	0	0	0	0	0	0	0	3.76795	0	3.76795	3.76795	3.76795
Bra008719	0	0	0	0	0	0	0	0	0	0	0	0	0	-3.02078	0	0	0	0
Bra009037	0	0	0	0	0	0	0	0	0	0	0	0	0	-2.32822	0	0	0	0
Bra009223	0	0	0	0	0	0	0	0	0	0	0	0	0	2.9609	0	0	0	0
Bra021239	0	0	0	0	0	0	0	0	0	0	0	0	0	4.56611	0	0	0	0
Bra010706	0	0	0	0	0	0	0	0	0	0	0	0	0	2.22674	0	0	2.22674	2.22674
Bra011722	0	0	0	0	0	0	0	0	0	0	0	0	0	2.51616	0	0	0	0
Bra011208	0	0	0	0	0	0	0	0	0	0	0	0	0	2.22825	0	0	0	0
Bra019295	0	0	0	0	0	0	0	0	0	0	0	0	0	-2.16487	-2.16487	0	0	0
Bra013683	0	0	0	0	0	0	0	0	0	0	0	0	0	2.36433	0	0	0	0
Bra020820	0	0	0	0	0	0	0	0	0	0	0	0	0	3.65714	0	0	0	0
Bra020827	0	0	0	0	0	0	0	0	0	0	0	0	0	-2.64543	0	-2.64543	0	0
Bra013678	0	0	0	0	0	0	0	0	0	0	0	0	0	-2.24602	0	0	0	0
Bra013476	0	0	0	0	0	0	0	0	0	0	0	0	0	-3.07571	0	-3.07571	0	0
Bra021039	0	0	0	0	0	0	0	0	0	0	0	0	0	2.5723	0	0	0	0
Bra033549	0	0	0	0	0	0	0	0	0	0	0	0	0	3.14363	0	0	3.14363	3.14363
Bra033482	0	0	0	0	0	0	0	0	0	0	0	0	0	-4.43099	0	0	0	0
Bra002653	0	0	0	0	0	0	0	0	0	0	0	0	0	-2.21729	0	0	0	0
Bra036269	0	0	0	0	0	0	0	0	0	0	0	0	0	-2.44627	0	0	0	0
Bra037368	0	0	0	0	0	0	0	0	0	0	0	0	0	-2.34425	-2.34425	0	0	0
Bra033984	0	0	0	0	0	0	0	0	0	0	0	0	0	-6.45195	0	0	0	0
Bra007195	0	0	0	0	0	0	0	0	0	0	0	0	0	-4.47024	0	0	0	0
Bra033436	0	0	0	0	0	0	0	0	0	0	0	0	0	-3.37074	0	0	0	0
Bra012898	0	0	0	0	0	0	0	0	0	0	0	0	0	2.43201	2.43201	0	0	0
Bra018051	0	0	0	0	0	0	0	0	0	0	0	0	0	-4.46085	0	0	0	0
Bra038289	0	0	0	0	0	0	0	0	0	0	0	0	0	2.61822	0	0	0	0
Bra025169	0	0	0	0	0	0	0	0	0	0	0	0	0	3.91453	0	0	0	0
Bra015120	0	0	0	0	0	0	0	0	0	0	0	0	0	-2.2437	-2.2437	-2.2437	0	0
Bra001905	0	0	0	0	0	0	0	0	0	0	0	0	0	-2.44389	-2.44389	0	0	0
Bra038205	0	0	0	0	0	0	0	0	0	0	0	0	0	-2.37717	0	0	0	0
Bra001639	0	0	0	0	0	0	0	0	0	0	0	0	0	-2.25825	0	0	0	0
Bra001454	0	0	0	0	0	0	0	0	0	0	0	0	0	4.03918	4.03918	0	0	0
Bra038683	0	0	0	0	0	0	0	0	0	0	0	0	0	2.06538	0	0	0	0
Bra001367	0	0	0	0	0	0	0	0	0	0	0	0	0	2.32705	0	0	0	0
Bra040061	0	0	0	0	0	0	0	0	0	0	0	0	0	-2.66255	0	0	0	0
Bra000441	0	0	0	0	0	0	0	0	0	0	0	0	0	5.50375	5.50375	0	0	0
Bra000889	0	0	0	0	0	0	0	0	0	0	0	0	0	5.73183	0	0	0	0
Bra039316	0	0	0	0	0	0	0	0	0	0	0	0	0	-3.00577	0	0	0	0
Bra000382	0	0	0	0	0	0	0	0	0	0	0	0	0	4.37344	0	0	0	0
Bra004772	0	0	0	0	0	0	0	0	0	0	0	0	0	4.03571	0	0	0	0
Bra000311	0	0	0	0	0	0	0	0	0	0	0	0	0	3.74683	0	0	0	0
Bra004771	0	0	0	0	0	0	0	0	0	0	0	0	0	3.88769	0	0	0	0
Bra000122	0	0	0	0	0	0	0	0	0	0	0	0	0	2.82206	0	0	0	0
Bra017148	0	0	0	0	0	0	0	0	0	0	0	0	0	-2.62944	0	0	0	0
Bra021861	0	0	0	0	0	0	0	0	0	0	0	0	0	-3.63477	0	0	0	0
Bra022815	0	0	0	0	0	0	0	0	0	0	0	0	0	2.61992	0	0	0	0
Bra039982	0	0	0	0	0	0	0	0	0	0	0	0	0	2.15148	0	0	0	0
Bra000508	0	0	0	0	0	0	0	0	0	0	0	0	0	-3.33758	0	0	0	0
Bra034321	0	0	0	0	0	0	0	0	0	0	0	0	0	-2.74496	0	0	0	0
Bra039217	0	0	0	0	0	0	0	0	0	0	0	0	0	-3.49345	0	0	0	0
Bra039006	0	0	0	0	0	0	0	0	0	0	0	0	0	2.63974	2.63974	2.63974	0	0
Bra028091	0	0	0	0	0	0	0	0	0	0	0	0	0	3.56291	0	0	0	0
Bra002076	0	0	0	0	0	0	0	0	0	0	0	0	0	-3.56091	0	0	0	0
Bra033198	0	0	0	0	0	0	0	0	0	0	0	0	0	-2.40517	0	0	0	0
Bra024809	0	0	0	0	0	0	0	0	0	0	0	0	0	-2.9119	-2.9119	0	0	0
Bra026653	0	0	0	0	0	0	0	0	0	0	0	0	0	-2.54904	0	0	0	0
Bra003774	0	0	0	0	0	0	0	0	0	0	0	0	0	3.27948	0	0	0	0
Bra016073	0	0	0	0	0	0	0	0	0	0	0	0	0	4.21078	0	0	0	0
Bra016180	0	0	0	0	0	0	0	0	0	0	0	0	0	-2.67651	0	0	0	0
Bra016265	0	0	0	0	0	0	0	0	0	0	0	0	0	-2.29632	0	0	0	0
Bra027864	0	0	0	0	0	0	0	0	0	0	0	0	0	-2.16146	0	0	0	0
Bra030917	0	0	0	0	0	0	0	0	0	0	0	0	0	3.55735	0	0	0	0
Bra018942	0	0	0	0	0	0	0	0	0	0	0	0	0	3.0549	0	0	0	0
Bra010819	0	0	0	0	0	0	0	0	0	0	0	0	0	-2.37133	-2.37133	0	0	0
Bra032309	0	0	0	0	0	0	0	0	0	0	0	0	0	-2.92585	0	0	0	0
Bra010879	0	0	0	0	0	0	0	0	0	0	0	0	0	-2.46722	-2.46722	0	-2.46722	-2.46722
Bra012363	0	0	0	0	0	0	0	0	0	0	0	0	0	-2.74139	0	0	0	0
Bra025798	0	0	0	0	0	0	0	0	0	0	0	0	0	2.36992	0	0	0	0
Bra025756	0	0	0	0	0	0	0	0	0	0	0	0	0	3.4091	0	0	0	0
Bra025723	0	0	0	0	0	0	0	0	0	0	0	0	0	2.68912	2.68912	0	0	0
Bra026170	0	0	0	0	0	0	0	0	0	0	0	0	0	-5.13233	-5.13233	0	0	0
Bra026176	0	0	0	0	0	0	0	0	0	0	0	0	0	-7.54335	0	0	0	0
Bra026804	0	0	0	0	0	0	0	0	0	0	0	0	0	-2.89541	-2.89541	0	0	0
Bra019656	0	0	0	0	0	0	0	0	0	0	0	0	0	2.21922	0	0	0	0
Bra026986	0	0	0	0	0	0	0	0	0	0	0	0	0	4.25947	0	0	0	0
Bra018294	0	0	0	0	0	0	0	0	0	0	0	0	0	-2.05239	0	0	0	0
Bra030507	0	0	0	0	0	0	0	0	0	0	0	0	0	-3.94907	0	0	0	0
Bra032601	0	0	0	0	0	0	0	0	0	0	0	0	0	2.01343	0	0	0	0
Bra012088	0	0	0	0	0	0	0	0	0	0	0	0	0	0	-3.59918	0	0	0
Bra031927	0	0	0	0	0	0	0	0	0	0	0	0	0	0	-2.14585	0	0	0
Bra038608	0	0	0	0	0	0	0	0	0	0	0	0	0	0	-2.3307	0	0	0
Bra010096	0	0	0	0	0	0	0	0	0	0	0	0	0	0	-4.01894	0	-4.01894	-4.01894
Bra029259	0	0	0	0	0	0	0	0	0	0	0	0	0	0	-2.91238	0	-2.91238	-2.91238
Bra006809	0	0	0	0	0	0	0	0	0	0	0	0	0	0	3.29961	0	3.29961	3.29961
Bra020438	0	0	0	0	0	0	0	0	0	0	0	0	0	0	-2.51775	0	0	0
Bra002944	0	0	0	0	0	0	0	0	0	0	0	0	0	0	-2.1197	0	0	0
Bra022723	0	0	0	0	0	0	0	0	0	0	0	0	0	0	-3.31626	0	0	0
Bra010035	0	0	0	0	0	0	0	0	0	0	0	0	0	0	-3.87597	0	-3.87597	-3.87597
Bra025061	0	0	0	0	0	0	0	0	0	0	0	0	0	0	-2.15563	0	0	0
Bra027569	0	0	0	0	0	0	0	0	0	0	0	0	0	0	-2.1723	0	0	0
Bra027981	0	0	0	0	0	0	0	0	0	0	0	0	0	0	-3.55655	-3.55655	0	0
Bra025450	0	0	0	0	0	0	0	0	0	0	0	0	0	0	-2.06406	0	0	0
Bra028485	0	0	0	0	0	0	0	0	0	0	0	0	0	0	-3.61621	0	0	0
Bra006178	0	0	0	0	0	0	0	0	0	0	0	0	0	0	3.53692	0	0	0
Bra011739	0	0	0	0	0	0	0	0	0	0	0	0	0	0	-3.84916	0	0	0
Bra026262	0	0	0	0	0	0	0	0	0	0	0	0	0	0	-3.3587	0	0	0
Bra024088	0	0	0	0	0	0	0	0	0	0	0	0	0	0	-2.18778	0	0	0
Bra024126	0	0	0	0	0	0	0	0	0	0	0	0	0	0	-4.60522	0	0	0
Bra024213	0	0	0	0	0	0	0	0	0	0	0	0	0	0	2.5117	0	0	0
Bra019035	0	0	0	0	0	0	0	0	0	0	0	0	0	0	-3.09496	0	0	0
Bra002984	0	0	0	0	0	0	0	0	0	0	0	0	0	0	-2.38975	0	0	0
Bra026395	0	0	0	0	0	0	0	0	0	0	0	0	0	0	-2.98864	0	0	0
Bra013815	0	0	0	0	0	0	0	0	0	0	0	0	0	0	-2.98048	0	0	0
Bra019357	0	0	0	0	0	0	0	0	0	0	0	0	0	0	-2.85292	0	0	0
Bra032293	0	0	0	0	0	0	0	0	0	0	0	0	0	0	-4.35002	0	0	0
Bra014379	0	0	0	0	0	0	0	0	0	0	0	0	0	0	2.12427	0	0	0
Bra028533	0	0	0	0	0	0	0	0	0	0	0	0	0	0	-2.71734	0	0	0
Bra025161	0	0	0	0	0	0	0	0	0	0	0	0	0	0	-2.18483	0	0	0
Bra029641	0	0	0	0	0	0	0	0	0	0	0	0	0	0	-2.78961	0	0	0
Bra032001	0	0	0	0	0	0	0	0	0	0	0	0	0	0	-3.00095	0	0	0
Bra005572	0	0	0	0	0	0	0	0	0	0	0	0	0	0	-3.63303	0	0	0
Bra038517	0	0	0	0	0	0	0	0	0	0	0	0	0	0	-2.51612	0	0	0
Bra026570	0	0	0	0	0	0	0	0	0	0	0	0	0	0	3.38452	0	0	0
Bra015727	0	0	0	0	0	0	0	0	0	0	0	0	0	0	-2.84852	0	0	0
Bra008267	0	0	0	0	0	0	0	0	0	0	0	0	0	0	-3.14389	0	0	0
Bra015881	0	0	0	0	0	0	0	0	0	0	0	0	0	0	2.85297	0	0	0
Bra016025	0	0	0	0	0	0	0	0	0	0	0	0	0	0	2.34554	0	0	0
Bra007906	0	0	0	0	0	0	0	0	0	0	0	0	0	0	-2.24884	0	0	0
Bra007887	0	0	0	0	0	0	0	0	0	0	0	0	0	0	-5.66532	0	0	0
Bra004022	0	0	0	0	0	0	0	0	0	0	0	0	0	0	-2.12477	0	0	0
Bra027618	0	0	0	0	0	0	0	0	0	0	0	0	0	0	-2.48286	0	0	0
Bra039694	0	0	0	0	0	0	0	0	0	0	0	0	0	0	-2.03614	0	0	0
Bra038111	0	0	0	0	0	0	0	0	0	0	0	0	0	0	-2.05191	0	-2.05191	-2.05191
Bra024611	0	0	0	0	0	0	0	0	0	0	0	0	0	0	-2.53738	0	0	0
Bra031061	0	0	0	0	0	0	0	0	0	0	0	0	0	0	-3.54794	-3.54794	0	0
Bra025917	0	0	0	0	0	0	0	0	0	0	0	0	0	0	-3.29782	0	0	0
Bra026864	0	0	0	0	0	0	0	0	0	0	0	0	0	0	3.7146	0	0	0
Bra031656	0	0	0	0	0	0	0	0	0	0	0	0	0	0	-2.40425	0	0	0
Bra030674	0	0	0	0	0	0	0	0	0	0	0	0	0	0	-2.71025	0	0	0
Bra030526	0	0	0	0	0	0	0	0	0	0	0	0	0	0	-2.74352	0	-2.74352	-2.74352
Bra006727	0	0	0	0	0	0	0	0	0	0	0	0	0	0	0	-3.1139	0	0
Bra001986	0	0	0	0	0	0	0	0	0	0	0	0	0	0	0	-2.59949	0	0
Bra009876	0	0	0	0	0	0	0	0	0	0	0	0	0	0	0	-2.42498	0	0
Bra002271	0	0	0	0	0	0	0	0	0	0	0	0	0	0	0	-2.94351	0	0
Bra020071	0	0	0	0	0	0	0	0	0	0	0	0	0	0	0	7.06989	0	0
Bra008715	0	0	0	0	0	0	0	0	0	0	0	0	0	0	0	-5.93894	0	0
Bra009221	0	0	0	0	0	0	0	0	0	0	0	0	0	0	0	2.88942	0	0
Bra011438	0	0	0	0	0	0	0	0	0	0	0	0	0	0	0	-2.04672	0	0
Bra025325	0	0	0	0	0	0	0	0	0	0	0	0	0	0	0	-3.99702	0	0
Bra001067	0	0	0	0	0	0	0	0	0	0	0	0	0	0	0	-3.60165	0	0
Bra003833	0	0	0	0	0	0	0	0	0	0	0	0	0	0	0	-2.2155	0	0
Bra008037	0	0	0	0	0	0	0	0	0	0	0	0	0	0	0	-2.95221	0	0
Bra027156	0	0	0	0	0	0	0	0	0	0	0	0	0	0	0	-2.07376	0	0
Bra018953	0	0	0	0	0	0	0	0	0	0	0	0	0	0	0	2.25295	0	0
Bra031690	0	0	0	0	0	0	0	0	0	0	0	0	0	0	0	-3.47153	0	0
Bra036140	0	0	0	0	0	0	0	0	0	0	0	0	0	0	0	0	-2.21262	-2.21262
Bra024992	0	0	0	0	0	0	0	0	0	0	0	0	0	0	0	0	-2.02486	-2.02486
Bra037386	0	0	0	0	0	0	0	0	0	0	0	0	0	0	0	0	-2.73573	-2.73573
Bra019570	0	0	0	0	0	0	0	0	0	0	0	0	0	0	0	0	2.04321	2.04321
Bra004736	0	0	0	0	0	0	0	0	0	0	0	0	0	0	0	0	4.38428	4.38428
Bra004155	0	0	0	0	0	0	0	0	0	0	0	0	0	0	0	0	-2.29971	-2.29971
Bra033257	0	0	0	0	0	0	0	0	0	0	0	0	0	0	0	0	-3.17061	-3.17061
Bra002110	0	0	0	0	0	0	0	0	0	0	0	0	0	0	0	0	0	-2.33733

## Sheet: Sheet2 (2)
Gene_ID	Temp.	Photosyn.	Light	Gibberelllin	Water depri.	Heat	Ethylene	ABA	Circadian	Glucosinolate	Salicylic	Jasmonate	Cold	defense	Cell stress	Oxidative	salt stress	osmoticstress
Bra008715	0	0	0	0	0	0	0	0	0	0	0	0	0	0	0	-5.93894	0	0	17
Bra012949	-5.25722	0	-5.25722	0	0	-5.25722	0	0	0	0	0	0	0	0	-5.25722	-5.25722	-5.25722	-5.25722	11
Bra004994	0	0	0	0	0	0	0	0	0	0	-4.75263	0	0	-4.75263	-4.75263	-4.75263	0	0	14
Bra015922	-4.3701	0	-4.3701	0	0	-4.3701	0	0	0	0	0	0	0	0	-4.3701	-4.3701	0	0	13
Bra000557	-4.23182	0	-4.23182	0	0	-4.23182	0	0	0	0	0	0	0	0	-4.23182	-4.23182	0	0	13
Bra011636	0	0	0	0	0	0	0	0	0	0	0	-4.0791	0	0	0	-4.0791	0	0	16
Bra025325	0	0	0	0	0	0	0	0	0	0	0	0	0	0	0	-3.99702	0	0	17
Bra002283	-3.7908	0	-3.7908	0	0	0	0	0	0	0	0	0	-3.7908	0	-3.7908	-3.7908	0	0	13
Bra014527	-3.63281	0	-3.63281	0	0	0	-3.63281	-3.63281	0	0	0	-3.63281	-3.63281	-3.63281	-3.63281	-3.63281	-3.63281	-3.63281	7
Bra001067	0	0	0	0	0	0	0	0	0	0	0	0	0	0	0	-3.60165	0	0	17
Bra027981	0	0	0	0	0	0	0	0	0	0	0	0	0	0	-3.55655	-3.55655	0	0	16
Bra031061	0	0	0	0	0	0	0	0	0	0	0	0	0	0	-3.54794	-3.54794	0	0	16
Bra038538	-3.48934	0	-3.48934	0	0	-3.48934	0	0	0	0	0	0	0	-3.48934	-3.48934	-3.48934	0	0	12
Bra017839	-3.48029	0	0	0	0	0	0	0	0	0	-3.48029	0	-3.48029	0	0	-3.48029	0	0	14
Bra031690	0	0	0	0	0	0	0	0	0	0	0	0	0	0	0	-3.47153	0	0	17
Bra040158	0	0	-3.27001	0	0	0	-3.27001	0	0	0	0	0	0	-3.27001	0	-3.27001	0	0	14
Bra008920	-3.25852	0	0	0	0	-3.25852	0	0	0	0	0	0	0	0	-3.25852	-3.25852	-3.25852	-3.25852	12
Bra018383	-3.16391	0	-3.16391	0	0	-3.16391	0	0	0	0	0	0	0	0	0	-3.16391	-3.16391	-3.16391	12
Bra018477	-3.13477	0	-3.13477	0	0	-3.13477	0	0	0	0	0	0	0	0	0	-3.13477	0	0	14
Bra006727	0	0	0	0	0	0	0	0	0	0	0	0	0	0	0	-3.1139	0	0	17
Bra013476	0	0	0	0	0	0	0	0	0	0	0	0	0	-3.07571	0	-3.07571	0	0	16
Bra035236	0	0	0	0	0	0	0	0	0	0	0	-3.0542	0	-3.0542	0	-3.0542	0	0	15
Bra008037	0	0	0	0	0	0	0	0	0	0	0	0	0	0	0	-2.95221	0	0	17
Bra002271	0	0	0	0	0	0	0	0	0	0	0	0	0	0	0	-2.94351	0	0	17
Bra038734	-2.83406	0	-2.83406	0	0	-2.83406	0	0	0	0	0	0	0	0	-2.83406	-2.83406	0	0	13
Bra025439	-2.82935	0	-2.82935	0	0	-2.82935	0	-2.82935	0	0	0	0	-2.82935	-2.82935	0	-2.82935	0	0	11
Bra010922	-2.68262	0	-2.68262	0	-2.68262	0	0	-2.68262	0	0	0	0	-2.68262	0	-2.68262	-2.68262	-2.68262	-2.68262	9
Bra020827	0	0	0	0	0	0	0	0	0	0	0	0	0	-2.64543	0	-2.64543	0	0	16
Bra018183	0	0	0	0	-2.62535	0	0	-2.62535	0	0	0	0	0	0	0	-2.62535	-2.62535	-2.62535	13
Bra032474	-2.61237	0	0	0	-2.61237	0	0	0	0	0	0	0	-2.61237	0	0	-2.61237	-2.61237	-2.61237	12
Bra001986	0	0	0	0	0	0	0	0	0	0	0	0	0	0	0	-2.59949	0	0	17
Bra018216	-2.47306	0	0	0	0	-2.47306	0	0	0	0	0	0	0	0	0	-2.47306	-2.47306	-2.47306	13
Bra006692	-2.46053	0	-2.46053	0	0	-2.46053	0	0	0	0	0	0	-2.46053	0	-2.46053	-2.46053	-2.46053	-2.46053	10
Bra009876	0	0	0	0	0	0	0	0	0	0	0	0	0	0	0	-2.42498	0	0	17
Bra028759	-2.36305	0	-2.36305	0	-2.36305	-2.36305	0	0	0	0	0	0	0	0	-2.36305	-2.36305	0	0	12
Bra018907	0	0	-2.35787	0	0	0	0	0	0	0	0	0	0	0	0	-2.35787	0	0	16
Bra038281	-2.33328	0	-2.33328	0	-2.33328	0	0	-2.33328	0	0	0	0	-2.33328	-2.33328	-2.33328	-2.33328	-2.33328	-2.33328	8
Bra009229	-2.29491	0	0	0	0	0	0	-2.29491	0	0	0	-2.29491	-2.29491	0	0	-2.29491	-2.29491	-2.29491	11
Bra015120	0	0	0	0	0	0	0	0	0	0	0	0	0	-2.2437	-2.2437	-2.2437	0	0	15
Bra003833	0	0	0	0	0	0	0	0	0	0	0	0	0	0	0	-2.2155	0	0	17
Bra028436	0	0	0	0	0	0	0	0	0	0	0	0	0	-2.1687	0	-2.1687	0	0	16
Bra026317	-2.16347	0	-2.16347	0	0	-2.16347	0	0	0	0	0	0	0	0	0	-2.16347	0	0	14
Bra013226	0	0	0	0	0	0	-2.14112	0	0	0	0	0	0	0	-2.14112	-2.14112	0	0	15
Bra038612	0	0	0	0	0	0	0	0	0	0	-2.13242	0	0	0	0	-2.13242	0	0	16
Bra027156	0	0	0	0	0	0	0	0	0	0	0	0	0	0	0	-2.07376	0	0	17
Bra011438	0	0	0	0	0	0	0	0	0	0	0	0	0	0	0	-2.04672	0	0	17
Bra024339	0	0	-2.04062	0	0	0	0	0	-2.04062	0	0	0	0	0	-2.04062	-2.04062	0	0	14
Bra006195	2.57512	0	0	0	2.57512	0	2.57512	2.57512	0	2.57512	2.57512	2.57512	2.57512	0	2.57512	0	2.57512	2.57512	7
Bra004503	-4.70998	0	-4.70998	-4.70998	0	0	-4.70998	-4.70998	-4.70998	0	-4.70998	-4.70998	-4.70998	0	0	0	-4.70998	-4.70998	7
Bra030496	-4.80101	0	-4.80101	-4.80101	0	0	-4.80101	-4.80101	-4.80101	0	-4.80101	-4.80101	-4.80101	0	0	0	-4.80101	-4.80101	7
Bra029778	0	0	-3.45677	-3.45677	0	0	-3.45677	-3.45677	-3.45677	0	-3.45677	-3.45677	0	0	0	0	-3.45677	-3.45677	9
Bra029990	0	0	0	-4.248	-4.248	0	-4.248	-4.248	0	0	-4.248	-4.248	0	-4.248	0	0	-4.248	-4.248	9
Bra029258	-2.333	0	0	0	-2.333	0	0	-2.333	0	0	-2.333	0	-2.333	-2.333	0	0	-2.333	-2.333	10
Bra005751	0	0	0	-3.2615	0	0	-3.2615	-3.2615	-3.2615	0	-3.2615	-3.2615	0	0	0	0	-3.2615	-3.2615	10
Bra001907	-3.59904	0	0	0	-3.59904	0	-3.59904	0	0	0	0	-3.59904	-3.59904	0	0	0	-3.59904	-3.59904	11
Bra001320	-2.21194	0	0	0	0	0	0	0	0	-2.21194	0	0	-2.21194	-2.21194	-2.21194	0	-2.21194	-2.21194	11
Bra031210	3.15573	0	0	0	3.15573	0	0	0	3.15573	0	0	0	3.15573	3.15573	0	0	3.15573	3.15573	11
Bra036022	-2.70172	0	0	0	0	-2.70172	-2.70172	0	0	0	-2.70172	-2.70172	-2.70172	0	-2.70172	0	0	0	11
Bra016164	0	0	0	-2.83053	0	0	-2.83053	-2.83053	0	0	-2.83053	-2.83053	0	0	0	0	-2.83053	-2.83053	11
Bra003969	0	0	0	-3.79585	0	0	-3.79585	-3.79585	0	0	-3.79585	-3.79585	0	0	0	0	-3.79585	-3.79585	11
Bra011749	0	0	0	0	0	0	-2.59879	-2.59879	0	-2.59879	-2.59879	-2.59879	0	0	0	0	-2.59879	-2.59879	11
Bra006749	2.31478	0	0	0	2.31478	0	0	2.31478	0	0	0	0	2.31478	0	0	0	2.31478	2.31478	12
Bra040169	-4.44398	0	0	0	-4.44398	0	0	-4.44398	0	0	0	0	-4.44398	0	0	0	-4.44398	-4.44398	12
Bra000775	3.59572	0	0	0	0	0	0	3.59572	0	0	0	0	3.59572	3.59572	0	0	3.59572	3.59572	12
Bra039693	2.12154	0	0	0	0	0	0	0	0	0	0	0	2.12154	2.12154	2.12154	0	2.12154	2.12154	12
Bra025297	-5.0703	-5.0703	-5.0703	0	-5.0703	0	0	-5.0703	0	0	0	0	-5.0703	0	0	0	0	0	12
Bra015048	-2.84921	0	0	0	-2.84921	-2.84921	-2.84921	-2.84921	0	0	0	0	0	0	-2.84921	0	0	0	12
Bra029712	-2.6051	0	0	0	0	-2.6051	0	0	0	0	0	0	-2.6051	0	-2.6051	0	-2.6051	-2.6051	12
Bra033022	-3.45059	-3.45059	-3.45059	0	-3.45059	0	0	-3.45059	0	0	0	0	-3.45059	0	0	0	0	0	12
Bra029311	0	0	0	3.0232	0	0	0	0	0	3.0232	3.0232	3.0232	0	3.0232	3.0232	0	0	0	12
Bra023515	0	0	0	2.13565	0	0	2.13565	0	0	0	2.13565	2.13565	0	0	0	0	2.13565	2.13565	12
Bra031435	0	0	0	0	0	0	0	-2.91021	0	0	-2.91021	-2.91021	0	0	-2.91021	0	-2.91021	-2.91021	12
Bra037845	-2.45345	0	0	0	0	0	0	-2.45345	0	0	0	0	-2.45345	0	0	0	-2.45345	-2.45345	13
Bra029309	2.07297	0	0	0	0	2.07297	0	0	0	0	0	0	0	0	2.07297	0	2.07297	2.07297	13
Bra033648	5.79749	0	5.79749	0	0	0	0	5.79749	5.79749	0	0	0	5.79749	0	0	0	0	0	13
Bra034595	4.66053	0	4.66053	0	0	0	0	4.66053	4.66053	0	0	0	4.66053	0	0	0	0	0	13
Bra000876	4.31664	0	0	0	0	0	0	0	0	0	0	0	4.31664	4.31664	0	0	4.31664	4.31664	13
Bra031349	2.18045	0	0	0	2.18045	0	0	0	0	0	0	0	2.18045	0	0	0	2.18045	2.18045	13
Bra022161	2.39904	0	0	0	0	0	0	0	0	0	0	2.39904	2.39904	0	0	0	2.39904	2.39904	13
Bra016763	-6.06985	0	0	0	-6.06985	-6.06985	0	0	0	-6.06985	0	0	-6.06985	0	0	0	0	0	13
Bra032622	-3.14596	0	0	0	0	0	0	0	0	0	0	0	-3.14596	0	-3.14596	0	-3.14596	-3.14596	13
Bra017218	0	0	2.0415	2.0415	0	0	0	2.0415	0	0	2.0415	2.0415	0	0	0	0	0	0	13
Bra036653	0	0	0	-3.02422	-3.02422	0	0	-3.02422	0	0	0	0	0	0	0	0	-3.02422	-3.02422	13
Bra014426	0	0	0	0	-2.67258	0	0	0	0	0	-2.67258	-2.67258	0	-2.67258	-2.67258	0	0	0	13
Bra030957	0	0	0	0	0	0	-3.50557	-3.50557	0	0	0	-3.50557	0	-3.50557	-3.50557	0	0	0	13
Bra010292	2.14932	0	0	0	0	2.14932	0	0	0	0	0	0	2.14932	0	2.14932	0	0	0	14
Bra024953	-2.90961	0	0	0	0	0	-2.90961	0	0	0	0	0	-2.90961	-2.90961	0	0	0	0	14
Bra010441	2.06747	0	0	0	0	2.06747	0	2.06747	0	0	0	0	2.06747	0	0	0	0	0	14
Bra007205	-3.40209	0	0	0	0	0	0	0	0	0	0	0	-3.40209	-3.40209	-3.40209	0	0	0	14
Bra012828	-3.62574	0	-3.62574	0	0	-3.62574	0	0	0	0	0	0	0	0	-3.62574	0	0	0	14
Bra019599	-3.10933	0	0	0	0	0	0	0	0	0	0	0	-3.10933	-3.10933	-3.10933	0	0	0	14
Bra027359	-2.6033	0	0	0	0	0	0	0	0	-2.6033	0	0	-2.6033	-2.6033	0	0	0	0	14
Bra034845	-2.45719	0	0	0	-2.45719	0	0	-2.45719	0	0	0	0	-2.45719	0	0	0	0	0	14
Bra000170	-2.70051	0	0	0	0	0	0	0	0	0	0	0	-2.70051	-2.70051	-2.70051	0	0	0	14
Bra031180	-2.34881	0	-2.34881	0	0	-2.34881	0	0	0	0	0	0	0	0	-2.34881	0	0	0	14
Bra035150	-2.70465	0	0	0	0	0	0	0	-2.70465	0	0	0	-2.70465	-2.70465	0	0	0	0	14
Bra027083	-2.2298	-2.2298	-2.2298	0	0	0	0	0	0	0	0	0	-2.2298	0	0	0	0	0	14
Bra018850	-2.08524	0	0	0	0	0	0	0	0	0	0	0	-2.08524	0	0	0	-2.08524	-2.08524	14
Bra012251	-2.75204	0	0	0	0	0	0	0	0	0	0	0	-2.75204	-2.75204	-2.75204	0	0	0	14
Bra009735	0	0	-2.85758	0	0	0	0	0	0	0	0	0	0	0	-2.85758	0	-2.85758	-2.85758	14
Bra023317	0	0	-2.02839	-2.02839	0	0	0	-2.02839	-2.02839	0	0	0	0	0	0	0	0	0	14
Bra034941	0	0	2.08507	0	0	0	0	0	0	2.08507	0	0	0	2.08507	2.08507	0	0	0	14
Bra016230	0	0	-3.32419	0	0	0	0	0	0	0	0	-3.32419	0	0	0	0	-3.32419	-3.32419	14
Bra006694	0	0	0	2.83967	0	0	2.83967	0	0	0	2.83967	2.83967	0	0	0	0	0	0	14
Bra005351	0	0	0	0	-2.88273	0	0	-2.88273	0	0	0	0	0	0	0	0	-2.88273	-2.88273	14
Bra014666	0	0	0	0	-2.45982	0	0	0	0	0	0	0	0	0	-2.45982	0	-2.45982	-2.45982	14
Bra001752	0	0	0	0	-4.12117	0	0	-4.12117	0	0	0	0	0	0	0	0	-4.12117	-4.12117	14
Bra026062	0	0	0	0	2.19699	0	0	0	0	0	0	0	0	0	2.19699	0	2.19699	2.19699	14
Bra031903	0	0	0	0	0	0	2.72632	2.72632	0	0	0	0	0	2.72632	0	0	0	2.72632	14
Bra001122	0	0	0	0	0	0	4.72944	0	0	0	0	0	0	4.72944	0	0	4.72944	4.72944	14
Bra013123	0	0	0	0	0	0	3.41072	0	0	0	3.41072	3.41072	0	3.41072	0	0	0	0	14
Bra025914	0	0	0	0	0	0	-2.14724	0	-2.14724	0	0	0	0	0	0	0	-2.14724	-2.14724	14
Bra008850	0	0	0	0	0	0	0	2.37544	0	0	2.37544	0	0	0	2.37544	0	0	2.37544	14
Bra013714	0	0	0	0	0	0	0	2.77657	0	0	0	2.77657	0	0	0	0	2.77657	2.77657	14
Bra013426	0	0	0	0	0	0	0	3.36947	0	0	0	3.36947	0	0	0	0	3.36947	3.36947	14
Bra035954	0	0	0	0	0	0	0	0	0	-2.93833	0	-2.93833	0	-2.93833	-2.93833	0	0	0	14
Bra023450	0	0	0	0	0	0	0	0	0	2.70823	0	2.70823	0	0	0	0	2.70823	2.70823	14
Bra017373	0	0	0	0	0	0	0	0	0	0	-3.79771	0	0	-3.79771	0	0	-3.79771	-3.79771	14
Bra009783	0	0	0	0	0	0	0	0	0	0	0	0	0	-2.4971	-2.4971	0	-2.4971	-2.4971	14
Bra010879	0	0	0	0	0	0	0	0	0	0	0	0	0	-2.46722	-2.46722	0	-2.46722	-2.46722	14
Bra029292	-4.13052	0	0	0	0	-4.13052	0	0	0	0	0	0	0	0	-4.13052	0	0	0	15
Bra022722	-2.2994	0	0	0	0	0	0	0	0	0	0	0	-2.2994	0	-2.2994	0	0	0	15
Bra035732	-2.19088	0	0	0	0	-2.19088	-2.19088	0	0	0	0	0	0	0	0	0	0	0	15
Bra037477	-3.06229	0	0	0	0	-3.06229	0	0	0	0	0	0	0	0	-3.06229	0	0	0	15
Bra017628	-3.42827	0	0	0	0	0	0	0	0	0	0	0	-3.42827	0	-3.42827	0	0	0	15
Bra014430	-2.20482	0	0	0	0	0	0	0	0	0	0	0	-2.20482	0	-2.20482	0	0	0	15
Bra007315	3.91011	0	0	0	0	0	0	0	0	0	0	0	3.91011	3.91011	0	0	0	0	15
Bra007177	-5.94674	0	0	0	0	0	0	0	0	0	0	0	-5.94674	0	-5.94674	0	0	0	15
Bra001885	-2.30077	0	0	0	0	-2.30077	0	0	0	0	0	0	0	0	-2.30077	0	0	0	15
Bra015733	-2.18346	0	0	0	0	-2.18346	0	0	0	0	0	0	0	0	-2.18346	0	0	0	15
Bra018964	-2.1468	0	0	0	-2.1468	-2.1468	0	0	0	0	0	0	0	0	0	0	0	0	15
Bra026084	-3.0157	0	0	0	0	-3.0157	0	0	0	0	0	0	0	0	-3.0157	0	0	0	15
Bra031657	-3.5257	0	0	0	0	-3.5257	0	0	0	0	0	0	0	0	-3.5257	0	0	0	15
Bra002999	0	-3.19806	-3.19806	0	0	0	0	-3.19806	0	0	0	0	0	0	0	0	0	0	15
Bra019118	0	0	3.32227	3.32227	0	0	0	0	3.32227	0	0	0	0	0	0	0	0	0	15
Bra021965	0	0	-5.24685	0	-5.24685	0	0	0	0	0	0	0	0	0	-5.24685	0	0	0	15
Bra026461	0	0	2.5276	2.5276	0	0	0	0	2.5276	0	0	0	0	0	0	0	0	0	15
Bra024900	0	0	-4.05021	0	0	0	0	0	0	0	0	0	0	-4.05021	-4.05021	0	0	0	15
Bra019711	0	0	-2.89085	0	0	0	0	0	0	0	-2.89085	0	0	-2.89085	0	0	0	0	15
Bra007637	0	0	0	0	-2.92031	0	0	-2.92031	0	0	0	0	0	0	0	0	0	-2.92031	15
Bra021558	0	0	0	0	-3.23576	0	0	0	0	0	0	0	0	0	0	0	-3.23576	-3.23576	15
Bra036901	0	0	0	0	2.01241	0	0	2.01241	0	0	0	0	0	0	2.01241	0	0	0	15
Bra024539	0	0	0	0	-4.34445	0	-4.34445	0	0	0	0	0	0	0	-4.34445	0	0	0	15
Bra028291	0	0	0	0	0	0	-5.21386	0	0	-5.21386	0	0	0	-5.21386	0	0	0	0	15
Bra025280	0	0	0	0	0	0	0	-2.44465	0	0	0	0	0	0	0	0	-2.44465	-2.44465	15
Bra007334	0	0	0	0	0	0	0	-4.89487	0	0	0	0	0	0	0	0	-4.89487	-4.89487	15
Bra004840	0	0	0	0	0	0	0	0	0	6.71069	0	0	0	0	0	0	6.71069	6.71069	15
Bra015935	0	0	0	0	0	0	0	0	0	2.20475	0	2.20475	0	2.20475	0	0	0	0	15
Bra006194	0	0	0	0	0	0	0	0	0	0	3.12442	0	0	3.12442	3.12442	0	0	0	15
Bra005891	0	0	0	0	0	0	0	0	0	0	-3.20365	0	0	-3.20365	-3.20365	0	0	0	15
Bra001549	0	0	0	0	0	0	0	0	0	0	2.92906	2.92906	0	2.92906	0	0	0	0	15
Bra022905	0	0	0	0	0	0	0	0	0	0	-3.31252	-3.31252	0	-3.31252	0	0	0	0	15
Bra010706	0	0	0	0	0	0	0	0	0	0	0	0	0	2.22674	0	0	2.22674	2.22674	15
Bra033549	0	0	0	0	0	0	0	0	0	0	0	0	0	3.14363	0	0	3.14363	3.14363	15
Bra010096	0	0	0	0	0	0	0	0	0	0	0	0	0	0	-4.01894	0	-4.01894	-4.01894	15
Bra029259	0	0	0	0	0	0	0	0	0	0	0	0	0	0	-2.91238	0	-2.91238	-2.91238	15
Bra006809	0	0	0	0	0	0	0	0	0	0	0	0	0	0	3.29961	0	3.29961	3.29961	15
Bra010035	0	0	0	0	0	0	0	0	0	0	0	0	0	0	-3.87597	0	-3.87597	-3.87597	15
Bra038111	0	0	0	0	0	0	0	0	0	0	0	0	0	0	-2.05191	0	-2.05191	-2.05191	15
Bra030526	0	0	0	0	0	0	0	0	0	0	0	0	0	0	-2.74352	0	-2.74352	-2.74352	15
Bra029301	-2.14694	0	0	0	0	0	0	0	0	0	0	0	0	-2.14694	0	0	0	0	16
Bra006567	4.2334	0	0	0	0	0	0	0	0	0	0	0	4.2334	0	0	0	0	0	16
Bra011891	2.0934	0	0	0	0	0	0	0	0	0	0	0	2.0934	0	0	0	0	0	16
Bra033570	-2.80361	0	0	0	0	-2.80361	0	0	0	0	0	0	0	0	0	0	0	0	16
Bra019162	-2.51408	0	0	0	0	0	0	0	0	0	0	0	-2.51408	0	0	0	0	0	16
Bra026230	2.25682	0	0	0	0	0	0	0	0	0	0	0	2.25682	0	0	0	0	0	16
Bra036278	-2.49317	0	0	0	0	0	0	0	0	0	0	0	-2.49317	0	0	0	0	0	16
Bra017351	3.10252	0	0	0	0	0	0	0	0	0	0	0	3.10252	0	0	0	0	0	16
Bra029889	-2.26849	0	0	0	0	-2.26849	0	0	0	0	0	0	0	0	0	0	0	0	16
Bra031048	-3.61057	0	0	0	0	0	0	0	0	0	0	0	-3.61057	0	0	0	0	0	16
Bra026711	-2.52116	0	0	0	0	0	0	0	0	0	0	0	-2.52116	0	0	0	0	0	16
Bra026937	2.07484	0	0	0	0	2.07484	0	0	0	0	0	0	0	0	0	0	0	0	16
Bra032613	-2.66138	0	0	0	0	0	0	0	0	0	0	0	-2.66138	0	0	0	0	0	16
Bra000708	0	-2.05672	-2.05672	0	0	0	0	0	0	0	0	0	0	0	0	0	0	0	16
Bra005424	0	-2.78445	-2.78445	0	0	0	0	0	0	0	0	0	0	0	0	0	0	0	16
Bra030182	0	-2.60892	-2.60892	0	0	0	0	0	0	0	0	0	0	0	0	0	0	0	16
Bra010807	0	-2.106	-2.106	0	0	0	0	0	0	0	0	0	0	0	0	0	0	0	16
Bra026099	0	-2.02632	-2.02632	0	0	0	0	0	0	0	0	0	0	0	0	0	0	0	16
Bra005709	0	0	-2.06584	0	0	0	0	0	-2.06584	0	0	0	0	0	0	0	0	0	16
Bra033588	0	0	-2.16198	0	0	0	0	0	-2.16198	0	0	0	0	0	0	0	0	0	16
Bra014674	0	0	-2.22396	0	0	0	0	0	0	0	0	0	0	-2.22396	0	0	0	0	16
Bra023857	0	0	-3.40103	0	0	0	0	0	-3.40103	0	0	0	0	0	0	0	0	0	16
Bra001761	0	0	3.24396	0	0	0	0	0	0	3.24396	0	0	0	0	0	0	0	0	16
Bra021259	0	0	-2.95115	0	0	0	0	0	0	0	0	0	0	0	-2.95115	0	0	0	16
Bra001264	0	0	5.74276	0	0	0	0	0	5.74276	0	0	0	0	0	0	0	0	0	16
Bra004507	0	0	-3.88147	0	0	0	0	0	-3.88147	0	0	0	0	0	0	0	0	0	16
Bra017035	0	0	6.91239	0	0	0	0	0	6.91239	0	0	0	0	0	0	0	0	0	16
Bra038832	0	0	3.73241	0	0	0	0	0	3.73241	0	0	0	0	0	0	0	0	0	16
Bra007864	0	0	2.92623	2.92623	0	0	0	0	0	0	0	0	0	0	0	0	0	0	16
Bra026991	0	0	3.13716	0	3.13716	0	0	0	0	0	0	0	0	0	0	0	0	0	16
Bra012532	0	0	0	4.68708	0	0	0	0	0	0	0	0	0	4.68708	0	0	0	0	16
Bra016900	0	0	0	2.85219	0	0	0	2.85219	0	0	0	0	0	0	0	0	0	0	16
Bra006709	0	0	0	0	-2.82466	0	0	-2.82466	0	0	0	0	0	0	0	0	0	0	16
Bra002594	0	0	0	0	-2.02549	0	0	-2.02549	0	0	0	0	0	0	0	0	0	0	16
Bra029145	0	0	0	0	-3.34134	0	0	-3.34134	0	0	0	0	0	0	0	0	0	0	16
Bra013009	0	0	0	0	2.68023	0	0	0	0	2.68023	0	0	0	0	0	0	0	0	16
Bra026353	0	0	0	0	-2.36717	0	0	-2.36717	0	0	0	0	0	0	0	0	0	0	16
Bra006997	0	0	0	0	-2.09094	0	0	-2.09094	0	0	0	0	0	0	0	0	0	0	16
Bra012803	0	0	0	0	-2.4581	0	0	0	0	0	0	0	0	-2.4581	0	0	0	0	16
Bra021113	0	0	0	0	2.38795	0	0	0	0	0	0	2.38795	0	0	0	0	0	0	16
Bra023103	0	0	0	0	-2.48648	0	0	-2.48648	0	0	0	0	0	0	0	0	0	0	16
Bra017278	0	0	0	0	-2.75242	0	0	0	0	0	0	0	0	-2.75242	0	0	0	0	16
Bra023278	0	0	0	0	-3.0184	0	0	0	0	0	0	0	0	0	0	0	0	-3.0184	16
Bra029302	0	0	0	0	0	0	2.25427	0	0	0	0	0	0	2.25427	0	0	0	0	16
Bra017656	0	0	0	0	0	0	-6.20964	0	0	0	0	0	0	-6.20964	0	0	0	0	16
Bra012910	0	0	0	0	0	0	-3.99209	0	0	0	-3.99209	0	0	0	0	0	0	0	16
Bra023756	0	0	0	0	0	0	2.39781	0	0	0	0	0	0	0	2.39781	0	0	0	16
Bra037630	0	0	0	0	0	0	-4.61055	0	0	0	0	0	0	-4.61055	0	0	0	0	16
Bra021712	0	0	0	0	0	0	3.31568	0	0	0	0	0	0	3.31568	0	0	0	0	16
Bra015882	0	0	0	0	0	0	-3.30023	0	0	0	0	0	0	-3.30023	0	0	0	0	16
Bra008032	0	0	0	0	0	0	-2.4744	0	0	0	0	0	0	0	-2.4744	0	0	0	16
Bra003883	0	0	0	0	0	0	2.53113	0	0	0	0	0	0	0	2.53113	0	0	0	16
Bra010881	0	0	0	0	0	0	-3.22061	0	0	0	0	0	0	-3.22061	0	0	0	0	16
Bra028290	0	0	0	0	0	0	0	-6.13537	0	-6.13537	0	0	0	0	0	0	0	0	16
Bra006862	0	0	0	0	0	0	0	-2.44457	0	0	0	0	0	-2.44457	0	0	0	0	16
Bra001422	0	0	0	0	0	0	0	-3.09588	0	0	0	0	0	-3.09588	0	0	0	0	16
Bra022772	0	0	0	0	0	0	0	-3.64997	0	0	0	0	0	-3.64997	0	0	0	0	16
Bra004330	0	0	0	0	0	0	0	-3.62253	0	0	0	0	0	0	-3.62253	0	0	0	16
Bra033239	0	0	0	0	0	0	0	-2.54767	0	0	0	0	0	0	-2.54767	0	0	0	16
Bra037456	0	0	0	0	0	0	0	0	0	-2.42311	0	0	0	0	-2.42311	0	0	0	16
Bra000760	0	0	0	0	0	0	0	0	0	3.22865	0	3.22865	0	0	0	0	0	0	16
Bra013227	0	0	0	0	0	0	0	0	0	-2.43895	0	0	0	-2.43895	0	0	0	0	16
Bra012409	0	0	0	0	0	0	0	0	0	-2.14639	0	0	0	-2.14639	0	0	0	0	16
Bra030589	0	0	0	0	0	0	0	0	0	-3.55856	0	0	0	0	-3.55856	0	0	0	16
Bra020197	0	0	0	0	0	0	0	0	0	0	2.98463	0	0	2.98463	0	0	0	0	16
Bra023211	0	0	0	0	0	0	0	0	0	0	2.74276	0	0	2.74276	0	0	0	0	16
Bra019324	0	0	0	0	0	0	0	0	0	0	2.89443	0	0	2.89443	0	0	0	0	16
Bra020821	0	0	0	0	0	0	0	0	0	0	2.82978	0	0	2.82978	0	0	0	0	16
Bra013138	0	0	0	0	0	0	0	0	0	0	4.38917	0	0	4.38917	0	0	0	0	16
Bra003588	0	0	0	0	0	0	0	0	0	0	-4.51987	0	0	-4.51987	0	0	0	0	16
Bra003598	0	0	0	0	0	0	0	0	0	0	3.46075	0	0	3.46075	0	0	0	0	16
Bra015912	0	0	0	0	0	0	0	0	0	0	-2.41281	-2.41281	0	0	0	0	0	0	16
Bra032911	0	0	0	0	0	0	0	0	0	0	-3.79739	-3.79739	0	0	0	0	0	0	16
Bra025884	0	0	0	0	0	0	0	0	0	0	3.25447	0	0	3.25447	0	0	0	0	16
Bra019862	0	0	0	0	0	0	0	0	0	0	2.04603	0	0	2.04603	0	0	0	0	16
Bra024328	0	0	0	0	0	0	0	0	0	0	0	2.03124	0	2.03124	0	0	0	0	16
Bra035641	0	0	0	0	0	0	0	0	0	0	0	-3.52701	0	-3.52701	0	0	0	0	16
Bra023998	0	0	0	0	0	0	0	0	0	0	0	-2.3913	0	-2.3913	0	0	0	0	16
Bra022981	0	0	0	0	0	0	0	0	0	0	0	-5.09672	0	-5.09672	0	0	0	0	16
Bra031065	0	0	0	0	0	0	0	0	0	0	0	-3.48142	0	-3.48142	0	0	0	0	16
Bra032362	0	0	0	0	0	0	0	0	0	0	0	-2.86185	0	-2.86185	0	0	0	0	16
Bra025713	0	0	0	0	0	0	0	0	0	0	0	-2.21268	0	-2.21268	0	0	0	0	16
Bra025951	0	0	0	0	0	0	0	0	0	0	0	-3.90362	0	-3.90362	0	0	0	0	16
Bra012058	0	0	0	0	0	0	0	-3.54359	0	0	0	0	0	-3.54359	0	0	0	0	16
Bra009663	0	0	0	0	0	0	0	-3.44863	0	0	0	0	0	-3.44863	0	0	0	0	16
Bra009774	0	0	0	0	0	0	0	0	0	0	0	0	0	-2.29421	-2.29421	0	0	0	16
Bra019295	0	0	0	0	0	0	0	0	0	0	0	0	0	-2.16487	-2.16487	0	0	0	16
Bra037368	0	0	0	0	0	0	0	0	0	0	0	0	0	-2.34425	-2.34425	0	0	0	16
Bra012898	0	0	0	0	0	0	0	0	0	0	0	0	0	2.43201	2.43201	0	0	0	16
Bra001905	0	0	0	0	0	0	0	0	0	0	0	0	0	-2.44389	-2.44389	0	0	0	16
Bra001454	0	0	0	0	0	0	0	0	0	0	0	0	0	4.03918	4.03918	0	0	0	16
Bra000441	0	0	0	0	0	0	0	0	0	0	0	0	0	5.50375	5.50375	0	0	0	16
Bra024809	0	0	0	0	0	0	0	0	0	0	0	0	0	-2.9119	-2.9119	0	0	0	16
Bra010819	0	0	0	0	0	0	0	0	0	0	0	0	0	-2.37133	-2.37133	0	0	0	16
Bra025723	0	0	0	0	0	0	0	0	0	0	0	0	0	2.68912	2.68912	0	0	0	16
Bra026170	0	0	0	0	0	0	0	0	0	0	0	0	0	-5.13233	-5.13233	0	0	0	16
Bra026804	0	0	0	0	0	0	0	0	0	0	0	0	0	-2.89541	-2.89541	0	0	0	16
Bra036140	0	0	0	0	0	0	0	0	0	0	0	0	0	0	0	0	-2.21262	-2.21262	16
Bra024992	0	0	0	0	0	0	0	0	0	0	0	0	0	0	0	0	-2.02486	-2.02486	16
Bra037386	0	0	0	0	0	0	0	0	0	0	0	0	0	0	0	0	-2.73573	-2.73573	16
Bra019570	0	0	0	0	0	0	0	0	0	0	0	0	0	0	0	0	2.04321	2.04321	16
Bra004736	0	0	0	0	0	0	0	0	0	0	0	0	0	0	0	0	4.38428	4.38428	16
Bra004155	0	0	0	0	0	0	0	0	0	0	0	0	0	0	0	0	-2.29971	-2.29971	16
Bra033257	0	0	0	0	0	0	0	0	0	0	0	0	0	0	0	0	-3.17061	-3.17061	16
Bra008216	0	-2.445	0	0	0	0	0	0	0	0	0	0	0	0	0	0	0	0	17
Bra012972	0	0	-2.70884	0	0	0	0	0	0	0	0	0	0	0	0	0	0	0	17
Bra026485	0	0	-2.84234	0	0	0	0	0	0	0	0	0	0	0	0	0	0	0	17
Bra006085	0	0	3.3144	0	0	0	0	0	0	0	0	0	0	0	0	0	0	0	17
Bra037747	0	0	-2.64858	0	0	0	0	0	0	0	0	0	0	0	0	0	0	0	17
Bra010713	0	0	4.30981	0	0	0	0	0	0	0	0	0	0	0	0	0	0	0	17
Bra039194	0	0	3.14088	0	0	0	0	0	0	0	0	0	0	0	0	0	0	0	17
Bra011332	0	0	2.04377	0	0	0	0	0	0	0	0	0	0	0	0	0	0	0	17
Bra019058	0	0	-3.17663	0	0	0	0	0	0	0	0	0	0	0	0	0	0	0	17
Bra012784	0	0	-5.60002	0	0	0	0	0	0	0	0	0	0	0	0	0	0	0	17
Bra019466	0	0	-2.25728	0	0	0	0	0	0	0	0	0	0	0	0	0	0	0	17
Bra031255	0	0	-4.12096	0	0	0	0	0	0	0	0	0	0	0	0	0	0	0	17
Bra022225	0	0	-3.66639	0	0	0	0	0	0	0	0	0	0	0	0	0	0	0	17
Bra022191	0	0	-2.72452	0	0	0	0	0	0	0	0	0	0	0	0	0	0	0	17
Bra039338	0	0	-2.11198	0	0	0	0	0	0	0	0	0	0	0	0	0	0	0	17
Bra004718	0	0	3.44241	0	0	0	0	0	0	0	0	0	0	0	0	0	0	0	17
Bra016886	0	0	2.68306	0	0	0	0	0	0	0	0	0	0	0	0	0	0	0	17
Bra018249	0	0	-3.05805	0	0	0	0	0	0	0	0	0	0	0	0	0	0	0	17
Bra022805	0	0	-3.00126	0	0	0	0	0	0	0	0	0	0	0	0	0	0	0	17
Bra031619	0	0	2.50452	0	0	0	0	0	0	0	0	0	0	0	0	0	0	0	17
Bra007843	0	0	-2.05169	0	0	0	0	0	0	0	0	0	0	0	0	0	0	0	17
Bra039937	0	0	-2.29305	0	0	0	0	0	0	0	0	0	0	0	0	0	0	0	17
Bra026572	0	0	2.51493	0	0	0	0	0	0	0	0	0	0	0	0	0	0	0	17
Bra016635	0	0	3.25939	0	0	0	0	0	0	0	0	0	0	0	0	0	0	0	17
Bra003670	0	0	-3.6863	0	0	0	0	0	0	0	0	0	0	0	0	0	0	0	17
Bra015866	0	0	-2.03766	0	0	0	0	0	0	0	0	0	0	0	0	0	0	0	17
Bra034424	0	0	-2.79607	0	0	0	0	0	0	0	0	0	0	0	0	0	0	0	17
Bra012299	0	0	2.43986	0	0	0	0	0	0	0	0	0	0	0	0	0	0	0	17
Bra033324	0	0	-4.35391	0	0	0	0	0	0	0	0	0	0	0	0	0	0	0	17
Bra036183	0	0	0	-2.23092	0	0	0	0	0	0	0	0	0	0	0	0	0	0	17
Bra028724	0	0	0	2.61838	0	0	0	0	0	0	0	0	0	0	0	0	0	0	17
Bra017759	0	0	0	2.83117	0	0	0	0	0	0	0	0	0	0	0	0	0	0	17
Bra007378	0	0	0	2.58764	0	0	0	0	0	0	0	0	0	0	0	0	0	0	17
Bra004946	0	0	0	2.35462	0	0	0	0	0	0	0	0	0	0	0	0	0	0	17
Bra021903	0	0	0	2.63438	0	0	0	0	0	0	0	0	0	0	0	0	0	0	17
Bra007603	0	0	0	0	-3.2367	0	0	0	0	0	0	0	0	0	0	0	0	0	17
Bra015025	0	0	0	0	-2.36115	0	0	0	0	0	0	0	0	0	0	0	0	0	17
Bra022179	0	0	0	0	-2.23448	0	0	0	0	0	0	0	0	0	0	0	0	0	17
Bra006599	0	0	0	0	0	0	-4.10502	0	0	0	0	0	0	0	0	0	0	0	17
Bra008952	0	0	0	0	0	0	-2.33969	0	0	0	0	0	0	0	0	0	0	0	17
Bra009250	0	0	0	0	0	0	4.27494	0	0	0	0	0	0	0	0	0	0	0	17
Bra011833	0	0	0	0	0	0	2.18359	0	0	0	0	0	0	0	0	0	0	0	17
Bra011383	0	0	0	0	0	0	-2.87256	0	0	0	0	0	0	0	0	0	0	0	17
Bra004449	0	0	0	0	0	0	2.19697	0	0	0	0	0	0	0	0	0	0	0	17
Bra016136	0	0	0	0	0	0	-5.72598	0	0	0	0	0	0	0	0	0	0	0	17
Bra027736	0	0	0	0	0	0	-2.44745	0	0	0	0	0	0	0	0	0	0	0	17
Bra010210	0	0	0	0	0	0	-4.02874	0	0	0	0	0	0	0	0	0	0	0	17
Bra032901	0	0	0	0	0	0	-5.32533	0	0	0	0	0	0	0	0	0	0	0	17
Bra031069	0	0	0	0	0	0	-6.05413	0	0	0	0	0	0	0	0	0	0	0	17
Bra016518	0	0	0	0	0	0	-4.93862	0	0	0	0	0	0	0	0	0	0	0	17
Bra029093	0	0	0	0	0	0	0	2.3093	0	0	0	0	0	0	0	0	0	0	17
Bra025012	0	0	0	0	0	0	0	4.33605	0	0	0	0	0	0	0	0	0	0	17
Bra009294	0	0	0	0	0	0	0	-4.23529	0	0	0	0	0	0	0	0	0	0	17
Bra023576	0	0	0	0	0	0	0	-2.01062	0	0	0	0	0	0	0	0	0	0	17
Bra023398	0	0	0	0	0	0	0	-2.25029	0	0	0	0	0	0	0	0	0	0	17
Bra029496	0	0	0	0	0	0	0	3.3589	0	0	0	0	0	0	0	0	0	0	17
Bra006975	0	0	0	0	0	0	0	2.32218	0	0	0	0	0	0	0	0	0	0	17
Bra025400	0	0	0	0	0	0	0	-2.50962	0	0	0	0	0	0	0	0	0	0	17
Bra036353	0	0	0	0	0	0	0	-2.07191	0	0	0	0	0	0	0	0	0	0	17
Bra001789	0	0	0	0	0	0	0	-2.31436	0	0	0	0	0	0	0	0	0	0	17
Bra006218	0	0	0	0	0	0	0	-2.04536	0	0	0	0	0	0	0	0	0	0	17
Bra031431	0	0	0	0	0	0	0	2.02228	0	0	0	0	0	0	0	0	0	0	17
Bra004748	0	0	0	0	0	0	0	2.3761	0	0	0	0	0	0	0	0	0	0	17
Bra005071	0	0	0	0	0	0	0	4.2581	0	0	0	0	0	0	0	0	0	0	17
Bra004004	0	0	0	0	0	0	0	-2.20745	0	0	0	0	0	0	0	0	0	0	17
Bra027664	0	0	0	0	0	0	0	-2.56554	0	0	0	0	0	0	0	0	0	0	17
Bra039700	0	0	0	0	0	0	0	-2.20253	0	0	0	0	0	0	0	0	0	0	17
Bra012964	0	0	0	0	0	0	0	0	2.67773	0	0	0	0	0	0	0	0	0	17
Bra033809	0	0	0	0	0	0	0	0	3.67006	0	0	0	0	0	0	0	0	0	17
Bra023610	0	0	0	0	0	0	0	0	-3.02225	0	0	0	0	0	0	0	0	0	17
Bra005984	0	0	0	0	0	0	0	0	-2.32912	0	0	0	0	0	0	0	0	0	17
Bra009302	0	0	0	0	0	0	0	0	-2.9048	0	0	0	0	0	0	0	0	0	17
Bra007099	0	0	0	0	0	0	0	0	-3.13731	0	0	0	0	0	0	0	0	0	17
Bra003187	0	0	0	0	0	0	0	0	-2.71697	0	0	0	0	0	0	0	0	0	17
Bra018204	0	0	0	0	0	0	0	0	4.96642	0	0	0	0	0	0	0	0	0	17
Bra035742	0	0	0	0	0	0	0	0	7.07217	0	0	0	0	0	0	0	0	0	17
Bra027323	0	0	0	0	0	0	0	0	4.26212	0	0	0	0	0	0	0	0	0	17
Bra034762	0	0	0	0	0	0	0	0	-4.9707	0	0	0	0	0	0	0	0	0	17
Bra021480	0	0	0	0	0	0	0	0	-2.2659	0	0	0	0	0	0	0	0	0	17
Bra022302	0	0	0	0	0	0	0	0	0	2.18791	0	0	0	0	0	0	0	0	17
Bra039495	0	0	0	0	0	0	0	0	0	2.30022	0	0	0	0	0	0	0	0	17
Bra011757	0	0	0	0	0	0	0	0	0	-2.04304	0	0	0	0	0	0	0	0	17
Bra032734	0	0	0	0	0	0	0	0	0	2.73574	0	0	0	0	0	0	0	0	17
Bra039038	0	0	0	0	0	0	0	0	0	-3.09155	0	0	0	0	0	0	0	0	17
Bra021175	0	0	0	0	0	0	0	0	0	-2.34857	0	0	0	0	0	0	0	0	17
Bra001411	0	0	0	0	0	0	0	0	0	2.30281	0	0	0	0	0	0	0	0	17
Bra021672	0	0	0	0	0	0	0	0	0	2.23962	0	0	0	0	0	0	0	0	17
Bra015938	0	0	0	0	0	0	0	0	0	2.58615	0	0	0	0	0	0	0	0	17
Bra016432	0	0	0	0	0	0	0	0	0	3.10014	0	0	0	0	0	0	0	0	17
Bra012270	0	0	0	0	0	0	0	0	0	2.33847	0	0	0	0	0	0	0	0	17
Bra025668	0	0	0	0	0	0	0	0	0	2.43194	0	0	0	0	0	0	0	0	17
Bra026058	0	0	0	0	0	0	0	0	0	3.0285	0	0	0	0	0	0	0	0	17
Bra026104	0	0	0	0	0	0	0	0	0	0	3.04248	0	0	0	0	0	0	0	17
Bra015435	0	0	0	0	0	0	0	0	0	0	2.00665	0	0	0	0	0	0	0	17
Bra009300	0	0	0	0	0	0	0	0	0	0	0	3.33844	0	0	0	0	0	0	17
Bra028752	0	0	0	0	0	0	0	0	0	0	0	2.72881	0	0	0	0	0	0	17
Bra021082	0	0	0	0	0	0	0	0	0	0	0	2.98581	0	0	0	0	0	0	17
Bra004058	0	0	0	0	0	0	0	0	0	0	0	3.57838	0	0	0	0	0	0	17
Bra021114	0	0	0	0	0	0	0	0	0	0	0	2.05864	0	0	0	0	0	0	17
Bra017132	0	0	0	0	0	0	0	0	0	0	0	4.10151	0	0	0	0	0	0	17
Bra007828	0	0	0	0	0	0	0	0	0	0	0	2.05411	0	0	0	0	0	0	17
Bra037139	0	0	0	0	0	0	0	0	0	0	0	0	0	-2.1463	0	0	0	0	17
Bra010099	0	0	0	0	0	0	0	0	0	0	0	0	0	-3.18876	0	0	0	0	17
Bra028980	0	0	0	0	0	0	0	0	0	0	0	0	0	4.45988	0	0	0	0	17
Bra010032	0	0	0	0	0	0	0	0	0	0	0	0	0	-2.21005	0	0	0	0	17
Bra006366	0	0	0	0	0	0	0	0	0	0	0	0	0	2.30562	0	0	0	0	17
Bra024988	0	0	0	0	0	0	0	0	0	0	0	0	0	-2.14786	0	0	0	0	17
Bra027588	0	0	0	0	0	0	0	0	0	0	0	0	0	2.61184	0	0	0	0	17
Bra025547	0	0	0	0	0	0	0	0	0	0	0	0	0	3.49732	0	0	0	0	17
Bra033077	0	0	0	0	0	0	0	0	0	0	0	0	0	-2.19888	0	0	0	0	17
Bra002400	0	0	0	0	0	0	0	0	0	0	0	0	0	-2.66027	0	0	0	0	17
Bra008719	0	0	0	0	0	0	0	0	0	0	0	0	0	-3.02078	0	0	0	0	17
Bra009037	0	0	0	0	0	0	0	0	0	0	0	0	0	-2.32822	0	0	0	0	17
Bra009223	0	0	0	0	0	0	0	0	0	0	0	0	0	2.9609	0	0	0	0	17
Bra021239	0	0	0	0	0	0	0	0	0	0	0	0	0	4.56611	0	0	0	0	17
Bra011722	0	0	0	0	0	0	0	0	0	0	0	0	0	2.51616	0	0	0	0	17
Bra011208	0	0	0	0	0	0	0	0	0	0	0	0	0	2.22825	0	0	0	0	17
Bra013683	0	0	0	0	0	0	0	0	0	0	0	0	0	2.36433	0	0	0	0	17
Bra020820	0	0	0	0	0	0	0	0	0	0	0	0	0	3.65714	0	0	0	0	17
Bra013678	0	0	0	0	0	0	0	0	0	0	0	0	0	-2.24602	0	0	0	0	17
Bra021039	0	0	0	0	0	0	0	0	0	0	0	0	0	2.5723	0	0	0	0	17
Bra033482	0	0	0	0	0	0	0	0	0	0	0	0	0	-4.43099	0	0	0	0	17
Bra002653	0	0	0	0	0	0	0	0	0	0	0	0	0	-2.21729	0	0	0	0	17
Bra036269	0	0	0	0	0	0	0	0	0	0	0	0	0	-2.44627	0	0	0	0	17
Bra033984	0	0	0	0	0	0	0	0	0	0	0	0	0	-6.45195	0	0	0	0	17
Bra007195	0	0	0	0	0	0	0	0	0	0	0	0	0	-4.47024	0	0	0	0	17
Bra033436	0	0	0	0	0	0	0	0	0	0	0	0	0	-3.37074	0	0	0	0	17
Bra018051	0	0	0	0	0	0	0	0	0	0	0	0	0	-4.46085	0	0	0	0	17
Bra038289	0	0	0	0	0	0	0	0	0	0	0	0	0	2.61822	0	0	0	0	17
Bra025169	0	0	0	0	0	0	0	0	0	0	0	0	0	3.91453	0	0	0	0	17
Bra038205	0	0	0	0	0	0	0	0	0	0	0	0	0	-2.37717	0	0	0	0	17
Bra001639	0	0	0	0	0	0	0	0	0	0	0	0	0	-2.25825	0	0	0	0	17
Bra038683	0	0	0	0	0	0	0	0	0	0	0	0	0	2.06538	0	0	0	0	17
Bra001367	0	0	0	0	0	0	0	0	0	0	0	0	0	2.32705	0	0	0	0	17
Bra040061	0	0	0	0	0	0	0	0	0	0	0	0	0	-2.66255	0	0	0	0	17
Bra000889	0	0	0	0	0	0	0	0	0	0	0	0	0	5.73183	0	0	0	0	17
Bra039316	0	0	0	0	0	0	0	0	0	0	0	0	0	-3.00577	0	0	0	0	17
Bra000382	0	0	0	0	0	0	0	0	0	0	0	0	0	4.37344	0	0	0	0	17
Bra004772	0	0	0	0	0	0	0	0	0	0	0	0	0	4.03571	0	0	0	0	17
Bra000311	0	0	0	0	0	0	0	0	0	0	0	0	0	3.74683	0	0	0	0	17
Bra004771	0	0	0	0	0	0	0	0	0	0	0	0	0	3.88769	0	0	0	0	17
Bra000122	0	0	0	0	0	0	0	0	0	0	0	0	0	2.82206	0	0	0	0	17
Bra017148	0	0	0	0	0	0	0	0	0	0	0	0	0	-2.62944	0	0	0	0	17
Bra021861	0	0	0	0	0	0	0	0	0	0	0	0	0	-3.63477	0	0	0	0	17
Bra022815	0	0	0	0	0	0	0	0	0	0	0	0	0	2.61992	0	0	0	0	17
Bra039982	0	0	0	0	0	0	0	0	0	0	0	0	0	2.15148	0	0	0	0	17
Bra000508	0	0	0	0	0	0	0	0	0	0	0	0	0	-3.33758	0	0	0	0	17
Bra034321	0	0	0	0	0	0	0	0	0	0	0	0	0	-2.74496	0	0	0	0	17
Bra039217	0	0	0	0	0	0	0	0	0	0	0	0	0	-3.49345	0	0	0	0	17
Bra028091	0	0	0	0	0	0	0	0	0	0	0	0	0	3.56291	0	0	0	0	17
Bra002076	0	0	0	0	0	0	0	0	0	0	0	0	0	-3.56091	0	0	0	0	17
Bra033198	0	0	0	0	0	0	0	0	0	0	0	0	0	-2.40517	0	0	0	0	17
Bra026653	0	0	0	0	0	0	0	0	0	0	0	0	0	-2.54904	0	0	0	0	17
Bra003774	0	0	0	0	0	0	0	0	0	0	0	0	0	3.27948	0	0	0	0	17
Bra016073	0	0	0	0	0	0	0	0	0	0	0	0	0	4.21078	0	0	0	0	17
Bra016180	0	0	0	0	0	0	0	0	0	0	0	0	0	-2.67651	0	0	0	0	17
Bra016265	0	0	0	0	0	0	0	0	0	0	0	0	0	-2.29632	0	0	0	0	17
Bra027864	0	0	0	0	0	0	0	0	0	0	0	0	0	-2.16146	0	0	0	0	17
Bra030917	0	0	0	0	0	0	0	0	0	0	0	0	0	3.55735	0	0	0	0	17
Bra018942	0	0	0	0	0	0	0	0	0	0	0	0	0	3.0549	0	0	0	0	17
Bra032309	0	0	0	0	0	0	0	0	0	0	0	0	0	-2.92585	0	0	0	0	17
Bra012363	0	0	0	0	0	0	0	0	0	0	0	0	0	-2.74139	0	0	0	0	17
Bra025798	0	0	0	0	0	0	0	0	0	0	0	0	0	2.36992	0	0	0	0	17
Bra025756	0	0	0	0	0	0	0	0	0	0	0	0	0	3.4091	0	0	0	0	17
Bra026176	0	0	0	0	0	0	0	0	0	0	0	0	0	-7.54335	0	0	0	0	17
Bra019656	0	0	0	0	0	0	0	0	0	0	0	0	0	2.21922	0	0	0	0	17
Bra026986	0	0	0	0	0	0	0	0	0	0	0	0	0	4.25947	0	0	0	0	17
Bra018294	0	0	0	0	0	0	0	0	0	0	0	0	0	-2.05239	0	0	0	0	17
Bra030507	0	0	0	0	0	0	0	0	0	0	0	0	0	-3.94907	0	0	0	0	17
Bra032601	0	0	0	0	0	0	0	0	0	0	0	0	0	2.01343	0	0	0	0	17
Bra012088	0	0	0	0	0	0	0	0	0	0	0	0	0	0	-3.59918	0	0	0	17
Bra031927	0	0	0	0	0	0	0	0	0	0	0	0	0	0	-2.14585	0	0	0	17
Bra038608	0	0	0	0	0	0	0	0	0	0	0	0	0	0	-2.3307	0	0	0	17
Bra020438	0	0	0	0	0	0	0	0	0	0	0	0	0	0	-2.51775	0	0	0	17
Bra002944	0	0	0	0	0	0	0	0	0	0	0	0	0	0	-2.1197	0	0	0	17
Bra022723	0	0	0	0	0	0	0	0	0	0	0	0	0	0	-3.31626	0	0	0	17
Bra025061	0	0	0	0	0	0	0	0	0	0	0	0	0	0	-2.15563	0	0	0	17
Bra027569	0	0	0	0	0	0	0	0	0	0	0	0	0	0	-2.1723	0	0	0	17
Bra025450	0	0	0	0	0	0	0	0	0	0	0	0	0	0	-2.06406	0	0	0	17
Bra028485	0	0	0	0	0	0	0	0	0	0	0	0	0	0	-3.61621	0	0	0	17
Bra006178	0	0	0	0	0	0	0	0	0	0	0	0	0	0	3.53692	0	0	0	17
Bra011739	0	0	0	0	0	0	0	0	0	0	0	0	0	0	-3.84916	0	0	0	17
Bra026262	0	0	0	0	0	0	0	0	0	0	0	0	0	0	-3.3587	0	0	0	17
Bra024088	0	0	0	0	0	0	0	0	0	0	0	0	0	0	-2.18778	0	0	0	17
Bra024126	0	0	0	0	0	0	0	0	0	0	0	0	0	0	-4.60522	0	0	0	17
Bra024213	0	0	0	0	0	0	0	0	0	0	0	0	0	0	2.5117	0	0	0	17
Bra019035	0	0	0	0	0	0	0	0	0	0	0	0	0	0	-3.09496	0	0	0	17
Bra002984	0	0	0	0	0	0	0	0	0	0	0	0	0	0	-2.38975	0	0	0	17
Bra026395	0	0	0	0	0	0	0	0	0	0	0	0	0	0	-2.98864	0	0	0	17
Bra013815	0	0	0	0	0	0	0	0	0	0	0	0	0	0	-2.98048	0	0	0	17
Bra019357	0	0	0	0	0	0	0	0	0	0	0	0	0	0	-2.85292	0	0	0	17
Bra032293	0	0	0	0	0	0	0	0	0	0	0	0	0	0	-4.35002	0	0	0	17
Bra014379	0	0	0	0	0	0	0	0	0	0	0	0	0	0	2.12427	0	0	0	17
Bra028533	0	0	0	0	0	0	0	0	0	0	0	0	0	0	-2.71734	0	0	0	17
Bra025161	0	0	0	0	0	0	0	0	0	0	0	0	0	0	-2.18483	0	0	0	17
Bra029641	0	0	0	0	0	0	0	0	0	0	0	0	0	0	-2.78961	0	0	0	17
Bra032001	0	0	0	0	0	0	0	0	0	0	0	0	0	0	-3.00095	0	0	0	17
Bra005572	0	0	0	0	0	0	0	0	0	0	0	0	0	0	-3.63303	0	0	0	17
Bra038517	0	0	0	0	0	0	0	0	0	0	0	0	0	0	-2.51612	0	0	0	17
Bra026570	0	0	0	0	0	0	0	0	0	0	0	0	0	0	3.38452	0	0	0	17
Bra015727	0	0	0	0	0	0	0	0	0	0	0	0	0	0	-2.84852	0	0	0	17
Bra008267	0	0	0	0	0	0	0	0	0	0	0	0	0	0	-3.14389	0	0	0	17
Bra015881	0	0	0	0	0	0	0	0	0	0	0	0	0	0	2.85297	0	0	0	17
Bra016025	0	0	0	0	0	0	0	0	0	0	0	0	0	0	2.34554	0	0	0	17
Bra007906	0	0	0	0	0	0	0	0	0	0	0	0	0	0	-2.24884	0	0	0	17
Bra007887	0	0	0	0	0	0	0	0	0	0	0	0	0	0	-5.66532	0	0	0	17
Bra004022	0	0	0	0	0	0	0	0	0	0	0	0	0	0	-2.12477	0	0	0	17
Bra027618	0	0	0	0	0	0	0	0	0	0	0	0	0	0	-2.48286	0	0	0	17
Bra039694	0	0	0	0	0	0	0	0	0	0	0	0	0	0	-2.03614	0	0	0	17
Bra024611	0	0	0	0	0	0	0	0	0	0	0	0	0	0	-2.53738	0	0	0	17
Bra025917	0	0	0	0	0	0	0	0	0	0	0	0	0	0	-3.29782	0	0	0	17
Bra026864	0	0	0	0	0	0	0	0	0	0	0	0	0	0	3.7146	0	0	0	17
Bra031656	0	0	0	0	0	0	0	0	0	0	0	0	0	0	-2.40425	0	0	0	17
Bra030674	0	0	0	0	0	0	0	0	0	0	0	0	0	0	-2.71025	0	0	0	17
Bra002110	0	0	0	0	0	0	0	0	0	0	0	0	0	0	0	0	0	-2.33733	17
Bra025832	2.10451	0	2.10451	0	0	0	0	0	0	0	0	0	2.10451	0	2.10451	2.10451	0	0	13
Bra018953	0	0	0	0	0	0	0	0	0	0	0	0	0	0	0	2.25295	0	0	17
Bra031663	2.52931	0	0	0	0	0	0	0	0	0	0	0	2.52931	0	0	2.52931	0	0	15
Bra039006	0	0	0	0	0	0	0	0	0	0	0	0	0	2.63974	2.63974	2.63974	0	0	15
Bra026124	2.83779	0	0	0	2.83779	2.83779	2.83779	2.83779	0	0	2.83779	2.83779	2.83779	2.83779	2.83779	2.83779	0	0	7
Bra009221	0	0	0	0	0	0	0	0	0	0	0	0	0	0	0	2.88942	0	0	17
Bra016002	0	0	0	0	0	0	0	0	0	0	3.03309	0	0	3.03309	0	3.03309	3.03309	3.03309	13
Bra020865	3.09006	0	0	0	0	3.09006	0	0	0	0	0	0	0	0	0	3.09006	3.09006	3.09006	13
Bra031798	0	0	0	0	0	0	3.69542	0	0	0	0	0	0	3.69542	3.69542	3.69542	3.69542	3.69542	12
Bra002355	0	0	0	0	0	0	0	0	0	0	0	0	0	3.76795	0	3.76795	3.76795	3.76795	14
Bra000203	0	0	0	0	4.53342	0	4.53342	0	0	0	4.53342	4.53342	0	4.53342	0	4.53342	0	4.53342	11
Bra018065	4.9916	0	0	0	0	0	0	4.9916	4.9916	0	4.9916	4.9916	4.9916	0	0	4.9916	4.9916	4.9916	9
Bra020071	0	0	0	0	0	0	0	0	0	0	0	0	0	0	0	7.06989	0	0	17

## Sheet: osmotic
Gene_ID	osmoticstress
Bra012949	-5.25722
Bra007334	-4.89487
Bra030496	-4.80101
Bra004503	-4.70998
Bra040169	-4.44398
Bra029990	-4.248
Bra001752	-4.12117
Bra010096	-4.01894
Bra010035	-3.87597
Bra017373	-3.79771
Bra003969	-3.79585
Bra014527	-3.63281
Bra001907	-3.59904
Bra029778	-3.45677
Bra016230	-3.32419
Bra005751	-3.2615
Bra008920	-3.25852
Bra021558	-3.23576
Bra033257	-3.17061
Bra018383	-3.16391
Bra032622	-3.14596
Bra036653	-3.02422
Bra023278	-3.0184
Bra007637	-2.92031
Bra029259	-2.91238
Bra031435	-2.91021
Bra005351	-2.88273
Bra009735	-2.85758
Bra016164	-2.83053
Bra030526	-2.74352
Bra037386	-2.73573
Bra010922	-2.68262
Bra018183	-2.62535
Bra032474	-2.61237
Bra029712	-2.6051
Bra011749	-2.59879
Bra009783	-2.4971
Bra018216	-2.47306
Bra010879	-2.46722
Bra006692	-2.46053
Bra014666	-2.45982
Bra037845	-2.45345
Bra025280	-2.44465
Bra002110	-2.33733
Bra038281	-2.33328
Bra029258	-2.333
Bra004155	-2.29971
Bra009229	-2.29491
Bra036140	-2.21262
Bra001320	-2.21194
Bra025914	-2.14724
Bra018850	-2.08524
Bra038111	-2.05191
Bra024992	-2.02486
Bra019570	2.04321
Bra029309	2.07297
Bra039693	2.12154
Bra023515	2.13565
Bra031349	2.18045
Bra026062	2.19699
Bra010706	2.22674
Bra006749	2.31478
Bra008850	2.37544
Bra022161	2.39904
Bra006195	2.57512
Bra023450	2.70823
Bra031903	2.72632
Bra013714	2.77657
Bra016002	3.03309
Bra020865	3.09006
Bra033549	3.14363
Bra031210	3.15573
Bra006809	3.29961
Bra013426	3.36947
Bra000775	3.59572
Bra031798	3.69542
Bra002355	3.76795
Bra000876	4.31664
Bra004736	4.38428
Bra000203	4.53342
Bra001122	4.72944
Bra018065	4.9916
Bra004840	6.71069

## Sheet: photosynthesis
Gene_ID	Photosyn.
Bra025297	-5.0703
Bra033022	-3.45059
Bra002999	-3.19806
Bra005424	-2.78445
Bra030182	-2.60892
Bra008216	-2.445
Bra027083	-2.2298
Bra010807	-2.106
Bra000708	-2.05672
Bra026099	-2.02632

## Sheet: light
Gene_ID	Light
Bra012784	-5.60002
Bra012949	-5.25722
Bra021965	-5.24685
Bra025297	-5.0703
Bra030496	-4.80101
Bra004503	-4.70998
Bra015922	-4.3701
Bra033324	-4.35391
Bra000557	-4.23182
Bra031255	-4.12096
Bra024900	-4.05021
Bra004507	-3.88147
Bra002283	-3.7908
Bra003670	-3.6863
Bra022225	-3.66639
Bra014527	-3.63281
Bra012828	-3.62574
Bra038538	-3.48934
Bra029778	-3.45677
Bra033022	-3.45059
Bra023857	-3.40103
Bra016230	-3.32419
Bra040158	-3.27001
Bra002999	-3.19806
Bra019058	-3.17663
Bra018383	-3.16391
Bra018477	-3.13477
Bra018249	-3.05805
Bra022805	-3.00126
Bra021259	-2.95115
Bra019711	-2.89085
Bra009735	-2.85758
Bra026485	-2.84234
Bra038734	-2.83406
Bra025439	-2.82935
Bra034424	-2.79607
Bra005424	-2.78445
Bra022191	-2.72452
Bra012972	-2.70884
Bra010922	-2.68262
Bra037747	-2.64858
Bra030182	-2.60892
Bra006692	-2.46053
Bra028759	-2.36305
Bra018907	-2.35787
Bra031180	-2.34881
Bra038281	-2.33328
Bra039937	-2.29305
Bra019466	-2.25728
Bra027083	-2.2298
Bra014674	-2.22396
Bra026317	-2.16347
Bra033588	-2.16198
Bra039338	-2.11198
Bra010807	-2.106
Bra005709	-2.06584
Bra000708	-2.05672
Bra007843	-2.05169
Bra024339	-2.04062
Bra015866	-2.03766
Bra023317	-2.02839
Bra026099	-2.02632
Bra017218	2.0415
Bra011332	2.04377
Bra034941	2.08507
Bra025832	2.10451
Bra012299	2.43986
Bra031619	2.50452
Bra026572	2.51493
Bra026461	2.5276
Bra016886	2.68306
Bra007864	2.92623
Bra026991	3.13716
Bra039194	3.14088
Bra001761	3.24396
Bra016635	3.25939
Bra006085	3.3144
Bra019118	3.32227
Bra004718	3.44241
Bra038832	3.73241
Bra010713	4.30981
Bra034595	4.66053
Bra001264	5.74276
Bra033648	5.79749
Bra017035	6.91239

## Sheet: GA
Gene_ID	Gibberelllin
Bra030496	-4.80101
Bra004503	-4.70998
Bra029990	-4.248
Bra003969	-3.79585
Bra029778	-3.45677
Bra005751	-3.2615
Bra036653	-3.02422
Bra016164	-2.83053
Bra036183	-2.23092
Bra023317	-2.02839
Bra017218	2.0415
Bra023515	2.13565
Bra004946	2.35462
Bra026461	2.5276
Bra007378	2.58764
Bra028724	2.61838
Bra021903	2.63438
Bra017759	2.83117
Bra006694	2.83967
Bra016900	2.85219
Bra007864	2.92623
Bra029311	3.0232
Bra019118	3.32227
Bra012532	4.68708

## Sheet: water depri.
Gene_ID	Water depri.
Bra016763	-6.06985
Bra021965	-5.24685
Bra025297	-5.0703
Bra040169	-4.44398
Bra024539	-4.34445
Bra029990	-4.248
Bra001752	-4.12117
Bra001907	-3.59904
Bra033022	-3.45059
Bra029145	-3.34134
Bra007603	-3.2367
Bra021558	-3.23576
Bra036653	-3.02422
Bra023278	-3.0184
Bra007637	-2.92031
Bra005351	-2.88273
Bra015048	-2.84921
Bra006709	-2.82466
Bra017278	-2.75242
Bra010922	-2.68262
Bra014426	-2.67258
Bra018183	-2.62535
Bra032474	-2.61237
Bra023103	-2.48648
Bra014666	-2.45982
Bra012803	-2.4581
Bra034845	-2.45719
Bra026353	-2.36717
Bra028759	-2.36305
Bra015025	-2.36115
Bra038281	-2.33328
Bra029258	-2.333
Bra022179	-2.23448
Bra018964	-2.1468
Bra006997	-2.09094
Bra002594	-2.02549
Bra036901	2.01241
Bra031349	2.18045
Bra026062	2.19699
Bra006749	2.31478
Bra021113	2.38795
Bra006195	2.57512
Bra013009	2.68023
Bra026124	2.83779
Bra026991	3.13716
Bra031210	3.15573
Bra000203	4.53342

[truncated: 10 more sheets: ethylene, ABA, circadian, glucosinolate, SA, JA, defense, cellstress, oxidative, salt]
