# Supplementary material for: BrPP5.2 Overexpression Confers Heat Shock Tolerance in Transgenic Brassica rapa through Inherent Chaperone Activity, Induced Glucosinolate Biosynthesis, and Differential Regulation of Abiotic Stress Response Genes
Source: Int J Mol Sci. 2021 Jun 16;22(12):6437. doi: 10.3390/ijms22126437 (PMC8234546; doi:10.3390/ijms22126437)
Supplement: Supplementary file 1 [file ijms-22-06437-s001.zip › Captions-Supplemental.pdf]

Supplemental Figure S1: The root phenotypes of BrPP5OX lines in the presence of 350mM Mannitol with 0.3μM of okadaic acid and without okadaic acid

Supplemental Table: The list of primers used for qRT-PCR based expression profiling of temperature-stimulus response genes

Supplemental Data: List of differentially expressed genes identified in BrPP5OX transgenic *B. rapa* lines in comparison with wild type lines. This list includes several key features of differential gene expression data, including the gene IDs, their annotation, expression in logFC, p-values, FDR values derived from edgeR and DEseq2 tools

Supplemental Data: The UPLC based quantification results of individual glucosinolate content in transgenic and wild type lines under optima and high-temperature stressed conditions.

Supplemental Data: The representative chromatogram of standard glucosinolate mixtures and chromatograms of each lines obtained from UPLC analysis of Glucosinolate measurement in *Brassica rapa*.

Supplemental Data: The reference Glucosinolate Biosynthesis pathway mapped (indicated with blue color) with differentially expressed genes of *B. rapa*.

Supplemental Data: List of genes known to be involved in abiotic stress, hormone response and energy metabolism derived from differential gene expression data.

Supplemental Data: The chromosomal distribution of significant DEGs

Supplemental Data: The GO terms based functional enrichment of key DEGs with up- and down-regulation by gProfiler tool.

Supplemental Data: The list of brassica- and transgenic-specific DEGs, expression pattern, and some of their possible roles in *Brassica rapa*.
