# Supplementary material for: BrPP5.2 Overexpression Confers Heat Shock Tolerance in Transgenic Brassica rapa through Inherent Chaperone Activity, Induced Glucosinolate Biosynthesis, and Differential Regulation of Abiotic Stress Response Genes
Source: Int J Mol Sci. 2021 Jun 16;22(12):6437. doi: 10.3390/ijms22126437 (PMC8234546; doi:10.3390/ijms22126437)
Supplement: Supplementary file 1 [file ijms-22-06437-s001.zip › Gene and TFs known.xlsx]

## Sheet: common bw deseq and edge FC2
Gene_ID	Gene_ID	TAIR_ID	Gene_Symbol	Gene_Info	logFC	logCPM	LR	PValue	FDR	TMMValue_DB_1_S3	TMMValue_DB_2_S4	TMMValue_DB_3_S5	TMMValue_PP5_1_S12	TMMValue_PP5_2_S13	TMMValue_PP5_3_S14	RawCount_DB_1_S3	RawCount_DB_2_S4	RawCount_DB_3_S5	RawCount_PP5_1_S12	RawCount_PP5_2_S13	RawCount_PP5_3_S14	Gene_ID		Family-TF	Auxin	Glucosinolate genes	Anthocyanin genes	Flower genes	Resistence gene
Bra011135	Bra011135.1	AT4G29780	-	unknown protein	-3.83856	5.64109	6182.73	0	0	6.56958	6.57529	6.61672	2.6181	2.82626	2.81072	2552	1922	1961	129	202	156	Bra011135	1	-	-	-	-	-	-
Bra025713	Bra025713.1	AT1G19180	JAZ1,TIFY10A	JAZ1 (JASMONATE-ZIM-DOMAIN PROTEIN 1);protein binding	-2.21268	5.13282	1959.71	0	0	5.85013	5.86248	5.94571	3.62453	3.71833	3.67714	1549	1172	1231	261	377	286	Bra025713	1	ZIM	-	-	-	-	-
Bra031065	Bra031065.1	AT1G74950	JAZ2,TIFY10B	TIFY10B	-3.48142	6.65433	8690.03	0	0	7.57597	7.51607	7.561	4.02047	4.03762	4.18327	5129	3691	3775	344	471	407	Bra031065	1	ZIM	-	-	-	-	-
Bra010794	Bra010794.1	AT1G30135	JAZ8,TIFY5A	JAZ8 (JASMONATE-ZIM-DOMAIN PROTEIN 8)	-2.55337	2.22427	341.817	2.56557e-76	3.00708e-75	2.97407	3.02958	2.95158	0.666788	0.62543	-0.0374006	209	163	153	32	42	20	Bra010794	1	ZIM	-	-	-	-	-
Bra032362	Bra032362.1	AT1G30135	JAZ8,TIFY5A	JAZ8 (JASMONATE-ZIM-DOMAIN PROTEIN 8)	-2.86185	0.903035	169.318	1.04239e-38	7.86574e-38	1.64849	1.85013	1.71629	-0.623697	-0.897551	-1.33326	82	71	64	12	13	7	Bra032362	1	ZIM	-	-	-	-	-
Bra039038	Bra039038.1	AT3G28920	AtHB34	AtHB34 (ARABIDOPSIS THALIANA HOMEOBOX PROTEIN 34);DNA binding / transcription factor	-3.09155	4.69102	2306.18	0	0	5.60655	5.60331	5.49941	2.41729	2.6056	2.4375	1308	979	903	112	173	120	Bra039038	1	zf-HD	-	-	-	-	-
Bra027455	Bra027455.1	AT5G42780	AtHB27	AtHB27 (ARABIDOPSIS THALIANA HOMEOBOX PROTEIN 27);DNA binding / transcription factor	-2.95765	2.64614	546.257	8.20828e-121	1.33135e-119	3.60977	3.46476	3.40408	0.666788	0.416362	0.790481	326	221	210	32	36	37	Bra027455	1	zf-HD	-	-	-	-	-
Bra031051	Bra031051.1	AT1G18835	MIF3	MIF3 (MINI ZINC FINGER)	-3.78207	-1.66432	31.4495	2.04698e-08	6.78796e-08	-0.721478	-0.781944	-1.37374	-3.54139	-3.05201	-2.93993	14	10	6	0	1	1	Bra031051	1	zf-HD	-	-	-	-	-
Bra025362	Bra025362.1	AT3G28917	MIF2	MIF2 (MINI ZINC FINGER 2);DNA binding	-6.02686	-1.97543	31.0187	2.55553e-08	8.42833e-08	-1.69433	-0.66394	-1.37374	-3.54139	-3.54139	-3.54139	6	11	6	0	0	0	Bra025362	1	zf-HD	-	-	-	-	-
Bra003588	Bra003588.1	AT1G80840	WRKY40,ATWRKY40	WRKY40;transcription factor	-4.51987	3.4528	1658.68	0	0	4.44391	4.38578	4.4813	0.0994213	0.171779	-0.249598	583	420	445	21	30	17	Bra003588	1	WRKY	-	-	-	-	-
Bra008435	Bra008435.1	AT1G80840	WRKY40,ATWRKY40	WRKY40;transcription factor	-3.89366	7.01877	14283.8	0	0	7.9641	7.96329	7.94946	4.03706	4.14899	4.00314	6713	5033	4942	348	509	359	Bra008435	1	WRKY	-	-	-	-	-
Bra011282	Bra011282.1	AT4G31550	WRKY11,ATWRKY11	WRKY11;calmodulin binding / transcription factor	-2.13201	5.69219	2179.78	0	0	6.49303	6.43024	6.37219	4.35747	4.32158	4.24203	2420	1738	1655	435	574	424	Bra011282	1	WRKY	-	-	-	-	-
Bra014426	Bra014426.1	AT2G46400	WRKY46,ATWRKY46	WRKY46;transcription factor	-2.67258	4.90191	2556.16	0	0	5.72893	5.72051	5.73705	3.01139	3.06022	3.12911	1424	1062	1065	170	238	195	Bra014426	1	WRKY	-	-	-	-	-
Bra023998	Bra023998.1	AT4G31550	WRKY11,ATWRKY11	WRKY11;calmodulin binding / transcription factor	-2.3913	6.54409	5771.09	0	0	7.31267	7.3379	7.31639	4.93711	4.95859	4.89757	4273	3262	3186	651	894	669	Bra023998	1	WRKY	-	-	-	-	-
Bra035148	Bra035148.1	AT1G80840	WRKY40,ATWRKY40	WRKY40;transcription factor	-3.50076	6.48268	8545.37	0	0	7.41523	7.36462	7.40673	3.80973	3.94967	3.92933	4588	3323	3392	297	443	341	Bra035148	1	WRKY	-	-	-	-	-
Bra037368	Bra037368.1	AT4G01250	WRKY22,AtWRKY22	WRKY22;transcription factor	-2.34425	5.01257	1891.67	0	0	5.71368	5.758	5.68892	3.13213	3.4101	3.47295	1409	1090	1030	185	304	248	Bra037368	1	WRKY	-	-	-	-	-
Bra020197	Bra020197.1	AT5G22570	WRKY38,ATWRKY38	WRKY38;transcription factor	2.98463	3.87593	1338.17	5.71977e-293	1.93972e-291	1.7316	1.70413	1.67171	4.65487	4.65921	4.6622	87	64	62	535	726	568	Bra020197	1	WRKY	-	-	-	-	-
Bra036315	Bra036315.1	AT4G01720	WRKY47,AtWRKY47	WRKY47;transcription factor	2.31528	4.55156	1258.56	1.14551e-275	3.69094e-274	2.69637	2.92987	3.04193	5.14273	5.2064	5.24553	172	152	163	751	1062	852	Bra036315	1	WRKY	-	-	-	-	-
Bra010032	Bra010032.1	AT5G49520	WRKY48,ATWRKY48	WRKY48;transcription factor	-2.21005	3.09642	529.682	3.31308e-117	5.24206e-116	3.81428	3.76748	3.95754	1.69152	1.5847	1.73508	376	273	309	67	84	73	Bra010032	1	WRKY	-	-	-	-	-
Bra000203	Bra000203.1	AT2G40750	WRKY54,ATWRKY54	WRKY54;transcription factor	4.53342	1.79358	446.067	5.1768e-99	7.2871e-98	-2.34049	-1.38344	-1.04129	2.70372	2.6056	2.61538	3	6	8	137	173	136	Bra000203	1	WRKY	-	-	-	-	-
Bra039147	Bra039147.1	AT3G01085	-	protein kinase family protein	4.45533	1.84896	424.274	2.86524e-94	3.88282e-93	-1.87932	-1.58322	-0.771293	2.7447	2.72393	2.5068	5	5	10	141	188	126	Bra039147	1	WRKY	-	-	-	-	-
Bra023211	Bra023211.1	AT5G01900	WRKY62,ATWRKY62	WRKY62;transcription factor	2.74276	1.52404	229.72	6.86163e-52	6.25244e-51	-0.0316155	-0.781944	-0.442432	2.10744	2.27434	2.38938	24	10	13	90	137	116	Bra023211	1	WRKY	-	-	-	-	-
Bra030178	Bra030178.1	AT1G29860	WRKY71,ATWRKY71	WRKY71;transcription factor	3.29361	1.18494	207.834	4.07701e-47	3.49145e-46	-1.12741	-1.38344	-0.771293	2.02667	2.11019	1.73508	10	6	10	85	122	73	Bra030178	1	WRKY	-	-	-	-	-
Bra004586	Bra004586.1	AT2G40750	WRKY54,ATWRKY54	WRKY54;transcription factor	3.95911	0.613512	180.48	3.80692e-41	2.9833e-40	-1.69433	-2.09175	-2.42749	1.38952	1.40741	1.52844	6	3	2	54	74	63	Bra004586	1	WRKY	-	-	-	-	-
Bra024328	Bra024328.1	AT5G64810	WRKY51,ATWRKY51	WRKY51;transcription factor	2.03124	1.78004	179.312	6.8489e-41	5.33836e-40	0.510498	0.107389	0.665301	2.4299	2.43102	2.38938	36	20	30	113	153	116	Bra024328	1	WRKY	-	-	-	-	-
Bra008858	Bra008858.1	AT5G13080	WRKY75,ATWRKY75	WRKY75;transcription factor	3.70237	0.380717	127.182	1.69492e-29	1.09068e-28	-1.87932	-2.43419	-1.80647	1.4403	0.918022	1.23365	5	2	4	56	52	51	Bra008858	1	WRKY	-	-	-	-	-
Bra006178	Bra006178.1	AT5G13080	WRKY75,ATWRKY75	WRKY75;transcription factor	3.53692	0.335059	121.209	3.43924e-28	2.15988e-27	-2.09155	-1.81519	-1.80647	1.46503	0.995361	1.02902	4	4	4	57	55	44	Bra006178	1	WRKY	-	-	-	-	-
Bra002421	Bra002421.1	AT5G22570	WRKY38,ATWRKY38	WRKY38;transcription factor	2.48167	0.388266	88.7388	4.50545e-21	2.39547e-20	-1.69433	-0.781944	-1.04129	0.902338	1.04471	1.26065	6	10	8	38	57	52	Bra002421	1	WRKY	-	-	-	-	-
Bra008719	Bra008719.1	AT5G15130	WRKY72,ATWRKY72	WRKY72;transcription factor	-3.02078	-0.822743	39.1798	3.86513e-10	1.39666e-09	0.022203	0.653492	-0.653145	-1.86989	-2.39635	-2.93993	25	30	11	4	3	1	Bra008719	1	WRKY	-	-	-	-	-
Bra023505	Bra023505.1	AT5G15130	WRKY72,ATWRKY72	WRKY72;transcription factor	-3.61591	-1.39282	38.0334	6.9544e-10	2.48515e-09	-0.812762	-0.66394	-0.347594	-2.91251	-3.05201	-2.93993	13	11	14	1	1	1	Bra023505	1	WRKY	-	-	-	-	-
Bra000202	Bra000202.1	AT2G40740	WRKY55,ATWRKY55	WRKY55;transcription factor	2.10853	-1.40295	17.1447	3.46367e-05	9.2788e-05	-2.34049	-2.09175	-2.8795	-0.849043	-0.641935	-1.18018	3	3	1	10	16	8	Bra000202	1	WRKY	-	-	-	-	-
Bra029491	Bra029491.1	AT4G04450	WRKY42,AtWRKY42	WRKY42;transcription factor	-2.34973	-1.72883	16.167	5.79943e-05	0.000152214	-1.24964	-1.05157	-1.04129	-3.54139	-2.39635	-2.51671	9	8	8	0	3	2	Bra029491	1	WRKY	-	-	-	-	-
Bra020196	Bra020196.1	AT5G22570	WRKY38,ATWRKY38	WRKY38;transcription factor	3.28755	-2.38537	12.298	0.000453456	0.0011013	-3.54139	-2.88408	-3.54139	-1.64151	-1.76611	-2.1899	0	1	0	5	6	3	Bra020196	1	WRKY	-	-	-	-	-
Bra000046	Bra000046.1	AT2G38250	-	DNA-binding protein-related	2.52385	0.306096	83.7357	5.65552e-20	2.91294e-19	-1.3832	-0.910466	-1.57394	0.708815	1.13861	1.06009	8	9	5	33	61	45	Bra000046	1	trihelix	-	-	-	-	-
Bra005688	Bra005688.1	AT5G01380	-	transcription factor	-2.21753	0.174982	58.6612	1.87295e-14	8.12491e-14	0.874659	0.783817	0.753519	-1.271	-0.565891	-1.92362	47	33	32	7	17	4	Bra005688	1	trihelix	-	-	-	-	-
Bra008286	Bra008286.1	AT1G76890	GT2,AT-GT2	GT2;transcription factor	2.90186	-0.446703	37.3896	9.67385e-10	3.43703e-09	-3.02241	-2.09175	-1.19796	0.0994213	0.559051	-0.327883	1	3	7	21	40	16	Bra008286	1	trihelix	-	-	-	-	-
Bra005984	Bra005984.1	AT5G08330	-	TCP family transcription factor,putative	-2.32912	6.49681	4566.03	0	0	7.25202	7.30346	7.23732	4.94812	4.86553	5.01323	4097	3185	3016	656	838	725	Bra005984	1	TCP	-	-	-	-	-
Bra021586	Bra021586.1	AT1G53230	TCP3	TCP3;transcription factor	3.43999	2.5954	643.32	6.33783e-142	1.16652e-140	0.0740859	0.234398	-0.095582	3.48033	3.36224	3.41404	26	22	17	236	294	238	Bra021586	1	TCP	-	-	-	-	-
Bra017839	Bra017839.1	AT4G37610	BT5	BT5 (BTB AND TAZ DOMAIN PROTEIN 5);protein binding / transcription regulator	-3.48029	7.64428	11486	0	0	8.49646	8.44033	8.46307	4.94592	4.9618	5.11291	9710	7006	7056	655	896	777	Bra017839	1	TAZ	-	-	-	-	-
Bra015731	Bra015731.1	AT1G76590	-	zinc-binding family protein	2.29549	4.1136	988.108	6.90536e-217	1.79561e-215	2.49222	2.38987	2.69731	4.72054	4.83605	4.8517	149	104	128	560	821	648	Bra015731	1	PLATZ	-	-	-	-	-
Bra012263	Bra012263.1	AT1G21000	-	zinc-binding family protein	3.99934	2.75354	663.404	2.71675e-146	5.11133e-145	-0.721478	0.351125	-0.347594	3.43723	3.48798	3.62614	14	24	14	229	321	276	Bra012263	1	PLATZ	-	-	-	-	-
Bra014478	Bra014478.1	AT3G60670	-	zinc-binding protein,putative	-2.42219	0.453103	82.3597	1.13444e-19	5.79027e-19	0.932019	1.4917	1.22398	-0.976457	-0.722211	-1.50453	49	55	45	9	15	6	Bra014478	1	PLATZ	-	-	-	-	-
Bra019757	Bra019757.1	AT1G77250	-	PHD finger family protein	-5.88841	-2.07974	30.2781	3.74329e-08	1.22523e-07	-1.01473	-1.81519	-1.37374	-3.54139	-3.54139	-3.54139	11	4	6	0	0	0	Bra019757	1	PHD	-	-	-	-	-
Bra021575	Bra021575.1	AT3G14740	-	PHD finger family protein	-3.485	-2.33699	14.3785	0.000149496	0.000379191	-2.09155	-1.38344	-1.80647	-2.91251	-3.54139	-3.54139	4	6	4	1	0	0	Bra021575	1	PHD	-	-	-	-	-
Bra003396	Bra003396.1	AT3G59960	ASHH4,SDG24	ASHH4 (HISTONE-LYSINE N-METHYLTRANSFERASE ASHH4);histone-lysine N-methyltransferase	-3.85737	-1.21493	47.3868	5.82727e-12	2.29033e-11	-0.40504	-0.358712	-0.442432	-2.47601	-3.54139	-2.93993	18	14	13	2	0	1	Bra003396	1	PcG	-	-	-	-	-
Bra024809	Bra024809.1	AT2G02740	ATWHY3,PTAC11,WHY3	WHY3 (WHIRLY 3);DNA binding	-2.9119	3.80396	1102.26	1.06465e-241	3.02767e-240	4.54619	4.54129	4.59312	2.15382	1.5847	1.5722	626	468	481	93	84	65	Bra024809	1	PBF-2-like	-	-	-	-	-
Bra026359	Bra026359.1	AT4G27330	SPL,NZZ	SPL (SPOROCYTELESS);protein binding / transcription factor	-4.69843	-2.73534	13.0494	0.00030339	0.000747861	-1.87932	-2.88408	-2.08382	-3.54139	-3.54139	-3.54139	5	1	3	0	0	0	Bra026359	1	NZZ	-	-	-	-	-
Bra009774	Bra009774.1	AT5G24590	ANAC091,TIP	TIP (TCV-INTERACTING PROTEIN);transcription coactivator/ transcription factor	-2.29421	6.90876	5413.12	0	0	7.64433	7.70921	7.709	5.38879	5.41781	5.37318	5378	4220	4183	891	1230	931	Bra009774	1	NAC	-	-	-	-	-
Bra013034	Bra013034.1	AT2G17040	anac036	anac036 (Arabidopsis NAC domain containing protein 36);transcription factor	-2.54667	6.17105	4219.76	0	0	7.01876	6.93105	6.9639	4.40618	4.40898	4.48464	3485	2460	2495	450	610	502	Bra013034	1	NAC	-	-	-	-	-
Bra017980	Bra017980.1	AT3G49530	anac062	anac062 (Arabidopsis NAC domain containing protein 62);transcription factor	-2.70081	6.83291	7237	0	0	7.61289	7.62151	7.64845	4.91484	4.8775	5.01917	5262	3971	4011	641	845	728	Bra017980	1	NAC	-	-	-	-	-
Bra019599	Bra019599.1	AT3G49530	anac062	anac062 (Arabidopsis NAC domain containing protein 62);transcription factor	-3.10933	5.57786	4965.56	0	0	6.44765	6.45165	6.47795	3.37334	3.32777	3.38366	2345	1764	1781	219	287	233	Bra019599	1	NAC	-	-	-	-	-
Bra020188	Bra020188.1	AT5G22380	anac090	anac090 (Arabidopsis NAC domain containing protein 90);transcription factor	-2.78328	4.76698	2308.1	0	0	5.57651	5.59741	5.66352	2.96011	2.76868	2.81072	1281	975	1012	164	194	156	Bra020188	1	NAC	-	-	-	-	-
Bra033239	Bra033239.1	AT1G01720	ATAF1,ANAC002	ATAF1;transcription activator/ transcription factor	-2.54767	5.03325	2553.36	0	0	5.82574	5.88202	5.81983	3.17773	3.35247	3.35262	1523	1188	1128	191	292	228	Bra033239	1	NAC	-	-	-	-	-
Bra026353	Bra026353.1	AT4G27410	RD26,ANAC072	RD26 (RESPONSIVE TO DESICCATION 26);transcription activator/ transcription factor	-2.36717	4.17514	1006.76	6.08445e-221	1.61097e-219	4.9759	5.05948	4.86226	2.5733	2.70871	2.55121	844	671	580	125	186	130	Bra026353	1	NAC	-	-	-	-	-
Bra000282	Bra000282.1	AT2G43000	anac042	anac042 (Arabidopsis NAC domain containing protein 42);transcription factor	4.29935	3.05314	949.926	1.37689e-208	3.45028e-207	-0.635628	-0.106919	0.0508783	3.84313	4.02538	3.8692	15	17	19	304	467	327	Bra000282	1	NAC	-	-	-	-	-
Bra021856	Bra021856.1	AT2G33480	ANAC041	ANAC041 (Arabidopsis NAC domain containing protein 41);transcription factor	3.80505	3.07891	826.772	8.15772e-182	1.81409e-180	0.0740859	0.783817	-0.258608	3.82891	3.86977	3.76462	26	33	15	301	419	304	Bra021856	1	NAC	-	-	-	-	-
Bra019442	Bra019442.1	AT3G44350	anac061	anac061 (Arabidopsis NAC domain containing protein 61);transcription factor	-2.13646	3.71397	578.997	6.19721e-128	1.05169e-126	4.66302	4.4362	4.46179	2.37875	2.5034	2.26155	679	435	439	109	161	106	Bra019442	1	NAC	-	-	-	-	-
Bra037743	Bra037743.1	AT2G43000	anac042	anac042 (Arabidopsis NAC domain containing protein 42);transcription factor	2.49646	2.98786	560.359	7.02394e-124	1.16337e-122	1.23521	1.30172	1.22398	3.76062	3.62001	3.76462	61	48	45	287	352	304	Bra037743	1	NAC	-	-	-	-	-
Bra004736	Bra004736.1	AT2G43000	anac042	anac042 (Arabidopsis NAC domain containing protein 42);transcription factor	4.38428	2.13864	524.35	4.78717e-116	7.52467e-115	-0.910214	-0.910466	-2.08382	3.07704	2.86111	3.02272	12	9	3	178	207	181	Bra004736	1	NAC	-	-	-	-	-
Bra021114	Bra021114.1	AT3G15510	ATNAC2,ANAC056,NARS1	ATNAC2 (ARABIDOPSIS NAC DOMAIN CONTAINING PROTEIN 2);transcription factor	2.05864	1.29948	130.068	3.95887e-30	2.58017e-29	-0.0875197	0.234398	-0.258608	1.92337	1.84362	2.06111	23	22	15	79	101	92	Bra021114	1	NAC	-	-	-	-	-
Bra025012	Bra025012.1	AT5G46590	anac096	anac096 (Arabidopsis NAC domain containing protein 96);transcription factor	4.33605	-0.334299	96.5539	8.6846e-23	4.83276e-22	-3.54139	-2.43419	-2.42749	0.6235	0.48947	0.311463	0	2	2	31	38	26	Bra025012	1	NAC	-	-	-	-	-
Bra012960	Bra012960.1	AT5G61430	ANAC100,ATNAC5	ANAC100 (ARABIDOPSIS NAC DOMAIN CONTAINING PROTEIN 100);transcription factor	2.58583	-0.234404	59.1178	1.48512e-14	6.47078e-14	-1.5304	-2.09175	-1.80647	0.436058	0.52468	0.362208	7	3	4	27	39	27	Bra012960	1	NAC	-	-	-	-	-
Bra021113	Bra021113.1	AT3G15500	ATNAC3,ANAC055	ANAC055 (ARABIDOPSIS NAC DOMAIN CONTAINING PROTEIN 55);transcription factor	2.38795	-0.0602165	51.7817	6.20259e-13	2.53836e-12	-2.09155	-1.58322	-0.653145	0.532821	0.62543	0.411228	4	5	11	29	42	28	Bra021113	1	NAC	-	-	-	-	-
Bra031949	Bra031949.1	AT3G04070	anac047	anac047 (Arabidopsis NAC domain containing protein 47);transcription factor	3.12813	-0.67	47.0758	6.82935e-12	2.67746e-11	-1.87932	-2.88408	-2.8795	0.436058	0.0319469	-0.410661	5	1	1	27	27	15	Bra031949	1	NAC	-	-	-	-	-
Bra020182	Bra020182.1	AT5G22290	anac089	anac089 (Arabidopsis NAC domain containing protein 89);transcription factor	-3.83968	-1.24485	45.5198	1.51105e-11	5.82976e-11	-0.5546	0.0394298	-0.771293	-2.91251	-3.05201	-2.93993	16	19	10	1	1	1	Bra020182	1	NAC	-	-	-	-	-
Bra013272	Bra013272.1	AT4G17980	anac071	anac071 (Arabidopsis NAC domain containing protein 71);transcription factor	2.1573	-0.557639	35.1876	2.99423e-09	1.03782e-08	-2.09155	-1.38344	-1.80647	-0.103822	-0.069421	0.311463	4	6	4	18	25	26	Bra013272	1	NAC	-	-	-	-	-
Bra022319	Bra022319.1	AT3G18400	anac058	anac058 (Arabidopsis NAC domain containing protein 58);transcription factor	-2.88071	-1.42119	27.8792	1.29129e-07	4.09613e-07	-0.335699	-1.58322	-0.653145	-2.47601	-2.68725	-2.93993	19	5	11	2	2	1	Bra022319	1	NAC	-	-	-	-	-
Bra024194	Bra024194.1	AT4G28530	anac074	anac074 (Arabidopsis NAC domain containing protein 74);transcription factor	-2.12161	-0.961972	22.7388	1.85581e-06	5.48096e-06	0.264756	-0.66394	-0.543945	-1.44439	-2.68725	-1.92362	30	11	12	6	2	4	Bra024194	1	NAC	-	-	-	-	-
Bra030807	Bra030807.1	AT1G54330	ANAC020	ANAC020 (Arabidopsis NAC domain containing protein 20);transcription factor	-2.51018	-1.98151	12.5787	0.000390166	0.000952022	-1.24964	-1.58322	-1.57394	-2.14135	-3.05201	-3.54139	9	5	5	3	1	0	Bra030807	1	NAC	-	-	-	-	-
Bra001597	Bra001597.1	AT3G15510	ATNAC2,ANAC056,NARS1	ATNAC2 (ARABIDOPSIS NAC DOMAIN CONTAINING PROTEIN 2);transcription factor	-2.24093	-1.79399	12.0921	0.000506346	0.00122333	-1.24964	-1.20798	-1.37374	-3.54139	-1.94722	-2.93993	9	7	6	0	5	1	Bra001597	1	NAC	-	-	-	-	-
Bra003969	Bra003969.1	AT1G70000	-	DNA-binding family protein	-3.79585	5.45489	5692.17	0	0	6.37776	6.40262	6.41678	2.65081	2.66992	2.51803	2234	1705	1707	132	181	127	Bra003969	1	MYB-related	-	-	-	-	-
Bra004503	Bra004503.1	AT2G46830	CCA1	CCA1 (CIRCADIAN CLOCK ASSOCIATED 1);DNA binding / transcription activator/ transcription factor/ transcription repressor	-4.70998	4.26933	2861.04	0	0	5.29704	5.28349	5.19716	0.789365	0.62543	0.458637	1055	784	732	35	42	29	Bra004503	1	MYB-related	-	-	-	-	-
Bra016164	Bra016164.1	AT1G71030	ATMYBL2,MYBL2	MYBL2 (ARABIDOPSIS MYB-LIKE 2);DNA binding / transcription factor	-2.83053	6.92057	8562.35	0	0	7.77914	7.73998	7.76014	4.90809	4.98727	4.88895	5905	4311	4334	638	912	665	Bra016164	1	MYB-related	-	-	Anthocyanin genes	-	-
Bra030496	Bra030496.1	AT1G01060	LHY,LHY1	LHY (LATE ELONGATED HYPOCOTYL);DNA binding / transcription factor	-4.80101	3.10155	1357.18	4.23284e-297	1.45979e-295	4.10669	4.03512	4.14454	-0.731975	-0.359205	-0.591991	461	329	352	11	20	13	Bra030496	1	MYB-related	-	-	-	-	-
Bra025914	Bra025914.1	AT1G18330	EPR1	EPR1 (EARLY-PHYTOCHROME-RESPONSIVE1);DNA binding / transcription factor	-2.14724	3.99306	984.466	4.27326e-216	1.10906e-214	4.72924	4.71744	4.74879	2.63999	2.59735	2.56211	711	529	536	131	172	131	Bra025914	1	MYB-related	-	-	-	-	-
Bra033291	Bra033291.1	AT1G01060	LHY,LHY1	LHY (LATE ELONGATED HYPOCOTYL);DNA binding / transcription factor	-4.42204	3.0288	867.673	1.04603e-190	2.42416e-189	3.92438	3.94976	4.18079	-0.731975	0.171779	-0.410661	406	310	361	11	30	15	Bra033291	1	MYB-related	-	-	-	-	-
Bra029778	Bra029778.1	AT3G09600	-	myb family transcription factor	-3.45677	1.59476	335.954	4.85364e-75	5.63374e-74	2.60233	2.4695	2.34651	-1.44439	-0.565891	-0.591991	161	110	100	6	17	13	Bra029778	1	MYB-related	-	-	-	-	-
Bra008563	Bra008563.1	AT5G17300	-	myb family transcription factor	-5.40181	0.702038	267.212	4.59866e-60	4.61397e-59	1.6655	1.59	1.80154	-2.47601	-2.68725	-2.93993	83	59	68	2	2	1	Bra008563	1	MYB-related	-	-	-	-	-
Bra033257	Bra033257.1	AT1G01520	-	myb family transcription factor	-3.17061	0.880277	189.625	3.83794e-43	3.10198e-42	1.84047	1.65956	1.69417	-1.11622	-1.09719	-1.33326	94	62	63	8	11	7	Bra033257	1	MYB-related	-	-	-	-	-
Bra005751	Bra005751.1	AT5G02840	LCL1	LCL1 (LHY/CCA1-like 1);DNA binding / transcription factor	-3.2615	0.669279	168.297	1.74204e-38	1.31015e-37	1.57836	1.46605	1.55381	-1.44439	-1.09719	-1.92362	78	54	57	6	11	4	Bra005751	1	MYB-related	-	-	-	-	-
Bra024760	Bra024760.1	AT1G25340	MYB116	MYB116 (myb domain protein 116);DNA binding / transcription factor	4.83057	0.100154	144.853	2.31312e-33	1.59872e-32	-3.02241	-2.43419	-2.8795	0.865655	0.944265	1.02902	1	2	1	37	53	44	Bra024760	1	MYB-related	-	-	-	-	-
Bra034074	Bra034074.1	AT3G09600	-	myb family transcription factor	-3.00525	0.418588	111.99	3.59079e-26	2.15718e-25	1.09157	1.11623	1.37067	-1.86989	-0.897551	-1.92362	55	42	50	4	13	4	Bra034074	1	MYB-related	-	-	-	-	-
Bra023610	Bra023610.1	AT5G17300	-	myb family transcription factor	-3.02225	0.112452	89.6326	2.8676e-21	1.53387e-20	0.845101	1.18075	0.665301	-2.91251	-1.46049	-1.50453	46	44	30	1	8	6	Bra023610	1	MYB-related	-	-	-	-	-
Bra008169	Bra008169.1	AT1G74840	-	myb family transcription factor	2.0067	-1.32166	17.0375	3.66491e-05	9.79596e-05	-2.09155	-2.88408	-2.08382	-0.623697	-0.807219	-0.915531	4	1	3	12	14	10	Bra008169	1	MYB-related	-	-	-	-	-
Bra009044	Bra009044.1	AT5G10280	MYB92,ATMYB92,ATMYB64	ATMYB92 (MYB DOMAIN PROTEIN 92);DNA binding / transcription factor	-2.77079	-1.93972	16.5856	4.65029e-05	0.000123053	-1.3832	-1.38344	-1.19796	-2.47601	-3.54139	-2.93993	8	6	7	2	0	1	Bra009044	1	MYB-related	-	-	-	-	-
Bra008186	Bra008186.1	AT1G75250	ATRL6	ATRL6 (ARABIDOPSIS RAD-LIKE 6);transcription factor	2.67981	-2.24738	11.1926	0.000821241	0.00193831	-3.02241	-3.54139	-2.8795	-2.14135	-1.46049	-1.69891	1	0	1	3	8	5	Bra008186	1	MYB-related	-	-	-	-	-
Bra001907	Bra001907.1	AT3G23250	MYB15,ATY19,ATMYB15	MYB15 (MYB DOMAIN PROTEIN 15);DNA binding / transcription factor	-3.59904	4.20215	1958.62	0	0	5.05064	5.06804	5.15527	1.1664	1.6339	1.61468	889	675	711	46	87	67	Bra001907	1	MYB	-	-	-	-	-
Bra006694	Bra006694.1	AT5G59780	MYB59,ATMYB59-3	MYB59 (MYB DOMAIN PROTEIN 59);DNA binding / transcription factor	2.83967	4.4508	1876.6	0	0	2.33098	2.41691	2.46883	5.19356	5.23591	5.2234	133	106	109	778	1084	839	Bra006694	1	MYB	-	-	-	-	-
Bra011749	Bra011749.1	AT4G37260	MYB73,ATMYB73	MYB73 (MYB DOMAIN PROTEIN 73);DNA binding / transcription factor	-2.59879	6.54642	5800.38	0	0	7.34504	7.3793	7.32226	4.81736	4.67496	4.78352	4370	3357	3199	599	734	618	Bra011749	1	MYB	-	-	-	-	-
Bra012149	Bra012149.1	AT5G67300	ATMYBR1,ATMYB44,MYBR1	MYBR1 (MYB DOMAIN PROTEIN R1);DNA binding / transcription factor	-3.13442	7.47677	13125.1	0	0	8.33937	8.31681	8.3369	5.25867	5.21046	5.12029	8708	6431	6465	814	1065	781	Bra012149	1	MYB	-	-	-	-	-
Bra012910	Bra012910.1	AT3G50060	MYB77	MYB77;DNA binding / transcription factor	-3.99209	6.62945	11007.7	0	0	7.59607	7.58212	7.55411	3.64632	3.55763	3.59466	5201	3864	3757	265	337	270	Bra012910	1	MYB	-	-	-	-	-
Bra015912	Bra015912.1	AT1G74430	MYB95,ATMYB95,ATMYBCP66	MYB95 (myb domain protein 95);DNA binding / transcription factor	-2.41281	5.07104	1861.01	0	0	5.91913	5.95531	5.80184	3.5044	3.54911	3.43197	1625	1250	1114	240	335	241	Bra015912	1	MYB	-	-	-	-	-
Bra029990	Bra029990.1	AT5G67300	ATMYBR1,ATMYB44,MYBR1	MYBR1 (MYB DOMAIN PROTEIN R1);DNA binding / transcription factor	-4.248	5.71757	6407.66	0	0	6.72421	6.66259	6.6623	2.46711	2.39341	2.52918	2841	2042	2024	116	149	128	Bra029990	1	MYB	-	-	-	-	-
Bra036048	Bra036048.1	AT3G50060	MYB77	MYB77;DNA binding / transcription factor	-2.69977	6.32745	4123.26	0	0	7.08585	7.19049	7.13326	4.39978	4.38762	4.55994	3651	2945	2806	448	601	529	Bra036048	1	MYB	-	-	-	-	-
Bra029258	Bra029258.1	AT5G62470	MYB96	MYB96 (myb domain protein 96);DNA binding / transcription factor	-2.333	4.50204	1275.1	2.91893e-279	9.50287e-278	5.33076	5.20229	5.37977	3.07704	2.95444	2.96643	1080	741	831	178	221	174	Bra029258	1	MYB	-	-	-	-	-
Bra029311	Bra029311.1	AT5G61420	MYB28,HAG1	MYB28 (myb domain protein 28);DNA binding / transcription factor	3.0232	3.1942	817.411	8.8445e-180	1.94345e-178	1.06617	1.11623	0.795684	4.01629	4.02538	3.87795	54	42	33	343	467	329	Bra029311	1	MYB	-	Glucosinolate genes	-	-	-
Bra023515	Bra023515.1	AT5G15310	ATMYB16,ATMIXTA	ATMYB16 (MYB DOMAIN PROTEIN 16);DNA binding / transcription factor	2.13565	3.49848	647.092	9.58503e-143	1.76899e-141	1.87012	2.24653	2.06554	4.10551	4.16023	4.22157	96	94	82	365	513	418	Bra023515	1	MYB	-	-	-	-	-
Bra008705	Bra008705.1	AT5G15310	ATMYB16,ATMIXTA	ATMYB16 (MYB DOMAIN PROTEIN 16);DNA binding / transcription factor	2.08576	3.16744	446.615	3.93355e-99	5.54088e-98	1.79481	1.30172	1.84234	3.83367	3.76325	3.73605	91	48	70	302	389	298	Bra008705	1	MYB	-	-	-	-	-
Bra023742	Bra023742.1	AT3G23250	MYB15,ATY19,ATMYB15	MYB15 (MYB DOMAIN PROTEIN 15);DNA binding / transcription factor	-2.58401	2.67566	386.446	4.91683e-86	6.25282e-85	3.44714	3.32903	3.61894	0.6235	1.20523	0.862752	291	201	244	31	64	39	Bra023742	1	MYB	-	-	-	-	-
Bra008131	Bra008131.1	AT1G74080	ATMYB122,MYB122	MYB122 (MYB DOMAIN PROTEIN 122);DNA binding / transcription factor	4.45286	1.48398	371.762	7.73643e-83	9.56942e-82	-1.3832	-1.81519	-2.08382	2.35248	2.32516	2.37709	8	4	3	107	142	115	Bra008131	1	MYB	-	Glucosinolate genes	-	-	-
Bra012961	Bra012961.1	AT5G61420	MYB28,HAG1	MYB28 (myb domain protein 28);DNA binding / transcription factor	2.48407	2.6215	365.271	2.00362e-81	2.45299e-80	1.06617	0.941074	0.710084	3.41836	3.43807	3.17241	54	37	31	226	310	201	Bra012961	1	MYB	-	Glucosinolate genes	-	-	-
Bra004155	Bra004155.1	AT1G66230	MYB20,AtMYB20	MYB20 (myb domain protein 20);DNA binding / transcription factor	-2.29971	2.18309	232.136	2.03914e-52	1.86856e-51	3.04729	2.86264	2.75188	0.6235	0.944265	0.204282	220	145	133	31	53	24	Bra004155	1	MYB	-	-	-	-	-
Bra020428	Bra020428.1	AT5G57620	MYB36,AtMYB36	MYB36 (myb domain protein 36);DNA binding / transcription factor	-2.34979	-0.00573056	65.7742	5.05663e-16	2.32021e-15	0.687478	0.783817	0.710084	-1.86989	-1.09719	-1.33326	41	33	31	4	11	7	Bra020428	1	MYB	-	-	-	-	-
Bra017218	Bra017218.1	AT2G36890	RAX2,MYB38,ATMYB38,BIT1	RAX2 (REGULATOR OF AXILLARY MERISTEMS 2);DNA binding / transcription factor	2.0415	0.340151	64.1094	1.17696e-15	5.33427e-15	-1.01473	-0.910466	-0.771293	1.07295	0.944265	0.862752	11	9	10	43	53	39	Bra017218	1	MYB	-	-	-	-	-
Bra036145	Bra036145.1	AT5G49330	AtMYB111	AtMYB111 (myb domain protein 111);DNA binding / transcription factor	3.17378	-0.469321	58.6321	1.90091e-14	8.24005e-14	-2.09155	-2.88408	-2.08382	0.6235	0.0319469	0.14755	4	1	3	31	27	23	Bra036145	1	MYB	-	-	Anthocyanin genes	-	-
Bra035954	Bra035954.1	AT5G60890	ATMYB34,ATR1,MYB34	MYB34 (MYB DOMAIN PROTEIN 34);DNA binding / kinase/ transcription activator/ transcription factor	-2.93833	-0.69951	50.8387	1.00277e-12	4.07062e-12	-0.0875197	0.172291	0.118886	-1.64151	-2.68725	-2.51671	23	21	20	5	2	2	Bra035954	1	MYB	-	Glucosinolate genes	-	-	-
Bra030783	Bra030783.1	AT1G57560	AtMYB50	AtMYB50 (myb domain protein 50);DNA binding / transcription factor	4.50067	-1.61366	34.8637	3.5361e-09	1.22074e-08	-3.02241	-3.54139	-3.54139	-0.849043	-0.565891	-1.50453	1	0	0	10	17	6	Bra030783	1	MYB	-	-	-	-	-
Bra012641	Bra012641.1	AT4G17785	MYB39	MYB39 (myb domain protein 39);DNA binding / transcription factor	-4.46431	-1.76586	33.12	8.66416e-09	2.92896e-08	-0.721478	-1.58322	-0.899987	-3.54139	-3.54139	-2.93993	14	5	9	0	0	1	Bra012641	1	MYB	-	-	-	-	-
Bra021033	Bra021033.1	AT4G17785	MYB39	MYB39 (myb domain protein 39);DNA binding / transcription factor	-5.67153	-2.21437	26.2202	3.0462e-07	9.45216e-07	-1.24964	-1.38344	-2.08382	-3.54139	-3.54139	-3.54139	9	6	3	0	0	0	Bra021033	1	MYB	-	-	-	-	-
Bra040181	Bra040181.1	AT4G17785	MYB39	MYB39 (myb domain protein 39);DNA binding / transcription factor	-5.41292	-2.36179	21.4107	3.70695e-06	1.0711e-05	-1.5304	-1.38344	-2.42749	-3.54139	-3.54139	-3.54139	7	6	2	0	0	0	Bra040181	1	MYB	-	-	-	-	-
Bra028369	Bra028369.1	AT3G24310	MYB305,ATMYB71	MYB305 (myb domain protein 305);DNA binding / transcription factor	2.34026	-1.60318	16.7356	4.29662e-05	0.000114162	-2.64153	-3.54139	-2.08382	-0.731975	-1.32896	-1.0418	2	0	3	11	9	9	Bra028369	1	MYB	-	-	-	-	-
Bra006370	Bra006370.1	AT5G16770	AtMYB9	AtMYB9 (myb domain protein 9);DNA binding / transcription factor	-2.10395	-1.69603	14.0497	0.00017804	0.000448239	-1.01473	-1.20798	-1.19796	-2.14135	-2.68725	-2.93993	11	7	7	3	2	1	Bra006370	1	MYB	-	-	-	-	-
Bra013415	Bra013415.1	AT3G18100	MYB4R1,AtMYB4R1	MYB4R1 (myb domain protein 4R1);transcription factor	4.73582	-2.68176	12.9381	0.000321955	0.000791946	-3.54139	-3.54139	-3.54139	-1.86989	-2.15438	-2.51671	0	0	0	4	4	2	Bra013415	1	MYB	-	-	-	-	-
Bra039067	Bra039067.1	AT3G27810	ATMYB21,ATMYB3,MYB21	ATMYB21 (ARABIDOPSIS THALIANA MYB DOMAIN PROTEIN 21);DNA binding / transcription factor	-3.287	-2.48243	8.82392	0.00297307	0.00658875	-2.34049	-0.910466	-2.42749	-2.91251	-3.54139	-3.54139	3	9	2	1	0	0	Bra039067	1	MYB	-	-	-	-	-
Bra015048	Bra015048.1	AT3G24500	MBF1C,ATMBF1C	MBF1C (MULTIPROTEIN BRIDGING FACTOR 1C);DNA binding / transcription coactivator/ transcription factor	-2.84921	4.31154	1848.04	0	0	5.1217	5.21197	5.16736	2.25657	2.32516	2.41364	934	746	717	100	142	118	Bra015048	1	MBF1	-	-	-	-	-
Bra017376	Bra017376.1	AT2G03710	SEP4,AGL3	SEP4 (SEPALLATA 4);DNA binding / transcription factor	2.51441	-0.109377	56.2727	6.30838e-14	2.68003e-13	-1.69433	-2.43419	-0.899987	0.708815	0.48947	0.362208	6	2	9	33	38	27	Bra017376	1	MADS	-	-	-	-	-
Bra013891	Bra013891.1	AT5G51860	-	MADS-box protein (AGL72)	-4.94798	-2.61604	13.6615	0.000218894	0.000546295	-1.5304	-2.09175	-2.8795	-3.54139	-3.54139	-3.54139	7	3	1	0	0	0	Bra013891	1	MADS	-	-	-	Flower genes	-
Bra032814	Bra032814.1	AT1G24260	SEP3,AGL9	SEP3 (SEPALLATA3);DNA binding / protein binding / transcription factor	-3.37933	-2.41417	13.0365	0.000305478	0.000752782	-1.69433	-2.09175	-1.80647	-3.54139	-3.54139	-2.93993	6	3	4	0	0	1	Bra032814	1	MADS	-	-	-	-	-
Bra000696	Bra000696.1	AT4G09960	STK,AGL11	STK (SEEDSTICK);protein binding / transcription factor	-4.52855	-2.81475	11.2772	0.000784659	0.00185693	-1.87932	-2.43419	-2.8795	-3.54139	-3.54139	-3.54139	5	2	1	0	0	0	Bra000696	1	MADS	-	-	-	-	-
Bra017516	Bra017516.1	AT5G46910	-	transcription factor jumonji (jmj) family protein	-2.24465	4.75586	1756.97	0	0	5.51214	5.5138	5.48014	3.21466	3.20291	3.40196	1225	920	891	196	263	236	Bra017516	1	JUMONJI	-	-	-	-	-
Bra000557	Bra000557.1	AT2G26150	ATHSFA2,HSFA2	ATHSFA2;DNA binding / transcription factor	-4.23182	2.77296	977.608	1.32263e-214	3.40231e-213	3.74795	3.75164	3.72093	-0.522982	-0.359205	-0.175343	359	270	262	13	20	18	Bra000557	1	HSF	-	-	-	-	-
Bra029291	Bra029291.1	AT5G62020	AT-HSFB2A,HSFB2A	AT-HSFB2A;DNA binding / transcription factor	-4.91205	1.398	415.621	2.19072e-92	2.92972e-91	2.38333	2.29105	2.46883	-2.14135	-1.60522	-2.51671	138	97	109	3	7	2	Bra029291	1	HSF	-	-	-	-	-
Bra029292	Bra029292.1	AT5G62020	AT-HSFB2A,HSFB2A	AT-HSFB2A;DNA binding / transcription factor	-4.13052	1.61523	402.978	1.23781e-89	1.62022e-88	2.58455	2.56927	2.44253	-0.731975	-1.60522	-1.50453	159	118	107	11	7	6	Bra029292	1	HSF	-	-	-	-	-
Bra001885	Bra001885.1	AT3G22830	AT-HSFA6B,HSFA6B	AT-HSFA6B;DNA binding / transcription factor	-2.30077	0.852191	119.709	7.32721e-28	4.56352e-27	1.54198	1.76852	1.47815	-0.522982	-0.565891	-0.591991	76	67	54	13	17	13	Bra001885	1	HSF	-	-	-	-	-
Bra012828	Bra012828.1	AT3G51910	AT-HSFA7A,HSFA7A	AT-HSFA7A;DNA binding / transcription factor	-3.62574	0.220761	114.114	1.23011e-26	7.47153e-26	0.752608	1.27241	1.3425	-2.14135	-1.76611	-2.1899	43	47	49	3	6	3	Bra012828	1	HSF	-	-	-	-	-
Bra012829	Bra012829.1	AT3G51910	AT-HSFA7A,HSFA7A	AT-HSFA7A;DNA binding / transcription factor	-7.4594	-0.892953	92.4031	7.07028e-22	3.84351e-21	-0.0316155	0.107389	0.0508783	-3.54139	-3.54139	-3.54139	24	20	19	0	0	0	Bra012829	1	HSF	-	-	-	-	-
Bra033913	Bra033913.1	AT3G22830	AT-HSFA6B,HSFA6B	AT-HSFA6B;DNA binding / transcription factor	3.06089	-1.64392	23.3253	1.36792e-06	4.07553e-06	-3.02241	-2.43419	-3.54139	-1.271	-0.722211	-1.18018	1	2	0	7	15	8	Bra033913	1	HSF	-	-	-	-	-
Bra008593	Bra008593.1	AT5G16820	HSF3,HSFA1B,ATHSFA1B	HSF3 (HEAT SHOCK FACTOR 3);DNA binding / transcription factor	-2.17929	-2.03949	10.7182	0.00106086	0.00247531	-1.24964	-2.09175	-1.37374	-2.91251	-2.68725	-2.93993	9	3	6	1	2	1	Bra008593	1	HSF	-	-	-	-	-
Bra014417	Bra014417.1	AT3G61890	ATHB-12,ATHB12	ATHB-12 (ARABIDOPSIS THALIANA HOMEOBOX 12);transcription activator/ transcription factor	-2.2172	4.08678	695.789	2.46216e-153	4.79643e-152	4.73932	4.97333	5.03281	2.71408	2.73149	2.78305	716	632	653	138	189	153	Bra014417	1	HB	-	-	-	-	-
Bra007637	Bra007637.1	AT3G61890	ATHB-12,ATHB12	ATHB-12 (ARABIDOPSIS THALIANA HOMEOBOX 12);transcription activator/ transcription factor	-2.92031	0.908659	174.544	7.52811e-40	5.76725e-39	1.63127	1.83015	1.80154	-0.849043	-0.99392	-1.0418	81	70	68	10	12	9	Bra007637	1	HB	-	-	-	-	-
Bra008562	Bra008562.1	AT1G34650	HDG10	HDG10 (HOMEODOMAIN GLABROUS 10);DNA binding / transcription factor	-2.48634	1.25828	166.472	4.36354e-38	3.26423e-37	1.87012	2.05331	2.22833	-0.849043	-0.122907	-0.175343	96	82	92	10	24	18	Bra008562	1	HB	-	-	-	-	-
Bra003213	Bra003213.1	AT5G17320	HDG9	HDG9 (HOMEODOMAIN GLABROUS 9);DNA binding / sequence-specific DNA binding / transcription factor	3.57968	0.379044	123.407	1.13607e-28	7.19681e-28	-2.34049	-1.58322	-1.80647	0.789365	1.3299	1.31318	3	5	4	35	70	54	Bra003213	1	HB	-	-	-	-	-
Bra039135	Bra039135.1	AT3G01220	ATHB20	ATHB20 (ARABIDOPSIS THALIANA HOMEOBOX PROTEIN 20);DNA binding / transcription factor	-2.39099	-0.560699	43.0236	5.40822e-11	2.03164e-10	0.124168	0.107389	0.183831	-1.271	-2.15438	-2.1899	27	20	21	7	4	3	Bra039135	1	HB	-	-	-	-	-
Bra002564	Bra002564.1	AT5G59450	-	scarecrow-like transcription factor 11 (SCL11)	-2.33619	4.63608	1751.05	0	0	5.37925	5.44652	5.41231	3.05277	3.0781	3.12177	1117	878	850	175	241	194	Bra002564	1	GRAS	-	-	-	-	-
Bra026237	Bra026237.1	AT4G17230	SCL13	SCL13 (Scarecrow-like 13);transcription factor	-2.34756	6.22691	4715.99	0	0	6.98273	7.01859	6.99703	4.69984	4.61701	4.65713	3399	2614	2553	552	705	566	Bra026237	1	GRAS	-	-	-	-	-
Bra033813	Bra033813.1	AT3G46600	-	scarecrow transcription factor family protein	-2.10549	6.88094	4678.3	0	0	7.61918	7.6903	7.61939	5.56072	5.5433	5.49898	5285	4165	3931	1004	1342	1016	Bra033813	1	GRAS	-	-	-	-	-
Bra002894	Bra002894.1	AT4G08250	-	scarecrow transcription factor family protein	2.18421	-1.22621	20.5862	5.70064e-06	1.62014e-05	-2.34049	-2.88408	-1.80647	-0.103822	-0.722211	-1.0418	3	1	4	18	15	9	Bra002894	1	GRAS	-	-	-	-	-
Bra004330	Bra004330.1	AT1G68670	-	myb family transcription factor	-3.62253	5.35406	3152.25	0	0	6.23692	6.24371	6.129	2.73457	2.32516	2.66675	2026	1527	1398	140	142	141	Bra004330	1	GARP-G2-like	-	-	-	-	-
Bra033809	Bra033809.1	AT5G59570	-	myb family transcription factor	3.67006	4.72294	3035.97	0	0	2.03627	1.85013	1.84234	5.60033	5.56671	5.53536	108	71	70	1032	1364	1042	Bra033809	1	GARP-G2-like	-	-	-	-	-
Bra038360	Bra038360.1	AT1G68670	-	myb family transcription factor	-2.79255	6.58349	6599.16	0	0	7.38827	7.45094	7.43035	4.64948	4.62514	4.62632	4503	3528	3448	533	709	554	Bra038360	1	GARP-G2-like	-	-	-	-	-
Bra018204	Bra018204.1	AT3G46640	PCL1,LUX	PCL1 (PHYTOCLOCK 1);DNA binding / transcription factor	4.96642	3.19304	1335.13	2.62595e-292	8.87568e-291	-0.635628	-0.66394	-0.771293	4.0897	4.06478	4.12201	15	11	10	361	480	390	Bra018204	1	GARP-G2-like	-	-	-	-	-
Bra021038	Bra021038.1	AT4G17695	KAN3	KAN3 (KANADI 3);DNA binding / transcription factor	2.1559	0.471946	76.8356	1.85798e-18	9.17824e-18	-0.635628	-0.781944	-1.37374	1.19625	1.18337	0.931574	15	10	6	47	63	41	Bra021038	1	GARP-G2-like	-	-	-	-	-
Bra025161	Bra025161.1	AT3G25790	-	myb family transcription factor	-2.18483	0.232103	70.2799	5.14604e-17	2.43255e-16	1.11652	0.74167	0.876488	-0.731975	-1.09719	-1.33326	56	32	35	11	11	7	Bra025161	1	GARP-G2-like	-	-	-	-	-
Bra036412	Bra036412.1	AT3G04030	-	myb family transcription factor	2.17642	-0.362648	26.8734	2.17227e-07	6.80736e-07	-0.812762	-1.81519	-2.8795	0.161269	-0.178453	0.458637	13	4	1	22	23	29	Bra036412	1	GARP-G2-like	-	-	-	-	-
Bra016734	Bra016734.1	AT1G13300	-	myb family transcription factor	-2.62316	-1.36843	25.9645	3.47759e-07	1.07522e-06	-0.5546	-0.453457	-1.19796	-2.14135	-3.05201	-2.51671	16	13	7	3	1	2	Bra016734	1	GARP-G2-like	-	-	-	-	-
Bra012964	Bra012964.1	AT5G61380	TOC1,APRR1,PRR1	TOC1 (TIMING OF CAB EXPRESSION 1);transcription regulator/ two-component response regulator	2.67773	6.64093	6458.44	0	0	4.65666	4.80446	4.69967	7.38738	7.37672	7.40007	676	562	518	3566	4789	3800	Bra012964	1	GARP-ARR-B, C2C2-CO-like	-	-	-	-	-
Bra035933	Bra035933.1	AT5G61380	TOC1,APRR1,PRR1	TOC1 (TIMING OF CAB EXPRESSION 1);transcription regulator/ two-component response regulator	2.34398	6.73283	5380.94	0	0	5.16571	5.07654	5.04815	7.43275	7.47027	7.42788	963	679	660	3680	5110	3874	Bra035933	1	GARP-ARR-B, C2C2-CO-like	-	-	-	-	-
Bra004507	Bra004507.1	AT2G46790	APRR9,PRR9,TL1	APRR9 (ARABIDOPSIS PSEUDO-RESPONSE REGULATOR 9);protein binding / transcription regulator/ two-component response regulator	-3.88147	2.09238	392.686	2.15318e-87	2.76329e-86	2.91128	2.85278	2.7303	-2.14135	-0.236224	-0.915531	200	144	131	3	22	10	Bra004507	1	GARP-ARR-B, C2C2-CO-like	-	-	-	-	-
Bra003782	Bra003782.1	AT1G74890	ARR15	ARR15 (RESPONSE REGULATOR 15);transcription regulator/ two-component response regulator	-2.48871	3.48136	861.889	1.89195e-189	4.35726e-188	4.27408	4.21916	4.34597	1.75306	1.93806	1.7157	518	374	405	70	108	72	Bra003782	1	GARP-ARR-B	-	-	-	-	-
Bra023756	Bra023756.1	AT3G23150	ETR2	ETR2 (ethylene response 2);ethylene binding / glycogen synthase kinase 3/ protein histidine kinase/ receptor	2.39781	1.61709	180.357	4.05025e-41	3.17154e-40	0.022203	0.351125	-0.543945	2.31215	2.14455	2.47256	25	24	12	104	125	123	Bra023756	1	GARP-ARR-B	-	-	-	-	-
Bra006050	Bra006050.1	AT5G10120	-	ethylene insensitive 3 family protein	2.44048	-1.34686	22.3222	2.30529e-06	6.76428e-06	-2.34049	-3.54139	-2.08382	-0.522982	-0.897551	-0.799434	3	0	3	13	13	11	Bra006050	1	EIL	-	-	-	-	-
Bra018589	Bra018589.1	AT1G08970	HAP5C,NF-YC9	NF-YC9 (NUCLEAR FACTOR Y,SUBUNIT C9);DNA binding / transcription factor	2.75049	-1.57845	21.3167	3.89325e-06	1.12294e-05	-2.64153	-2.88408	-2.8795	-0.428841	-1.09719	-1.33326	2	1	1	14	11	7	Bra018589	1	CCAAT-HAP5	-	-	-	-	-
Bra032395	Bra032395.1	AT1G30500	NF-YA7	NF-YA7 (NUCLEAR FACTOR Y,SUBUNIT A7);specific transcriptional repressor/ transcription factor	-2.4953	2.2385	362.458	8.20968e-81	9.98485e-80	3.04729	3.03831	3.00647	0.48525	0.749673	0.504538	220	164	159	28	46	30	Bra032395	1	CCAAT-HAP2	-	-	-	-	-
Bra007205	Bra007205.1	AT3G55980	SZF1,ATSZF1	SZF1 (SALT-INDUCIBLE ZINC FINGER 1);transcription factor	-3.40209	9.2518	25321.5	0	0	10.1556	10.1371	10.1124	6.74568	6.74641	6.70902	30671	22715	22138	2285	3093	2353	Bra007205	1	C3H	-	-	-	-	-
Bra001066	Bra001066.1	AT3G02830	ZFN1	ZFN1 (ZINC FINGER PROTEIN 1);DNA binding / nuclease/ nucleic acid binding	-2.0849	3.36077	605.026	1.35056e-133	2.37208e-132	4.02995	4.09493	4.14861	2.02667	1.98937	2.06111	437	343	353	85	112	92	Bra001066	1	C3H	-	-	-	-	-
Bra027537	Bra027537.1	AT5G44260	-	zinc finger (CCCH-type) family protein	-3.01739	2.42914	500.883	6.10676e-111	9.31116e-110	3.33996	3.378	3.14339	0.277536	0.52468	0.204282	270	208	175	24	39	24	Bra027537	1	C3H	-	-	-	-	-
Bra015376	Bra015376.1	AT1G04990	-	zinc finger (CCCH-type) family protein	2.07338	2.58022	325.402	9.64294e-73	1.09187e-71	1.04032	1.14885	1.42541	3.19262	3.21373	3.28847	53	43	52	193	265	218	Bra015376	1	C3H	-	-	-	-	-
Bra039988	Bra039988.1	AT2G29580	-	zinc finger (CCCH-type) family protein / RNA recognition motif (RRM)-containing protein	2.02242	2.66038	299.563	4.10165e-67	4.40298e-66	1.21224	1.30172	1.45202	3.18519	3.4101	3.26866	60	48	53	192	304	215	Bra039988	1	C3H	-	-	-	-	-
Bra010334	Bra010334.1	AT4G29190	-	zinc finger (CCCH-type) family protein	4.31659	-1.74431	29.9849	4.35423e-08	1.41961e-07	-3.54139	-3.54139	-2.8795	-0.849043	-0.807219	-1.69891	0	0	1	10	14	5	Bra010334	1	C3H	-	-	-	-	-
Bra006691	Bra006691.1	AT5G59820	RHL41,ZAT12	RHL41 (RESPONSIVE TO HIGH LIGHT 41);nucleic acid binding / transcription factor/ zinc ion binding	-2.56802	4.95706	1759.46	0	0	5.754	5.92855	5.8262	3.30648	3.23515	3.26199	1449	1227	1133	209	269	214	Bra006691	1	C2H2	-	-	-	-	-
Bra010922	Bra010922.1	AT1G27730	STZ,ZAT10	STZ (salt tolerance zinc finger);nucleic acid binding / transcription factor/ transcription repressor/ zinc ion binding	-2.68262	7.25873	9685.57	0	0	8.0685	8.09989	8.06387	5.36927	5.42015	5.39314	7217	5533	5350	879	1232	944	Bra010922	1	C2H2	-	-	-	-	-
Bra022436	Bra022436.1	AT3G19580	AZF2	AZF2 (ARABIDOPSIS ZINC-FINGER PROTEIN 2);DNA binding / nucleic acid binding / transcription factor/ transcription repressor/ zinc ion binding	-3.5699	5.05782	2796.13	0	0	5.97222	6.05332	6.1403	2.46711	2.5034	2.51803	1686	1338	1409	116	161	127	Bra022436	1	C2H2	-	-	-	-	-
Bra032845	Bra032845.1	AT1G27730	STZ,ZAT10	STZ (salt tolerance zinc finger);nucleic acid binding / transcription factor/ transcription repressor/ zinc ion binding	-2.21376	6.16568	3929.63	0	0	6.89935	6.92929	6.88492	4.64948	4.76973	4.6418	3208	2457	2362	533	784	560	Bra032845	1	C2H2	-	-	-	-	-
Bra038219	Bra038219.1	AT3G19580	AZF2	AZF2 (ARABIDOPSIS ZINC-FINGER PROTEIN 2);DNA binding / nucleic acid binding / transcription factor/ transcription repressor/ zinc ion binding	-3.08504	4.71173	2455.99	0	0	5.56069	5.65248	5.56944	2.44241	2.63812	2.44928	1267	1013	948	114	177	121	Bra038219	1	C2H2	-	-	-	-	-
Bra006692	Bra006692.1	AT5G59820	RHL41,ZAT12	RHL41 (RESPONSIVE TO HIGH LIGHT 41);nucleic acid binding / transcription factor/ zinc ion binding	-2.46053	4.29526	745.304	4.21194e-164	8.60898e-163	4.92206	5.13266	5.17337	2.62908	2.86798	2.4375	813	706	720	130	208	120	Bra006692	1	C2H2	-	-	-	-	-
Bra016900	Bra016900.1	AT2G41940	ZFP8	ZFP8 (ZINC FINGER PROTEIN 8);nucleic acid binding / transcription factor/ zinc ion binding	2.85219	3.10994	732.953	2.04214e-161	4.11817e-160	1.014	0.824767	1.3425	3.80004	3.8969	3.89958	52	34	49	295	427	334	Bra016900	1	C2H2	-	-	-	-	-
Bra029985	Bra029985.1	AT3G49930	-	zinc finger (C2H2 type) family protein	5.15229	1.7186	474.196	3.91382e-105	5.73544e-104	-1.69433	-2.09175	-2.42749	2.66155	2.48565	2.70657	6	3	2	133	159	145	Bra029985	1	C2H2	-	-	-	-	-
Bra037845	Bra037845.1	AT5G67450	AZF1	AZF1 (ARABIDOPSIS ZINC-FINGER PROTEIN 1);DNA binding / nucleic acid binding / transcription factor/ transcription repressor/ zinc ion binding	-2.45345	1.79899	259.346	2.38244e-58	2.3413e-57	2.55746	2.55717	2.64061	-0.0328451	0.416362	0.14755	156	117	123	19	36	23	Bra037845	1	C2H2	-	-	-	-	-
Bra007378	Bra007378.1	AT3G58070	GIS	GIS (GLABROUS INFLORESCENCE STEMS);nucleic acid binding / transcription factor/ zinc ion binding	2.58764	1.36763	180.668	3.46369e-41	2.71956e-40	-0.0875197	-0.358712	-1.04129	2.21343	2.08683	1.89872	23	14	8	97	120	82	Bra007378	1	C2H2	-	-	-	-	-
Bra000245	Bra000245.1	AT2G41940	ZFP8	ZFP8 (ZINC FINGER PROTEIN 8);nucleic acid binding / transcription factor/ zinc ion binding	2.41426	1.63108	169.547	9.29139e-39	7.01508e-38	0.264756	-0.453457	0.183831	2.50338	2.44946	2.01429	30	13	21	119	155	89	Bra000245	1	C2H2	-	-	-	-	-
Bra035609	Bra035609.1	AT5G56200	-	zinc finger (C2H2 type) family protein	3.62841	0.0618086	110.651	7.05454e-26	4.20821e-25	-2.09155	-2.09175	-2.42749	0.828014	0.7196	1.02902	4	3	2	36	45	44	Bra035609	1	C2H2	-	-	-	-	-
Bra008445	Bra008445.1	AT1G80730	ZFP1,ATZFP1	ZFP1 (ZINC-FINGER PROTEIN 1);nucleic acid binding / transcription factor/ zinc ion binding	4.16721	-1.66133	26.0224	3.37477e-07	1.0443e-06	-3.54139	-2.43419	-3.54139	-0.849043	-0.807219	-1.69891	0	2	0	10	14	5	Bra008445	1	C2H2	-	-	-	-	-
Bra005197	Bra005197.1	AT2G37430	-	zinc finger (C2H2 type) family protein (ZAT11)	2.00636	-0.55679	24.9606	5.85142e-07	1.78664e-06	-1.5304	-1.20798	-2.42749	0.708815	-0.178453	-0.104724	7	7	2	33	23	19	Bra005197	1	C2H2	-	-	-	-	-
Bra028724	Bra028724.1	AT5G06650	GIS2	GIS2 (GLABROUS INFLORESCENCE STEMS 2);nucleic acid binding / transcription factor/ zinc ion binding	2.61838	-1.33099	22.6467	1.94697e-06	5.74227e-06	-3.02241	-2.88408	-1.80647	-0.849043	-0.493655	-1.0418	1	1	4	10	18	9	Bra028724	1	C2H2	-	-	-	-	-
Bra016280	Bra016280.1	AT1G26610	-	zinc finger (C2H2 type) family protein	3.07366	-1.99614	15.7181	7.35186e-05	0.000191404	-3.02241	-2.88408	-3.54139	-1.44439	-1.94722	-0.915531	1	1	0	6	5	10	Bra016280	1	C2H2	-	-	-	-	-
Bra001026	Bra001026.1	AT3G01030	-	nucleic acid binding / transcription factor/ zinc ion binding	4.99052	-2.54882	15.5433	8.06363e-05	0.000209319	-3.54139	-3.54139	-3.54139	-1.64151	-2.15438	-2.1899	0	0	0	5	4	3	Bra001026	1	C2H2	-	-	-	-	-
Bra031715	Bra031715.1	AT1G10480	ZFP5	ZFP5 (ZINC FINGER PROTEIN 5);nucleic acid binding / transcription factor/ zinc ion binding	3.47842	-2.08756	12.7284	0.000360143	0.000881353	-3.54139	-2.43419	-3.54139	-1.271	-2.39635	-1.18018	0	2	0	7	3	8	Bra031715	1	C2H2	-	-	-	-	-
Bra002836	Bra002836.1	AT5G56200	-	zinc finger (C2H2 type) family protein	2.11469	-1.9649	10.0012	0.0015644	0.00358304	-2.34049	-3.54139	-2.8795	-0.976457	-1.60522	-1.92362	3	0	1	9	7	4	Bra002836	1	C2H2	-	-	-	-	-
Bra003194	Bra003194.1	AT3G54810	BME3-ZF,BME3	zinc finger (GATA type) family protein	-3.01906	6.53153	7872.21	0	0	7.40862	7.3793	7.40162	4.40299	4.41603	4.32112	4567	3357	3380	449	613	448	Bra003194	1	C2C2-GATA	-	-	-	-	-
Bra006851	Bra006851.1	AT5G56860	GNC	GNC (GATA,nitrate-inducible,carbon metabolism-involved);transcription factor	3.16625	4.18508	1670.94	0	0	1.81019	1.78936	1.95825	5.04563	4.93425	4.99526	92	68	76	702	879	716	Bra006851	1	C2C2-GATA	-	-	-	Flower genes	-
Bra007099	Bra007099.1	AT3G54810	BME3-ZF,BME3	zinc finger (GATA type) family protein	-3.13731	6.56842	6935.91	0	0	7.52329	7.43821	7.51639	4.39978	4.32409	4.38999	4945	3497	3660	448	575	470	Bra007099	1	C2C2-GATA	-	-	-	-	-
Bra026461	Bra026461.1	AT4G26150	CGA1	CGA1 (CYTOKININ-RESPONSIVE GATA FACTOR 1);transcription factor	2.5276	3.82459	816.894	1.14581e-179	2.51504e-178	1.79481	2.21607	2.08267	4.47781	4.49582	4.63666	91	92	83	473	648	558	Bra026461	1	C2C2-GATA	-	-	-	Flower genes	-
Bra019118	Bra019118.1	AT5G56860	GNC	GNC (GATA,nitrate-inducible,carbon metabolism-involved);transcription factor	3.32227	2.91834	776.724	6.20568e-171	1.30175e-169	0.264756	0.406128	0.795684	3.74556	3.67981	3.77402	30	25	33	284	367	306	Bra019118	1	C2C2-GATA	-	-	-	Flower genes	-
Bra014297	Bra014297.1	AT1G51700	ADOF1	ADOF1;DNA binding / transcription factor	-2.76765	5.84473	4132.9	0	0	6.6694	6.68082	6.7527	3.96085	3.9136	3.9419	2735	2068	2155	330	432	344	Bra014297	1	C2C2-Dof	-	-	-	-	-
Bra010848	Bra010848.1	AT1G29160	-	Dof-type zinc finger domain-containing protein	2.94629	0.773377	147.469	6.19619e-34	4.33627e-33	-1.12741	-1.58322	-0.899987	1.48935	1.46292	1.63546	10	5	9	58	77	68	Bra010848	1	C2C2-Dof	-	-	-	-	-
Bra032292	Bra032292.1	AT1G29160	-	Dof-type zinc finger domain-containing protein	2.67127	0.889481	141.361	1.34126e-32	9.15201e-32	-0.721478	-1.05157	-0.899987	1.58271	1.51637	1.75421	14	8	9	62	80	74	Bra032292	1	C2C2-Dof	-	-	-	-	-
Bra030124	Bra030124.1	AT1G29160	-	Dof-type zinc finger domain-containing protein	3.12045	0.60728	135.91	2.08735e-31	1.39368e-30	-1.87932	-1.20798	-1.19796	1.58271	1.34967	1.17809	5	7	7	62	71	49	Bra030124	1	C2C2-Dof	-	-	-	-	-
Bra012119	Bra012119.1	AT5G66940	-	Dof-type zinc finger domain-containing protein	-2.31503	1.12293	135.415	2.67945e-31	1.78374e-30	1.68231	2.05331	1.92064	0.0348034	-0.565891	-0.410661	84	82	74	20	17	15	Bra012119	1	C2C2-Dof	-	-	-	-	-
Bra037822	Bra037822.1	AT5G65590	-	Dof-type zinc finger domain-containing protein	2.8581	-1.7781	19.0725	1.25847e-05	3.48842e-05	-2.64153	-3.54139	-2.8795	-1.11622	-1.09719	-1.33326	2	0	1	8	11	7	Bra037822	1	C2C2-Dof	-	-	-	-	-
Bra001264	Bra001264.1	AT3G07650	COL9	COL9 (CONSTANS-LIKE 9);transcription factor/ zinc ion binding	5.74276	4.26204	2849.02	0	0	-0.206279	-1.05157	-0.258608	5.15798	5.12413	5.21824	21	8	15	759	1003	836	Bra001264	1	C2C2-CO-like	-	-	-	-	-
Bra008668	Bra008668.1	AT5G15850	COL1,ATCOL1	COL1 (constans-like 1);transcription factor/ zinc ion binding	-3.64613	4.52893	2763.49	0	0	5.50507	5.42004	5.44745	1.64897	1.93806	1.89872	1219	862	871	65	108	82	Bra008668	1	C2C2-CO-like	-	-	-	-	-
Bra015548	Bra015548.1	AT1G07050	-	CONSTANS-like protein-related	6.45874	5.55271	7845.86	0	0	-0.0875197	0.172291	0.362775	6.48199	6.48277	6.49902	23	21	24	1903	2576	2034	Bra015548	1	C2C2-CO-like	-	-	-	-	-
Bra020709	Bra020709.1	AT5G48250	-	zinc finger (B-box type) family protein	5.12984	4.53928	3212.28	0	0	0.219399	0.45911	0.571336	5.50664	5.43988	5.39467	29	26	28	967	1249	945	Bra020709	1	C2C2-CO-like	-	-	-	-	-
Bra024750	Bra024750.1	AT1G25440	-	zinc finger (B-box type) family protein	2.07263	6.03275	2910.43	0	0	4.68196	4.49764	4.53829	6.63764	6.63301	6.65025	688	454	463	2120	2859	2259	Bra024750	1	C2C2-CO-like	-	-	-	-	-
Bra029666	Bra029666.1	AT3G07650	COL9	COL9 (CONSTANS-LIKE 9);transcription factor/ zinc ion binding	2.76791	5.02486	2090.74	0	0	2.97407	2.68499	3.11036	5.68961	5.70551	5.77543	209	128	171	1098	1502	1231	Bra029666	1	C2C2-CO-like	-	-	-	-	-
Bra037499	Bra037499.1	AT5G48250	-	zinc finger (B-box type) family protein	3.67504	4.86076	2825.95	0	0	1.98299	2.15316	1.47815	5.60172	5.63678	5.60418	104	88	54	1033	1432	1093	Bra037499	1	C2C2-CO-like	-	-	-	-	-
Bra040020	Bra040020.1	AT3G07650	COL9	COL9 (CONSTANS-LIKE 9);transcription factor/ zinc ion binding	3.66566	4.22223	2139.54	0	0	1.52344	1.41332	1.3425	5.09796	5.02464	5.08107	75	52	49	728	936	760	Bra040020	1	C2C2-CO-like	-	-	-	-	-
Bra030669	Bra030669.1	AT1G07050	-	CONSTANS-like protein-related	2.13152	4.92594	1395.72	1.79253e-305	6.34875e-304	3.42733	3.55879	3.48362	5.56787	5.67743	5.57085	287	236	222	1009	1473	1068	Bra030669	1	C2C2-CO-like	-	-	-	-	-
Bra029069	Bra029069.1	AT5G53420	-	FUNCTIONS IN: molecular_function unknown;INVOLVED IN: biological_process unknown;LOCATED IN: cellular_component unknown;EXPRESSED IN: 23 plant structures;EXPRESSED DURING: 13 growth stages;CONTAINS InterPro DOMAIN/s: CCT domain (InterPro:IPR010402);BEST Arabidopsis thaliana protein match is: unknown protein (TAIR:AT4G27900.2);Has 863 Blast hits to 863 proteins in 62 species: Archae - 0;Bacteria -…	2.56091	3.91721	1082.84	1.774e-237	4.95829e-236	1.9965	2.12064	2.24365	4.72566	4.61087	4.62372	105	86	93	562	702	553	Bra029069	1	C2C2-CO-like	-	-	-	-	-
Bra021464	Bra021464.1	AT3G02380	COL2	COL2 (constans-like 2);transcription factor/ zinc ion binding	-5.05118	1.21464	332.382	2.91136e-74	3.34778e-73	2.11269	2.16914	2.13288	-2.47601	-2.68725	-1.50453	114	89	86	2	2	6	Bra021464	1	C2C2-CO-like	-	-	-	-	-
Bra002516	Bra002516.1	AT5G59990	-	FUNCTIONS IN: molecular_function unknown;INVOLVED IN: biological_process unknown;LOCATED IN: cellular_component unknown;EXPRESSED IN: shoot apex,stem,leaf whorl,flower;EXPRESSED DURING: petal differentiation and expansion stage;CONTAINS InterPro DOMAIN/s: CCT domain (InterPro:IPR010402);BEST Arabidopsis thaliana protein match is: unknown protein (TAIR:AT5G41380.1);Has 918 Blast hits to 918 protei…	-2.00437	0.718275	73.8969	8.23075e-18	3.98608e-17	1.23521	1.30172	1.47815	-0.340468	-1.46049	-0.249598	61	48	54	15	8	17	Bra002516	1	C2C2-CO-like	-	-	-	-	-
Bra023541	Bra023541.1	AT5G15850	COL1,ATCOL1	COL1 (constans-like 1);transcription factor/ zinc ion binding	-4.00175	-1.51031	38.0933	6.74411e-10	2.41064e-09	-0.477883	-0.66394	-1.19796	-2.91251	-3.05201	-3.54139	17	11	7	1	1	0	Bra023541	1	C2C2-CO-like	-	-	-	Flower genes	-
Bra030574	Bra030574.1	AT1G04500	-	zinc finger CONSTANS-related	5.89208	-2.0904	23.7138	1.11777e-06	3.34912e-06	-3.54139	-3.54139	-3.54139	-1.86989	-1.60522	-0.410661	0	0	0	4	7	15	Bra030574	1	C2C2-CO-like	-	-	-	-	-
Bra004689	Bra004689.1	AT2G42380	ATBZIP34,BZIP34	bZIP transcription factor family protein	-2.09231	5.98271	3444.66	0	0	6.73231	6.68639	6.69678	4.60844	4.62919	4.6159	2857	2076	2073	518	711	550	Bra004689	1	bZIP	-	-	-	-	-
Bra010035	Bra010035.1	AT5G49450	AtbZIP1	AtbZIP1 (Arabidopsis thaliana basic leucine-zipper 1);DNA binding / protein heterodimerization/ transcription factor	-3.87597	4.94219	3871.24	0	0	5.85477	5.92738	5.90295	1.94111	1.96394	2.22088	1554	1226	1195	80	110	103	Bra010035	1	bZIP	-	-	-	-	-
Bra000256	Bra000256.1	AT2G42380	ATBZIP34,BZIP34	bZIP transcription factor family protein	-2.58707	3.55792	961.072	5.20015e-211	1.32263e-209	4.40393	4.31569	4.38447	1.71233	1.93806	1.73508	567	400	416	68	108	73	Bra000256	1	bZIP	-	-	-	-	-
Bra021258	Bra021258.1	AT3G17609	HYH	HYH (HY5-HOMOLOG);DNA binding / transcription factor	-3.60874	2.45237	670.522	7.69166e-148	1.45994e-146	3.32933	3.41199	3.40408	-0.178473	-0.0178469	-0.175343	268	213	210	17	26	18	Bra021258	1	bZIP	-	-	-	-	-
Bra023317	Bra023317.1	AT5G11260	HY5,TED 5	HY5 (ELONGATED HYPOCOTYL 5);DNA binding / double-stranded DNA binding / transcription factor	-2.02839	3.07431	474.068	4.17427e-105	6.11043e-104	3.79895	3.82916	3.72639	1.77301	1.72754	1.86393	372	285	263	71	93	80	Bra023317	1	bZIP	-	-	-	-	-
Bra022225	Bra022225.1	AT3G17609	HYH	HYH (HY5-HOMOLOG);DNA binding / transcription factor	-3.66639	1.6589	349.65	5.05195e-78	6.00436e-77	2.44374	2.4951	2.68615	-1.86989	-0.897551	-0.498479	144	112	127	4	13	14	Bra022225	1	bZIP	-	-	-	-	-
Bra023540	Bra023540.1	AT5G15830	AtbZIP3	AtbZIP3 (Arabidopsis thaliana basic leucine-zipper 3);DNA binding / transcription factor	3.01678	1.60432	275.262	8.09308e-62	8.26676e-61	-0.812762	-0.453457	-0.174794	2.36568	2.47668	2.24812	13	13	16	108	158	105	Bra023540	1	bZIP	-	-	-	-	-
Bra019715	Bra019715.1	AT1G13600	AtbZIP58	AtbZIP58 (Arabidopsis thaliana basic leucine-zipper 58);DNA binding / protein heterodimerization/ protein homodimerization/ transcription factor	2.35153	-0.414319	45.0441	1.92651e-11	7.40105e-11	-1.69433	-1.81519	-1.80647	0.220573	0.215532	0.258868	6	4	4	23	31	25	Bra019715	1	bZIP	-	-	-	-	-
Bra012972	Bra012972.1	AT5G61270	PIF7	PIF7 (PHYTOCHROME-INTERACTING FACTOR7);DNA binding / double-stranded DNA binding / transcription factor	-2.70884	4.59511	2015.7	0	0	5.42991	5.48055	5.36933	2.7447	2.72393	2.73573	1157	899	825	141	188	148	Bra012972	1	bHLH	-	-	-	-	-
Bra039927	Bra039927.1	AT2G22770	NAI1	NAI1;DNA binding / transcription factor	-2.3537	3.59697	860.458	3.87268e-189	8.90388e-188	4.40393	4.34765	4.35657	2.09165	1.97671	2.07639	567	409	408	89	111	93	Bra039927	1	bHLH	-	-	-	-	-
Bra016886	Bra016886.1	AT2G42280	-	basic helix-loop-helix (bHLH) family protein	2.68306	3.43266	857.272	1.90814e-188	4.37475e-187	1.6655	1.46605	1.3983	4.14814	4.15743	4.23524	83	54	51	376	512	422	Bra016886	1	bHLH	-	-	-	-	-
Bra004748	Bra004748.1	AT2G43140	-	DNA binding / transcription factor	2.3761	2.15592	296.021	2.42481e-66	2.58657e-65	0.583915	0.607297	0.417809	2.80407	2.90853	2.82888	38	29	25	147	214	158	Bra004748	1	bHLH	-	-	-	-	-
Bra004015	Bra004015.1	AT1G68810	-	basic helix-loop-helix (bHLH) family protein	-3.60213	1.20259	261.1	9.88191e-59	9.73715e-58	2.14943	2.1041	1.95825	-2.14135	-0.807219	-1.33326	117	85	76	3	14	7	Bra004015	1	bHLH	-	-	-	-	-
Bra024992	Bra024992.1	AT5G46830	-	basic helix-loop-helix (bHLH) family protein	-2.02486	1.49651	144.73	2.46034e-33	1.69873e-32	2.32028	1.92736	2.31786	0.161269	0.215532	0.458637	132	75	98	22	31	29	Bra024992	1	bHLH	-	-	-	-	-
Bra030208	Bra030208.1	AT2G22760	-	basic helix-loop-helix (bHLH) family protein	-7.7474	-0.646546	112.944	2.21981e-26	1.34028e-25	0.264756	0.293942	0.362775	-3.54139	-3.54139	-3.54139	30	23	24	0	0	0	Bra030208	1	bHLH	-	-	-	-	-
Bra027501	Bra027501.1	AT5G43650	-	basic helix-loop-helix (bHLH) family protein	-2.52978	0.133051	81.2928	1.94632e-19	9.88216e-19	0.845101	0.864587	0.989795	-1.64151	-1.32896	-1.18018	46	35	38	5	9	8	Bra027501	1	bHLH	-	-	-	-	-
Bra033690	Bra033690.1	AT5G43650	-	basic helix-loop-helix (bHLH) family protein	-2.82448	-0.0800164	59.5997	1.16252e-14	5.08479e-14	1.16518	0.698255	0.245978	-1.86989	-1.60522	-1.69891	58	31	22	4	7	5	Bra033690	1	bHLH	-	-	-	-	-
Bra039926	Bra039926.1	AT2G22760	-	basic helix-loop-helix (bHLH) family protein	-3.57717	-1.42313	36.5098	1.519e-09	5.3423e-09	-0.5546	-0.358712	-1.19796	-3.54139	-3.05201	-2.51671	16	14	7	0	1	2	Bra039926	1	bHLH	-	-	-	-	-
Bra015480	Bra015480.1	AT1G06170	-	basic helix-loop-helix (bHLH) family protein	-5.60402	-2.22948	23.2861	1.39602e-06	4.15712e-06	-2.09155	-1.05157	-1.57394	-3.54139	-3.54139	-3.54139	4	8	5	0	0	0	Bra015480	1	bHLH	-	-	-	-	-
Bra011972	Bra011972.1	AT2G28160	FIT1,ATBHLH029,FRU,BHLH029,ATBHLH29	FRU (FER-LIKE REGULATOR OF IRON UPTAKE);DNA binding / transcription factor	-2.25619	-1.98276	11.8034	0.000591214	0.00141801	-1.5304	-1.20798	-1.57394	-2.91251	-3.05201	-2.51671	7	7	5	1	1	2	Bra011972	1	bHLH	-	-	-	-	-
Bra039855	Bra039855.1	AT4G14550	IAA14,SLR	IAA14 (INDOLE-3-ACETIC ACID INDUCIBLE 14);protein binding / transcription factor/ transcription repressor	-2.44404	3.34963	699.373	4.09358e-154	8.0052e-153	4.09104	4.12803	4.06057	1.6704	1.49877	1.96589	456	351	332	66	79	86	Bra039855	1	AUX/IAA	Auxin genes	-	-	-	-
Bra001598	Bra001598.1	AT3G15540	IAA19,MSG2	IAA19 (INDOLE-3-ACETIC ACID INDUCIBLE 19);transcription factor	-2.41881	1.30904	179.228	7.14507e-41	5.56389e-40	2.0622	1.98269	2.19721	-0.178473	-0.424865	-0.0374006	110	78	90	17	19	20	Bra001598	1	AUX/IAA	Auxin genes	-	-	-	-
Bra011332	Bra011332.1	AT4G32280	IAA29	IAA29 (INDOLE-3-ACETIC ACID INDUCIBLE 29);transcription factor	2.04377	-0.239398	30.08	4.1459e-08	1.35298e-07	-2.64153	-1.20798	-1.04129	0.666788	-0.0178469	0.311463	2	7	8	32	26	26	Bra011332	1	AUX/IAA	Auxin genes	-	-	-	-
Bra026755	Bra026755.1	AT1G15580	IAA5,ATAUX2-27,AUX2-27	IAA5 (INDOLE-3-ACETIC ACID INDUCIBLE 5);transcription factor	-3.2375	-2.50587	9.07875	0.00258597	0.00577838	-1.3832	-2.88408	-2.08382	-3.54139	-3.05201	-3.54139	8	1	3	0	1	0	Bra026755	1	AUX/IAA	Auxin genes	-	-	-	-
Bra031599	Bra031599.1	AT2G28500	LBD11	LBD11 (LOB DOMAIN-CONTAINING PROTEIN 11)	2.73729	2.02017	288.69	9.59327e-65	1.00956e-63	0.172569	0.293942	-0.0204941	2.7447	2.70103	3.00686	28	23	18	141	185	179	Bra031599	1	AS2	-	-	-	-	-
Bra032938	Bra032938.1	AT3G26660	LBD24	LBD24 (LOB DOMAIN-CONTAINING PROTEIN 24)	-2.17228	1.47922	162.345	3.47836e-37	2.569e-36	2.33098	1.98269	2.2588	0.385128	0.0800794	-0.104724	133	78	94	26	28	19	Bra032938	1	AS2	-	-	-	-	-
Bra018320	Bra018320.1	AT2G30340	LBD13	LBD13 (LOB DOMAIN-CONTAINING PROTEIN 13)	-3.88533	-1.99141	19.127	1.22302e-05	3.39386e-05	-1.24964	-2.09175	-1.04129	-2.47601	-3.54139	-3.54139	9	3	8	2	0	0	Bra018320	1	AS2	-	-	-	-	-
Bra001087	Bra001087.1	AT3G03760	LBD20	LBD20 (LOB DOMAIN-CONTAINING PROTEIN 20)	2.29938	-2.47734	4.98559	0.0255592	0.0498506	-3.02241	-3.54139	-2.8795	-0.731975	-2.39635	-2.51671	1	0	1	11	3	2	Bra001087	1	AS2	-	-	-	-	-
Bra003780	Bra003780.1	AT1G74930	ORA47	ORA47;DNA binding / transcription factor	-2.8338	4.85771	2683.51	0	0	5.69309	5.73267	5.69867	2.86109	2.88162	2.91637	1389	1071	1037	153	210	168	Bra003780	1	AP2-EREBP	-	-	-	-	-
Bra009250	Bra009250.1	AT5G07580	-	DNA binding / transcription factor	4.27494	5.3299	4934.96	0	0	2.00988	2.03598	1.82208	6.21939	6.23692	6.17016	106	81	69	1586	2172	1619	Bra009250	1	AP2-EREBP	-	-	-	-	-
Bra010880	Bra010880.1	AT1G28370	ERF11,ATERF11	ERF11 (ERF DOMAIN PROTEIN 11);DNA binding / transcription factor/ transcription repressor	-2.48697	6.15916	4316.3	0	0	6.9738	6.99804	6.91273	4.49593	4.45761	4.49604	3378	2577	2408	479	631	506	Bra010880	1	AP2-EREBP	-	-	-	-	-
Bra011529	Bra011529.1	AT4G34410	RRTF1	RRTF1 ({REDOX RESPONSIVE TRANSCRIPTION FACTOR 1);DNA binding / transcription factor	-5.98847	5.26043	5266.71	0	0	6.23122	6.35011	6.29161	0.0994213	0.62543	0.311463	2018	1644	1565	21	42	26	Bra011529	1	AP2-EREBP	-	-	-	-	-
Bra017656	Bra017656.1	AT4G34410	RRTF1	RRTF1 ({REDOX RESPONSIVE TRANSCRIPTION FACTOR 1);DNA binding / transcription factor	-6.20964	3.60864	2224.06	0	0	4.67357	4.63637	4.5961	-0.976457	-1.32896	-1.50453	684	500	482	9	9	6	Bra017656	1	AP2-EREBP	-	-	-	-	-
Bra024539	Bra024539.1	AT1G22810	-	AP2 domain-containing transcription factor,putative	-4.34445	3.78091	1684.53	0	0	4.77307	4.62772	4.72171	0.48525	0.126658	0.827069	733	497	526	28	29	38	Bra024539	1	AP2-EREBP	-	-	-	-	-
Bra024953	Bra024953.1	AT5G47230	ERF5,ATERF-5,ATERF5	ERF5 (ETHYLENE RESPONSIVE ELEMENT BINDING FACTOR 5);DNA binding / transcription activator/ transcription factor	-2.90961	4.81988	2697.87	0	0	5.64993	5.70962	5.68471	2.76476	2.67776	2.92484	1348	1054	1027	143	182	169	Bra024953	1	AP2-EREBP	-	-	-	-	-
Bra028290	Bra028290.1	AT5G51990	CBF4,DREB1D	CBF4 (C- REPEAT-BINDING FACTOR 4);DNA binding / transcription activator/ transcription factor	-6.13537	5.82596	6711.23	0	0	6.87534	6.77198	6.79749	1.1664	0.657508	0.549024	3155	2203	2223	46	43	31	Bra028290	1	AP2-EREBP	-	-	-	-	-
Bra028291	Bra028291.1	AT5G52020	-	AP2 domain-containing protein	-5.21386	4.13973	2948.96	0	0	5.16571	5.13469	5.14715	0.0348034	0.0319469	0.0884959	963	707	707	20	27	22	Bra028291	1	AP2-EREBP	-	-	-	-	-
Bra030095	Bra030095.1	AT1G28370	ERF11,ATERF11	ERF11 (ERF DOMAIN PROTEIN 11);DNA binding / transcription factor/ transcription repressor	-2.01698	5.89072	2565.5	0	0	6.61461	6.68778	6.58551	4.58607	4.64327	4.59748	2633	2078	1919	510	718	543	Bra030095	1	AP2-EREBP	-	-	-	-	-
Bra032901	Bra032901.1	AT1G28370	ERF11,ATERF11	ERF11 (ERF DOMAIN PROTEIN 11);DNA binding / transcription factor/ transcription repressor	-5.32533	4.09503	2830.19	0	0	5.11861	5.04656	5.15729	-0.257198	-0.296404	0.258868	932	665	712	16	21	25	Bra032901	1	AP2-EREBP	-	-	-	-	-
Bra034624	Bra034624.1	AT4G34410	RRTF1	RRTF1 ({REDOX RESPONSIVE TRANSCRIPTION FACTOR 1);DNA binding / transcription factor	-6.14101	4.49636	4101.35	0	0	5.55841	5.5138	5.49781	-0.428841	-0.493655	-0.410661	1265	920	902	14	18	15	Bra034624	1	AP2-EREBP	-	-	-	-	-
Bra035732	Bra035732.1	AT5G51190	-	AP2 domain-containing transcription factor,putative	-2.19088	6.17925	3620.75	0	0	6.9025	6.91336	6.97713	4.77595	4.75312	4.69226	3215	2430	2518	582	775	580	Bra035732	1	AP2-EREBP	-	-	-	-	-
Bra036022	Bra036022.1	AT1G21910	-	AP2 domain-containing transcription factor family protein	-2.70172	6.03571	4541.19	0	0	6.83409	6.81199	6.79164	4.24057	4.01922	4.13301	3066	2265	2214	401	465	393	Bra036022	1	AP2-EREBP	-	-	-	-	-
Bra037630	Bra037630.1	AT2G44840	ATERF13,EREBP,ERF13	ERF13 (ETHYLENE-RESPONSIVE ELEMENT BINDING FACTOR 13);DNA binding / transcription factor	-4.61055	3.33671	1553.11	0	0	4.33914	4.30487	4.32812	-0.178473	-0.0178469	-0.327883	542	397	400	17	26	16	Bra037630	1	AP2-EREBP	-	-	-	-	-
Bra040158	Bra040158.1	AT4G17490	ATERF6,ERF-6-6	ATERF6 (ETHYLENE RESPONSIVE ELEMENT BINDING FACTOR 6);DNA binding / transcription factor	-3.27001	5.30466	3781.01	0	0	6.17442	6.25687	6.18361	2.93377	3.01141	2.87329	1940	1541	1452	161	230	163	Bra040158	1	AP2-EREBP	-	-	-	-	-
Bra015882	Bra015882.1	AT1G74930	ORA47	ORA47;DNA binding / transcription factor	-3.30023	3.62471	1378.14	1.17977e-301	4.14242e-300	4.47561	4.54129	4.5781	1.4403	1.16116	1.23365	596	468	476	56	62	51	Bra015882	1	AP2-EREBP	-	-	-	-	-
Bra027736	Bra027736.1	AT1G64380	-	AP2 domain-containing transcription factor,putative	-2.44745	4.14983	1338.77	4.24072e-293	1.43933e-291	4.89707	4.9596	4.9835	2.55037	2.45859	2.54024	799	626	631	123	156	129	Bra027736	1	AP2-EREBP	-	-	-	-	-
Bra032665	Bra032665.1	AT2G44840	ATERF13,EREBP,ERF13	ERF13 (ETHYLENE-RESPONSIVE ELEMENT BINDING FACTOR 13);DNA binding / transcription factor	-3.42597	4.00472	1331.22	1.85868e-291	6.2771e-290	4.83076	4.83234	4.98805	1.8688	1.42615	1.31318	763	573	633	76	75	54	Bra032665	1	AP2-EREBP	-	-	-	-	-
Bra031069	Bra031069.1	AT1G19220	ARF19,IAA22,ARF11	ARF19 (AUXIN RESPONSE FACTOR 19);DNA binding / transcription factor	-6.05413	2.88798	1330.99	2.08761e-291	7.04437e-290	3.88134	3.93581	3.93414	-1.86989	-1.76611	-1.50453	394	307	304	4	6	6	Bra031069	1	AP2-EREBP	-	-	-	-	-
Bra016763	Bra016763.1	AT1G12610	DDF1	DDF1 (DWARF AND DELAYED FLOWERING 1);DNA binding / sequence-specific DNA binding / transcription factor	-6.06985	2.81349	1264.76	5.14871e-277	1.66688e-275	3.81046	3.83418	3.88127	-1.44439	-2.15438	-1.69891	375	286	293	6	4	5	Bra016763	1	AP2-EREBP	-	-	-	-	-
Bra011383	Bra011383.1	AT4G32800	-	AP2 domain-containing transcription factor TINY,putative	-2.87256	3.97909	1225.15	2.0864e-268	6.57678e-267	4.89527	4.91051	4.74341	2.16895	2.03892	1.81011	798	605	534	94	116	77	Bra011383	1	AP2-EREBP	-	-	-	-	-
Bra019777	Bra019777.1	AT1G12610	DDF1	DDF1 (DWARF AND DELAYED FLOWERING 1);DNA binding / sequence-specific DNA binding / transcription factor	-6.84223	2.38472	867.591	1.08951e-190	2.52349e-189	3.33996	3.27095	3.42438	-2.47601	-3.54139	-1.92362	270	193	213	2	0	4	Bra019777	1	AP2-EREBP	-	-	-	-	-
Bra016136	Bra016136.1	AT1G71450	-	AP2 domain-containing transcription factor,putative	-5.72598	2.16931	633.618	8.16453e-140	1.4886e-138	3.07301	3.00306	3.10198	-3.54139	-1.46049	-2.1899	224	160	170	0	8	3	Bra016136	1	AP2-EREBP	-	-	-	-	-
Bra008952	Bra008952.1	AT5G11590	TINY2	TINY2 (TINY2);DNA binding / transcription factor	-2.33969	3.16919	617.947	2.09074e-136	3.73497e-135	4.00009	3.83418	3.9668	1.53679	1.66579	1.67614	428	286	311	60	89	70	Bra008952	1	AP2-EREBP	-	-	-	-	-
Bra019087	Bra019087.1	AT2G20350	-	AP2 domain-containing transcription factor,putative	-5.19043	1.76937	560.341	7.08819e-124	1.17353e-122	2.69637	2.77132	2.85518	-1.86989	-2.39635	-1.50453	172	136	143	4	3	6	Bra019087	1	AP2-EREBP	-	-	-	-	-
Bra021049	Bra021049.1	AT4G17490	ATERF6,ERF-6-6	ATERF6 (ETHYLENE RESPONSIVE ELEMENT BINDING FACTOR 6);DNA binding / transcription factor	-2.60124	2.71847	500.382	7.85045e-111	1.19474e-109	3.62289	3.41199	3.5218	1.07295	0.995361	0.862752	329	213	228	43	55	39	Bra021049	1	AP2-EREBP	-	-	-	-	-
Bra010210	Bra010210.1	AT1G33760	-	AP2 domain-containing transcription factor,putative	-4.02874	1.40976	357.9	8.06995e-80	9.71617e-79	2.3416	2.41691	2.30332	-1.271	-1.76611	-1.0418	134	106	97	7	6	9	Bra010210	1	AP2-EREBP	-	-	-	-	-
Bra010881	Bra010881.1	AT1G28360	ERF12,ATERF12	ERF12 (ERF DOMAIN PROTEIN 12);DNA binding / transcription factor/ transcription repressor	-3.22061	1.77034	310.209	1.96623e-69	2.15676e-68	2.47302	2.81262	2.76255	-0.428841	-0.641935	-0.104724	147	140	134	14	16	19	Bra010881	1	AP2-EREBP	-	-	-	-	-
Bra003883	Bra003883.1	AT1G72360	-	ethylene-responsive element-binding protein,putative	2.53113	2.50423	300.088	3.15205e-67	3.39076e-66	0.022203	1.08286	0.665301	3.02808	3.13047	3.06163	25	41	30	172	250	186	Bra003883	1	AP2-EREBP	-	-	-	-	-
Bra018271	Bra018271.1	AT2G31230	ATERF15	ATERF15 (Ethylene-responsive element binding factor 15);DNA binding / transcription activator/ transcription factor	2.13373	2.22189	264.3	1.98259e-59	1.97217e-58	0.784102	0.74167	0.876488	2.95138	2.776	2.94162	44	32	35	163	195	171	Bra018271	1	AP2-EREBP	-	-	-	-	-
Bra031903	Bra031903.1	AT5G64750	ABR1	ABR1 (ABA REPRESSOR1);DNA binding / transcription factor	2.72632	2.02015	241.223	2.12868e-54	1.99554e-53	0.0740859	0.234398	0.305558	3.00296	2.85421	2.46097	26	22	23	169	206	122	Bra031903	1	AP2-EREBP	-	-	-	-	-
Bra028759	Bra028759.1	AT5G05410	DREB2A,DREB2	DREB2A;DNA binding / transcription activator/ transcription factor	-2.36305	2.53264	229.634	7.16408e-52	6.52658e-51	3.32398	2.99411	3.47066	1.13591	0.559051	1.17809	267	159	220	45	40	49	Bra028759	1	AP2-EREBP	-	-	-	-	-
Bra019162	Bra019162.1	AT4G25470	CBF2,DREB1C,FTQ4,ATCBF2	CBF2 (C-REPEAT/DRE BINDING FACTOR 2);DNA binding / transcription activator/ transcription factor	-2.51408	1.38609	200.352	1.74997e-45	1.46533e-44	2.12504	2.24653	2.1654	-0.257198	-0.236224	-0.175343	115	94	88	16	22	18	Bra019162	1	AP2-EREBP	-	-	-	-	-
Bra025719	Bra025719.1	AT1G19210	-	AP2 domain-containing transcription factor,putative	-4.57052	0.370876	186.746	1.63197e-42	1.30554e-41	1.25782	1.30172	1.3983	-1.86989	-2.68725	-2.93993	62	48	51	4	2	1	Bra025719	1	AP2-EREBP	-	-	-	-	-
Bra021712	Bra021712.1	AT2G31230	ATERF15	ATERF15 (Ethylene-responsive element binding factor 15);DNA binding / transcription activator/ transcription factor	3.31568	0.911129	184.071	6.26053e-42	4.96923e-41	-1.12741	-1.81519	-1.19796	1.83125	1.75745	1.4833	10	4	7	74	95	61	Bra021712	1	AP2-EREBP	-	-	-	-	-
Bra028690	Bra028690.1	AT5G07580	-	DNA binding / transcription factor	2.85382	0.998511	166.075	5.32697e-38	3.97837e-37	-1.3832	-0.910466	-0.442432	1.71233	1.66579	1.86393	8	9	13	68	89	80	Bra028690	1	AP2-EREBP	-	-	-	-	-
Bra011833	Bra011833.1	AT4G39780	-	AP2 domain-containing transcription factor,putative	2.18359	2.16024	159.384	1.54242e-36	1.1263e-35	1.16518	0.406128	0.417809	2.9774	2.6056	2.72607	58	25	25	166	173	147	Bra011833	1	AP2-EREBP	-	-	-	-	-
Bra030957	Bra030957.1	AT3G15210	ATERF-4,ERF4,RAP2.5,ATERF4	ERF4 (ETHYLENE RESPONSIVE ELEMENT BINDING FACTOR 4);DNA binding / protein binding / transcription factor/ transcription repressor	-3.50557	0.429443	153.324	3.25477e-35	2.32864e-34	1.46634	1.27241	1.12823	-1.64151	-1.94722	-1.69891	72	47	42	5	5	5	Bra030957	1	AP2-EREBP	-	-	-	-	-
Bra006599	Bra006599.1	AT5G21960	-	AP2 domain-containing transcription factor,putative	-4.10502	0.260014	131.046	2.41931e-30	1.58261e-29	0.845101	1.27241	1.3983	-1.64151	-2.39635	-2.93993	46	47	51	5	3	1	Bra006599	1	AP2-EREBP	-	-	-	-	-
Bra039658	Bra039658.1	AT3G15210	ATERF-4,ERF4,RAP2.5,ATERF4	ERF4 (ETHYLENE RESPONSIVE ELEMENT BINDING FACTOR 4);DNA binding / protein binding / transcription factor/ transcription repressor	-2.78821	0.707807	125.288	4.4023e-29	2.80846e-28	1.50465	1.2425	1.78069	-1.271	-1.09719	-0.799434	74	46	67	7	11	11	Bra039658	1	AP2-EREBP	-	-	-	-	-
Bra026963	Bra026963.1	AT1G12610	DDF1	DDF1 (DWARF AND DELAYED FLOWERING 1);DNA binding / sequence-specific DNA binding / transcription factor	-5.19729	-0.156745	118.9	1.10154e-27	6.84491e-27	0.720411	1.27241	0.571336	-2.91251	-3.05201	-2.93993	42	47	28	1	1	1	Bra026963	1	AP2-EREBP	-	-	-	-	-
Bra006195	Bra006195.1	AT5G13330	Rap2.6L	Rap2.6L (related to AP2 6L);DNA binding / transcription factor	2.57512	0.672203	104.036	1.98721e-24	1.15051e-23	-0.910214	-0.66394	-2.08382	1.53679	1.30986	1.17809	12	11	3	60	69	49	Bra006195	1	AP2-EREBP	-	-	-	-	-
Bra032433	Bra032433.1	AT1G06160	ORA59	ORA59 (OCTADECANOID-RESPONSIVE ARABIDOPSIS AP2/ERF 59);DNA binding / transcription activator/ transcription factor	3.97566	-0.152113	102.987	3.37297e-24	1.94121e-23	-3.02241	-2.09175	-2.42749	0.6235	0.779131	0.504538	1	3	2	31	47	30	Bra032433	1	AP2-EREBP	-	-	-	-	-
Bra027612	Bra027612.1	AT1G63030	ddf2	ddf2 (DWARF AND DELAYED FLOWERING 2);DNA binding / transcription factor	-7.03991	-1.23825	68.3588	1.36295e-16	6.36436e-16	-0.477883	-0.453457	-0.095582	-3.54139	-3.54139	-3.54139	17	13	17	0	0	0	Bra027612	1	AP2-EREBP	-	-	-	-	-
Bra022832	Bra022832.1	AT2G31230	ATERF15	ATERF15 (Ethylene-responsive element binding factor 15);DNA binding / transcription activator/ transcription factor	2.02303	0.594864	60.2821	8.21925e-15	3.60861e-14	-0.721478	-1.38344	0.0508783	1.38952	1.09242	0.964792	14	6	19	54	59	42	Bra022832	1	AP2-EREBP	-	-	-	-	-
Bra012345	Bra012345.1	AT1G22810	-	AP2 domain-containing transcription factor,putative	-2.6389	-0.149305	58.147	2.43243e-14	1.04927e-13	0.472339	0.607297	0.521954	-2.47601	-0.99392	-1.92362	35	29	27	2	12	4	Bra012345	1	AP2-EREBP	-	-	-	-	-
Bra005852	Bra005852.1	AT5G05410	DREB2A,DREB2	DREB2A;DNA binding / transcription activator/ transcription factor	-3.69157	-1.03352	52.6176	4.05242e-13	1.66984e-12	-0.335699	-0.186066	-0.095582	-2.47601	-3.54139	-2.51671	19	16	17	2	0	2	Bra005852	1	AP2-EREBP	-	-	-	-	-
Bra016518	Bra016518.1	AT1G19210	-	AP2 domain-containing transcription factor,putative	-4.93862	-1.4225	48.791	2.84743e-12	1.13448e-11	-0.477883	-1.05157	-0.347594	-3.54139	-3.54139	-2.93993	17	8	14	0	0	1	Bra016518	1	AP2-EREBP	-	-	-	-	-
Bra029889	Bra029889.1	AT3G11020	DREB2B,DREB2	DREB2B (DRE/CRT-BINDING PROTEIN 2B);DNA binding / transcription activator/ transcription factor	-2.26849	-0.396299	45.7677	1.33138e-11	5.15024e-11	0.351405	-0.0318899	0.521954	-1.64151	-1.76611	-1.50453	32	18	27	5	6	6	Bra029889	1	AP2-EREBP	-	-	-	-	-
Bra029302	Bra029302.1	AT5G61890	-	AP2 domain-containing transcription factor family protein	2.25427	-0.401487	42.7119	6.34267e-11	2.37609e-10	-1.87932	-1.58322	-1.57394	0.0994213	0.416362	0.0884959	5	5	5	21	36	22	Bra029302	1	AP2-EREBP	-	-	-	-	-
Bra004873	Bra004873.1	AT2G44840	ATERF13,EREBP,ERF13	ERF13 (ETHYLENE-RESPONSIVE ELEMENT BINDING FACTOR 13);DNA binding / transcription factor	-3.21987	-1.14651	41.3023	1.30416e-10	4.81866e-10	-0.269539	-0.554863	-0.347594	-2.47601	-2.68725	-2.93993	20	12	14	2	2	1	Bra004873	1	AP2-EREBP	-	-	-	-	-
Bra015478	Bra015478.1	AT1G06160	ORA59	ORA59 (OCTADECANOID-RESPONSIVE ARABIDOPSIS AP2/ERF 59);DNA binding / transcription activator/ transcription factor	4.50242	-1.60677	35.2427	2.91075e-09	1.00957e-08	-3.54139	-2.88408	-3.54139	-0.522982	-0.897551	-1.33326	0	1	0	13	13	7	Bra015478	1	AP2-EREBP	-	-	-	-	-
Bra010461	Bra010461.1	AT4G25480	DREB1A,CBF3,ATCBF3	DREB1A (DEHYDRATION RESPONSE ELEMENT B1A);DNA binding / transcription activator/ transcription factor	-4.18607	-1.94601	26.6365	2.45556e-07	7.66737e-07	-1.12741	-1.20798	-1.37374	-3.54139	-3.54139	-2.93993	10	7	6	0	0	1	Bra010461	1	AP2-EREBP	-	-	-	-	-
Bra017302	Bra017302.1	AT4G16750	-	DRE-binding transcription factor,putative	2.21068	-1.02225	22.3478	2.27468e-06	6.67591e-06	-2.64153	-1.38344	-2.42749	-0.103822	-0.807219	-0.498479	2	6	2	18	14	14	Bra017302	1	AP2-EREBP	-	-	-	-	-
Bra024325	Bra024325.1	AT5G64750	ABR1	ABR1 (ABA REPRESSOR1);DNA binding / transcription factor	3.79488	-2.09144	18.8051	1.44781e-05	3.99557e-05	-3.02241	-3.54139	-3.54139	-0.976457	-1.60522	-1.92362	1	0	0	9	7	4	Bra024325	1	AP2-EREBP	-	-	-	-	-
Bra031880	Bra031880.1	AT5G65130	-	AP2 domain-containing transcription factor,putative	-4.95876	-2.61565	14.5861	0.000133896	0.000341495	-1.5304	-2.43419	-2.42749	-3.54139	-3.54139	-3.54139	7	2	2	0	0	0	Bra031880	1	AP2-EREBP	-	-	-	-	-
Bra008040	Bra008040.1	AT1G72570	-	DNA binding / transcription factor	-4.848	-2.63653	14.5333	0.000137706	0.000350632	-2.34049	-1.58322	-2.42749	-3.54139	-3.54139	-3.54139	3	5	2	0	0	0	Bra008040	1	AP2-EREBP	-	-	-	-	-
Bra024358	Bra024358.1	AT5G65130	-	AP2 domain-containing transcription factor,putative	-4.56302	-2.75596	10.7992	0.00101546	0.002374	-3.02241	-1.81519	-2.08382	-3.54139	-3.54139	-3.54139	1	4	3	0	0	0	Bra024358	1	AP2-EREBP	-	-	-	-	-
Bra001411	Bra001411.1	AT3G11580	-	DNA-binding protein,putative	2.30281	2.63433	316.244	9.52692e-71	1.05928e-69	0.547674	1.11623	1.22398	3.27186	3.16993	3.35888	37	42	45	204	257	229	Bra001411	1	ABI3/VP1	-	-	-	-	-
Bra040478	Bra040478.1	AT2G46870	NGA1	NGA1 (NGATHA1);transcription factor	2.03631	2.01013	211.819	5.50863e-48	4.77169e-47	0.653777	0.653492	0.710084	2.60703	2.6138	2.73573	40	30	31	128	174	148	Bra040478	1	ABI3/VP1	-	-	-	-	-
Bra009171	Bra009171.1	AT5G06250	-	transcription factor	3.08509	0.347661	114.358	1.08797e-26	6.61711e-26	-1.69433	-1.58322	-1.57394	1.0404	1.1157	1.14948	6	5	5	42	60	48	Bra009171	1	ABI3/VP1	-	-	-	-	-
Bra011110	Bra011110.1	AT4G34400	-	DNA binding / transcription factor	-2.89071	-2.20298	13.432	0.000247362	0.00061448	-1.69433	-1.58322	-1.57394	-2.91251	-3.05201	-3.54139	6	5	5	1	1	0	Bra011110	1	ABI3/VP1	-	-	-	-	-
Bra000056	Bra000056.1	AT2G38360	PRA1.B4	PRA1.B4 (PRENYLATED RAB ACCEPTOR 1.B4)	-2.34598	5.70609	2748.07	0	0	6.48706	6.54267	6.4252	4.19325	4.13766	4.11093	2410	1879	1717	388	505	387	Bra000056	1	-	-	-	-	-	-
Bra000140	Bra000140.1	AT2G39650	-	unknown protein	-3.48066	4.69991	3044.24	0	0	5.61861	5.6624	5.5755	2.24233	2.14455	2.10647	1319	1020	952	99	125	95	Bra000140	1	-	-	-	-	-	-
Bra000158	Bra000158.1	AT2G40000	HSPRO2,ATHSPRO2	HSPRO2 (ARABIDOPSIS ORTHOLOG OF SUGAR BEET HS1 PRO-1 2)	-3.79498	8.33046	22950.5	0	0	9.21892	9.23423	9.24873	5.43647	5.39063	5.51168	16023	12148	12165	921	1207	1025	Bra000158	1	-	-	-	-	-	-
Bra000310	Bra000310.1	AT2G43570	-	chitinase,putative	3.74083	6.11484	5677.12	0	0	3.36621	3.05561	2.97928	6.81406	6.84373	6.84234	275	166	156	2396	3309	2581	Bra000310	1	-	-	-	-	-	-
Bra000311	Bra000311.1	AT2G43590	-	chitinase,putative	3.74683	5.60655	5213.34	0	0	2.68807	2.78176	2.7303	6.45215	6.49003	6.43008	171	137	131	1864	2589	1939	Bra000311	1	-	-	-	-	-	-
Bra000315	Bra000315.1	AT2G43620	-	chitinase,putative	3.02509	4.29439	1560.61	0	0	2.16147	2.05331	1.99491	5.01873	5.14973	5.05624	118	82	78	689	1021	747	Bra000315	1	-	-	-	-	-	-
Bra000382	Bra000382.1	AT2G45220	-	pectinesterase family protein	4.37344	4.3338	2419.77	0	0	0.903624	0.293942	1.06067	5.11173	5.15395	5.19218	48	23	40	735	1024	821	Bra000382	1	-	-	-	-	-	-
Bra000508	Bra000508.1	AT2G27500	-	glycosyl hydrolase family 17 protein	-3.33758	7.90389	15825.8	0	0	8.7736	8.82084	8.78656	5.46127	5.46276	5.4485	11767	9121	8830	937	1269	981	Bra000508	1	-	-	-	-	-	-
Bra000571	Bra000571.1	AT2G23810	TET8	TET8 (TETRASPANIN8)	-2.70524	7.371	8417.71	0	0	8.21562	8.15462	8.19961	5.44271	5.53684	5.47035	7992	5747	5878	925	1336	996	Bra000571	1	-	-	-	-	-	-
Bra000635	Bra000635.1	AT4G07960	ATCSLC12,CSLC12	ATCSLC12 (CELLULOSE-SYNTHASE LIKE C12);cellulose synthase/ transferase,transferring glycosyl groups	-3.30213	4.28159	1817.24	0	0	5.0984	5.0892	5.06118	1.69152	1.72754	2.19311	919	685	666	67	93	101	Bra000635	1	-	-	-	-	-	-
Bra000660	Bra000660.1	AT4G08950	EXO	EXO (EXORDIUM)	-3.48958	8.28648	28995.6	0	0	9.19349	9.17546	9.18696	5.67113	5.7103	5.70837	15743	11663	11655	1084	1507	1175	Bra000660	1	-	-	-	-	-	-
Bra000670	Bra000670.1	arabinogalactan protein 10 [Source:TAIR%3BAcc:AT4G09030]	-	arabinogalactan protein 10 [Source:TAIR%3BAcc:AT4G09030](projected from arabidopsis_thaliana%2CAT4G09030)	-3.72427	6.58241	7226.18	0	0	7.49888	7.50941	7.42196	3.59122	3.87319	3.75041	4862	3674	3428	255	420	301	Bra000670	1	-	-	-	-	-	-
Bra000708	Bra000708.1	AT4G10340	LHCB5	LHCB5 (LIGHT HARVESTING COMPLEX OF PHOTOSYSTEM II 5);chlorophyll binding	-2.05672	9.24261	12385.8	0	0	9.94697	9.91935	9.96057	7.89028	7.90086	7.86508	26542	19533	19926	5054	6888	5246	Bra000708	1	-	-	-	-	-	-
Bra000775	Bra000775.1	AT4G12480	pEARLI 1	pEARLI 1;lipid binding	3.59572	5.37569	4683.71	0	0	2.58455	2.69607	2.65213	6.2446	6.20675	6.20533	159	129	124	1614	2127	1659	Bra000775	1	-	-	-	-	-	-
Bra000811	Bra000811.1	AT4G05010	-	F-box family protein	-2.96143	5.24305	2695.86	0	0	6.20164	6.11962	6.07117	3.2	3.10743	3.25529	1977	1401	1343	194	246	213	Bra000811	1	-	-	-	-	-	-
Bra000875	Bra000875.1	AT2G02930	ATGSTF3,GST16	ATGSTF3 (GLUTATHIONE S-TRANSFERASE F3);glutathione transferase	3.01069	6.39792	6503.59	0	0	4.21754	4.11157	4.22774	7.17237	7.18955	7.22134	498	347	373	3072	4206	3357	Bra000875	1	-	-	-	-	-	-
Bra000876	Bra000876.1	AT4G02520	ATGSTF2,ATPM24.1,ATPM24,GST2	ATGSTF2 (GLUTATHIONE S-TRANSFERASE PHI 2);glutathione binding / glutathione transferase	4.31664	5.27693	5162.85	0	0	1.85537	1.85013	1.92064	6.15624	6.17317	6.14592	95	71	74	1518	2078	1592	Bra000876	1	-	-	-	-	-	-
Bra000903	Bra000903.1	AT4G01950	ATGPAT3,GPAT3	GPAT3 (GLYCEROL-3-PHOSPHATE ACYLTRANSFERASE 3);acyltransferase	-4.6488	6.29086	9756.8	0	0	7.23539	7.21669	7.20884	2.66155	2.39341	2.70657	4050	2999	2957	133	149	145	Bra000903	1	-	-	-	-	-	-
Bra001067	Bra001067.1	AT3G02840	-	immediate-early fungal elicitor family protein	-3.60165	4.11752	1690.85	0	0	5.01955	4.99815	4.89414	1.19625	1.36918	1.75421	870	643	593	47	72	74	Bra001067	1	-	-	-	-	-	-
Bra001086	Bra001086.1	-	-	-	2.17674	9.43888	6264.74	0	0	8.0631	8.02911	7.99117	10.1357	10.2266	10.2241	7190	5268	5087	23972	34542	26921	Bra001086	1	-	-	-	-	-	-
Bra001122	Bra001122.1	AT3G04720	PR4,HEL,PR-4	PR4 (PATHOGENESIS-RELATED 4);chitin binding	4.72944	6.30648	9671.48	0	0	2.42388	2.4695	2.62899	7.18079	7.22209	7.22691	142	110	122	3090	4302	3370	Bra001122	1	-	-	-	-	-	-
Bra001155	Bra001155.1	AT3G05580	-	serine/threonine protein phosphatase,putative	-2.98793	5.00425	2421.38	0	0	5.96537	5.82639	5.97811	2.96878	2.98637	2.93325	1678	1143	1259	165	226	170	Bra001155	1	-	-	-	-	-	-
Bra001320	Bra001320.1	AT3G09260	PYK10,PSR3.1,BGLU23	PYK10;beta-glucosidase/ copper ion binding / fucosidase/ hydrolase,hydrolyzing O-glycosyl compounds	-2.21194	5.55414	2436.06	0	0	6.35631	6.27083	6.27401	4.09763	4.11474	4.07715	2201	1556	1546	363	497	378	Bra001320	1	-	-	-	-	-	-
Bra001422	Bra001422.1	AT3G11820	SYP121,AT-SYR1,ATSYP121,SYR1,ATSYR1,PEN1	SYP121 (SYNTAXIN OF PLANTS 121);SNAP receptor/ protein anchor	-3.09588	7.0532	7950.55	0	0	7.80096	7.8301	7.85011	4.75604	4.78251	4.55449	5995	4589	4613	574	791	527	Bra001422	1	-	-	-	-	-	-
Bra001457	Bra001457.1	AT3G12580	HSP70	HSP70 (heat shock protein 70);ATP binding	-2.4965	7.45755	10866.6	0	0	8.24615	8.24178	8.25214	5.72332	5.75546	5.77426	8163	6105	6096	1124	1555	1230	Bra001457	1	-	-	-	-	-	-
Bra001488	Bra001488.1	AT3G13080	ATMRP3,MRP3	ATMRP3;ATPase,coupled to transmembrane movement of substances / chlorophyll catabolite transporter/ glutathione S-conjugate-exporting ATPase	2.08337	5.08721	1747.44	0	0	3.59653	3.76222	3.67649	5.72716	5.78662	5.72057	323	272	254	1127	1589	1185	Bra001488	1	-	-	-	-	-	-
Bra001635	Bra001635.1	AT3G16510	-	C2 domain-containing protein	-2.08317	5.72294	3042.03	0	0	6.44704	6.46466	6.42855	4.35417	4.42304	4.30823	2344	1780	1721	434	616	444	Bra001635	1	-	-	-	-	-	-
Bra001639	Bra001639.1	AT3G16720	ATL2	ATL2;protein binding / zinc ion binding	-2.25825	4.7412	1788.98	0	0	5.48365	5.52005	5.50418	3.13983	3.30263	3.28847	1201	924	906	186	282	218	Bra001639	1	-	-	-	-	-	-
Bra001653	Bra001653.1	AT3G16660	-	unknown protein	2.02926	8.39937	6807.86	0	0	7.08189	7.07272	7.07934	9.07537	9.15025	9.10198	3641	2714	2703	11494	16379	12367	Bra001653	1	-	-	-	-	-	-
Bra001752	Bra001752.1	AT3G19580	AZF2	AZF2 (ARABIDOPSIS ZINC-FINGER PROTEIN 2);DNA binding / nucleic acid binding / transcription factor/ transcription repressor/ zinc ion binding	-4.12117	5.11212	4854.51	0	0	6.06409	6.1093	6.05932	2.02667	1.89834	2.04567	1797	1391	1332	85	105	91	Bra001752	1	-	-	-	-	-	-
Bra001774	Bra001774.1	AT3G20080	CYP705A15	CYP705A15;electron carrier/ heme binding / iron ion binding / monooxygenase/ oxygen binding	2.6174	5.98303	3176.32	0	0	4.12525	3.97272	3.80074	6.57724	6.59366	6.63098	467	315	277	2033	2782	2229	Bra001774	1	-	-	-	-	-	-
Bra001789	Bra001789.1	AT3G20410	CPK9	CPK9 (calmodulin-domain protein kinase 9);calmodulin-dependent protein kinase/ kinase	-2.31436	8.00715	8459.11	0	0	8.679	8.68913	8.71232	6.46906	6.37234	6.33801	11020	8325	8387	1886	2386	1819	Bra001789	1	-	-	-	-	-	-
Bra001905	Bra001905.1	AT3G23170	-	unknown protein	-2.44389	4.56747	1780.32	0	0	5.3624	5.36036	5.35001	2.76476	2.95444	3.03059	1104	827	814	143	221	182	Bra001905	1	-	-	-	-	-	-
Bra001921	Bra001921.1	AT3G23810	SAHH2,ATSAHH2	SAHH2 (S-ADENOSYL-L-HOMOCYSTEINE (SAH) HYDROLASE 2);adenosylhomocysteinase/ binding / catalytic	2.12583	6.22441	3377.92	0	0	4.77503	4.74437	4.80664	6.91119	6.92545	6.85181	734	539	558	2563	3502	2598	Bra001921	1	-	-	-	-	-	-
Bra002049	Bra002049.1	AT2G17300	-	unknown protein	-2.77699	5.37463	3407.9	0	0	6.18108	6.2456	6.22663	3.43097	3.37676	3.5461	1949	1529	1496	228	297	261	Bra002049	1	-	-	-	-	-	-
Bra002189	Bra002189.1	AT5G18840	-	sugar transporter,putative	3.78244	5.4958	4657.71	0	0	2.59346	2.60497	2.55727	6.30835	6.38617	6.34749	160	121	116	1687	2409	1831	Bra002189	1	-	-	-	-	-	-
Bra002283	Bra002283.1	AT5G20230	ATBCB,BCB	ATBCB (ARABIDOPSIS BLUE-COPPER-BINDING PROTEIN);copper ion binding / electron carrier	-3.7908	4.35092	2196.89	0	0	5.3637	5.23874	5.25875	1.75306	1.49877	1.36387	1105	760	764	70	79	56	Bra002283	1	-	-	-	-	-	-
Bra002316	Bra002316.1	AT5G20630	GLP3,GLP3A,GLP3B,ATGER3,GER3	GER3 (GERMIN 3);oxalate oxidase	3.04896	4.64847	2101.43	0	0	2.52986	2.36232	2.28863	5.48866	5.45479	5.37472	153	102	96	955	1262	932	Bra002316	1	-	-	-	-	-	-
Bra002322	Bra002322.1	AT5G20700	-	senescence-associated protein-related	2.57109	5.54078	2056.7	0	0	3.83698	3.5466	3.50284	6.12068	6.14939	6.22088	382	234	225	1481	2044	1677	Bra002322	1	-	-	-	-	-	-
Bra002355	Bra002355.1	AT5G21100	-	L-ascorbate oxidase,putative	3.76795	4.67462	2531.16	0	0	1.89918	1.68202	1.86232	5.65106	5.54007	5.51868	98	63	71	1069	1339	1030	Bra002355	1	-	-	-	-	-	-
Bra002400	Bra002400.1	AT5G22250	-	CCR4-NOT transcription complex protein,putative	-2.66027	6.3261	4841.82	0	0	7.07951	7.12335	7.06649	4.56905	4.4277	4.34969	3635	2811	2679	504	618	457	Bra002400	1	-	-	-	-	-	-
Bra002559	Bra002559.1	AT5G59550	-	zinc finger (C3HC4-type RING finger) family protein	-2.45622	7.64476	9165.27	0	0	8.43501	8.44259	8.39934	5.91391	6.00571	5.98321	9305	7017	6751	1283	1850	1422	Bra002559	1	-	-	-	-	-	-
Bra002718	Bra002718.1	AT5G57560	TCH4,XTH22	TCH4 (Touch 4);hydrolase,acting on glycosyl bonds / xyloglucan:xyloglucosyl transferase	-3.98563	7.50141	12198.9	0	0	8.47987	8.57093	8.55952	4.55472	4.56299	4.57076	9599	7670	7544	499	679	533	Bra002718	1	-	-	-	-	-	-
Bra002719	Bra002719.1	AT5G57560	TCH4,XTH22	TCH4 (Touch 4);hydrolase,acting on glycosyl bonds / xyloglucan:xyloglucosyl transferase	-4.13564	7.08194	12142.9	0	0	8.05928	8.03703	8.11342	4.00368	3.92682	3.89097	7171	5297	5537	340	436	332	Bra002719	1	-	-	-	-	-	-
Bra002944	Bra002944.1	AT5G54940	-	eukaryotic translation initiation factor SUI1,putative	-2.1197	7.78813	7219.5	0	0	8.51314	8.47872	8.53484	6.38163	6.42454	6.35768	9823	7195	7416	1775	2474	1844	Bra002944	1	-	-	-	-	-	-
Bra002984	Bra002984.1	AT4G27280	-	calcium-binding EF hand family protein	-2.38975	8.36993	7807.34	0	0	9.09804	9.14597	9.16764	6.80197	6.72339	6.72547	14735	11427	11500	2376	3044	2380	Bra002984	1	-	-	-	-	-	-
Bra002999	Bra002999.1	AT5G54270	LHCB3,LHCB3*1	LHCB3 (LIGHT-HARVESTING CHLOROPHYLL B-BINDING PROTEIN 3);structural molecule	-3.19806	11.2579	1.52589e+06	0	0	12.1195	12.1036	12.116	8.92637	8.90666	8.91468	119665	88783	88778	10366	13834	10861	Bra002999	1	-	-	-	-	-	-
Bra003115	Bra003115.1	AT5G52750	-	heavy-metal-associated domain-containing protein	-2.27647	4.9304	2020.83	0	0	5.66798	5.67645	5.7411	3.45586	3.36224	3.47295	1365	1030	1068	232	294	248	Bra003115	1	-	-	-	-	-	-
Bra003187	Bra003187.1	AT3G54500	-	FUNCTIONS IN: molecular_function unknown;INVOLVED IN: biological_process unknown;LOCATED IN: cellular_component unknown;EXPRESSED IN: 22 plant structures;EXPRESSED DURING: 13 growth stages;BEST Arabidopsis thaliana protein match is: dentin sialophosphoprotein-related (TAIR:AT5G64170.2);Has 108 Blast hits to 102 proteins in 33 species: Archae - 0;Bacteria - 4;Metazoa - 36;Fungi - 7;Plants - 52;Vir…	-2.71697	6.43899	5693.01	0	0	7.30828	7.2358	7.30229	4.54895	4.584	4.58151	4260	3039	3155	497	689	537	Bra003187	1	-	-	-	-	-	-
Bra003212	Bra003212.1	AT3G55430	-	glycosyl hydrolase family 17 protein / beta-1%2C3-glucanase,putative	-2.75384	5.00304	2334.18	0	0	5.91202	5.91083	5.79146	3.1166	3.17548	3.11439	1617	1212	1106	183	258	193	Bra003212	1	-	-	-	-	-	-
Bra003273	Bra003273.1	AT3G57240	BG3	BG3 (BETA-1%2C3-GLUCANASE 3);cellulase/ hydrolase,hydrolyzing O-glycosyl compounds	3.94283	7.49182	13085.5	0	0	4.44145	4.52895	4.44202	8.45147	8.39341	8.38444	582	464	433	7458	9692	7520	Bra003273	1	-	-	-	-	-	-
Bra003306	Bra003306.1	AT3G57930	-	unknown protein	-2.52358	5.0242	2145.51	0	0	5.76982	5.86862	5.86137	3.3336	3.31274	3.30153	1465	1177	1161	213	284	220	Bra003306	1	-	-	-	-	-	-
Bra003363	Bra003363.1	AT3G59080	-	aspartyl protease family protein	-3.01018	4.85472	2439.99	0	0	5.76785	5.7367	5.65782	2.5733	2.80493	2.77371	1463	1074	1008	125	199	152	Bra003363	1	-	-	-	-	-	-
Bra003375	Bra003375.1	AT3G59400	GUN4	GUN4;enzyme binding / tetrapyrrole binding	-2.54012	6.24406	5169.03	0	0	7.06516	7.01639	7.05405	4.49893	4.48469	4.55449	3599	2610	2656	480	643	527	Bra003375	1	-	-	-	-	-	-
Bra003670	Bra003670.1	AT1G77760	NIA1,GNR1,NR1	NIA1 (NITRATE REDUCTASE 1);nitrate reductase	-3.6863	7.86363	16646.8	0	0	8.81051	8.7649	8.766	5.08006	5.10099	5.11291	12072	8774	8705	719	987	777	Bra003670	1	-	-	-	-	-	-
Bra003680	Bra003680.1	AT1G77520	-	O-methyltransferase family 2 protein	2.14262	6.12406	2948.02	0	0	4.70887	4.63061	4.63146	6.79101	6.84721	6.75662	701	498	494	2358	3317	2432	Bra003680	1	-	-	-	-	-	-
Bra003696	Bra003696.1	-	-	-	5.98053	5.5146	6457.31	0	0	0.351405	0.903337	0.305558	6.36119	6.41284	6.38708	32	36	23	1750	2454	1882	Bra003696	1	-	-	-	-	-	-
Bra003713	Bra003713.1	AT1G76610	-	unknown protein	-4.36167	5.11238	4688.35	0	0	6.10986	6.04034	6.11242	1.58271	1.77217	1.89872	1855	1326	1382	62	96	82	Bra003713	1	-	-	-	-	-	-
Bra003833	Bra003833.1	AT1G73680	-	pathogen-responsive alpha-dioxygenase,putative	-2.2155	4.58407	1420.22	8.48950265061963e-311	0	5.33873	5.27428	5.39184	3.26483	3.0781	3.06163	1086	779	838	203	241	186	Bra003833	1	-	-	-	-	-	-
Bra003975	Bra003975.1	AT1G69890	-	FUNCTIONS IN: molecular_function unknown;INVOLVED IN: biological_process unknown;EXPRESSED IN: 21 plant structures;EXPRESSED DURING: 13 growth stages;CONTAINS InterPro DOMAIN/s: Protein of unknown function DUF569 (InterPro:IPR007679),Actin_cross-linking (InterPro:IPR008999);BEST Arabidopsis thaliana protein match is: unknown protein (TAIR:AT1G27100.1);Has 121 Blast hits to 109 proteins in 8 speci…	-2.30488	6.45976	4888	0	0	7.2261	7.24902	7.19118	4.92602	4.89274	4.95035	4024	3067	2921	646	854	694	Bra003975	1	-	-	-	-	-	-
Bra004137	Bra004137.1	AT1G65960	GAD2	GAD2 (GLUTAMATE DECARBOXYLASE 2);calmodulin binding / glutamate decarboxylase	2.06	8.17341	12750.1	0	0	6.76178	6.78111	6.82383	8.83563	8.84673	8.85544	2916	2217	2264	9734	13271	10424	Bra004137	1	-	-	-	-	-	-
Bra004477	Bra004477.1	AT2G47140	-	short-chain dehydrogenase/reductase (SDR) family protein	2.60848	5.58184	3053.93	0	0	3.60977	3.83919	3.69888	6.33962	6.27296	6.30516	326	287	258	1724	2227	1778	Bra004477	1	-	-	-	-	-	-
Bra004534	Bra004534.1	AT2G46490	-	unknown protein	-2.03306	5.27361	1551.83	0	0	5.95416	6.09367	6.06902	4.06564	4.01303	3.97488	1665	1376	1341	355	463	352	Bra004534	1	-	-	-	-	-	-
Bra004633	Bra004633.1	AT2G41640	-	transferase,transferring glycosyl groups	-3.78147	5.9534	7715.22	0	0	6.8998	6.87306	6.90312	3.12439	3.16993	3.06163	3209	2363	2392	184	257	186	Bra004633	1	-	-	-	-	-	-
Bra004718	Bra004718.1	AT2G42810	PAPP5,PP5	PP5.2 (PROTEIN PHOSPHATASE 5.2);phosphoprotein phosphatase/ protein binding / protein serine/threonine phosphatase	3.44241	8.28016	20793.7	0	0	5.71163	5.64963	5.70422	9.11461	9.14513	9.13165	1407	1011	1041	11811	16321	12624	Bra004718	1	-	-	-	-	-	-
Bra004771	Bra004771.1	AT2G43570	-	chitinase,putative	3.88769	7.8365	15630.6	0	0	4.80796	4.86461	4.82457	8.69193	8.7459	8.70153	751	586	565	8811	12375	9369	Bra004771	1	-	-	-	-	-	-
Bra004819	Bra004819.1	AT2G44220	-	unknown protein	4.04784	4.64501	2659.31	0	0	1.23521	1.68202	1.57817	5.42706	5.54222	5.51308	61	63	58	915	1341	1026	Bra004819	1	-	-	-	-	-	-
Bra004841	Bra004841.1	AT2G44500	-	unknown protein	-3.01299	6.69899	7258.48	0	0	7.59856	7.53006	7.5518	4.61674	4.55662	4.4875	5210	3727	3751	521	676	503	Bra004841	1	-	-	-	-	-	-
Bra004855	Bra004855.1	AT2G44670	-	senescence-associated protein-related	2.39571	4.53746	1582.69	0	0	2.78465	2.94852	2.88478	5.2622	5.25569	5.22511	183	154	146	816	1099	840	Bra004855	1	-	-	-	-	-	-
Bra004994	Bra004994.1	AT2G40000	HSPRO2,ATHSPRO2	HSPRO2 (ARABIDOPSIS ORTHOLOG OF SUGAR BEET HS1 PRO-1 2)	-4.75263	6.99883	12257.6	0	0	7.90153	7.9326	7.97147	3.36679	3.119	3.15092	6428	4927	5018	218	248	198	Bra004994	1	-	-	-	-	-	-
Bra005071	Bra005071.1	AT2G38940	ATPT2,PHT1%3B4	ATPT2 (ARABIDOPSIS THALIANA PHOSPHATE TRANSPORTER 2);carbohydrate transmembrane transporter/ inorganic phosphate transmembrane transporter/ phosphate transmembrane transporter/ sugar:hydrogen symporter	4.2581	5.29702	4250.05	0	0	2.0622	1.90844	1.82208	6.11581	6.18559	6.22345	110	74	69	1476	2096	1680	Bra005071	1	-	-	-	-	-	-
Bra005079	Bra005079.1	AT2G38790	-	unknown protein	-3.77401	5.2071	4771.63	0	0	6.1707	6.11859	6.14947	2.49139	2.27434	2.44928	1935	1400	1418	118	137	121	Bra005079	1	-	-	-	-	-	-
Bra005125	Bra005125.1	AT2G38290	ATAMT2,AMT2%3B1	ATAMT2 (AMMONIUM TRANSPORTER 2);ammonium transmembrane transporter/ high affinity secondary active ammonium transmembrane transporter	-3.5126	8.39568	23358.8	0	0	9.3115	9.27889	9.29483	5.79335	5.79205	5.76839	17085	12530	12560	1180	1595	1225	Bra005125	1	-	-	-	-	-	-
Bra005424	Bra005424.1	AT2G34430	LHB1B1,LHCB1.4	LHB1B1;chlorophyll binding	-2.78445	10.7426	18515.5	0	0	11.4917	11.5246	11.5191	8.7519	8.68446	8.73906	77438	59432	58694	9185	11859	9616	Bra005424	1	-	-	-	-	-	-
Bra005425	Bra005425.1	AT2G34430	LHB1B1,LHCB1.4	LHB1B1;chlorophyll binding	-2.54154	11.4966	14011.1	0	0	12.2366	12.209	12.1977	9.62193	9.68717	9.69211	129782	95508	93951	16789	23765	18618	Bra005425	1	-	-	-	-	-	-
Bra005447	Bra005447.1	AT2G34180	CIPK13,SnRK3.7,WL2,ATWL2	CIPK13 (CBL-INTERACTING PROTEIN KINASE 13);ATP binding / kinase/ protein kinase/ protein serine/threonine kinase	-3.46003	4.41431	1772.94	0	0	5.14007	5.15691	5.22443	1.88722	1.1157	1.84621	946	718	746	77	60	79	Bra005447	1	-	-	-	-	-	-
Bra005527	Bra005527.1	AT2G33060	AtRLP27	AtRLP27 (Receptor Like Protein 27);kinase/ protein binding	2.11047	5.24357	2049.79	0	0	3.89583	3.75164	3.68212	5.89469	5.89065	5.88577	398	270	255	1266	1708	1329	Bra005527	1	-	-	-	-	-	-
Bra005572	Bra005572.1	AT2G32210	-	unknown protein	-3.63303	5.64523	5351.96	0	0	6.61023	6.55793	6.54437	2.93377	2.90185	3.03841	2625	1899	1865	161	213	183	Bra005572	1	-	-	-	-	-	-
Bra005641	Bra005641.1	AT2G31790	-	UDP-glucoronosyl/UDP-glucosyl transferase family protein	2.32366	5.06489	2017.06	0	0	3.46668	3.39169	3.49005	5.75751	5.73306	5.81581	295	210	223	1151	1531	1266	Bra005641	1	-	-	Glucosinolate genes	-	-	-
Bra005891	Bra005891.1	AT5G06320	NHL3	NHL3	-3.20365	7.0777	9848.8	0	0	7.88868	7.86764	7.88928	4.71539	4.72312	4.53803	6371	4710	4740	558	759	521	Bra005891	1	-	-	-	-	-	-
Bra006085	Bra006085.1	AT5G11060	KNAT4	KNAT4 (KNOTTED1-LIKE HOMEOBOX GENE 4);transcription activator/ transcription factor	3.3144	4.96792	2128.32	0	0	2.67132	2.52025	2.4818	5.98404	5.86769	5.77893	169	114	110	1347	1681	1234	Bra006085	1	-	-	-	-	-	-
Bra006086	Bra006086.1	AT5G11070	-	unknown protein	5.90721	6.54623	11467.4	0	0	1.40689	1.68202	1.78069	7.48546	7.51007	7.43937	69	63	67	3817	5253	3905	Bra006086	1	-	-	-	-	-	-
Bra006403	Bra006403.1	AT5G17350	-	unknown protein	-3.02504	5.3133	3365.51	0	0	6.22693	6.17906	6.13517	3.22194	3.21373	3.06163	2012	1460	1404	197	265	186	Bra006403	1	-	-	-	-	-	-
Bra006511	Bra006511.1	AT5G19600	SULTR3%3B5	SULTR3%3B5 (SULFATE TRANSPORTER 3%3B5);sulfate transmembrane transporter	2.28615	4.57847	1505.82	0	0	2.92547	2.98511	3.10198	5.21559	5.29063	5.30186	202	158	170	790	1126	886	Bra006511	1	-	-	-	-	-	-
Bra006567	Bra006567.1	AT5G20630	GLP3,GLP3A,GLP3B,ATGER3,GER3	GER3 (GERMIN 3);oxalate oxidase	4.2334	6.20606	8042.87	0	0	2.84563	2.90144	2.87498	7.06067	7.12182	7.07927	191	149	145	2843	4013	3042	Bra006567	1	-	-	-	-	-	-
Bra006598	Bra006598.1	AT5G21940	-	unknown protein	-2.51226	5.59661	2771.66	0	0	6.29956	6.37272	6.33157	4.0079	3.81749	3.72639	2116	1670	1609	341	404	296	Bra006598	1	-	-	-	-	-	-
Bra006709	Bra006709.1	AT5G59550	-	zinc finger (C3HC4-type RING finger) family protein	-2.82466	6.37408	4816.45	0	0	7.14844	7.20801	7.24019	4.40937	4.43002	4.25552	3813	2981	3022	451	619	428	Bra006709	1	-	-	-	-	-	-
Bra006727	Bra006727.1	AT5G59080	-	unknown protein	-3.1139	4.49543	2144.81	0	0	5.33342	5.36036	5.28304	2.04319	2.22167	2.47256	1082	827	777	86	132	123	Bra006727	1	-	-	-	-	-	-
Bra006795	Bra006795.1	AT5G57850	-	aminotransferase class IV family protein	2.08816	7.14685	6485.02	0	0	5.76588	5.6862	5.73298	7.81981	7.81968	7.81615	1461	1037	1062	4813	6511	5071	Bra006795	1	-	-	-	-	-	-
Bra006796	Bra006796.1	AT5G57840	-	transferase family protein	4.52418	6.1059	7452.54	0	0	2.50172	2.65124	2.38844	7.04589	7.04091	6.96848	150	125	103	2814	3794	2817	Bra006796	1	-	-	-	-	-	-
Bra006809	Bra006809.1	AT5G57630	CIPK21,SnRK3.4	CIPK21 (CBL-interacting protein kinase 21);ATP binding / kinase/ protein kinase/ protein serine/threonine kinase	3.29961	5.72025	4848.92	0	0	3.1656	3.24855	3.36261	6.54062	6.56699	6.5075	239	190	204	1982	2731	2046	Bra006809	1	-	-	-	-	-	-
Bra006833	Bra006833.1	AT5G57100	-	transporter-related	-2.97313	4.68193	2529.4	0	0	5.56296	5.51223	5.5664	2.59587	2.47668	2.72607	1269	919	946	127	158	147	Bra006833	1	-	-	-	-	-	-
Bra006949	Bra006949.1	AT3G52800	-	zinc finger (AN1-like) family protein	-2.68423	6.87305	5374.38	0	0	7.72794	7.85039	7.77306	5.10977	5.06107	5.10734	5699	4654	4373	734	960	774	Bra006949	1	-	-	-	-	-	-
Bra006975	Bra006975.1	AT3G53180	-	catalytic/ glutamate-ammonia ligase	2.32218	6.64381	4572.8	0	0	5.06993	4.9341	4.88685	7.28083	7.27507	7.27446	901	615	590	3312	4463	3483	Bra006975	1	-	-	-	-	-	-
Bra006997	Bra006997.1	AT3G53420	PIP2A,PIP2,PIP2%3B1	PIP2A (PLASMA MEMBRANE INTRINSIC PROTEIN 2A);water channel	-2.09094	5.29874	1859.59	0	0	6.07527	5.99172	5.99291	3.84313	4.02538	3.91666	1811	1282	1272	304	467	338	Bra006997	1	-	-	-	-	-	-
Bra007039	Bra007039.1	AT3G54000	-	FUNCTIONS IN: molecular_function unknown;INVOLVED IN: biological_process unknown;LOCATED IN: cellular_component unknown;EXPRESSED IN: 22 plant structures;EXPRESSED DURING: 12 growth stages;CONTAINS InterPro DOMAIN/s: Uncharacterised conserved protein UCP022260 (InterPro:IPR016802);BEST Arabidopsis thaliana protein match is: unknown protein (TAIR:AT5G59050.1);Has 43 Blast hits to 43 proteins in 9 …	-3.55188	5.4342	4395.88	0	0	6.39699	6.31101	6.35291	2.83286	2.89514	2.70657	2264	1600	1633	150	212	145	Bra007039	1	-	-	-	-	-	-
Bra007162	Bra007162.1	AT3G55430	-	glycosyl hydrolase family 17 protein / beta-1%2C3-glucanase,putative	-2.54985	5.97829	4015.3	0	0	6.77261	6.71594	6.74465	4.06564	4.22321	4.26888	2938	2119	2143	355	536	432	Bra007162	1	-	-	-	-	-	-
Bra007195	Bra007195.1	AT3G55840	-	FUNCTIONS IN: molecular_function unknown;INVOLVED IN: biological_process unknown;LOCATED IN: cellular_component unknown;EXPRESSED IN: 10 plant structures;EXPRESSED DURING: 6 growth stages;CONTAINS InterPro DOMAIN/s: Hs1pro-1,C-terminal (InterPro:IPR009743),Hs1pro-1,N-terminal (InterPro:IPR009869);BEST Arabidopsis thaliana protein match is: HSPRO2 (ARABIDOPSIS ORTHOLOG OF SUGAR BEET HS1 PRO-1 2) (…	-4.47024	7.15639	16300.3	0	0	8.1368	8.13974	8.10375	3.64632	3.6992	3.64163	7567	5688	5500	265	372	279	Bra007195	1	-	-	-	-	-	-
Bra007202	Bra007202.1	AT3G55950	CCR3,ATCRR3	CCR3 (ARABIDOPSIS THALIANA CRINKLY4 RELATED 3);kinase	-2.89181	4.80387	2655.62	0	0	5.66693	5.66098	5.65209	2.83286	2.8403	2.65662	1364	1019	1004	150	204	140	Bra007202	1	-	-	-	-	-	-
Bra007315	Bra007315.1	AT3G57260	BGL2,PR2,BG2,PR-2	BGL2 (BETA-1%2C3-GLUCANASE 2);cellulase/ glucan 1%2C3-beta-glucosidase/ hydrolase,hydrolyzing O-glycosyl compounds	3.91011	6.80565	11804.2	0	0	3.75988	3.8541	3.70995	7.68419	7.67806	7.66771	362	290	260	4381	5902	4575	Bra007315	1	-	-	-	-	-	-
Bra007328	Bra007328.1	AT3G57450	-	unknown protein	-2.36372	4.77448	1928.63	0	0	5.52851	5.60625	5.52939	3.21466	3.17548	3.21445	1239	981	922	196	258	207	Bra007328	1	-	-	-	-	-	-
Bra007334	Bra007334.1	AT3G57530	CPK32,ATCPK32,CDPK32	CPK32 (CALCIUM-DEPENDENT PROTEIN KINASE 32);calcium-dependent protein kinase C/ calmodulin-dependent protein kinase/ kinase/ protein binding	-4.89487	7.67484	23654.6	0	0	8.59949	8.60384	8.59727	3.54556	3.73722	3.79264	10429	7847	7744	247	382	310	Bra007334	1	-	-	-	-	-	-
Bra007444	Bra007444.1	AT3G59350	-	serine/threonine protein kinase,putative	-3.50636	8.4841	15042.3	0	0	9.35998	9.3023	9.34027	5.78232	5.81623	5.90942	17669	12735	12962	1171	1622	1351	Bra007444	1	-	-	-	-	-	-
Bra007446	Bra007446.1	AT3G59400	GUN4	GUN4;enzyme binding / tetrapyrrole binding	-3.33279	5.56798	5199.87	0	0	6.49183	6.46466	6.45181	3.09299	3.25625	3.06163	2418	1780	1749	180	273	186	Bra007446	1	-	-	-	-	-	-
Bra007603	Bra007603.1	AT3G61430	PIP1A,ATPIP1,PIP1,PIP1%3B1	PIP1A (PLASMA MEMBRANE INTRINSIC PROTEIN 1A);water channel	-3.2367	5.04744	3383.39	0	0	5.97904	5.91202	5.92568	2.86109	2.64613	2.67681	1694	1213	1214	153	178	142	Bra007603	1	-	-	-	-	-	-
Bra007696	Bra007696.1	AT3G62720	ATXT1,XT1,XXT1	XT1 (XYLOSYLTRANSFERASE 1);UDP-xylosyltransferase/ transferase/ transferase,transferring glycosyl groups / xyloglucan 6-xylosyltransferase	-3.49505	6.03619	6486.36	0	0	6.98612	6.93807	6.92347	3.46815	3.5145	3.40196	3407	2472	2426	234	327	236	Bra007696	1	-	-	-	-	-	-
Bra007798	Bra007798.1	AT2G25460	-	FUNCTIONS IN: molecular_function unknown;INVOLVED IN: biological_process unknown;LOCATED IN: cellular_component unknown;EXPRESSED IN: male gametophyte,root,carpel,stamen;EXPRESSED DURING: M germinated pollen stage,4 anthesis;CONTAINS InterPro DOMAIN/s: C2 calcium-dependent membrane targeting (InterPro:IPR000008);BEST Arabidopsis thaliana protein match is: unknown protein (TAIR:AT5G04860.1);Has 53…	-3.49316	3.92616	1543.82	0	0	4.74333	4.75765	4.77273	1.73284	1.22677	1.14948	718	544	545	69	65	48	Bra007798	1	-	-	-	-	-	-
Bra007841	Bra007841.1	AT2G24550	-	unknown protein	-2.04461	6.81021	4241.89	0	0	7.48667	7.56258	7.52346	5.46127	5.5184	5.44997	4821	3812	3678	937	1319	982	Bra007841	1	-	-	-	-	-	-
Bra007864	Bra007864.1	AT1G69530	ATEXPA1,EXP1,AT-EXP1,ATEXP1,ATHEXP ALPHA 1.2	ATEXPA1 (ARABIDOPSIS THALIANA EXPANSIN A1)	2.92623	6.72813	7640.83	0	0	4.53235	4.63637	4.63437	7.49525	7.51829	7.5375	620	500	495	3843	5283	4180	Bra007864	1	-	-	-	-	-	-
Bra007885	Bra007885.1	AT1G69840	-	band 7 family protein	-4.32529	6.35128	10114.5	0	0	7.32242	7.29756	7.34374	2.98597	3.06022	2.96643	4302	3172	3247	167	238	174	Bra007885	1	-	-	-	-	-	-
Bra007887	Bra007887.1	AT1G69890	-	FUNCTIONS IN: molecular_function unknown;INVOLVED IN: biological_process unknown;EXPRESSED IN: 21 plant structures;EXPRESSED DURING: 13 growth stages;CONTAINS InterPro DOMAIN/s: Protein of unknown function DUF569 (InterPro:IPR007679),Actin_cross-linking (InterPro:IPR008999);BEST Arabidopsis thaliana protein match is: unknown protein (TAIR:AT1G27100.1);Has 121 Blast hits to 109 proteins in 8 speci…	-5.66532	5.2753	5355.5	0	0	6.3635	6.33424	6.24862	0.708815	0.592622	0.897573	2212	1626	1519	33	41	40	Bra007887	1	-	-	-	-	-	-
Bra007888	Bra007888.1	AT1G69900	-	FUNCTIONS IN: molecular_function unknown;INVOLVED IN: biological_process unknown;LOCATED IN: cellular_component unknown;CONTAINS InterPro DOMAIN/s: Protein of unknown function DUF569 (InterPro:IPR007679),Actin_cross-linking (InterPro:IPR008999);BEST Arabidopsis thaliana protein match is: unknown protein (TAIR:AT1G27100.1);Has 142 Blast hits to 77 proteins in 8 species: Archae - 0;Bacteria - 0;Met…	-2.21106	5.28665	1850.31	0	0	5.98498	6.01513	5.92092	3.68894	3.9136	3.71668	1701	1303	1210	273	432	294	Bra007888	1	-	-	-	-	-	-
Bra007906	Bra007906.1	AT1G70290	ATTPS8,TPS8,ATTPSC	ATTPS8;alpha%2Calpha-trehalose-phosphate synthase (UDP-forming)/ transferase,transferring glycosyl groups / trehalose-phosphatase	-2.24884	8.3808	12743.9	0	0	9.10537	9.1287	9.13376	6.89592	6.87348	6.85292	14810	11291	11233	2536	3378	2600	Bra007906	1	-	-	-	-	-	-
Bra008025	Bra008025.1	AT1G72290	-	trypsin and protease inhibitor family protein / Kunitz family protein	3.65564	4.77137	3128.07	0	0	1.9965	1.8099	2.13288	5.60729	5.63174	5.60022	105	69	86	1037	1427	1090	Bra008025	1	-	-	-	-	-	-
Bra008037	Bra008037.1	AT1G72520	-	lipoxygenase,putative	-2.95221	6.52099	6909.94	0	0	7.40546	7.38316	7.34107	4.41573	4.4277	4.44987	4557	3366	3241	453	618	490	Bra008037	1	-	-	-	-	-	-
Bra008101	Bra008101.1	AT1G73540	atnudt21	atnudt21 (Arabidopsis thaliana Nudix hydrolase homolog 21);hydrolase	-2.79079	7.91022	7302.34	0	0	8.6748	8.73416	8.75769	5.87982	6.00804	5.91687	10988	8589	8655	1253	1853	1358	Bra008101	1	-	-	-	-	-	-
Bra008267	Bra008267.1	AT1G76600	-	unknown protein	-3.14389	4.36855	1488.48	0	0	5.23001	5.44979	5.33042	2.29846	2.11019	2.22088	1007	880	803	103	122	103	Bra008267	1	-	-	-	-	-	-
Bra008667	Bra008667.1	AT5G15870	-	glycosyl hydrolase family 81 protein	-2.95235	7.71667	11417.3	0	0	8.49274	8.53224	8.50993	5.4628	5.59183	5.58428	9685	7467	7289	938	1388	1078	Bra008667	1	-	-	-	-	-	-
Bra008695	Bra008695.1	AT5G15490	-	UDP-glucose 6-dehydrogenase,putative	-2.40453	7.80341	10109.6	0	0	8.59464	8.55733	8.57095	6.15814	6.20743	6.14139	10394	7598	7604	1520	2128	1587	Bra008695	1	-	-	-	-	-	-
Bra008806	Bra008806.1	AT4G25810	XTR6,XTH23	XTR6 (XYLOGLUCAN ENDOTRANSGLYCOSYLASE 6);hydrolase,acting on glycosyl bonds / hydrolase,hydrolyzing O-glycosyl compounds / xyloglucan:xyloglucosyl transferase	-2.78629	5.67993	3267.03	0	0	6.37259	6.41524	6.4015	3.52218	3.59124	3.9419	2226	1720	1689	243	345	344	Bra008806	1	-	-	-	-	-	-
Bra009013	Bra009013.1	AT5G10695	-	unknown protein	-2.63459	4.34493	1688.33	0	0	5.20696	5.16491	5.11421	2.45482	2.59735	2.57292	991	722	691	115	172	132	Bra009013	1	-	-	-	-	-	-
Bra009037	Bra009037.1	AT5G10380	RING1	RING1;protein binding / ubiquitin-protein ligase/ zinc ion binding	-2.32822	5.79551	2934.54	0	0	6.5931	6.56021	6.67294	4.24772	4.29379	4.29197	2594	1902	2039	403	563	439	Bra009037	1	-	-	-	-	-	-
Bra009062	Bra009062.1	AT5G10040	-	unknown protein	-2.26461	4.94263	2065.28	0	0	5.69929	5.72728	5.68331	3.36021	3.43345	3.5406	1395	1067	1026	217	309	260	Bra009062	1	-	-	-	-	-	-
Bra009184	Bra009184.1	AT5G06320	NHL3	NHL3	-2.91521	9.32346	14594.5	0	0	10.1342	10.1855	10.1518	7.19749	7.28473	7.23714	30220	23491	22751	3126	4493	3394	Bra009184	1	-	-	-	-	-	-
Bra009221	Bra009221.1	AT5G06730	-	peroxidase,putative	2.88942	5.54139	2846.28	0	0	3.44714	3.47766	3.20726	6.23025	6.27296	6.34118	291	223	183	1598	2227	1823	Bra009221	1	-	-	-	-	-	-
Bra009294	Bra009294.1	AT5G45820	CIPK20,SnRK3.6,PKS18	CIPK20 (CBL-INTERACTING PROTEIN KINASE 20);kinase/ protein serine/threonine kinase	-4.23529	5.39411	6039.53	0	0	6.35172	6.38133	6.36258	1.97594	2.21091	2.23456	2194	1680	1644	82	131	104	Bra009294	1	-	-	-	-	-	-
Bra009302	Bra009302.1	AT5G06980	-	unknown protein	-2.9048	4.72134	2221.19	0	0	5.57201	5.52627	5.64202	2.52707	2.76132	2.74532	1277	928	997	121	193	149	Bra009302	1	-	-	-	-	-	-
Bra009393	Bra009393.1	AT5G64430	-	octicosapeptide/Phox/Bem1p (PB1) domain-containing protein	2.24675	5.94691	2914.13	0	0	4.30698	4.48811	4.31731	6.63696	6.58951	6.56752	530	451	397	2119	2774	2133	Bra009393	1	-	-	-	-	-	-
Bra009735	Bra009735.1	AT5G24120	SIGE,SIG5,ATSIG5	SIGE (SIGMA FACTOR E);DNA binding / DNA-directed RNA polymerase/ sigma factor/ transcription factor	-2.85758	4.98387	2061.18	0	0	5.85106	5.72187	5.80958	2.73457	3.07217	2.94994	1550	1063	1120	140	240	172	Bra009735	1	-	-	-	-	-	-
Bra009876	Bra009876.1	AT5G26030	FC1,FC-I,ATFC-I	FC1 (ferrochelatase 1);ferrochelatase	-2.42498	7.75791	10424.9	0	0	8.52368	8.50789	8.51487	6.0912	6.13594	6.03105	9895	7342	7314	1451	2025	1470	Bra009876	1	-	-	-	-	-	-
Bra010015	Bra010015.1	AT5G28910	-	unknown protein	2.98203	5.51149	3819.01	0	0	3.33465	3.41199	3.2305	6.26235	6.32694	6.30353	269	213	186	1634	2312	1776	Bra010015	1	-	-	-	-	-	-
Bra010055	Bra010055.1	AT5G62070	IQD23	IQD23 (IQ-domain 23);calmodulin binding	-2.7535	5.45495	3506.31	0	0	6.2588	6.32624	6.29896	3.59682	3.58708	3.44379	2057	1617	1573	256	344	243	Bra010055	1	-	-	-	-	-	-
Bra010076	Bra010076.1	AT5G62360	-	invertase/pectin methylesterase inhibitor family protein	3.47057	5.13316	3675.32	0	0	2.44374	2.61668	2.49465	5.92509	5.99083	5.96896	144	122	111	1293	1831	1408	Bra010076	1	-	-	-	-	-	-
Bra010096	Bra010096.1	AT5G62520	SRO5	SRO5 (SIMILAR TO RCD ONE 5);NAD+ ADP-ribosyltransferase	-4.01894	4.15972	2435.04	0	0	5.07949	5.11831	5.17137	1.25416	1.09242	1.12029	907	699	719	49	59	47	Bra010096	1	-	-	-	-	-	-
Bra010099	Bra010099.1	AT5G62570	-	calmodulin-binding protein	-3.18876	6.30011	6968.21	0	0	7.2117	7.15531	7.18375	4.00368	4.02845	3.9708	3984	2874	2906	340	468	351	Bra010099	1	-	-	-	-	-	-
Bra010453	Bra010453.1	AT4G25640	-	MATE efflux family protein	-2.08623	8.37737	7216.19	0	0	9.17866	9.12474	9.10562	7.04076	7.06466	7.03548	15582	11260	11016	2804	3857	2951	Bra010453	1	-	-	-	-	-	-
Bra010627	Bra010627.1	AT4G37990	ELI3-2,ELI3,ATCAD8,CAD-B2	ELI3-2 (ELICITOR-ACTIVATED GENE 3-2);aryl-alcohol dehydrogenase/ mannitol dehydrogenase	2.56079	5.47893	2865.51	0	0	3.61416	3.69202	3.69888	6.16476	6.2256	6.25485	327	259	258	1527	2155	1717	Bra010627	1	-	-	-	-	-	-
Bra010706	Bra010706.1	AT4G39090	RD19,RD19A	RD19 (RESPONSIVE TO DEHYDRATION 19);cysteine-type endopeptidase/ cysteine-type peptidase	2.22674	6.73608	5514.71	0	0	5.18353	5.16889	5.26814	7.43079	7.42119	7.43789	975	724	769	3675	4939	3901	Bra010706	1	-	-	-	-	-	-
Bra010807	Bra010807.1	AT1G29920	CAB2,AB165,LHCB1.1	CAB2 (CHLOROPHYLL A/B-BINDING PROTEIN 2);chlorophyll binding	-2.106	12.4063	780432	0	0	13.1114	13.1011	13.1072	11.0016	11.0017	10.9989	237993	177261	176478	43689	59112	46062	Bra010807	1	-	-	-	-	-	-
Bra010819	Bra010819.1	AT1G29690	CAD1	CAD1 (constitutively activated cell death 1)	-2.37133	5.8837	3887.26	0	0	6.68356	6.64768	6.64366	4.35085	4.31657	4.20776	2762	2021	1998	433	572	414	Bra010819	1	-	-	-	-	-	-
Bra010879	Bra010879.1	AT1G28380	NSL1	NSL1 (necrotic spotted lesions 1)	-2.46722	5.78331	4054.3	0	0	6.56845	6.56626	6.59599	4.17087	4.04066	4.15116	2550	1910	1933	382	472	398	Bra010879	1	-	-	-	-	-	-
Bra010917	Bra010917.1	AT1G27770	ACA1,PEA1	ACA1 (AUTO-INHIBITED CA2+-ATPASE 1);calcium channel/ calcium-transporting ATPase/ calmodulin binding	-2.23838	7.49432	7406.67	0	0	8.23105	8.1952	8.21959	6.0458	5.94039	5.97101	8078	5911	5960	1406	1768	1410	Bra010917	1	-	-	-	-	-	-
Bra011174	Bra011174.1	AT4G30210	ATR2,AR2	ATR2 (ARABIDOPSIS P450 REDUCTASE 2);NADPH-hemoprotein reductase	-2.02851	5.46046	2485.58	0	0	6.18919	6.17609	6.1515	4.12505	4.20161	4.10721	1960	1457	1420	370	528	386	Bra011174	1	-	-	-	-	-	-
Bra011180	Bra011180.1	AT1G65310	ATXTH17,XTH17	XTH17 (XYLOGLUCAN ENDOTRANSGLUCOSYLASE/HYDROLASE 17);hydrolase,acting on glycosyl bonds / hydrolase,hydrolyzing O-glycosyl compounds / xyloglucan:xyloglucosyl transferase	-2.91382	4.64993	1976.32	0	0	5.51214	5.53091	5.65066	2.71408	2.69332	2.55121	1225	931	1003	138	184	130	Bra011180	1	-	-	-	-	-	-
Bra011181	Bra011181.1	AT1G65310	ATXTH17,XTH17	XTH17 (XYLOGLUCAN ENDOTRANSGLUCOSYLASE/HYDROLASE 17);hydrolase,acting on glycosyl bonds / hydrolase,hydrolyzing O-glycosyl compounds / xyloglucan:xyloglucosyl transferase	-3.68517	5.41257	4208.12	0	0	6.29478	6.39158	6.33247	2.77469	2.71634	2.48406	2109	1692	1610	144	187	124	Bra011181	1	-	-	-	-	-	-
Bra011292	Bra011292.1	AT1G77520	-	O-methyltransferase family 2 protein	-4.00289	4.62788	3384.1	0	0	5.59661	5.54017	5.61872	1.69152	1.72754	1.38856	1299	937	981	67	93	57	Bra011292	1	-	-	-	-	-	-
Bra011316	Bra011316.1	AT4G32030	-	unknown protein	-2.10232	5.49156	1854.78	0	0	6.16622	6.28832	6.24387	4.07772	4.0973	4.22842	1929	1575	1514	358	491	420	Bra011316	1	-	-	-	-	-	-
Bra011339	Bra011339.1	AT4G32340	-	EXPRESSED IN: 22 plant structures;EXPRESSED DURING: 13 growth stages;BEST Arabidopsis thaliana protein match is: binding (TAIR:AT1G80130.1);Has 2680 Blast hits to 1282 proteins in 184 species: Archae - 2;Bacteria - 433;Metazoa - 1247;Fungi - 71;Plants - 657;Viruses - 13;Other Eukaryotes - 257 (source: NCBI BLink).	2.41081	6.26606	4742.49	0	0	4.49952	4.62772	4.63146	6.97608	6.98828	6.99284	606	497	494	2681	3658	2865	Bra011339	1	-	-	-	-	-	-
Bra011554	Bra011554.1	AT4G34710	ADC2,SPE2,ATADC2	ADC2 (ARGININE DECARBOXYLASE 2);arginine decarboxylase	-2.06236	6.31267	4001.99	0	0	7.03316	7.02245	7.03383	4.9892	4.91778	5.01719	3520	2621	2619	675	869	727	Bra011554	1	-	-	-	-	-	-
Bra011573	Bra011573.1	AT2G16660	-	nodulin family protein	2.66725	7.53954	8420.35	0	0	5.62188	5.65674	5.52313	8.26533	8.29997	8.25132	1322	1016	918	6555	9084	6857	Bra011573	1	-	-	-	-	-	-
Bra011636	Bra011636.1	AT4G35770	SEN1,ATSEN1,DIN1	SEN1 (SENESCENCE 1)	-4.0791	5.34347	5642.48	0	0	6.28381	6.30831	6.32798	2.32572	2.28465	2.12128	2093	1597	1605	105	138	96	Bra011636	1	-	-	-	-	-	-
Bra011650	Bra011650.1	AT4G35940	-	unknown protein	-2.0497	5.48441	2121.18	0	0	6.20673	6.25218	6.14336	4.15195	4.16023	4.15836	1984	1536	1412	377	513	400	Bra011650	1	-	-	-	-	-	-
Bra011656	Bra011656.1	AT4G36040	-	DNAJ heat shock N-terminal domain-containing protein (J11)	-2.22455	7.79634	8813.75	0	0	8.50962	8.53089	8.5397	6.35789	6.29479	6.26155	9799	7460	7441	1746	2261	1725	Bra011656	1	-	-	-	-	-	-
Bra011830	Bra011830.1	AT4G39800	MI-1-P SYNTHASE,MIPS1,ATMIPS1	MIPS1 (MYO-INOSITOL-1-PHOSTPATE SYNTHASE 1);inositol-3-phosphate synthase	-3.15354	5.22586	3798.56	0	0	6.09502	6.09472	6.07224	2.84233	2.90853	3.10697	1836	1377	1344	151	214	192	Bra011830	1	-	-	-	-	-	-
Bra012008	Bra012008.1	AT2G27660	-	DC1 domain-containing protein	-2.00537	6.58803	4028.72	0	0	7.27541	7.32859	7.27693	5.31247	5.23856	5.32922	4164	3241	3100	845	1086	903	Bra012008	1	-	-	-	-	-	-
Bra012058	Bra012058.1	AT5G66210	CPK28	CPK28;ATP binding / calcium ion binding / calmodulin-dependent protein kinase/ protein kinase/ protein serine/threonine kinase	-3.54359	6.51438	8842.4	0	0	7.45369	7.39977	7.43744	3.89411	3.91028	3.87795	4712	3405	3465	315	431	329	Bra012058	1	-	-	-	-	-	-
Bra012088	Bra012088.1	AT5G66650	-	unknown protein	-3.59918	6.17654	7398.72	0	0	7.07276	7.13255	7.10315	3.61351	3.48352	3.44379	3618	2829	2748	259	320	243	Bra012088	1	-	-	-	-	-	-
Bra012334	Bra012334.1	AT1G22550	-	proton-dependent oligopeptide transport (POT) family protein	3.30413	4.29175	1786.96	0	0	1.77927	1.74737	1.9767	5.18055	5.09661	5.04464	90	66	77	771	984	741	Bra012334	1	-	-	-	-	-	-
Bra012479	Bra012479.1	AT1G25400	-	unknown protein	-3.86417	5.95724	8089.02	0	0	6.90653	6.9092	6.8898	2.99449	3.08402	3.06163	3224	2423	2370	168	242	186	Bra012479	1	-	-	-	-	-	-
Bra012676	Bra012676.1	AT4G17090	CT-BMY,BAM3,BMY8	CT-BMY (CHLOROPLAST BETA-AMYLASE);beta-amylase	2.1665	8.29831	14740.6	0	0	6.80127	6.84534	6.83588	8.99565	8.98439	8.99438	2997	2318	2283	10876	14600	11478	Bra012676	1	-	-	-	-	-	-
Bra012779	Bra012779.1	AT4G15560	CLA1,DEF,CLA,DXS,DXPS2	CLA1 (CLOROPLASTOS ALTERADOS 1);1-deoxy-D-xylulose-5-phosphate synthase	-2.35091	8.29088	17417.8	0	0	9.04612	9.05694	9.04928	6.70213	6.73189	6.65979	14214	10743	10594	2217	3062	2274	Bra012779	1	-	-	-	-	-	-
Bra012784	Bra012784.1	AT4G15480	UGT84A1	UGT84A1;UDP-glycosyltransferase/ sinapate 1-glucosyltransferase/ transferase,transferring glycosyl groups	-5.60002	5.07829	5030.36	0	0	6.12531	6.0349	6.12281	0.828014	0.378371	0.549024	1875	1321	1392	36	35	31	Bra012784	1	-	-	-	-	-	-
Bra013009	Bra013009.1	AT5G23010	MAM1,IMS3	MAM1 (METHYLTHIOALKYLMALATE SYNTHASE 1);2-isopropylmalate synthase/ methylthioalkylmalate synthase	2.68023	5.44442	3407.8	0	0	3.58763	3.43201	3.53431	6.21757	6.17455	6.2088	321	216	230	1584	2080	1663	Bra013009	1	-	-	Glucosinolate genes	-	-	-
Bra013019	Bra013019.1	AT5G23130	-	peptidoglycan-binding LysM domain-containing protein	-4.02653	4.08069	2327.81	0	0	5.05871	4.99815	5.05901	0.902338	1.16116	1.09051	894	643	665	38	62	46	Bra013019	1	-	-	-	-	-	-
Bra013026	Bra013026.1	AT5G23240	-	DNAJ heat shock N-terminal domain-containing protein	5.24845	7.33057	20453.8	0	0	3.14149	3.01195	2.86512	8.2494	8.2558	8.27137	235	161	144	6483	8810	6953	Bra013026	1	-	-	-	-	-	-
Bra013059	Bra013059.1	AT2G16660	-	nodulin family protein	4.05657	4.80314	2767.34	0	0	1.71536	1.65956	1.69417	5.61422	5.76653	5.72543	86	62	63	1042	1567	1189	Bra013059	1	-	-	-	-	-	-
Bra013123	Bra013123.1	AT2G14580	ATPRB1	ATPRB1	3.41072	9.36943	28812.5	0	0	6.74036	6.80241	6.82638	10.2078	10.1864	10.2021	2873	2250	2268	25200	33592	26514	Bra013123	1	-	-	-	-	-	-
Bra013183	Bra013183.1	AT2G05100	LHCB2.1,LHCB2	LHCB2.1;chlorophyll binding	-2.96749	10.9706	26158.6	0	0	11.7158	11.7266	11.7163	8.76798	8.70091	8.76919	90456	68364	67293	9288	11995	9819	Bra013183	1	-	-	-	-	-	-
Bra013426	Bra013426.1	AT4G19810	-	glycosyl hydrolase family 18 protein	3.36947	5.57123	4498.95	0	0	3.06021	2.89184	3.15153	6.43816	6.37777	6.38017	222	148	176	1846	2395	1873	Bra013426	1	-	-	-	-	-	-
Bra013476	Bra013476.1	AT4G20830	-	FAD-binding domain-containing protein	-3.07571	9.21854	15456.2	0	0	9.99439	10.0387	10.0086	6.86838	6.9406	6.98274	27429	21218	20601	2488	3539	2845	Bra013476	1	-	-	-	-	-	-
Bra013566	Bra013566.1	AT4G21870	-	26.5 kDa class P-related heat shock protein (HSP26.5-P)	2.65703	4.86151	2206.91	0	0	2.91839	2.88217	3.10198	5.61145	5.64079	5.56815	201	147	170	1040	1436	1066	Bra013566	1	-	-	-	-	-	-
Bra013579	Bra013579.1	AT4G04610	APR1,APR,PRH19,ATAPR1	APR1 (APS REDUCTASE 1);adenylyl-sulfate reductase	-2.72495	6.8568	7463.27	0	0	7.65555	7.70716	7.69375	4.95904	5.0014	4.91468	5420	4214	4139	661	921	677	Bra013579	1	-	-	-	-	-	-
Bra013630	Bra013630.1	AT4G22620	-	auxin-responsive family protein	-4.3888	3.96319	2300.32	0	0	4.89527	4.99367	4.95355	0.666788	0.657508	0.549024	798	641	618	32	43	31	Bra013630	1	-	Auxin genes	-	-	-	-
Bra013660	Bra013660.1	AT4G23200	-	protein kinase family protein	-2.22393	5.09004	1739.95	0	0	5.79709	5.90964	5.90536	3.65172	3.62813	3.68713	1493	1211	1197	266	354	288	Bra013660	1	-	-	-	-	-	-
Bra013678	Bra013678.1	AT4G23180	CRK10,RLK4	CRK10 (CYSTEINE-RICH RLK10);ATP binding / kinase/ protein kinase/ protein serine/threonine kinase/ protein tyrosine kinase	-2.24602	7.69612	7733.97	0	0	8.45486	8.40995	8.45631	6.24817	6.17939	6.1657	9434	6860	7023	1618	2087	1614	Bra013678	1	-	-	-	-	-	-
Bra013714	Bra013714.1	AT4G23600	CORI3,JR2	CORI3 (CORONATINE INDUCED 1);cystathionine beta-lyase/ transaminase	2.77657	6.01364	5059.95	0	0	4.02995	3.93581	4.06057	6.75887	6.79454	6.78828	437	307	332	2306	3198	2486	Bra013714	1	-	-	-	-	-	-
Bra013794	Bra013794.1	AT4G24350	-	phosphorylase family protein	-2.09748	5.15061	2116.15	0	0	5.86677	5.88807	5.88475	3.85722	3.80323	3.69704	1567	1193	1180	307	400	290	Bra013794	1	-	-	-	-	-	-
Bra013815	Bra013815.1	AT4G24570	DIC2	mitochondrial substrate carrier family protein	-2.98048	6.01513	5780.72	0	0	6.85509	6.85834	6.88126	3.94774	3.78519	3.95436	3111	2339	2356	327	395	347	Bra013815	1	-	-	-	-	-	-
Bra013985	Bra013985.1	AT5G17350	-	unknown protein	-2.42876	6.23616	4984.69	0	0	7.0233	7.00307	7.03658	4.6709	4.57563	4.54903	3496	2586	2624	541	685	525	Bra013985	1	-	-	-	-	-	-
Bra014247	Bra014247.1	AT4G14365	-	zinc finger (C3HC4-type RING finger) family protein / ankyrin repeat family protein	-2.12924	4.70447	1591.89	0	0	5.44723	5.47574	5.39184	3.37334	3.32777	3.25529	1171	896	838	219	287	213	Bra014247	1	-	-	-	-	-	-
Bra014396	Bra014396.1	AT3G62720	ATXT1,XT1,XXT1	XT1 (XYLOSYLTRANSFERASE 1);UDP-xylosyltransferase/ transferase/ transferase,transferring glycosyl groups / xyloglucan 6-xylosyltransferase	-3.50686	5.53632	5444.92	0	0	6.44334	6.48556	6.44106	2.93377	3.01141	2.92484	2338	1806	1736	161	230	169	Bra014396	1	-	-	-	-	-	-
Bra014427	Bra014427.1	AT3G61640	AGP20,AtAGP20	AGP20	-2.95476	6.07709	3693.1	0	0	7.1743	7.0252	7.03877	4.03293	4.18795	4.09976	3882	2626	2628	347	523	384	Bra014427	1	-	-	-	-	-	-
Bra014550	Bra014550.1	AT3G59010	-	pectinesterase family protein	2.59889	6.19539	5183.41	0	0	4.37578	4.35116	4.30641	6.95932	6.93856	6.92958	556	410	394	2650	3534	2742	Bra014550	1	-	-	-	-	-	-
Bra014598	Bra014598.1	AT3G57930	-	unknown protein	-3.24285	5.39353	4563.38	0	0	6.31244	6.2819	6.26372	3.10878	3.01141	3.06928	2135	1568	1535	182	230	187	Bra014598	1	-	-	-	-	-	-
Bra014636	Bra014636.1	AT3G57260	BGL2,PR2,BG2,PR-2	BGL2 (BETA-1%2C3-GLUCANASE 2);cellulase/ glucan 1%2C3-beta-glucosidase/ hydrolase,hydrolyzing O-glycosyl compounds	2.60404	6.2743	4537.32	0	0	4.43154	4.40616	4.48453	6.9868	7.04925	7.07262	578	426	446	2701	3816	3028	Bra014636	1	-	-	-	-	-	-
Bra014665	Bra014665.1	AT3G56880	-	VQ motif-containing protein	-2.20208	5.36264	1733.53	0	0	6.09972	6.10515	5.99631	4.04528	3.86977	3.76933	1842	1387	1275	350	419	305	Bra014665	1	-	-	-	-	-	-
Bra014671	Bra014671.1	AT2G27030	CAM5	CAM5 (CALMODULIN 5);calcium ion binding	-2.08905	9.19149	48619.6	0	0	9.90176	9.88656	9.90553	7.77663	7.82851	7.81814	25723	19094	19180	4671	6551	5078	Bra014671	1	-	-	-	-	-	-
Bra014674	Bra014674.1	AT3G56710	SIB1	SIB1 (SIGMA FACTOR BINDING PROTEIN 1);binding / protein binding	-2.22396	5.33815	1987.36	0	0	5.97649	5.95876	5.98837	3.7405	3.93011	3.62094	1691	1253	1268	283	437	275	Bra014674	1	-	-	-	-	-	-
Bra014838	Bra014838.1	AT3G54140	ATPTR1,PTR1	PTR1 (PEPTIDE TRANSPORTER 1);dipeptide transporter/ transporter/ tripeptide transporter	2.04438	5.84952	3107.27	0	0	4.50189	4.45914	4.42533	6.49331	6.50718	6.51943	607	442	428	1918	2620	2063	Bra014838	1	-	-	-	-	-	-
Bra014848	Bra014848.1	AT3G54020	-	phosphatidic acid phosphatase-related / PAP2-related	-2.31659	5.66955	3049.18	0	0	6.38997	6.40852	6.37307	4.08172	4.15462	3.92933	2253	1712	1656	359	511	341	Bra014848	1	-	-	-	-	-	-
Bra014977	Bra014977.1	AT3G23750	-	leucine-rich repeat family protein / protein kinase family protein	-2.26859	5.57311	2641.98	0	0	6.33654	6.37445	6.28423	4.10158	3.99117	4.13301	2171	1672	1557	364	456	393	Bra014977	1	-	-	-	-	-	-
Bra015025	Bra015025.1	AT3G23920	BAM1,BMY7,TR-BAMY	BAM1 (BETA-AMYLASE 1);beta-amylase	-2.36115	7.61937	8674.72	0	0	8.36563	8.40025	8.38236	6.0262	5.97262	6.07829	8868	6814	6672	1387	1808	1519	Bra015025	1	-	-	-	-	-	-
Bra015053	Bra015053.1	AT3G24550	ATPERK1	ATPERK1 (PROLINE EXTENSIN-LIKE RECEPTOR KINASE 1);ATP binding / protein kinase	-2.49969	8.26282	10265.6	0	0	8.92166	8.93848	8.93322	6.49481	6.43325	6.3396	13039	9896	9775	1920	2489	1821	Bra015053	1	-	-	-	-	-	-
Bra015133	Bra015133.1	AT2G04100	-	MATE efflux family protein	3.20705	4.19153	1815.35	0	0	1.77927	1.76852	1.92064	4.98064	4.9967	5.01323	90	67	74	671	918	725	Bra015133	1	-	-	-	-	-	-
Bra015346	Bra015346.1	AT1G04770	-	male sterility MS5 family protein	-2.78171	5.55481	3985.32	0	0	6.37453	6.43107	6.3852	3.55711	3.64423	3.65187	2229	1739	1670	249	358	281	Bra015346	1	-	-	-	-	-	-
Bra015531	Bra015531.1	AT1G06800	-	lipase class 3 family protein	-2.10828	5.40286	2031.63	0	0	6.10441	6.20255	6.12177	3.94774	4.08851	4.05419	1848	1484	1391	327	488	372	Bra015531	1	-	-	-	-	-	-
Bra015570	Bra015570.1	AT1G07280	-	binding	2.11445	7.58411	5491.18	0	0	6.15271	6.08633	6.01316	8.19868	8.18895	8.23248	1911	1369	1290	6259	8411	6768	Bra015570	1	-	-	-	-	-	-
Bra015727	Bra015727.1	AT1G76650	CML38	calcium-binding EF hand family protein	-2.84852	6.41815	5669.6	0	0	7.24391	7.32145	7.31367	4.39335	4.4667	4.4789	4074	3225	3180	446	635	500	Bra015727	1	-	-	-	-	-	-
Bra015873	Bra015873.1	AT3G57260	BGL2,PR2,BG2,PR-2	BGL2 (BETA-1%2C3-GLUCANASE 2);cellulase/ glucan 1%2C3-beta-glucosidase/ hydrolase,hydrolyzing O-glycosyl compounds	-5.91641	3.1995	1638.08	0	0	4.21465	4.22682	4.23542	-1.64151	-1.32896	-1.18018	497	376	375	5	9	8	Bra015873	1	-	-	-	-	-	-
Bra015908	Bra015908.1	AT1G74470	-	geranylgeranyl reductase	-2.20061	9.22089	39689.4	0	0	9.93852	9.96299	9.94368	7.75108	7.74723	7.74564	26387	20133	19694	4589	6192	4829	Bra015908	1	-	-	-	-	-	-
Bra015915	Bra015915.1	AT1G74380	XXT5	XXT5 (XYLOGLUCAN XYLOSYLTRANSFERASE 5);transferase/ transferase,transferring glycosyl groups / xyloglucan 6-xylosyltransferase	-2.4946	6.43401	5732.9	0	0	7.24355	7.21814	7.22098	4.74346	4.71362	4.76242	4073	3002	2982	569	754	609	Bra015915	1	-	-	-	-	-	-
Bra015922	Bra015922.1	AT1G74310	ATHSP101,HSP101,HOT1	ATHSP101 (ARABIDOPSIS THALIANA HEAT SHOCK PROTEIN 101);ATP binding / ATPase/ nucleoside-triphosphatase/ nucleotide binding / protein binding	-4.3701	5.07751	4983.71	0	0	6.05605	6.04685	6.06364	1.58271	1.8575	1.65594	1787	1332	1336	62	102	69	Bra015922	1	-	-	-	-	-	-
Bra015986	Bra015986.1	AT1G73540	atnudt21	atnudt21 (Arabidopsis thaliana Nudix hydrolase homolog 21);hydrolase	-3.73198	6.5182	8835.86	0	0	7.41712	7.47887	7.46342	3.81935	3.71833	3.64676	4594	3597	3528	299	377	280	Bra015986	1	-	-	-	-	-	-
Bra016060	Bra016060.1	AT1G72416	-	heat shock protein binding	2.19093	5.47038	2012.24	0	0	3.76778	4.01314	3.94355	6.07019	6.13522	6.08397	364	324	306	1430	2024	1525	Bra016060	1	-	-	-	-	-	-
Bra016126	Bra016126.1	AT1G71697	ATCK1,CK	ATCK1 (CHOLINE KINASE 1);choline kinase	-2.4387	6.17992	4447.3	0	0	6.92871	6.90801	6.94587	4.36735	4.50687	4.55994	3274	2421	2464	438	653	529	Bra016126	1	-	-	-	-	-	-
Bra016191	Bra016191.1	AT1G70740	-	protein kinase family protein	-3.81055	6.07645	8054.95	0	0	7.03193	7.0197	6.9959	3.21466	3.29245	3.12177	3517	2616	2551	196	280	194	Bra016191	1	-	-	-	-	-	-
Bra016216	Bra016216.1	AT1G70480	-	unknown protein	-2.03728	5.14674	1615.83	0	0	5.81053	5.87228	5.91734	3.86188	3.74843	3.90387	1507	1180	1207	308	385	335	Bra016216	1	-	-	-	-	-	-
Bra016233	Bra016233.1	AT1G70140	ATFH8	ATFH8 (formin 8);actin binding / actin filament binding / profilin binding	-4.31699	4.97681	4424.99	0	0	5.92002	5.9906	5.95504	1.69152	1.55094	1.79172	1626	1281	1239	67	82	76	Bra016233	1	-	-	-	-	-	-
Bra016237	Bra016237.1	AT1G70090	GATL9,LGT8	LGT8 (GLUCOSYL TRANSFERASE FAMILY 8);polygalacturonate 4-alpha-galacturonosyltransferase/ transferase,transferring glycosyl groups / transferase,transferring hexosyl groups	-2.39376	7.05068	5488.04	0	0	7.74053	7.79801	7.75146	5.48413	5.32848	5.3545	5749	4488	4308	952	1156	919	Bra016237	1	-	-	-	-	-	-
Bra016250	Bra016250.1	AT1G69930	ATGSTU11	ATGSTU11 (GLUTATHIONE S-TRANSFERASE TAU 11);glutathione transferase	-2.69286	7.83858	12529	0	0	8.67506	8.64497	8.63785	5.95159	5.96062	5.97509	10990	8074	7965	1317	1793	1414	Bra016250	1	-	-	-	-	-	-
Bra016252	Bra016252.1	AT1G69920	ATGSTU12	ATGSTU12 (GLUTATHIONE S-TRANSFERASE TAU 12);glutathione transferase	-2.08515	7.05913	4983.72	0	0	7.79493	7.7373	7.79726	5.70786	5.73023	5.63546	5970	4303	4447	1112	1528	1117	Bra016252	1	-	-	-	-	-	-
Bra016254	Bra016254.1	AT1G69900	-	FUNCTIONS IN: molecular_function unknown;INVOLVED IN: biological_process unknown;LOCATED IN: cellular_component unknown;CONTAINS InterPro DOMAIN/s: Protein of unknown function DUF569 (InterPro:IPR007679),Actin_cross-linking (InterPro:IPR008999);BEST Arabidopsis thaliana protein match is: unknown protein (TAIR:AT1G27100.1);Has 142 Blast hits to 77 proteins in 8 species: Archae - 0;Bacteria - 0;Met…	-4.13237	5.20069	4264.04	0	0	6.17442	6.25967	6.14947	2.16895	2.08683	1.99833	1940	1544	1418	94	120	88	Bra016254	1	-	-	-	-	-	-
Bra016495	Bra016495.1	AT1G19770	ATPUP14	ATPUP14;purine transmembrane transporter	-3.8349	8.40445	21291.6	0	0	9.25185	9.24959	9.22639	5.40964	5.46389	5.29534	16393	12278	11978	904	1270	882	Bra016495	1	-	-	-	-	-	-
Bra016561	Bra016561.1	AT1G18300	atnudt4	atnudt4 (Arabidopsis thaliana Nudix hydrolase homolog 4);hydrolase	-2.9922	7.51643	10807.5	0	0	8.34185	8.35379	8.39141	5.40645	5.40015	5.29697	8723	6598	6714	902	1215	883	Bra016561	1	-	-	-	-	-	-
Bra016593	Bra016593.1	AT1G17620	-	FUNCTIONS IN: molecular_function unknown;INVOLVED IN: biological_process unknown;LOCATED IN: plasma membrane;EXPRESSED IN: 23 plant structures;EXPRESSED DURING: 13 growth stages;CONTAINS InterPro DOMAIN/s: Harpin-induced 1 (InterPro:IPR010847);BEST Arabidopsis thaliana protein match is: unknown protein (TAIR:AT5G11890.1);Has 539 Blast hits to 538 proteins in 22 species: Archae - 0;Bacteria - 0;Me…	-3.12868	5.94411	5587.8	0	0	6.84673	6.83284	6.78969	3.68894	3.78882	3.60523	3093	2298	2211	273	396	272	Bra016593	1	-	-	-	-	-	-
Bra016683	Bra016683.1	AT1G14700	PAP3,ATPAP3	PAP3 (PURPLE ACID PHOSPHATASE 3);acid phosphatase/ protein serine/threonine phosphatase	-2.12744	6.32769	3125.76	0	0	7.06516	7.10892	7.18276	4.96339	4.95375	5.04075	3599	2783	2904	663	891	739	Bra016683	1	-	-	-	-	-	-
Bra016746	Bra016746.1	AT1G12990	-	glycosyl transferase family 17 protein	-2.03459	5.41457	1829.34	0	0	6.01764	6.03817	6.04737	3.97383	4.18245	3.91241	1740	1324	1321	333	521	337	Bra016746	1	-	-	-	-	-	-
Bra016789	Bra016789.1	AT1G12110	NRT1.1,CHL1-1,NRT1,B-1,ATNRT1,CHL1	NRT1.1;nitrate transmembrane transporter/ transporter	2.10183	5.03804	1845.38	0	0	3.58763	3.61823	3.6248	5.69354	5.69202	5.72421	321	246	245	1101	1488	1188	Bra016789	1	-	-	-	-	-	-
Bra016860	Bra016860.1	AT2G42760	-	unknown protein	-2.09153	6.00845	3328.37	0	0	6.70429	6.70707	6.70025	4.72054	4.54381	4.62372	2802	2106	2078	560	670	553	Bra016860	1	-	-	-	-	-	-
Bra017005	Bra017005.1	AT2G40420	-	amino acid transporter family protein	2.24061	5.08562	2101.2	0	0	3.52842	3.47766	3.61894	5.76873	5.75546	5.80209	308	223	244	1160	1555	1254	Bra017005	1	-	-	-	-	-	-
Bra017040	Bra017040.1	AT2G40000	HSPRO2,ATHSPRO2	HSPRO2 (ARABIDOPSIS ORTHOLOG OF SUGAR BEET HS1 PRO-1 2)	-3.51281	8.33701	22271.9	0	0	9.22951	9.25592	9.22831	5.69092	5.7103	5.7801	16141	12332	11994	1099	1507	1235	Bra017040	1	-	-	-	-	-	-
Bra017085	Bra017085.1	AT2G39210	-	nodulin family protein	2.08036	5.56548	2131.15	0	0	4.17064	4.11982	4.16076	6.23115	6.26907	6.17371	482	349	356	1599	2221	1623	Bra017085	1	-	-	-	-	-	-
Bra017093	Bra017093.1	AT2G38940	ATPT2,PHT1%3B4	ATPT2 (ARABIDOPSIS THALIANA PHOSPHATE TRANSPORTER 2);carbohydrate transmembrane transporter/ inorganic phosphate transmembrane transporter/ phosphate transmembrane transporter/ sugar:hydrogen symporter	3.13672	4.39353	1951.66	0	0	2.0622	2.21607	1.95825	5.22648	5.21585	5.13131	110	92	76	796	1069	787	Bra017093	1	-	-	-	-	-	-
Bra017148	Bra017148.1	AT2G37940	-	FUNCTIONS IN: molecular_function unknown;INVOLVED IN: biological_process unknown;EXPRESSED IN: 22 plant structures;EXPRESSED DURING: 13 growth stages;BEST Arabidopsis thaliana protein match is: phosphatidic acid phosphatase-related / PAP2-related (TAIR:AT3G54020.1);Has 316 Blast hits to 316 proteins in 75 species: Archae - 0;Bacteria - 0;Metazoa - 213;Fungi - 0;Plants - 48;Viruses - 0;Other Eukar…	-2.62944	7.5565	7728.54	0	0	8.29086	8.26545	8.24953	5.63888	5.59183	5.77074	8420	6206	6085	1060	1388	1227	Bra017148	1	-	-	-	-	-	-
Bra017278	Bra017278.1	AT2G35930	PUB23	PUB23 (PLANT U-BOX 23);ubiquitin-protein ligase	-2.75242	5.7674	4836.96	0	0	6.61133	6.58872	6.60713	3.77058	3.88679	3.89958	2627	1940	1948	289	424	334	Bra017278	1	-	-	-	-	-	-
Bra017301	Bra017301.1	AT2G35710	-	glycogenin glucosyltransferase (glycogenin)-related	-4.19881	5.60275	5824.46	0	0	6.47746	6.45735	6.49084	2.22795	2.52964	2.15044	2394	1771	1797	98	164	98	Bra017301	1	-	-	-	-	-	-
Bra017342	Bra017342.1	AT1G67020	-	FUNCTIONS IN: molecular_function unknown;INVOLVED IN: biological_process unknown;LOCATED IN: cellular_component unknown;EXPRESSED IN: leaf;CONTAINS InterPro DOMAIN/s: Retrotransposon gag protein (InterPro:IPR005162);Has 53 Blast hits to 53 proteins in 6 species: Archae - 0;Bacteria - 0;Metazoa - 0;Fungi - 0;Plants - 53;Viruses - 0;Other Eukaryotes - 0 (source: NCBI BLink).	-3.63566	4.83414	2966.32	0	0	5.81721	5.76196	5.70145	2.07567	2.14455	2.23456	1514	1093	1039	88	125	104	Bra017342	1	-	-	-	-	-	-
Bra017390	Bra017390.1	AT2G03280	-	unknown protein	2.66074	5.52971	3185.45	0	0	3.60537	3.74632	3.50919	6.22935	6.2916	6.29049	325	269	226	1597	2256	1760	Bra017390	1	-	-	-	-	-	-
Bra017462	Bra017462.1	AT2G01190	-	octicosapeptide/Phox/Bem1p (PB1) domain-containing protein	-2.02635	6.10707	3239.46	0	0	6.84812	6.80753	6.79034	4.77595	4.84652	4.74579	3096	2258	2212	582	827	602	Bra017462	1	-	-	-	-	-	-
Bra017464	Bra017464.1	AT2G01180	ATPAP1,PAP1,LPP1,ATLPP1	ATPAP1 (PHOSPHATIDIC ACID PHOSPHATASE 1);phosphatidate phosphatase	-3.03765	6.79903	9455.39	0	0	7.67406	7.65134	7.6688	4.63321	4.63323	4.62891	5490	4054	4068	527	713	555	Bra017464	1	-	-	-	-	-	-
Bra017524	Bra017524.1	AT5G46800	BOU	BOU (A BOUT DE SOUFFLE);binding / transporter	-2.04412	5.09764	1868.67	0	0	5.8134	5.85632	5.77443	3.79029	3.82458	3.70198	1510	1167	1093	293	406	291	Bra017524	1	-	-	-	-	-	-
Bra017628	Bra017628.1	AT4G34150	-	C2 domain-containing protein	-3.42827	6.42994	8673.37	0	0	7.3414	7.34847	7.32361	3.99522	3.8969	3.86481	4359	3286	3202	338	427	326	Bra017628	1	-	-	-	-	-	-
Bra017722	Bra017722.1	AT4G35560	-	FUNCTIONS IN: molecular_function unknown;LOCATED IN: CUL4 RING ubiquitin ligase complex;EXPRESSED IN: 20 plant structures;EXPRESSED DURING: 7 growth stages;CONTAINS InterPro DOMAIN/s: WD40 repeat-like (InterPro:IPR011046),WD40 repeat (InterPro:IPR001680),WD40/YVTN repeat-like (InterPro:IPR015943),Lethal giant larvae (Lgl) like,C-terminal (InterPro:IPR013905);BEST Arabidopsis thaliana protein matc…	-2.3628	5.65029	3263.08	0	0	6.42535	6.46142	6.39123	4.12505	4.02538	4.06954	2309	1776	1677	370	467	376	Bra017722	1	-	-	-	-	-	-
Bra017823	Bra017823.1	-	-	-	-2.0091	6.88279	4202.93	0	0	7.62544	7.64135	7.56062	5.55353	5.62466	5.63288	5308	4026	3774	999	1420	1115	Bra017823	1	-	-	-	-	-	-
Bra017920	Bra017920.1	AT1G21500	-	unknown protein	-2.33826	7.9442	6722.08	0	0	8.77335	8.73012	8.68804	6.35707	6.42279	6.397	11765	8565	8247	1745	2471	1895	Bra017920	1	-	-	-	-	-	-
Bra018065	Bra018065.1	AT3G48360	BT2,ATBT2	BT2 (BTB AND TAZ DOMAIN PROTEIN 2);protein binding / transcription factor/ transcription regulator	4.9916	7.18511	15029.4	0	0	3.06021	3.18706	3.15153	8.13026	8.07537	8.11463	222	182	176	5969	7774	6237	Bra018065	1	-	-	-	-	-	-
Bra018183	Bra018183.1	AT3G46930	-	protein kinase family protein	-2.62535	5.3446	3153.75	0	0	6.1406	6.09994	6.13003	3.66245	3.45185	3.46136	1895	1382	1399	268	313	246	Bra018183	1	-	-	-	-	-	-
Bra018216	Bra018216.1	AT1G53540	-	17.6 kDa class I small heat shock protein (HSP17.6C-CI) (AA 1-156)	-2.47306	5.7441	3573.96	0	0	6.50489	6.55185	6.56661	3.99096	4.08261	4.12936	2440	1891	1894	337	486	392	Bra018216	1	-	-	-	-	-	-
Bra018346	Bra018346.1	AT1G07160	-	protein phosphatase 2C,putative / PP2C,putative	-2.23985	7.74817	8992.23	0	0	8.48437	8.51729	8.47488	6.24192	6.24156	6.27816	9629	7390	7114	1611	2179	1745	Bra018346	1	-	-	-	-	-	-
Bra018383	Bra018383.1	AT2G29500	-	17.6 kDa class I small heat shock protein (HSP17.6B-CI)	-3.16391	6.36818	6904.31	0	0	7.21061	7.24761	7.25821	3.96085	4.15181	4.08473	3981	3064	3060	330	510	380	Bra018383	1	-	-	-	-	-	-
Bra018409	Bra018409.1	AT2G29110	ATGLR2.8,GLR2.8	ATGLR2.8;intracellular ligand-gated ion channel	-3.26651	4.65179	2779.38	0	0	5.55613	5.5091	5.58605	2.35248	2.34499	2.20706	1263	917	959	107	144	102	Bra018409	1	-	-	-	-	-	-
Bra018469	Bra018469.1	AT4G12290	-	amine oxidase/ copper ion binding / quinone binding	2.19653	6.73181	3837.26	0	0	5.20114	5.04872	5.21669	7.35342	7.40593	7.33843	987	666	742	3483	4887	3641	Bra018469	1	-	-	-	-	-	-
Bra018477	Bra018477.1	AT4G12400	-	stress-inducible protein,putative	-3.13477	6.99299	9127.28	0	0	7.89072	7.87862	7.83123	4.73586	4.68861	4.79741	6380	4746	4553	566	741	624	Bra018477	1	-	-	-	-	-	-
Bra018492	Bra018492.1	AT4G04540	-	protein kinase family protein	2.16803	6.04171	3469.58	0	0	4.59584	4.55352	4.51008	6.68841	6.73847	6.73332	648	472	454	2196	3076	2393	Bra018492	1	-	-	-	-	-	-
Bra018703	Bra018703.1	AT1G48090	-	phosphoinositide binding	-3.59117	5.40856	5210.8	0	0	6.35435	6.3369	6.309	2.70372	2.79054	2.77371	2198	1629	1584	137	197	152	Bra018703	1	-	-	-	-	-	-
Bra018750	Bra018750.1	AT1G23160	-	auxin-responsive GH3 family protein	2.94726	6.60926	6952.41	0	0	4.49239	4.38578	4.4813	7.36988	7.42353	7.40158	603	420	445	3523	4947	3804	Bra018750	1	-	-	-	-	-	-
Bra018907	Bra018907.1	AT1G51400	-	photosystem II 5 kD protein	-2.35787	7.32464	7569.44	0	0	8.11394	8.09205	8.06468	5.73608	5.70167	5.77543	7448	5503	5353	1134	1498	1231	Bra018907	1	-	-	-	-	-	-
Bra018964	Bra018964.1	AT1G52340	ABA2,SIS4,GIN1,SDR1,ISI4,SRE1,ATABA2,ATSDR1	ABA2 (ABA DEFICIENT 2);alcohol dehydrogenase/ oxidoreductase/ xanthoxin dehydrogenase	-2.1468	5.41083	1978.7	0	0	6.09188	6.17708	6.17366	4.10551	3.90026	4.02299	1832	1458	1442	365	428	364	Bra018964	1	-	-	-	-	-	-
Bra018987	Bra018987.1	AT1G52770	-	phototropic-responsive NPH3 family protein	3.28339	3.95048	1500.91	0	0	1.46634	1.59	1.50381	4.83407	4.75498	4.69968	72	59	55	606	776	583	Bra018987	1	-	-	-	-	-	-
Bra019002	Bra019002.1	AT3G15450	-	unknown protein	-2.55727	5.65443	4020.09	0	0	6.46658	6.44098	6.47795	3.9167	3.95935	3.84264	2376	1751	1781	320	446	321	Bra019002	1	-	-	-	-	-	-
Bra019035	Bra019035.1	AT4G27657	-	unknown protein	-3.09496	3.87692	1514.37	0	0	4.78674	4.68444	4.79109	1.62722	1.81547	1.5936	740	517	552	64	99	66	Bra019035	1	-	-	-	-	-	-
Bra019295	Bra019295.1	AT4G23570	SGT1A	SGT1A;protein binding	-2.16487	6.18372	3196.56	0	0	6.984	6.88218	6.94236	4.79558	4.80953	4.72898	3402	2378	2458	590	806	595	Bra019295	1	-	-	-	-	-	-
Bra019357	Bra019357.1	AT4G22780	ACR7	ACR7;amino acid binding	-2.85292	5.5152	3443.08	0	0	6.40777	6.31999	6.41594	3.49842	3.58708	3.52399	2281	1610	1706	239	344	257	Bra019357	1	-	-	-	-	-	-
Bra019406	Bra019406.1	AT4G04610	APR1,APR,PRH19,ATAPR1	APR1 (APS REDUCTASE 1);adenylyl-sulfate reductase	-2.6719	7.15273	9287.65	0	0	7.98479	7.96501	7.95761	5.24445	5.32474	5.32283	6810	5039	4970	806	1153	899	Bra019406	1	-	-	-	-	-	-
Bra019584	Bra019584.1	AT3G49220	-	pectinesterase family protein	-2.08743	6.28749	3752.66	0	0	6.98231	7.00808	6.98113	4.96122	4.8255	4.93786	3398	2595	2525	662	815	688	Bra019584	1	-	-	-	-	-	-
Bra019644	Bra019644.1	AT3G52840	BGAL2	BGAL2 (beta-galactosidase 2);beta-galactosidase/ catalytic/ cation binding	3.19614	6.72692	7681.48	0	0	4.38094	4.30125	4.16076	7.51796	7.47843	7.49408	558	396	356	3904	5139	4056	Bra019644	1	-	-	-	-	-	-
Bra019686	Bra019686.1	AT1G14040	-	LOCATED IN: integral to membrane;EXPRESSED IN: 21 plant structures;EXPRESSED DURING: 12 growth stages;CONTAINS InterPro DOMAIN/s: SPX,N-terminal (InterPro:IPR004331),EXS,C-terminal (InterPro:IPR004342);BEST Arabidopsis thaliana protein match is: unknown protein (TAIR:AT2G03240.1);Has 732 Blast hits to 696 proteins in 144 species: Archae - 0;Bacteria - 0;Metazoa - 238;Fungi - 246;Plants - 151;Viru…	2.88238	8.80622	21437.3	0	0	6.74337	6.73083	6.69609	9.61832	9.59221	9.61075	2879	2141	2072	16747	22251	17597	Bra019686	1	-	-	-	-	-	-
Bra019718	Bra019718.1	AT1G13560	AAPT1,ATAAPT1	AAPT1 (AMINOALCOHOLPHOSPHOTRANSFERASE 1);phosphatidyltransferase/ phosphotransferase,for other substituted phosphate groups	-2.69582	6.56146	6575.62	0	0	7.36046	7.35329	7.36139	4.56047	4.71743	4.68231	4417	3297	3287	501	756	576	Bra019718	1	-	-	-	-	-	-
Bra020011	Bra020011.1	AT1G09575	-	unknown protein	-3.56017	4.93384	3102.18	0	0	5.85477	5.85262	5.95853	2.31215	2.45859	2.22088	1554	1164	1242	104	156	103	Bra020011	1	-	-	-	-	-	-
Bra020123	Bra020123.1	AT5G20700	-	senescence-associated protein-related	2.2667	5.96703	3870.35	0	0	4.36801	4.36511	4.47807	6.66592	6.66295	6.66106	553	414	444	2162	2919	2276	Bra020123	1	-	-	-	-	-	-
Bra020140	Bra020140.1	AT5G20960	AAO1,AO1,ATAO,ATAO1	AAO1 (ARABIDOPSIS ALDEHYDE OXIDASE 1);aldehyde oxidase/ indole-3-acetaldehyde oxidase	3.61724	5.54342	4508.59	0	0	2.77685	2.66258	2.91379	6.39457	6.35043	6.42636	182	126	149	1791	2350	1934	Bra020140	1	-	-	-	-	-	-
Bra020179	Bra020179.1	AT5G22250	-	CCR4-NOT transcription complex protein,putative	-2.49641	6.1164	4057.5	0	0	6.93003	7.00974	6.92287	4.45639	4.41837	4.50454	3277	2598	2425	466	614	509	Bra020179	1	-	-	-	-	-	-
Bra020313	Bra020313.1	AT5G59550	-	zinc finger (C3HC4-type RING finger) family protein	-2.51364	6.08675	3584.87	0	0	6.88081	6.97036	6.87697	4.5049	4.35131	4.35283	3167	2528	2349	482	586	458	Bra020313	1	-	-	-	-	-	-
Bra020433	Bra020433.1	AT4G30270	MERI5B,MERI-5,SEN4	MERI5B (meristem-5);hydrolase,acting on glycosyl bonds / xyloglucan:xyloglucosyl transferase	-2.58221	9.02951	19673.5	0	0	9.80822	9.82426	9.82971	7.27341	7.23941	7.20405	24108	18287	18198	3295	4354	3317	Bra020433	1	-	-	-	-	-	-
Bra020800	Bra020800.1	AT3G05910	-	pectinacetylesterase,putative	2.39273	6.25098	3380.27	0	0	4.54159	4.55352	4.69689	6.91063	7.0129	6.98578	624	472	517	2562	3721	2851	Bra020800	1	-	-	-	-	-	-
Bra020820	Bra020820.1	AT4G23260	-	ATP binding / protein kinase/ protein serine/threonine kinase/ protein tyrosine kinase	3.65714	4.92069	2992.21	0	0	2.20865	1.63674	2.04821	5.6698	5.70647	5.67488	122	61	81	1083	1503	1148	Bra020820	1	-	-	-	-	-	-
Bra020821	Bra020821.1	AT4G23130	CRK5,RLK6	CRK5 (CYSTEINE-RICH RLK5);kinase	2.82978	4.05705	1420.28	8.22511309964635e-311	0	2.04929	2.1041	1.88202	4.85293	4.82903	4.78817	109	85	72	614	817	620	Bra020821	1	-	-	-	-	-	-
Bra020827	Bra020827.1	AT4G23190	CRK11,AT-RLK3	CRK11 (CYSTEINE-RICH RLK11);kinase/ protein kinase	-2.64543	5.48292	3075.34	0	0	6.23336	6.20643	6.25713	3.68894	3.42881	3.63649	2021	1488	1528	273	308	278	Bra020827	1	-	-	-	-	-	-
Bra020862	Bra020862.1	AT4G21910	-	MATE efflux family protein	3.28904	4.16329	1624.21	0	0	1.74767	1.76852	1.22398	4.91259	4.8809	4.95449	88	67	45	640	847	696	Bra020862	1	-	-	-	-	-	-
Bra021101	Bra021101.1	AT3G16530	-	legume lectin family protein	-2.38332	7.38439	5059.79	0	0	8.15987	8.20566	8.26767	5.75876	5.83738	5.86503	7689	5954	6162	1152	1646	1310	Bra021101	1	-	-	-	-	-	-
Bra021110	Bra021110.1	AT3G15450	-	unknown protein	-4.05001	7.58519	18598.2	0	0	8.52979	8.54971	8.51191	4.47172	4.46896	4.51859	9937	7558	7299	471	636	514	Bra021110	1	-	-	-	-	-	-
Bra021175	Bra021175.1	AT3G16400	ATMLP-470,NSP1,ATNSP1	NSP1 (NITRILE SPECIFIER PROTEIN 1)	-2.34857	4.66483	1694.52	0	0	5.43612	5.39306	5.49301	2.98597	3.08991	3.22134	1162	846	899	167	243	208	Bra021175	1	-	-	-	-	-	-
Bra021208	Bra021208.1	AT3G16860	COBL8	COBL8 (COBRA-LIKE PROTEIN 8 PRECURSOR)	-2.89213	5.46006	4178.19	0	0	6.30432	6.31551	6.32888	3.43097	3.46551	3.38978	2123	1605	1606	228	316	234	Bra021208	1	-	-	-	-	-	-
Bra021259	Bra021259.1	AT3G17611	ATRBL14	ATRBL14 (ARABIDOPSIS RHOMBOID-LIKE PROTEIN 14);zinc ion binding	-2.95115	4.21065	1553.88	0	0	5.01292	5.00485	5.11004	2.10744	2.26396	1.84621	866	646	689	90	136	79	Bra021259	1	-	-	-	-	-	-
Bra021480	Bra021480.1	AT3G01060	-	unknown protein	-2.2659	5.34069	1748.63	0	0	6.14894	6.01513	6.07973	3.71495	3.93666	3.79726	1906	1303	1351	278	439	311	Bra021480	1	-	-	-	-	-	-
Bra021569	Bra021569.1	AT3G14590	NTMC2TYPE6.2,NTMC2T6.2	NTMC2T6.2;CONTAINS InterPro DOMAIN/s: C2 membrane targeting protein (InterPro:IPR018029),C2 calcium/lipid-binding region,CaLB (InterPro:IPR008973),C2 calcium-dependent membrane targeting (InterPro:IPR000008);BEST Arabidopsis thaliana protein match is: NTMC2T6.1 (TAIR:AT1G53590.1);Has 3086 Blast hits to 2715 proteins in 189 species: Archae - 0;Bacteria - 2;Metazoa - 1924;Fungi - 336;Plants - 571;V…	-2.99271	5.36938	3546.6	0	0	6.27483	6.2333	6.19054	3.25067	3.20833	3.31447	2080	1516	1459	201	264	222	Bra021569	1	-	-	-	-	-	-
Bra021614	Bra021614.1	AT5G67360	ARA12	ARA12;serine-type endopeptidase	3.29181	5.88968	5869.21	0	0	3.34525	3.45827	3.50284	6.71507	6.69373	6.72547	271	220	225	2237	2982	2380	Bra021614	1	-	-	-	-	-	-
Bra021636	Bra021636.1	AT2G30490	ATC4H,C4H,CYP73A5	C4H (CINNAMATE-4-HYDROXYLASE);trans-cinnamate 4-monooxygenase	3.09605	4.68976	2124.75	0	0	2.47302	2.43024	2.30332	5.50813	5.42831	5.53674	147	107	97	968	1239	1043	Bra021636	1	-	-	-	Anthocyanin genes	-	-
Bra021831	Bra021831.1	AT2G33170	-	leucine-rich repeat transmembrane protein kinase,putative	2.5121	5.75408	3405.03	0	0	4.00009	3.91225	4.02113	6.49631	6.51322	6.44414	428	302	323	1922	2631	1958	Bra021831	1	-	-	-	-	-	-
Bra021861	Bra021861.1	AT2G33580	-	protein kinase family protein / peptidoglycan-binding LysM domain-containing protein	-3.63477	6.02188	6917.01	0	0	6.92165	6.96979	6.92525	3.16269	3.4101	3.31447	3258	2527	2429	189	304	222	Bra021861	1	-	-	-	-	-	-
Bra021912	Bra021912.1	AT2G34460	-	flavin reductase-related	-2.18607	5.49547	2792.44	0	0	6.22119	6.24937	6.24006	4.01629	4.14334	3.97488	2004	1533	1510	343	507	352	Bra021912	1	-	-	-	-	-	-
Bra021965	Bra021965.1	AT5G45340	CYP707A3	CYP707A3;(+)-abscisic acid 8'-hydroxylase/ oxygen binding	-5.24685	6.68188	14894.2	0	0	7.6793	7.68891	7.68606	2.59587	2.44946	2.32688	5510	4161	4117	127	155	111	Bra021965	1	-	-	-	-	-	-
Bra022161	Bra022161.1	AT3G16470	JR1	JR1	2.39904	6.56758	4351.31	0	0	4.91497	4.88654	4.99486	7.29642	7.37973	7.30883	809	595	636	3348	4799	3567	Bra022161	1	-	-	-	-	-	-
Bra022191	Bra022191.1	AT3G17040	HCF107	HCF107 (HIGH CHLOROPHYLL FLUORESCENT 107);binding	-2.72452	5.36467	3059.84	0	0	6.15573	6.24748	6.20039	3.44347	3.50571	3.49016	1915	1531	1469	230	325	251	Bra022191	1	-	-	-	-	-	-
Bra022437	Bra022437.1	AT3G19595	-	phosphoprotein phosphatase	-2.17939	7.03139	5951.35	0	0	7.76466	7.74832	7.79368	5.56215	5.6428	5.55322	5846	4336	4436	1005	1438	1055	Bra022437	1	-	-	-	-	-	-
Bra022594	Bra022594.1	AT5G52450	-	MATE efflux protein-related	-2.94985	4.57033	2114.4	0	0	5.38696	5.41836	5.34647	2.50338	2.24297	2.5943	1123	861	812	119	134	134	Bra022594	1	-	-	-	-	-	-
Bra022668	Bra022668.1	AT5G53730	-	harpin-induced family protein / HIN1 family protein / harpin-responsive family protein	4.68173	4.42942	3040.56	0	0	0.784102	0.783817	0.521954	5.30564	5.32224	5.33875	44	33	27	841	1151	909	Bra022668	1	-	-	-	-	-	-
Bra022723	Bra022723.1	AT5G54490	PBP1	PBP1 (PINOID-BINDING PROTEIN 1);calcium ion binding / protein binding	-3.31626	7.46731	14278.3	0	0	8.34234	8.36076	8.37325	5.09003	5.05356	4.98921	8726	6630	6630	724	955	713	Bra022723	1	-	-	-	-	-	-
Bra022772	Bra022772.1	AT2G30020	-	protein phosphatase 2C,putative / PP2C,putative	-3.64997	7.3271	16040.1	0	0	8.26004	8.23894	8.24097	4.63048	4.60883	4.56536	8242	6093	6049	526	701	531	Bra022772	1	-	-	-	-	-	-
Bra022805	Bra022805.1	AT2G30520	RPT2	RPT2 (ROOT PHOTOTROPISM 2);protein binding	-3.00126	5.53697	4187.66	0	0	6.41344	6.43438	6.36434	3.36021	3.49244	3.35888	2290	1743	1646	217	322	229	Bra022805	1	-	-	-	-	-	-
Bra022815	Bra022815.1	AT2G30860	ATGSTF9,GLUTTR,ATGSTF7	ATGSTF9 (GLUTATHIONE S-TRANSFERASE PHI 9);copper ion binding / glutathione binding / glutathione peroxidase/ glutathione transferase	2.61992	7.82655	11991.8	0	0	5.95589	5.95876	5.99291	8.59091	8.59929	8.56739	1667	1253	1272	8215	11179	8537	Bra022815	1	-	-	Glucosinolate genes	-	-	-
Bra022905	Bra022905.1	AT2G32800	AP4.3A	AP4.3A;ATP binding / protein kinase/ protein serine/threonine kinase/ protein tyrosine kinase	-3.31252	5.79305	5620.93	0	0	6.68981	6.72746	6.66372	3.38635	3.42881	3.34633	2774	2136	2026	221	308	227	Bra022905	1	-	-	-	-	-	-
Bra022935	Bra022935.1	AT2G33360	-	unknown protein	-3.65042	4.35153	1589.05	0	0	5.19675	5.19645	5.36759	1.75306	1.20523	1.75421	984	738	824	70	64	74	Bra022935	1	-	-	-	-	-	-
Bra022976	Bra022976.1	AT2G34430	LHB1B1,LHCB1.4	LHB1B1;chlorophyll binding	-2.16424	12.3937	907844	0	0	13.1053	13.1079	13.1011	10.9495	10.9393	10.9335	236991	178094	175735	42140	56610	44020	Bra022976	1	-	-	-	-	-	-
Bra022981	Bra022981.1	AT2G34600	JAZ7,TIFY5B	JAZ7 (JASMONATE-ZIM-DOMAIN PROTEIN 7)	-5.09672	3.44907	1624.02	0	0	4.48042	4.35116	4.52269	-0.428841	-0.897551	-0.104724	598	410	458	14	13	19	Bra022981	1	-	-	-	-	-	-
Bra023006	Bra023006.1	AT2G35260	-	unknown protein	-2.38828	6.25083	4889.18	0	0	7.00879	7.04645	7.03713	4.62774	4.64927	4.65458	3461	2665	2625	525	721	565	Bra023006	1	-	-	-	-	-	-
Bra023044	Bra023044.1	AT2G35930	PUB23	PUB23 (PLANT U-BOX 23);ubiquitin-protein ligase	-2.36572	4.60486	1665.96	0	0	5.36109	5.34636	5.44911	3.01139	3.02377	3.05393	1103	819	872	170	232	185	Bra023044	1	-	-	-	-	-	-
Bra023103	Bra023103.1	AT2G37170	PIP2B,PIP2%3B2	PIP2B (PLASMA MEMBRANE INTRINSIC PROTEIN 2);water channel	-2.48648	6.06315	3815.15	0	0	6.93837	6.86265	6.85346	4.3869	4.43002	4.38693	3296	2346	2311	444	619	469	Bra023103	1	-	-	-	-	-	-
Bra023126	Bra023126.1	AT1G30730	-	FAD-binding domain-containing protein	-2.38408	4.70642	1854.03	0	0	5.48245	5.47413	5.47204	3.17023	2.9673	3.19358	1200	895	886	190	223	204	Bra023126	1	-	-	-	-	-	-
Bra023398	Bra023398.1	AT5G13200	-	GRAM domain-containing protein / ABA-responsive protein-related	-2.25029	6.47114	4728.31	0	0	7.2008	7.19587	7.21856	4.8646	4.99042	4.98921	3954	2956	2977	619	914	713	Bra023398	1	-	-	-	-	-	-
Bra023434	Bra023434.1	AT5G13770	-	pentatricopeptide (PPR) repeat-containing protein	-2.83114	5.36318	3078.9	0	0	6.19287	6.29015	6.20626	3.48639	3.39591	3.33367	1965	1577	1475	237	301	225	Bra023434	1	-	-	-	-	-	-
Bra023676	Bra023676.1	AT5G18470	-	curculin-like (mannose-binding) lectin family protein	4.1859	6.15202	8751.27	0	0	2.74519	2.93923	2.93281	7.02836	7.0287	7.04376	178	153	151	2780	3762	2968	Bra023676	1	-	-	-	-	-	-
Bra024126	Bra024126.1	AT4G29780	-	unknown protein	-4.60522	5.22617	5752.71	0	0	6.21325	6.18693	6.24292	1.71233	1.6339	1.5936	1993	1468	1513	68	87	66	Bra024126	1	-	-	-	-	-	-
Bra024318	Bra024318.1	AT5G64660	ATCMPG2,CMPG2	U-box domain-containing protein	-2.75229	6.38985	5335.19	0	0	7.25132	7.25652	7.33751	4.51973	4.56721	4.48177	4095	3083	3233	487	681	501	Bra024318	1	-	-	-	-	-	-
Bra024339	Bra024339.1	AT5G64940	ATATH13,ATH13,ATOSA1,OSA1	ATATH13;transporter	-2.04062	7.67998	7947.14	0	0	8.36806	8.38984	8.40275	6.34879	6.33129	6.36237	8883	6765	6767	1735	2319	1850	Bra024339	1	-	-	-	-	-	-
Bra024611	Bra024611.1	AT1G23710	-	unknown protein	-2.53738	7.12737	8860.66	0	0	7.91582	7.91966	7.94098	5.40486	5.35317	5.42034	6492	4883	4913	901	1176	962	Bra024611	1	-	-	-	-	-	-
Bra024662	Bra024662.1	AT1G27100	-	FUNCTIONS IN: molecular_function unknown;INVOLVED IN: biological_process unknown;LOCATED IN: vacuole;EXPRESSED IN: 23 plant structures;EXPRESSED DURING: 13 growth stages;CONTAINS InterPro DOMAIN/s: Protein of unknown function DUF569 (InterPro:IPR007679),Actin_cross-linking (InterPro:IPR008999);BEST Arabidopsis thaliana protein match is: unknown protein (TAIR:AT1G69900.1);Has 184 Blast hits to 118…	-4.03347	8.06939	28858.9	0	0	9.00557	9.01429	9.0091	4.91259	5.00763	5.00527	13820	10430	10303	640	925	721	Bra024662	1	-	-	-	-	-	-
Bra024717	Bra024717.1	AT1G26420	-	FAD-binding domain-containing protein	3.56011	4.85003	2597.91	0	0	2.08766	2.30559	2.14923	5.6551	5.69686	5.7894	112	98	87	1072	1493	1243	Bra024717	1	-	-	-	-	-	-
Bra024851	Bra024851.1	AT2G01170	BAT1	BAT1 (BIDIRECTIONAL AMINO ACID TRANSPORTER 1);amino acid transmembrane transporter	-3.48351	5.84743	5493.68	0	0	6.72167	6.7876	6.72978	3.19262	3.39591	3.19358	2836	2227	2121	193	301	204	Bra024851	1	-	-	-	-	-	-
Bra024879	Bra024879.1	AT2G01520	MLP328	MLP328 (MLP-LIKE PROTEIN 328);copper ion binding	-2.1778	6.89028	5898.59	0	0	7.63626	7.60508	7.64052	5.41441	5.47406	5.46019	5348	3926	3989	907	1279	989	Bra024879	1	-	-	-	-	-	-
Bra025207	Bra025207.1	AT3G26440	-	unknown protein	-2.32867	4.73259	1573.68	0	0	5.55613	5.43994	5.501	3.20735	3.26148	3.06163	1263	874	904	195	274	186	Bra025207	1	-	-	-	-	-	-
Bra025280	Bra025280.1	AT4G27710	CYP709B3	CYP709B3;electron carrier/ heme binding / iron ion binding / monooxygenase/ oxygen binding	-2.44465	5.18206	2732.78	0	0	5.99006	5.98722	5.93632	3.59682	3.52323	3.49585	1707	1278	1223	256	329	252	Bra025280	1	-	-	-	-	-	-
Bra025297	Bra025297.1	AT3G27690	LHCB2.4,LHCB2.3,LHCB2	LHCB2.3;chlorophyll binding	-5.0703	10.3002	800658	0	0	11.2591	11.2644	11.2787	6.18909	6.23094	6.16659	65910	49623	49688	1553	2163	1615	Bra025297	1	-	-	-	-	-	-
Bra025325	Bra025325.1	AT3G28340	GATL10	GATL10 (Galacturonosyltransferase-like 10);polygalacturonate 4-alpha-galacturonosyltransferase/ transferase,transferring hexosyl groups	-3.99702	5.92842	7771.12	0	0	6.89305	6.89485	6.85533	3.00296	2.90185	2.79233	3194	2399	2314	169	213	154	Bra025325	1	-	-	-	-	-	-
Bra025371	Bra025371.1	AT3G29010	-	catalytic	-2.077	6.11012	3273.48	0	0	6.79742	6.8037	6.85033	4.80045	4.76237	4.64693	2989	2252	2306	592	780	562	Bra025371	1	-	-	-	-	-	-
Bra025400	Bra025400.1	AT3G29575	AFP3	AFP3 (ABI FIVE BINDING PROTEIN 3)	-2.50962	4.77556	1564.59	0	0	5.53893	5.70277	5.66637	3.18519	3.15876	3.08447	1248	1049	1014	192	255	189	Bra025400	1	-	-	-	-	-	-
Bra025409	Bra025409.1	AT3G30180	CYP85A2,BR6OX2	BR6OX2 (BRASSINOSTEROID-6-OXIDASE 2);monooxygenase/ oxygen binding	3.06447	4.17091	1597.7	0	0	1.95559	1.78936	2.0129	4.97635	5.00452	4.89542	102	68	79	669	923	668	Bra025409	1	-	-	-	-	-	-
Bra025439	Bra025439.1	AT5G37770	TCH2,CML24	TCH2 (TOUCH 2);calcium ion binding	-2.82935	8.31103	14080.2	0	0	9.09785	9.12358	9.13247	6.34962	6.24881	6.28639	14733	11251	11223	1736	2190	1755	Bra025439	1	-	-	-	-	-	-
Bra025450	Bra025450.1	AT5G42050	-	FUNCTIONS IN: molecular_function unknown;EXPRESSED IN: 22 plant structures;EXPRESSED DURING: 13 growth stages;CONTAINS InterPro DOMAIN/s: Development and cell death domain (InterPro:IPR013989),Kelch related (InterPro:IPR013089);BEST Arabidopsis thaliana protein match is: unknown protein (TAIR:AT3G27090.1);Has 5084 Blast hits to 2870 proteins in 85 species: Archae - 0;Bacteria - 24;Metazoa - 270;F…	-2.06406	8.0073	9274.64	0	0	8.72891	8.69449	8.72243	6.66191	6.66394	6.63033	11408	8356	8446	2156	2921	2228	Bra025450	1	-	-	-	-	-	-
Bra025547	Bra025547.1	AT5G40780	LHT1	LHT1;amino acid transmembrane transporter	3.49732	6.65502	8379.25	0	0	4.03651	4.00425	3.9668	7.50721	7.52047	7.45881	439	322	311	3875	5291	3958	Bra025547	1	-	-	-	-	-	-
Bra025664	Bra025664.1	AT5G39530	-	unknown protein	-2.22965	5.41064	2787.06	0	0	6.17887	6.16118	6.14642	3.89411	3.98486	3.92512	1946	1442	1415	315	454	340	Bra025664	1	-	-	-	-	-	-
Bra025683	Bra025683.1	AT1G18740	-	unknown protein	-2.79048	7.69008	10764.3	0	0	8.50785	8.55257	8.5004	5.68961	5.75639	5.73989	9787	7573	7241	1098	1556	1201	Bra025683	1	-	-	-	-	-	-
Bra025728	Bra025728.1	AT1G19320	-	pathogenesis-related thaumatin family protein	4.86955	8.97412	31483	0	0	5.01292	5.0659	5.05251	9.93443	9.89354	9.89475	866	674	662	20850	27420	21426	Bra025728	1	-	-	-	-	-	-
Bra025730	Bra025730.1	AT1G19320	-	pathogenesis-related thaumatin family protein	4.74883	4.97881	4226.59	0	0	1.16518	1.21195	1.16086	5.82713	5.88304	5.91475	58	45	43	1208	1699	1356	Bra025730	1	-	-	-	-	-	-
Bra025736	Bra025736.1	AT1G19390	-	wall-associated kinase,putative	-3.58086	4.37581	2543.62	0	0	5.31467	5.29446	5.29962	1.73284	1.82961	1.67614	1068	790	786	69	100	70	Bra025736	1	-	-	-	-	-	-
Bra025756	Bra025756.1	AT1G19670	ATCLH1,CORI1,ATHCOR1	ATCLH1 (ARABIDOPSIS THALIANA CORONATINE-INDUCED PROTEIN 1);chlorophyllase	3.4091	5.22264	3209.99	0	0	2.80782	2.4695	2.41574	5.92843	5.95256	5.93689	186	110	105	1296	1783	1377	Bra025756	1	-	-	-	-	-	-
Bra025832	Bra025832.1	AT1G20620	CAT3,SEN2,ATCAT3	CAT3 (CATALASE 3);catalase	2.10451	5.53393	2193.08	0	0	4.14054	4.05246	4.09896	6.25439	6.1904	6.16123	472	333	341	1625	2103	1609	Bra025832	1	-	-	-	-	-	-
Bra025917	Bra025917.1	AT1G18300	atnudt4	atnudt4 (Arabidopsis thaliana Nudix hydrolase homolog 4);hydrolase	-3.29782	6.03852	6415.4	0	0	6.90921	6.95949	6.94763	3.57994	3.6362	3.72154	3230	2509	2467	253	356	295	Bra025917	1	-	-	-	-	-	-
Bra025924	Bra025924.1	AT1G18210	-	calcium-binding protein,putative	-2.35744	7.43071	5077.62	0	0	8.08578	8.13822	8.15349	5.8867	5.76929	5.70345	7304	5682	5693	1259	1570	1171	Bra025924	1	-	-	-	-	-	-
Bra025951	Bra025951.1	AT1G17750	-	leucine-rich repeat transmembrane protein kinase,putative	-3.90362	5.69458	5327.19	0	0	6.69033	6.59983	6.62551	2.71408	2.70871	2.8468	2775	1955	1973	138	186	160	Bra025951	1	-	-	-	-	-	-
Bra026084	Bra026084.1	AT1G16030	Hsp70b	Hsp70b (heat shock protein 70B);ATP binding	-3.0157	5.09407	3206.74	0	0	5.9909	5.97931	5.91615	3.02808	2.89514	2.98274	1708	1271	1206	172	212	176	Bra026084	1	-	-	-	-	-	-
Bra026099	Bra026099.1	AT1G15820	LHCB6,CP24	LHCB6 (LIGHT HARVESTING COMPLEX PSII SUBUNIT 6);chlorophyll binding	-2.02632	10.6243	15433	0	0	11.3174	11.3306	11.2894	9.27368	9.30025	9.28387	68625	51953	50056	13188	18174	14029	Bra026099	1	-	-	-	-	-	-
Bra026156	Bra026156.1	AT1G15210	PDR7,ATPDR7	PDR7 (PLEIOTROPIC DRUG RESISTANCE 7);ATPase,coupled to transmembrane movement of substances	-2.61224	8.92199	16814.5	0	0	9.70119	9.68011	9.70025	7.11882	7.03825	7.09248	22384	16548	16636	2960	3787	3070	Bra026156	1	-	-	-	-	-	-
Bra026230	Bra026230.1	AT4G17090	CT-BMY,BAM3,BMY8	CT-BMY (CHLOROPLAST BETA-AMYLASE);beta-amylase	2.25682	6.27763	3988.62	0	0	4.71297	4.64211	4.80406	6.97984	6.99458	6.94214	703	502	557	2688	3674	2766	Bra026230	1	-	-	-	-	-	-
Bra026364	Bra026364.1	AT4G27270	-	quinone reductase family protein	-2.56164	6.86975	4794.57	0	0	7.68661	7.7724	7.81434	5.22286	5.17765	5.23365	5538	4409	4500	794	1041	845	Bra026364	1	-	-	-	-	-	-
Bra026425	Bra026425.1	AT4G26540	-	kinase	2.43058	4.52528	1496.68	0	0	2.74519	2.68499	2.9884	5.17868	5.20504	5.23875	178	128	157	770	1061	848	Bra026425	1	-	-	-	-	-	-
Bra026466	Bra026466.1	AT5G24120	SIGE,SIG5,ATSIG5	SIGE (SIGMA FACTOR E);DNA binding / DNA-directed RNA polymerase/ sigma factor/ transcription factor	-2.76289	5.77838	4816.7	0	0	6.61461	6.62757	6.60343	3.92564	3.76693	3.90814	2633	1993	1943	322	390	336	Bra026466	1	-	-	-	-	-	-
Bra026495	Bra026495.1	AT5G23490	-	unknown protein	-3.05829	7.07525	8897.49	0	0	7.84362	7.87222	7.85697	4.88765	4.80417	4.66725	6175	4725	4635	629	803	570	Bra026495	1	-	-	-	-	-	-
Bra026653	Bra026653.1	AT2G01520	MLP328	MLP328 (MLP-LIKE PROTEIN 328);copper ion binding	-2.54904	4.85815	1762.88	0	0	5.76193	5.60625	5.73298	3.09299	3.192	3.23502	1457	981	1062	180	261	210	Bra026653	1	-	-	-	-	-	-
Bra026797	Bra026797.1	AT1G14860	atnudt18	atnudt18 (Arabidopsis thaliana Nudix hydrolase homolog 18);hydrolase	-2.26808	5.50315	2048.74	0	0	6.23692	6.30469	6.37914	4.06968	4.06179	3.97488	2026	1593	1663	356	479	352	Bra026797	1	-	-	-	-	-	-
Bra026804	Bra026804.1	AT1G14780	-	FUNCTIONS IN: molecular_function unknown;INVOLVED IN: biological_process unknown;LOCATED IN: cellular_component unknown;EXPRESSED IN: 13 plant structures;EXPRESSED DURING: 6 growth stages;CONTAINS InterPro DOMAIN/s: Membrane attack complex component/perforin/complement C9 (InterPro:IPR001862);BEST Arabidopsis thaliana protein match is: unknown protein (TAIR:AT4G24290.2);Has 119 Blast hits to 118 …	-2.89541	5.58727	4568.63	0	0	6.45684	6.42941	6.43607	3.61903	3.51011	3.55158	2360	1737	1730	260	326	262	Bra026804	1	-	-	-	-	-	-
Bra026937	Bra026937.1	AT1G13080	CYP71B2	CYP71B2 (CYTOCHROME P450 71B2);electron carrier/ heme binding / iron ion binding / monooxygenase/ oxygen binding	2.07484	4.83948	1575.74	0	0	3.45205	3.41199	3.42438	5.53612	5.48973	5.47324	292	213	213	987	1293	998	Bra026937	1	-	-	-	-	-	-
Bra026944	Bra026944.1	AT1G12970	-	leucine-rich repeat family protein	2.03155	5.46494	2178.48	0	0	4.11291	4.0696	4.08628	6.16381	6.10501	6.09057	463	337	338	1526	1982	1532	Bra026944	1	-	-	-	-	-	-
Bra026991	Bra026991.1	AT1G12110	NRT1.1,CHL1-1,NRT1,B-1,ATNRT1,CHL1	NRT1.1;nitrate transmembrane transporter/ transporter	3.13716	5.8593	5647.65	0	0	3.58316	3.52812	3.48362	6.65722	6.66788	6.67116	320	231	222	2149	2929	2292	Bra026991	1	-	-	-	-	-	-
Bra027044	Bra027044.1	AT1G62440	LRX2	LRX2 (LEUCINE-RICH REPEAT/EXTENSIN 2);protein binding / structural constituent of cell wall	-3.2887	5.85504	3753.81	0	0	6.7318	6.64483	6.63788	3.66245	3.32278	3.35262	2856	2017	1990	268	286	228	Bra027044	1	-	-	-	-	-	-
Bra027047	Bra027047.1	AT5G41550	-	disease resistance protein (TIR-NBS-LRR class),putative	-3.1513	6.12319	6396.09	0	0	6.97934	7.01307	7.03163	3.80973	3.86635	3.90387	3391	2604	2615	297	418	335	Bra027047	1	-	-	-	-	-	-
Bra027083	Bra027083.1	AT1G61520	LHCA3	LHCA3;chlorophyll binding	-2.2298	11.3724	579411	0	0	12.0979	12.0953	12.0981	9.87071	9.87825	9.85156	117882	88270	87679	19949	27131	20794	Bra027083	1	-	-	-	-	-	-
Bra027243	Bra027243.1	AT3G15450	-	unknown protein	-2.33891	9.85556	190690	0	0	10.614	10.5987	10.5978	8.2943	8.2576	8.2452	42145	31281	30993	6688	8821	6828	Bra027243	1	-	-	-	-	-	-
Bra027431	Bra027431.1	AT3G13470	-	chaperonin,putative	-2.53106	5.20377	2917.15	0	0	6.01847	6.01624	5.98837	3.5044	3.5013	3.44967	1741	1304	1268	240	324	244	Bra027431	1	-	-	-	-	-	-
Bra027465	Bra027465.1	AT5G42900	-	unknown protein	4.65897	4.99668	4497.03	0	0	1.06617	1.3586	1.45202	5.91278	5.87539	5.89118	54	50	53	1282	1690	1334	Bra027465	1	-	-	-	-	-	-
Bra027519	Bra027519.1	AT5G44005	-	unknown protein	-2.98777	4.3835	2046.7	0	0	5.28057	5.19255	5.27375	2.35248	2.24297	2.27485	1043	736	772	107	134	107	Bra027519	1	-	-	-	-	-	-
Bra027569	Bra027569.1	AT5G44730	-	haloacid dehalogenase-like hydrolase family protein	-2.1723	6.07089	3027.25	0	0	6.76966	6.81136	6.86092	4.57759	4.62514	4.72413	2932	2264	2323	507	709	593	Bra027569	1	-	-	-	-	-	-
Bra027602	Bra027602.1	AT5G45340	CYP707A3	CYP707A3;(+)-abscisic acid 8'-hydroxylase/ oxygen binding	-5.00692	6.76187	14653.9	0	0	7.77131	7.74265	7.75246	2.88878	2.72393	2.69671	5873	4319	4311	156	188	144	Bra027602	1	-	-	-	-	-	-
Bra027651	Bra027651.1	AT2G20142	-	transmembrane receptor	-3.94514	3.92551	1791.69	0	0	4.94663	4.86951	4.79888	1.07295	1.04471	0.827069	827	588	555	43	57	38	Bra027651	1	-	-	-	-	-	Resistence gene
Bra027664	Bra027664.1	AT1G63840	-	zinc finger (C3HC4-type RING finger) family protein	-2.56554	5.14459	2854.73	0	0	5.95848	5.94024	5.96547	3.43097	3.4148	3.34633	1670	1237	1248	228	305	227	Bra027664	1	-	-	-	-	-	-
Bra027838	Bra027838.1	AT1G59725	-	DNAJ heat shock protein,putative	-2.9069	6.13839	5107.83	0	0	6.95533	7.03886	6.99194	4.04528	4.07669	4.15477	3335	2651	2544	350	484	399	Bra027838	1	-	-	-	-	-	-
Bra027920	Bra027920.1	unknown protein%3B Has 665200 Blast hits to 205811 proteins in 4684 species: Archae - 3320%3B Bacteria - 107592%3B Metazoa - 249086%3B Fungi - 76753%3B Plants - 38542%3B Viruses - 3008%3B Other Eukaryotes - 186899	-	unknown protein;Has 665200 Blast hits to 205811 proteins in 4684 species: Archae - 3320;Bacteria - 107592;Metazoa - 249086;Fungi - 76753;Plants - 38542;Viruses - 3008;Other Eukaryotes - 186899 (source: NCBI BLink). [Source:TAIR%3BAcc:AT1G56660](projected from arabidopsis_thaliana%2CAT1G56660)	-2.84775	6.86542	6057.11	0	0	7.89951	7.79737	7.79466	4.9892	4.95537	4.98719	6419	4486	4439	675	892	712	Bra027920	1	-	-	-	-	-	-
Bra027981	Bra027981.1	AT5G42380	CML39,CML37	CML37 (CALMODULIN LIKE 37);calcium ion binding	-3.55655	5.50381	3825.66	0	0	6.29546	6.37961	6.35643	2.90694	2.8403	2.49548	2110	1678	1637	158	204	125	Bra027981	1	-	-	-	-	-	-
Bra027987	Bra027987.1	AT5G03610	-	GDSL-motif lipase/hydrolase family protein	7.14036	5.39571	7251.26	0	0	-0.477883	-0.453457	-1.04129	6.32449	6.35716	6.31887	17	13	8	1706	2361	1795	Bra027987	1	-	-	-	-	-	-
Bra028091	Bra028091.1	AT2G18660	EXLB3	EXLB3 (EXPANSIN-LIKE B3 PRECURSOR)	3.56291	6.06022	4799.52	0	0	3.39709	3.5466	3.27589	6.87127	7.00045	6.96951	281	234	192	2493	3689	2819	Bra028091	1	-	-	-	-	-	-
Bra028379	Bra028379.1	AT1G61890	-	MATE efflux family protein	-2.2069	5.82985	2873.64	0	0	6.59754	6.63479	6.53117	4.40299	4.3732	4.39304	2602	2003	1848	449	595	471	Bra028379	1	-	-	-	-	-	-
Bra028419	Bra028419.1	AT4G14365	-	zinc finger (C3HC4-type RING finger) family protein / ankyrin repeat family protein	-2.81387	7.30575	9832.87	0	0	8.1282	8.10406	8.14051	5.28842	5.37866	5.25898	7522	5549	5642	831	1197	860	Bra028419	1	-	-	-	-	-	-
Bra028523	Bra028523.1	AT5G42050	-	FUNCTIONS IN: molecular_function unknown;EXPRESSED IN: 22 plant structures;EXPRESSED DURING: 13 growth stages;CONTAINS InterPro DOMAIN/s: Development and cell death domain (InterPro:IPR013989),Kelch related (InterPro:IPR013089);BEST Arabidopsis thaliana protein match is: unknown protein (TAIR:AT3G27090.1);Has 5084 Blast hits to 2870 proteins in 85 species: Archae - 0;Bacteria - 24;Metazoa - 270;F…	-2.00931	7.82961	8261.69	0	0	8.52412	8.51064	8.55051	6.52673	6.51377	6.52083	9898	7356	7497	1963	2632	2065	Bra028523	1	-	-	-	-	-	-
Bra028533	Bra028533.1	AT3G52800	-	zinc finger (AN1-like) family protein	-2.71734	6.68915	7019.32	0	0	7.49621	7.54393	7.51086	4.79558	4.76053	4.85834	4853	3763	3646	590	779	651	Bra028533	1	-	-	-	-	-	-
Bra028554	Bra028554.1	AT5G11060	KNAT4	KNAT4 (KNOTTED1-LIKE HOMEOBOX GENE 4);transcription activator/ transcription factor	2.25791	5.25862	1959.45	0	0	3.66156	3.69202	3.75873	6.00527	5.89822	5.96075	338	259	269	1367	1717	1400	Bra028554	1	-	-	-	-	-	-
Bra028635	Bra028635.1	AT5G09440	EXL4	EXL4 (EXORDIUM LIKE 4)	2.86983	4.91124	2620.15	0	0	2.81546	2.92046	2.75188	5.6804	5.67841	5.69853	187	151	133	1091	1474	1167	Bra028635	1	-	-	-	-	-	-
Bra028980	Bra028980.1	AT5G55450	-	protease inhibitor/seed storage/lipid transfer protein (LTP) family protein	4.45988	4.21813	2243.34	0	0	0.845101	0.698255	0.521954	5.03947	5.16236	5.08296	46	31	27	699	1030	761	Bra028980	1	-	-	-	-	-	-
Bra028996	Bra028996.1	AT5G55050	-	GDSL-motif lipase/hydrolase family protein	2.2441	5.71518	3124.24	0	0	4.22616	4.1157	4.14045	6.38488	6.42803	6.40156	501	348	351	1779	2480	1901	Bra028996	1	-	-	-	-	-	-
Bra029031	Bra029031.1	AT5G54300	-	unknown protein	-3.31647	4.95756	3388.3	0	0	5.8968	5.8489	5.8262	2.50338	2.6056	2.56211	1600	1161	1133	119	173	131	Bra029031	1	-	-	-	-	-	-
Bra029040	Bra029040.1	AT5G54165	-	unknown protein	-4.63506	6.47296	11233.8	0	0	7.43831	7.44971	7.48532	2.68279	2.86798	2.93325	4662	3525	3582	135	208	170	Bra029040	1	-	-	-	-	-	-
Bra029093	Bra029093.1	AT5G53160	-	unknown protein	2.3093	5.86694	3311.56	0	0	4.29063	4.27932	4.21615	6.526	6.58586	6.59098	524	390	370	1962	2767	2168	Bra029093	1	-	-	-	-	-	-
Bra029145	Bra029145.1	AT5G52050	-	MATE efflux protein-related	-3.34134	4.39987	2087.4	0	0	5.25411	5.29992	5.37977	1.8688	2.05105	2.03006	1024	793	831	76	117	90	Bra029145	1	-	-	-	-	-	-
Bra029259	Bra029259.1	AT5G62460	-	zinc finger (C3HC4-type RING finger) family protein	-2.91238	4.47019	2127.28	0	0	5.35324	5.28716	5.34114	2.40456	2.39341	2.51803	1097	786	809	111	149	127	Bra029259	1	-	-	-	-	-	-
Bra029278	Bra029278.1	AT5G62180	AtCXE20	AtCXE20 (Arabidopsis thaliana carboxyesterase 20);carboxylesterase	4.14084	5.22508	4812.53	0	0	1.84047	2.12064	2.03066	6.08123	6.12092	6.08869	94	86	80	1441	2004	1530	Bra029278	1	-	-	-	-	-	-
Bra029301	Bra029301.1	AT5G61900	BON1,CPN1,BON	BON1 (BONZAI 1);calcium-dependent phospholipid binding	-2.14694	6.52721	4661.08	0	0	7.26079	7.2462	7.27554	5.10781	5.1735	5.05045	4122	3061	3097	733	1038	744	Bra029301	1	-	-	-	-	-	-
Bra029309	Bra029309.1	AT5G61780	-	tudor domain-containing protein / nuclease family protein	2.07297	5.78023	1877.8	0	0	4.15868	4.36511	4.37059	6.36448	6.3412	6.4338	478	414	412	1754	2335	1944	Bra029309	1	-	-	-	-	-	-
Bra029505	Bra029505.1	AT4G04610	APR1,APR,PRH19,ATAPR1	APR1 (APS REDUCTASE 1);adenylyl-sulfate reductase	-3.31429	6.49447	8393.97	0	0	7.37314	7.40568	7.4012	3.9867	4.13197	4.11093	4456	3419	3379	336	503	387	Bra029505	1	-	-	-	-	-	-
Bra029641	Bra029641.1	AT3G07350	-	unknown protein	-2.78961	4.3382	1529.78	0	0	5.14311	5.0659	5.1873	2.07567	2.41234	2.47256	948	674	727	88	151	123	Bra029641	1	-	-	-	-	-	-
Bra029642	Bra029642.1	AT3G07360	PUB9,ATPUB9	PUB9 (PLANT U-BOX 9);ubiquitin-protein ligase	-2.31224	5.28363	2261.9	0	0	5.95762	6.00403	5.99969	3.87578	3.62813	3.63133	1669	1293	1278	311	354	277	Bra029642	1	-	-	-	-	-	-
Bra029712	Bra029712.1	AT3G08720	ATPK19,ATS6K2,S6K2,ATPK2	S6K2 (ARABIDOPSIS THALIANA SERINE/THREONINE PROTEIN KINASE 2);kinase/ protein kinase	-2.6051	8.01387	7768.52	0	0	8.70018	8.73012	8.75585	6.08423	6.2162	6.09901	11183	8565	8644	1444	2141	1541	Bra029712	1	-	-	-	-	-	-
Bra029848	Bra029848.1	AT3G10525	-	FUNCTIONS IN: molecular_function unknown;INVOLVED IN: biological_process unknown;LOCATED IN: cellular_component unknown;EXPRESSED IN: 22 plant structures;EXPRESSED DURING: 13 growth stages;BEST Arabidopsis thaliana protein match is: SIM (SIAMESE);cyclin-dependent protein kinase inhibitor (TAIR:AT5G04470.1);Has 23 Blast hits to 23 proteins in 6 species: Archae - 0;Bacteria - 0;Metazoa - 0;Fungi - …	2.06431	5.72748	1978.27	0	0	4.40393	4.19983	4.1688	6.26939	6.33378	6.30191	567	369	358	1642	2323	1774	Bra029848	1	-	-	-	-	-	-
Bra030156	Bra030156.1	AT1G29670	-	GDSL-motif lipase/hydrolase family protein	4.79273	3.79757	1989.87	0	0	-0.335699	0.351125	0.0508783	4.64408	4.74195	4.67229	19	24	19	531	769	572	Bra030156	1	-	-	-	-	-	-
Bra030167	Bra030167.1	AT1G29740	-	kinase	4.38547	4.49804	2939.37	0	0	0.987186	1.11623	1.06067	5.42706	5.38466	5.32762	51	42	40	915	1202	902	Bra030167	1	-	-	-	-	-	-
Bra030181	Bra030181.1	AT1G29930	CAB1,AB140,CAB140,LHCB1.3	CAB1 (CHLOROPHYLL A/B BINDING PROTEIN 1);chlorophyll binding	-2.48165	6.74472	2764.07	0	0	7.8739	7.74098	7.64088	5.28669	5.21046	5.30186	6306	4314	3990	830	1065	886	Bra030181	1	-	-	-	-	-	-
Bra030182	Bra030182.1	AT1G29930	CAB1,AB140,CAB140,LHCB1.3	CAB1 (CHLOROPHYLL A/B BINDING PROTEIN 1);chlorophyll binding	-2.60892	12.2011	428154	0	0	12.9826	12.9826	12.9879	10.3673	10.378	10.3801	217657	163276	162465	28146	38363	29996	Bra030182	1	-	-	-	-	-	-
Bra030253	Bra030253.1	AT2G22240	ATMIPS2,MIPS2	MIPS2 (MYO-INOSITOL-1-PHOSTPATE SYNTHASE 2);binding / catalytic/ inositol-3-phosphate synthase	-2.58588	6.34539	4312	0	0	7.06276	7.06259	7.12605	4.32744	4.55875	4.51579	3593	2695	2792	426	677	513	Bra030253	1	-	-	-	-	-	-
Bra030284	Bra030284.1	AT2G21660	ATGRP7,CCR2,GR-RBP7,GRP7	CCR2 (COLD,CIRCADIAN RHYTHM,AND RNA BINDING 2);RNA binding / double-stranded DNA binding / single-stranded DNA binding	2.34037	8.4204	12002.8	0	0	6.79549	6.79471	6.82383	9.13655	9.12797	9.16709	2985	2238	2264	11992	16128	12938	Bra030284	1	-	-	-	-	-	-
Bra030507	Bra030507.1	AT1G02660	-	lipase class 3 family protein	-3.94907	5.72315	6208.09	0	0	6.64388	6.70981	6.67859	2.62908	2.79775	2.77371	2687	2110	2047	130	198	152	Bra030507	1	-	-	-	-	-	-
Bra030589	Bra030589.1	AT1G04770	-	male sterility MS5 family protein	-3.55856	4.92387	2247.65	0	0	5.72386	5.85756	5.86509	2.27067	2.13319	2.58365	1419	1168	1164	101	124	133	Bra030589	1	-	-	-	-	-	-
Bra030674	Bra030674.1	AT1G07135	-	glycine-rich protein	-2.71025	5.41619	2613.54	0	0	6.31581	6.35623	6.20528	3.52218	3.64423	3.62614	2140	1651	1474	243	358	276	Bra030674	1	-	-	-	-	-	-
Bra030910	Bra030910.1	AT1G54050	-	17.4 kDa class III heat shock protein (HSP17.4-CIII)	-5.06325	4.1614	2906.73	0	0	5.15521	5.17682	5.15324	0.385128	-0.178453	0.411228	956	728	710	26	23	28	Bra030910	1	-	-	-	-	-	-
Bra030917	Bra030917.1	AT1G53990	GLIP3	GLIP3;carboxylesterase/ lipase	3.55735	4.71755	2709.35	0	0	1.77927	2.23138	2.0129	5.51851	5.51512	5.50039	90	93	79	975	1316	1017	Bra030917	1	-	-	-	-	-	-
Bra031029	Bra031029.1	AT1G18460	-	lipase family protein	-2.14787	5.33221	2284.85	0	0	6.04877	6.01513	6.05607	3.79517	4.00682	3.87358	1778	1303	1329	294	461	328	Bra031029	1	-	-	-	-	-	-
Bra031048	Bra031048.1	AT1G18740	-	unknown protein	-3.61057	6.57627	9881.39	0	0	7.51539	7.48766	7.49015	3.94335	3.8834	3.86481	4918	3619	3594	326	423	326	Bra031048	1	-	-	-	-	-	-
Bra031061	Bra031061.1	AT1G19020	-	unknown protein	-3.54794	3.69681	1571.03	0	0	4.56671	4.66202	4.65169	1.13591	1.09242	1.14948	635	509	501	45	59	48	Bra031061	1	-	-	-	-	-	-
Bra031074	Bra031074.1	AT1G19320	-	pathogenesis-related thaumatin family protein	3.91599	6.84832	11580.6	0	0	3.81428	3.7935	3.8264	7.70802	7.73836	7.70965	376	278	282	4454	6154	4710	Bra031074	1	-	-	-	-	-	-
Bra031080	Bra031080.1	AT1G19400	-	unknown protein	-3.17811	4.41597	2037.4	0	0	5.22715	5.31796	5.28119	2.05952	2.00192	2.33959	1005	803	776	87	113	112	Bra031080	1	-	-	-	-	-	-
Bra031127	Bra031127.1	AT2G20560	-	DNAJ heat shock family protein	-2.11421	5.01363	1613.9	0	0	5.80094	5.69451	5.72209	3.55711	3.65618	3.68713	1497	1043	1054	249	361	288	Bra031127	1	-	-	-	-	-	-
Bra031195	Bra031195.1	AT2G21510	-	DNAJ heat shock N-terminal domain-containing protein	-2.7921	4.81851	2561.27	0	0	5.68789	5.62376	5.66637	2.95138	2.87482	2.82888	1384	993	1014	163	209	158	Bra031195	1	-	-	-	-	-	-
Bra031210	Bra031210.1	AT2G21660	ATGRP7,CCR2,GR-RBP7,GRP7	CCR2 (COLD,CIRCADIAN RHYTHM,AND RNA BINDING 2);RNA binding / double-stranded DNA binding / single-stranded DNA binding	3.15573	9.31227	59749.9	0	0	6.99708	7.0053	6.96679	10.1497	10.1392	10.148	3433	2590	2500	24206	32511	25537	Bra031210	1	-	-	-	-	-	-
Bra031255	Bra031255.1	AT3G21150	-	zinc finger (B-box type) family protein	-4.12096	3.82811	1569.14	0	0	4.66091	4.65636	4.778	0.865655	0.7196	-0.104724	678	507	547	37	45	19	Bra031255	1	-	-	-	-	-	-
Bra031349	Bra031349.1	AT3G22310	PMH1,ATRH9	PMH1 (PUTATIVE MITOCHONDRIAL RNA HELICASE 1);ATP-dependent helicase/ DNA binding / RNA binding	2.18045	5.1712	2141.53	0	0	3.69922	3.66972	3.65375	5.82952	5.87283	5.84063	347	255	250	1210	1687	1288	Bra031349	1	-	-	-	-	-	-
Bra031387	Bra031387.1	AT1G22360	AtUGT85A2	AtUGT85A2 (UDP-glucosyl transferase 85A2);UDP-glycosyltransferase/ glucuronosyltransferase/ transferase,transferring glycosyl groups	2.60235	5.20112	2292.81	0	0	3.39199	3.378	3.3199	5.8867	5.96703	6.01031	280	208	198	1259	1801	1449	Bra031387	1	-	-	-	-	-	-
Bra031401	Bra031401.1	AT1G61740	-	unknown protein	2.91509	4.95083	2747.6	0	0	2.86048	2.87244	2.74113	5.69615	5.76101	5.723	193	146	132	1103	1561	1187	Bra031401	1	-	-	-	-	-	-
Bra031656	Bra031656.1	AT1G09070	SRC2	SRC2 (SOYBEAN GENE REGULATED BY COLD-2);protein binding	-2.40425	9.16577	57140.5	0	0	9.9249	9.94461	9.9155	7.5268	7.50843	7.54129	26139	19878	19313	3928	5247	4191	Bra031656	1	-	-	-	-	-	-
Bra031690	Bra031690.1	AT1G09940	HEMA2	HEMA2;glutamyl-tRNA reductase	-3.47153	6.90079	9782.33	0	0	7.83307	7.81906	7.77141	4.28986	4.31154	4.42919	6130	4554	4368	415	570	483	Bra031690	1	-	-	-	-	-	-
Bra031927	Bra031927.1	AT5G64260	EXL2	EXL2 (EXORDIUM LIKE 2)	-2.14585	8.45097	17123.5	0	0	9.15975	9.17348	9.18659	7.02784	7.03444	7.01877	15379	11647	11652	2779	3777	2917	Bra031927	1	-	-	-	-	-	-
Bra032288	Bra032288.1	AT1G49500	-	unknown protein	-3.32822	4.34858	1526.37	0	0	5.53893	5.3269	5.32503	2.16895	2.12174	1.91581	1248	808	800	94	123	83	Bra032288	1	-	-	-	-	-	-
Bra032293	Bra032293.1	AT4G01360	-	FUNCTIONS IN: molecular_function unknown;INVOLVED IN: biological_process unknown;BEST Arabidopsis thaliana protein match is: BPS1 (BYPASS 1) (TAIR:AT1G01550.2);Has 59 Blast hits to 59 proteins in 12 species: Archae - 0;Bacteria - 1;Metazoa - 0;Fungi - 0;Plants - 58;Viruses - 0;Other Eukaryotes - 0 (source: NCBI BLink).	-4.35002	5.09815	3694.02	0	0	6.01184	6.08317	6.1454	1.8121	1.87124	1.55048	1733	1366	1414	73	103	64	Bra032293	1	-	-	-	-	-	-
Bra032309	Bra032309.1	AT1G29340	PUB17,ATPUB17	PUB17 (PLANT U-BOX 17);ubiquitin-protein ligase	-2.92585	5.84319	4474.04	0	0	6.60693	6.63479	6.6328	3.88039	3.59538	3.72154	2619	2003	1983	312	346	295	Bra032309	1	-	-	-	-	-	-
Bra032345	Bra032345.1	AT2G34430	LHB1B1,LHCB1.4	LHB1B1;chlorophyll binding	-2.28954	11.4707	504578	0	0	12.2064	12.2051	12.2047	9.93201	9.91048	9.90662	127090	95252	94404	20815	27744	21603	Bra032345	1	-	-	-	-	-	-
Bra032356	Bra032356.1	AT1G30070	-	SGS domain-containing protein	-2.63178	5.21926	2480.25	0	0	6.03983	5.9759	6.09141	3.27186	3.45642	3.48445	1767	1268	1362	204	314	250	Bra032356	1	-	-	-	-	-	-
Bra032371	Bra032371.1	AT1G30260	-	FUNCTIONS IN: molecular_function unknown;INVOLVED IN: response to cytokinin stimulus;EXPRESSED IN: 18 plant structures;EXPRESSED DURING: 10 growth stages;BEST Arabidopsis thaliana protein match is: galactosyltransferase family protein (TAIR:AT4G21060.1);Has 16 Blast hits to 16 proteins in 5 species: Archae - 0;Bacteria - 0;Metazoa - 0;Fungi - 0;Plants - 16;Viruses - 0;Other Eukaryotes - 0 (source…	3.27227	4.11411	1669.44	0	0	1.52344	1.59	1.92064	4.88078	4.90782	4.89972	75	59	74	626	863	670	Bra032371	1	-	-	-	-	-	-
Bra032485	Bra032485.1	AT5G40170	AtRLP54	AtRLP54 (Receptor Like Protein 54);kinase/ protein binding	-2.1801	5.36119	1655.75	0	0	6.10441	6.18889	6.27773	3.97383	4.01922	4.03085	1848	1470	1550	333	465	366	Bra032485	1	-	-	-	-	-	-
Bra032590	Bra032590.1	AT5G38700	-	unknown protein	-6.35867	4.79973	5128.6	0	0	5.84173	5.79968	5.8539	-0.623697	-0.236224	-0.327883	1540	1122	1155	12	22	16	Bra032590	1	-	-	-	-	-	-
Bra032591	Bra032591.1	AT1G02660	-	lipase class 3 family protein	-3.50356	8.01936	24217.9	0	0	8.92663	8.92088	8.91764	5.43334	5.41312	5.41884	13084	9776	9670	919	1226	961	Bra032591	1	-	-	-	-	-	-
Bra032622	Bra032622.1	AT1G01140	CIPK9,SnRK3.12,PKS6	CIPK9 (CBL-INTERACTING PROTEIN KINASE 9);ATP binding / kinase/ protein kinase/ protein serine/threonine kinase	-3.14596	7.76818	9468.84	0	0	8.80104	8.69914	8.72856	5.59474	5.60526	5.5722	11993	8383	8482	1028	1401	1069	Bra032622	1	-	-	-	-	-	-
Bra032734	Bra032734.1	AT4G13770	CYP83A1,REF2	CYP83A1 (CYTOCHROME P450 83A1);oxidoreductase,acting on paired donors,with incorporation or reduction of molecular oxygen,NADH or NADPH as one donor,and incorporation of one atom of oxygen / oxygen binding	2.73574	5.78747	4072.13	0	0	3.81428	3.75694	3.89103	6.51123	6.5617	6.5709	376	271	295	1942	2721	2138	Bra032734	1	-	-	Glucosinolate genes	-	-	-
Bra032747	Bra032747.1	AT4G13810	AtRLP47	AtRLP47 (Receptor Like Protein 47);protein binding	-2.79387	5.72284	4784.42	0	0	6.55653	6.56701	6.57117	3.80004	3.73722	3.80645	2529	1911	1900	295	382	313	Bra032747	1	-	-	-	-	-	-
Bra032795	Bra032795.1	AT1G24530	-	transducin family protein / WD-40 repeat family protein	-2.06851	5.00245	1628.14	0	0	5.76982	5.72998	5.65925	3.64632	3.66015	3.68214	1465	1069	1009	265	362	287	Bra032795	1	-	-	-	-	-	-
Bra032902	Bra032902.1	AT1G28380	NSL1	NSL1 (necrotic spotted lesions 1)	-2.28931	6.83918	5135.85	0	0	7.63086	7.55728	7.59647	5.24802	5.33469	5.33717	5328	3798	3869	808	1161	908	Bra032902	1	-	-	-	-	-	-
Bra032951	Bra032951.1	AT3G26770	-	short-chain dehydrogenase/reductase (SDR) family protein	-2.25802	5.49794	2685.3	0	0	6.24826	6.30198	6.21794	3.98242	3.9817	4.05032	2042	1590	1487	335	453	371	Bra032951	1	-	-	-	-	-	-
Bra033022	Bra033022.1	AT2G05100	LHCB2.1,LHCB2	LHCB2.1;chlorophyll binding	-3.45059	10.7856	1.47274e+06	0	0	11.6529	11.6684	11.6756	8.22766	8.21781	8.20015	86598	65660	65420	6386	8581	6618	Bra033022	1	-	-	-	-	-	-
Bra033070	Bra033070.1	AT3G28940	-	avirulence-responsive protein,putative / avirulence induced gene (AIG) protein,putative	-2.0079	5.51496	2537.71	0	0	6.21398	6.25218	6.20724	4.2619	4.19889	4.20776	1994	1536	1476	407	527	414	Bra033070	1	-	-	-	-	-	-
Bra033077	Bra033077.1	AT5G39670	-	calcium-binding EF hand family protein	-2.19888	4.89746	1661.58	0	0	5.68372	5.57958	5.66067	3.54556	3.37676	3.46136	1380	963	1010	247	297	246	Bra033077	1	-	-	-	-	-	-
Bra033092	Bra033092.1	AT3G29240	-	unknown protein	2.59071	5.29039	2980.93	0	0	3.38687	3.49679	3.48362	6.03758	6.02043	6.03984	279	226	222	1398	1869	1479	Bra033092	1	-	-	-	-	-	-
Bra033198	Bra033198.1	AT2G07180	-	protein kinase,putative	-2.40517	5.83576	3807.3	0	0	6.61187	6.59391	6.65086	4.16711	4.19343	4.29523	2628	1947	2008	381	525	440	Bra033198	1	-	-	-	-	-	-
Bra033324	Bra033324.1	AT1G02400	ATGA2OX4,ATGA2OX6,DTA1,GA2OX6	GA2OX6 (GIBBERELLIN 2-OXIDASE 6);gibberellin 2-beta-dioxygenase	-4.35391	5.1526	4774.04	0	0	6.16248	6.12987	6.08505	1.69152	1.74257	1.9822	1924	1411	1356	67	94	87	Bra033324	1	-	-	-	-	-	-
Bra033436	Bra033436.1	AT3G52400	SYP122,ATSYP122	SYP122 (SYNTAXIN OF PLANTS 122);SNAP receptor	-3.37074	6.58991	8015.51	0	0	7.52241	7.48925	7.45563	4.19325	4.03457	4.17265	4942	3623	3509	388	470	404	Bra033436	1	-	-	-	-	-	-
Bra033648	Bra033648.1	AT5G42900	-	unknown protein	5.79749	5.22658	4748.17	0	0	0.022203	0.653492	0.571336	6.07923	6.17801	6.10926	25	30	28	1439	2085	1552	Bra033648	1	-	-	-	-	-	-
Bra033938	Bra033938.1	AT1G68410	-	protein phosphatase 2C-related / PP2C-related	-2.87169	6.11184	5724.84	0	0	6.93662	6.98003	6.97484	4.09367	4.04975	4.15477	3292	2545	2514	362	475	399	Bra033938	1	-	-	-	-	-	-
Bra034140	Bra034140.1	AT3G10720	-	pectinesterase,putative	-3.89347	6.85354	12382.3	0	0	7.77719	7.8057	7.80631	3.88955	3.87319	3.9708	5897	4512	4475	314	420	351	Bra034140	1	-	-	-	-	-	-
Bra034163	Bra034163.1	AT5G27060	AtRLP53	AtRLP53 (Receptor Like Protein 53);kinase/ protein binding	2.65318	6.98809	8346.19	0	0	5.14007	5.0357	5.09745	7.74004	7.75374	7.74444	946	660	683	4554	6220	4825	Bra034163	1	-	-	-	-	-	-
Bra034164	Bra034164.1	AT3G11080	AtRLP35	AtRLP35 (Receptor Like Protein 35);kinase/ protein binding	2.13309	6.16083	3430.65	0	0	4.68613	4.76029	4.67446	6.85147	6.85501	6.79522	690	545	509	2459	3335	2498	Bra034164	1	-	-	-	-	-	-
Bra034321	Bra034321.1	AT2G27080	-	harpin-induced protein-related / HIN1-related / harpin-responsive protein-related	-2.74496	6.62613	7048.32	0	0	7.4497	7.48447	7.43785	4.67885	4.72312	4.74101	4699	3611	3466	544	759	600	Bra034321	1	-	-	-	-	-	-
Bra034592	Bra034592.1	AT4G33920	-	protein phosphatase 2C family protein / PP2C family protein	-2.87947	6.69826	6017.16	0	0	7.47224	7.42994	7.42993	4.74851	4.48915	4.58151	4773	3477	3447	571	645	537	Bra034592	1	-	-	-	-	-	-
Bra034648	Bra034648.1	AT4G34710	ADC2,SPE2,ATADC2	ADC2 (ARGININE DECARBOXYLASE 2);arginine decarboxylase	-2.26275	8.48462	11356.1	0	0	9.21865	9.21595	9.19141	6.99638	6.91512	6.94214	16020	11995	11691	2719	3477	2766	Bra034648	1	-	-	-	-	-	-
Bra034666	Bra034666.1	AT4G34950	-	nodulin family protein	3.48043	5.91814	6391.73	0	0	3.31323	3.36418	3.15962	6.73491	6.76448	6.76077	265	206	177	2268	3132	2439	Bra034666	1	-	-	-	-	-	-
Bra034817	Bra034817.1	AT3G11700	FLA18	FLA18 (FASCICLIN-LIKE ARABINOGALACTAN PROTEIN 18 PRECURSOR)	-2.06046	6.46394	4210.33	0	0	7.16349	7.20365	7.17779	5.13889	5.08486	5.15309	3853	2972	2894	749	976	799	Bra034817	1	-	-	-	-	-	-
Bra034818	Bra034818.1	AT3G11690	-	unknown protein	-2.95149	4.14783	1730.36	0	0	5.04578	4.97787	5.00163	2.15382	2.14455	1.93269	886	634	639	93	125	84	Bra034818	1	-	-	-	-	-	-
Bra034845	Bra034845.1	AT3G11410	ATPP2CA,AHG3,PP2CA	PP2CA (ARABIDOPSIS THALIANA PROTEIN PHOSPHATASE 2CA);protein binding / protein serine/threonine phosphatase	-2.45719	7.07406	6982.11	0	0	7.80312	7.83512	7.82806	5.38231	5.40724	5.27562	6004	4605	4543	887	1221	870	Bra034845	1	-	-	-	-	-	-
Bra034941	Bra034941.1	AT4G31500	CYP83B1,SUR2,RNT1,RED1,ATR4	CYP83B1 (CYTOCHROME P450 MONOOXYGENASE 83B1);oxidoreductase,acting on paired donors,with incorporation or reduction of molecular oxygen,NADH or NADPH as one donor,and incorporation of one atom of oxygen / oxygen binding	2.08507	8.05405	11649.5	0	0	6.67624	6.62685	6.62843	8.73325	8.73008	8.72988	2748	1992	1977	9067	12240	9555	Bra034941	1	-	-	Glucosinolate genes	-	-	-
Bra035067	Bra035067.1	AT1G78830	-	curculin-like (mannose-binding) lectin family protein	-2.37837	8.53939	10703.2	0	0	9.32878	9.29594	9.27727	6.89536	6.95398	6.91584	17291	12679	12408	2535	3572	2716	Bra035067	1	-	-	-	-	-	-
Bra035236	Bra035236.1	AT4G11280	ACS6	ACS6 (1-AMINOCYCLOPROPANE-1-CARBOXYLIC ACID (ACC) SYNTHASE 6);1-aminocyclopropane-1-carboxylate synthase	-3.0542	8.22569	17641.7	0	0	9.10342	9.07083	9.07157	6.02308	6.03271	6.03398	14790	10847	10759	1384	1885	1473	Bra035236	1	-	-	-	-	-	-
Bra035415	Bra035415.1	AT1G59910	-	formin homology 2 domain-containing protein / FH2 domain-containing protein	-2.50581	5.43247	3309.02	0	0	6.22406	6.24088	6.20528	3.59682	3.75215	3.79726	2008	1524	1474	256	386	311	Bra035415	1	-	-	-	-	-	-
Bra035505	Bra035505.1	AT1G32920	-	unknown protein	-2.502	7.00133	7494.71	0	0	7.80144	7.76945	7.81049	5.32097	5.31974	5.23706	5997	4400	4488	850	1149	847	Bra035505	1	-	-	-	-	-	-
Bra035641	Bra035641.1	AT5G56980	-	unknown protein	-3.52701	7.20145	8639.74	0	0	7.91582	7.96014	7.92236	4.56905	4.27582	4.42323	6492	5022	4850	504	556	481	Bra035641	1	-	-	-	-	-	-
Bra035742	Bra035742.1	AT3G20810	-	transcription factor jumonji (jmjC) domain-containing protein	7.07217	4.27079	2821.72	0	0	-1.24964	-2.09175	-1.37374	5.20278	5.14266	5.28058	9	3	6	783	1016	873	Bra035742	1	-	-	-	-	-	-
Bra035833	Bra035833.1	AT3G19970	-	unknown protein	-3.47913	3.87585	1609.64	0	0	4.78284	4.72827	4.87461	1.33689	1.48096	1.20614	738	533	585	52	78	50	Bra035833	1	-	-	-	-	-	-
Bra035897	Bra035897.1	AT5G62360	-	invertase/pectin methylesterase inhibitor family protein	2.52373	6.26107	5160.22	0	0	4.46835	4.44279	4.52582	6.98733	6.99849	7.00637	593	437	459	2702	3684	2892	Bra035897	1	-	-	-	-	-	-
Bra036269	Bra036269.1	AT4G02420	-	lectin protein kinase,putative	-2.44627	8.27571	17861.1	0	0	9.04388	9.04737	9.0445	6.64713	6.56804	6.5943	14192	10672	10559	2134	2733	2173	Bra036269	1	-	-	-	-	-	-
Bra036278	Bra036278.1	AT4G02330	ATPMEPCRB	ATPMEPCRB;pectinesterase	-2.49317	7.13326	8176.8	0	0	7.91715	7.94745	7.90862	5.43959	5.45136	5.40378	6498	4978	4804	923	1259	951	Bra036278	1	-	-	-	-	-	-
Bra036774	Bra036774.1	AT1G36370	SHM7	SHM7 (serine hydroxymethyltransferase 7);catalytic/ glycine hydroxymethyltransferase/ pyridoxal phosphate binding	-3.59176	6.2182	8363.15	0	0	7.14655	7.15129	7.12554	3.60241	3.57873	3.49016	3808	2866	2791	257	342	251	Bra036774	1	-	-	-	-	-	-
Bra036862	Bra036862.1	AT3G50800	-	unknown protein	-2.29149	5.90198	3987.89	0	0	6.65084	6.66681	6.6807	4.37715	4.40898	4.33706	2700	2048	2050	441	610	453	Bra036862	1	-	-	-	-	-	-
Bra036864	Bra036864.1	AT4G14500	-	FUNCTIONS IN: molecular_function unknown;INVOLVED IN: biological_process unknown;LOCATED IN: cellular_component unknown;EXPRESSED IN: 24 plant structures;EXPRESSED DURING: 15 growth stages;CONTAINS InterPro DOMAIN/s: Lipid-binding START (InterPro:IPR002913);BEST Arabidopsis thaliana protein match is: unknown protein (TAIR:AT3G23080.1);Has 257 Blast hits to 256 proteins in 63 species: Archae - 0;B…	-2.36091	4.78098	1966.42	0	0	5.54123	5.57208	5.56792	3.31331	3.119	3.21445	1250	958	947	210	248	207	Bra036864	1	-	-	-	-	-	-
Bra037112	Bra037112.1	AT5G67360	ARA12	ARA12;serine-type endopeptidase	3.09176	7.75684	16678.4	0	0	5.52385	5.49331	5.41401	8.56862	8.5722	8.57413	1235	907	851	8089	10971	8577	Bra037112	1	-	-	-	-	-	-
Bra037113	Bra037113.1	AT5G67360	ARA12	ARA12;serine-type endopeptidase	2.78931	6.36238	5743.13	0	0	4.40139	4.28667	4.34242	7.12465	7.11714	7.16305	566	392	404	2972	4000	3224	Bra037113	1	-	-	-	-	-	-
Bra037115	Bra037115.1	AT5G67360	ARA12	ARA12;serine-type endopeptidase	2.66723	6.45762	6104.06	0	0	4.55763	4.58366	4.51008	7.20852	7.21806	7.21617	631	482	454	3150	4290	3345	Bra037115	1	-	-	-	-	-	-
Bra037137	Bra037137.1	AT5G66920	sks17	sks17 (SKU5 Similar 17);copper ion binding / oxidoreductase	-2.32359	5.48945	2623.35	0	0	6.25108	6.24654	6.33604	3.95212	3.96897	3.94606	2046	1530	1614	328	449	345	Bra037137	1	-	-	-	-	-	-
Bra037181	Bra037181.1	AT5G66210	CPK28	CPK28;ATP binding / calcium ion binding / calmodulin-dependent protein kinase/ protein kinase/ protein serine/threonine kinase	-2.21656	6.87818	5257.52	0	0	7.65289	7.62659	7.58223	5.39202	5.40724	5.42482	5410	3985	3831	893	1221	965	Bra037181	1	-	-	-	-	-	-
Bra037247	Bra037247.1	AT2G17880	-	DNAJ heat shock protein,putative	-3.40612	4.42922	2112.97	0	0	5.30656	5.29264	5.21669	2.19875	1.72754	1.89872	1062	789	742	96	93	82	Bra037247	1	-	-	-	-	-	-
Bra037386	Bra037386.1	AT4G01070	GT72B1,UGT72B1	GT72B1;UDP-glucosyltransferase/ UDP-glycosyltransferase/ transferase,transferring glycosyl groups	-2.73573	4.33961	1717.34	0	0	5.19529	5.11006	5.21475	2.58463	2.42171	2.37709	983	695	741	126	152	115	Bra037386	1	-	-	-	-	-	-
Bra037471	Bra037471.1	AT5G48655	-	zinc finger (C3HC4-type RING finger) family protein	-2.71436	4.82807	2225.26	0	0	5.66164	5.60625	5.71387	2.95138	3.04211	2.85569	1359	981	1048	163	235	161	Bra037471	1	-	-	-	-	-	-
Bra037477	Bra037477.1	AT5G48570	ROF2,ATFKBP65	peptidyl-prolyl cis-trans isomerase,putative / FK506-binding protein,putative	-3.06229	4.45912	1667.62	0	0	5.28746	5.38281	5.46879	2.27067	2.35481	2.3647	1048	840	884	101	145	114	Bra037477	1	-	-	-	-	-	-
Bra037542	Bra037542.1	AT3G19030	-	unknown protein	-2.72253	6.42828	4610.67	0	0	7.27887	7.21573	7.19167	4.38041	4.57773	4.51859	4174	2997	2922	442	686	514	Bra037542	1	-	-	-	-	-	-
Bra037578	Bra037578.1	AT3G18560	-	unknown protein	-2.87874	4.5098	2032.96	0	0	5.32139	5.3621	5.42412	2.53877	2.47668	2.5068	1073	828	857	122	158	126	Bra037578	1	-	-	-	-	-	-
Bra037739	Bra037739.1	AT2G43050	ATPMEPCRD	ATPMEPCRD;enzyme inhibitor/ pectinesterase	3.1732	4.65564	1945.74	0	0	2.48265	2.15316	1.95825	5.37254	5.32099	5.33081	148	88	76	881	1150	904	Bra037739	1	-	-	-	-	-	-
Bra037741	Bra037741.1	AT2G43020	ATPAO2	ATPAO2 (Polyamine oxidase 2);amine oxidase/ electron carrier/ oxidoreductase	3.33013	5.43225	4411.62	0	0	2.88247	2.84284	3.08508	6.24728	6.2316	6.27568	196	143	168	1617	2164	1742	Bra037741	1	-	-	-	-	-	-
Bra037811	Bra037811.1	AT5G65300	-	unknown protein	-2.04519	6.11614	2980.95	0	0	6.79114	6.8234	6.75938	4.67621	4.7382	4.85834	2976	2283	2165	543	767	651	Bra037811	1	-	-	-	-	-	-
Bra037954	Bra037954.1	AT1G54020	-	myrosinase-associated protein,putative	2.57768	7.07241	7285.49	0	0	5.2414	5.28899	5.20696	7.78831	7.84057	7.82974	1015	787	737	4709	6606	5119	Bra037954	1	-	-	-	-	-	-
Bra038111	Bra038111.1	AT1G53210	-	sodium/calcium exchanger family protein / calcium-binding EF hand family protein	-2.05191	7.86218	8026.48	0	0	8.57227	8.55372	8.58078	6.52306	6.47435	6.56482	10234	7579	7656	1958	2561	2129	Bra038111	1	-	-	-	-	-	-
Bra038205	Bra038205.1	AT3G19380	PUB25	PUB25 (PLANT U-BOX 25);binding / ubiquitin-protein ligase	-2.37717	4.66974	1839.79	0	0	5.45947	5.41334	5.47529	3.10878	3.0299	3.12911	1181	858	888	182	233	195	Bra038205	1	-	-	-	-	-	-
Bra038227	Bra038227.1	AT1G50040	-	unknown protein	-2.00827	5.51619	2540.85	0	0	6.22549	6.25031	6.19842	4.2619	4.19889	4.21122	2010	1534	1467	407	527	415	Bra038227	1	-	-	-	-	-	-
Bra038281	Bra038281.1	AT3G45640	ATMPK3,MPK3	ATMPK3 (ARABIDOPSIS THALIANA MITOGEN-ACTIVATED PROTEIN KINASE 3);MAP kinase/ kinase/ protein binding / protein kinase	-2.33328	8.44286	18636.4	0	0	9.20253	9.19999	9.19178	6.87877	6.86406	6.85569	15842	11863	11694	2506	3356	2605	Bra038281	1	-	-	-	-	-	-
Bra038517	Bra038517.1	AT2G22500	UCP5,ATPUMP5,DIC1	UCP5 (UNCOUPLING PROTEIN 5);binding	-2.51612	7.69579	9710.38	0	0	8.46249	8.50494	8.49481	6.01995	5.96943	5.92744	9484	7327	7213	1381	1804	1368	Bra038517	1	-	-	-	-	-	-
Bra038521	Bra038521.1	-	-	-	-2.94474	6.40809	7003.68	0	0	7.27887	7.25325	7.26197	4.38366	4.34393	4.24542	4174	3076	3068	443	583	425	Bra038521	1	-	-	-	-	-	-
Bra038538	Bra038538.1	AT2G22240	ATMIPS2,MIPS2	MIPS2 (MYO-INOSITOL-1-PHOSTPATE SYNTHASE 2);binding / catalytic/ inositol-3-phosphate synthase	-3.48934	4.54031	2772.52	0	0	5.47764	5.44159	5.45734	1.92337	1.97671	2.09151	1196	875	877	79	111	94	Bra038538	1	-	-	-	-	-	-
Bra038612	Bra038612.1	AT5G63160	BT1	BT1 (BTB AND TAZ DOMAIN PROTEIN 1);protein binding / transcription regulator	-2.13242	8.2617	6645.3	0	0	8.98157	8.94095	8.92389	6.84324	6.8398	6.75425	13592	9913	9712	2445	3300	2428	Bra038612	1	-	-	-	-	-	-
Bra038734	Bra038734.1	AT3G12580	HSP70	HSP70 (heat shock protein 70);ATP binding	-2.83406	6.69862	7554.74	0	0	7.52474	7.5347	7.5671	4.68939	4.76789	4.65713	4950	3739	3791	548	783	566	Bra038734	1	-	-	-	-	-	-
Bra038785	Bra038785.1	AT4G21120	AAT1,CAT1	AAT1 (AMINO ACID TRANSPORTER 1);L-glutamate transmembrane transporter/ L-lysine transmembrane transporter/ arginine transmembrane transporter/ cationic amino acid transmembrane transporter	2.89067	4.77196	2358.03	0	0	2.69637	2.60497	2.70839	5.53174	5.58559	5.51448	172	121	129	984	1382	1027	Bra038785	1	-	-	-	-	-	-
Bra038832	Bra038832.1	AT2G18915	LKP2,ADO2	LKP2 (LOV KELCH PROTEIN 2);protein binding / ubiquitin-protein ligase	3.73241	4.51811	2247.56	0	0	1.71536	1.56604	1.80154	5.3005	5.44219	5.41884	86	58	68	838	1251	961	Bra038832	1	-	-	-	-	Flower genes	-
Bra038958	Bra038958.1	AT5G37340	-	zinc finger (ZPR1-type) family protein	-2.06617	4.78824	1543.07	0	0	5.48125	5.49013	5.56792	3.51035	3.4148	3.44379	1199	905	947	241	305	243	Bra038958	1	-	-	-	-	-	-
Bra039012	Bra039012.1	AT2G19710	-	unknown protein	-2.95834	5.92123	4568.95	0	0	6.75036	6.70639	6.77659	3.91221	3.6759	3.81103	2893	2105	2191	319	366	314	Bra039012	1	-	-	-	-	-	-
Bra039021	Bra039021.1	AT2G19800	MIOX2	MIOX2 (MYO-INOSITOL OXYGENASE 2);inositol oxygenase	-2.35214	5.769	3051.5	0	0	6.49362	6.49669	6.55515	4.10944	4.26805	4.10721	2421	1820	1879	366	553	386	Bra039021	1	-	-	-	-	-	-
Bra039058	Bra039058.1	AT3G28340	GATL10	GATL10 (Galacturonosyltransferase-like 10);polygalacturonate 4-alpha-galacturonosyltransferase/ transferase,transferring hexosyl groups	-2.34218	5.97311	3727.18	0	0	6.76079	6.76477	6.70233	4.45639	4.34147	4.43809	2914	2192	2081	466	582	486	Bra039058	1	-	-	-	-	-	-
Bra039070	Bra039070.1	AT3G27690	LHCB2.4,LHCB2.3,LHCB2	LHCB2.3;chlorophyll binding	-3.73813	11.2971	1.93034e+06	0	0	12.2044	12.1986	12.1894	8.44624	8.47176	8.45846	126912	94827	93412	7431	10233	7916	Bra039070	1	-	-	-	-	-	-
Bra039099	Bra039099.1	AT3G26980	MUB4	MUB4 (MEMBRANE-ANCHORED UBIQUITIN-FOLD PROTEIN 4 PRECURSOR)	-4.21438	6.16338	8316.13	0	0	7.11671	7.06473	7.10472	2.80407	3.04211	2.81072	3730	2699	2751	147	235	156	Bra039099	1	-	-	-	-	-	-
Bra039217	Bra039217.1	AT2G23810	TET8	TET8 (TETRASPANIN8)	-3.49345	7.87561	21850	0	0	8.7709	8.78417	8.78214	5.2745	5.28679	5.30186	11745	8892	8803	823	1123	886	Bra039217	1	-	-	-	-	-	-
Bra039434	Bra039434.1	AT3G05490	RALFL22	RALFL22 (ralf-like 22);signal transducer	-3.27438	5.1262	3868.32	0	0	6.01681	6.01624	6.04519	2.80407	2.75392	2.74532	1739	1304	1319	147	192	149	Bra039434	1	-	-	-	-	-	-
Bra039945	Bra039945.1	AT2G47130	-	short-chain dehydrogenase/reductase (SDR) family protein	-2.14702	6.12341	4042.65	0	0	6.86571	6.84409	6.86402	4.71797	4.74195	4.67731	3134	2316	2328	559	769	574	Bra039945	1	-	-	-	-	-	-
Bra039974	Bra039974.1	AT2G30670	-	tropinone reductase,putative / tropine dehydrogenase,putative	3.56711	3.90331	1489.12	0	0	1.1889	1.38622	1.06067	4.73586	4.79878	4.65713	59	51	40	566	800	566	Bra039974	1	-	-	-	-	-	-
Bra040061	Bra040061.1	AT3G08870	-	lectin protein kinase,putative	-2.66255	4.38963	1783.18	0	0	5.18942	5.23304	5.23213	2.53877	2.47668	2.70657	979	757	750	122	158	145	Bra040061	1	-	-	-	-	-	-
Bra040169	Bra040169.1	AT4G17615	CBL1,ATCBL1,SCABP5	CBL1 (CALCINEURIN B-LIKE PROTEIN 1);calcium ion binding	-4.44398	3.91732	2157.49	0	0	4.85691	4.88169	4.97205	0.532821	0.453379	0.63408	777	593	626	29	37	33	Bra040169	1	-	-	-	-	-	-
Bra040373	Bra040373.1	AT3G07350	-	unknown protein	-2.69218	4.56542	2046	0	0	5.41741	5.39646	5.36584	2.66155	2.776	2.69671	1147	848	823	133	195	144	Bra040373	1	-	-	-	-	-	-
Bra040374	Bra040374.1	AT3G07360	PUB9,ATPUB9	PUB9 (PLANT U-BOX 9)	-3.40171	5.09501	3955.64	0	0	6.01847	5.99509	6.00195	2.62908	2.64613	2.58365	1741	1285	1280	130	178	133	Bra040374	1	-	-	-	-	-	-
Bra040610	Bra040610.1	AT3G02910	-	FUNCTIONS IN: molecular_function unknown;INVOLVED IN: biological_process unknown;LOCATED IN: cellular_component unknown;EXPRESSED IN: 23 plant structures;EXPRESSED DURING: 15 growth stages;CONTAINS InterPro DOMAIN/s: Butirosin biosynthesis,BtrG-like (InterPro:IPR013024),AIG2-like (InterPro:IPR009288);BEST Arabidopsis thaliana protein match is: unknown protein (TAIR:AT5G46720.1);Has 210 Blast hits…	2.81166	4.69879	1987.73	0	0	2.71283	2.60497	2.6749	5.53028	5.45251	5.41734	174	121	126	983	1260	960	Bra040610	1	-	-	-	-	-	-
Bra015415	Bra015415.1	AT2G32270	ZIP3	ZIP3;zinc ion transmembrane transporter	4.38313	3.50051	1413.36	0	9.43261e-308	0.0740859	-0.554863	0.417809	4.36406	4.28355	4.38693	26	12	25	437	559	469	Bra015415	1	-	-	-	-	-	-
Bra003981	Bra003981.1	AT1G69760	-	unknown protein	3.0947	3.89109	1412.82	0	1.23657e-307	1.64849	1.72592	1.47815	4.67885	4.72123	4.64437	82	65	54	544	758	561	Bra003981	1	-	-	-	-	-	-
Bra019246	Bra019246.1	AT4G24120	YSL1,ATYSL1	YSL1 (YELLOW STRIPE LIKE 1);oligopeptide transporter	4.33415	3.60543	1406.56	7.87319e-308	2.81299e-306	-0.40504	0.351125	0.417809	4.40937	4.44158	4.35909	18	24	25	451	624	460	Bra019246	1	-	-	-	-	-	-
Bra025520	Bra025520.1	AT5G41100	-	FUNCTIONS IN: molecular_function unknown;INVOLVED IN: biological_process unknown;LOCATED IN: plasma membrane;EXPRESSED IN: 23 plant structures;EXPRESSED DURING: 13 growth stages;BEST Arabidopsis thaliana protein match is: hydroxyproline-rich glycoprotein family protein (TAIR:AT3G26910.2);Has 1257 Blast hits to 957 proteins in 161 species: Archae - 2;Bacteria - 67;Metazoa - 448;Fungi - 227;Plants …	-2.17182	4.51183	1375.67	4.06085e-301	1.4234e-299	5.21131	5.24441	5.2512	2.98597	3.02377	3.22819	994	763	760	167	232	209	Bra025520	1	-	-	-	-	-	-
Bra021734	Bra021734.1	AT2G31380	STH	STH;protein domain specific binding / transcription factor/ zinc ion binding	-5.50981	3.18026	1366.17	4.72974e-299	1.64933e-297	4.10045	4.13211	4.12813	-2.47601	-0.897551	-0.915531	459	352	348	2	13	10	Bra021734	1	-	-	-	-	-	-
Bra021385	Bra021385.1	AT3G02910	-	FUNCTIONS IN: molecular_function unknown;INVOLVED IN: biological_process unknown;LOCATED IN: cellular_component unknown;EXPRESSED IN: 23 plant structures;EXPRESSED DURING: 15 growth stages;CONTAINS InterPro DOMAIN/s: Butirosin biosynthesis,BtrG-like (InterPro:IPR013024),AIG2-like (InterPro:IPR009288);BEST Arabidopsis thaliana protein match is: unknown protein (TAIR:AT5G46720.1);Has 210 Blast hits…	2.35383	4.40408	1365.32	7.20387e-299	2.50565e-297	2.61989	2.82277	2.89452	5.094	5.07747	5.15848	163	141	147	726	971	802	Bra021385	1	-	-	-	-	-	-
Bra033998	Bra033998.1	AT1G67480	-	kelch repeat-containing F-box family protein	-2.01302	4.86318	1364.7	9.85101e-299	3.42346e-297	5.60765	5.59446	5.50894	3.58559	3.45642	3.68214	1309	973	909	254	314	287	Bra033998	1	-	-	-	-	-	-
Bra011590	Bra011590.1	AT4G35180	LHT7	LHT7 (Lys/His transporter 7);amino acid transmembrane transporter	3.01511	3.96512	1355.71	8.82693e-297	3.03645e-295	1.89918	1.41332	1.73808	4.7384	4.71362	4.70951	98	52	65	567	754	587	Bra011590	1	-	-	-	-	-	-
Bra027618	Bra027618.1	AT1G63090	AtPP2-A11	AtPP2-A11 (Phloem protein 2-A11);carbohydrate binding	-2.48286	4.13258	1351.04	9.14529e-296	3.13009e-294	4.90067	4.93175	4.96975	2.36568	2.58072	2.40156	801	614	625	108	170	117	Bra027618	1	-	-	-	-	-	-
Bra026864	Bra026864.1	AT1G14040	-	LOCATED IN: integral to membrane;EXPRESSED IN: 21 plant structures;EXPRESSED DURING: 12 growth stages;CONTAINS InterPro DOMAIN/s: SPX,N-terminal (InterPro:IPR004331),EXS,C-terminal (InterPro:IPR004342);BEST Arabidopsis thaliana protein match is: unknown protein (TAIR:AT2G03240.1);Has 732 Blast hits to 696 proteins in 144 species: Archae - 0;Bacteria - 0;Metazoa - 238;Fungi - 246;Plants - 151;Viru…	3.7146	3.78067	1350.8	1.03432e-295	3.5371e-294	0.845101	1.30172	0.665301	4.63593	4.50687	4.57346	46	48	30	528	653	534	Bra026864	1	-	-	-	-	-	-
Bra011208	Bra011208.1	AT4G30650	-	hydrophobic protein,putative / low temperature and salt responsive protein,putative	2.22825	4.59099	1350.45	1.23257e-295	4.21155e-294	3.15961	3.02958	2.94222	5.21194	5.31723	5.28223	238	163	152	788	1147	874	Bra011208	1	-	-	-	-	-	-
Bra003850	Bra003850.1	AT1G73260	-	trypsin and protease inhibitor family protein / Kunitz family protein	2.82198	4.12447	1350.23	1.37243e-295	4.6855e-294	2.0622	2.05331	2.1654	4.81014	4.94403	4.89542	110	82	88	596	885	668	Bra003850	1	-	-	-	-	-	-
Bra036140	Bra036140.1	AT5G49480	ATCP1	ATCP1 (Ca2+-binding protein 1);calcium ion binding	-2.21262	4.56206	1328.86	6.06015e-291	2.04323e-289	5.35586	5.38795	5.2436	3.17023	3.15876	3.06928	1099	843	756	190	255	187	Bra036140	1	-	-	-	-	-	-
Bra006304	Bra006304.1	AT5G15500	-	ankyrin repeat family protein	2.66846	4.10745	1326.12	2.38035e-290	7.99904e-289	2.18525	2.27636	2.1654	4.77842	4.8809	4.89111	120	96	88	583	847	666	Bra006304	1	-	-	-	-	-	-
Bra011686	Bra011686.1	AT4G36500	-	unknown protein	-3.06738	3.69395	1324.88	4.42059e-290	1.48184e-288	4.60248	4.53205	4.56901	1.48935	1.46292	1.67614	651	465	473	58	77	70	Bra011686	1	-	-	-	-	-	-
Bra017975	Bra017975.1	AT3G49570	LSU3	LSU3 (RESPONSE TO LOW SULFUR 3)	-3.68817	3.38791	1319.93	5.26926e-289	1.76343e-287	4.35496	4.35116	4.25066	0.865655	0.48947	0.790481	548	410	379	37	38	37	Bra017975	1	-	-	-	-	-	-
Bra031470	Bra031470.1	AT1G60960	IRT3	IRT3;cation transmembrane transporter/ metal ion transmembrane transporter	3.78634	3.98675	1319.8	5.61892e-289	1.8789e-287	1.23521	1.0487	1.22398	4.90357	5.05657	4.81118	61	40	45	636	957	630	Bra031470	1	-	-	-	-	-	-
Bra014327	Bra014327.1	AT2G01300	-	unknown protein	-2.31833	4.23356	1309.63	9.14631e-287	3.04839e-285	5.03763	4.98466	4.97893	2.67221	2.81918	2.56211	881	637	629	134	201	131	Bra014327	1	-	-	-	-	-	-
Bra011328	Bra011328.1	AT4G32190	-	centromeric protein-related	-2.47712	4.10963	1307.86	2.21354e-286	7.37151e-285	4.85135	4.9341	4.95122	2.41729	2.42171	2.5068	774	615	617	112	152	126	Bra011328	1	-	-	-	-	-	-
Bra026606	Bra026606.1	AT2G02240	MEE66	MEE66 (maternal effect embryo arrest 66)	-4.43284	3.56093	1302.01	4.14012e-285	1.36977e-283	4.56444	4.37548	4.45852	0.6235	-0.178453	0.14755	634	417	438	31	23	23	Bra026606	1	-	-	-	-	-	-
Bra000441	Bra000441.1	AT2G47130	-	short-chain dehydrogenase/reductase (SDR) family protein	5.50375	3.12791	1301.49	5.35594e-285	1.77059e-283	-0.910214	-1.05157	-2.08382	4.08172	3.99117	3.98301	12	8	3	359	456	354	Bra000441	1	-	-	-	-	-	-
Bra004022	Bra004022.1	AT1G68690	-	ATP binding / protein kinase/ protein serine/threonine kinase	-2.12477	4.48272	1297.27	4.42904e-284	1.45707e-282	5.2142	5.16092	5.27561	3.01139	3.16993	3.09951	996	720	773	170	257	191	Bra004022	1	-	-	-	-	-	-
Bra038032	Bra038032.1	AT1G55960	-	FUNCTIONS IN: molecular_function unknown;INVOLVED IN: biological_process unknown;EXPRESSED IN: 24 plant structures;EXPRESSED DURING: 15 growth stages;CONTAINS InterPro DOMAIN/s: Lipid-binding START (InterPro:IPR002913);BEST Arabidopsis thaliana protein match is: unknown protein (TAIR:AT3G13062.2);Has 177 Blast hits to 177 proteins in 41 species: Archae - 0;Bacteria - 0;Metazoa - 79;Fungi - 0;Plan…	-2.27729	4.60402	1290.77	1.14498e-282	3.75766e-281	5.38825	5.26873	5.31962	3.02808	2.97368	3.24181	1124	776	797	172	224	211	Bra038032	1	-	-	-	-	-	-
Bra004261	Bra004261.1	AT1G67810	SUFE2	SUFE2 (SULFUR E 2);enzyme activator	4.23583	3.31291	1289.45	2.21846e-282	7.26894e-281	-0.145678	-0.106919	0.417809	4.22618	4.13766	4.19382	22	17	25	397	505	410	Bra004261	1	-	-	-	-	-	-
Bra037647	Bra037647.1	AT3G60120	BGLU27	BGLU27 (BETA GLUCOSIDASE 27);catalytic/ cation binding / hydrolase,hydrolyzing O-glycosyl compounds	2.45259	4.54849	1289.32	2.37174e-282	7.76491e-281	2.86048	2.93923	2.82496	5.24088	5.30462	5.42183	193	153	140	804	1137	963	Bra037647	1	-	-	-	-	-	-
Bra000165	Bra000165.1	AT2G40080	ELF4	ELF4 (EARLY FLOWERING 4)	3.64179	3.69229	1261.1	3.21903e-276	1.0405e-274	0.814924	1.2425	0.836652	4.51085	4.49582	4.65458	45	46	34	484	648	565	Bra000165	1	-	-	-	-	-	-
Bra027323	Bra027323.1	AT3G14620	CYP72A8	CYP72A8;electron carrier/ heme binding / iron ion binding / monooxygenase/ oxygen binding	4.26212	3.26863	1260.99	3.40147e-276	1.09859e-274	0.0740859	0.107389	-0.258608	4.10551	4.1852	4.11463	26	20	15	365	522	388	Bra027323	1	-	-	-	-	-	-
Bra024087	Bra024087.1	AT1G65310	ATXTH17,XTH17	XTH17 (XYLOGLUCAN ENDOTRANSGLUCOSYLASE/HYDROLASE 17);hydrolase,acting on glycosyl bonds / hydrolase,hydrolyzing O-glycosyl compounds / xyloglucan:xyloglucosyl transferase	-2.55394	4.39958	1259.51	7.12838e-276	2.29865e-274	5.32274	5.12653	5.25875	2.63999	2.76132	2.72607	1074	703	764	131	193	147	Bra024087	1	-	-	-	-	-	-
Bra024038	Bra024038.1	AT4G30850	HHP2	HHP2 (HEPTAHELICAL TRANSMEMBRANE PROTEIN2);receptor	-2.58845	4.17871	1254.89	7.17894e-275	2.30764e-273	5.06834	4.93877	4.94655	2.41729	2.38386	2.47256	900	617	615	112	148	123	Bra024038	1	-	-	-	-	-	-
Bra026170	Bra026170.1	AT1G15010	-	unknown protein	-5.13233	2.92346	1252.2	2.75629e-274	8.84598e-273	3.99337	3.9075	3.86156	-1.11622	-0.807219	-1.0418	426	301	289	8	14	9	Bra026170	1	-	-	-	-	-	-
Bra010785	Bra010785.1	AT1G30250	-	unknown protein	4.19878	3.25491	1233.49	3.21539e-270	1.02307e-268	0.124168	0.172291	-0.258608	4.19694	4.10022	4.08094	27	21	15	389	492	379	Bra010785	1	-	-	-	-	-	-
Bra012845	Bra012845.1	AT3G51660	-	macrophage migration inhibitory factor family protein / MIF family protein	3.32647	3.57336	1229.43	2.45326e-269	7.7814e-268	0.987186	1.21195	1.16086	4.444	4.39952	4.31469	51	45	43	462	606	446	Bra012845	1	-	-	-	-	-	-
Bra007507	Bra007507.1	AT3G60120	BGLU27	BGLU27 (BETA GLUCOSIDASE 27);catalytic/ cation binding / hydrolase,hydrolyzing O-glycosyl compounds	4.38833	3.44119	1229.11	2.87086e-269	9.09889e-268	0.0740859	-0.106919	0.245978	4.39013	4.42071	4.21468	26	17	22	445	615	416	Bra007507	1	-	-	-	-	-	-
Bra007271	Bra007271.1	AT3G56820	-	unknown protein	2.97258	4.01283	1225.45	1.79922e-268	5.6759e-267	1.57836	1.90844	1.99491	4.67885	4.81309	4.79741	78	74	78	544	808	624	Bra007271	1	-	-	-	-	-	-
Bra005709	Bra005709.1	AT5G02120	OHP	OHP (ONE HELIX PROTEIN)	-2.06584	4.96338	1222.38	8.36156e-268	2.6337e-266	5.66376	5.60772	5.54955	3.51035	3.48352	3.7787	1361	982	935	241	320	307	Bra005709	1	-	-	-	-	-	-
Bra020592	Bra020592.1	AT5G27360	SFP2	SFP2;carbohydrate transmembrane transporter/ sugar:hydrogen symporter	-2.01655	4.64417	1220.19	2.49692e-267	7.84043e-266	5.28195	5.27797	5.31601	3.1166	3.42881	3.26199	1044	781	795	183	308	214	Bra020592	1	-	-	-	-	-	-
Bra007983	Bra007983.1	AT1G71380	ATGH9B3,ATCEL3	ATCEL3 (ARABIDOPSIS THALIANA CELLULASE 3);catalytic/ hydrolase,hydrolyzing O-glycosyl compounds	2.59183	4.00293	1217.9	7.84467e-267	2.45757e-265	2.26555	2.03598	2.1654	4.69463	4.72312	4.80202	127	81	88	550	759	626	Bra007983	1	-	-	-	-	-	-
Bra036353	Bra036353.1	AT3G26000	-	F-box family protein	-2.07191	4.45921	1217.31	1.0539e-266	3.2991e-265	5.1355	5.24629	5.17936	3.15511	3.13047	3.0769	943	764	723	188	250	188	Bra036353	1	-	-	-	-	-	-
Bra009229	Bra009229.1	AT4G34710	ADC2,SPE2,ATADC2	ADC2 (ARGININE DECARBOXYLASE 2);arginine decarboxylase	-2.29491	4.51271	1203.61	1.00132e-263	3.10586e-262	5.30792	5.40324	5.21863	2.95138	3.00519	3.11439	1063	852	743	163	229	193	Bra009229	1	-	-	-	-	-	-
Bra009608	Bra009608.1	AT5G02180	-	amino acid transporter family protein	-2.3705	4.05722	1197.83	1.8072e-262	5.5842e-261	4.85135	4.83985	4.81435	2.40456	2.55541	2.46097	774	576	561	111	167	122	Bra009608	1	-	-	-	-	-	-
Bra016945	Bra016945.1	AT2G41250	-	haloacid dehalogenase-like hydrolase family protein	-2.65532	3.81967	1195.58	5.58293e-262	1.7225e-260	4.60909	4.66766	4.66597	2.12307	1.92494	2.01429	654	511	506	91	107	89	Bra016945	1	-	-	-	-	-	-
Bra019178	Bra019178.1	AT4G25290	-	DNA photolyase	-3.04078	3.56187	1195.34	6.29153e-262	1.93965e-260	4.40139	4.47209	4.44533	1.36345	1.49877	1.41283	566	446	434	53	79	58	Bra019178	1	-	-	-	-	-	-
Bra021558	Bra021558.1	AT3G14440	NCED3,ATNCED3,STO1,SIS7	NCED3 (NINE-CIS-EPOXYCAROTENOID DIOXYGENASE 3);9-cis-epoxycarotenoid dioxygenase	-3.23576	3.54278	1194.35	1.03271e-261	3.17899e-260	4.37836	4.41624	4.42197	1.13591	1.46292	0.964792	557	429	427	45	77	42	Bra021558	1	-	-	-	-	-	-
Bra017112	Bra017112.1	AT2G38540	LP1,LTP1,ATLTP1	LP1;calmodulin binding	3.52516	4.03679	1193.85	1.32404e-261	4.07269e-260	1.014	1.56604	1.47815	4.7858	4.97777	4.81801	52	58	54	586	906	633	Bra017112	1	-	-	-	-	-	-
Bra034424	Bra034424.1	AT1G35210	-	unknown protein	-2.79607	3.71286	1191.29	4.75844e-261	1.45927e-259	4.60027	4.49447	4.55986	1.83125	1.77217	1.77309	650	453	470	74	96	75	Bra034424	1	-	-	-	-	-	-
Bra009663	Bra009663.1	AT5G66070	-	zinc finger (C3HC4-type RING finger) family protein	-3.44863	3.55349	1185	1.10782e-259	3.38205e-258	4.3912	4.39601	4.36359	1.4403	0.807999	0.931574	562	423	410	56	48	41	Bra009663	1	-	-	-	-	-	-
Bra017035	Bra017035.1	AT2G40080	ELF4	ELF4 (EARLY FLOWERING 4)	6.91239	2.80731	1182.59	3.70549e-259	1.12871e-257	-2.64153	-2.43419	-2.08382	3.74556	3.73346	3.72154	2	2	3	284	381	295	Bra017035	1	-	-	-	-	-	-
Bra027654	Bra027654.1	AT1G63670	-	unknown protein	2.39344	4.31602	1177.16	5.61655e-258	1.70444e-256	2.62859	2.71797	2.28863	5.01455	4.92933	4.98517	164	131	96	687	876	711	Bra027654	1	-	-	-	-	-	-
Bra000889	Bra000889.1	AT2G46450	ATCNGC12,CNGC12	ATCNGC12;cation channel/ cyclic nucleotide binding / ion channel	5.73183	2.87773	1158.43	6.59399e-254	1.96732e-252	-2.09155	-1.20798	-1.37374	3.77553	3.81749	3.76933	4	7	6	290	404	305	Bra000889	1	-	-	-	-	-	-
Bra006288	Bra006288.1	AT5G15190	-	unknown protein	-3.90843	3.11094	1152.45	1.31956e-252	3.91969e-251	4.10669	4.03947	4.02113	-0.103822	0.339352	0.411228	461	330	323	18	34	28	Bra006288	1	-	-	-	-	-	-
Bra014860	Bra014860.1	AT3G53830	-	regulator of chromosome condensation (RCC1) family protein / UVB-resistance protein-related	-2.4417	4.13357	1150.66	3.22058e-252	9.55258e-251	4.85135	4.9756	4.96745	2.55037	2.40291	2.57292	774	633	624	123	150	132	Bra014860	1	-	-	-	-	-	-
Bra037955	Bra037955.1	AT1G54030	-	GDSL-motif lipase,putative	2.52445	3.96937	1146.87	2.14515e-251	6.34426e-250	2.27666	2.27636	1.9767	4.67621	4.70213	4.70951	128	96	77	543	748	587	Bra037955	1	-	-	-	-	-	-
Bra038411	Bra038411.1	AT1G31130	-	unknown protein	-2.81661	3.62751	1133.63	1.62427e-248	4.74513e-247	4.51133	4.44935	4.44864	1.46503	1.68148	1.88143	611	439	435	57	90	81	Bra038411	1	-	-	-	-	-	-
Bra010441	Bra010441.1	AT4G26080	ABI1	ABI1 (ABA INSENSITIVE 1);calcium ion binding / protein serine/threonine phosphatase	2.06747	4.43549	1128.96	1.67932e-247	4.88143e-246	3.01447	3.01195	3.08508	5.02082	5.12843	5.11105	215	161	168	690	1006	776	Bra010441	1	-	-	-	-	-	-
Bra036492	Bra036492.1	AT2G20670	-	unknown protein	-2.0085	4.32917	1117.69	4.72182e-245	1.3599e-243	5.0096	5.03352	5.08475	3.13983	2.99267	3.00686	864	659	677	186	227	179	Bra036492	1	-	-	-	-	-	-
Bra018953	Bra018953.1	AT1G52200	-	unknown protein	2.25295	4.15071	1105.62	1.98535e-242	5.6618e-241	2.56655	2.65124	2.59358	4.82215	4.85865	4.82707	157	125	119	601	834	637	Bra018953	1	-	-	-	-	-	-
Bra032370	Bra032370.1	AT1G30250	-	unknown protein	4.56806	3.09507	1104.89	2.85667e-242	8.13522e-241	-0.206279	-0.781944	-0.442432	3.91221	3.94318	4.08094	21	10	13	319	441	379	Bra032370	1	-	-	-	-	-	-
Bra014666	Bra014666.1	AT3G56880	-	VQ motif-containing protein	-2.45982	4.10374	1098.68	6.40927e-241	1.81507e-239	4.92029	4.98917	4.80921	2.56188	2.43102	2.42562	812	639	559	124	153	119	Bra014666	1	-	-	-	-	-	-
Bra024588	Bra024588.1	AT1G23330	-	unknown protein	-3.0051	3.53857	1091.63	2.18074e-239	6.14153e-238	4.47319	4.3994	4.32812	1.33689	1.38842	1.5936	595	424	400	52	73	66	Bra024588	1	-	-	-	-	-	-
Bra033570	Bra033570.1	AT4G38580	ATFP6,HIPP26	ATFP6 (FARNESYLATED PROTEIN 6);metal ion binding	-2.80361	3.57805	1088.56	1.01015e-238	2.84287e-237	4.45374	4.41624	4.38792	1.51326	1.81547	1.55048	587	429	417	59	99	64	Bra033570	1	-	-	-	-	-	-
Bra018040	Bra018040.1	AT3G48720	-	transferase family protein	2.06048	4.46874	1087.79	1.49167e-238	4.19513e-237	3.14149	2.93923	3.11036	5.04972	5.16515	5.14042	235	153	171	704	1032	792	Bra018040	1	-	-	-	-	-	-
Bra030157	Bra030157.1	AT1G29690	CAD1	CAD1 (constitutively activated cell death 1)	-2.05333	4.73627	1087	2.20859e-238	6.20279e-237	5.5343	5.39985	5.42076	3.55135	3.29245	3.42004	1244	850	855	248	280	239	Bra030157	1	-	-	-	-	-	-
Bra025735	Bra025735.1	AT1G19370	-	unknown protein	2.0544	4.32656	1086.06	3.5314e-238	9.8906e-237	2.84563	3.02079	2.97011	4.92824	4.98569	5.02115	191	162	155	647	911	729	Bra025735	1	-	-	-	-	-	-
Bra024660	Bra024660.1	AT1G27120	-	galactosyltransferase family protein	-2.64622	3.83746	1080.87	4.73961e-237	1.3238e-235	4.70477	4.73902	4.56901	2.12307	2.01436	2.04567	699	537	473	91	114	91	Bra024660	1	-	-	-	-	-	-
Bra036303	Bra036303.1	AT4G01950	ATGPAT3,GPAT3	GPAT3 (GLYCEROL-3-PHOSPHATE ACYLTRANSFERASE 3);acyltransferase	-2.0951	4.34447	1070.69	7.73791e-235	2.14359e-233	5.03436	5.13469	5.03501	2.86109	3.11323	2.92484	879	707	654	153	247	169	Bra036303	1	-	-	-	-	-	-
Bra036060	Bra036060.1	AT3G50240	KICP-02	KICP-02;ATP binding / microtubule motor	-2.0666	4.352	1067.36	4.10035e-234	1.13436e-232	5.03763	5.02695	4.99712	3.01976	2.776	3.0769	881	656	637	171	195	188	Bra036060	1	-	-	-	-	-	-
Bra013423	Bra013423.1	AT4G19700	RING	RING;protein binding / zinc ion binding	4.3447	3.0068	1066.16	7.48509e-234	2.06933e-232	-0.40504	-0.106919	-0.442432	3.88498	3.84561	3.92089	18	17	13	313	412	339	Bra013423	1	-	-	-	-	-	-
Bra023450	Bra023450.1	AT5G14200	-	3-isopropylmalate dehydrogenase,chloroplast,putative	2.70823	3.71121	1054.18	3.00196e-231	8.24882e-230	1.71536	1.96449	1.67171	4.42521	4.47347	4.48177	86	77	62	456	638	501	Bra023450	1	-	-	Glucosinolate genes	-	-	-
Bra031708	Bra031708.1	AT1G10360	ATGSTU18,GST29	ATGSTU18 (GLUTATHIONE S-TRANSFERASE TAU 18);glutathione transferase	-2.40052	3.84016	1049.59	2.98788e-230	8.19351e-229	4.67567	4.58366	4.5961	2.22795	2.32516	2.15044	685	482	482	98	142	98	Bra031708	1	-	-	-	-	-	-
Bra007225	Bra007225.1	AT3G56200	-	amino acid transporter family protein	-2.16144	4.32461	1045.29	2.57072e-229	7.02588e-228	5.13703	5.0892	4.98122	2.86109	2.90853	3.01481	944	685	630	153	214	180	Bra007225	1	-	-	-	-	-	-
Bra028477	Bra028477.1	AT5G40780	LTH1	LHT1;amino acid transmembrane transporter	3.49694	3.33298	1042.89	8.53464e-229	2.32631e-227	0.932019	0.698255	0.245978	4.10551	4.16303	4.11833	49	31	22	365	514	389	Bra028477	1	-	-	-	-	-	-
Bra023510	Bra023510.1	AT5G15190	-	unknown protein	-5.80873	2.5597	1038.31	8.45599e-228	2.30332e-226	3.62289	3.58882	3.50919	-2.14135	-1.32896	-2.1899	329	241	226	3	9	3	Bra023510	1	-	-	-	-	-	-
Bra025340	Bra025340.1	AT3G28510	-	AAA-type ATPase family protein	3.22921	3.50446	1038.29	8.54467e-228	2.32592e-226	1.21224	0.977849	1.16086	4.39978	4.23919	4.30823	60	38	43	448	542	444	Bra025340	1	-	-	-	-	-	-
Bra026273	Bra026273.1	AT4G28240	-	wound-responsive protein-related	3.34248	3.41083	1034.32	6.21671e-227	1.68884e-225	0.583915	1.21195	0.953006	4.18583	4.22321	4.15477	38	45	37	386	536	399	Bra026273	1	-	-	-	-	-	-
Bra009364	Bra009364.1	AT5G08720	-	FUNCTIONS IN: molecular_function unknown;INVOLVED IN: biological_process unknown;LOCATED IN: mitochondrion;CONTAINS InterPro DOMAIN/s: Streptomyces cyclase/dehydrase (InterPro:IPR005031);BEST Arabidopsis thaliana protein match is: unknown protein (TAIR:AT4G01650.2);Has 578 Blast hits to 324 proteins in 67 species: Archae - 1;Bacteria - 248;Metazoa - 1;Fungi - 0;Plants - 59;Viruses - 0;Other Eukar…	-2.2225	4.23864	1032.8	1.33304e-226	3.61654e-225	4.97249	5.00707	5.13488	2.79434	2.86111	2.78305	842	647	701	146	207	153	Bra009364	1	-	-	-	-	-	-
Bra029355	Bra029355.1	AT5G23010	MAM1,IMS3	MAM1 (METHYLTHIOALKYLMALATE SYNTHASE 1);2-isopropylmalate synthase/ methylthioalkylmalate synthase	2.14758	4.20271	1031.45	2.62499e-226	7.10737e-225	2.83815	2.52025	2.7303	4.85761	4.83605	4.88244	190	114	131	616	821	662	Bra029355	1	-	-	Glucosinolate genes	-	-	-
Bra011687	Bra011687.1	AT4G36500	-	unknown protein	-3.10854	3.30214	1025.24	5.8669e-225	1.5801e-223	4.23758	4.12393	4.1688	1.07295	1.22677	1.02902	505	350	358	43	65	44	Bra011687	1	-	-	-	-	-	-
Bra020409	Bra020409.1	AT5G57830	-	unknown protein	10.9702	2.50522	1022.54	2.26728e-224	6.08621e-223	-3.54139	-3.54139	-3.54139	3.41836	3.45642	3.43789	0	0	0	226	314	242	Bra020409	1	-	-	-	-	-	-
Bra001003	Bra001003.1	AT3G01550	ATPPT2,PPT2	PPT2 (PHOSPHOENOLPYRUVATE (PEP)/PHOSPHATE TRANSLOCATOR 2);antiporter/ triose-phosphate transmembrane transporter	-2.10313	4.30274	1019.39	1.0932e-223	2.92298e-222	5.05226	5.0871	4.94889	2.82333	3.05421	2.89929	890	684	616	149	237	166	Bra001003	1	-	-	-	-	-	-
Bra006401	Bra006401.1	AT5G17350	-	unknown protein	-3.94869	3.37356	1012.36	3.69175e-222	9.81933e-221	4.56444	4.27932	4.38792	0.332335	0.688888	0.504538	634	390	417	25	44	30	Bra006401	1	-	-	-	-	-	-
Bra029545	Bra029545.1	AT4G04990	-	unknown protein	4.18084	3.45332	1011.64	5.29257e-222	1.4068e-220	0.433144	-0.186066	0.470821	4.22255	4.37803	4.52417	34	16	26	396	597	516	Bra029545	1	-	-	-	-	-	-
Bra016230	Bra016230.1	AT1G70170	MMP	MMP (MATRIX METALLOPROTEINASE);metalloendopeptidase/ metallopeptidase	-3.32419	3.16853	1011.3	6.29384e-222	1.67185e-220	4.03651	4.09911	4.09052	0.532821	0.944265	0.862752	439	344	339	29	53	39	Bra016230	1	-	-	-	-	-	-
Bra029393	Bra029393.1	AT5G24150	SQP1,SQE5	SQP1;squalene monooxygenase	6.42418	2.67279	1007	5.40492e-221	1.43199e-219	-2.34049	-1.81519	-2.42749	3.52218	3.67981	3.5461	3	4	2	243	367	261	Bra029393	1	-	-	-	-	-	-
Bra022034	Bra022034.1	AT4G08450	-	disease resistance protein (TIR-NBS-LRR class),putative	-2.61272	3.98069	999.629	2.16262e-219	5.67791e-218	4.83264	4.70103	4.9182	2.25657	2.32516	2.09151	764	523	603	100	142	94	Bra022034	1	-	-	-	-	-	Resistence gene
Bra007234	Bra007234.1	AT3G56290	-	unknown protein	-3.51324	3.76242	996.119	1.25297e-218	3.27696e-217	4.45619	4.6161	4.63727	1.1664	0.48947	1.33875	588	493	496	46	38	55	Bra007234	1	-	-	-	-	-	-
Bra019324	Bra019324.1	AT4G23270	-	protein kinase family protein	2.89443	3.50706	995.953	1.36104e-218	3.55503e-217	1.48562	1.18075	1.55381	4.32744	4.26545	4.24879	73	44	57	426	552	426	Bra019324	1	-	-	-	-	-	-
Bra026133	Bra026133.1	AT1G15410	-	aspartate-glutamate racemase family	2.21922	4.03073	994.2	3.27251e-218	8.53685e-217	2.44374	2.62829	2.46883	4.7384	4.67692	4.73139	144	123	109	567	735	596	Bra026133	1	-	-	-	-	-	-
Bra015881	Bra015881.1	AT1G74940	-	senescence-associated protein-related	2.85297	3.52674	991.599	1.20344e-217	3.13332e-216	1.57836	1.4917	1.31377	4.27595	4.30396	4.29849	78	55	48	411	567	441	Bra015881	1	-	-	-	-	-	-
Bra008032	Bra008032.1	AT1G72430	-	auxin-responsive protein-related	-2.4744	3.76375	981.57	1.82105e-215	4.70525e-214	4.61348	4.56263	4.48453	2.12307	2.24297	1.89872	656	475	446	91	134	82	Bra008032	1	-	Auxin genes	-	-	-	-
Bra022794	Bra022794.1	AT2G30360	CIPK11,PKS5,SIP4,SNRK3.22	SIP4 (SOS3-INTERACTING PROTEIN 4);kinase/ protein kinase	-2.3242	3.81127	980.002	3.99084e-215	1.0292e-213	4.57348	4.60439	4.57204	2.21343	2.24297	2.37709	638	489	474	97	134	115	Bra022794	1	-	-	-	-	-	-
Bra038688	Bra038688.1	AT3G11930	-	universal stress protein (USP) family protein	2.19706	4.01957	972.047	2.13954e-213	5.48982e-212	2.61989	2.40345	2.4818	4.71797	4.72123	4.64693	163	105	110	559	758	562	Bra038688	1	-	-	-	-	-	-
Bra032613	Bra032613.1	AT1G02270	-	endonuclease/exonuclease/phosphatase family protein / calcium-binding EF hand family protein	-2.66138	3.51333	969.381	8.12482e-213	2.08211e-211	4.38351	4.31569	4.2991	1.6704	1.78675	1.63546	559	400	392	66	97	68	Bra032613	1	-	-	-	-	-	-
Bra009783	Bra009783.1	AT5G24660	LSU2	LSU2 (RESPONSE TO LOW SULFUR 2)	-2.4971	3.98836	969.359	8.21373e-213	2.10357e-211	4.8532	4.69276	4.75681	2.32572	2.42171	2.07639	775	520	539	105	152	93	Bra009783	1	-	-	-	-	-	-
Bra033482	Bra033482.1	AT4G14450	-	unknown protein	-4.43099	2.9294	965.455	5.79664e-212	1.47989e-210	3.81046	3.90272	4.03439	-0.0328451	-0.493655	-0.591991	375	300	326	19	18	13	Bra033482	1	-	-	-	-	-	-
Bra037493	Bra037493.1	AT5G39740	OLI7,RPL5B	60S ribosomal protein L5 (RPL5B)	-3.81635	3.11504	960.611	6.54764e-211	1.66327e-209	4.10669	4.06105	3.91514	-0.178473	0.559051	0.311463	461	335	300	17	40	26	Bra037493	1	-	-	-	-	-	-
Bra033549	Bra033549.1	AT4G16260	-	catalytic/ cation binding / hydrolase,hydrolyzing O-glycosyl compounds	3.14363	3.30183	953.773	2.00739e-209	5.04888e-208	1.21224	0.903337	0.795684	4.11726	4.04066	4.15116	60	36	33	368	472	398	Bra033549	1	-	-	-	-	-	-
Bra021740	Bra021740.1	AT2G31750	UGT74D1	UGT74D1 (UDP-glucosyl transferase 74D1);UDP-glycosyltransferase/ abscisic acid glucosyltransferase/ transferase,transferring glycosyl groups / transferase,transferring hexosyl groups	-2.16823	3.99341	943.269	3.85368e-207	9.60351e-206	4.68613	4.73634	4.79888	2.58463	2.44946	2.73573	690	536	555	126	155	148	Bra021740	1	-	-	-	-	-	-
Bra014461	Bra014461.1	AT2G45570	CYP76C2	CYP76C2;electron carrier/ heme binding / iron ion binding / monooxygenase/ oxygen binding	2.67773	3.55156	929.083	4.67334e-204	1.15262e-202	1.81019	1.41332	1.64888	4.33752	4.32158	4.22842	92	52	61	429	574	420	Bra014461	1	-	-	-	-	-	-
Bra002138	Bra002138.1	AT5G18150	-	unknown protein	-2.28447	3.76652	925.349	3.02885e-203	7.45219e-202	4.47802	4.57168	4.5568	2.36568	2.22167	2.22088	597	478	469	108	132	103	Bra002138	1	-	-	-	-	-	-
Bra003774	Bra003774.1	AT1G75030	ATLP-3	ATLP-3	3.27948	3.26021	917.196	1.79365e-201	4.37344e-200	1.04032	0.607297	0.795684	3.96952	4.07966	4.14393	53	29	33	332	485	396	Bra003774	1	-	-	-	-	-	-
Bra022587	Bra022587.1	AT5G52390	-	photoassimilate-responsive protein,putative	3.8623	3.04837	917.1	1.88196e-201	4.586e-200	0.172569	0.406128	-0.258608	3.78047	3.92023	3.97488	28	25	15	291	434	352	Bra022587	1	-	-	-	-	-	-
Bra026303	Bra026303.1	AT4G27860	-	integral membrane family protein	2.49078	3.67452	917.027	1.9513e-201	4.75214e-200	2.02314	1.78936	1.93957	4.42206	4.42304	4.33706	107	68	75	455	616	453	Bra026303	1	-	-	-	-	-	-
Bra008157	Bra008157.1	AT1G74590	ATGSTU10,GSTU10	GSTU10 (GLUTATHIONE S-TRANSFERASE TAU 10);glutathione transferase	4.16753	2.83943	916.84	2.14314e-201	5.21622e-200	-0.269539	-0.269808	-0.442432	3.6994	3.72213	3.68713	20	15	13	275	378	288	Bra008157	1	-	-	-	-	-	-
Bra030934	Bra030934.1	AT1G53470	MSL4	MSL4 (MECHANOSENSITIVE CHANNEL OF SMALL CONDUCTANCE-LIKE 4)	-3.98406	2.79571	910.796	4.41444e-200	1.06805e-198	3.6658	3.76748	3.83653	-0.178473	-0.122907	-0.0374006	339	273	284	17	24	20	Bra030934	1	-	-	-	-	-	-
Bra018942	Bra018942.1	AT1G52030	MBP2,MBP1.2,F-ATMBP	MBP2 (MYROSINASE-BINDING PROTEIN 2);sugar binding / thioglucosidase binding	3.0549	3.86967	907.283	2.56238e-199	6.17384e-198	1.46634	1.51691	2.0129	4.54605	4.5944	4.75532	72	56	79	496	694	606	Bra018942	1	-	-	-	-	-	-
Bra015514	Bra015514.1	AT1G06640	-	2-oxoglutarate-dependent dioxygenase,putative	4.39677	2.89592	903.978	1.3397e-198	3.22407e-197	-0.40504	-0.781944	-0.258608	3.64091	3.81038	3.85155	18	10	15	264	402	323	Bra015514	1	-	-	-	-	-	-
Bra018806	Bra018806.1	AT3G14690	CYP72A15	CYP72A15;electron carrier/ heme binding / iron ion binding / monooxygenase/ oxygen binding	2.89312	3.83544	900.977	6.0172e-198	1.44551e-196	1.81019	1.86983	1.71629	4.65487	4.79878	4.55449	92	72	64	535	800	527	Bra018806	1	-	-	-	-	-	-
Bra029936	Bra029936.1	AT3G49160	-	pyruvate kinase family protein	-2.0517	4.26392	895.985	7.32378e-197	1.74804e-195	5.07949	4.94342	4.94655	3.0609	2.94148	2.86451	907	619	615	176	219	162	Bra029936	1	-	-	-	-	-	-
Bra028485	Bra028485.1	AT5G41080	-	glycerophosphoryl diester phosphodiesterase family protein	-3.61621	2.86066	894.79	1.33154e-196	3.17253e-195	3.84447	3.69202	3.80591	0.0348034	0.453379	0.204282	384	259	278	20	37	24	Bra028485	1	-	-	-	-	-	-
Bra007177	Bra007177.1	AT3G55580	-	regulator of chromosome condensation (RCC1) family protein	-5.94674	2.38486	889.983	1.47714e-195	3.50304e-194	3.36621	3.52812	3.32711	-1.44439	-2.68725	-1.92362	275	231	199	6	2	4	Bra007177	1	-	-	-	-	-	-
Bra025481	Bra025481.1	AT2G38860	YLS5	YLS5	2.11567	4.36065	888.737	2.75535e-195	6.51534e-194	3.04078	2.79212	2.97011	5.12149	5.06706	4.93995	219	138	155	740	964	689	Bra025481	1	-	-	-	-	-	-
Bra023359	Bra023359.1	AT5G12010	-	unknown protein	3.04744	3.24844	885.744	1.23312e-194	2.90404e-193	0.959866	1.11623	1.06067	4.00368	4.06179	4.03085	50	42	40	340	479	366	Bra023359	1	-	-	-	-	-	-
Bra027317	Bra027317.1	AT3G14720	ATMPK19,MPK19	ATMPK19;MAP kinase	-2.39517	3.83159	885.22	1.60283e-194	3.77253e-193	4.55535	4.58068	4.47483	2.24233	1.87124	2.3011	630	481	443	99	103	109	Bra027317	1	-	-	-	-	-	-
Bra034762	Bra034762.1	AT3G12320	-	unknown protein	-4.9707	2.62799	881.451	1.05748e-193	2.48179e-192	3.73189	3.53431	3.57119	-0.976457	-0.807219	-1.69891	355	232	236	9	14	5	Bra034762	1	-	-	-	-	-	-
Bra031989	Bra031989.1	AT3G03480	CHAT	CHAT (acetyl CoA:(Z)-3-hexen-1-ol acetyltransferase);acetyl CoA:(Z)-3-hexen-1-ol acetyltransferase	3.19567	3.24279	880.039	2.14323e-193	5.01835e-192	0.752608	1.21195	0.710084	3.96085	4.07372	3.98301	43	45	31	330	483	354	Bra031989	1	-	-	-	-	-	-
Bra025083	Bra025083.1	AT5G45340	CYP707A3	CYP707A3;(+)-abscisic acid 8'-hydroxylase/ oxygen binding	-3.03785	3.12286	879.063	3.49387e-193	8.17143e-192	4.00344	3.9818	3.99874	1.2255	0.995361	0.790481	429	317	318	48	55	37	Bra025083	1	-	-	-	-	-	-
Bra030462	Bra030462.1	-	-	-	-2.71612	3.33249	878.655	4.28539e-193	1.00169e-191	4.11291	4.18811	4.20836	1.6704	1.51637	1.23365	463	366	368	66	80	51	Bra030462	1	-	-	-	-	-	-
Bra015938	Bra015938.1	AT1G74090	SOT18,ATSOT18,ATST5B	SOT18 (DESULFO-GLUCOSINOLATE SULFOTRANSFERASE 18);3-methylthiopropyl-desulfoglucosinolate sulfotransferase/ 4-methylthiobutyl-desulfoglucosinolate sulfotransferase/ 5-methylthiopentyl-desulfoglucosinolate sulfotransferase/ 7-methylthioheptyl-desulfogluco	2.58615	3.53405	875.635	1.94325e-192	4.52664e-191	1.6655	1.68202	1.80154	4.31389	4.28355	4.20428	83	63	68	422	559	413	Bra015938	1	-	-	Glucosinolate genes	-	-	-
Bra039006	Bra039006.1	AT2G19590	ACO1	ACO1 (ACC OXIDASE 1);1-aminocyclopropane-1-carboxylate oxidase	2.63974	3.49078	873.472	5.73785e-192	1.33506e-190	1.61385	1.72592	1.52903	4.27595	4.20704	4.22157	80	65	56	411	530	418	Bra039006	1	-	-	-	-	-	-
Bra003448	Bra003448.1	AT3G61390	-	U-box domain-containing protein	2.67227	3.93165	863.978	6.65024e-190	1.53506e-188	1.95559	1.63674	2.22833	4.67356	4.61904	4.50736	102	61	92	542	706	510	Bra003448	1	-	-	-	-	-	-
Bra015935	Bra015935.1	AT1G74100	SOT16,ATSOT16,CORI-7,ATST5A	SOT16 (SULFOTRANSFERASE 16);desulfoglucosinolate sulfotransferase/ sulfotransferase	2.20475	3.92747	861.963	1.8227e-189	4.20015e-188	2.51116	2.41691	2.28863	4.63321	4.54166	4.65966	151	106	96	527	669	567	Bra015935	1	-	-	Glucosinolate genes	-	-	-
Bra003712	Bra003712.1	AT1G76650	CML38	calcium-binding EF hand family protein	-2.7966	3.24027	857.114	2.06543e-188	4.73269e-187	4.03323	4.15638	4.07348	1.28227	1.36918	1.31318	438	358	335	50	72	54	Bra003712	1	-	-	-	-	-	-
Bra035429	Bra035429.1	AT1G59740	-	proton-dependent oligopeptide transport (POT) family protein	-2.62381	3.6663	853.404	1.32261e-187	3.0204e-186	4.34179	4.45262	4.39136	1.71233	2.09856	1.61468	543	440	418	68	121	67	Bra035429	1	-	-	-	-	-	-
Bra025367	Bra025367.1	AT3G28940	-	avirulence-responsive protein,putative / avirulence induced gene (AIG) protein,putative	3.1905	3.11669	852.623	1.95562e-187	4.46098e-186	0.752608	0.698255	0.915254	3.83841	3.93666	3.9626	43	31	36	303	439	349	Bra025367	1	-	-	-	-	-	-
Bra028510	Bra028510.1	AT5G41860	-	unknown protein	2.07282	4.14586	851.766	3.00337e-187	6.8357e-186	2.77685	2.78176	2.65213	4.72054	4.86553	4.79741	182	137	124	560	838	624	Bra028510	1	-	-	-	-	-	-
Bra027363	Bra027363.1	AT3G14200	-	DNAJ heat shock N-terminal domain-containing protein	-2.50132	3.45433	842.145	3.7088e-185	8.37566e-184	4.21754	4.31209	4.22389	1.88722	1.8575	1.52844	498	399	372	77	102	63	Bra027363	1	-	-	-	-	-	-
Bra024891	Bra024891.1	AT2G01300	-	unknown protein	-3.86428	2.75455	837.084	4.67308e-184	1.04662e-182	3.75591	3.74098	3.57724	0.0348034	-0.359205	0.204282	361	268	237	20	20	24	Bra024891	1	-	-	-	-	-	-
Bra004320	Bra004320.1	AT1G68570	-	proton-dependent oligopeptide transport (POT) family protein	2.53111	3.67849	833.722	2.51453e-183	5.6132e-182	1.64849	2.03598	1.9767	4.3442	4.45533	4.34023	82	81	77	431	630	454	Bra004320	1	-	-	-	-	-	-
Bra010713	Bra010713.1	AT4G39070	-	zinc finger (B-box type) family protein	4.30981	2.88233	832.754	4.08255e-183	9.10352e-182	-0.5546	0.0394298	-0.771293	3.70979	3.64822	3.84264	16	19	10	277	359	321	Bra010713	1	-	-	-	-	-	-
Bra012532	Bra012532.1	AT4G19700	RING	RING;protein binding / zinc ion binding	4.68708	2.57105	831.344	8.2689e-183	1.84183e-181	-1.01473	-0.910466	-1.04129	3.48033	3.45185	3.43789	11	9	8	236	313	242	Bra012532	1	-	-	-	-	-	-
Bra006180	Bra006180.1	AT5G13100	-	unknown protein	-2.07082	3.91258	825.052	1.92915e-181	4.2783e-180	4.69651	4.63637	4.55066	2.5733	2.56389	2.60488	695	500	467	125	168	135	Bra006180	1	-	-	-	-	-	-
Bra011757	Bra011757.1	AT4G37340	CYP81D3	CYP81D3;electron carrier/ heme binding / iron ion binding / monooxygenase/ oxygen binding	-2.04304	4.30565	824.83	2.15594e-181	4.77605e-180	4.88442	4.91289	4.97205	2.85174	3.15876	2.74532	792	606	626	152	255	149	Bra011757	1	-	-	-	-	-	-
Bra001631	Bra001631.1	AT3G16430	JAL31	JAL31 (JACALIN-RELATED LECTIN 31);copper ion binding	-2.11886	3.91159	823.448	4.3058e-181	9.5179e-180	4.57798	4.69552	4.67729	2.37875	2.67776	2.5068	640	521	510	109	182	126	Bra001631	1	-	-	-	-	-	-
Bra013113	Bra013113.1	AT2G15020	-	unknown protein	-4.65206	2.41974	823.177	4.93265e-181	1.08976e-179	3.45694	3.34319	3.39725	-1.44439	-0.99392	-0.691987	293	203	209	6	12	12	Bra013113	1	-	-	-	-	-	-
Bra038962	Bra038962.1	AT4G14020	-	rapid alkalinization factor (RALF) family protein	2.57362	3.44803	819.071	3.85246e-180	8.47896e-179	1.57836	1.83015	1.50381	4.23339	4.15462	4.16195	78	70	55	399	511	401	Bra038962	1	-	-	-	-	-	-
Bra018707	Bra018707.1	AT1G48100	-	glycoside hydrolase family 28 protein / polygalacturonase (pectinase) family protein	-3.63872	2.71447	812.71	9.30253e-179	2.03203e-177	3.57868	3.62984	3.73725	0.332335	-0.0178469	0.0269205	319	248	265	25	26	21	Bra018707	1	-	-	-	-	-	-
Bra036281	Bra036281.1	AT4G02290	AtGH9B13	AtGH9B13 (Arabidopsis thaliana glycosyl hydrolase 9B13);catalytic/ hydrolase,hydrolyzing O-glycosyl compounds	-2.25191	4.00902	811.918	1.3832e-178	3.01819e-177	4.87713	4.79676	4.66312	2.55037	2.49455	2.64642	788	559	505	123	160	139	Bra036281	1	-	-	-	-	-	-
Bra013852	Bra013852.1	AT4G24972	TPD1	TPD1 (TAPETUM DETERMINANT 1)	3.30524	3.02617	808.458	7.81781e-178	1.70222e-176	0.653777	0.406128	0.710084	3.88498	3.75215	3.89097	40	25	31	313	386	332	Bra013852	1	-	-	-	-	-	-
Bra024638	Bra024638.1	AT1G24140	-	matrixin family protein	-2.02037	4.37866	807.215	1.45706e-177	3.16748e-176	5.12016	5.31796	5.11004	3.02808	3.13617	3.26866	933	803	689	172	251	215	Bra024638	1	-	-	-	-	-	-
Bra025235	Bra025235.1	AT3G26910	-	hydroxyproline-rich glycoprotein family protein	-2.19365	3.65889	806.8	1.79321e-177	3.89613e-176	4.40139	4.42958	4.38792	2.28463	2.26396	2.13593	566	433	417	102	136	97	Bra025235	1	-	-	-	-	-	-
Bra039937	Bra039937.1	AT2G22880	-	VQ motif-containing protein	-2.29305	3.8065	806.622	1.96018e-177	4.25438e-176	4.58471	4.71744	4.5164	2.21343	2.33511	2.41364	643	529	456	97	143	118	Bra039937	1	-	-	-	-	-	-
Bra037139	Bra037139.1	AT5G66900	-	disease resistance protein (CC-NBS-LRR class),putative	-2.1463	3.70402	804.646	5.27072e-177	1.1397e-175	4.45129	4.4395	4.43203	2.37875	2.29488	2.27485	586	436	430	109	139	107	Bra037139	1	-	-	-	-	-	Resistence gene
Bra011715	Bra011715.1	AT4G37240	-	unknown protein	-2.67805	3.77111	804.263	6.38608e-177	1.37941e-175	4.68613	4.76029	4.46179	2.10744	1.8575	2.10647	690	545	439	90	102	95	Bra011715	1	-	-	-	-	-	-
Bra013828	Bra013828.1	AT4G24730	-	calcineurin-like phosphoesterase family protein	3.5247	3.415	804.029	7.18053e-177	1.54937e-175	0.124168	0.653492	1.28446	4.09367	4.0223	4.06571	27	30	47	362	466	375	Bra013828	1	-	-	-	-	-	-
Bra037358	Bra037358.1	AT4G00780	-	meprin and TRAF homology domain-containing protein / MATH domain-containing protein	2.59466	3.45888	803.079	1.15534e-176	2.49028e-175	1.77927	1.56604	1.47815	4.10944	4.25238	4.19731	90	58	54	366	547	411	Bra037358	1	-	-	-	-	-	-
Bra030916	Bra030916.1	AT1G53990	GLIP3	GLIP3;carboxylesterase/ lipase	3.39156	2.93169	802.058	1.9261e-176	4.14285e-175	0.392853	0.510216	0.417809	3.76062	3.76325	3.71668	33	27	25	287	389	294	Bra030916	1	-	-	-	-	-	-
Bra002103	Bra002103.1	AT5G17760	-	AAA-type ATPase family protein	2.21848	3.72058	800.824	3.57136e-176	7.66543e-175	2.32028	2.2006	2.03066	4.39657	4.44158	4.35283	132	91	80	447	624	458	Bra002103	1	-	-	-	-	-	-
Bra024900	Bra024900.1	AT2G01180	ATPAP1,PAP1,LPP1,ATLPP1	ATPAP1 (PHOSPHATIDIC ACID PHOSPHATASE 1);phosphatidate phosphatase	-4.05021	3.11979	797.471	1.91372e-175	4.09028e-174	4.1098	4.0087	3.84157	0.666788	-0.0178469	-0.249598	462	323	285	32	26	17	Bra024900	1	-	-	-	-	-	-
Bra003743	Bra003743.1	-	-	-	2.00696	3.92726	793.1	1.70682e-174	3.6328e-173	2.60233	2.45653	2.66356	4.5945	4.60266	4.50736	161	109	125	513	698	510	Bra003743	1	-	-	-	-	-	-
Bra020096	Bra020096.1	AT5G20280	ATSPS1F	ATSPS1F (sucrose phosphate synthase 1F);sucrose-phosphate synthase/ transferase,transferring glycosyl groups	3.0842	3.0743	788.055	2.13325e-173	4.51915e-172	0.720411	0.653492	1.12823	3.90771	3.86291	3.80645	42	30	42	318	417	313	Bra020096	1	-	-	-	-	-	-
Bra023360	Bra023360.1	AT5G12020	HSP17.6II	HSP17.6II (17.6 KDA CLASS II HEAT SHOCK PROTEIN)	-3.07047	2.94377	785.936	6.16542e-173	1.30406e-171	3.79509	3.76748	3.90072	0.666788	0.836302	0.897573	371	273	297	32	49	40	Bra023360	1	-	-	-	-	-	-
Bra018850	Bra018850.1	AT1G50460	HKL1	HKL1 (HEXOKINASE-LIKE 1);ATP binding / fructokinase/ glucokinase/ hexokinase	-2.08524	4.26266	779.073	1.91473e-171	4.02478e-170	5.03109	5.18077	4.94889	3.10878	2.92839	2.86451	877	730	616	182	217	162	Bra018850	1	-	-	-	-	-	-
Bra011130	Bra011130.1	AT4G29700	-	type I phosphodiesterase/nucleotide pyrophosphatase family protein	-2.8573	3.05488	774.776	1.64521e-170	3.44226e-169	3.86671	3.86886	3.98968	1.10477	1.16116	0.997262	390	293	316	44	62	43	Bra011130	1	-	-	-	-	-	-
Bra025957	Bra025957.1	AT1G17665	-	unknown protein	2.19467	3.69634	774.661	1.74291e-170	3.6448e-169	2.35215	2.00068	2.1654	4.38041	4.3562	4.38693	135	79	88	442	588	469	Bra025957	1	-	-	-	-	-	-
Bra025668	Bra025668.1	AT1G18590	SOT17,ATSOT17,ATST5C	SOT17 (SULFOTRANSFERASE 17);desulfoglucosinolate sulfotransferase/ sulfotransferase	2.43194	3.7031	774.107	2.30044e-170	4.80331e-169	2.12504	1.96449	1.88202	4.42206	4.48915	4.31469	115	77	72	455	645	446	Bra025668	1	-	-	Glucosinolate genes	-	-	-
Bra013475	Bra013475.1	AT4G20820	-	FAD-binding domain-containing protein	-3.23356	2.83062	773.09	3.8266e-170	7.98173e-169	3.70335	3.66409	3.80591	0.220573	0.7196	0.63408	348	254	278	23	45	33	Bra013475	1	-	-	-	-	-	-
Bra007213	Bra007213.1	AT3G56060	-	glucose-methanol-choline (GMC) oxidoreductase family protein	2.82812	3.39083	763.16	5.52006e-168	1.1432e-166	1.38651	1.56604	1.02567	4.22979	4.05578	4.16195	68	58	39	398	477	401	Bra007213	1	-	-	-	-	-	-
Bra013144	Bra013144.1	AT5G41750	-	disease resistance protein (TIR-NBS-LRR class),putative	-5.58749	2.1486	763.106	5.6708e-168	1.17382e-166	3.08571	3.1553	3.26092	-2.47601	-1.46049	-2.1899	226	178	190	2	8	3	Bra013144	1	-	-	-	-	-	Resistence gene
Bra026642	Bra026642.1	AT2G01670	atnudt17	atnudt17 (Arabidopsis thaliana Nudix hydrolase homolog 17);hydrolase	2.519	4.00141	757.5	9.38776e-167	1.9373e-165	2.18525	1.54169	2.30332	4.70245	4.68278	4.53527	120	57	97	553	738	520	Bra026642	1	-	-	-	-	-	-
Bra014527	Bra014527.1	AT2G43790	ATMPK6,MPK6,MAPK6	ATMPK6 (ARABIDOPSIS THALIANA MAP KINASE 6);MAP kinase/ kinase	-3.63281	2.8136	755.33	2.78252e-166	5.7334e-165	3.75194	3.57688	3.70995	-0.103822	0.0319469	0.592178	360	239	260	18	27	32	Bra014527	1	-	-	-	-	-	-
Bra005312	Bra005312.1	AT2G35710	-	glycogenin glucosyltransferase (glycogenin)-related	-4.26926	2.62539	753.286	7.74189e-166	1.59361e-164	3.57418	3.52191	3.40408	-0.623697	-0.236224	-1.69891	318	230	210	12	22	5	Bra005312	1	-	-	-	-	-	-
Bra026058	Bra026058.1	AT1G16410	CYP79F1,BUS1,SPS1	CYP79F1 (CYTOCHROME P450 79F1);oxidoreductase,acting on paired donors,with incorporation or reduction of molecular oxygen,NADH or NADPH as one donor,and incorporation of one atom of oxygen	3.0285	3.1301	753.234	7.94605e-166	1.63481e-164	0.903624	0.903337	1.02567	3.97813	3.82104	3.96671	48	36	39	334	405	350	Bra026058	1	-	-	Glucosinolate genes	-	-	-
Bra023741	Bra023741.1	AT1G65660	SMP1	SMP1 (SWELLMAP 1);nucleic acid binding / single-stranded RNA binding	-3.05493	3.00938	753.069	8.63074e-166	1.77478e-164	3.85192	3.99979	3.80074	0.708815	1.02025	0.862752	386	321	277	33	56	39	Bra023741	1	-	-	-	-	-	-
Bra029495	Bra029495.1	AT4G04490	-	protein kinase family protein	3.03754	3.00549	744.483	6.35459e-164	1.29754e-162	0.814924	0.698255	0.915254	3.78047	3.82458	3.75516	45	31	36	291	406	302	Bra029495	1	-	-	-	-	-	-
Bra019731	Bra019731.1	AT1G11960	-	FUNCTIONS IN: molecular_function unknown;INVOLVED IN: biological_process unknown;LOCATED IN: plasma membrane;EXPRESSED IN: 22 plant structures;EXPRESSED DURING: 13 growth stages;CONTAINS InterPro DOMAIN/s: Protein of unknown function DUF221 (InterPro:IPR003864);BEST Arabidopsis thaliana protein match is: early-responsive to dehydration protein-related / ERD protein-related (TAIR:AT1G62320.1);Has …	-2.19478	3.53936	742.982	1.34701e-163	2.74495e-162	4.30427	4.30849	4.23925	2.22795	2.09856	2.01429	529	398	376	98	121	89	Bra019731	1	-	-	-	-	-	-
Bra017491	Bra017491.1	AT5G47330	-	palmitoyl protein thioesterase family protein	2.70212	3.21003	740.758	4.10156e-163	8.33314e-162	1.23521	1.3586	1.31377	3.93894	3.98802	3.93772	61	50	48	325	455	343	Bra017491	1	-	-	-	-	-	-
Bra027359	Bra027359.1	AT3G14210	ESM1	ESM1 (epithiospecifier modifier 1);carboxylesterase/ hydrolase,acting on ester bonds	-2.6033	3.49031	740.295	5.1727e-163	1.05041e-161	4.40646	4.18418	4.30641	1.77301	1.81547	1.5936	568	365	394	71	99	66	Bra027359	1	-	-	-	-	-	-
Bra012780	Bra012780.1	AT4G15550	IAGLU	IAGLU (INDOLE-3-ACETATE BETA-D-GLUCOSYLTRANSFERASE);UDP-glycosyltransferase/ transferase,transferring glycosyl groups	2.06181	3.7654	738.947	1.01542e-162	2.0579e-161	2.51116	2.30559	2.24365	4.40299	4.41837	4.43513	151	98	93	449	614	485	Bra012780	1	-	-	-	-	-	-
Bra016073	Bra016073.1	AT1G72290	-	trypsin and protease inhibitor family protein / Kunitz family protein	4.21078	2.51268	735.356	6.13091e-162	1.2382e-160	-0.721478	-0.358712	-0.899987	3.42468	3.37676	3.33367	14	14	9	227	297	225	Bra016073	1	-	-	-	-	-	-
Bra000985	Bra000985.1	AT3G01830	-	calmodulin-related protein,putative	-2.70381	3.67889	732.194	2.98569e-161	6.01797e-160	4.48282	4.5985	4.80147	2.00996	1.81547	1.94939	599	487	556	84	99	85	Bra000985	1	-	-	-	-	-	-
Bra023021	Bra023021.1	AT2G35658	-	unknown protein	-3.16087	2.78035	726.325	5.64057e-160	1.13187e-158	3.6359	3.74632	3.61894	0.385128	0.779131	0.458637	332	269	244	26	47	29	Bra023021	1	-	-	-	-	-	-
Bra026744	Bra026744.1	AT1G15825	-	hydroxyproline-rich glycoprotein family protein	-3.27105	3.05736	722.433	3.9585e-159	7.92771e-158	3.8028	3.9818	4.00324	1.07295	0.559051	0.592178	373	317	319	43	40	32	Bra026744	1	-	-	-	-	-	-
Bra004449	Bra004449.1	AT2G40940	ERS1,ERS	ERS1 (ETHYLENE RESPONSE SENSOR 1);ethylene binding / protein histidine kinase/ receptor	2.19697	3.75277	721.278	7.05908e-159	1.41164e-157	2.32028	2.13699	2.27379	4.4533	4.34885	4.50454	132	87	95	465	585	509	Bra004449	1	-	-	-	-	-	-
Bra018294	Bra018294.1	AT1G06680	PSBP-1,OEE2,PSII-P,OE23	PSBP-1 (PHOTOSYSTEM II SUBUNIT P-1);poly(U) binding	-2.05239	4.20538	718.503	2.83222e-158	5.65541e-157	5.02451	4.98014	4.80406	3.08504	2.88162	2.80156	873	635	557	179	210	155	Bra018294	1	-	-	-	-	-	-
Bra027444	Bra027444.1	AT5G42680	-	unknown protein	4.74309	2.40789	715.65	1.18162e-157	2.3537e-156	-1.24964	-1.05157	-1.19796	3.25067	3.22448	3.41404	9	8	7	201	267	238	Bra027444	1	-	-	-	-	-	-
Bra023782	Bra023782.1	AT3G22942	AGG2	AGG2 (G-PROTEIN GAMMA SUBUNIT 2)	-2.23803	3.45811	713.807	2.9742e-157	5.90704e-156	4.16168	4.19593	4.29543	2.09165	2.05105	1.82827	479	368	391	89	117	78	Bra023782	1	-	-	-	-	-	-
Bra013872	Bra013872.1	AT4G25200	ATHSP23.6-MITO	ATHSP23.6-MITO (MITOCHONDRION-LOCALIZED SMALL HEAT SHOCK PROTEIN 23.6)	-3.06059	3.23916	711.913	7.67483e-157	1.52058e-155	4.16168	4.33353	4.02998	1.38952	1.1157	0.931574	479	405	325	54	60	41	Bra013872	1	-	-	-	-	-	-
Bra017764	Bra017764.1	AT4G36500	-	unknown protein	-2.20484	3.9753	709.072	3.18426e-156	6.27826e-155	4.82509	4.5985	4.77537	2.35248	2.6541	2.6258	760	487	546	107	179	137	Bra017764	1	-	-	-	-	-	-
Bra036295	Bra036295.1	AT4G02075	PIT1	PIT1 (pitchoun 1);protein binding / zinc ion binding	-2.22064	3.43903	705.479	1.92465e-155	3.78557e-154	4.16467	4.18418	4.23159	1.79269	2.06307	2.07639	480	365	374	72	118	93	Bra036295	1	-	-	-	-	-	-
Bra026773	Bra026773.1	AT1G15340	MBD10	MBD10;DNA binding / methyl-CpG binding	-2.08472	3.57175	700.928	1.87922e-154	3.682e-153	4.34707	4.29398	4.23159	2.27067	2.21091	2.22088	545	394	374	101	131	103	Bra026773	1	-	-	-	-	-	-
Bra021239	Bra021239.1	AT4G39830	-	L-ascorbate oxidase,putative	4.56611	2.36035	698.85	5.31958e-154	1.03927e-152	-0.910214	-1.81519	-0.771293	3.3201	3.21373	3.1795	12	4	10	211	265	202	Bra021239	1	-	-	-	-	-	-
Bra004058	Bra004058.1	AT3G45140	LOX2,ATLOX2	LOX2 (LIPOXYGENASE 2);lipoxygenase	3.57838	2.84935	693.647	7.19662e-153	1.39993e-151	-0.0316155	0.607297	-0.0204941	3.64632	3.54911	3.72154	24	29	18	265	335	295	Bra004058	1	-	-	-	-	-	-
Bra000129	Bra000129.1	AT2G39310	JAL22	JAL22 (JACALIN-RELATED LECTIN 22)	2.64938	3.30805	691.208	2.44081e-152	4.73671e-151	1.56028	0.977849	1.42541	4.0121	4.06179	3.92933	77	38	52	342	479	341	Bra000129	1	-	-	-	-	-	-
Bra003083	Bra003083.1	AT5G53110	-	FUNCTIONS IN: molecular_function unknown;INVOLVED IN: biological_process unknown;LOCATED IN: endomembrane system;EXPRESSED IN: 8 plant structures;EXPRESSED DURING: 4 anthesis,C globular stage,petal differentiation and expansion stage;BEST Arabidopsis thaliana protein match is: zinc finger (C3HC4-type RING finger) family protein (TAIR:AT2G46495.1);Has 118 Blast hits to 116 proteins in 13 species: …	2.3417	3.69782	689.808	4.91968e-152	9.54273e-151	1.56028	2.16914	2.03066	4.27944	4.32907	4.28212	77	89	80	412	577	436	Bra003083	1	-	-	-	-	-	-
Bra037456	Bra037456.1	AT5G48850	ATSDI1	ATSDI1 (SULPHUR DEFICIENCY-INDUCED 1);binding	-2.42311	3.21815	689.773	5.00789e-152	9.7092e-151	3.99	4.05246	3.976	1.8121	1.40741	1.65594	425	333	313	73	74	69	Bra037456	1	-	-	-	-	-	-
Bra016562	Bra016562.1	AT1G18290	-	unknown protein	-3.26136	2.68041	686.162	3.05354e-151	5.90327e-150	3.60096	3.55271	3.51551	0.332335	0.126658	0.714399	324	235	227	25	29	35	Bra016562	1	-	-	-	-	-	-
Bra036481	Bra036481.1	AT2G20562	-	unknown protein	-2.95821	2.81014	682.904	1.56107e-150	3.00368e-149	3.64879	3.70853	3.66516	0.708815	0.779131	0.827069	335	262	252	33	47	38	Bra036481	1	-	-	-	-	-	-
Bra004484	Bra004484.1	AT2G47000	MDR4,PGP4,ABCB4,ATPGP4	ABCB4 (ATP BINDING CASSETTE SUBFAMILY B4);ATPase,coupled to transmembrane movement of substances / xenobiotic-transporting ATPase	2.08867	3.61901	680.593	4.96536e-150	9.53589e-149	2.28769	2.00068	2.28863	4.3442	4.22855	4.2722	129	79	96	431	538	433	Bra004484	1	-	-	-	-	-	-
Bra036418	Bra036418.1	AT3G03980	-	short-chain dehydrogenase/reductase (SDR) family protein	2.63966	3.44736	679.209	9.93161e-150	1.90375e-148	1.52344	1.72592	1.6257	4.37062	4.22052	4.11463	75	65	60	439	535	388	Bra036418	1	-	-	-	-	-	-
Bra012949	Bra012949.1	AT1G54050	-	17.4 kDa class III heat shock protein (HSP17.4-CIII)	-5.25722	2.0295	678.46	1.44517e-149	2.76888e-148	2.95344	3.02958	3.1352	-2.47601	-1.32896	-1.92362	206	163	174	2	9	4	Bra012949	1	-	-	-	-	-	-
Bra039495	Bra039495.1	AT5G36220	CYP81D1,CYP91A1	CYP81D1 (CYTOCHROME P450 81D1);electron carrier/ heme binding / iron ion binding / monooxygenase/ oxygen binding	2.30022	3.40101	675.883	5.25092e-149	1.00275e-147	1.89918	1.72592	1.80154	4.12892	4.05578	4.10721	98	65	68	371	477	386	Bra039495	1	-	-	-	-	-	-
Bra006256	Bra006256.1	AT5G14480	-	glycosyl transferase family 17 protein	-2.00361	3.92021	673.444	1.78112e-148	3.38862e-147	4.6244	4.58366	4.49416	2.85174	2.54687	2.46097	661	482	449	152	166	122	Bra006256	1	-	-	-	-	-	-
Bra010296	Bra010296.1	AT4G30210	ATR2,AR2	ATR2 (ARABIDOPSIS P450 REDUCTASE 2);NADPH-hemoprotein reductase	-2.51837	3.25098	672.85	2.39762e-148	4.55726e-147	4.07839	4.13211	3.93414	1.75306	1.42615	1.55048	452	352	304	70	75	64	Bra010296	1	-	-	-	-	-	-
Bra005554	Bra005554.1	AT2G32870	-	meprin and TRAF homology domain-containing protein / MATH domain-containing protein	-2.14773	3.43989	670.173	9.1616e-148	1.73733e-146	4.18841	4.10743	4.23159	1.88722	2.06307	2.17903	488	346	374	77	118	100	Bra005554	1	-	-	-	-	-	-
Bra024719	Bra024719.1	AT1G26390	-	FAD-binding domain-containing protein	2.2466	3.44372	669.293	1.42315e-147	2.69623e-146	2.00988	1.65956	1.9767	4.05753	4.17692	4.12201	106	62	77	353	519	390	Bra024719	1	-	-	-	-	-	-
Bra039194	Bra039194.1	AT4G37270	HMA1,ATHMA1	HMA1;ATPase/ cadmium-transporting ATPase/ calcium-transporting ATPase/ copper-exporting ATPase/ zinc transporting ATPase	3.14088	2.78674	664.634	1.46757e-146	2.76751e-145	0.583915	0.45911	0.470821	3.51628	3.58291	3.63649	38	26	26	242	343	278	Bra039194	1	-	-	-	-	-	-
Bra031663	Bra031663.1	AT1G09350	AtGolS3	AtGolS3 (Arabidopsis thaliana galactinol synthase 3);transferase,transferring glycosyl groups / transferase,transferring hexosyl groups	2.52931	3.25468	664.368	1.67626e-146	3.15958e-145	1.6655	1.11623	1.42541	3.90319	3.98486	3.96671	83	42	52	317	454	350	Bra031663	1	-	-	-	-	-	-
Bra011775	Bra011775.1	AT2G23060	-	GCN5-related N-acetyltransferase (GNAT) family protein	4.00178	2.42692	662.859	3.57e-146	6.70735e-145	-0.477883	-0.358712	-0.899987	3.18519	3.33274	3.30153	17	14	9	192	288	220	Bra011775	1	-	-	-	-	-	-
Bra010259	Bra010259.1	AT4G31020	-	unknown protein	-3.66744	2.71235	656.285	9.60154e-145	1.79236e-143	3.6658	3.61823	3.45101	0.277536	-0.493655	0.204282	339	246	217	24	18	24	Bra010259	1	-	-	-	-	-	-
Bra039735	Bra039735.1	AT5G49630	AAP6	AAP6 (AMINO ACID PERMEASE 6);acidic amino acid transmembrane transporter/ amino acid transmembrane transporter/ neutral amino acid transmembrane transporter	2.04178	3.59949	648.229	5.42388e-143	1.00193e-141	2.23168	2.29105	2.14923	4.27944	4.24712	4.22157	124	97	87	412	545	418	Bra039735	1	-	-	-	-	-	-
Bra039694	Bra039694.1	AT1G53840	ATPME1	ATPME1;pectinesterase	-2.03614	3.50337	643.482	5.84389e-142	1.0761e-140	4.20305	4.19983	4.25822	2.37875	2.20006	2.01429	493	369	381	109	130	89	Bra039694	1	-	-	-	-	-	-
Bra026689	Bra026689.1	AT1G17090	-	unknown protein	2.319	3.49311	639.216	4.94755e-141	9.07757e-140	1.92766	1.92736	1.37067	4.18954	4.11763	4.07715	100	75	50	387	498	378	Bra026689	1	-	-	-	-	-	-
Bra023061	Bra023061.1	AT2G36320	-	zinc finger (AN1-like) family protein	2.59539	3.10873	638.009	9.05747e-141	1.65884e-139	1.36584	1.2425	1.22398	3.93452	3.7706	3.84264	67	46	45	324	391	321	Bra023061	1	-	-	-	-	-	-
Bra016265	Bra016265.1	AT1G69790	-	protein kinase,putative	-2.29632	3.45244	637.836	9.87367e-141	1.80751e-139	4.11291	4.22299	4.1157	2.04319	1.9117	1.43671	463	375	345	86	106	59	Bra016265	1	-	-	-	-	-	-
Bra001247	Bra001247.1	AT3G07360	PUB9,ATPUB9	PUB9 (PLANT U-BOX 9);ubiquitin-protein ligase	-2.04119	3.84959	637.323	1.27694e-140	2.3355e-139	4.64598	4.65352	4.45194	2.45482	2.52964	2.73573	671	506	436	115	164	148	Bra001247	1	-	-	-	-	-	-
Bra030166	Bra030166.1	AT1G29720	-	protein kinase family protein	4.83333	2.47484	636.217	2.22136e-140	4.05736e-139	-2.09155	-0.554863	-1.19796	3.19262	3.2822	3.24857	4	12	7	193	278	212	Bra030166	1	-	-	-	-	-	-
Bra004990	Bra004990.1	AT2G40090	ATATH9	ATATH9;transporter	-2.86486	2.76487	631.935	1.89615e-139	3.45098e-138	3.69508	3.58286	3.53431	0.749652	0.918022	0.714399	346	240	230	34	52	35	Bra004990	1	-	-	-	-	-	-
Bra014430	Bra014430.1	AT3G61580	-	delta-8 sphingolipid desaturase (SLD1)	-2.20482	3.30528	630.747	3.43786e-139	6.24849e-138	4.01676	4.06533	4.07776	1.62722	1.98937	1.91581	433	336	336	64	112	83	Bra014430	1	-	-	-	-	-	-
Bra022535	Bra022535.1	AT3G45140	LOX2,ATLOX2	LOX2 (LIPOXYGENASE 2);lipoxygenase	2.80244	3.1103	628.637	9.89344e-139	1.79258e-137	1.014	1.3586	1.02567	3.79517	3.85602	4.01508	52	50	39	294	415	362	Bra022535	1	-	-	-	-	-	-
Bra016797	Bra016797.1	AT1G12030	-	unknown protein	-2.50536	3.25438	628.381	1.12445e-138	2.03556e-137	4.04303	4.06105	3.90072	1.33689	1.78675	1.43671	441	335	297	52	97	59	Bra016797	1	-	-	-	-	-	-
Bra018723	Bra018723.1	AT1G48330	-	unknown protein	2.35964	3.2376	625.906	3.88303e-138	6.99512e-137	1.68231	1.65956	1.45202	3.85254	3.9817	3.9626	84	62	53	306	453	349	Bra018723	1	-	-	-	-	-	-
Bra029242	Bra029242.1	AT5G62860	-	F-box family protein-related	-2.7481	3.11614	624.307	8.64763e-138	1.5544e-136	3.8482	4.07385	4.06919	1.2255	1.26891	1.38856	385	338	334	48	67	57	Bra029242	1	-	-	-	-	-	-
Bra005387	Bra005387.1	AT1G30620	HSR8,MUR4,UXE1	MUR4 (MURUS 4);UDP-arabinose 4-epimerase/ catalytic	-2.74885	2.88332	621.785	3.05897e-137	5.48392e-136	3.71156	3.81398	3.6248	1.28227	1.02025	0.714399	350	282	245	50	56	35	Bra005387	1	-	-	-	-	-	-
Bra013043	Bra013043.1	AT2G16890	-	UDP-glucoronosyl/UDP-glucosyl transferase family protein	4.176	2.52124	616.111	5.24226e-136	9.35674e-135	-0.477883	-0.781944	-0.653145	3.25067	3.51011	3.34002	17	10	11	201	326	226	Bra013043	1	-	-	-	-	-	-
Bra022030	Bra022030.1	AT5G46295	-	unknown protein	-2.14558	3.54602	610.514	8.6494e-135	1.53371e-133	4.31509	4.16836	4.36009	1.95863	2.29488	2.16481	533	361	409	81	139	99	Bra022030	1	-	-	-	-	-	-
Bra034235	Bra034235.1	AT3G26280	CYP71B4	CYP71B4;electron carrier/ heme binding / iron ion binding / monooxygenase/ oxygen binding	-2.51788	3.08925	608.11	2.88232e-134	5.08877e-133	3.80663	3.99531	3.89103	1.2255	1.55094	1.38856	374	320	295	48	82	57	Bra034235	1	-	-	-	-	-	-
Bra028752	Bra028752.1	AT5G05600	-	oxidoreductase,2OG-Fe(II) oxygenase family protein	2.72881	2.90196	604.87	1.46071e-133	2.56444e-132	0.845101	1.08286	1.02567	3.68368	3.61185	3.67212	46	41	39	272	350	285	Bra028752	1	-	-	-	-	-	-
Bra010117	Bra010117.1	AT5G62730	-	proton-dependent oligopeptide transport (POT) family protein	2.01329	3.52427	601.801	6.79154e-133	1.18823e-131	2.32028	1.96449	2.1654	4.09763	4.17692	4.22157	132	77	88	363	519	418	Bra010117	1	-	-	-	-	-	-
Bra000122	Bra000122.1	AT2G39200	MLO12,ATMLO12	MLO12 (MILDEW RESISTANCE LOCUS O 12);calmodulin binding	2.82206	2.82816	600.06	1.62465e-132	2.83634e-131	1.06617	0.607297	0.665301	3.61351	3.54053	3.62614	54	29	30	259	333	276	Bra000122	1	-	-	-	-	-	-
Bra021746	Bra021746.1	AT3G24900	AtRLP39	AtRLP39 (Receptor Like Protein 39);protein binding	3.09007	2.66036	596.688	8.79589e-132	1.52904e-130	0.219399	0.351125	0.753519	3.47425	3.47454	3.38978	29	24	32	235	318	234	Bra021746	1	-	-	-	-	-	-
Bra024405	Bra024405.1	AT5G65660	-	hydroxyproline-rich glycoprotein family protein	2.37536	3.31413	596.162	1.14469e-131	1.98819e-130	1.74767	1.43993	1.78069	3.89866	4.04066	4.09601	88	53	67	316	472	383	Bra024405	1	-	-	-	-	-	-
Bra010041	Bra010041.1	AT5G61900	BON1,CPN1,BON	BON1 (BONZAI 1);calcium-dependent phospholipid binding	-2.08336	3.44155	595.11	1.93841e-131	3.35961e-130	4.24042	4.16437	4.06488	2.07567	2.15582	2.06111	506	360	333	88	126	92	Bra010041	1	-	-	-	-	-	-
Bra023297	Bra023297.1	AT1G32940	ATSBT3.5,SBT3.5	SBT3.5;identical protein binding / serine-type endopeptidase	2.34149	3.30384	591.183	1.38537e-130	2.39294e-129	1.85537	1.3586	1.64888	3.89866	3.9817	4.05804	95	50	61	316	453	373	Bra023297	1	-	-	-	-	-	-
Bra016432	Bra016432.1	AT1G21120	-	O-methyltransferase,putative	3.10014	3.09156	590.834	1.64997e-130	2.84756e-129	0.619269	0.653492	1.25454	3.67311	3.90694	3.84264	39	30	46	270	430	321	Bra016432	1	-	-	-	-	-	-
Bra031281	Bra031281.1	AT3G21420	-	oxidoreductase,2OG-Fe(II) oxygenase family protein	2.66506	2.91296	590.756	1.71548e-130	2.95937e-129	1.16518	0.903337	0.989795	3.73034	3.58291	3.67212	58	36	38	281	343	285	Bra031281	1	-	-	-	-	-	-
Bra013547	Bra013547.1	AT4G21680	-	proton-dependent oligopeptide transport (POT) family protein	3.176	2.59687	589.376	3.42463e-130	5.90242e-129	0.219399	0.510216	0.183831	3.40564	3.44727	3.30802	29	27	21	224	312	221	Bra013547	1	-	-	-	-	-	-
Bra038080	Bra038080.1	AT4G15550	IAGLU	IAGLU (INDOLE-3-ACETATE BETA-D-GLUCOSYLTRANSFERASE);UDP-glycosyltransferase/ transferase,transferring glycosyl groups	2.91751	2.73828	587.607	8.30597e-130	1.42802e-128	0.784102	0.783817	0.305558	3.60797	3.47454	3.45553	44	33	23	258	318	245	Bra038080	1	-	-	-	-	-	-
Bra025169	Bra025169.1	AT3G25882	NIMIN-2	NIMIN-2 (NIM1-INTERACTING 2)	3.91453	2.43455	587.572	8.45352e-130	1.45277e-128	-1.01473	-0.453457	0.0508783	3.21466	3.19746	3.27529	11	13	19	196	262	216	Bra025169	1	-	-	-	-	-	-
Bra019058	Bra019058.1	AT4G27310	-	zinc finger (B-box type) family protein	-3.17663	2.46736	586.703	1.30635e-129	2.24029e-128	3.32398	3.36418	3.37656	0.332335	0.126658	0.362208	267	206	206	25	29	27	Bra019058	1	-	-	-	-	-	-
Bra006218	Bra006218.1	AT3G12560	TRFL9,ATTBP2	TRFL9 (TRF-LIKE 9);DNA bending/ DNA binding / telomeric DNA binding	-2.04536	3.54012	585.441	2.45807e-129	4.20476e-128	4.30155	4.14429	4.31005	2.33916	2.29488	2.03006	528	355	395	106	139	90	Bra006218	1	-	-	-	-	-	-
Bra022717	Bra022717.1	AT5G54390	AHL,ATAHL	AHL (ARABIDOPSIS HAL2-LIKE);3'(2')%2C5'-bisphosphate nucleotidase/ inositol or phosphatidylinositol phosphatase	2.00256	3.49636	585.21	2.75875e-129	4.71711e-128	2.20865	2.16914	2.06554	4.20798	4.14617	4.05804	122	89	82	392	508	373	Bra022717	1	-	-	-	-	-	-
Bra026361	Bra026361.1	AT4G27310	-	zinc finger (B-box type) family protein	-2.08998	3.37873	584.861	3.28695e-129	5.61556e-128	4.02995	4.11982	4.18476	1.8688	2.13319	2.06111	437	349	362	76	124	92	Bra026361	1	-	-	-	-	-	-
Bra023437	Bra023437.1	AT5G13820	TBP1,ATBP-1,ATBP1,ATTBP1,HPPBF-1	TBP1 (TELOMERIC DNA BINDING PROTEIN 1);DNA binding / double-stranded telomeric DNA binding	-2.29295	3.09154	581.356	1.90208e-128	3.236e-127	3.83698	3.86886	3.86651	1.55993	1.55094	1.67614	382	293	290	61	82	70	Bra023437	1	-	-	-	-	-	-
Bra031435	Bra031435.1	AT1G61340	-	F-box family protein	-2.91021	2.60277	577.709	1.18142e-127	2.00075e-126	3.47153	3.5466	3.34141	0.708815	0.48947	0.674798	296	234	201	33	38	34	Bra031435	1	-	-	-	-	-	-
Bra013177	Bra013177.1	-	-	-	-3.06502	2.54346	576.988	1.69532e-127	2.86984e-126	3.39709	3.4452	3.36261	-0.0328451	0.688888	0.362208	281	218	204	19	44	27	Bra013177	1	-	-	-	-	-	-
Bra002165	Bra002165.1	AT5G44630	-	terpene synthase/cyclase family protein	2.51215	3.17575	574.842	4.9665e-127	8.36902e-126	1.57836	1.30172	1.3983	3.77058	3.97853	3.96671	78	48	51	289	452	350	Bra002165	1	-	-	-	-	-	-
Bra027073	Bra027073.1	AT1G61890	-	MATE efflux family protein	-2.13214	3.38163	574.353	6.34474e-127	1.06871e-125	4.17659	4.15236	3.99874	1.85015	2.00192	2.15044	484	357	318	75	113	98	Bra027073	1	-	-	-	-	-	-
Bra008920	Bra008920.1	AT5G12020	HSP17.6II	HSP17.6II (17.6 KDA CLASS II HEAT SHOCK PROTEIN)	-3.25852	2.39258	573.779	8.45732e-127	1.42219e-125	3.21843	3.35722	3.29807	-0.103822	0.0319469	0.411228	248	205	195	18	27	28	Bra008920	1	-	-	-	-	-	-
Bra005567	Bra005567.1	AT3G24900	AtRLP39	AtRLP39 (Receptor Like Protein 39);protein binding	3.1945	2.68452	572.738	1.42446e-126	2.39341e-125	0.619269	0.172291	0.183831	3.58559	3.49688	3.35888	39	21	21	254	323	229	Bra005567	1	-	-	-	-	-	-
Bra010890	Bra010890.1	AT1G28230	PUP1,ATPUP1	PUP1 (PURINE PERMEASE 1);purine nucleoside transmembrane transporter/ purine transmembrane transporter	2.02971	3.43282	571.767	2.31743e-126	3.88899e-125	2.07499	1.96449	2.1654	4.0121	4.09438	4.12201	111	77	88	342	490	390	Bra010890	1	-	-	-	-	-	-
Bra000637	Bra000637.1	AT4G08040	ACS11	ACS11;1-aminocyclopropane-1-carboxylate synthase	-7.13905	1.70436	570.021	5.55665e-126	9.31718e-125	2.60233	2.7288	2.89452	-2.91251	-3.54139	-2.51671	161	132	147	1	0	2	Bra000637	1	-	-	-	-	-	-
Bra001454	Bra001454.1	AT3G12500	ATHCHIB,PR3,PR-3,CHI-B,B-CHI	ATHCHIB (ARABIDOPSIS THALIANA BASIC CHITINASE);chitinase	4.03918	2.2754	567.273	2.20056e-125	3.67166e-124	-0.721478	-0.781944	-0.653145	3.00296	3.22983	3.11439	14	10	11	169	268	193	Bra001454	1	-	-	-	-	-	-
Bra005917	Bra005917.1	AT5G06870	PGIP2,ATPGIP2	PGIP2 (POLYGALACTURONASE INHIBITING PROTEIN 2);protein binding	2.96605	2.993	566.507	3.22984e-125	5.3802e-124	0.959866	0.698255	0.989795	3.61351	3.90694	3.81558	50	31	38	259	430	315	Bra005917	1	-	-	-	-	-	-
Bra014876	Bra014876.1	AT1G30280	-	heat shock protein binding	3.25603	2.54234	566.175	3.81473e-125	6.35191e-124	0.392853	0.234398	-0.347594	3.29273	3.28734	3.41404	33	22	14	207	279	238	Bra014876	1	-	-	-	-	-	-
Bra011484	Bra011484.1	AT4G33980	-	unknown protein	6.07214	2.10326	566.025	4.11046e-125	6.84151e-124	-2.34049	-2.88408	-1.80647	2.9774	3.29245	2.98274	3	1	4	166	280	176	Bra011484	1	-	-	-	-	-	-
Bra033928	Bra033928.1	AT1G68500	-	unknown protein	6.4122	1.87007	564.716	7.91827e-125	1.31578e-123	-2.64153	-2.43419	-2.8795	2.92488	2.78329	2.63614	2	2	1	160	196	138	Bra033928	1	-	-	-	-	-	-
Bra005351	Bra005351.1	AT3G63060	EDL3	EDL3 (EID1-like 3)	-2.88273	2.60588	559.334	1.17381e-123	1.93943e-122	3.53769	3.45175	3.34851	0.436058	0.7196	0.714399	310	219	202	27	45	35	Bra005351	1	-	-	-	-	-	-
Bra009075	Bra009075.1	AT2G19930	-	RNA-dependent RNA polymerase family protein	2.31423	3.11125	556.877	4.01814e-123	6.62017e-122	1.44679	1.63674	1.50381	3.85722	3.73346	3.84264	71	61	55	307	381	321	Bra009075	1	-	-	-	-	-	-
Bra032607	Bra032607.1	AT4G01960	-	unknown protein	-4.07338	2.2288	556.102	5.92256e-123	9.74601e-122	3.11076	3.13916	3.04193	-2.14135	-0.424865	-0.799434	230	176	163	3	19	11	Bra032607	1	-	-	-	-	-	-
Bra034595	Bra034595.1	AT4G33980	-	unknown protein	4.66053	2.00456	555.831	6.78337e-123	1.11535e-121	-1.12741	-2.09175	-1.37374	2.85174	2.92839	2.85569	10	3	6	152	217	161	Bra034595	1	-	-	-	-	-	-
Bra022804	Bra022804.1	AT2G30500	-	kinase interacting family protein	-3.16281	2.41952	555.714	7.19309e-123	1.18224e-121	3.33996	3.37111	3.17568	0.0994213	0.48947	-0.0374006	270	207	179	21	38	20	Bra022804	1	-	-	-	-	-	-
Bra014747	Bra014747.1	AT3G55430	-	glycosyl hydrolase family 17 protein / beta-1%2C3-glucanase,putative	-2.47128	3.02252	553.909	1.77686e-122	2.91687e-121	3.81428	3.99082	3.75873	1.30984	1.42615	1.4833	376	319	269	51	75	61	Bra014747	1	-	-	-	-	-	-
Bra004991	Bra004991.1	AT2G40080	ELF4	ELF4 (EARLY FLOWERING 4)	5.11456	1.91171	552.98	2.82981e-122	4.63978e-121	-1.5304	-1.81519	-2.42749	2.82333	2.83329	2.74532	7	4	2	149	203	149	Bra004991	1	-	-	-	-	-	-
Bra039550	Bra039550.1	AT4G15430	-	FUNCTIONS IN: molecular_function unknown;INVOLVED IN: biological_process unknown;LOCATED IN: endomembrane system,membrane;EXPRESSED IN: 20 plant structures;EXPRESSED DURING: 13 growth stages;CONTAINS InterPro DOMAIN/s: Protein of unknown function DUF221 (InterPro:IPR003864);BEST Arabidopsis thaliana protein match is: early-responsive to dehydration protein-related / ERD protein-related (TAIR:AT3G…	-2.34404	2.96992	552.123	4.34721e-122	7.1191e-121	3.77955	3.70305	3.73183	1.25416	1.61769	1.33875	367	261	264	49	86	55	Bra039550	1	-	-	-	-	-	-
Bra010393	Bra010393.1	AT4G27870	-	integral membrane family protein	2.40905	3.01208	550.719	8.78059e-122	1.43389e-120	1.40689	1.21195	1.3983	3.73543	3.73346	3.68713	69	45	51	282	381	288	Bra010393	1	-	-	-	-	-	-
Bra003843	Bra003843.1	AT1G73480	-	hydrolase,alpha/beta fold family protein	-2.04915	3.26814	550.539	9.60913e-122	1.56857e-120	4.01344	3.94512	3.98514	2.02667	2.06307	1.73508	432	309	315	85	118	73	Bra003843	1	-	-	-	-	-	-
Bra014842	Bra014842.1	AT3G54040	-	photoassimilate-responsive protein-related	2.66305	3.45353	549.635	1.51139e-121	2.46517e-120	1.6655	1.59	1.80154	4.27245	4.57143	4.21813	83	59	68	410	683	417	Bra014842	1	-	-	-	-	-	-
Bra035574	Bra035574.1	AT5G55450	-	protease inhibitor/seed storage/lipid transfer protein (LTP) family protein	2.07476	3.31654	545.463	1.22196e-120	1.97882e-119	1.88472	1.88926	1.99491	3.96952	4.00058	3.93353	97	73	78	332	459	342	Bra035574	1	-	-	-	-	-	-
Bra001390	Bra001390.1	AT3G11110	-	zinc finger (C3HC4-type RING finger) family protein	3.39076	2.72064	543.237	3.72651e-120	6.02025e-119	0.433144	-0.0318899	0.362775	3.66779	3.64423	3.36512	34	18	24	269	358	230	Bra001390	1	-	-	-	-	-	-
Bra022607	Bra022607.1	AT5G52750	-	heavy-metal-associated domain-containing protein	-2.39329	3.19297	542.298	5.96259e-120	9.61742e-119	4.08473	3.83919	3.98057	1.60514	1.51637	1.75421	454	287	314	63	80	74	Bra022607	1	-	-	-	-	-	-
Bra024943	Bra024943.1	AT5G47450	ATTIP2%3B3,TIP2%3B3,DELTA-TIP3	AtTIP2%3B3;ammonia transporter/ methylammonium transmembrane transporter/ water channel	-4.39905	1.92717	541.212	1.02745e-119	1.65593e-118	2.83062	2.83284	3.04193	-1.44439	-1.46049	-0.799434	189	142	163	6	8	11	Bra024943	1	-	-	-	-	-	-
Bra024213	Bra024213.1	AT4G28270	-	zinc finger (C3HC4-type RING finger) family protein	2.5117	2.99101	539.632	2.26723e-119	3.64107e-118	0.987186	1.21195	1.52903	3.6571	3.65618	3.73605	51	45	56	267	361	298	Bra024213	1	-	-	-	-	-	-
Bra025846	Bra025846.1	AT1G20823	-	zinc finger (C3HC4-type RING finger) family protein	-2.47277	2.92753	539.066	3.01087e-119	4.82961e-118	3.78734	3.7935	3.58928	1.19625	1.34967	1.33875	369	278	239	47	71	55	Bra025846	1	-	-	-	-	-	-
Bra018415	Bra018415.1	AT1G10960	ATFD1	ATFD1 (FERREDOXIN 1);2 iron,2 sulfur cluster binding / electron carrier/ iron-sulfur cluster binding	-2.1901	3.14388	538.26	4.50864e-119	7.22358e-118	3.88134	3.91699	3.79556	1.85015	1.46292	1.81011	394	303	276	75	77	77	Bra018415	1	-	-	-	-	-	-
Bra015866	Bra015866.1	AT1G75100	JAC1	JAC1 (J-DOMAIN PROTEIN REQUIRED FOR CHLOROPLAST ACCUMULATION RESPONSE 1);heat shock protein binding	-2.03766	3.39945	537.74	5.85011e-119	9.36548e-118	4.19428	4.07809	4.03439	1.8688	2.17811	2.17903	490	339	326	76	128	100	Bra015866	1	-	-	-	-	-	-
Bra005957	Bra005957.1	AT5G07870	-	transferase family protein	2.75859	2.89469	536.339	1.17974e-118	1.882e-117	0.903624	1.18075	0.710084	3.68368	3.72213	3.5128	48	44	31	272	378	255	Bra005957	1	-	-	-	-	-	-
Bra011739	Bra011739.1	AT4G36950	MAPKKK21	MAPKKK21;ATP binding / protein kinase/ protein serine/threonine kinase	-3.84916	2.29963	534.016	3.77764e-118	6.00982e-117	3.30239	3.39849	3.05935	-0.731975	-0.236224	-0.410661	263	211	165	11	22	15	Bra011739	1	-	-	-	-	-	-
Bra012604	Bra012604.1	AT4G18340	-	glycosyl hydrolase family 17 protein	-2.0412	3.22903	533.531	4.81796e-118	7.65288e-117	3.9489	3.91225	3.97141	2.09165	1.77217	1.94939	413	302	312	89	96	85	Bra012604	1	-	-	-	-	-	-
Bra013557	Bra013557.1	AT4G21760	BGLU47	BGLU47 (Beta-glucosidase 47);catalytic/ cation binding / hydrolase,hydrolyzing O-glycosyl compounds	-2.22615	3.03086	532.546	7.89032e-118	1.25184e-116	3.71156	3.81906	3.83653	1.33689	1.72754	1.61468	350	283	284	52	93	67	Bra013557	1	-	-	-	-	-	-
Bra013860	Bra013860.1	AT4G25070	-	unknown protein	2.16974	3.22516	532.327	8.80237e-118	1.396e-116	1.87012	1.78936	1.45202	3.89866	3.87319	3.87795	96	68	53	316	420	329	Bra013860	1	-	-	-	-	-	-
Bra028487	Bra028487.1	AT5G41100	-	FUNCTIONS IN: molecular_function unknown;INVOLVED IN: biological_process unknown;LOCATED IN: plasma membrane;EXPRESSED IN: 23 plant structures;EXPRESSED DURING: 13 growth stages;BEST Arabidopsis thaliana protein match is: hydroxyproline-rich glycoprotein family protein (TAIR:AT3G26910.2);Has 1264 Blast hits to 964 proteins in 165 species: Archae - 2;Bacteria - 75;Metazoa - 445;Fungi - 228;Plants …	-2.19656	3.05339	529.928	2.92799e-117	4.63457e-116	3.78734	3.79865	3.81619	1.46503	1.60129	1.81011	369	279	280	57	85	77	Bra028487	1	-	-	-	-	-	-
Bra031832	Bra031832.1	AT5G67400	-	peroxidase 73 (PER73) (P73) (PRXR11)	-5.28757	1.75109	529.133	4.36168e-117	6.89047e-116	2.65438	2.70706	2.91379	-1.86989	-2.39635	-1.69891	167	130	149	4	3	5	Bra031832	1	-	-	-	-	-	-
Bra008264	Bra008264.1	AT1G76520	-	auxin efflux carrier family protein	2.48283	3.19236	525.154	3.20048e-116	5.03453e-115	1.50465	1.27241	1.67171	3.85722	4.07372	3.8823	74	47	62	307	483	330	Bra008264	1	-	-	-	-	-	-
Bra002110	Bra002110.1	AT5G17850	-	cation exchanger,putative (CAX8)	-2.33733	2.91287	524.337	4.8197e-116	7.57288e-115	3.73592	3.59475	3.68773	1.25416	1.26891	1.61468	356	242	256	49	67	67	Bra002110	1	-	-	-	-	-	-
Bra018108	Bra018108.1	AT3G47820	-	armadillo/beta-catenin repeat family protein / U-box domain-containing protein	-2.25662	3.10128	524.169	5.24263e-116	8.23105e-115	3.80663	3.96815	3.81106	1.85015	1.6339	1.38856	374	314	279	75	87	57	Bra018108	1	-	-	-	-	-	-
Bra031002	Bra031002.1	AT1G17710	-	phosphatase	-3.36494	2.20994	523.844	6.16988e-116	9.68311e-115	3.14755	3.13102	3.04193	-0.0328451	-0.359205	0.0269205	236	175	163	19	20	21	Bra031002	1	-	-	-	-	-	-
Bra003039	Bra003039.1	AT5G53730	-	harpin-induced family protein / HIN1 family protein / harpin-responsive family protein	3.13567	2.44608	522.338	1.31186e-115	2.05411e-114	0.172569	0.351125	0.0508783	3.20735	3.30263	3.1795	28	24	19	195	282	202	Bra003039	1	-	-	-	-	-	-
Bra005811	Bra005811.1	AT5G04660	CYP77A4	CYP77A4;electron carrier/ heme binding / iron ion binding / monooxygenase/ oxygen binding	-2.48605	2.8484	517.646	1.37642e-114	2.13709e-113	3.60537	3.53431	3.68773	1.10477	1.42615	0.897573	325	232	256	44	75	40	Bra005811	1	-	-	-	-	-	-
Bra005870	Bra005870.1	AT2G30750	CYP71A12	CYP71A12 (cytochrome P450,family 71,subfamily A,polypeptide 12);electron carrier/ heme binding / iron ion binding / monooxygenase/ oxygen binding	4.73947	2.46231	516.694	2.21721e-114	3.44125e-113	-2.34049	-1.20798	-0.258608	3.19262	3.05421	3.19358	3	7	15	193	237	204	Bra005870	1	-	-	-	-	-	-
Bra004772	Bra004772.1	AT2G43620	-	chitinase,putative	4.03571	2.05522	513.954	8.74678e-114	1.35291e-112	-0.721478	-1.20798	-0.899987	2.90694	2.8884	2.93325	14	7	9	158	211	170	Bra004772	1	-	-	-	-	-	-
Bra012366	Bra012366.1	AT1G23205	-	invertase/pectin methylesterase inhibitor family protein	2.60286	2.80443	513.818	9.36608e-114	1.44815e-112	1.09157	1.01371	0.795684	3.45586	3.62408	3.50153	55	39	33	232	353	253	Bra012366	1	-	-	-	-	-	-
Bra013480	Bra013480.1	AT4G20880	-	ethylene-responsive nuclear protein / ethylene-regulated nuclear protein (ERT2)	2.0029	3.30939	513.701	9.92971e-114	1.53471e-112	1.98299	1.85013	2.06554	3.9867	3.93992	3.92933	104	71	82	336	440	341	Bra013480	1	-	-	-	-	-	-
Bra011464	Bra011464.1	AT4G33720	-	pathogenesis-related protein,putative	-2.52877	2.72788	509.802	7.00373e-113	1.07838e-111	3.60096	3.4187	3.54052	0.828014	1.06876	1.20614	324	214	231	36	58	50	Bra011464	1	-	-	-	-	-	-
Bra004299	Bra004299.1	AT1G68340	-	unknown protein	-3.06214	2.48697	509.129	9.81083e-113	1.51003e-111	3.26382	3.27095	3.3696	0.789365	-0.0178469	0.362208	256	193	205	35	26	27	Bra004299	1	-	-	-	-	-	-
Bra029456	Bra029456.1	AT4G12480	pEARLI 1	pEARLI 1;lipid binding	2.06706	3.36673	505.202	7.01686e-112	1.07593e-110	2.0622	1.61356	1.99491	3.9167	3.97217	4.06571	110	60	78	320	450	375	Bra029456	1	-	-	-	-	-	-
Bra031798	Bra031798.1	AT1G12010	-	1-aminocyclopropane-1-carboxylate oxidase,putative / ACC oxidase,putative	3.69542	2.14413	504.149	1.18936e-111	1.82165e-110	-0.635628	-0.910466	-0.174794	2.90694	3.03602	2.96643	15	9	16	158	234	174	Bra031798	1	-	-	-	-	-	-
Bra036984	Bra036984.1	AT4G33710	-	pathogenesis-related protein,putative	10.0254	1.5803	502.952	2.16562e-111	3.31191e-110	-3.54139	-3.54139	-3.54139	2.50338	2.49455	2.51803	0	0	0	119	160	127	Bra036984	1	-	-	-	-	-	-
Bra018859	Bra018859.1	AT1G50590	-	pirin,putative	-2.84225	2.44641	502.405	2.84849e-111	4.35133e-110	3.28048	3.26352	3.33428	0.48525	0.7196	0.258868	259	192	200	28	45	25	Bra018859	1	-	-	-	-	-	-
Bra004314	Bra004314.1	AT1G68500	-	unknown protein	4.19408	2.08979	500.503	7.38662e-111	1.12457e-109	-1.24964	-1.38344	-0.442432	2.96011	2.80493	2.97461	9	6	13	164	199	175	Bra004314	1	-	-	-	-	-	-
Bra012773	Bra012773.1	AT4G15680	-	glutaredoxin family protein	2.68607	2.65889	499.643	1.13694e-110	1.72899e-109	0.653777	0.864587	0.836652	3.46202	3.39591	3.35262	40	35	34	233	301	228	Bra012773	1	-	-	-	-	-	-
Bra038824	Bra038824.1	AT5G48380	-	leucine-rich repeat family protein / protein kinase family protein	-2.03191	3.13447	495.784	7.85578e-110	1.18844e-108	3.84073	3.92643	3.77463	1.8688	1.72754	1.94939	383	305	272	76	93	85	Bra038824	1	-	-	-	-	-	-
Bra024088	Bra024088.1	AT4G30280	ATXTH18,XTH18	XTH18 (XYLOGLUCAN ENDOTRANSGLUCOSYLASE/HYDROLASE 18);hydrolase,acting on glycosyl bonds / hydrolase,hydrolyzing O-glycosyl compounds / xyloglucan:xyloglucosyl transferase	-2.18778	3.08918	493.143	2.95013e-109	4.44485e-108	3.77563	3.97726	3.81619	1.58271	1.69699	1.77309	366	316	280	62	91	75	Bra024088	1	-	-	-	-	-	-
Bra024116	Bra024116.1	AT4G29905	-	unknown protein	-2.57524	2.5992	488.497	3.02656e-108	4.53984e-107	3.42233	3.41199	3.38349	0.749652	0.918022	0.964792	286	213	207	34	52	42	Bra024116	1	-	-	-	-	-	-
Bra012306	Bra012306.1	AT1G22110	-	structural constituent of ribosome	-3.86298	1.90242	487.848	4.18947e-108	6.27496e-107	2.78465	2.95776	2.79409	-0.522982	-0.807219	-1.18018	183	155	137	13	14	8	Bra012306	1	-	-	-	-	-	-
Bra021082	Bra021082.1	AT4G16740	ATTPS03	ATTPS03;(E)-beta-ocimene synthase/ myrcene synthase	2.98581	2.67345	486.176	9.68063e-108	1.44729e-106	0.687478	-0.106919	0.571336	3.32687	3.5013	3.35262	41	17	28	212	324	228	Bra021082	1	-	-	-	-	-	-
Bra003554	Bra003554.1	-	-	-	3.22032	2.2841	480.652	1.54132e-106	2.28669e-105	0.0740859	0.172291	-0.442432	2.96011	3.119	3.14369	26	21	13	164	248	197	Bra003554	1	-	-	-	-	-	-
Bra032608	Bra032608.1	-	-	-	-2.1735	3.40546	480.324	1.81686e-106	2.69254e-105	4.33649	4.14833	4.08628	1.79269	2.12174	2.13593	541	356	338	72	123	97	Bra032608	1	-	-	-	-	-	-
Bra000551	Bra000551.1	AT2G25690	-	senescence-associated protein-related	-2.73268	2.56665	479.859	2.29325e-106	3.39482e-105	3.33465	3.52812	3.34141	0.902338	0.807999	0.411228	269	231	201	38	48	28	Bra000551	1	-	-	-	-	-	-
Bra018051	Bra018051.1	AT3G48520	CYP94B3	CYP94B3;electron carrier/ heme binding / iron ion binding / monooxygenase/ oxygen binding	-4.46085	2.21609	479.047	3.44424e-106	5.0876e-105	3.02109	2.92987	3.00647	-1.11622	-2.39635	-0.498479	216	152	159	8	3	14	Bra018051	1	-	-	-	-	-	-
Bra012803	Bra012803.1	AT3G52450	PUB22	PUB22 (PLANT U-BOX 22);ubiquitin-protein ligase	-2.4581	2.65958	476.495	1.23746e-105	1.82194e-104	3.40218	3.50311	3.45759	1.25416	0.944265	0.931574	282	227	218	49	53	41	Bra012803	1	-	-	-	-	-	-
Bra012907	Bra012907.1	AT3G50120	-	unknown protein	2.33296	2.8684	475.484	2.05334e-105	3.01445e-104	1.30201	1.38622	1.09485	3.57427	3.54483	3.57865	64	51	41	252	334	267	Bra012907	1	-	-	-	-	-	-
Bra030129	Bra030129.1	AT1G29240	-	unknown protein	4.25497	2.06019	470.553	2.42897e-104	3.53657e-103	-1.3832	-0.66394	-1.19796	3.06899	2.94148	2.74532	8	11	7	177	219	149	Bra030129	1	-	-	-	-	-	-
Bra012218	Bra012218.1	AT1G20190	ATEXPA11,EXP11,ATEXP11,ATHEXP ALPHA 1.14	ATEXPA11 (ARABIDOPSIS THALIANA EXPANSIN 11)	2.18678	2.96661	462.816	1.17257e-102	1.69033e-101	1.56028	1.21195	1.6257	3.57427	3.66015	3.67212	77	45	60	252	362	285	Bra012218	1	-	-	-	-	-	-
Bra039411	Bra039411.1	AT1G54300	-	unknown protein	-2.11623	3.08588	461.538	2.2246e-102	3.20233e-101	3.84447	3.68648	3.92467	1.64897	1.72754	1.82827	384	258	302	65	93	78	Bra039411	1	-	-	-	-	-	-
Bra003939	Bra003939.1	AT1G70850	MLP34	MLP34 (MLP-LIKE PROTEIN 34)	-2.05566	3.00515	461.496	2.27119e-102	3.2671e-101	3.77955	3.69754	3.67084	1.79269	1.55094	1.77309	367	260	253	72	82	75	Bra003939	1	-	-	-	-	-	-
Bra005040	Bra005040.1	AT2G39445	-	FUNCTIONS IN: molecular_function unknown;INVOLVED IN: biological_process unknown;LOCATED IN: chloroplast;CONTAINS InterPro DOMAIN/s: PIG-P (InterPro:IPR013717),Phosphatidylinositol N-acetylglucosaminyltransferase,GPI19/PIG-P subunit (InterPro:IPR016542);BEST Arabidopsis thaliana protein match is: unknown protein (TAIR:AT1G61280.1);Has 228 Blast hits to 228 proteins in 105 species: Archae - 0;Bact…	2.30626	2.83702	457.385	1.78265e-101	2.5517e-100	1.014	1.3586	1.45202	3.49842	3.54483	3.53509	52	50	53	239	334	259	Bra005040	1	-	-	-	-	-	-
Bra002319	Bra002319.1	AT5G20670	-	unknown protein	2.25928	2.87817	456.745	2.45555e-101	3.50996e-100	1.34488	1.41332	1.25454	3.55711	3.59124	3.52955	66	52	46	249	345	258	Bra002319	1	-	-	-	-	-	-
Bra017700	Bra017700.1	AT4G35160	-	O-methyltransferase family 2 protein	2.09361	3.23804	455.858	3.83015e-101	5.46522e-100	1.87012	1.74737	1.95825	3.86653	3.8834	4.07715	96	66	76	309	423	378	Bra017700	1	-	-	-	-	-	-
Bra026180	Bra026180.1	AT1G14890	-	enzyme inhibitor/ pectinesterase/ pectinesterase inhibitor	3.20656	2.25235	452.976	1.62392e-100	2.30987e-99	0.264756	-0.554863	-0.095582	3.1166	3.08991	2.91637	30	12	17	183	243	168	Bra026180	1	-	-	-	-	-	-
Bra015733	Bra015733.1	AT1G76560	CP12-3	CP12-3	-2.18346	2.84048	452.338	2.23528e-100	3.17837e-99	3.59209	3.55879	3.59526	1.51326	1.40741	1.38856	322	236	240	59	74	57	Bra015733	1	-	-	-	-	-	-
Bra033339	Bra033339.1	AT5G38700	-	unknown protein	-3.38649	2.15765	450.57	5.42077e-100	7.68904e-99	3.06662	3.20268	2.89452	-0.257198	-0.424865	0.0884959	223	184	147	16	19	22	Bra033339	1	-	-	-	-	-	-
Bra024919	Bra024919.1	AT5G47740	-	FUNCTIONS IN: molecular_function unknown;INVOLVED IN: biological_process unknown;LOCATED IN: cellular_component unknown;EXPRESSED IN: root;CONTAINS InterPro DOMAIN/s: Rossmann-like alpha/beta/alpha sandwich fold (InterPro:IPR014729);BEST Arabidopsis thaliana protein match is: protein kinase family protein / U-box domain-containing protein (TAIR:AT2G45910.1);Has 196 Blast hits to 194 proteins in 7…	3.29743	2.17875	450.276	6.28226e-100	8.90479e-99	-0.206279	-0.66394	0.183831	2.84233	3.02377	3.05393	21	11	21	151	232	185	Bra024919	1	-	-	-	-	-	-
Bra025707	Bra025707.1	AT1G19020	-	unknown protein	-2.72179	2.37244	450.002	7.20447e-100	1.02013e-98	3.1656	3.22579	3.2228	0.48525	0.807999	0.204282	239	187	185	28	48	24	Bra025707	1	-	-	-	-	-	-
Bra007552	Bra007552.1	AT3G60690	-	auxin-responsive family protein	2.61291	2.90012	447.067	3.13673e-99	4.42765e-98	0.987186	1.18075	1.22398	3.60241	3.85602	3.61572	51	44	45	257	415	274	Bra007552	1	-	Auxin genes	-	-	-	-
Bra001024	Bra001024.1	AT3G01050	MUB1	MUB1 (MEMBRANE-ANCHORED UBIQUITIN-FOLD PROTEIN 1 PRECURSOR)	2.36416	2.7506	446.356	4.47878e-99	6.30671e-98	1.04032	1.01371	1.3425	3.44347	3.48798	3.40801	53	39	49	230	321	237	Bra001024	1	-	-	-	-	-	-
Bra012270	Bra012270.1	AT1G21100	-	O-methyltransferase,putative	2.33847	2.76897	445.016	8.76608e-99	1.2331e-97	1.23521	1.01371	1.22398	3.47425	3.43807	3.49016	61	39	45	235	310	251	Bra012270	1	-	-	-	-	-	-
Bra033581	Bra033581.1	AT4G38860	-	auxin-responsive protein,putative	3.30636	2.13259	444.967	8.98582e-99	1.26357e-97	-0.145678	-0.554863	-0.095582	2.95138	2.9218	2.94162	22	12	17	163	216	171	Bra033581	1	-	Auxin genes	-	-	-	-
Bra024988	Bra024988.1	AT5G46870	-	RNA recognition motif (RRM)-containing protein	-2.14786	2.84912	443.531	1.84491e-98	2.58714e-97	3.57418	3.6124	3.57119	1.51326	1.48096	1.41283	318	245	236	59	78	58	Bra024988	1	-	-	-	-	-	-
Bra012395	Bra012395.1	AT1G28500	-	unknown protein	3.33988	2.10648	441.751	4.50078e-98	6.30062e-97	-0.0316155	-0.66394	-0.347594	2.93377	2.87482	2.94162	24	11	14	161	209	171	Bra012395	1	-	-	-	-	-	-
Bra017732	Bra017732.1	AT4G35840	-	zinc finger (C3HC4-type RING finger) family protein	2.19911	2.88804	441.74	4.52662e-98	6.33462e-97	1.40689	1.21195	1.55381	3.48033	3.55763	3.64163	69	45	57	236	337	279	Bra017732	1	-	-	-	-	-	-
Bra005070	Bra005070.1	AT2G38940	ATPT2,PHT1%3B4	ATPT2 (ARABIDOPSIS THALIANA PHOSPHATE TRANSPORTER 2);carbohydrate transmembrane transporter/ inorganic phosphate transmembrane transporter/ phosphate transmembrane transporter/ sugar:hydrogen symporter	3.15154	2.19918	441.586	4.89073e-98	6.83946e-97	0.0740859	-0.186066	-0.095582	2.98597	2.99894	2.98274	26	16	17	167	228	176	Bra005070	1	-	-	-	-	-	-
Bra020865	Bra020865.1	AT4G21870	-	26.5 kDa class P-related heat shock protein (HSP26.5-P)	3.09006	2.23691	438.565	2.22181e-97	3.1007e-96	0.264756	-0.186066	-0.095582	2.9426	2.98004	3.14369	30	16	17	162	225	197	Bra020865	1	-	-	-	-	-	-
Bra020689	Bra020689.1	AT3G07270	-	GTP cyclohydrolase I	2.65388	2.49468	438.161	2.72011e-97	3.79352e-96	0.687478	0.653492	0.571336	3.13213	3.21912	3.34002	41	30	28	185	266	226	Bra020689	1	-	-	-	-	-	-
Bra025861	Bra025861.1	-	-	-	2.04797	3.03026	437.552	3.69233e-97	5.14234e-96	1.59621	1.65956	1.73808	3.73034	3.61185	3.71179	79	62	65	281	350	293	Bra025861	1	-	-	-	-	-	-
Bra013664	Bra013664.1	AT4G11860	-	FUNCTIONS IN: molecular_function unknown;INVOLVED IN: biological_process unknown;LOCATED IN: cytosol,nucleus,plasma membrane;EXPRESSED IN: 25 plant structures;EXPRESSED DURING: 14 growth stages;CONTAINS InterPro DOMAIN/s: Protein of unknown function DUF544 (InterPro:IPR007518),Ubiquitin interacting motif (InterPro:IPR003903);BEST Arabidopsis thaliana protein match is: unknown protein (TAIR:AT4G22…	3.35063	2.08716	437.322	4.14288e-97	5.76392e-96	-0.40504	-0.0318899	-0.543945	2.81373	2.90185	2.95821	18	18	12	148	213	173	Bra013664	1	-	-	-	-	-	-
Bra032911	Bra032911.1	AT1G28480	GRX480	GRX480;electron carrier/ protein disulfide oxidoreductase	-3.79739	2.01023	437.056	4.73403e-97	6.57737e-96	2.80014	2.94852	2.81474	-0.522982	-0.565891	-2.1899	185	154	139	13	17	3	Bra032911	1	-	-	-	-	-	-
Bra013297	Bra013297.1	AT4G18340	-	glycosyl hydrolase family 17 protein	-2.02232	3.02838	435.581	9.91357e-97	1.37129e-95	3.70746	3.83919	3.67649	1.8121	1.53376	1.91581	349	287	254	73	81	83	Bra013297	1	-	-	-	-	-	-
Bra039545	Bra039545.1	AT4G15490	UGT84A3	UGT84A3;UDP-glycosyltransferase/ sinapate 1-glucosyltransferase/ transferase,transferring glycosyl groups	4.7792	1.91922	433.067	3.49383e-96	4.80343e-95	-1.5304	-1.58322	-1.57394	3.01976	2.62195	2.87329	7	5	5	171	175	163	Bra039545	1	-	-	-	-	-	-
Bra024890	Bra024890.1	AT2G01340	-	unknown protein	-2.17063	2.78472	430.99	9.89738e-96	1.35523e-94	3.51441	3.57688	3.48362	1.46503	1.20523	1.52844	305	239	222	57	64	63	Bra024890	1	-	-	-	-	-	-
Bra003444	Bra003444.1	AT3G61270	-	FUNCTIONS IN: molecular_function unknown;INVOLVED IN: biological_process unknown;LOCATED IN: cellular_component unknown;CONTAINS InterPro DOMAIN/s: Lipopolysaccharide-modifying protein (InterPro:IPR006598),Protein of unknown function DUF821,CAP10-like (InterPro:IPR008539);BEST Arabidopsis thaliana protein match is: DTA2 (DOWNSTREAM TARGET OF AGL15 2) (TAIR:AT2G45830.1);Has 461 Blast hits to 457 p…	2.97167	2.2607	429.84	1.76101e-95	2.40808e-94	0.172569	0.234398	0.0508783	2.91594	3.0662	3.09951	28	22	19	159	239	191	Bra003444	1	-	-	-	-	-	-
Bra037033	Bra037033.1	AT4G32950	-	protein phosphatase 2C,putative / PP2C,putative	2.8905	2.48547	429.805	1.79223e-95	2.44913e-94	0.219399	0.510216	0.619083	3.10091	3.26148	3.37132	29	27	29	181	274	231	Bra037033	1	-	-	-	-	-	-
Bra039037	Bra039037.1	AT3G29000	-	calcium-binding EF hand family protein	-3.11793	2.28874	424.604	2.42855e-94	3.29213e-93	3.01447	3.28569	3.26092	0.220573	0.257997	-0.0374006	215	195	190	23	32	20	Bra039037	1	-	-	-	-	-	-
Bra004171	Bra004171.1	AT1G66500	-	zinc finger (C2H2-type) family protein	-2.53935	2.53491	424.042	3.21817e-94	4.35819e-93	3.2526	3.45827	3.3199	1.10477	0.864059	0.549024	254	220	198	44	50	31	Bra004171	1	-	-	-	-	-	-
Bra008537	Bra008537.1	AT5G23130	-	peptidoglycan-binding LysM domain-containing protein	-4.22066	1.58523	422.665	6.41716e-94	8.68173e-93	2.52054	2.61668	2.49465	-0.976457	-1.94722	-1.18018	152	122	111	9	5	8	Bra008537	1	-	-	-	-	-	-
Bra006570	Bra006570.1	AT5G20670	-	unknown protein	3.80724	1.93612	420.785	1.64672e-93	2.22266e-92	-1.01473	-0.781944	-0.653145	2.73457	2.89514	2.64642	11	10	11	140	212	139	Bra006570	1	-	-	-	-	-	-
Bra017132	Bra017132.1	AT2G38240	-	oxidoreductase,2OG-Fe(II) oxygenase family protein	4.10151	1.74656	419.008	4.01192e-93	5.3972e-92	-1.3832	-1.05157	-1.19796	2.59587	2.5122	2.70657	8	8	7	127	162	145	Bra017132	1	-	-	-	-	-	-
Bra015120	Bra015120.1	AT3G25250	AGC2-1,AGC2,OXI1	AGC2-1 (OXIDATIVE SIGNAL-INDUCIBLE1);kinase	-2.2437	2.67068	418.882	4.27368e-93	5.74364e-92	3.46668	3.40526	3.38349	1.33689	1.1157	1.23365	295	212	207	52	60	51	Bra015120	1	-	-	-	-	-	-
Bra000848	Bra000848.1	AT1G52810	-	2-oxoglutarate-dependent dioxygenase-related	2.1326	2.98505	414.823	3.26774e-92	4.35717e-91	1.50465	1.65956	1.50381	3.69418	3.72213	3.5184	74	62	55	274	378	256	Bra000848	1	-	-	Glucosinolate genes	-	-	-
Bra013138	Bra013138.1	AT2G13810	ALD1	ALD1 (AGD2-LIKE DEFENSE RESPONSE PROTEIN1);catalytic/ pyridoxal phosphate binding / transaminase/ transferase,transferring nitrogenous groups	4.38917	1.92384	408.515	7.71675e-91	1.01761e-89	-1.01473	-1.81519	-1.19796	2.78455	3.01141	2.63614	11	4	7	145	230	138	Bra013138	1	-	-	-	-	-	-
Bra004512	Bra004512.1	AT2G46740	-	FAD-binding domain-containing protein	-2.19819	2.67717	407.675	1.17571e-90	1.5494e-89	3.48117	3.4187	3.34141	1.33689	1.02025	1.46019	298	214	201	52	56	60	Bra004512	1	-	-	-	-	-	-
Bra021669	Bra021669.1	AT2G30830	-	2-oxoglutarate-dependent dioxygenase,putative	6.52154	1.31958	406.881	1.75e-90	2.30399e-89	-2.64153	-3.54139	-2.8795	2.12307	2.34499	2.16481	2	0	1	91	144	99	Bra021669	1	-	-	-	-	-	-
Bra031735	Bra031735.1	AT1G11050	-	protein kinase family protein	-2.00727	2.87742	406.139	2.53846e-90	3.33881e-89	3.56515	3.52812	3.66516	1.58271	1.71235	1.4833	316	231	252	62	92	61	Bra031735	1	-	-	-	-	-	-
Bra000546	Bra000546.1	AT1G64840	-	F-box family protein	-5.5534	1.46381	405.397	3.68147e-90	4.8375e-89	2.43385	2.40345	2.28863	-3.54139	-1.76611	-2.51671	143	105	96	0	6	2	Bra000546	1	-	-	-	-	-	-
Bra028399	Bra028399.1	AT5G38100	-	methyltransferase-related	3.55954	1.873	400.866	3.56865e-89	4.6532e-88	-0.812762	-1.05157	-0.258608	2.62908	2.66992	2.78305	13	8	15	130	181	153	Bra028399	1	-	-	-	-	-	-
Bra039208	Bra039208.1	AT2G23690	-	unknown protein	-3.12358	2.11403	400.548	4.18481e-89	5.45312e-88	3.03425	2.96693	2.81474	0.0348034	-0.565891	0.258868	218	156	139	20	17	25	Bra039208	1	-	-	-	-	-	-
Bra017351	Bra017351.1	AT3G25770	AOC2	AOC2 (ALLENE OXIDE CYCLASE 2);allene-oxide cyclase	3.10252	2.08249	399.237	8.07134e-89	1.04873e-87	-0.269539	0.0394298	-0.095582	2.93377	2.80493	2.88201	20	19	17	161	199	164	Bra017351	1	-	-	-	-	-	-
Bra000344	Bra000344.1	AT2G44180	MAP2A	MAP2A (METHIONINE AMINOPEPTIDASE 2A);aminopeptidase/ metalloexopeptidase	2.70986	2.49825	396.934	2.56111e-88	3.31081e-87	0.814924	0.607297	0.245978	3.36021	3.26148	3.09951	45	29	22	217	274	191	Bra000344	1	-	-	-	-	-	-
Bra018249	Bra018249.1	AT2G31380	STH	STH;protein domain specific binding / transcription factor/ zinc ion binding	-3.05805	2.4049	392.863	1.97035e-87	2.53024e-86	3.29694	3.49679	3.11868	-0.103822	0.339352	0.63408	262	226	172	18	34	33	Bra018249	1	-	-	-	-	-	-
Bra040601	Bra040601.1	AT3G02800	-	phosphatase/ phosphoprotein phosphatase/ protein tyrosine phosphatase	-2.69746	2.35338	392.25	2.6792e-87	3.43726e-86	3.11696	3.21043	3.02431	-0.178473	0.62543	0.63408	231	185	161	17	42	33	Bra040601	1	-	-	-	-	-	-
Bra026124	Bra026124.1	AT1G15520	PDR12,ATPDR12	PDR12 (PLEIOTROPIC DRUG RESISTANCE 12);ATPase,coupled to transmembrane movement of substances	2.83779	2.20385	389.763	9.32157e-87	1.19065e-85	0.172569	-0.0318899	0.470821	3.06899	2.93495	2.89068	28	18	26	177	218	165	Bra026124	1	-	-	-	-	-	-
Bra025605	Bra025605.1	AT5G40140	-	armadillo/beta-catenin repeat family protein / U-box domain-containing protein	2.02453	3.33622	389.43	1.10159e-86	1.40663e-85	2.197	1.94604	1.92064	4.26543	4.0037	3.96671	121	76	74	408	460	350	Bra025605	1	-	-	-	-	-	-
Bra026262	Bra026262.1	AT4G32480	-	unknown protein	-3.3587	1.76911	382.995	2.7723e-85	3.50695e-84	2.63724	2.78176	2.58158	-0.849043	-0.236224	-0.691987	165	137	118	10	22	12	Bra026262	1	-	-	-	-	-	-
Bra008056	Bra008056.1	AT5G17680	-	disease resistance protein (TIR-NBS-LRR class),putative	2.83391	2.36136	382.323	3.88245e-85	4.90215e-84	0.219399	0.0394298	0.795684	3.18519	2.99894	3.03059	29	19	33	192	228	182	Bra008056	1	-	-	-	-	-	Resistence gene
Bra008728	Bra008728.1	AT5G14940	-	proton-dependent oligopeptide transport (POT) family protein	2.66731	2.29077	382.161	4.21278e-85	5.31759e-84	0.124168	0.653492	0.571336	3.06899	3.02377	2.99887	27	30	28	177	232	178	Bra008728	1	-	-	-	-	-	-
Bra004634	Bra004634.1	AT2G41660	MIZ1	MIZ1 (mizu-kussei 1)	-3.45314	1.71971	381.55	5.72116e-85	7.21036e-84	2.67972	2.56927	2.60548	-0.428841	-0.641935	-0.915531	170	118	120	14	16	10	Bra004634	1	-	-	-	-	-	-
Bra001449	Bra001449.1	AT3G12320	-	unknown protein	-4.21002	1.44417	381.525	5.79479e-85	7.3009e-84	2.46333	2.4695	2.22833	-1.44439	-1.60522	-1.33326	146	110	92	6	7	7	Bra001449	1	-	-	-	-	-	-
Bra004435	Bra004435.1	AT2G47710	-	universal stress protein (USP) family protein	2.0716	2.80074	379.279	1.78659e-84	2.24122e-83	1.30201	1.46605	1.50381	3.48033	3.3671	3.52955	64	54	55	236	295	258	Bra004435	1	-	-	-	-	-	-
Bra020090	Bra020090.1	AT5G20190	-	binding	2.92199	2.11143	378.874	2.18833e-84	2.74266e-83	-0.0875197	0.293942	-0.0204941	2.91594	2.82626	2.90786	23	23	18	159	202	167	Bra020090	1	-	-	-	-	-	-
Bra033494	Bra033494.1	AT4G15550	IAGLU	IAGLU (INDOLE-3-ACETATE BETA-D-GLUCOSYLTRANSFERASE);UDP-glycosyltransferase/ transferase,transferring glycosyl groups	2.67472	2.6153	378.672	2.42185e-84	3.0344e-83	0.433144	1.01371	0.795684	3.18519	3.46551	3.37132	34	39	33	192	316	231	Bra033494	1	-	-	-	-	-	-
Bra030526	Bra030526.1	AT1G03220	-	extracellular dermal glycoprotein,putative / EDGP,putative	-2.74352	2.11038	378.333	2.87052e-84	3.59433e-83	2.96035	2.88217	2.97011	0.332335	0.339352	0.14755	207	147	155	25	34	23	Bra030526	1	-	-	-	-	-	-
Bra039693	Bra039693.1	AT4G08500	MEKK1,ATMEKK1,MAPKKK8,ARAKIN	MEKK1 (MAP KINASE KINASE KINASE 1);DNA binding / MAP kinase kinase kinase/ kinase/ kinase binding / protein binding	2.12154	3.08788	377.792	3.7649e-84	4.70989e-83	1.68231	1.27241	1.80154	3.84784	3.71071	3.60523	84	47	68	305	375	272	Bra039693	1	-	-	-	-	-	-
Bra031956	Bra031956.1	AT3G04000	-	short-chain dehydrogenase/reductase (SDR) family protein	2.26636	2.86998	375.871	9.86053e-84	1.23053e-82	1.30201	1.41332	1.37067	3.67311	3.42881	3.65187	64	52	50	270	308	281	Bra031956	1	-	-	-	-	-	-
Bra000760	Bra000760.1	AT4G12030	-	bile acid:sodium symporter family protein	3.22865	2.03532	374.637	1.83064e-83	2.28032e-82	-0.335699	-0.358712	-0.095582	2.69329	2.80493	2.98274	19	14	17	136	199	176	Bra000760	1	-	-	Glucosinolate genes	-	-	-
Bra024859	Bra024859.1	-	-	-	6.40477	1.20789	373.357	3.47757e-83	4.31858e-82	-3.02241	-2.88408	-2.8795	2.04319	2.15582	2.12128	1	1	1	86	126	96	Bra024859	1	-	-	-	-	-	-
Bra020405	Bra020405.1	AT5G57887	-	unknown protein	-2.24872	2.60405	372.665	4.92078e-83	6.09964e-82	3.44714	3.21813	3.3696	1.25416	1.16116	1.02902	291	186	205	49	62	44	Bra020405	1	-	-	-	-	-	-
Bra033745	Bra033745.1	AT5G44460	-	calcium-binding protein,putative	2.55428	2.33631	372.134	6.42161e-83	7.95517e-82	0.547674	0.45911	0.710084	3.09299	3.07217	3.01481	37	26	31	180	240	180	Bra033745	1	-	-	-	-	-	-
Bra021358	Bra021358.1	AT3G03440	-	armadillo/beta-catenin repeat family protein	2.33674	2.64873	371.953	7.03053e-83	8.70421e-82	0.874659	1.38622	0.876488	3.27885	3.33274	3.27529	47	51	35	205	288	216	Bra021358	1	-	-	-	-	-	-
Bra004309	Bra004309.1	AT1G68440	-	unknown protein	-2.11285	2.63449	371.852	7.39516e-83	9.15287e-82	3.35052	3.378	3.36261	1.19625	1.36918	1.26065	272	208	204	47	72	52	Bra004309	1	-	-	-	-	-	-
Bra007544	Bra007544.1	AT3G60550	CYCP3%3B2	CYCP3%3B2 (cyclin p3%3B2);cyclin-dependent protein kinase	-2.96322	1.92704	367.945	5.2446e-82	6.4519e-81	2.7291	2.7288	2.90418	-0.103822	-0.296404	0.204282	176	132	148	18	21	24	Bra007544	1	-	-	-	-	-	-
Bra015095	Bra015095.1	AT5G28235	-	Ulp1 protease family protein	3.16673	2.10041	367.878	5.42155e-82	6.66758e-81	-0.206279	-0.186066	0.0508783	2.83286	2.86798	3.12911	21	16	19	150	208	195	Bra015095	1	-	-	-	-	-	-
Bra039316	Bra039316.1	AT2G45760	BAP2,BAL	BAP2 (BON ASSOCIATION PROTEIN 2)	-3.00577	2.02949	367.326	7.15048e-82	8.78324e-81	2.87518	2.78176	2.85518	-0.257198	-0.236224	0.411228	195	137	143	16	22	28	Bra039316	1	-	-	-	-	-	-
Bra033588	Bra033588.1	AT4G38960	-	zinc finger (B-box type) family protein	-2.16198	2.56115	366.205	1.25455e-81	1.5387e-80	3.27494	3.30028	3.32711	1.1664	1.20523	1.14948	258	197	199	46	64	48	Bra033588	1	-	-	-	-	-	-
Bra012251	Bra012251.1	AT1G20823	-	zinc finger (C3HC4-type RING finger) family protein	-2.75204	2.2714	365.8	1.53732e-81	1.88324e-80	3.15359	3.21813	2.92333	0.0994213	0.688888	0.362208	237	186	150	21	44	27	Bra012251	1	-	-	-	-	-	-
Bra032232	Bra032232.1	AT1G47603	ATPUP19	ATPUP19;purine transmembrane transporter	-3.66041	1.7836	364.774	2.5705e-81	3.14322e-80	2.72099	2.99411	2.60548	-0.428841	-1.09719	-0.591991	175	159	120	14	11	13	Bra032232	1	-	-	-	-	-	-
Bra018781	Bra018781.1	AT1G49230	-	zinc finger (C3HC4-type RING finger) family protein	4.46981	1.61625	364.772	2.57357e-81	3.14603e-80	-2.09155	-0.910466	-1.80647	2.39171	2.43102	2.4375	4	9	4	110	153	120	Bra018781	1	-	-	-	-	-	-
Bra032383	Bra032383.1	AT1G30370	-	lipase class 3 family protein	-2.68107	2.14126	361.56	1.28772e-80	1.56196e-79	2.9465	2.83284	3.10198	0.385128	0.299248	0.411228	205	142	170	26	33	28	Bra032383	1	-	-	-	-	-	-
Bra012363	Bra012363.1	AT1G23130	-	Bet v I allergen family protein	-2.74139	2.35715	361.158	1.57559e-80	1.91e-79	3.03425	3.35022	3.26843	0.436058	0.62543	0.549024	218	204	191	27	42	31	Bra012363	1	-	-	-	-	-	-
Bra012299	Bra012299.1	AT1G21920	-	MORN (Membrane Occupation and Recognition Nexus) repeat-containing protein /phosphatidylinositol-4-phosphate 5-kinase-related	2.43986	2.3825	360.6	2.08452e-80	2.52468e-79	0.784102	0.864587	0.417809	3.05277	3.09577	3.12177	44	35	25	175	244	194	Bra012299	1	-	-	-	-	-	-
Bra006749	Bra006749.1	AT5G58670	ATPLC1,ATPLC,PLC1	PLC1 (PHOSPHOLIPASE C 1);phospholipase C	2.31478	2.57285	359.502	3.61357e-80	4.36492e-79	0.987186	1.14885	0.836652	3.13983	3.35737	3.25529	51	43	34	186	293	213	Bra006749	1	-	-	-	-	-	-
Bra016306	Bra016306.1	AT1G27100	-	FUNCTIONS IN: molecular_function unknown;INVOLVED IN: biological_process unknown;LOCATED IN: vacuole;EXPRESSED IN: 23 plant structures;EXPRESSED DURING: 13 growth stages;CONTAINS InterPro DOMAIN/s: Protein of unknown function DUF569 (InterPro:IPR007679),Actin_cross-linking (InterPro:IPR008999);BEST Arabidopsis thaliana protein match is: unknown protein (TAIR:AT1G69900.1);Has 184 Blast hits to 118…	-6.89939	0.989032	359.499	3.61982e-80	4.37118e-79	1.96935	1.85013	2.1814	-2.91251	-3.54139	-2.93993	103	71	89	1	0	1	Bra016306	1	-	-	-	-	-	-
Bra003923	Bra003923.1	AT1G71480	-	nuclear transport factor 2 (NTF2) family protein	4.71007	1.773	358.919	4.8415e-80	5.83431e-79	-1.5304	-1.20798	-2.8795	2.70372	2.41234	2.8468	7	7	1	137	151	160	Bra003923	1	-	-	-	-	-	-
Bra018433	Bra018433.1	AT1G10550	XTH33,XET	XTH33;hydrolase,acting on glycosyl bonds / hydrolase,hydrolyzing O-glycosyl compounds / xyloglucan:xyloglucosyl transferase	2.9838	2.23884	350.86	2.75344e-78	3.28115e-77	0.547674	-0.269808	-0.174794	2.90694	2.92839	2.91637	37	15	16	158	217	168	Bra018433	1	-	-	-	-	-	-
Bra028422	Bra028422.1	AT3G17900	-	unknown protein	2.53793	2.44166	349.585	5.21694e-78	6.19864e-77	0.720411	0.824767	-0.095582	3.13213	3.08402	3.09951	42	34	17	185	242	191	Bra028422	1	-	-	-	-	-	-
Bra016437	Bra016437.1	AT1G21050	-	unknown protein	2.10022	3.18377	346.408	2.56722e-77	3.037e-76	2.00988	1.68202	1.71629	3.93894	3.6992	4.01508	106	63	64	325	372	362	Bra016437	1	-	-	-	-	-	-
Bra014476	Bra014476.1	AT3G60690	-	auxin-responsive family protein	2.01865	2.72466	345.403	4.2481e-77	5.01673e-76	1.25782	1.41332	1.50381	3.43723	3.32278	3.35262	62	52	55	229	286	228	Bra014476	1	-	Auxin genes	-	-	-	-
Bra017343	Bra017343.1	AT3G25882	NIMIN-2	NIMIN-2 (NIM1-INTERACTING 2)	2.19067	2.545	345.332	4.4014e-77	5.19626e-76	1.014	1.2425	0.953006	3.16269	3.28734	3.17241	52	46	37	189	279	201	Bra017343	1	-	-	-	-	-	-
Bra032925	Bra032925.1	AT1G29020	-	calcium-binding EF hand family protein	-2.20695	2.4251	343.757	9.69709e-77	1.14185e-75	3.21843	3.20268	3.06797	1.0071	1.13861	0.827069	248	184	166	41	61	38	Bra032925	1	-	-	-	-	-	-
Bra006194	Bra006194.1	AT5G13320	PBS3,GDG1,WIN3,GH3.12	PBS3 (AVRPPHB SUSCEPTIBLE 3)	3.12442	1.85592	343.064	1.37258e-76	1.6125e-75	-0.335699	-0.269808	-0.442432	2.70372	2.70103	2.49548	19	15	13	137	185	125	Bra006194	1	-	Auxin genes	-	-	-	-
Bra026104	Bra026104.1	AT1G15780	-	unknown protein	3.04248	1.89803	342.451	1.86637e-76	2.19071e-75	-0.0316155	-0.453457	-0.347594	2.69329	2.71634	2.60488	24	13	14	136	187	135	Bra026104	1	-	-	-	-	-	-
Bra011889	Bra011889.1	AT4G38860	-	auxin-responsive protein,putative	2.02966	2.69921	342.25	2.06457e-76	2.42196e-75	1.36584	1.18075	1.47815	3.26483	3.34757	3.40801	67	44	54	203	291	237	Bra011889	1	-	Auxin genes	-	-	-	-
Bra030368	Bra030368.1	-	-	-	-2.16915	2.64419	339.919	6.64386e-76	7.75816e-75	3.37658	3.35722	3.21505	1.36345	1.26891	0.674798	277	205	184	53	67	34	Bra030368	1	-	-	-	-	-	-
Bra000390	Bra000390.1	AT2G45510	CYP704A2	CYP704A2;electron carrier/ heme binding / iron ion binding / monooxygenase/ oxygen binding	3.47344	1.67393	339.386	8.68232e-76	1.0124e-74	-0.721478	-0.554863	-1.19796	2.40456	2.46766	2.58365	14	12	7	111	157	133	Bra000390	1	-	-	-	-	-	-
Bra026176	Bra026176.1	AT1G14960	-	major latex protein-related / MLP-related	-7.54335	0.852979	339.08	1.01234e-75	1.18009e-74	1.74767	1.90844	1.9767	-3.54139	-3.05201	-3.54139	88	74	77	0	1	0	Bra026176	1	-	-	-	-	-	-
Bra033946	Bra033946.1	AT1G68340	-	unknown protein	-2.18249	2.62267	337.954	1.78015e-75	2.07395e-74	3.31323	3.33613	3.2305	0.97302	1.06876	1.5722	265	202	186	40	58	65	Bra033946	1	-	-	-	-	-	-
Bra008216	Bra008216.1	AT1G75690	-	chaperone protein dnaJ-related	-2.445	2.61218	337.145	2.67034e-75	3.1084e-74	3.47153	3.3219	3.21505	1.0404	1.1157	0.458637	296	200	184	42	60	29	Bra008216	1	-	-	-	-	-	-
Bra001644	Bra001644.1	AT3G16870	-	zinc finger (GATA type) family protein	2.47939	2.37633	333.001	2.13345e-74	2.46021e-73	0.619269	0.74167	0.665301	3.01139	3.21373	2.99887	39	32	30	170	265	178	Bra001644	1	-	-	-	-	-	-
Bra023614	Bra023614.1	AT5G17350	-	unknown protein	-4.15147	1.41834	331.47	4.59754e-74	5.27777e-73	2.3416	2.13699	2.41574	-2.91251	-1.20842	-1.33326	134	87	105	1	10	7	Bra023614	1	-	-	-	-	-	-
Bra024336	Bra024336.1	-	-	-	-2.48294	2.29993	330.722	6.69052e-74	7.67392e-73	2.96723	3.10632	3.21505	0.277536	0.864059	0.714399	208	172	184	24	50	35	Bra024336	1	-	-	-	-	-	-
Bra035150	Bra035150.1	AT1G80820	CCR2,ATCCR2	CCR2 (CINNAMOYL COA REDUCTASE);cinnamoyl-CoA reductase	-2.70465	2.0063	330.647	6.94767e-74	7.96662e-73	2.7291	2.96693	2.81474	0.220573	0.416362	-0.104724	176	156	139	23	36	19	Bra035150	1	-	-	-	-	-	-
Bra016025	Bra016025.1	AT1G73010	-	phosphatase	2.34554	2.44446	326.75	4.90398e-73	5.57607e-72	0.784102	0.824767	0.953006	3.18519	3.22448	2.98274	44	34	37	192	267	176	Bra016025	1	-	-	-	-	-	-
Bra022605	Bra022605.1	AT5G52760	-	heavy-metal-associated domain-containing protein	-2.73429	2.688	324.308	1.66932e-72	1.88755e-71	3.72785	3.65843	3.1352	0.789365	0.918022	1.06009	354	253	174	35	52	45	Bra022605	1	-	-	-	-	-	-
Bra002562	Bra002562.1	AT5G59490	-	haloacid dehalogenase-like hydrolase family protein	-3.10436	1.79933	321.577	6.56718e-72	7.38059e-71	2.72099	2.80241	2.46883	0.0348034	-0.236224	-0.799434	175	139	109	20	22	11	Bra002562	1	-	-	-	-	-	-
Bra029798	Bra029798.1	AT3G09870	-	auxin-responsive family protein	-2.16104	2.36827	319.643	1.7329e-71	1.94003e-70	3.08571	3.04699	3.18364	0.938112	1.18337	0.752942	226	165	180	39	63	36	Bra029798	1	-	Auxin genes	-	-	-	-
Bra039982	Bra039982.1	AT2G29460	ATGSTU4,GST22	ATGSTU4 (ARABIDOPSIS THALIANA GLUTATHIONE S-TRANSFERASE TAU 4);glutathione transferase	2.15148	2.45953	316.438	8.64423e-71	9.62191e-70	0.903624	1.14885	1.02567	3.0609	3.18651	3.09951	48	43	39	176	260	191	Bra039982	1	-	-	-	-	-	-
Bra023884	Bra023884.1	AT3G21420	-	oxidoreductase,2OG-Fe(II) oxygenase family protein	3.6457	1.49878	314.972	1.80333e-70	2.00072e-69	-1.24964	-1.38344	-0.653145	2.41729	2.30504	2.24812	9	6	11	112	140	105	Bra023884	1	-	-	-	-	-	-
Bra036653	Bra036653.1	AT1G62660	-	beta-fructosidase (BFRUCT3) / beta-fructofuranosidase / invertase,vacuolar	-3.02422	2.14863	312.981	4.89516e-70	5.40886e-69	2.91839	3.08119	2.75188	0.666788	-0.0178469	-0.410661	201	169	133	32	26	15	Bra036653	1	-	-	-	-	-	-
Bra022228	Bra022228.1	AT3G17640	-	leucine-rich repeat family protein	2.0109	2.91251	312.851	5.22629e-70	5.77317e-69	1.36584	1.51691	1.84234	3.61351	3.4101	3.58401	67	56	70	259	304	268	Bra022228	1	-	-	-	-	-	-
Bra000184	Bra000184.1	AT2G40330	-	Bet v I allergen family protein	5.34425	1.24241	311.888	8.47165e-70	9.32776e-69	-2.34049	-2.43419	-2.42749	2.45482	2.15582	1.9822	3	2	2	115	126	87	Bra000184	1	-	-	-	-	-	-
Bra021925	Bra021925.1	AT2G34650	PID,ABR	PID (PINOID);kinase/ protein kinase/ protein serine/threonine kinase	-2.3196	2.1873	310.613	1.606e-69	1.764e-68	2.97407	2.81262	3.05067	0.938112	0.52468	0.63408	209	140	164	39	39	33	Bra021925	1	-	-	-	-	-	-
Bra024637	Bra024637.1	AT1G24130	-	transducin family protein / WD-40 repeat family protein	-3.28884	1.50352	309.628	2.63188e-69	2.88224e-68	2.48265	2.26153	2.38844	-0.849043	-0.722211	-0.591991	148	95	103	10	15	13	Bra024637	1	-	-	-	-	-	-
Bra009139	Bra009139.1	AT5G05840	-	unknown protein	2.17723	2.40242	309.456	2.86932e-69	3.14059e-68	0.814924	0.903337	1.12823	3.10878	3.02377	3.09201	45	36	42	182	232	190	Bra009139	1	-	-	-	-	-	-
Bra023857	Bra023857.1	AT3G21890	-	zinc finger (B-box type) family protein	-3.40103	1.44813	309.243	3.19229e-69	3.49315e-68	2.27666	2.41691	2.36062	-0.849043	-1.09719	-0.591991	128	106	101	10	11	13	Bra023857	1	-	-	-	-	-	-
Bra000080	Bra000080.1	AT2G38640	-	unknown protein	2.54549	2.33385	307.793	6.60675e-69	7.21002e-68	0.752608	0.559572	0.521954	3.3403	3.0662	2.99887	43	28	27	214	239	178	Bra000080	1	-	-	-	-	-	-
Bra026572	Bra026572.1	AT2G02950	PKS1	PKS1 (PHYTOCHROME KINASE SUBSTRATE 1);protein binding	2.51493	2.74932	307.312	8.40853e-69	9.1665e-68	1.28008	1.0487	0.710084	3.7046	3.31274	3.53509	63	40	31	276	284	259	Bra026572	1	-	-	-	-	-	-
Bra035502	Bra035502.1	AT5G52320	CYP96A4	CYP96A4;electron carrier/ heme binding / iron ion binding / monooxygenase/ oxygen binding	2.19821	2.36074	304.912	2.80242e-68	3.04281e-67	0.653777	0.941074	1.09485	3.05277	3.06022	2.97461	40	37	41	175	238	175	Bra035502	1	-	-	-	-	-	-
Bra002212	Bra002212.1	AT5G19110	-	extracellular dermal glycoprotein-related / EDGP-related	-3.65872	1.56192	303.247	6.46363e-68	6.99753e-67	2.38333	2.37616	2.38844	-1.44439	-0.424865	-1.33326	138	103	103	6	19	7	Bra002212	1	-	-	-	-	-	-
Bra007828	Bra007828.1	AT2G24850	TAT3,TAT	TAT3 (TYROSINE AMINOTRANSFERASE 3);L-tyrosine:2-oxoglutarate aminotransferase/ transaminase	2.05411	2.74188	300.077	3.16962e-67	3.40876e-66	1.36584	1.41332	1.3425	3.53392	3.26148	3.40196	67	52	49	245	274	236	Bra007828	1	-	-	-	-	-	-
Bra002271	Bra002271.1	AT5G19890	-	peroxidase,putative	-2.94351	2.3634	299.667	3.8924e-67	4.18056e-66	3.09201	3.06419	3.40408	-0.731975	0.62543	0.258868	227	167	210	11	42	25	Bra002271	1	-	-	-	-	-	-
Bra027864	Bra027864.1	AT1G58420	-	FUNCTIONS IN: molecular_function unknown;INVOLVED IN: biological_process unknown;LOCATED IN: cellular_component unknown;EXPRESSED IN: 21 plant structures;EXPRESSED DURING: 11 growth stages;CONTAINS InterPro DOMAIN/s: Uncharacterised conserved protein UCP031279 (InterPro:IPR016972);BEST Arabidopsis thaliana protein match is: unknown protein (TAIR:AT1G10140.1);Has 28 Blast hits to 28 proteins in 6 …	-2.16146	2.27309	299.049	5.30827e-67	5.69523e-66	3.06021	2.90144	3.04193	1.1664	0.836302	0.674798	222	149	163	46	49	34	Bra027864	1	-	-	-	-	-	-
Bra024795	Bra024795.1	AT2G02990	RNS1,ATRNS1	RNS1 (RIBONUCLEASE 1);endoribonuclease/ ribonuclease	5.52628	1.02249	298.278	7.81425e-67	8.36404e-66	-2.64153	-3.54139	-2.08382	1.94111	1.75745	2.06111	2	0	3	80	95	92	Bra024795	1	-	-	-	-	-	-
Bra019843	Bra019843.1	AT1G65800	ARK2	ARK2 (A. THALIANA RECEPTOR KINASE 2);kinase/ protein kinase/ transmembrane receptor protein serine/threonine kinase	9.5206	1.10072	296.351	2.05535e-66	2.19418e-65	-3.54139	-3.54139	-3.54139	1.79269	2.18913	1.9822	0	0	0	72	129	87	Bra019843	1	-	-	-	-	-	-
Bra037204	Bra037204.1	AT1G49860	ATGSTF14	ATGSTF14;glutathione transferase	-3.29342	1.43262	294.855	4.35244e-66	4.63308e-65	2.38333	2.21607	2.33226	-0.731975	-0.565891	-1.18018	138	92	99	11	17	8	Bra037204	1	-	-	-	-	-	-
Bra011722	Bra011722.1	AT4G37150	ATMES9,MES9	MES9 (METHYL ESTERASE 9);hydrolase,acting on ester bonds / methyl indole-3-acetate esterase/ methyl jasmonate esterase/ methyl salicylate esterase	2.51616	2.02267	292.199	1.6501e-65	1.75008e-64	0.308731	0.234398	0.362775	2.73457	2.79054	2.67681	31	22	24	140	197	142	Bra011722	1	-	-	-	-	-	-
Bra010292	Bra010292.1	AT5G57560	TCH4,XTH22	TCH4 (Touch 4);hydrolase,acting on glycosyl bonds / xyloglucan:xyloglucosyl transferase	2.14932	2.34453	291.392	2.47292e-65	2.61731e-64	1.06617	0.903337	0.665301	2.99449	2.97368	3.06163	54	36	30	168	224	186	Bra010292	1	-	-	-	-	-	-
Bra030376	Bra030376.1	AT1G52565	-	unknown protein	-3.14114	1.51438	290.759	3.39725e-65	3.59373e-64	2.50172	2.37616	2.22833	-0.731975	-0.807219	-0.249598	150	103	92	11	14	17	Bra030376	1	-	-	-	-	-	-
Bra007800	Bra007800.1	AT2G25430	-	epsin N-terminal homology (ENTH) domain-containing protein	-2.2782	2.11518	290.224	4.4431e-65	4.69276e-64	2.88247	2.81262	2.91379	0.789365	0.453379	0.752942	196	140	149	35	37	36	Bra007800	1	-	-	-	-	-	-
Bra029254	Bra029254.1	AT5G62520	SRO5	SRO5 (SIMILAR TO RCD ONE 5);NAD+ ADP-ribosyltransferase	-2.11213	2.27746	289.243	7.27076e-65	7.66339e-64	2.98088	3.12283	2.90418	0.865655	0.891293	1.06009	210	174	148	37	51	45	Bra029254	1	-	-	-	-	-	-
Bra000281	Bra000281.1	AT2G42940	-	DNA-binding family protein	3.83162	1.40078	287.567	1.68511e-64	1.76969e-63	-0.910214	-1.38344	-2.42749	2.18393	2.20006	2.20706	12	6	2	95	130	102	Bra000281	1	-	-	-	-	-	-
Bra022582	Bra022582.1	AT5G60610	-	F-box family protein	-5.27472	0.817583	286.626	2.7018e-64	2.83083e-63	1.88472	1.8099	1.67171	-2.47601	-3.05201	-2.1899	97	69	62	2	1	3	Bra022582	1	-	-	-	-	-	-
Bra005169	Bra005169.1	AT2G37700	-	catalytic/ iron ion binding / oxidoreductase	3.07437	1.62114	284.985	6.155e-64	6.42086e-63	-0.477883	-0.781944	-0.347594	2.32572	2.47668	2.3647	17	10	14	105	158	114	Bra005169	1	-	-	-	-	-	-
Bra015876	Bra015876.1	AT1G75000	-	GNS1/SUR4 membrane family protein	-2.25312	2.16989	284.929	6.33319e-64	6.60167e-63	2.99441	2.75022	2.9884	0.749652	0.779131	0.63408	212	134	157	34	47	33	Bra015876	1	-	-	-	-	-	-
Bra016002	Bra016002.1	AT1G73260	-	trypsin and protease inhibitor family protein / Kunitz family protein	3.03309	1.99618	284.62	7.39254e-64	7.70395e-63	-0.0875197	0.0394298	-1.37374	2.75477	2.79054	2.51803	23	19	6	142	197	127	Bra016002	1	-	-	-	-	-	-
Bra031180	Bra031180.1	AT2G21320	-	zinc finger (B-box type) family protein	-2.34881	2.29405	283.891	1.06586e-63	1.10991e-62	3.18932	2.85278	3.15962	0.578873	0.944265	0.827069	243	144	177	30	53	38	Bra031180	1	-	-	-	-	-	-
Bra030904	Bra030904.1	AT4G29090	-	reverse transcriptase,putative / RNA-dependent DNA polymerase,putative	2.11553	2.34039	283.62	1.22111e-63	1.27125e-62	1.16518	0.864587	0.619083	3.06899	2.99894	2.92484	58	35	29	177	228	169	Bra030904	1	-	-	-	-	-	-
Bra016267	Bra016267.1	AT1G69760	-	unknown protein	2.24401	2.20626	282.028	2.71437e-63	2.81789e-62	0.720411	0.74167	0.619083	2.96011	2.79775	2.91637	42	32	29	164	198	168	Bra016267	1	-	-	-	-	-	-
Bra008873	Bra008873.1	AT5G12890	-	UDP-glucoronosyl/UDP-glucosyl transferase family protein	2.68724	2.00172	281.862	2.95076e-63	3.05939e-62	0.308731	-0.186066	0.305558	2.9774	2.69332	2.69671	31	16	23	166	184	144	Bra008873	1	-	-	-	-	-	-
Bra004946	Bra004946.1	AT2G45900	-	unknown protein	2.35462	2.53915	279.305	1.0644e-62	1.09605e-61	1.014	1.11623	0.836652	3.41201	3.06022	3.37132	52	42	34	225	238	231	Bra004946	1	-	-	-	-	-	-
Bra025432	Bra025432.1	AT5G38260	-	serine/threonine protein kinase,putative	2.27552	2.13296	273.4	2.06029e-61	2.09661e-60	0.392853	0.74167	0.710084	2.93377	2.73149	2.80156	33	32	31	161	189	155	Bra025432	1	-	-	-	-	-	-
Bra038747	Bra038747.1	AT4G21903	-	antiporter/ drug transporter	2.5919	1.87008	273.269	2.19993e-61	2.2376e-60	0.219399	-0.106919	0.118886	2.56188	2.68556	2.5068	29	17	20	124	183	126	Bra038747	1	-	-	-	-	-	-
Bra031848	Bra031848.1	AT5G65690	PCK2,PEPCK	PCK2 (PHOSPHOENOLPYRUVATE CARBOXYKINASE 2);ATP binding / phosphoenolpyruvate carboxykinase (ATP)/ phosphoenolpyruvate carboxykinase/ purine nucleotide binding	-2.76008	1.88737	273.206	2.27138e-61	2.30969e-60	2.63724	2.66258	2.56947	0.666788	-0.069421	-0.410661	165	126	117	32	25	15	Bra031848	1	-	-	-	-	-	-
Bra017086	Bra017086.1	AT2G39200	MLO12,ATMLO12	MLO12 (MILDEW RESISTANCE LOCUS O 12);calmodulin binding	2.39992	2.26364	271.267	6.00863e-61	6.08868e-60	0.720411	0.74167	0.521954	3.10091	3.07217	2.75484	42	32	27	181	240	150	Bra017086	1	-	-	-	-	-	-
Bra028879	Bra028879.1	AT5G02230	-	haloacid dehalogenase-like hydrolase family protein	-2.75746	1.69634	269.499	1.4591e-60	1.4723e-59	2.61113	2.31998	2.61728	0.0348034	-0.069421	-0.327883	162	99	121	20	25	16	Bra028879	1	-	-	-	-	-	-
Bra034156	Bra034156.1	AT3G10960	-	xanthine/uracil permease family protein	2.31852	2.76591	269.461	1.48715e-60	1.50024e-59	1.56028	0.783817	0.989795	3.37986	3.44727	3.19358	77	33	38	220	312	204	Bra034156	1	-	-	-	-	-	-
Bra012021	Bra012021.1	AT2G27420	-	cysteine proteinase,putative	3.10905	1.74567	268.014	3.07499e-60	3.09285e-59	-0.5546	0.0394298	-0.899987	2.49139	2.62195	2.31404	16	19	9	118	175	110	Bra012021	1	-	-	-	-	-	-
Bra038465	Bra038465.1	AT4G16447	-	unknown protein	3.77952	1.4164	267.03	5.03688e-60	5.04494e-59	-1.12741	-0.910466	-1.80647	1.97594	2.43102	2.3011	10	9	4	82	153	109	Bra038465	1	-	-	-	-	-	-
Bra013724	Bra013724.1	AT4G23700	ATCHX17,CHX17	ATCHX17 (CATION/H+ EXCHANGER 17);monovalent cation:proton antiporter/ sodium:hydrogen antiporter	4.31441	1.05225	266.558	6.38495e-60	6.38731e-59	-2.34049	-1.58322	-1.80647	1.8121	1.96394	1.91581	3	5	4	73	110	83	Bra013724	1	-	-	-	-	-	-
Bra003598	Bra003598.1	AT1G79680	-	wall-associated kinase,putative	3.46075	1.33216	265.161	1.28731e-59	1.28306e-58	-1.01473	-1.20798	-1.04129	2.12307	2.23236	2.03006	11	7	8	91	133	90	Bra003598	1	-	-	-	-	-	-
Bra001732	Bra001732.1	AT3G19030	-	unknown protein	-3.76974	1.30819	263.508	2.95103e-59	2.92622e-58	2.51116	2.07044	2.21286	-1.271	-0.99392	-1.50453	151	83	91	7	12	6	Bra001732	1	-	-	-	-	-	-
Bra033722	Bra033722.1	AT1G03870	FLA9	FLA9 (FASCICLIN-LIKE ARABINOOGALACTAN 9)	-2.82969	1.63721	263.095	3.63079e-59	3.59589e-58	2.59346	2.26153	2.53255	-0.257198	-0.359205	-0.0374006	160	95	114	16	20	20	Bra033722	1	-	-	-	-	-	-
Bra027487	Bra027487.1	AT5G43360	PHT3,ATPT4	PHT3 (PHOSPHATE TRANSPORTER 3);carbohydrate transmembrane transporter/ inorganic phosphate transmembrane transporter/ phosphate transmembrane transporter/ sugar:hydrogen symporter	-2.84288	1.52884	262.933	3.93749e-59	3.89679e-58	2.39358	2.40345	2.28863	-0.623697	-0.424865	-0.0374006	139	105	96	12	19	20	Bra027487	1	-	-	-	-	-	-
Bra026986	Bra026986.1	AT1G12200	-	flavin-containing monooxygenase family protein / FMO family protein	4.25947	1.28066	261.578	7.77135e-59	7.66865e-58	-2.34049	-1.81519	-0.899987	2.22795	1.95106	1.99833	3	4	9	98	109	88	Bra026986	1	-	-	-	-	-	-
Bra013683	Bra013683.1	AT4G23280	-	protein kinase,putative	2.36433	1.98416	260.338	1.44848e-58	1.42554e-57	0.510498	0.510216	0.0508783	2.66155	2.66203	2.71635	36	27	19	133	180	146	Bra013683	1	-	-	-	-	-	-
Bra032992	Bra032992.1	AT3G27250	-	unknown protein	6.40389	0.717977	259.318	2.41672e-58	2.37442e-57	-3.02241	-2.88408	-3.54139	1.79269	1.48096	1.5936	1	1	0	72	78	66	Bra032992	1	-	-	-	-	-	-
Bra019541	Bra019541.1	AT3G48410	-	hydrolase,alpha/beta fold family protein	5.08837	0.849399	258.673	3.33939e-58	3.27698e-57	-2.09155	-3.54139	-2.42749	1.75306	1.71235	1.7157	4	0	2	70	92	72	Bra019541	1	-	-	-	-	-	-
Bra005563	Bra005563.1	AT3G47570	-	leucine-rich repeat transmembrane protein kinase,putative	3.17016	1.8923	257.197	7.00738e-58	6.85658e-57	-0.5546	0.293942	-0.653145	2.90694	2.6138	2.5068	16	23	11	158	174	126	Bra005563	1	-	-	-	-	-	-
Bra012266	Bra012266.1	AT1G21050	-	unknown protein	2.7865	1.64787	257	7.73458e-58	7.56632e-57	-0.206279	-0.453457	-0.174794	2.36568	2.39341	2.42562	21	13	16	108	149	119	Bra012266	1	-	-	-	-	-	-
Bra033808	Bra033808.1	AT3G46670	UGT76E11	UGT76E11 (UDP-GLUCOSYL TRANSFERASE 76E11);UDP-glycosyltransferase/ quercetin 3-O-glucosyltransferase/ quercetin 7-O-glucosyltransferase/ transferase,transferring glycosyl groups	3.08632	1.66211	254.802	2.33173e-57	2.26792e-56	-0.5546	0.0394298	-1.19796	2.50338	2.38386	2.23456	16	19	7	119	148	104	Bra033808	1	-	-	-	-	-	-
Bra011891	Bra011891.1	AT4G38840	-	auxin-responsive protein,putative	2.0934	2.48088	254.172	3.19848e-57	3.10501e-56	0.903624	1.38622	0.953006	2.9774	3.09577	3.24857	48	51	37	166	244	212	Bra011891	1	-	Auxin genes	-	-	-	-
Bra000742	Bra000742.1	AT4G11360	RHA1B	RHA1B;protein binding / zinc ion binding	2.07461	2.22393	253.534	4.40667e-57	4.26772e-56	0.752608	0.941074	0.876488	2.78455	2.87482	2.94994	43	37	35	145	209	172	Bra000742	1	-	-	-	-	-	-
Bra012651	Bra012651.1	AT4G17670	-	senescence-associated protein-related	2.27155	2.02265	252.339	8.0257e-57	7.74131e-56	0.619269	0.172291	0.619083	2.62908	2.76132	2.69671	39	21	29	130	193	144	Bra012651	1	-	-	-	-	-	-
Bra015558	Bra015558.1	AT1G07160	-	protein phosphatase 2C,putative / PP2C,putative	-2.56698	2.78536	251.987	9.57563e-57	9.2232e-56	3.48117	3.39849	3.83147	1.46503	1.02025	0.411228	298	211	283	57	56	28	Bra015558	1	-	-	-	-	-	-
Bra018656	Bra018656.1	AT1G08090	ATNRT2:1,NRT2,NRT2%3B1AT,ACH1,LIN1,ATNRT2.1,NRT2.1	ATNRT2:1 (NITRATE TRANSPORTER 2:1);nitrate transmembrane transporter	3.05089	1.4578	251.44	1.26043e-56	1.21289e-55	-0.5546	-1.20798	-0.347594	2.12307	2.33511	2.19311	16	7	14	91	143	101	Bra018656	1	-	-	-	-	-	-
Bra035182	Bra035182.1	AT1G80450	-	VQ motif-containing protein	-2.07561	2.11503	250.958	1.60514e-56	1.54314e-55	2.87518	2.89184	2.70839	0.6235	0.7196	1.06009	195	148	129	31	45	45	Bra035182	1	-	-	-	-	-	-
Bra017619	Bra017619.1	AT4G33980	-	unknown protein	7.10164	0.619615	250.809	1.73046e-56	1.66205e-55	-3.54139	-2.88408	-3.54139	1.51326	1.64993	1.33875	0	1	0	59	88	55	Bra017619	1	-	-	-	-	-	-
Bra011710	Bra011710.1	AT4G36820	-	unknown protein	-2.43136	1.76293	249.473	3.38283e-56	3.23916e-55	2.55746	2.43024	2.62899	-0.0328451	0.126658	0.458637	156	107	122	19	29	29	Bra011710	1	-	-	-	-	-	-
Bra017759	Bra017759.1	AT4G36410	UBC17	UBC17 (UBIQUITIN-CONJUGATING ENZYME 17);small conjugating protein ligase/ ubiquitin-protein ligase	2.83117	1.57018	248.205	6.39334e-56	6.10744e-55	-0.5546	-0.358712	-0.174794	2.25657	2.25351	2.46097	16	14	16	100	135	122	Bra017759	1	-	-	-	-	-	-
Bra021672	Bra021672.1	AT2G30840	-	2-oxoglutarate-dependent dioxygenase,putative	2.23962	2.02797	247.984	7.14328e-56	6.81744e-55	0.219399	0.607297	0.795684	2.68279	2.69332	2.73573	29	29	33	135	184	148	Bra021672	1	-	-	-	-	-	-
Bra019744	Bra019744.1	AT1G12110	NRT1.1,CHL1-1,NRT1,B-1,ATNRT1,CHL1	NRT1.1;nitrate transmembrane transporter/ transporter	3.0793	1.51708	247.184	1.06759e-55	1.0165e-54	-0.269539	-0.910466	-0.899987	2.39171	2.12174	2.40156	20	9	9	110	123	117	Bra019744	1	-	-	-	-	-	-
Bra025251	Bra025251.1	AT3G27150	-	kelch repeat-containing F-box family protein	-2.65455	1.57468	245.674	2.27811e-55	2.1585e-54	2.33098	2.29105	2.53255	0.220573	-0.236224	-0.498479	133	97	114	23	22	14	Bra025251	1	-	-	-	-	-	-
Bra026621	Bra026621.1	AT2G02010	GAD4	GAD4 (glutamate decarboxylase 4);calmodulin binding	2.21129	2.75604	245.479	2.5122e-55	2.37864e-54	1.34488	1.33044	0.521954	3.56857	3.37676	3.22134	66	49	27	251	297	208	Bra026621	1	-	-	-	-	-	-
Bra027623	Bra027623.1	AT1G74090	SOT18,ATSOT18,ATST5B	SOT18 (DESULFO-GLUCOSINOLATE SULFOTRANSFERASE 18);3-methylthiopropyl-desulfoglucosinolate sulfotransferase/ 4-methylthiobutyl-desulfoglucosinolate sulfotransferase/ 5-methylthiopentyl-desulfoglucosinolate sulfotransferase/ 7-methylthioheptyl-desulfogluco	-2.26144	1.89103	244.992	3.20854e-55	3.03302e-54	2.61113	2.70706	2.61728	0.0994213	0.52468	0.63408	162	130	121	21	39	33	Bra027623	1	-	-	Glucosinolate genes	-	-	-
Bra016554	Bra016554.1	-	-	-	9.23514	0.825651	242.423	1.16543e-54	1.09582e-53	-3.54139	-3.54139	-3.54139	1.75306	1.9117	1.46019	0	0	0	70	106	60	Bra016554	1	-	-	-	-	-	-
Bra023381	Bra023381.1	AT5G12900	-	unknown protein	-2.25539	2.37077	241.119	2.24287e-54	2.10066e-53	3.35052	2.95776	3.1352	1.0404	1.06876	0.674798	272	155	174	42	58	34	Bra023381	1	-	-	-	-	-	-
Bra011052	Bra011052.1	AT4G28703	-	FUNCTIONS IN: molecular_function unknown;LOCATED IN: cellular_component unknown;EXPRESSED IN: 6 plant structures;EXPRESSED DURING: 4 anthesis,F mature embryo stage,petal differentiation and expansion stage,D bilateral stage,E expanded cotyledon stage;CONTAINS InterPro DOMAIN/s: Cupin,RmlC-type (InterPro:IPR011051),Protein of unknown function DUF861,cupin-3 (InterPro:IPR008579),RmlC-like jelly rol…	-2.5593	1.60873	240.89	2.51534e-54	2.35261e-53	2.52054	2.27636	2.3746	-0.178473	-0.0178469	0.0269205	152	96	102	17	26	21	Bra011052	1	-	-	-	-	-	-
Bra011070	Bra011070.1	AT4G28940	-	catalytic	5.27056	0.97126	239.857	4.22663e-54	3.94683e-53	-2.64153	-2.43419	-2.42749	1.48935	1.95106	2.09151	2	2	2	58	109	94	Bra011070	1	-	-	-	-	-	-
Bra011711	Bra011711.1	AT4G36850	-	INVOLVED IN: biological_process unknown;LOCATED IN: membrane;CONTAINS InterPro DOMAIN/s: Cystinosin/ERS1p repeat (InterPro:IPR006603);BEST Arabidopsis thaliana protein match is: PQ-loop repeat family protein / transmembrane family protein (TAIR:AT2G41050.1);Has 599 Blast hits to 441 proteins in 106 species: Archae - 0;Bacteria - 0;Metazoa - 197;Fungi - 311;Plants - 38;Viruses - 0;Other Eukaryotes…	-3.59222	1.07935	237.264	1.55368e-53	1.44354e-52	1.98299	1.76852	2.1814	-1.44439	-1.20842	-1.33326	104	67	89	6	10	7	Bra011711	1	-	-	-	-	-	-
Bra027823	Bra027823.1	AT5G58120	-	disease resistance protein (TIR-NBS-LRR class),putative	-3.61149	1.03522	236.074	2.82399e-53	2.61663e-52	1.76356	2.01844	2.08267	-1.271	-1.46049	-1.33326	89	80	83	7	8	7	Bra027823	1	-	-	-	-	-	Resistence gene
Bra010030	Bra010030.1	AT5G49540	-	unknown protein	-2.14949	1.93223	233.132	1.23668e-52	1.13682e-51	2.69637	2.67383	2.60548	0.532821	0.339352	0.862752	172	127	120	29	34	39	Bra010030	1	-	-	-	-	-	-
Bra004967	Bra004967.1	AT2G40330	-	Bet v I allergen family protein	4.99205	0.760383	232.255	1.92105e-52	1.76233e-51	-2.34049	-2.88408	-2.42749	1.6704	1.75745	1.41283	3	1	2	66	95	58	Bra004967	1	-	-	-	-	-	-
Bra033910	Bra033910.1	-	-	-	7.02896	0.780414	231.218	3.23385e-52	2.95468e-51	-3.54139	-3.54139	-2.42749	1.6704	1.44465	1.63546	0	0	2	66	76	68	Bra033910	1	-	-	-	-	-	-
Bra014237	Bra014237.1	AT1G71400	AtRLP12	AtRLP12 (Receptor Like Protein 12);protein binding	2.68764	1.59096	230.981	3.64299e-52	3.32552e-51	-0.477883	-0.0318899	-0.174794	2.28463	2.22167	2.48406	17	18	16	102	132	124	Bra014237	1	-	-	-	-	-	-
Bra019034	Bra019034.1	AT4G27657	-	unknown protein	-5.44005	0.916477	230.443	4.77244e-52	4.35361e-51	1.68231	2.00068	1.6257	-1.44439	-2.68725	-3.54139	84	79	60	6	2	0	Bra019034	1	-	-	-	-	-	-
Bra026395	Bra026395.1	AT4G26890	MAPKKK16	MAPKKK16;ATP binding / kinase/ protein kinase/ protein serine/threonine kinase/ protein tyrosine kinase	-2.98864	1.32494	230.322	5.07009e-52	4.6241e-51	2.14943	2.05331	2.42919	-0.731975	-0.641935	-0.498479	117	82	106	11	16	14	Bra026395	1	-	-	-	-	-	-
Bra019633	Bra019633.1	AT3G53010	-	FUNCTIONS IN: molecular_function unknown;INVOLVED IN: biological_process unknown;LOCATED IN: endomembrane system;CONTAINS InterPro DOMAIN/s: Protein of unknown function DUF303,acetylesterase putative (InterPro:IPR005181);BEST Arabidopsis thaliana protein match is: hydrolase (TAIR:AT4G34215.2);Has 199 Blast hits to 199 proteins in 58 species: Archae - 0;Bacteria - 119;Metazoa - 0;Fungi - 1;Plants …	2.87795	1.41604	227.123	2.52813e-51	2.29137e-50	-0.812762	-0.453457	-0.347594	2.04319	2.20006	2.24812	13	13	14	86	130	105	Bra019633	1	-	-	-	-	-	-
Bra004564	Bra004564.1	AT2G46150	-	FUNCTIONS IN: molecular_function unknown;INVOLVED IN: biological_process unknown;LOCATED IN: plasma membrane;EXPRESSED IN: 15 plant structures;EXPRESSED DURING: 7 growth stages;CONTAINS InterPro DOMAIN/s: Harpin-induced 1 (InterPro:IPR010847);BEST Arabidopsis thaliana protein match is: unknown protein (TAIR:AT3G54200.1);Has 137 Blast hits to 136 proteins in 12 species: Archae - 0;Bacteria - 0;Met…	3.72221	1.1389	226.18	4.05843e-51	3.67343e-50	-1.12741	-1.81519	-1.57394	1.75306	2.13319	1.91581	10	4	5	70	124	83	Bra004564	1	-	-	-	-	-	-
Bra007982	Bra007982.1	AT1G71380	ATGH9B3,ATCEL3	ATCEL3 (ARABIDOPSIS THALIANA CELLULASE 3);catalytic/ hydrolase,hydrolyzing O-glycosyl compounds	2.89608	1.39655	225.769	4.99088e-51	4.50941e-50	-0.721478	-0.66394	-0.347594	2.12307	2.18913	2.13593	14	11	14	91	129	97	Bra007982	1	-	-	-	-	-	-
Bra039219	Bra039219.1	AT2G23960	-	defense-related protein,putative	-4.08214	0.745775	224.71	8.49295e-51	7.65156e-50	1.59621	1.65956	1.80154	-2.47601	-1.60522	-1.92362	79	62	68	2	7	4	Bra039219	1	-	-	-	-	-	-
Bra014877	Bra014877.1	AT1G30370	-	lipase class 3 family protein	-3.33687	1.21474	224.019	1.20181e-50	1.08155e-49	1.88472	2.16914	2.2588	-0.522982	-1.09719	-1.50453	97	89	94	13	11	6	Bra014877	1	-	-	-	-	-	-
Bra031981	Bra031981.1	AT3G03650	EDA5	EDA5 (embryo sac development arrest 5);catalytic	-2.00165	2.03414	223.6	1.48324e-50	1.33246e-49	2.7291	2.75022	2.7303	0.749652	0.688888	0.931574	176	134	131	34	44	41	Bra031981	1	-	-	-	-	-	-
Bra003863	Bra003863.1	AT1G72960	-	root hair defective 3 GTP-binding (RHD3) family protein	-5.76654	0.407234	223.101	1.90559e-50	1.70962e-49	1.38651	1.3586	1.42541	-2.47601	-3.54139	-2.93993	68	50	52	2	0	1	Bra003863	1	-	-	-	-	-	Resistence gene
Bra035102	Bra035102.1	AT2G21820	-	unknown protein	-2.0213	2.40145	222.626	2.41855e-50	2.16504e-49	2.93953	3.30028	3.16767	1.30984	1.09242	1.09051	204	197	178	51	59	46	Bra035102	1	-	-	-	-	-	-
Bra026356	Bra026356.1	AT4G27360	-	dynein light chain,putative	-4.9502	0.519113	221.776	3.70636e-50	3.31131e-49	1.54198	1.38622	1.50381	-2.47601	-2.39635	-2.93993	76	51	55	2	3	1	Bra026356	1	-	-	-	-	-	-
Bra017064	Bra017064.1	AT2G39560	-	unknown protein	-2.50191	1.66021	220.881	5.8116e-50	5.17399e-49	2.33098	2.36232	2.53255	0.48525	-0.296404	-0.0374006	133	102	114	28	21	20	Bra017064	1	-	-	-	-	-	-
Bra001367	Bra001367.1	AT3G10525	-	FUNCTIONS IN: molecular_function unknown;INVOLVED IN: biological_process unknown;LOCATED IN: cellular_component unknown;EXPRESSED IN: 22 plant structures;EXPRESSED DURING: 13 growth stages;BEST Arabidopsis thaliana protein match is: SIM (SIAMESE);cyclin-dependent protein kinase inhibitor (TAIR:AT5G04470.1);Has 23 Blast hits to 23 proteins in 6 species: Archae - 0;Bacteria - 0;Metazoa - 0;Fungi - …	2.32705	1.96841	220.595	6.70797e-50	5.96549e-49	0.653777	0.293942	0.118886	2.82333	2.6541	2.48406	40	23	20	149	179	124	Bra001367	1	-	-	-	-	-	-
Bra031232	Bra031232.1	-	-	-	-2.4525	1.83309	220.529	6.93573e-50	6.16535e-49	2.46333	2.56927	2.78365	-0.0328451	0.559051	0.0269205	146	118	136	19	40	21	Bra031232	1	-	-	-	-	-	-
Bra014164	Bra014164.1	AT1G48960	-	universal stress protein (USP) family protein	-2.0634	1.93211	218.509	1.91273e-49	1.68921e-48	2.64583	2.76081	2.52003	0.6235	0.836302	0.362208	166	135	113	31	49	27	Bra014164	1	-	-	-	-	-	-
Bra035844	Bra035844.1	AT5G63450	CYP94B1	CYP94B1;electron carrier/ heme binding / iron ion binding / monooxygenase/ oxygen binding	5.67833	0.522607	216.793	4.52759e-49	3.97863e-48	-2.64153	-2.88408	-3.54139	1.2255	1.44465	1.50604	2	1	0	48	76	62	Bra035844	1	-	-	-	-	-	-
Bra025953	Bra025953.1	AT1G17710	-	phosphatase	-3.95039	0.726796	215.065	1.07868e-48	9.43009e-48	1.69893	1.68202	1.55381	-1.86989	-1.76611	-1.92362	85	63	57	4	6	4	Bra025953	1	-	-	-	-	-	-
Bra015989	Bra015989.1	AT1G73480	-	hydrolase,alpha/beta fold family protein	-2.26037	1.89115	214.696	1.29805e-48	1.13332e-47	2.61989	2.48236	2.81474	0.48525	0.126658	0.752942	163	111	139	28	29	36	Bra015989	1	-	-	-	-	-	-
Bra010718	Bra010718.1	AT4G38960	-	zinc finger (B-box type) family protein	-6.90107	0.250508	213.734	2.10501e-48	1.83315e-47	1.34488	1.11623	1.22398	-3.54139	-3.05201	-3.54139	66	42	45	0	1	0	Bra010718	1	-	-	-	-	-	-
Bra026044	Bra026044.1	AT1G16510	-	auxin-responsive family protein	3.00443	1.43996	211.378	6.87435e-48	5.94584e-47	-0.5546	-0.453457	-0.899987	2.00996	2.42171	2.17903	16	13	9	84	152	100	Bra026044	1	-	Auxin genes	-	-	-	-
Bra034703	Bra034703.1	AT3G13130	-	unknown protein	2.53363	1.91325	211.286	7.20085e-48	6.22427e-47	0.547674	0.0394298	-0.442432	2.66155	2.58906	2.37709	37	19	13	133	171	115	Bra034703	1	-	-	-	-	-	-
Bra025253	Bra025253.1	AT3G27170	CLC-B,ATCLC-B	CLC-B (CHLORIDE CHANNEL B);anion channel/ voltage-gated chloride channel	-2.59231	1.88354	210.727	9.53182e-48	8.22688e-47	2.76111	2.36232	2.86512	0.6235	-0.178453	0.258868	180	102	144	31	23	25	Bra025253	1	-	-	-	-	-	-
Bra022401	Bra022401.1	AT2G44220	-	unknown protein	2.1163	2.25214	209.418	1.84003e-47	1.58275e-46	0.547674	0.864587	1.12823	2.71408	3.04211	2.90786	37	35	42	138	235	167	Bra022401	1	-	-	-	-	-	-
Bra004129	Bra004129.1	AT1G65800	ARK2	ARK2 (A. THALIANA RECEPTOR KINASE 2);kinase/ protein kinase/ transmembrane receptor protein serine/threonine kinase	3.00087	1.29899	209.097	2.16208e-47	1.85781e-46	-1.12741	-0.358712	-0.771293	1.85015	2.18913	2.09151	10	14	10	75	129	94	Bra004129	1	-	-	-	-	-	-
Bra006037	Bra006037.1	AT5G09876	-	unknown protein	-6.15642	0.293869	207.143	5.77103e-47	4.92972e-46	1.25782	1.4917	1.06067	-2.91251	-3.05201	-3.54139	62	55	40	1	1	0	Bra006037	1	-	-	-	-	-	-
Bra014511	Bra014511.1	AT3G60120	BGLU27	BGLU27 (BETA GLUCOSIDASE 27);catalytic/ cation binding / hydrolase,hydrolyzing O-glycosyl compounds	5.29439	0.522389	206.071	9.88777e-47	8.4251e-46	-2.34049	-3.54139	-2.8795	1.4403	1.51637	1.17809	3	0	1	56	80	49	Bra014511	1	-	-	-	-	-	-
Bra010377	Bra010377.1	AT4G28290	-	unknown protein	-4.92446	0.496986	205.836	1.1128e-46	9.47589e-46	1.59621	1.18075	1.52903	-2.91251	-2.39635	-2.51671	79	44	56	1	3	2	Bra010377	1	-	-	-	-	-	-
Bra007890	Bra007890.1	AT1G69930	ATGSTU11	ATGSTU11 (GLUTATHIONE S-TRANSFERASE TAU 11);glutathione transferase	4.1093	0.748407	205.708	1.1864e-46	1.00985e-45	-1.87932	-2.43419	-1.80647	1.41513	1.6339	1.67614	5	2	4	55	87	70	Bra007890	1	-	-	-	-	-	-
Bra030337	Bra030337.1	AT5G40240	-	nodulin MtN21 family protein	2.11206	2.08398	205.132	1.58513e-46	1.34754e-45	1.014	0.510216	0.305558	2.62908	2.70871	2.67681	52	27	23	130	186	142	Bra030337	1	-	-	-	-	-	-
Bra033275	Bra033275.1	AT1G01240	-	unknown protein	-2.56623	1.37827	204.846	1.82956e-46	1.55371e-45	2.03627	2.21607	2.30332	-0.623697	-0.178453	-0.104724	108	92	97	12	23	19	Bra033275	1	-	-	-	-	-	-
Bra002849	Bra002849.1	AT3G42850	-	galactokinase,putative	-2.06678	1.92296	204.831	1.84364e-46	1.56534e-45	2.63724	2.61668	2.55727	0.97302	0.416362	0.504538	165	122	116	40	36	30	Bra002849	1	-	-	-	-	-	-
Bra026570	Bra026570.1	AT2G02990	RNS1,ATRNS1	RNS1 (RIBONUCLEASE 1);endoribonuclease/ ribonuclease	3.38452	1.23768	204.296	2.41178e-46	2.04559e-45	-1.12741	-1.38344	-0.653145	2.02667	1.98937	2.46097	10	6	11	85	112	122	Bra026570	1	-	-	-	-	-	-
Bra013390	Bra013390.1	AT4G19370	-	unknown protein	3.05755	1.27052	204.123	2.63072e-46	2.22896e-45	-0.721478	-1.81519	-0.543945	1.99305	1.92494	2.10647	14	4	12	83	107	95	Bra013390	1	-	-	-	-	-	-
Bra040605	Bra040605.1	AT3G02840	-	immediate-early fungal elicitor family protein	-2.29648	1.59869	203.875	2.98024e-46	2.52353e-45	2.32028	2.34835	2.40216	0.332335	0.215532	-0.175343	132	101	104	25	31	18	Bra040605	1	-	-	-	-	-	-
Bra001992	Bra001992.1	AT3G11080	AtRLP35	AtRLP35 (Receptor Like Protein 35);kinase/ protein binding	2.81088	1.44012	203.772	3.13787e-46	2.65535e-45	-0.269539	-1.20798	-0.347594	2.16895	2.29488	1.9822	20	7	14	94	139	87	Bra001992	1	-	-	-	-	-	-
Bra024621	Bra024621.1	AT1G23830	-	unknown protein	2.02082	1.95521	201.355	1.057e-45	8.88547e-45	0.845101	0.406128	0.521954	2.69329	2.58906	2.49548	46	25	27	136	171	125	Bra024621	1	-	-	-	-	-	-
Bra033288	Bra033288.1	AT5G24240	-	phosphatidylinositol 3- and 4-kinase family protein / ubiquitin family protein	6.78433	0.322889	201.094	1.20515e-45	1.01204e-44	-3.54139	-3.54139	-2.8795	1.19625	1.18337	1.26065	0	0	1	47	63	52	Bra033288	1	-	-	-	-	-	-
Bra008714	Bra008714.1	AT5G15190	-	unknown protein	-2.79909	1.33703	199.11	3.26633e-45	2.72719e-44	1.95559	2.23138	2.36062	-0.428841	-0.359205	-0.691987	102	93	101	14	20	12	Bra008714	1	-	-	-	-	-	-
Bra002151	Bra002151.1	AT5G18290	SIP1%3B2,SIP1B	SIP1%3B2;water channel	2.41568	1.7592	196.629	1.13655e-44	9.40465e-44	0.510498	-0.186066	-0.174794	2.45482	2.46766	2.24812	36	16	16	115	157	105	Bra002151	1	-	-	-	-	-	-
Bra017066	Bra017066.1	AT2G39518	-	FUNCTIONS IN: molecular_function unknown;INVOLVED IN: biological_process unknown;LOCATED IN: endomembrane system;CONTAINS InterPro DOMAIN/s: Uncharacterised protein family UPF0497,trans-membrane plant (InterPro:IPR006702),Uncharacterised protein family UPF0497,trans-membrane plant subgroup (InterPro:IPR006459);BEST Arabidopsis thaliana protein match is: integral membrane protein,putative (TAIR:AT…	-2.30262	1.69734	196.526	1.19693e-44	9.90227e-44	2.59346	2.45653	2.24365	-0.0328451	0.171779	0.504538	160	109	93	19	30	30	Bra017066	1	-	-	-	-	-	-
Bra019503	Bra019503.1	AT3G47480	-	calcium-binding EF hand family protein	2.81292	1.25207	196.28	1.35418e-44	1.1194e-43	-0.635628	-0.781944	-0.543945	1.99305	2.09856	1.86393	15	10	12	83	121	80	Bra019503	1	-	-	-	-	-	-
Bra032001	Bra032001.1	AT3G03280	-	unknown protein	-3.00095	1.01986	195.828	1.69904e-44	1.4022e-43	1.71536	1.94604	1.9767	-0.623697	-0.99392	-1.18018	86	76	77	12	12	8	Bra032001	1	-	-	-	-	-	-
Bra029496	Bra029496.1	AT4G04490	-	protein kinase family protein	3.3589	0.949372	195.151	2.38812e-44	1.96809e-43	-1.3832	-1.38344	-1.19796	1.83125	1.71235	1.69605	8	6	7	74	92	71	Bra029496	1	-	-	-	-	-	-
Bra022448	Bra022448.1	AT3G19710	BCAT4	BCAT4 (BRANCHED-CHAIN AMINOTRANSFERASE4);catalytic/ methionine-oxo-acid transaminase	2.27895	1.65113	194.91	2.6961e-44	2.21921e-43	0.172569	0.234398	-0.0204941	2.22795	2.39341	2.33959	28	22	18	98	149	112	Bra022448	1	-	-	Glucosinolate genes	-	-	-
Bra027907	Bra027907.1	AT1G57750	MAH1,CYP96A15	CYP96A15 (CYTOCHROME P450 96 A1);midchain alkane hydroxylase/ oxygen binding	2.18979	1.73423	194.795	2.85544e-44	2.34942e-43	0.219399	-0.0318899	0.619083	2.41729	2.44027	2.32688	29	18	29	112	154	111	Bra027907	1	-	-	-	-	-	-
Bra014510	Bra014510.1	AT3G60140	DIN2,SRG2,BGLU30	DIN2 (DARK INDUCIBLE 2);catalytic/ cation binding / hydrolase,hydrolyzing O-glycosyl compounds	5.36196	0.580212	194.579	3.18296e-44	2.61625e-43	-3.02241	-2.88408	-2.42749	1.71233	1.22677	1.46019	1	1	2	68	65	60	Bra014510	1	-	-	-	-	-	-
Bra038796	Bra038796.1	AT4G20880	-	ethylene-responsive nuclear protein / ethylene-regulated nuclear protein (ERT2)	-2.07962	1.73268	191.845	1.25763e-43	1.02482e-42	2.52986	2.45653	2.31786	0.749652	0.257997	0.311463	153	109	98	34	32	26	Bra038796	1	-	-	-	-	-	-
Bra031721	Bra031721.1	AT1G10585	-	transcription factor	6.81126	0.637817	191.712	1.34456e-43	1.09499e-42	-3.54139	-2.09175	-3.54139	1.41513	1.42615	1.31318	0	3	0	55	75	54	Bra031721	1	-	-	-	-	-	-
Bra001078	Bra001078.1	AT3G03470	CYP89A9	CYP89A9;electron carrier/ heme binding / iron ion binding / monooxygenase/ oxygen binding	2.62181	1.36118	190.136	2.96989e-43	2.40613e-42	-0.812762	-0.106919	-0.258608	2.16895	1.93806	2.17903	13	17	15	94	108	100	Bra001078	1	-	-	-	-	-	-
Bra007629	Bra007629.1	AT2G25410	-	protein binding / zinc ion binding	2.24185	1.64122	188.898	5.53189e-43	4.4649e-42	0.172569	0.172291	0.118886	2.18393	2.40291	2.31404	28	21	20	95	150	110	Bra007629	1	-	-	-	-	-	-
Bra005565	Bra005565.1	AT2G32710	KRP4,ACK2,ICK7	KRP4;cyclin binding / cyclin-dependent protein kinase inhibitor	2.248	1.824	188.242	7.69447e-43	6.19316e-42	0.172569	0.824767	-0.0204941	2.44241	2.46766	2.38938	28	34	18	114	157	116	Bra005565	1	-	-	-	-	-	-
Bra004840	Bra004840.1	AT3G60120	BGLU27	BGLU27 (BETA GLUCOSIDASE 27);catalytic/ cation binding / hydrolase,hydrolyzing O-glycosyl compounds	6.71069	0.254309	188.198	7.86615e-43	6.3301e-42	-3.54139	-3.54139	-2.8795	0.902338	1.28953	1.14948	0	0	1	38	68	48	Bra004840	1	-	-	-	-	-	-
Bra019189	Bra019189.1	AT4G25090	-	respiratory burst oxidase,putative / NADPH oxidase,putative	2.4348	1.45808	186.969	1.45901e-42	1.16832e-41	-0.335699	0.107389	-0.258608	2.05952	2.16701	2.23456	19	20	15	87	127	104	Bra019189	1	-	-	-	-	-	-
Bra013214	Bra013214.1	AT2G04050	-	MATE efflux family protein	3.64467	0.821338	186.373	1.96837e-42	1.57342e-41	-2.34049	-1.05157	-1.57394	1.6704	1.56792	1.61468	3	8	5	66	83	67	Bra013214	1	-	-	-	-	-	-
Bra017187	Bra017187.1	AT2G37440	-	endonuclease/exonuclease/phosphatase family protein	2.63301	1.30752	185.842	2.57013e-42	2.05041e-41	-0.5546	-0.453457	-0.347594	2.12307	2.11019	1.82827	16	13	14	91	122	78	Bra017187	1	-	-	-	-	-	-
Bra034547	Bra034547.1	AT4G33090	APM1,ATAPM1	APM1 (AMINOPEPTIDASE M1);aminopeptidase	3.43645	0.943277	185.093	3.74546e-42	2.97931e-41	-1.5304	-1.05157	-1.57394	1.46503	1.84362	1.86393	7	8	5	57	101	80	Bra034547	1	-	-	-	-	-	-
Bra024248	Bra024248.1	AT5G63920	-	DNA topoisomerase III alpha,putative	2.86015	1.13481	184.34	5.46963e-42	4.34315e-41	-0.477883	-1.20798	-0.899987	1.95863	1.8575	1.84621	17	7	9	81	102	79	Bra024248	1	-	-	-	-	-	-
Bra035707	Bra035707.1	AT5G40170	AtRLP54	AtRLP54 (Receptor Like Protein 54);kinase/ protein binding	3.68524	0.888891	183.286	9.28947e-42	7.35419e-41	-2.34049	-1.58322	-0.899987	1.60514	1.6339	1.69605	3	5	9	63	87	71	Bra035707	1	-	-	-	-	-	-
Bra037934	Bra037934.1	AT5G50200	WR3	WR3 (WOUND-RESPONSIVE 3);nitrate transmembrane transporter	2.22579	1.6079	182.495	1.38221e-41	1.09137e-40	-0.145678	0.172291	0.417809	2.19875	2.31514	2.3011	22	21	25	96	141	109	Bra037934	1	-	-	-	-	-	-
Bra026456	Bra026456.1	AT4G26200	ACS7,ATACS7	ACS7;1-aminocyclopropane-1-carboxylate synthase	-4.20521	0.511284	180.613	3.56127e-41	2.79456e-40	1.63127	1.41332	1.19277	-2.47601	-2.15438	-1.92362	81	52	44	2	4	4	Bra026456	1	-	-	-	-	-	-
Bra032218	Bra032218.1	AT2G19050	-	GDSL-motif lipase/hydrolase family protein	-3.75509	0.554479	180.57	3.63847e-41	2.85294e-40	1.52344	1.38622	1.45202	-2.14135	-1.60522	-1.92362	75	51	53	3	7	4	Bra032218	1	-	-	-	-	-	-
Bra000330	Bra000330.1	AT2G43820	GT,UGT74F2	UGT74F2 (UDP-GLUCOSYLTRANSFERASE 74F2);UDP-glucose:4-aminobenzoate acylglucosyltransferase/ UDP-glucosyltransferase/ UDP-glycosyltransferase/ transferase,transferring glycosyl groups / transferase,transferring hexosyl groups	5.91543	0.262713	179.619	5.86841e-41	4.57938e-40	-2.64153	-3.54139	-3.54139	0.938112	1.30986	1.09051	2	0	0	39	69	46	Bra000330	1	-	-	-	-	-	-
Bra031142	Bra031142.1	AT2G20835	-	unknown protein	-2.41001	1.98149	179.478	6.30102e-41	4.91321e-40	2.56655	2.65124	2.44253	0.277536	-0.493655	0.931574	157	125	107	24	18	41	Bra031142	1	-	-	-	-	-	-
Bra030216	Bra030216.1	AT1G13080	CYP71B2	CYP71B2 (CYTOCHROME P450 71B2);electron carrier/ heme binding / iron ion binding / monooxygenase/ oxygen binding	5.88797	0.238336	179.037	7.86455e-41	6.12063e-40	-3.02241	-2.88408	-3.54139	1.25416	0.995361	1.12029	1	1	0	49	55	47	Bra030216	1	-	-	-	-	-	-
Bra000512	Bra000512.1	-	-	-	-2.00745	2.18913	178.757	9.05382e-41	7.04215e-40	2.67132	2.93923	2.86512	0.708815	1.26891	0.63408	169	153	144	33	67	33	Bra000512	1	-	-	-	-	-	-
Bra021124	Bra021124.1	AT3G15650	-	phospholipase/carboxylesterase family protein	2.87671	1.45177	178.568	9.95447e-41	7.73677e-40	-1.01473	-0.106919	-0.347594	1.99305	2.5122	2.22088	11	17	14	83	162	103	Bra021124	1	-	-	-	-	-	-
Bra033075	Bra033075.1	AT3G28960	-	amino acid transporter family protein	3.3671	0.820644	178.348	1.11217e-40	8.63572e-40	-1.69433	-1.20798	-1.37374	1.71233	1.66579	1.43671	6	7	6	68	89	59	Bra033075	1	-	-	-	-	-	-
Bra017580	Bra017580.1	AT5G46080	-	protein kinase family protein	2.07128	1.7282	178.146	1.23076e-40	9.54921e-40	0.308731	0.293942	0.521954	2.39171	2.26396	2.48406	31	23	27	110	136	124	Bra017580	1	-	-	-	-	-	-
Bra003009	Bra003009.1	AT5G54160	ATOMT1,OMT1	ATOMT1 (O-METHYLTRANSFERASE 1);caffeate O-methyltransferase/ myricetin 3'-O-methyltransferase/ quercetin 3-O-methyltransferase	3.6801	0.686166	177.487	1.71459e-40	1.32804e-39	-1.5304	-1.58322	-2.42749	1.55993	1.40741	1.55048	7	5	2	61	74	64	Bra003009	1	-	-	-	-	-	-
Bra024825	Bra024825.1	AT2G02230	AtPP2-B1	AtPP2-B1 (Phloem protein 2-B1);carbohydrate binding	-2.21769	1.80351	176.494	2.82507e-40	2.18028e-39	2.84563	2.4951	2.46883	0.749652	0.299248	0.311463	191	112	109	34	33	26	Bra024825	1	-	-	-	-	-	-
Bra025072	Bra025072.1	AT5G45540	-	unknown protein	-2.49571	1.21446	175.318	5.10304e-40	3.91975e-39	1.96935	1.90844	2.11634	-0.257198	-0.722211	-0.104724	103	74	85	16	15	19	Bra025072	1	-	-	-	-	-	-
Bra022117	Bra022117.1	AT3G13180	-	NOL1/NOP2/sun family protein / antitermination NusB domain-containing protein	-3.40425	0.822805	174.502	7.68956e-40	5.88872e-39	1.82541	1.88926	1.37067	-1.44439	-1.32896	-1.33326	93	73	50	6	9	7	Bra022117	1	-	-	-	-	-	-
Bra025488	Bra025488.1	AT5G39030	-	protein kinase family protein	2.37118	1.61773	174.046	9.67386e-40	7.40135e-39	0.219399	0.0394298	-0.174794	2.05952	2.33511	2.51803	29	19	16	87	143	127	Bra025488	1	-	-	-	-	-	-
Bra001986	Bra001986.1	AT5G42180	-	peroxidase 64 (PER64) (P64) (PRXR4)	-2.59949	1.12243	173.98	1.00007e-39	7.65e-39	2.00988	1.90844	1.80154	-0.257198	-0.897551	-0.410661	106	74	68	16	13	15	Bra001986	1	-	-	-	-	-	-
Bra013706	Bra013706.1	AT4G23530	-	unknown protein	-2.5316	1.25524	171.292	3.8643e-39	2.93008e-38	2.197	1.88926	1.95825	-0.0328451	-0.296404	-0.915531	121	73	76	19	21	10	Bra013706	1	-	-	-	-	-	-
Bra029811	Bra029811.1	AT3G10020	-	unknown protein	-5.50386	0.525516	167.149	3.10366e-38	2.32646e-37	1.46634	1.33044	1.09485	-3.54139	-3.05201	-1.18018	72	49	41	0	1	8	Bra029811	1	-	-	-	-	-	-
Bra001761	Bra001761.1	AT3G19710	BCAT4	BCAT4 (BRANCHED-CHAIN AMINOTRANSFERASE4);catalytic/ methionine-oxo-acid transaminase	3.24396	1.05345	166.202	4.99661e-38	3.73507e-37	-1.01473	-1.05157	-1.37374	1.62722	2.13319	1.81011	11	8	6	64	124	77	Bra001761	1	-	-	Glucosinolate genes	-	-	-
Bra003450	Bra003450.1	AT3G61460	BRH1	BRH1 (BRASSINOSTEROID-RESPONSIVE RING-H2);protein binding / zinc ion binding	2.72633	1.10199	166.072	5.33375e-38	3.9827e-37	-0.910214	-0.453457	-0.771293	1.92337	1.66579	1.94939	12	13	10	79	89	85	Bra003450	1	-	-	-	-	-	-
Bra039857	Bra039857.1	AT3G50710	-	F-box family protein	2.62276	1.30998	165.936	5.71332e-38	4.26299e-37	-0.910214	-0.0318899	-0.347594	2.29846	2.01436	1.88143	12	18	14	103	114	81	Bra039857	1	-	-	-	-	-	-
Bra032058	Bra032058.1	AT1G74180	AtRLP14	AtRLP14 (Receptor Like Protein 14);protein binding	3.16511	0.905408	165.858	5.94048e-38	4.43167e-37	-1.3832	-1.20798	-1.04129	1.41513	1.81547	1.73508	8	7	8	55	99	73	Bra032058	1	-	-	-	-	-	-
Bra022699	Bra022699.1	AT5G54145	-	unknown protein	2.16126	1.53501	165.773	6.20108e-38	4.62439e-37	0.124168	0.45911	-0.347594	2.28463	2.15582	2.15044	27	26	14	102	126	98	Bra022699	1	-	-	-	-	-	-
Bra002697	Bra002697.1	AT5G57780	-	EXPRESSED IN: 18 plant structures;EXPRESSED DURING: 12 growth stages;BEST Arabidopsis thaliana protein match is: transcription factor (TAIR:AT4G30410.2);Has 70 Blast hits to 70 proteins in 6 species: Archae - 0;Bacteria - 0;Metazoa - 0;Fungi - 0;Plants - 70;Viruses - 0;Other Eukaryotes - 0 (source: NCBI BLink).	2.54743	1.44315	165.772	6.20464e-38	4.6262e-37	-0.40504	0.0394298	-0.347594	2.39171	1.93806	2.22088	18	19	14	110	108	103	Bra002697	1	-	-	-	-	-	-
Bra033071	Bra033071.1	AT3G28930	AIG2	AIG2 (AVRRPT2-INDUCED GENE 2)	2.54279	1.19908	165.179	8.36037e-38	6.22325e-37	-0.269539	-0.554863	-0.771293	1.75306	1.96394	1.9822	20	12	10	70	110	87	Bra033071	1	-	-	-	-	-	-
Bra021645	Bra021645.1	AT5G03495	-	nucleotide binding	3.54422	0.743119	164.714	1.05647e-37	7.85689e-37	-1.69433	-1.81519	-1.37374	1.51326	1.36918	1.77309	6	4	6	59	72	75	Bra021645	1	-	-	-	-	-	-
Bra008008	Bra008008.1	AT1G72110	-	unknown protein	5.31994	0.19284	164.65	1.091e-37	8.1093e-37	-2.64153	-3.54139	-2.8795	0.902338	1.1157	1.12029	2	0	1	38	60	47	Bra008008	1	-	-	-	-	-	-
Bra038608	Bra038608.1	AT5G63130	-	octicosapeptide/Phox/Bem1p (PB1) domain-containing protein	-2.3307	1.58197	162.764	2.81628e-37	2.08379e-36	2.18525	2.15316	2.3746	0.220573	-0.99392	0.204282	120	88	102	23	12	24	Bra038608	1	-	-	-	-	-	-
Bra009052	Bra009052.1	AT5G10180	AST68,SULTR2%3B1	AST68;sulfate transmembrane transporter	-2.02162	1.72975	162.602	3.05614e-37	2.26003e-36	2.63724	2.29105	2.3746	0.532821	0.559051	0.362208	165	97	102	29	40	27	Bra009052	1	-	-	-	-	-	-
Bra011933	Bra011933.1	AT2G28680	-	cupin family protein	-2.49747	1.2184	161.792	4.59385e-37	3.38427e-36	2.18525	1.90844	1.82208	-0.257198	-0.493655	-0.327883	120	74	69	16	18	16	Bra011933	1	-	-	-	-	-	-
Bra014379	Bra014379.1	AT3G62960	-	glutaredoxin family protein	2.12427	2.42349	161.287	5.92337e-37	4.35347e-36	1.44679	0.293942	0.795684	3.03636	2.95444	2.75484	71	23	33	173	221	150	Bra014379	1	-	-	-	-	-	-
Bra018521	Bra018521.1	AT4G03070	AOP1,AOP,AOP1.1	AOP1;oxidoreductase,acting on paired donors,with incorporation or reduction of molecular oxygen,2-oxoglutarate as one donor,and incorporation of one atom each of oxygen into both donors	2.40755	1.29515	159.859	1.21471e-36	8.88595e-36	-0.0875197	-0.910466	-0.174794	2.10744	1.84362	2.01429	23	9	16	90	101	89	Bra018521	1	-	-	Glucosinolate genes	-	-	-
Bra030203	Bra030203.1	AT2G22790	-	unknown protein	-2.26178	1.27945	158.64	2.24314e-36	1.63387e-35	2.00988	2.16914	1.88202	-0.257198	-0.069421	-0.104724	106	89	72	16	25	19	Bra030203	1	-	-	-	-	-	-
Bra027588	Bra027588.1	AT5G45100	-	protein binding / zinc ion binding	2.61184	1.08228	157.556	3.87024e-36	2.80898e-35	-1.01473	-0.358712	-0.543945	1.8121	1.81547	1.77309	11	14	12	73	99	75	Bra027588	1	-	-	-	-	-	-
Bra025798	Bra025798.1	AT1G20160	ATSBT5.2	ATSBT5.2;identical protein binding / serine-type endopeptidase	2.36992	1.26939	157.252	4.5082e-36	3.26909e-35	-0.0875197	-0.358712	-0.543945	1.95863	2.02669	1.86393	23	14	12	81	115	80	Bra025798	1	-	-	-	-	-	-
Bra025357	Bra025357.1	AT3G28850	-	glutaredoxin family protein	5.25915	0.138034	157.054	4.98172e-36	3.60924e-35	-2.64153	-2.88408	-3.54139	0.865655	0.970039	1.14948	2	1	0	37	54	48	Bra025357	1	-	-	-	-	-	-
Bra032474	Bra032474.1	AT1G05260	RCI3,RCI3A	RCI3 (RARE COLD INDUCIBLE GENE 3);peroxidase	-2.61237	0.967061	156.694	5.96984e-36	4.31821e-35	1.85537	1.8099	1.57817	-0.976457	-0.359205	-0.915531	95	69	58	9	20	10	Bra032474	1	-	-	-	-	-	-
Bra016169	Bra016169.1	AT1G71000	-	heat shock protein binding	2.60409	1.16393	155.831	9.21779e-36	6.64749e-35	-0.40504	-0.66394	-0.653145	1.75306	1.82961	2.13593	18	11	11	70	100	97	Bra016169	1	-	-	-	-	-	-
Bra021580	Bra021580.1	AT3G14850	-	unknown protein	3.78271	0.667764	155.79	9.4109e-36	6.78315e-35	-2.09155	-2.43419	-1.04129	1.41513	1.30986	1.52844	4	2	8	55	69	63	Bra021580	1	-	-	-	-	-	-
Bra010611	Bra010611.1	AT4G37770	ACS8	ACS8;1-aminocyclopropane-1-carboxylate synthase	-2.87009	0.77554	155.042	1.37118e-35	9.86564e-35	1.71536	1.46605	1.57817	-0.731975	-1.09719	-1.33326	86	54	58	11	11	7	Bra010611	1	-	-	-	-	-	-
Bra000247	Bra000247.1	AT2G41960	-	unknown protein	2.58832	1.06218	153.449	3.05666e-35	2.18767e-34	-0.635628	-0.910466	-0.442432	1.6704	1.9117	1.69605	15	9	13	66	106	71	Bra000247	1	-	-	-	-	-	-
Bra033984	Bra033984.1	AT3G59700	ATHLECRK,LECRK1	ATHLECRK (ARABIDOPSIS THALIANA LECTIN-RECEPTOR KINASE);kinase	-6.45195	-0.15862	153.056	3.7247e-35	2.66251e-34	0.959866	0.559572	0.836652	-3.54139	-3.05201	-3.54139	50	28	34	0	1	0	Bra033984	1	-	-	-	-	-	-
Bra011438	Bra011438.1	AT4G33420	-	peroxidase,putative	-2.04672	1.44027	152.132	5.92788e-35	4.22256e-34	2.10023	2.31998	2.0129	0.220573	0.171779	0.14755	113	99	79	23	30	23	Bra011438	1	-	-	-	-	-	-
Bra013227	Bra013227.1	AT3G25180	CYP82G1	CYP82G1;electron carrier/ heme binding / iron ion binding / monooxygenase/ oxygen binding	-2.43895	1.11306	151.113	9.90082e-35	7.02308e-34	1.89918	2.05331	1.67171	-0.257198	-0.807219	-0.175343	98	82	62	16	14	18	Bra013227	1	-	-	-	-	-	-
Bra019256	Bra019256.1	AT4G23930	-	FUNCTIONS IN: molecular_function unknown;INVOLVED IN: biological_process unknown;LOCATED IN: endomembrane system;EXPRESSED IN: 11 plant structures;EXPRESSED DURING: 6 growth stages;CONTAINS InterPro DOMAIN/s: Harpin-induced 1 (InterPro:IPR010847);BEST Arabidopsis thaliana protein match is: proline-rich family protein (TAIR:AT1G64450.1);Has 183 Blast hits to 177 proteins in 15 species: Archae - 0;…	2.10815	1.50913	150.688	1.22613e-34	8.68837e-34	0.308731	0.234398	-0.442432	2.16895	2.06307	2.20706	31	22	13	94	118	102	Bra019256	1	-	-	-	-	-	-
Bra006818	Bra006818.1	AT5G57480	-	AAA-type ATPase family protein	2.64237	0.991489	149.961	1.76772e-34	1.24848e-33	-0.721478	-0.910466	-0.653145	1.6704	1.72754	1.73508	14	9	11	66	93	73	Bra006818	1	-	-	-	-	-	-
Bra001349	Bra001349.1	AT3G08660	-	phototropic-responsive protein,putative	2.29687	1.2653	149.788	1.92869e-34	1.3617e-33	-0.335699	-0.106919	-0.258608	1.83125	1.95106	2.03006	19	17	15	74	109	90	Bra001349	1	-	-	-	-	-	-
Bra016539	Bra016539.1	AT1G18830	-	transducin family protein / WD-40 repeat family protein	-3.47801	0.406408	148.194	4.30243e-34	3.02188e-33	1.44679	1.21195	1.12823	-1.44439	-2.39635	-1.50453	71	45	42	6	3	6	Bra016539	1	-	-	-	-	-	-
Bra004128	Bra004128.1	AT1G65780	-	tRNA-splicing endonuclease positive effector-related	2.4651	1.10128	147.487	6.14154e-34	4.29876e-33	-0.477883	-0.66394	-0.442432	1.69152	1.92494	1.73508	17	11	13	67	107	73	Bra004128	1	-	-	-	-	-	-
Bra031918	Bra031918.1	AT5G64430	-	octicosapeptide/Phox/Bem1p (PB1) domain-containing protein	2.11533	1.41234	147.018	7.77779e-34	5.42911e-33	-0.206279	-0.0318899	0.362775	2.12307	2.08683	1.96589	21	18	24	91	120	86	Bra031918	1	-	-	-	-	-	-
Bra001549	Bra001549.1	AT3G14395	-	unknown protein	2.92906	0.814437	146.836	8.52251e-34	5.94283e-33	-1.24964	-0.781944	-1.37374	1.36345	1.71235	1.55048	9	10	6	53	92	64	Bra001549	1	-	-	-	-	-	-
Bra032601	Bra032601.1	AT1G02450	NIMIN1,NIMIN-1	NIMIN1 (NIM1-INTERACTING 1);protein binding	2.01343	1.55605	146.733	8.97796e-34	6.25827e-33	0.219399	0.234398	0.305558	2.16895	2.32516	2.01429	29	22	23	94	142	89	Bra032601	1	-	-	-	-	-	-
Bra029817	Bra029817.1	AT3G10120	-	unknown protein	2.76611	1.06952	146.46	1.02981e-33	7.17359e-33	-0.635628	-0.554863	-1.80647	1.92337	1.5847	1.82827	15	12	4	79	84	78	Bra029817	1	-	-	-	-	-	-
Bra039328	Bra039328.1	AT2G45570	CYP76C2	CYP76C2;electron carrier/ heme binding / iron ion binding / monooxygenase/ oxygen binding	4.84128	0.10988	146.103	1.23276e-33	8.57115e-33	-2.64153	-2.88408	-2.8795	1.1664	0.944265	0.752942	2	1	1	46	53	36	Bra039328	1	-	-	-	-	-	-
Bra004833	Bra004833.1	AT3G60120	BGLU27	BGLU27 (BETA GLUCOSIDASE 27);catalytic/ cation binding / hydrolase,hydrolyzing O-glycosyl compounds	3.54471	0.5018	145.536	1.63954e-33	1.13665e-32	-2.64153	-1.38344	-1.57394	1.28227	1.28953	1.28716	2	6	5	50	68	53	Bra004833	1	-	-	-	-	-	-
Bra027453	Bra027453.1	AT5G03610	-	GDSL-motif lipase/hydrolase family protein	-2.92299	0.670578	144.72	2.47293e-33	1.70714e-32	1.40689	1.46605	1.6257	-1.271	-1.60522	-0.691987	69	54	60	7	7	12	Bra027453	1	-	-	-	-	-	-
Bra036114	Bra036114.1	AT5G28020	CYSD2,ATCYSD2	CYSD2 (CYSTEINE SYNTHASE D2);catalytic/ cysteine synthase/ pyridoxal phosphate binding	-2.40472	1.27388	144.618	2.60236e-33	1.79558e-32	2.18525	1.85013	1.90146	-0.623697	0.126658	-0.498479	120	71	73	12	29	14	Bra036114	1	-	-	-	-	-	-
Bra034865	Bra034865.1	AT3G11110	-	zinc finger (C3HC4-type RING finger) family protein	5.88255	0.239427	144.335	3.00194e-33	2.06952e-32	-2.64153	-3.54139	-3.54139	0.708815	1.40741	1.06009	2	0	0	33	74	45	Bra034865	1	-	-	-	-	-	-
Bra037468	Bra037468.1	AT3G44713	-	unknown protein	-4.0207	0.44418	143.841	3.84879e-33	2.64751e-32	1.54198	1.33044	0.989795	-1.44439	-2.15438	-2.93993	76	49	38	6	4	1	Bra037468	1	-	-	-	-	-	-
Bra004057	Bra004057.1	AT3G45140	LOX2,ATLOX2	LOX2 (LIPOXYGENASE 2);lipoxygenase	2.09759	1.5276	143.173	5.38689e-33	3.69803e-32	0.0740859	0.293942	0.118886	1.95863	2.34499	2.13593	26	23	20	81	144	97	Bra004057	1	-	-	-	-	-	-
Bra035544	Bra035544.1	AT3G02020	AK3	AK3 (ASPARTATE KINASE 3);aspartate kinase	2.23703	1.24365	141.841	1.0534e-32	7.19866e-32	-0.40504	-0.0318899	-0.174794	1.8688	1.95106	1.89872	18	18	16	76	109	82	Bra035544	1	-	-	-	-	-	-
Bra025884	Bra025884.1	AT1G21250	WAK1,PRO25	WAK1 (CELL WALL-ASSOCIATED KINASE);kinase	3.25447	0.573307	141.371	1.33499e-32	9.11072e-32	-1.69433	-1.58322	-1.37374	1.46503	1.16116	1.46019	6	5	6	57	62	60	Bra025884	1	-	-	-	-	-	-
Bra019592	Bra019592.1	AT2G27420	-	cysteine proteinase,putative	3.93895	0.319324	140.839	1.74524e-32	1.18827e-31	-2.64153	-2.43419	-1.57394	1.19625	0.944265	1.26065	2	2	5	47	53	52	Bra019592	1	-	-	-	-	-	-
Bra030915	Bra030915.1	AT1G54010	-	myrosinase-associated protein,putative	-2.36661	1.0572	140.581	1.98661e-32	1.35147e-31	1.85537	1.76852	1.75954	-0.428841	-0.122907	-1.0418	95	67	66	14	24	9	Bra030915	1	-	-	-	-	-	-
Bra012384	Bra012384.1	AT1G23730	ATBCA3,BCA3	BCA3 (BETA CARBONIC ANHYDRASE 4);carbonate dehydratase/ zinc ion binding	4.78697	0.0605901	139.859	2.85745e-32	1.93806e-31	-2.64153	-3.54139	-2.42749	0.97302	0.995361	0.714399	2	0	2	40	55	35	Bra012384	1	-	-	-	-	-	-
Bra027957	Bra027957.1	AT1G54890	-	late embryogenesis abundant protein-related / LEA protein-related	2.66473	0.883666	139.701	3.09488e-32	2.09771e-31	-0.477883	-1.05157	-1.37374	1.51326	1.53376	1.77309	17	8	6	59	81	75	Bra027957	1	-	-	-	-	-	-
Bra031666	Bra031666.1	AT1G09500	-	cinnamyl-alcohol dehydrogenase family / CAD family	-2.02172	1.34585	139.439	3.53043e-32	2.39053e-31	2.03627	2.13699	1.95825	-0.178473	0.171779	0.258868	108	87	76	17	30	25	Bra031666	1	-	-	-	-	-	-
Bra000079	Bra000079.1	AT2G38640	-	unknown protein	2.08391	1.36483	138.906	4.61911e-32	3.11836e-31	0.022203	-0.186066	0.183831	1.95863	2.09856	1.93269	25	16	21	81	121	84	Bra000079	1	-	-	-	-	-	-
Bra037700	Bra037700.1	AT1G70250	-	receptor serine/threonine kinase,putative	6.32761	0.124587	138.846	4.75859e-32	3.21039e-31	-3.54139	-3.54139	-2.42749	0.749652	0.918022	0.997262	0	0	2	34	52	43	Bra037700	1	-	-	-	-	-	-
Bra005081	Bra005081.1	AT2G38790	-	unknown protein	-3.71796	0.206298	138.386	6.00177e-32	4.04307e-31	1.14106	1.01371	1.12823	-2.91251	-1.76611	-1.92362	57	39	42	1	6	4	Bra005081	1	-	-	-	-	-	-
Bra013434	Bra013434.1	AT4G19970	-	unknown protein	3.33919	0.479316	137.919	7.59195e-32	5.10838e-31	-1.24964	-2.09175	-2.08382	1.13591	1.20523	1.43671	9	3	3	45	64	59	Bra013434	1	-	-	-	-	-	-
Bra000651	Bra000651.1	AT4G08555	-	unknown protein	-8.03397	-0.39537	137.892	7.69401e-32	5.17619e-31	0.619269	0.510216	0.571336	-3.54139	-3.54139	-3.54139	39	27	28	0	0	0	Bra000651	1	-	-	-	-	-	-
Bra026868	Bra026868.1	AT1G13970	-	unknown protein	2.34367	1.2393	136.704	1.39959e-31	9.37706e-31	-0.5546	-0.269808	0.0508783	2.24233	1.88485	1.82827	16	15	19	99	104	78	Bra026868	1	-	-	-	-	-	-
Bra018208	Bra018208.1	-	-	-	3.98924	0.310876	136.089	1.90826e-31	1.27557e-30	-2.09155	-3.54139	-1.80647	1.28227	1.13861	0.862752	4	0	4	50	61	39	Bra018208	1	-	-	-	-	-	-
Bra029019	Bra029019.1	AT5G54585	-	unknown protein	4.43525	0.277059	135.898	2.10076e-31	1.40217e-30	-3.54139	-1.81519	-2.42749	0.828014	1.1157	1.14948	0	4	2	36	60	48	Bra029019	1	-	-	-	-	-	-
Bra025662	Bra025662.1	AT5G38080	-	unknown protein	-3.09976	0.468007	135.776	2.2334e-31	1.48924e-30	1.25782	1.51691	1.16086	-0.976457	-1.60522	-1.92362	62	56	43	9	7	4	Bra025662	1	-	-	-	-	-	-
Bra005623	Bra005623.1	AT2G31945	-	unknown protein	-3.01811	0.526857	135.538	2.51766e-31	1.67768e-30	1.1889	1.41332	1.52903	-1.86989	-1.46049	-0.915531	59	52	56	4	8	10	Bra005623	1	-	-	-	-	-	-
Bra027842	Bra027842.1	AT1G59670	ATGSTU15	ATGSTU15 (GLUTATHIONE S-TRANSFERASE TAU 15);glutathione transferase	2.55077	0.954855	134.179	4.99269e-31	3.31177e-30	-0.721478	-0.554863	-0.899987	1.8688	1.64993	1.46019	14	12	9	76	88	60	Bra027842	1	-	-	-	-	-	-
Bra034594	Bra034594.1	AT4G33970	-	protein binding / structural constituent of cell wall	-2.59493	0.914333	133.533	6.91182e-31	4.57286e-30	1.46634	1.85013	1.84234	-0.976457	-0.722211	-0.498479	72	71	70	9	15	14	Bra034594	1	-	-	-	-	-	-
Bra026718	Bra026718.1	AT1G16500	-	unknown protein	2.23315	1.1583	133.09	8.6414e-31	5.70232e-30	0.022203	-0.554863	-0.543945	1.83125	1.74257	1.91581	25	12	12	74	94	83	Bra026718	1	-	-	-	-	-	-
Bra027307	Bra027307.1	AT3G14840	-	leucine-rich repeat family protein / protein kinase family protein	3.94409	0.184089	131.349	2.07639e-30	1.36003e-29	-2.34049	-2.88408	-1.80647	0.938112	1.06876	0.964792	3	1	4	39	58	42	Bra027307	1	-	-	-	-	-	-
Bra007212	Bra007212.1	AT3G56060	-	glucose-methanol-choline (GMC) oxidoreductase family protein	2.97939	0.620771	131.277	2.15398e-30	1.4104e-29	-1.12741	-1.58322	-1.37374	1.33689	1.22677	1.5722	10	5	6	52	65	65	Bra007212	1	-	-	-	-	-	-
Bra016070	Bra016070.1	AT1G72290	-	trypsin and protease inhibitor family protein / Kunitz family protein	6.23021	0.050567	130.895	2.61115e-30	1.70563e-29	-3.54139	-2.43419	-3.54139	0.789365	0.836302	0.827069	0	2	0	35	49	38	Bra016070	1	-	-	-	-	-	-
Bra031090	Bra031090.1	AT2G19590	ACO1	ACO1 (ACC OXIDASE 1);1-aminocyclopropane-1-carboxylate oxidase	2.57461	1.19625	130.829	2.69893e-30	1.76212e-29	-0.5546	-0.453457	-0.347594	2.31215	1.71235	1.99833	16	13	14	104	92	88	Bra031090	1	-	-	-	-	-	-
Bra019025	Bra019025.1	AT4G27810	-	unknown protein	3.04749	0.544107	130.16	3.78066e-30	2.46482e-29	-1.12741	-1.81519	-1.57394	1.36345	1.40741	1.09051	10	4	5	53	74	46	Bra019025	1	-	-	-	-	-	-
Bra003682	Bra003682.1	AT1G77520	-	O-methyltransferase family 2 protein	-2.01338	1.5562	128.467	8.87128e-30	5.7441e-29	1.9965	2.4951	2.3746	0.220573	0.592622	0.204282	105	112	102	23	41	24	Bra003682	1	-	-	-	-	-	-
Bra019800	Bra019800.1	AT1G12930	-	importin-related	-4.11684	-0.0265291	128.336	9.4753e-30	6.13227e-29	0.959866	0.698255	0.953006	-2.91251	-1.94722	-2.93993	50	31	37	1	5	1	Bra019800	1	-	-	-	-	-	-
Bra004004	Bra004004.1	AT1G69260	AFP1	AFP1 (ABI FIVE BINDING PROTEIN)	-2.20745	1.03945	128.29	9.69913e-30	6.27514e-29	1.71536	1.96449	1.6257	-0.623697	-0.122907	-0.327883	86	77	60	12	24	16	Bra004004	1	-	-	-	-	-	-
Bra030958	Bra030958.1	AT5G55880	-	unknown protein	3.25993	0.410985	127.727	1.28787e-29	8.30851e-29	-1.69433	-1.38344	-2.08382	1.28227	1.248	0.997262	6	6	3	50	66	43	Bra030958	1	-	-	-	-	-	-
Bra029472	Bra029472.1	AT1G64590	-	short-chain dehydrogenase/reductase (SDR) family protein	2.18106	1.14458	127.183	1.69401e-29	1.09044e-28	-0.40504	-0.0318899	-0.347594	1.79269	1.71235	1.91581	18	18	14	72	92	83	Bra029472	1	-	-	-	-	-	-
Bra007050	Bra007050.1	AT3G54140	ATPTR1,PTR1	PTR1 (PEPTIDE TRANSPORTER 1);dipeptide transporter/ transporter/ tripeptide transporter	3.73686	0.475566	127.13	1.74009e-29	1.11922e-28	-1.5304	-2.09175	-2.42749	1.28227	1.09242	1.7157	7	3	2	50	59	72	Bra007050	1	-	-	-	-	-	-
Bra000513	Bra000513.1	-	-	-	-2.31992	1.31211	126.976	1.87986e-29	1.20798e-28	2.00988	2.24653	1.75954	-0.522982	0.257997	-0.410661	106	94	66	13	32	15	Bra000513	1	-	-	-	-	-	-
Bra026690	Bra026690.1	AT1G17080	-	unknown protein	3.56252	0.263984	126.19	2.79399e-29	1.78888e-28	-1.87932	-2.09175	-2.08382	1.13591	1.06876	0.964792	5	3	3	45	58	42	Bra026690	1	-	-	-	-	-	-
Bra033136	Bra033136.1	AT3G15740	-	zinc finger (C3HC4-type RING finger) family protein	2.46434	0.883305	126.042	3.01103e-29	1.92724e-28	-0.477883	-0.66394	-1.19796	1.55993	1.69699	1.43671	17	11	7	61	91	59	Bra033136	1	-	-	-	-	-	-
Bra023665	Bra023665.1	AT5G18130	-	unknown protein	2.11105	1.19511	125.483	3.9898e-29	2.5469e-28	-0.335699	0.107389	-0.258608	1.79269	1.74257	1.99833	19	20	15	72	94	88	Bra023665	1	-	-	-	-	-	-
Bra039700	Bra039700.1	AT1G53885	-	senescence-associated protein-related	-2.20253	1.00907	125.394	4.17385e-29	2.66355e-28	1.68231	1.76852	1.78069	-0.623697	-0.236224	-0.249598	84	67	67	12	22	17	Bra039700	1	-	-	-	-	-	-
Bra000170	Bra000170.1	AT2G40140	CZF1,ZFAR1,SZF2,ATSZF2	CZF1;transcription factor	-2.70051	0.589671	124.731	5.82748e-29	3.71068e-28	1.34488	1.30172	1.52903	-0.976457	-1.46049	-0.799434	66	48	56	9	8	11	Bra000170	1	-	-	-	-	-	-
Bra016591	Bra016591.1	AT1G17710	-	phosphatase	3.16894	0.418631	124.354	7.04699e-29	4.48229e-28	-1.3832	-2.43419	-1.37374	0.97302	1.20523	1.33875	8	2	6	40	64	55	Bra016591	1	-	-	-	-	-	-
Bra000340	Bra000340.1	AT2G44080	ARL	ARL (ARGOS-LIKE)	2.52232	0.809005	123.373	1.15529e-28	7.31517e-28	-1.12741	-0.781944	-0.543945	1.46503	1.60129	1.43671	10	10	12	57	85	59	Bra000340	1	-	-	-	-	-	-
Bra029663	Bra029663.1	AT3G07600	-	heavy-metal-associated domain-containing protein	2.2551	1.02747	122.948	1.43158e-28	9.04632e-28	-0.269539	-0.910466	-0.258608	1.77301	1.71235	1.5936	20	9	15	71	92	66	Bra029663	1	-	-	-	-	-	-
Bra018885	Bra018885.1	AT1G49340	ATPI4K ALPHA	ATPI4K ALPHA;1-phosphatidylinositol 4-kinase/ inositol or phosphatidylinositol kinase	2.50882	1.06598	122.491	1.80251e-28	1.13761e-27	-0.40504	-1.58322	-0.442432	1.55993	1.9117	1.63546	18	5	13	61	106	68	Bra018885	1	-	-	-	-	-	-
Bra012188	Bra012188.1	AT1G19840	-	auxin-responsive family protein	3.27322	0.331493	121.015	3.79276e-28	2.37932e-27	-1.5304	-2.43419	-1.57394	1.2255	1.04471	1.06009	7	2	5	48	57	45	Bra012188	1	-	Auxin genes	-	-	-	-
Bra005384	Bra005384.1	AT2G34890	-	CTP synthase,putative / UTP--ammonia ligase,putative	-4.45553	-0.147665	120.301	5.43604e-28	3.39868e-27	0.987186	0.559572	0.665301	-2.91251	-2.68725	-2.51671	51	28	30	1	2	2	Bra005384	1	-	-	-	-	-	-
Bra008338	Bra008338.1	AT1G77885	-	unknown protein	-2.55403	1.08944	120.299	5.44057e-28	3.40098e-27	2.08766	1.8099	1.55381	-0.428841	-0.296404	-1.33326	112	69	57	14	21	7	Bra008338	1	-	-	-	-	-	-
Bra009300	Bra009300.1	AT5G07010	ATST2A,ST2A	ST2A (SULFOTRANSFERASE 2A);hydroxyjasmonate sulfotransferase/ sulfotransferase	3.33844	0.289243	119.974	6.40812e-28	3.99722e-27	-1.87932	-2.09175	-1.57394	0.97302	1.16116	1.02902	5	3	5	40	62	44	Bra009300	1	-	-	-	-	-	-
Bra039335	Bra039335.1	AT2G45470	FLA8,AGP8	FLA8 (FASCICLIN-LIKE ARABINOGALACTAN PROTEIN 8)	2.74069	0.599523	117.63	2.08918e-27	1.29091e-26	-0.812762	-1.20798	-1.80647	1.30984	1.46292	1.14948	13	7	4	51	77	48	Bra039335	1	-	-	-	-	-	-
Bra001728	Bra001728.1	AT3G18950	-	transducin family protein / WD-40 repeat family protein	2.13881	1.5034	116.369	3.94515e-27	2.41898e-26	0.687478	-0.453457	-0.095582	1.85015	2.08683	2.16481	41	13	17	75	120	99	Bra001728	1	-	-	-	-	-	-
Bra007453	Bra007453.1	AT5G27060	AtRLP53	AtRLP53 (Receptor Like Protein 53);kinase/ protein binding	-2.95795	0.350595	115.969	4.82745e-27	2.95463e-26	1.34488	0.941074	1.16086	-1.271	-1.76611	-1.33326	66	37	43	7	6	7	Bra007453	1	-	-	-	-	-	-
Bra032265	Bra032265.1	AT1G48750	-	protease inhibitor/seed storage/lipid transfer protein (LTP) family protein	-2.36227	0.934727	115.786	5.29475e-27	3.2382e-26	1.89918	1.4917	1.57817	-0.976457	-0.424865	-0.327883	98	55	58	9	19	16	Bra032265	1	-	-	-	-	-	-
Bra006671	Bra006671.1	AT5G60250	-	zinc finger (C3HC4-type RING finger) family protein	2.40139	0.923491	115.325	6.67964e-27	4.07967e-26	-0.812762	-0.106919	-1.04129	1.55993	1.60129	1.55048	13	17	8	61	85	64	Bra006671	1	-	-	-	-	-	-
Bra010302	Bra010302.1	AT4G30180	-	transcription factor/ transcription regulator	2.23748	0.949299	114.883	8.34686e-27	5.09029e-26	-0.477883	-0.781944	-0.258608	1.46503	1.66579	1.67614	17	10	15	57	89	70	Bra010302	1	-	-	-	-	-	-
Bra017429	Bra017429.1	AT2G02010	GAD4	GAD4 (glutamate decarboxylase 4);calmodulin binding	2.31232	0.872306	114.096	1.24122e-26	7.53788e-26	-0.635628	-0.453457	-0.771293	1.51326	1.64993	1.43671	15	13	10	59	88	59	Bra017429	1	-	-	-	-	-	-
Bra019191	Bra019191.1	AT4G25090	-	respiratory burst oxidase,putative / NADPH oxidase,putative	-2.12796	0.951463	113.981	1.31558e-26	7.98231e-26	1.63127	1.68202	1.69417	-0.340468	-0.236224	-0.498479	81	63	63	15	22	14	Bra019191	1	-	-	-	-	-	-
Bra027351	Bra027351.1	AT3G14280	-	unknown protein	-2.83378	0.374649	113.785	1.45205e-26	8.80381e-26	1.3236	1.01371	1.16086	-1.44439	-1.46049	-1.18018	65	39	43	6	8	8	Bra027351	1	-	-	-	-	-	-
Bra023656	Bra023656.1	AT5G18030	-	auxin-responsive protein,putative	-2.15711	0.918916	113.755	1.47474e-26	8.93869e-26	1.71536	1.63674	1.52903	-0.340468	-0.493655	-0.327883	86	61	56	15	18	16	Bra023656	1	-	Auxin genes	-	-	-	-
Bra020545	Bra020545.1	-	-	-	6.00155	-0.388331	113.243	1.90868e-26	1.15414e-25	-3.54139	-2.88408	-3.54139	0.385128	0.52468	0.458637	0	1	0	26	39	29	Bra020545	1	-	-	-	-	-	-
Bra020563	Bra020563.1	AT5G26910	-	unknown protein	-2.31988	0.800841	112.973	2.18747e-26	1.32134e-25	1.52344	1.38622	1.67171	-0.731975	-0.236224	-1.18018	75	51	62	11	22	8	Bra020563	1	-	-	-	-	-	-
Bra030161	Bra030161.1	AT1G29720	-	protein kinase family protein	2.47134	0.723636	112.749	2.44945e-26	1.47784e-25	-0.635628	-1.20798	-0.899987	1.38952	1.55094	1.26065	15	7	9	54	82	52	Bra030161	1	-	-	-	-	-	-
Bra019696	Bra019696.1	AT1G13970	-	unknown protein	2.39219	0.785502	112.532	2.73178e-26	1.64598e-25	-0.5546	-0.781944	-1.04129	1.48935	1.38842	1.55048	16	10	8	58	73	64	Bra019696	1	-	-	-	-	-	-
Bra015549	Bra015549.1	AT1G07060	-	unknown protein	3.25319	0.314022	112.46	2.83369e-26	1.70663e-25	-1.3832	-1.81519	-2.42749	1.1664	1.22677	0.790481	8	4	2	46	65	37	Bra015549	1	-	-	-	-	-	-
Bra009223	Bra009223.1	AT5G06740	-	lectin protein kinase family protein	2.9609	0.638558	110.688	6.92568e-26	4.13195e-25	-1.87932	-1.38344	-0.543945	1.51326	1.13861	1.33875	5	6	12	59	61	55	Bra009223	1	-	-	-	-	-	-
Bra026245	Bra026245.1	AT4G17340	TIP2%3B2,DELTA-TIP2	TIP2%3B2 (TONOPLAST INTRINSIC PROTEIN 2%3B2);water channel	-3.93265	-0.125465	110.23	8.72403e-26	5.18662e-25	0.814924	0.559572	0.836652	-2.14135	-2.15438	-3.54139	45	28	34	3	4	0	Bra026245	1	-	-	-	-	-	-
Bra011561	Bra011561.1	AT4G34770	-	auxin-responsive family protein	2.74508	0.486569	109.422	1.31142e-25	7.76832e-25	-1.5304	-1.05157	-1.19796	1.13591	1.34967	1.09051	7	8	7	45	71	46	Bra011561	1	-	Auxin genes	-	-	-	-
Bra012605	Bra012605.1	AT4G18280	-	glycine-rich cell wall protein-related	-2.10344	1.18402	108.478	2.11134e-25	1.24686e-24	1.89918	1.72592	2.2588	0.220573	-0.424865	0.0269205	98	65	94	23	19	21	Bra012605	1	-	-	-	-	-	-
Bra007953	Bra007953.1	AT1G71000	-	heat shock protein binding	2.8231	0.630916	108.468	2.12287e-25	1.25348e-24	-1.3832	-0.453457	-1.80647	1.30984	1.26891	1.31318	8	13	4	51	67	54	Bra007953	1	-	-	-	-	-	-
Bra019466	Bra019466.1	AT3G44450	-	unknown protein	-2.25728	0.785905	108.383	2.21558e-25	1.30709e-24	1.36584	1.56604	1.64888	-0.623697	-0.99392	-0.175343	67	58	61	12	12	18	Bra019466	1	-	-	-	-	-	-
Bra003806	Bra003806.1	AT1G74370	-	zinc finger (C3HC4-type RING finger) family protein	-2.8674	0.27634	107.447	3.55291e-25	2.08939e-24	1.09157	1.08286	1.09485	-1.271	-1.46049	-1.69891	55	41	41	7	8	5	Bra003806	1	-	-	-	-	-	-
Bra001552	Bra001552.1	AT3G14440	NCED3,ATNCED3,STO1,SIS7	NCED3 (NINE-CIS-EPOXYCAROTENOID DIOXYGENASE 3);9-cis-epoxycarotenoid dioxygenase	-2.49264	0.844225	107.148	4.13136e-25	2.42571e-24	1.3236	1.74737	1.84234	-1.11622	-0.359205	-0.799434	65	66	70	8	20	11	Bra001552	1	-	-	-	-	-	-
Bra012409	Bra012409.1	AT1G27130	ATGSTU13,GST12	ATGSTU13 (ARABIDOPSIS THALIANA GLUTATHIONE S-TRANSFERASE TAU 13);glutathione transferase	-2.14639	1.08259	106.587	5.48186e-25	3.21262e-24	1.69893	1.8099	1.64888	0.332335	-0.807219	-0.249598	85	69	61	25	14	17	Bra012409	1	-	-	-	-	-	-
Bra025892	Bra025892.1	AT1G21320	-	nucleic acid binding / nucleotide binding	-2.01982	0.972443	106.49	5.75681e-25	3.37327e-24	1.68231	1.72592	1.57817	-0.623697	-0.122907	-0.104724	84	65	58	12	24	19	Bra025892	1	-	-	-	-	-	-
Bra002556	Bra002556.1	AT5G59590	UGT76E2	UGT76E2 (UDP-GLUCOSYL TRANSFERASE 76E2);UDP-glycosyltransferase/ quercetin 3-O-glucosyltransferase/ quercetin 7-O-glucosyltransferase	-2.23573	1.02853	105.997	7.38464e-25	4.31655e-24	1.82541	1.63674	1.52903	-0.623697	0.126658	-0.799434	93	61	56	12	29	11	Bra002556	1	-	-	-	-	-	-
Bra005911	Bra005911.1	AT5G06760	-	late embryogenesis abundant group 1 domain-containing protein / LEA group 1 domain-containing protein	-3.63055	-0.124662	105.468	9.64356e-25	5.62403e-24	0.874659	0.74167	0.571336	-2.91251	-2.15438	-1.92362	47	32	28	1	4	4	Bra005911	1	-	-	-	-	-	-
Bra035603	Bra035603.1	AT5G56100	-	glycine-rich protein / oleosin	-2.64258	0.391137	104.669	1.44336e-24	8.38627e-24	1.06617	1.33044	1.16086	-1.271	-0.99392	-1.50453	54	49	43	7	12	6	Bra035603	1	-	-	-	-	-	-
Bra036272	Bra036272.1	AT4G02380	SAG21,AtLEA5	SAG21 (SENESCENCE-ASSOCIATED GENE 21)	-3.73827	-0.180511	104.098	1.92536e-24	1.1155e-23	0.547674	0.903337	0.665301	-2.91251	-2.15438	-2.1899	37	36	30	1	4	3	Bra036272	1	-	-	-	-	-	-
Bra019369	Bra019369.1	AT4G22620	-	auxin-responsive family protein	4.86137	-0.220166	104.055	1.96768e-24	1.13953e-23	-3.54139	-2.43419	-2.8795	0.789365	0.299248	0.790481	0	2	1	35	33	37	Bra019369	1	-	Auxin genes	-	-	-	-
Bra007440	Bra007440.1	-	-	-	-3.88528	-0.225771	103.963	2.06126e-24	1.19304e-23	0.653777	0.559572	0.753519	-1.86989	-3.05201	-2.51671	40	28	32	4	1	2	Bra007440	1	-	-	-	-	-	-
Bra016180	Bra016180.1	AT1G70850	MLP34	MLP34 (MLP-LIKE PROTEIN 34)	-2.67651	0.745429	103.947	2.07833e-24	1.20275e-23	1.42698	1.68202	1.22398	-0.103822	-1.46049	-1.0418	70	63	45	18	8	9	Bra016180	1	-	-	-	-	-	-
Bra021444	Bra021444.1	AT2G47880	-	glutaredoxin family protein	3.45819	0.174338	103.674	2.38546e-24	1.37814e-23	-1.69433	-2.43419	-2.08382	1.07295	1.1157	0.592178	6	2	3	43	60	32	Bra021444	1	-	-	-	-	-	-
Bra033665	Bra033665.1	AT5G43160	-	unknown protein	-3.58246	0.114987	103.672	2.38704e-24	1.37886e-23	0.784102	0.941074	0.989795	-1.11622	-2.68725	-2.1899	44	37	38	8	2	3	Bra033665	1	-	-	-	-	-	-
Bra021164	Bra021164.1	AT3G16150	-	L-asparaginase,putative / L-asparagine amidohydrolase,putative	-2.01088	0.940449	103.322	2.84883e-24	1.64258e-23	1.7316	1.59	1.52903	-0.178473	-0.296404	-0.327883	87	59	56	17	21	16	Bra021164	1	-	-	-	-	-	-
Bra037901	Bra037901.1	AT4G10040	CYTC-2	CYTC-2 (cytochrome c-2);electron carrier/ heme binding / iron ion binding	-3.23473	0.0154789	102.905	3.51673e-24	2.02252e-23	0.903624	0.824767	0.836652	-1.44439	-2.15438	-2.1899	48	34	34	6	4	3	Bra037901	1	-	-	-	-	-	-
Bra021039	Bra021039.1	AT4G17660	-	protein kinase,putative	2.5723	0.516105	102.451	4.42277e-24	2.53714e-23	-1.5304	-0.781944	-1.04129	1.10477	1.28953	1.23365	7	10	8	44	68	51	Bra021039	1	-	-	-	-	-	-
Bra025061	Bra025061.1	AT5G45720	-	ATP binding / DNA binding / DNA-directed DNA polymerase/ nucleoside-triphosphatase/ nucleotide binding	-2.15563	1.14205	101.898	5.84642e-24	3.34674e-23	2.00988	1.86983	1.52903	-0.178473	-0.641935	0.258868	106	72	56	17	16	25	Bra025061	1	-	-	-	-	-	-
Bra030670	Bra030670.1	AT1G07080	-	gamma interferon responsive lysosomal thiol reductase family protein / GILT family protein	2.23402	0.773406	100.932	9.52153e-24	5.42459e-23	-0.40504	-0.910466	-0.771293	1.38952	1.36918	1.55048	18	9	10	54	72	64	Bra030670	1	-	-	-	-	-	-
Bra030725	Bra030725.1	AT1G08430	ALMT1,ATALMT1	ALMT1 (ALUMINUM-ACTIVATED MALATE TRANSPORTER 1);malate transmembrane transporter	-2.10602	0.793613	100.031	1.50005e-23	8.49848e-23	1.44679	1.68202	1.37067	-0.849043	-0.359205	-0.327883	71	63	50	10	20	16	Bra030725	1	-	-	-	-	-	-
Bra007592	Bra007592.1	AT3G61280	-	FUNCTIONS IN: molecular_function unknown;INVOLVED IN: biological_process unknown;LOCATED IN: cellular_component unknown;CONTAINS InterPro DOMAIN/s: Lipopolysaccharide-modifying protein (InterPro:IPR006598),Protein of unknown function DUF821,CAP10-like (InterPro:IPR008539);BEST Arabidopsis thaliana protein match is: unknown protein (TAIR:AT3G61290.1);Has 467 Blast hits to 463 proteins in 98 specie…	2.6628	0.418497	99.7161	1.75884e-23	9.95216e-23	-1.01473	-1.20798	-1.80647	1.19625	1.248	0.897573	11	7	4	47	66	40	Bra007592	1	-	-	-	-	-	-
Bra026485	Bra026485.1	AT5G23730	-	nucleotide binding	-2.84234	0.380392	99.226	2.25266e-23	1.27163e-22	1.46634	0.977849	1.02567	-1.271	-1.20842	-1.69891	72	38	39	7	10	5	Bra026485	1	-	-	-	-	-	-
Bra001068	Bra001068.1	AT3G02850	SKOR	SKOR;cyclic nucleotide binding / inward rectifier potassium channel/ outward rectifier potassium channel	-2.50554	0.622749	99.0851	2.41878e-23	1.3637e-22	1.23521	1.3586	1.75954	-0.623697	-1.20842	-0.799434	61	50	66	12	10	11	Bra001068	1	-	-	-	-	-	-
Bra016712	Bra016712.1	AT1G14080	FUT6,ATFUT6	FUT6 (FUCOSYLTRANSFERASE 6);fucosyltransferase/ transferase,transferring glycosyl groups	2.19591	0.77987	98.7944	2.80128e-23	1.57652e-22	-0.721478	-0.66394	-0.442432	1.58271	1.3299	1.41283	14	11	13	62	70	58	Bra016712	1	-	-	-	-	-	-
Bra038768	Bra038768.1	AT4G21630	-	subtilase family protein	2.15259	0.815362	98.3676	3.47506e-23	1.95247e-22	-0.5546	-0.269808	-0.899987	1.58271	1.38842	1.43671	16	15	9	62	73	59	Bra038768	1	-	-	-	-	-	-
Bra019862	Bra019862.1	AT1G11350	CBRLK1,SD1-13,RKS2	SD1-13 (S-DOMAIN-1 13);kinase/ protein kinase/ protein serine/threonine kinase	2.04603	0.922839	98.317	3.56489e-23	2.00239e-22	-0.269539	-0.453457	-0.442432	1.58271	1.40741	1.69605	20	13	13	62	74	71	Bra019862	1	-	-	-	-	-	-
Bra027149	Bra027149.1	AT2G42470	-	meprin and TRAF homology domain-containing protein / MATH domain-containing protein	2.01264	0.955169	98.0808	4.01649e-23	2.25264e-22	-0.721478	-0.186066	-0.0204941	1.62722	1.56792	1.55048	14	16	18	64	83	64	Bra027149	1	-	-	-	-	-	-
Bra027830	Bra027830.1	AT1G61580	RPL3B,ARP2	RPL3B (R-PROTEIN L3 B);structural constituent of ribosome	4.11188	-0.258035	97.8674	4.47352e-23	2.50516e-22	-2.64153	-2.88408	-2.42749	0.666788	0.453379	0.549024	2	1	2	32	37	31	Bra027830	1	-	-	-	-	-	-
Bra028859	Bra028859.1	AT5G02890	-	transferase family protein	3.43483	0.0308221	97.4522	5.51731e-23	3.08204e-22	-1.87932	-2.09175	-2.42749	0.48525	0.836302	1.02902	5	3	2	28	49	44	Bra028859	1	-	-	-	-	-	-
Bra029117	Bra029117.1	AT5G52400	CYP715A1	CYP715A1;electron carrier/ heme binding / iron ion binding / monooxygenase/ oxygen binding	-5.11309	-0.631822	95.4947	1.48288e-22	8.20694e-22	0.392853	0.107389	0.305558	-2.91251	-3.05201	-3.54139	33	20	23	1	1	0	Bra029117	1	-	-	-	-	-	-
Bra030601	Bra030601.1	AT5G40170	AtRLP54	AtRLP54 (Receptor Like Protein 54);kinase/ protein binding	2.38268	0.607846	94.7682	2.1404e-22	1.17899e-21	-1.12741	-0.453457	-1.19796	1.48935	1.1157	1.28716	10	13	7	58	60	53	Bra030601	1	-	-	-	-	-	-
Bra027841	Bra027841.1	AT3G43850	-	unknown protein	3.45761	-0.083831	94.4033	2.5736e-22	1.41435e-21	-2.09155	-1.81519	-2.8795	0.749652	0.592622	0.752942	4	4	1	34	41	36	Bra027841	1	-	-	-	-	-	-
Bra004016	Bra004016.1	AT1G68750	ATPPC4	ATPPC4;phosphoenolpyruvate carboxylase	3.34951	-0.040158	94.2038	2.84658e-22	1.5631e-21	-2.34049	-1.58322	-2.42749	0.749652	0.559051	0.897573	3	5	2	34	40	40	Bra004016	1	-	-	-	-	-	-
Bra008345	Bra008345.1	AT1G78100	-	F-box family protein	2.64255	0.727584	94.0892	3.01622e-22	1.65514e-21	-0.206279	-1.58322	-1.37374	1.28227	1.40741	1.23365	21	5	6	50	74	51	Bra008345	1	-	-	-	-	-	-
Bra002653	Bra002653.1	AT4G13235	EDA21	EDA21 (embryo sac development arrest 21)	-2.21729	0.837511	93.7297	3.61691e-22	1.98049e-21	1.34488	1.56604	1.57817	0.220573	-0.897551	-0.691987	66	58	58	23	13	12	Bra002653	1	-	-	-	-	-	-
Bra010639	Bra010639.1	-	-	-	-2.47401	0.851731	93.2713	4.55963e-22	2.49133e-21	1.69893	2.05331	1.22398	-0.340468	-0.641935	-0.915531	85	82	45	15	16	10	Bra010639	1	-	-	-	-	-	-
Bra000045	Bra000045.1	AT2G38240	-	oxidoreductase,2OG-Fe(II) oxygenase family protein	3.06967	0.158393	92.8553	5.62597e-22	3.06573e-21	-2.09155	-1.81519	-1.37374	0.97302	0.657508	1.12029	4	4	6	40	43	47	Bra000045	1	-	-	-	-	-	-
Bra006862	Bra006862.1	AT5G01560	LECRKA4.3	LECRKA4.3 (LECTIN RECEPTOR KINASE A4.3);kinase	-2.44457	0.457094	92.8129	5.74807e-22	3.13185e-21	1.30201	1.0487	1.16086	-0.976457	-0.722211	-1.92362	64	40	43	9	15	4	Bra006862	1	-	-	-	-	-	-
Bra033670	Bra033670.1	AT1G56140	-	leucine-rich repeat family protein / protein kinase family protein	2.21677	0.778592	92.5901	6.43298e-22	3.50127e-21	-0.477883	-0.910466	-0.543945	1.73284	1.36918	1.28716	17	9	12	69	72	53	Bra033670	1	-	-	-	-	-	-
Bra007843	Bra007843.1	AT2G24540	AFR	AFR (ATTENUATED FAR-RED RESPONSE)	-2.05169	0.849154	92.1957	7.8514e-22	4.26187e-21	1.48562	1.59	1.45202	-1.271	-0.296404	-0.175343	73	59	53	7	21	18	Bra007843	1	-	-	-	-	-	-
Bra038289	Bra038289.1	AT3G45330	-	lectin protein kinase family protein	2.61822	0.376178	91.6942	1.01162e-21	5.47663e-21	-0.812762	-1.81519	-1.57394	1.13591	1.09242	0.964792	13	4	5	45	59	42	Bra038289	1	-	-	-	-	-	-
Bra039697	Bra039697.1	AT1G53890	-	unknown protein	-2.72421	0.16147	91.0179	1.42381e-21	7.68564e-21	0.845101	1.18075	0.836652	-0.976457	-1.46049	-2.1899	46	44	34	9	8	3	Bra039697	1	-	-	-	-	-	-
Bra025261	Bra025261.1	AT3G27250	-	unknown protein	-2.19786	0.568884	90.7974	1.59165e-21	8.57458e-21	1.1889	1.21195	1.47815	-0.623697	-0.99392	-0.591991	59	45	54	12	12	13	Bra025261	1	-	-	-	-	-	-
Bra013137	Bra013137.1	AT2G13810	ALD1	ALD1 (AGD2-LIKE DEFENSE RESPONSE PROTEIN1);catalytic/ pyridoxal phosphate binding / transaminase/ transferase,transferring nitrogenous groups	3.66871	-0.221659	90.4758	1.87249e-21	1.00689e-20	-2.09155	-2.43419	-2.8795	0.578873	0.453379	0.674798	4	2	1	30	37	34	Bra013137	1	-	-	-	-	-	-
Bra035210	Bra035210.1	AT1G74450	-	unknown protein	-2.84577	0.14326	90.2806	2.06665e-21	1.10982e-20	1.014	1.11623	0.619083	-2.47601	-1.32896	-1.33326	52	42	29	2	9	7	Bra035210	1	-	-	-	-	-	-
Bra037977	Bra037977.1	AT3G13920	EIF4A1,RH4,TIF4A1	EIF4A1 (EUKARYOTIC TRANSLATION INITIATION FACTOR 4A1);ATP-dependent helicase/ translation initiation factor	4.99264	-0.559644	89.9589	2.43158e-21	1.30322e-20	-2.64153	-3.54139	-3.54139	0.385128	0.215532	0.204282	2	0	0	26	31	24	Bra037977	1	-	-	-	-	-	-
Bra020315	Bra020315.1	AT5G59490	-	haloacid dehalogenase-like hydrolase family protein	-4.1332	-0.42264	89.9097	2.49288e-21	1.33572e-20	0.472339	0.74167	0.118886	-2.47601	-3.05201	-2.51671	35	32	20	2	1	2	Bra020315	1	-	-	-	-	-	-
Bra019719	Bra019719.1	AT1G13530	-	unknown protein	-2.50837	0.284296	89.8768	2.53467e-21	1.35757e-20	1.09157	0.864587	1.16086	-1.44439	-0.99392	-1.33326	55	35	43	6	12	7	Bra019719	1	-	-	-	-	-	-
Bra019711	Bra019711.1	AT1G66700	PXMT1	PXMT1;S-adenosylmethionine-dependent methyltransferase	-2.89085	0.123273	89.6888	2.78727e-21	1.49149e-20	1.06617	0.977849	0.619083	-1.271	-2.39635	-1.33326	54	38	29	7	3	7	Bra019711	1	-	-	-	-	-	-
Bra034138	Bra034138.1	-	-	-	-2.20938	0.540624	89.6746	2.8074e-21	1.50207e-20	1.16518	1.38622	1.25454	-0.849043	-0.897551	-0.591991	58	51	46	10	13	13	Bra034138	1	-	-	-	-	-	-
Bra018861	Bra018861.1	AT1G50630	-	unknown protein	-2.07964	0.681686	89.3374	3.32901e-21	1.77741e-20	1.52344	1.41332	1.12823	-0.522982	-0.565891	-0.591991	75	52	42	13	17	13	Bra018861	1	-	-	-	-	-	-
Bra015887	Bra015887.1	AT1G74870	-	protein binding / zinc ion binding	3.51305	-0.186232	88.911	4.12971e-21	2.19956e-20	-3.02241	-1.81519	-2.08382	0.6235	0.657508	0.458637	1	4	3	31	43	29	Bra015887	1	-	-	-	-	-	-
Bra023643	Bra023643.1	AT5G17860	CAX7	CAX7 (calcium exchanger 7);calcium:sodium antiporter/ cation:cation antiporter	4.99214	-0.560834	88.9055	4.14133e-21	2.20533e-20	-3.02241	-2.88408	-3.54139	0.332335	0.416362	-0.0374006	1	1	0	25	36	20	Bra023643	1	-	-	-	-	-	-
Bra031655	Bra031655.1	AT1G09050	-	unknown protein	-2.44108	0.512112	88.5366	4.9902e-21	2.6494e-20	1.014	1.51691	1.31377	-1.64151	-0.641935	-0.915531	52	56	48	5	16	10	Bra031655	1	-	-	-	-	-	-
Bra032375	Bra032375.1	AT1G30280	-	heat shock protein binding	2.20875	0.787769	88.3865	5.38376e-21	2.85499e-20	-0.477883	-0.453457	-0.899987	1.8121	1.3299	1.38856	17	13	9	73	70	57	Bra032375	1	-	-	-	-	-	-
Bra037835	Bra037835.1	AT5G67620	-	unknown protein	2.34783	0.4873	88.1615	6.03219e-21	3.19511e-20	-1.5304	-0.554863	-0.899987	1.10477	1.18337	1.17809	7	12	9	44	63	49	Bra037835	1	-	-	-	-	-	-
Bra012898	Bra012898.1	AT3G50470	HR3,MLA10	HR3 (HOMOLOG OF RPW8 3)	2.43201	0.893417	87.8757	6.96992e-21	3.68221e-20	-0.40504	-0.781944	-0.771293	2.10744	1.34967	1.67614	18	10	10	90	71	70	Bra012898	1	-	-	-	-	-	-
Bra003118	Bra003118.1	AT4G25740	-	40S ribosomal protein S10 (RPS10A)	-3.49042	-0.26044	87.618	7.93974e-21	4.18913e-20	0.472339	0.698255	0.571336	-1.64151	-3.05201	-2.1899	35	31	28	5	1	3	Bra003118	1	-	-	-	-	-	-
Bra008715	Bra008715.1	AT5G15180	-	peroxidase,putative	-5.93894	-0.662318	86.676	1.27838e-20	6.71532e-20	-0.0316155	0.824767	0.245978	-3.54139	-3.54139	-2.93993	24	34	22	0	0	1	Bra008715	1	-	-	-	-	-	-
Bra018711	Bra018711.1	AT1G45063	-	copper ion binding / electron carrier	2.05271	0.736475	86.395	1.4736e-20	7.72287e-20	-0.5546	-0.269808	-0.899987	1.13591	1.44465	1.46019	16	15	9	45	76	60	Bra018711	1	-	-	-	-	-	-
Bra002907	Bra002907.1	AT5G55450	-	protease inhibitor/seed storage/lipid transfer protein (LTP) family protein	2.29409	0.536872	85.3721	2.4718e-20	1.28681e-19	-0.635628	-0.910466	-1.37374	0.97302	1.36918	1.17809	15	9	6	40	72	49	Bra002907	1	-	-	-	-	-	-
Bra003566	Bra003566.1	AT1G80450	-	VQ motif-containing protein	-2.67358	0.243149	84.2452	4.37072e-20	2.26034e-19	0.720411	1.11623	1.28446	-1.11622	-1.60522	-1.33326	42	42	47	8	7	7	Bra003566	1	-	-	-	-	-	-
Bra000927	Bra000927.1	AT4G01410	-	harpin-induced family protein / HIN1 family protein / harpin-responsive family protein	2.60241	0.307913	84.1905	4.49333e-20	2.32287e-19	-1.87932	-1.05157	-1.04129	1.25416	0.807999	0.997262	5	8	8	49	48	43	Bra000927	1	-	-	-	-	-	-
Bra011129	Bra011129.1	AT4G29690	-	type I phosphodiesterase/nucleotide pyrophosphatase family protein	-2.35804	0.3191	84.1194	4.65768e-20	2.40569e-19	0.874659	1.18075	1.16086	-1.11622	-1.46049	-0.691987	47	44	43	8	8	12	Bra011129	1	-	-	-	-	-	-
Bra023175	Bra023175.1	AT1G31310	-	hydroxyproline-rich glycoprotein family protein	-2.30215	0.367065	84.107	4.68712e-20	2.42059e-19	1.014	1.33044	0.953006	-1.11622	-0.807219	-1.18018	52	49	37	8	14	8	Bra023175	1	-	-	-	-	-	-
Bra012717	Bra012717.1	AT4G16447	-	unknown protein	2.67924	0.165958	83.7091	5.73211e-20	2.95164e-19	-1.12741	-1.81519	-1.80647	0.902338	0.918022	0.790481	10	4	4	38	52	37	Bra012717	1	-	-	-	-	-	-
Bra029434	Bra029434.1	AT4G12030	-	bile acid:sodium symporter family protein	2.5039	0.290014	83.6074	6.03469e-20	3.10431e-19	-1.5304	-0.910466	-1.37374	1.07295	1.02025	0.827069	7	9	6	43	56	38	Bra029434	1	-	-	Glucosinolate genes	-	-	-
Bra036306	Bra036306.1	AT4G01220	-	FUNCTIONS IN: molecular_function unknown;INVOLVED IN: biological_process unknown;LOCATED IN: endoplasmic reticulum;EXPRESSED IN: 22 plant structures;EXPRESSED DURING: 13 growth stages;CONTAINS InterPro DOMAIN/s: Reticulon (InterPro:IPR003388);BEST Arabidopsis thaliana protein match is: RGXT1 (rhamnogalacturonan xylosyltransferase 1);UDP-xylosyltransferase (TAIR:AT4G01770.1);Has 188 Blast hits to …	2.79708	0.18598	83.5541	6.19953e-20	3.18709e-19	-1.69433	-1.38344	-1.57394	1.1664	0.657508	0.931574	6	6	5	46	43	41	Bra036306	1	-	-	-	-	-	-
Bra017680	Bra017680.1	AT4G34800	-	auxin-responsive family protein	2.22417	0.751198	83.2112	7.37401e-20	3.78132e-19	-0.721478	-0.554863	-0.653145	1.48935	1.1157	1.65594	14	12	11	58	60	69	Bra017680	1	-	Auxin genes	-	-	-	-
Bra015075	Bra015075.1	AT3G24750	-	unknown protein	-7.44674	-0.898102	82.976	8.30569e-20	4.25318e-19	0.392853	-0.106919	-0.442432	-3.54139	-3.54139	-3.54139	33	17	13	0	0	0	Bra015075	1	-	-	-	-	-	-
Bra026317	Bra026317.1	AT4G27670	HSP21	HSP21 (HEAT SHOCK PROTEIN 21)	-2.16347	0.467342	82.2809	1.18059e-19	6.02281e-19	1.25782	1.11623	1.12823	-0.623697	-1.09719	-0.691987	62	42	42	12	11	12	Bra026317	1	-	-	-	-	-	-
Bra026684	Bra026684.1	AT1G17180	ATGSTU25	ATGSTU25 (GLUTATHIONE S-TRANSFERASE TAU 25);glutathione transferase	2.18491	0.537716	82.2488	1.19992e-19	6.11989e-19	-0.721478	-0.554863	-1.37374	1.2255	1.18337	1.14948	14	12	6	48	63	48	Bra026684	1	-	-	-	-	-	-
Bra032252	Bra032252.1	AT1G48330	-	unknown protein	2.4408	0.298479	81.1608	2.08081e-19	1.05479e-18	-1.01473	-1.58322	-1.19796	0.902338	0.891293	1.14948	11	5	7	38	51	48	Bra032252	1	-	-	-	-	-	-
Bra012733	Bra012733.1	AT4G16190	-	cysteine proteinase,putative	7.32214	-0.918883	80.6431	2.70394e-19	1.36726e-18	-3.54139	-3.54139	-3.54139	0.0994213	-0.296404	-0.0374006	0	0	0	21	21	20	Bra012733	1	-	-	-	-	-	-
Bra007718	Bra007718.1	AT3G62960	-	glutaredoxin family protein	4.41023	-0.605957	79.4657	4.90661e-19	2.46268e-18	-3.02241	-2.88408	-2.8795	0.277536	0.215532	0.0884959	1	1	1	24	31	22	Bra007718	1	-	-	-	-	-	-
Bra026103	Bra026103.1	AT1G15790	-	unknown protein	3.87887	-0.455604	79.0994	5.90626e-19	2.95858e-18	-2.64153	-2.43419	-2.8795	0.578873	0.171779	0.258868	2	2	1	30	30	25	Bra026103	1	-	-	-	-	-	-
Bra023009	Bra023009.1	AT2G43590	-	chitinase,putative	2.10742	0.559453	79.0634	6.01488e-19	3.01188e-18	-0.812762	-0.66394	-0.771293	1.1664	1.04471	1.38856	13	11	10	46	57	57	Bra023009	1	-	-	-	-	-	-
Bra037084	Bra037084.1	AT4G15160	-	lipid binding / structural constituent of cell wall	-2.43032	0.170067	78.8351	6.75168e-19	3.37584e-18	0.874659	0.941074	0.953006	-1.11622	-1.09719	-1.69891	47	37	37	8	11	5	Bra037084	1	-	-	-	-	-	-
Bra014774	Bra014774.1	AT3G55130	ATWBC19	ATWBC19 (White-Brown Complex homolog 19);ATPase,coupled to transmembrane movement of substances	4.36502	-0.454863	78.7565	7.02569e-19	3.50896e-18	-3.54139	-2.09175	-2.8795	0.277536	0.453379	0.0884959	0	3	1	24	37	22	Bra014774	1	-	-	-	-	-	-
Bra020861	Bra020861.1	AT5G11250	-	disease resistance protein (TIR-NBS-LRR class),putative	2.62148	0.120174	78.5211	7.91478e-19	3.94914e-18	-1.5304	-1.81519	-1.19796	0.938112	0.749673	0.790481	7	4	7	39	46	37	Bra020861	1	-	-	-	-	-	Resistence gene
Bra006047	Bra006047.1	AT5G10100	-	trehalose-6-phosphate phosphatase,putative	-3.31657	-0.382399	78.4126	8.36164e-19	4.17006e-18	0.392853	0.559572	0.417809	-2.91251	-1.76611	-2.51671	33	28	25	1	6	2	Bra006047	1	-	-	-	-	-	-
Bra011594	Bra011594.1	-	-	-	4.21695	-0.440423	78.303	8.83882e-19	4.40695e-18	-3.02241	-2.88408	-2.42749	0.666788	0.0319469	0.411228	1	1	2	32	27	28	Bra011594	1	-	-	-	-	-	-
Bra028281	Bra028281.1	AT5G51850	-	unknown protein	-2.96269	-0.204336	78.1963	9.32933e-19	4.64867e-18	0.433144	0.74167	0.665301	-2.14135	-1.76611	-1.92362	34	32	30	3	6	4	Bra028281	1	-	-	-	-	-	-
Bra027991	Bra027991.1	AT4G10270	-	wound-responsive family protein	2.09314	0.657163	77.7995	1.1405e-18	5.67114e-18	-1.12741	-0.186066	-0.653145	1.2255	1.13861	1.4833	10	16	11	48	61	61	Bra027991	1	-	-	-	-	-	-
Bra021572	Bra021572.1	AT3G14690	CYP72A15	CYP72A15;electron carrier/ heme binding / iron ion binding / monooxygenase/ oxygen binding	2.89488	0.102354	77.7961	1.14246e-18	5.68021e-18	-2.34049	-1.58322	-1.19796	1.0404	0.52468	0.964792	3	5	7	42	39	42	Bra021572	1	-	-	-	-	-	-
Bra025877	Bra025877.1	AT1G66235	-	unknown protein	-3.20356	-0.34208	77.6035	1.25945e-18	6.25778e-18	0.510498	0.559572	0.362775	-2.14135	-2.68725	-1.69891	36	28	24	3	2	5	Bra025877	1	-	-	-	-	-	-
Bra016829	Bra016829.1	AT5G28237	-	tryptophan synthase,beta subunit,putative	3.83752	-0.260766	77.5052	1.32372e-18	6.57015e-18	-2.64153	-2.88408	-2.08382	0.161269	0.836302	0.411228	2	1	3	22	49	28	Bra016829	1	-	-	-	-	-	-
Bra011563	Bra011563.1	AT4G34800	-	auxin-responsive family protein	4.45109	-0.573674	77.1301	1.60063e-18	7.92524e-18	-2.64153	-2.88408	-3.54139	0.161269	-0.0178469	0.549024	2	1	0	22	26	31	Bra011563	1	-	Auxin genes	-	-	-	-
Bra009057	Bra009057.1	AT5G10100	-	trehalose-6-phosphate phosphatase,putative	2.02218	0.606778	76.8157	1.87682e-18	9.27022e-18	-0.40504	-0.910466	-0.771293	1.19625	1.30986	1.14948	18	9	10	47	69	48	Bra009057	1	-	-	-	-	-	-
Bra020713	Bra020713.1	AT5G48180	NSP5	NSP5 (NITRILE SPECIFIER PROTEIN 5)	2.89148	-0.0846339	76.6586	2.03221e-18	1.0028e-17	-1.69433	-2.43419	-1.57394	0.666788	0.7196	0.504538	6	2	5	32	45	30	Bra020713	1	-	-	-	-	-	-
Bra016091	Bra016091.1	AT1G22650	-	beta-fructofuranosidase,putative / invertase,putative / saccharase,putative / beta-fructosidase,putative	2.41815	0.280625	76.5854	2.10897e-18	1.04017e-17	-1.24964	-1.05157	-1.37374	0.865655	1.16116	0.752942	9	8	6	37	62	36	Bra016091	1	-	-	-	-	-	-
Bra035195	Bra035195.1	AT1G80120	-	unknown protein	-2.00521	0.783982	76.3517	2.3739e-18	1.16999e-17	1.36584	1.88926	1.3983	-0.257198	-0.178453	-0.799434	67	73	51	16	23	11	Bra035195	1	-	-	-	-	-	-
Bra023576	Bra023576.1	AT5G16600	MYB43,AtMYB43	MYB43 (myb domain protein 43);DNA binding / transcription factor	-2.01062	0.739507	76.0298	2.79422e-18	1.37332e-17	1.56028	0.977849	1.6257	-0.623697	-0.296404	-0.410661	77	38	60	12	21	15	Bra023576	1	-	-	-	-	-	-
Bra027760	Bra027760.1	AT1G64065	-	FUNCTIONS IN: molecular_function unknown;INVOLVED IN: biological_process unknown;LOCATED IN: membrane;CONTAINS InterPro DOMAIN/s: Harpin-induced 1 (InterPro:IPR010847);BEST Arabidopsis thaliana protein match is: unknown protein (TAIR:AT2G44000.1);Has 69 Blast hits to 69 proteins in 10 species: Archae - 0;Bacteria - 0;Metazoa - 0;Fungi - 0;Plants - 68;Viruses - 0;Other Eukaryotes - 1 (source: NCBI…	-5.57654	-0.73202	75.8553	3.05232e-18	1.498e-17	0.0740859	0.107389	0.0508783	-2.47601	-3.54139	-3.54139	26	20	19	2	0	0	Bra027760	1	-	-	-	-	-	-
Bra017254	Bra017254.1	AT2G36210	-	auxin-responsive family protein	3.13198	-0.222457	75.8167	3.11253e-18	1.52682e-17	-2.09155	-2.43419	-1.80647	0.220573	0.592622	0.674798	4	2	4	23	41	34	Bra017254	1	-	Auxin genes	-	-	-	-
Bra037436	Bra037436.1	AT5G49120	-	senescence-associated protein-related	-2.74397	-0.113654	75.7598	3.2036e-18	1.57111e-17	0.752608	0.607297	0.619083	-1.86989	-1.46049	-1.92362	43	29	29	4	8	4	Bra037436	1	-	-	-	-	-	-
Bra010190	Bra010190.1	AT5G49690	-	UDP-glucoronosyl/UDP-glucosyl transferase family protein	7.38467	-0.864563	75.5339	3.59185e-18	1.75833e-17	-3.54139	-3.54139	-3.54139	-0.428841	0.0800794	0.14755	0	0	0	14	28	23	Bra010190	1	-	-	-	-	-	-
Bra016635	Bra016635.1	AT1G79000	HAC1,PCAT2,ATHPCAT2	HAC1 (HISTONE ACETYLTRANSFERASE OF THE CBP FAMILY 1);H3/H4 histone acetyltransferase/ histone acetyltransferase/ transcription cofactor	3.25939	0.00533724	74.7036	5.46971e-18	2.66543e-17	-1.69433	-1.81519	-3.54139	0.749652	0.416362	1.02902	6	4	0	34	36	44	Bra016635	1	-	-	-	-	-	-
Bra027440	Bra027440.1	AT4G19390	-	FUNCTIONS IN: molecular_function unknown;INVOLVED IN: biological_process unknown;LOCATED IN: chloroplast;EXPRESSED IN: 23 plant structures;EXPRESSED DURING: 13 growth stages;CONTAINS InterPro DOMAIN/s: Uncharacterised conserved protein UCP022348 (InterPro:IPR016804),Uncharacterised protein family UPF0114 (InterPro:IPR005134);BEST Arabidopsis thaliana protein match is: unknown protein (TAIR:AT5G13…	3.4543	-0.401663	74.1818	7.12425e-18	3.45844e-17	-2.34049	-2.88408	-2.08382	0.161269	0.416362	0.458637	3	1	3	22	36	29	Bra027440	1	-	-	-	-	-	-
Bra036810	Bra036810.1	AT3G51400	-	unknown protein	3.61929	-0.0628456	73.6991	9.09804e-18	4.39982e-17	-2.34049	-3.54139	-1.19796	0.666788	0.339352	0.827069	3	0	7	32	34	38	Bra036810	1	-	-	-	-	-	-
Bra021223	Bra021223.1	AT4G30210	ATR2,AR2	ATR2 (ARABIDOPSIS P450 REDUCTASE 2);NADPH-hemoprotein reductase	-2.67337	0.0391437	73.2812	1.12436e-17	5.41617e-17	0.959866	1.01371	0.362775	-1.271	-1.60522	-1.69891	50	39	24	7	7	5	Bra021223	1	-	-	-	-	-	-
Bra036879	Bra036879.1	AT4G14650	-	unknown protein	-3.05459	-0.342343	73.2066	1.16766e-17	5.62141e-17	0.433144	0.559572	0.417809	-2.14135	-1.94722	-2.1899	34	28	25	3	5	3	Bra036879	1	-	-	-	-	-	-
Bra013226	Bra013226.1	AT3G25190	-	nodulin,putative	-2.14112	0.657707	73.0596	1.25796e-17	6.05042e-17	1.014	1.65956	1.47815	-0.522982	-0.424865	-0.915531	52	62	54	13	19	10	Bra013226	1	-	-	-	-	-	-
Bra002594	Bra002594.1	AT5G59220	-	protein phosphatase 2C,putative / PP2C,putative	-2.02549	0.765035	71.7147	2.48669e-17	1.18649e-16	1.38651	1.68202	1.16086	0.0348034	-0.99392	-0.410661	68	63	43	20	12	15	Bra002594	1	-	-	-	-	-	-
Bra012887	Bra012887.1	AT3G50800	-	unknown protein	-2.17692	0.564121	71.6135	2.61765e-17	1.24824e-16	1.25782	1.63674	0.989795	-1.271	-0.359205	-0.799434	62	61	38	7	20	11	Bra012887	1	-	-	-	-	-	-
Bra017455	Bra017455.1	AT2G01340	-	unknown protein	3.75503	-0.558752	71.517	2.7488e-17	1.31017e-16	-2.34049	-2.88408	-2.8795	0.385128	0.0800794	0.204282	3	1	1	26	28	24	Bra017455	1	-	-	-	-	-	-
Bra013399	Bra013399.1	AT4G19460	-	glycosyl transferase family 1 protein	2.93395	-0.152023	71.4451	2.85084e-17	1.35801e-16	-1.87932	-2.43419	-1.57394	0.220573	0.657508	0.752942	5	2	5	23	43	36	Bra013399	1	-	-	-	-	-	-
Bra020438	Bra020438.1	AT5G57510	-	unknown protein	-2.51775	0.182431	71.2066	3.21708e-17	1.52961e-16	0.845101	0.824767	1.45202	-1.64151	-1.20842	-1.0418	46	34	53	5	10	9	Bra020438	1	-	-	-	-	-	-
Bra019570	Bra019570.1	AT3G48850	-	mitochondrial phosphate transporter,putative	2.04321	0.565064	70.7447	4.06576e-17	1.92772e-16	-0.910214	-1.05157	-0.174794	1.10477	1.09242	1.28716	12	8	16	44	59	53	Bra019570	1	-	-	-	-	-	-
Bra000566	Bra000566.1	AT2G24450	FLA3	FLA3 (FASCICLIN-LIKE ARABINOGALACTAN PROTEIN 3 PRECURSOR)	-2.18484	0.23259	70.2807	5.14382e-17	2.43178e-16	1.014	0.783817	0.989795	-1.271	-1.20842	-0.691987	52	33	38	7	10	12	Bra000566	1	-	-	-	-	-	-
Bra032068	Bra032068.1	AT1G64840	-	F-box family protein	5.35723	-0.940188	69.68	6.97512e-17	3.28685e-16	-3.54139	-3.54139	-2.8795	-0.257198	-0.122907	-0.0374006	0	0	1	16	24	20	Bra032068	1	-	-	-	-	-	-
Bra019024	Bra019024.1	AT4G27840	-	FUNCTIONS IN: molecular_function unknown;INVOLVED IN: transport;LOCATED IN: endomembrane system;EXPRESSED IN: 24 plant structures;EXPRESSED DURING: 15 growth stages;CONTAINS InterPro DOMAIN/s: Longin-like (InterPro:IPR011012);BEST Arabidopsis thaliana protein match is: vesicle-associated membrane protein-related (TAIR:AT5G52990.1);Has 165 Blast hits to 165 proteins in 10 species: Archae - 0;Bacte…	2.20743	0.465766	69.6283	7.16011e-17	3.37012e-16	-1.01473	-0.910466	-0.771293	1.13591	0.836302	1.38856	11	9	10	45	49	57	Bra019024	1	-	-	-	-	-	-
Bra022131	Bra022131.1	AT5G47450	ATTIP2%3B3,TIP2%3B3,DELTA-TIP3	AtTIP2%3B3;ammonia transporter/ methylammonium transmembrane transporter/ water channel	-3.08471	-0.436169	68.7121	1.13939e-16	5.33448e-16	0.172569	0.510216	0.470821	-2.14135	-1.94722	-2.51671	28	27	26	3	5	2	Bra022131	1	-	-	-	-	-	-
Bra021404	Bra021404.1	AT3G62690	ATL5	ATL5 (ATL5);protein binding / zinc ion binding	2.93931	-0.258783	68.607	1.20176e-16	5.62201e-16	-1.5304	-2.09175	-2.8795	0.532821	0.453379	0.411228	7	3	1	29	37	28	Bra021404	1	-	-	-	-	-	-
Bra010945	Bra010945.1	AT1G23560	-	unknown protein	2.27181	0.32391	68.5218	1.2548e-16	5.86537e-16	-0.721478	-1.58322	-1.19796	1.25416	0.779131	0.931574	14	5	7	49	47	41	Bra010945	1	-	-	-	-	-	-
Bra000597	Bra000597.1	-	-	-	-7.03923	-1.24016	68.3484	1.37019e-16	6.39742e-16	-0.269539	-0.66394	-0.174794	-3.54139	-3.54139	-3.54139	20	11	16	0	0	0	Bra000597	1	-	-	-	-	-	-
Bra005002	Bra005002.1	AT2G39920	-	acid phosphatase class B family protein	2.17013	0.297937	68.3055	1.40032e-16	6.53511e-16	-0.812762	-1.58322	-0.899987	0.902338	1.02025	0.862752	13	5	9	38	56	39	Bra005002	1	-	-	-	-	-	-
Bra014462	Bra014462.1	AT2G45570	CYP76C2	CYP76C2;electron carrier/ heme binding / iron ion binding / monooxygenase/ oxygen binding	2.70472	-0.0643	67.7392	1.86621e-16	8.67055e-16	-1.3832	-2.88408	-1.57394	0.789365	0.48947	0.592178	8	1	5	35	38	32	Bra014462	1	-	-	-	-	-	-
Bra020071	Bra020071.1	AT5G19880	-	peroxidase,putative	7.06989	-1.12961	67.5574	2.0464e-16	9.49689e-16	-3.54139	-3.54139	-3.54139	-0.522982	-0.424865	-0.0374006	0	0	0	13	19	20	Bra020071	1	-	-	-	-	-	-
Bra039969	Bra039969.1	AT2G30670	-	tropinone reductase,putative / tropine dehydrogenase,putative	2.79559	-0.161461	67.4033	2.21277e-16	1.02573e-15	-1.87932	-1.58322	-2.08382	0.6235	0.299248	0.752942	5	5	3	31	33	36	Bra039969	1	-	-	-	-	-	-
Bra039087	Bra039087.1	AT5G40780	LTH1	LHT1;amino acid transmembrane transporter	-3.40718	-0.614859	67.2236	2.4239e-16	1.12219e-15	0.0740859	0.107389	0.470821	-2.47601	-2.15438	-2.93993	26	20	26	2	4	1	Bra039087	1	-	-	-	-	-	-
Bra031990	Bra031990.1	AT3G03480	CHAT	CHAT (acetyl CoA:(Z)-3-hexen-1-ol acetyltransferase);acetyl CoA:(Z)-3-hexen-1-ol acetyltransferase	7.13184	-1.0912	67.2	2.45309e-16	1.13558e-15	-3.54139	-3.54139	-3.54139	-0.428841	0.126658	-0.691987	0	0	0	14	29	12	Bra031990	1	-	-	-	-	-	-
Bra021615	Bra021615.1	-	-	-	3.23778	-0.413867	66.8435	2.93938e-16	1.35899e-15	-2.34049	-1.81519	-2.8795	0.220573	0.171779	0.592178	3	4	1	23	30	32	Bra021615	1	-	-	-	-	-	-
Bra020072	Bra020072.1	AT5G19890	-	peroxidase,putative	-2.07445	0.47832	66.7529	3.07759e-16	1.42176e-15	0.903624	1.2425	1.28446	-0.178473	-0.897551	-1.18018	48	46	47	17	13	8	Bra020072	1	-	-	-	-	-	-
Bra009077	Bra009077.1	AT5G09876	-	unknown protein	-2.80456	-0.329546	66.1922	4.09024e-16	1.88316e-15	0.510498	0.559572	0.245978	-1.64151	-2.15438	-1.92362	36	28	22	5	4	4	Bra009077	1	-	-	-	-	-	-
Bra005739	Bra005739.1	AT2G20820	-	unknown protein	-3.2628	-0.570779	65.8291	4.91764e-16	2.25771e-15	0.433144	0.234398	-0.0204941	-2.91251	-1.94722	-2.51671	34	22	18	1	5	2	Bra005739	1	-	-	-	-	-	-
Bra029391	Bra029391.1	AT5G24140	SQP2	SQP2;FAD binding / oxidoreductase/ squalene monooxygenase	-2.03543	0.292848	65.6805	5.30285e-16	2.43209e-15	0.987186	0.941074	0.989795	-1.11622	-0.897551	-0.691987	51	37	38	8	13	12	Bra029391	1	-	-	-	-	-	-
Bra017568	Bra017568.1	AT5G46230	-	unknown protein	2.03976	0.45335	65.1271	7.02202e-16	3.20828e-15	-0.635628	-0.781944	-1.04129	1.38952	0.995361	0.897573	15	10	8	54	55	40	Bra017568	1	-	-	-	-	-	-
Bra009570	Bra009570.1	AT5G02750	-	zinc finger (C3HC4-type RING finger) family protein	3.1858	-0.454822	63.9781	1.2581e-15	5.69632e-15	-3.02241	-1.81519	-2.08382	0.532821	0.126658	0.204282	1	4	3	29	29	24	Bra009570	1	-	-	-	-	-	-
Bra013619	Bra013619.1	AT4G22460	-	protease inhibitor/seed storage/lipid transfer protein (LTP) family protein	-2.86568	-0.382264	63.9622	1.26828e-15	5.74178e-15	0.392853	0.107389	0.665301	-1.86989	-1.94722	-2.1899	33	20	30	4	5	3	Bra013619	1	-	-	-	-	-	-
Bra024499	Bra024499.1	AT2G17660	-	nitrate-responsive NOI protein,putative	-2.23138	0.156891	63.8873	1.31746e-15	5.95977e-15	0.903624	0.824767	0.753519	-0.849043	-1.94722	-0.915531	48	34	32	10	5	10	Bra024499	1	-	-	-	-	-	-
Bra017157	Bra017157.1	AT2G37750	-	unknown protein	-2.96078	-0.188069	63.7555	1.40862e-15	6.36438e-15	0.308731	0.864587	0.521954	-2.14135	-2.39635	-1.18018	31	35	27	3	3	8	Bra017157	1	-	-	-	-	-	-
Bra004629	Bra004629.1	AT2G41620	-	nucleoporin interacting component family protein	-4.27457	-0.890621	63.6087	1.51758e-15	6.8483e-15	-0.40504	-0.0318899	0.362775	-2.91251	-3.54139	-2.51671	18	18	24	1	0	2	Bra004629	1	-	-	-	-	-	-
Bra026193	Bra026193.1	AT1G14730	-	LOCATED IN: endomembrane system,integral to membrane;EXPRESSED IN: 16 plant structures;EXPRESSED DURING: 7 growth stages;CONTAINS InterPro DOMAIN/s: Cytochrome b561,eukaryote (InterPro:IPR004877),Cytochrome b561/ferric reductase transmembrane (InterPro:IPR006593);BEST Arabidopsis thaliana protein match is: ACYB-1;carbon-monoxide oxygenase (TAIR:AT5G38630.1);Has 447 Blast hits to 446 proteins in 7…	-2.0329	0.250237	63.508	1.59717e-15	7.20028e-15	0.845101	1.14885	0.795684	-0.849043	-0.722211	-1.33326	46	43	33	10	15	7	Bra026193	1	-	-	-	-	-	-
Bra006366	Bra006366.1	AT5G48380	-	leucine-rich repeat family protein / protein kinase family protein	2.30562	0.0725738	63.1926	1.8745e-15	8.43371e-15	-1.3832	-1.05157	-1.57394	0.865655	0.52468	0.827069	8	8	5	37	39	38	Bra006366	1	-	-	-	-	-	-
Bra040141	Bra040141.1	AT3G04300	-	FUNCTIONS IN: molecular_function unknown;INVOLVED IN: biological_process unknown;LOCATED IN: cellular_component unknown;CONTAINS InterPro DOMAIN/s: Cupin,RmlC-type (InterPro:IPR011051),Protein of unknown function DUF861,cupin-3 (InterPro:IPR008579),RmlC-like jelly roll fold (InterPro:IPR014710);BEST Arabidopsis thaliana protein match is: unknown protein (TAIR:AT4G10300.1);Has 364 Blast hits to 36…	2.44442	0.0506092	62.9902	2.07739e-15	9.33416e-15	-1.3832	-1.81519	-1.19796	0.708815	0.944265	0.411228	8	4	7	33	53	28	Bra040141	1	-	-	-	-	-	-
Bra036346	Bra036346.1	AT3G26170	CYP71B19	CYP71B19;electron carrier/ heme binding / iron ion binding / monooxygenase/ oxygen binding	2.26459	0.100559	62.8928	2.18268e-15	9.79965e-15	-1.3832	-1.58322	-0.899987	0.578873	0.807999	0.827069	8	5	9	30	48	38	Bra036346	1	-	-	-	-	-	-
Bra021903	Bra021903.1	AT2G34340	-	unknown protein	2.63438	-0.120794	62.6968	2.41111e-15	1.08086e-14	-1.69433	-2.88408	-1.19796	0.578873	0.52468	0.549024	6	1	7	30	39	31	Bra021903	1	-	-	-	-	-	-
Bra023345	Bra023345.1	AT5G11820	-	FUNCTIONS IN: molecular_function unknown;INVOLVED IN: biological_process unknown;LOCATED IN: endomembrane system;EXPRESSED IN: pollen tube;CONTAINS InterPro DOMAIN/s: Plant self-incompatibility S1 (InterPro:IPR010264);BEST Arabidopsis thaliana protein match is: unknown protein (TAIR:AT5G26050.1);Has 18 Blast hits to 17 proteins in 4 species: Archae - 0;Bacteria - 0;Metazoa - 0;Fungi - 0;Plants - …	-6.91169	-1.34264	62.6924	2.41652e-15	1.08316e-14	-0.269539	-0.554863	-0.653145	-3.54139	-3.54139	-3.54139	20	12	11	0	0	0	Bra023345	1	-	-	-	-	-	-
Bra023883	Bra023883.1	AT3G21460	-	electron carrier/ protein disulfide oxidoreductase	2.63109	-0.0213642	62.6913	2.41784e-15	1.08363e-14	-1.69433	-1.38344	-1.80647	0.332335	0.944265	0.592178	6	6	4	25	53	32	Bra023883	1	-	-	-	-	-	-
Bra019745	Bra019745.1	AT1G12110	NRT1.1,CHL1-1,NRT1,B-1,ATNRT1,CHL1	NRT1.1;nitrate transmembrane transporter/ transporter	2.84023	-0.205837	62.3227	2.91544e-15	1.30392e-14	-3.02241	-1.58322	-1.57394	0.48525	0.52468	0.362208	1	5	5	28	39	27	Bra019745	1	-	-	-	-	-	-
Bra031895	Bra031895.1	AT5G64890	PROPEP2	PROPEP2 (Elicitor peptide 2 precursor)	-3.87506	-0.654181	62.122	3.2283e-15	1.44068e-14	0.510498	-0.453457	0.305558	-2.47601	-2.39635	-3.54139	36	13	23	2	3	0	Bra031895	1	-	-	-	-	-	-
Bra003426	Bra003426.1	AT3G60750	-	transketolase,putative	2.66286	-0.0699088	62.0754	3.30554e-15	1.4745e-14	-1.69433	-3.54139	-1.19796	0.48525	0.559051	0.674798	6	0	7	28	40	34	Bra003426	1	-	-	-	-	-	-
Bra033130	Bra033130.1	AT4G11780	-	unknown protein	-2.13887	0.103645	61.7792	3.84212e-15	1.71011e-14	0.903624	0.510216	0.915254	-1.11622	-1.09719	-1.18018	48	27	36	8	11	8	Bra033130	1	-	-	-	-	-	-
Bra010711	Bra010711.1	AT3G29680	-	transferase family protein	2.00917	0.315009	61.4025	4.65211e-15	2.06363e-14	-0.812762	-0.66394	-1.37374	0.938112	0.970039	0.862752	13	11	6	39	54	39	Bra010711	1	-	-	-	-	-	-
Bra030170	Bra030170.1	AT1G29740	-	kinase	2.82889	-0.262545	61.3851	4.69353e-15	2.08133e-14	-1.3832	-2.88408	-2.08382	0.332335	0.453379	0.458637	8	1	3	25	37	29	Bra030170	1	-	-	-	-	-	-
Bra002059	Bra002059.1	AT2G21045	-	INVOLVED IN: aging;EXPRESSED IN: hypocotyl,root;CONTAINS InterPro DOMAIN/s: Rhodanese-like (InterPro:IPR001763);BEST Arabidopsis thaliana protein match is: unknown protein (TAIR:AT5G66170.2);Has 1919 Blast hits to 1917 proteins in 542 species: Archae - 34;Bacteria - 1258;Metazoa - 17;Fungi - 21;Plants - 115;Viruses - 0;Other Eukaryotes - 474 (source: NCBI BLink).	-3.6691	-0.620525	61.3054	4.88734e-15	2.16514e-14	0.0740859	0.234398	0.118886	-3.54139	-2.68725	-1.69891	26	22	20	0	2	5	Bra002059	1	-	-	-	-	-	-
Bra017797	Bra017797.1	AT4G37150	ATMES9,MES9	MES9 (METHYL ESTERASE 9);hydrolase,acting on ester bonds / methyl indole-3-acetate esterase/ methyl jasmonate esterase/ methyl salicylate esterase	3.75205	-0.524314	61.089	5.45515e-15	2.41092e-14	-1.87932	-2.88408	-3.54139	0.0994213	0.171779	0.204282	5	1	0	21	30	24	Bra017797	1	-	-	-	-	-	-
Bra018803	Bra018803.1	AT3G14690	CYP72A15	CYP72A15;electron carrier/ heme binding / iron ion binding / monooxygenase/ oxygen binding	6.92403	-1.25044	60.8572	6.13678e-15	2.70717e-14	-3.54139	-3.54139	-3.54139	-0.623697	-0.178453	-0.691987	0	0	0	12	23	12	Bra018803	1	-	-	-	-	-	-
Bra032778	Bra032778.1	-	-	-	5.22817	-1.04546	60.7934	6.3389e-15	2.79451e-14	-3.54139	-3.54139	-2.8795	-0.340468	0.0800794	-0.691987	0	0	1	15	28	12	Bra032778	1	-	-	-	-	-	-
Bra012315	Bra012315.1	AT1G22230	-	unknown protein	2.49375	0.00708826	59.2648	1.37818e-14	6.01255e-14	-1.3832	-3.54139	-1.19796	0.578873	0.48947	0.827069	8	0	7	30	38	38	Bra012315	1	-	-	-	-	-	-
Bra018725	Bra018725.1	AT5G02500	HSC70-1,HSP70-1,AT-HSC70-1,HSC70	HSC70-1 (HEAT SHOCK COGNATE PROTEIN 70-1);ATP binding	4.07512	-0.883825	59.1703	1.44597e-14	6.30423e-14	-3.02241	-2.43419	-3.54139	-0.257198	0.126658	-0.327883	1	2	0	16	29	16	Bra018725	1	-	-	-	-	-	-
Bra039755	Bra039755.1	AT1G07440	-	tropinone reductase,putative / tropine dehydrogenase,putative	2.02913	0.238531	58.9291	1.63454e-14	7.10888e-14	-0.812762	-1.58322	-0.771293	1.0404	0.836302	0.674798	13	5	10	42	49	34	Bra039755	1	-	-	-	-	-	-
Bra028798	Bra028798.1	-	-	-	3.76913	-0.806617	58.9267	1.63659e-14	7.11702e-14	-3.02241	-2.43419	-2.8795	-0.178473	-0.178453	0.204282	1	2	1	17	23	24	Bra028798	1	-	-	-	-	-	-
Bra007259	Bra007259.1	AT3G56630	CYP94D2	CYP94D2;electron carrier/ heme binding / iron ion binding / monooxygenase/ oxygen binding	2.87608	-0.426846	58.6291	1.90378e-14	8.25163e-14	-2.64153	-1.81519	-1.80647	0.436058	0.126658	0.311463	2	4	4	27	29	26	Bra007259	1	-	-	-	-	-	-
Bra021670	Bra021670.1	AT2G25450	-	2-oxoglutarate-dependent dioxygenase,putative	-6.8089	-1.42079	58.3735	2.16794e-14	9.36963e-14	-0.635628	-0.269808	-0.771293	-3.54139	-3.54139	-3.54139	15	15	10	0	0	0	Bra021670	1	-	-	Glucosinolate genes	-	-	-
Bra020706	Bra020706.1	AT2G15080	AtRLP19	AtRLP19 (Receptor Like Protein 19);kinase/ protein binding	6.86374	-1.29471	58.3371	2.20838e-14	9.54237e-14	-3.54139	-3.54139	-3.54139	-0.257198	-0.807219	-0.410661	0	0	0	16	14	15	Bra020706	1	-	-	-	-	-	-
Bra001824	Bra001824.1	-	-	-	-2.75782	-0.465069	58.2817	2.27149e-14	9.81192e-14	0.172569	0.293942	0.470821	-2.14135	-1.76611	-2.1899	28	23	26	3	6	3	Bra001824	1	-	-	-	-	-	-
Bra017373	Bra017373.1	AT2G03760	ST,ATST1,RAR047,ST1	ST;brassinosteroid sulfotransferase/ sulfotransferase	-3.79771	-0.953793	57.9847	2.64169e-14	1.1376e-13	0.022203	-0.106919	-0.347594	-2.47601	-3.05201	-2.93993	25	17	14	2	1	1	Bra017373	1	-	-	-	-	-	-
Bra004447	Bra004447.1	AT2G47550	-	pectinesterase family protein	-2.38946	-0.110143	57.9663	2.66643e-14	1.14777e-13	0.392853	0.653492	0.795684	-1.64151	-0.99392	-2.1899	33	30	33	5	12	3	Bra004447	1	-	-	-	-	-	-
Bra007639	Bra007639.1	AT3G61900	-	auxin-responsive family protein	3.61376	-0.671748	57.8351	2.85043e-14	1.22581e-13	-3.02241	-2.88408	-2.08382	-0.428841	0.299248	0.204282	1	1	3	14	33	24	Bra007639	1	-	Auxin genes	-	-	-	-
Bra012283	Bra012283.1	AT1G21520	-	unknown protein	4.61398	-0.731296	57.6661	3.10604e-14	1.33418e-13	-2.34049	-3.54139	-3.54139	-0.522982	0.171779	0.0884959	3	0	0	13	30	22	Bra012283	1	-	-	-	-	-	-
Bra028098	Bra028098.1	AT2G18570	-	UDP-glucoronosyl/UDP-glucosyl transferase family protein	-2.27906	0.00421079	57.3705	3.60982e-14	1.54731e-13	0.959866	0.559572	0.521954	-0.976457	-1.94722	-1.0418	50	28	27	9	5	9	Bra028098	1	-	-	-	-	-	-
Bra035797	Bra035797.1	AT3G20270	-	lipid-binding serum glycoprotein family protein	2.95071	-0.49978	57.3121	3.71856e-14	1.59342e-13	-2.09155	-1.81519	-2.8795	0.161269	0.215532	0.258868	4	4	1	22	31	25	Bra035797	1	-	-	-	-	-	-
Bra001892	Bra001892.1	AT3G22930	-	calmodulin,putative	4.61527	-0.920635	57.2442	3.84928e-14	1.64822e-13	-3.54139	-2.88408	-2.8795	0.277536	-0.0178469	-0.915531	0	1	1	24	26	10	Bra001892	1	-	-	-	-	-	-
Bra031657	Bra031657.1	AT1G09080	BIP3	BIP3;ATP binding	-3.5257	-0.452382	56.9712	4.42251e-14	1.8887e-13	0.124168	0.783817	0.118886	-1.44439	-3.05201	-2.51671	27	33	20	6	1	2	Bra031657	1	-	-	-	-	-	-
Bra016011	Bra016011.1	AT1G73220	AtOCT1	AtOCT1 (Arabidopsis thaliana ORGANIC CATION/CARNITINE TRANSPORTER1);carbohydrate transmembrane transporter/ carnitine transporter/ transporter	-3.552	-0.893981	56.694	5.09179e-14	2.17058e-13	-0.0875197	-0.0318899	-0.095582	-2.47601	-2.68725	-2.93993	23	18	17	2	2	1	Bra016011	1	-	-	-	-	-	-
Bra004793	Bra004793.1	AT2G43940	-	thiol methyltransferase,putative	6.92669	-1.28612	56.2847	6.27e-14	2.664e-13	-3.54139	-3.54139	-3.54139	-0.976457	0.0319469	-0.591991	0	0	0	9	27	13	Bra004793	1	-	-	-	-	-	-
Bra009759	Bra009759.1	AT5G24410	-	glucosamine/galactosamine-6-phosphate isomerase-related	-3.80548	-0.782351	56.2647	6.3341e-14	2.69067e-13	-0.0875197	0.653492	-0.174794	-2.91251	-2.15438	-3.54139	23	30	16	1	4	0	Bra009759	1	-	-	-	-	-	-
Bra016391	Bra016391.1	AT1G22030	-	unknown protein	2.42827	-0.186896	56.1431	6.73827e-14	2.85967e-13	-1.5304	-1.38344	-2.08382	0.332335	0.62543	0.411228	7	6	3	25	42	28	Bra016391	1	-	-	-	-	-	-
Bra023467	Bra023467.1	AT5G14480	-	glycosyl transferase family 17 protein	-2.33573	-0.20469	56.0583	7.0355e-14	2.98364e-13	0.510498	0.45911	0.571336	-1.44439	-2.15438	-1.0418	36	26	28	6	4	9	Bra023467	1	-	-	-	-	-	-
Bra039929	Bra039929.1	AT1G78500	-	pentacyclic triterpene synthase,putative	-4.03669	-1.07743	55.561	9.06017e-14	3.83029e-13	-0.335699	-0.269808	-0.095582	-3.54139	-3.05201	-2.51671	19	15	17	0	1	2	Bra039929	1	-	-	-	-	-	-
Bra039556	Bra039556.1	AT5G47980	-	transferase family protein	3.34083	-0.352262	55.2088	1.08383e-13	4.56872e-13	-3.02241	-0.910466	-2.42749	-0.0328451	0.453379	0.311463	1	9	2	19	37	26	Bra039556	1	-	-	-	-	-	-
Bra010474	Bra010474.1	AT4G25140	OLEO1,OLE1	OLEO1 (OLEOSIN 1)	2.32063	-0.0183283	55.1641	1.10876e-13	4.67091e-13	-1.87932	-0.781944	-1.57394	0.436058	0.52468	0.827069	5	10	5	27	39	38	Bra010474	1	-	-	-	-	-	-
Bra019096	Bra019096.1	-	-	-	-2.01148	0.150576	54.8418	1.30629e-13	5.4883e-13	1.04032	0.510216	0.795684	-0.976457	-1.20842	-0.799434	53	27	33	9	10	11	Bra019096	1	-	-	-	-	-	-
Bra025024	Bra025024.1	AT5G46295	-	unknown protein	-2.70071	-0.508791	54.7624	1.36019e-13	5.71e-13	0.264756	0.293942	0.183831	-1.44439	-2.15438	-2.51671	30	23	21	6	4	2	Bra025024	1	-	-	-	-	-	-
Bra029612	Bra029612.1	AT3G06970	-	RNA binding / nucleic acid binding / nucleotide binding	-3.96777	-0.918341	54.2888	1.73084e-13	7.23613e-13	-0.0875197	-0.358712	0.795684	-3.54139	-2.68725	-2.51671	23	14	33	0	2	2	Bra029612	1	-	-	-	-	-	-
Bra022179	Bra022179.1	AT3G16800	-	protein phosphatase 2C,putative / PP2C,putative	-2.23448	-0.0910479	54.2651	1.75186e-13	7.32253e-13	0.687478	0.234398	0.836652	-1.271	-1.60522	-1.18018	41	22	34	7	7	8	Bra022179	1	-	-	-	-	-	-
Bra029499	Bra029499.1	AT4G04540	-	protein kinase family protein	5.03793	-1.19719	54.2176	1.79475e-13	7.49715e-13	-3.54139	-3.54139	-2.8795	-0.257198	-0.641935	-0.327883	0	0	1	16	16	16	Bra029499	1	-	-	-	-	-	-
Bra016072	Bra016072.1	AT1G72290	-	trypsin and protease inhibitor family protein / Kunitz family protein	3.73973	-0.828512	54.0416	1.96293e-13	8.19213e-13	-3.02241	-2.88408	-2.42749	-0.340468	0.257997	-0.327883	1	1	2	15	32	16	Bra016072	1	-	-	-	-	-	-
Bra019705	Bra019705.1	AT1G13750	-	calcineurin-like phosphoesterase family protein	3.12135	-0.670506	53.6234	2.42851e-13	1.00927e-12	-3.02241	-2.43419	-1.80647	-0.178473	0.215532	0.0269205	1	2	4	17	31	21	Bra019705	1	-	-	-	-	-	-
Bra025101	Bra025101.1	AT4G19970	-	unknown protein	-2.87978	-0.485964	53.4663	2.63063e-13	1.09194e-12	0.308731	0.293942	0.0508783	-1.271	-2.15438	-2.93993	31	23	19	7	4	1	Bra025101	1	-	-	-	-	-	-
Bra009333	Bra009333.1	AT5G08260	scpl35	scpl35 (serine carboxypeptidase-like 35);serine-type carboxypeptidase	4.35636	-1.08795	53.3223	2.8308e-13	1.17323e-12	-3.02241	-3.54139	-2.8795	-0.428841	-0.069421	-0.591991	1	0	1	14	25	13	Bra009333	1	-	-	-	-	-	-
Bra022199	Bra022199.1	AT3G17130	-	invertase/pectin methylesterase inhibitor family protein	-5.04469	-1.34217	53.2392	2.9531e-13	1.22329e-12	-0.335699	-0.66394	-0.543945	-3.54139	-3.54139	-2.93993	19	11	12	0	0	1	Bra022199	1	-	-	-	-	-	-
Bra022673	Bra022673.1	AT5G53760	MLO11,ATMLO11	MLO11 (MILDEW RESISTANCE LOCUS O 11);calmodulin binding	-2.03968	0.0407199	53.0668	3.22389e-13	1.33316e-12	0.547674	0.941074	0.665301	-1.86989	-1.09719	-0.691987	37	37	30	4	11	12	Bra022673	1	-	-	-	-	-	-
Bra010040	Bra010040.1	-	-	-	-6.6972	-1.50729	52.9375	3.44329e-13	1.42215e-12	-0.635628	-0.781944	-0.543945	-3.54139	-3.54139	-3.54139	15	10	12	0	0	0	Bra010040	1	-	-	-	-	-	-
Bra000074	Bra000074.1	AT2G38600	-	acid phosphatase class B family protein	-2.02046	0.055922	52.1948	5.02586e-13	2.06448e-12	0.510498	0.864587	0.795684	-1.64151	-1.20842	-0.591991	36	35	33	5	10	13	Bra000074	1	-	-	-	-	-	-
Bra002457	Bra002457.1	AT5G60700	-	glycosyltransferase family protein 2	2.05153	0.0526949	52.1899	5.03846e-13	2.06923e-12	-1.24964	-0.910466	-1.37374	0.789365	0.52468	0.714399	9	9	6	35	39	35	Bra002457	1	-	-	-	-	-	-
Bra015304	Bra015304.1	AT1G04330	-	unknown protein	-2.58914	-0.493122	51.8501	5.99029e-13	2.45222e-12	0.022203	0.45911	0.305558	-2.14135	-1.94722	-1.69891	25	26	23	3	5	5	Bra015304	1	-	-	-	-	-	-
Bra009009	Bra009009.1	AT3G28600	-	ATP binding / ATPase/ nucleoside-triphosphatase/ nucleotide binding	-3.66362	-1.05839	51.2662	8.06518e-13	3.28673e-12	-0.0875197	-0.269808	-0.442432	-3.54139	-2.68725	-2.51671	23	15	13	0	2	2	Bra009009	1	-	-	-	-	-	-
Bra006396	Bra006396.1	AT5G17330	GAD,GAD1	GAD;calmodulin binding / glutamate decarboxylase	3.97013	-1.00345	51.1485	8.56367e-13	3.48568e-12	-3.02241	-2.88408	-2.8795	-0.976457	-0.069421	0.0269205	1	1	1	9	25	21	Bra006396	1	-	-	-	-	-	-
Bra029987	Bra029987.1	AT5G43120	-	tetratricopeptide repeat (TPR)-containing protein	2.71949	-0.214166	50.6926	1.08025e-12	4.37945e-12	-1.87932	-2.88408	-1.04129	0.749652	0.257997	0.258868	5	1	8	34	32	25	Bra029987	1	-	-	-	-	-	-
Bra027457	Bra027457.1	AT5G42800	DFR,TT3,M318	DFR (DIHYDROFLAVONOL 4-REDUCTASE);dihydrokaempferol 4-reductase	-3.36428	-0.842528	50.5135	1.18349e-12	4.79128e-12	0.264756	-0.66394	0.0508783	-2.47601	-3.05201	-2.1899	30	11	19	2	1	3	Bra027457	1	-	-	-	Anthocyanin genes	-	-
[truncated: 556 more rows]

## Sheet: TFs
Gene (B. rapa)	ID Pfam	Domain	e-value Pfam	Family	Transcription factor gene-family ABI3/VP1 in B. rapa	logFC
[truncated: 3,567 more rows]

[truncated: 8 more sheets: Gene Families, classified, Sheet5, Sheet6, Sheet7, Sheet8, Sheet9, TF found]
