# Supplementary material for: BrPP5.2 Overexpression Confers Heat Shock Tolerance in Transgenic Brassica rapa through Inherent Chaperone Activity, Induced Glucosinolate Biosynthesis, and Differential Regulation of Abiotic Stress Response Genes
Source: Int J Mol Sci. 2021 Jun 16;22(12):6437. doi: 10.3390/ijms22126437 (PMC8234546; doi:10.3390/ijms22126437)
Supplement: Supplementary file 1 [file ijms-22-06437-s001.zip › Glucosinolate content.xlsx]

## Sheet: Sheet4
Chinese cabbage		GSLs (nmol/g DW)																	Total Aliphatic	Total Indolic	Total GSLs
		Aliphatic												Indolic				Aromatic
Lines	Rep	GIB	PGT	GRA	GIBV	GRE	SIN	GAS	GNA	GNP	GBN	GER	GRH	GBS	4-HGB	4-MTGB	NGB	GNT
DB	1	N.D	196.783	93.0939	N.D	N.D	N.D	68.5525	N.D	1853.44	5382.83	29.0729	N.D	5823.33	14.3592	683.637	3875.97	212.822	7623.78	6734.15	18233.9
	2	N.D	197.727	89.9961	N.D	N.D	N.D	71.2611	N.D	1505.96	5367.58	29.0438	N.D	5746.68	12.9953	680.973	3807.29	211.54	7261.57	6652.19	17721.1
Average		N.D	197.255	91.545	N.D	N.D	N.D	69.9068	N.D	1679.7	5375.21	29.0583	N.D	5785.01	13.6773	682.305	3841.63	212.181	7442.67	6693.17	17977.5
Standard Deviation																		0.906555	256.121	57.9529	362.633
BrPP5OX1	1	N.D	161.949	74.8238	N.D	N.D	N.D	69.9906	N.D	1403.01	5848.12	24.145	N.D	5891.02	15.4957	706.222	5005.15	534.145	7582.04	7146.88	19734.1
	2	N.D	161.767	67.778	N.D	N.D	N.D	60.6501	N.D	1356.32	5531.06	23.5781	N.D	5818.59	13.6098	702.061	4945.48	474.183	7201.16	7008.45	19155.1
Average		N.D	161.858	71.3009	N.D	N.D	N.D	65.3203	N.D	1379.67	5689.59	23.8615	N.D	5854.81	14.5527	704.142	4975.32	504.164	7391.6	7077.66	19444.6
Standard Deviation																		42.3996	269.325	97.8862	409.408
BrPP5OX3	1	N.D	164.926	645.411	N.D	N.D	N.D	76.8458	690.043	656.943	4865.66	51.9387	N.D	6898.3	9.96227	696.331	6843.59	666.516	7151.76	8271.11	22266.5
	2	N.D	178.41	668.748	N.D	N.D	N.D	80.2665	738.497	680.051	4953.88	51.9096	N.D	6928.42	10.1434	709.443	6894.75	702.65	7351.76	8350.66	22597.2
Average		N.D	171.668	657.079	N.D	N.D	N.D	78.5561	714.27	668.497	4909.77	51.9241	N.D	6913.36	10.0528	702.887	6869.17	684.583	7251.76	8310.88	22431.8
Standard Deviation																		25.5509	141.419	56.2526	233.852
Chinese cabbage		GSLs (nmol/g DW)																	Total Aliphatic	Total Indolic	Total GSLs
		Aliphatic												Indolic				Aromatic
Lines	Rep	GIB	PGT	GRA	GIBV	GRE	SIN	GAS	GNA	GNP	GBN	GER	GRH	GBS	4-HGB	4-MTGB	NGB	GNT
DB-H	1	N.D	180.782	70.1266	N.D	N.D	N.D	75.3798	N.D	1353.65	4161.37	26.5581	N.D	4906.8	15.4282	533.027	4255.8	178.339	5867.87	5633.6	15757.3
	2	N.D	158.547	60.7322	N.D	N.D	N.D	64.1964	N.D	1299.38	3874.37	25.6713	N.D	4849.14	13.2084	532.115	4188.69	156.451	5482.89	5550.92	15222.5
Average		N.D	169.665	65.4294	N.D	N.D	N.D	69.7881	N.D	1326.51	4017.87	26.1147	N.D	4877.97	14.3183	532.571	4222.25	167.395	5675.38	5592.26	15489.9
Standard Deviation																		15.4769	272.226	58.4629	378.149
BrPP5OX1-H	1	N.D	163.776	67.3746	N.D	N.D	N.D	69.9208	N.D	1565.04	6711.56	28.0844	N.D	6532.87	12.9527	721.591	5321.66	539.139	8605.76	7806.55	21734
	2	N.D	168.654	62.6774	N.D	N.D	N.D	69.9906	N.D	1473.88	6599.92	26.8342	N.D	6436.39	11.1236	706.297	5252.9	505.032	8401.96	7658.84	21313.7
Average		N.D	166.215	65.026	N.D	N.D	N.D	69.9557	N.D	1519.46	6655.74	27.4593	N.D	6484.63	12.0382	713.944	5287.28	522.086	8503.86	7732.7	21523.8
Standard Deviation																		24.1169	144.109	104.445	297.173
BrPP5OX3-H	1	N.D	153.367	483.768	N.D	N.D	N.D	74.7655	527.117	525.732	3954.68	35.8178	N.D	6580.39	6.69124	600.311	5372.23	636.021	5755.25	7823.41	18950.9
	2	N.D	162.554	449.129	N.D	N.D	N.D	68.6223	468.838	478.978	3661.81	31.2679	N.D	6450.93	6.4959	539.476	5352.12	577.06	5321.2	7573.96	18247.3
Average		N.D	157.96	466.449	N.D	N.D	N.D	71.6939	497.978	502.355	3808.25	33.5428	N.D	6515.66	6.59357	569.894	5362.18	606.541	5538.22	7698.69	18599.1
Standard Deviation																		41.6916	306.924	176.392	497.535
Abbreviation:				N.D= not detecetd
GIB	Glucoiberin			DB-control
PGT	Progoitrin			BrPP5OX1,3- transgenic B. rapa lines overexpressing BrPP5.2 gene
GRA	Glucoraphanin			BrPP5OX1-H,3-H= heat stressed transgenic B. rapa lines overexpressing BrPP5.2 gene
GIBV	Glucoiberverin			DB-H= heat stressed wild control
GRE	Glucoraphenin
SIN	Sinigrin
GAS	Glucoalyssin
GNA	Gluconapoleiferin
GNP	Gluconapin
GBN	Glucobrassicanapin
GER	Glucoerucin
GRH	Glucoraphsatin
GBS	Glucobrassicin
4-HGB	4-Hydroxyglucobrassicin
4-MTGB	4-Methoxyglucobrassicin
NGB	Neoglucobrassicin
GNT	Gluconasturtiin
N.D	Not Detected
