# Supplementary material for: BrPP5.2 Overexpression Confers Heat Shock Tolerance in Transgenic Brassica rapa through Inherent Chaperone Activity, Induced Glucosinolate Biosynthesis, and Differential Regulation of Abiotic Stress Response Genes
Source: Int J Mol Sci. 2021 Jun 16;22(12):6437. doi: 10.3390/ijms22126437 (PMC8234546; doi:10.3390/ijms22126437)
Supplement: Supplementary file 1 [file ijms-22-06437-s001.zip › Master file.xlsx]

## Sheet: 2nd cuff diff
test_id	gene_id	gene	locus	sample_1	sample_2	status	value_1	value_2	log2(fold_change)	test_stat	p_value	q_value	significant
gene:Bra000001	gene:Bra000001	-	A03:8774510-8777095	DB-control	PP5_OX	NOTEST	0.436314	0.240904	-0.856908	0	1	1	no
gene:Bra009596	gene:Bra009596	-	A10:17372181-17375267	DB-control	PP5_OX	OK	5.58719	4.84335	-0.206119	-1.22121	0.0339	0.0498207	yes
gene:Bra018412	gene:Bra018412	-	A05:8079549-8084832	DB-control	PP5_OX	OK	1.78825	1.27602	-0.486896	-1.20862	0.03385	0.04975	yes
gene:Bra000004	gene:Bra000004	-	A03:8796857-8797232	DB-control	PP5_OX	OK	4.89427	6.9014	0.495795	1.02734	0.0791	0.108087	no
gene:Bra000005	gene:Bra000005	-	A03:8798080-8800123	DB-control	PP5_OX	OK	57.8961	53.9508	-0.101822	-0.914368	0.1162	0.152934	no
gene:Bra000006	gene:Bra000006	-	A03:8800738-8801050	DB-control	PP5_OX	OK	208.679	204.556	-0.0287849	-0.317735	0.5819	0.63369	no
gene:Bra000007	gene:Bra000007	-	A03:8803496-8804207	DB-control	PP5_OX	OK	2.77894	2.18634	-0.346018	-0.764073	0.2033	0.25184	no
gene:Bra039281	gene:Bra039281	-	A04:18766856-18768314	DB-control	PP5_OX	OK	0.728732	0.182159	-2.00019	-1.79956	0.03385	0.04975	yes
gene:Bra011190	gene:Bra011190	-	A01:3410409-3410952	DB-control	PP5_OX	OK	6.73369	8.65879	0.362769	1.23855	0.0338	0.0496821	yes
gene:Bra000010	gene:Bra000010	-	A03:8820534-8822281	DB-control	PP5_OX	NOTEST	0.388639	0.287747	-0.43363	0	1	1	no
gene:Bra015952	gene:Bra015952	-	A07:20079339-20082621	DB-control	PP5_OX	OK	27.5357	25.51	-0.110238	-1.2238	0.0338	0.0496821	yes
gene:Bra011721	gene:Bra011721	-	A01:875240-881972	DB-control	PP5_OX	OK	1.41327	1.15393	-0.292487	-1.23261	0.03375	0.0496141	yes
gene:Bra021847	gene:Bra021847	-	A04:14854156-14856109	DB-control	PP5_OX	OK	191.085	209.989	0.136095	1.21456	0.03375	0.0496141	yes
gene:Bra000014	gene:Bra000014	-	A03:8845883-8849125	DB-control	PP5_OX	NOTEST	0.011145	0.0336626	1.59474	0	1	1	no
gene:Bra000015	gene:Bra000015	-	A03:8851534-8852845	DB-control	PP5_OX	OK	80.864	77.9529	-0.0528957	-0.475346	0.41395	0.471133	no
gene:Bra000016	gene:Bra000016	-	A03:8864292-8866197	DB-control	PP5_OX	NOTEST	0	0	0	0	1	1	no
gene:Bra005535	gene:Bra005535	-	A05:6055792-6058794	DB-control	PP5_OX	OK	2.14534	1.6722	-0.359464	-1.23939	0.0337	0.0495462	yes
gene:Bra025019	gene:Bra025019	-	A06:24721798-24725827	DB-control	PP5_OX	OK	7.97918	7.28627	-0.131059	-1.21585	0.0337	0.0495462	yes
gene:Bra010237	gene:Bra010237	-	A08:13350155-13353622	DB-control	PP5_OX	OK	11.8355	10.7045	-0.1449	-1.22703	0.03365	0.0494782	yes
gene:Bra000020	gene:Bra000020	-	A03:8877927-8878629	DB-control	PP5_OX	NOTEST	0	0	0	0	1	1	no
gene:Bra018137	gene:Bra018137	-	A06:10508029-10509238	DB-control	PP5_OX	OK	89.5942	81.4259	-0.137917	-1.21648	0.03365	0.0494782	yes
gene:Bra000022	gene:Bra000022	-	A03:8883597-8884350	DB-control	PP5_OX	OK	0.87334	0.430593	-1.02022	-1.09882	0.10175	0.135636	no
gene:Bra000023	gene:Bra000023	-	A03:8888064-8891662	DB-control	PP5_OX	OK	12.098	12.2988	0.0237464	0.239367	0.67895	0.72368	no
gene:Bra029058	gene:Bra029058	-	A03:6105776-6106504	DB-control	PP5_OX	OK	42.6192	55.3565	0.377248	1.25614	0.03365	0.0494782	yes
gene:Bra000025	gene:Bra000025	-	A03:8896061-8896808	DB-control	PP5_OX	NOTEST	0.17585	0.0272244	-2.69137	0	1	1	no
gene:Bra000026	gene:Bra000026	-	A03:8897178-8899098	DB-control	PP5_OX	OK	2.45414	2.5069	0.030691	0.0868482	0.87425	0.894799	no
gene:Bra001222	gene:Bra001222	-	A03:15405430-15406303	DB-control	PP5_OX	OK	1.15433	0.597164	-0.950861	-1.33261	0.0336	0.049413	yes
gene:Bra019450	gene:Bra019450	-	A06:13573559-13575854	DB-control	PP5_OX	OK	0.643909	1.5662	1.28234	1.55137	0.0336	0.049413	yes
gene:Bra040141	gene:Bra040141	-	A01:28459172-28459549	DB-control	PP5_OX	OK	0.63393	6.24694	3.30075	2.63901	0.0336	0.049413	yes
gene:Bra000030	gene:Bra000030	-	A03:8912912-8914283	DB-control	PP5_OX	OK	3.63761	4.45898	0.293723	0.885528	0.13045	0.169631	no
gene:Bra007177	gene:Bra007177	-	A09:27758360-27761297	DB-control	PP5_OX	OK	8.30972	0.0592221	-7.13252	-4.03681	0.03355	0.0493477	yes
gene:Bra000032	gene:Bra000032	-	A03:8919970-8920207	DB-control	PP5_OX	OK	27.5634	29.1049	0.0785059	0.218735	0.70545	0.747526	no
gene:Bra000033	gene:Bra000033	-	A03:8921847-8925170	DB-control	PP5_OX	NOTEST	0.170253	0.0956304	-0.832139	0	1	1	no
gene:Bra033483	gene:Bra033483	-	A04:4537672-4538389	DB-control	PP5_OX	OK	28.3158	31.4307	0.150566	1.21978	0.0335	0.049277	yes
gene:Bra033537	gene:Bra033537	-	A01:11273830-11275586	DB-control	PP5_OX	OK	9.71562	6.81831	-0.510892	-1.25381	0.0335	0.049277	yes
gene:Bra034265	gene:Bra034265	-	A04:11498085-11500885	DB-control	PP5_OX	OK	1.05719	1.3797	0.384114	1.25022	0.0335	0.049277	yes
gene:Bra004415	gene:Bra004415	-	A05:22479-23004	DB-control	PP5_OX	OK	2.23371	1.16408	-0.940259	-1.36511	0.03345	0.0492117	yes
gene:Bra000038	gene:Bra000038	-	A03:8962374-8964291	DB-control	PP5_OX	OK	3.09925	3.70366	0.257032	0.827503	0.15475	0.197724	no
gene:Bra014647	gene:Bra014647	-	A04:1993864-1999992	DB-control	PP5_OX	OK	2.86294	2.50484	-0.192782	-1.24783	0.03345	0.0492117	yes
gene:Bra000040	gene:Bra000040	-	A03:8976198-8976481	DB-control	PP5_OX	NOTEST	0	0	0	0	1	1	no
gene:Bra000041	gene:Bra000041	-	A03:8979654-8981563	DB-control	PP5_OX	NOTEST	0.0685483	0	#NAME?	0	1	1	no
gene:Bra029657	gene:Bra029657	-	A05:22780392-22781752	DB-control	PP5_OX	OK	24.7759	22.381	-0.146661	-1.2364	0.03345	0.0492117	yes
gene:Bra003455	gene:Bra003455	-	A07:13282105-13283551	DB-control	PP5_OX	OK	35.8112	32.5124	-0.139421	-1.23181	0.0334	0.0491464	yes
gene:Bra031088	gene:Bra031088	-	A09:32524557-32527831	DB-control	PP5_OX	OK	3.81232	2.48182	-0.619266	-1.24233	0.0334	0.0491464	yes
gene:Bra005365	gene:Bra005365	-	A05:5038466-5040802	DB-control	PP5_OX	OK	7.42636	8.26323	0.154051	1.2248	0.0333	0.0490047	yes
gene:Bra026502	gene:Bra026502	-	A01:8963613-8964252	DB-control	PP5_OX	OK	3.60912	4.90211	0.441755	1.22979	0.0333	0.0490047	yes
gene:Bra031635	gene:Bra031635	-	A09:35472892-35474509	DB-control	PP5_OX	OK	7.06127	6.15527	-0.198105	-1.23964	0.0333	0.0490047	yes
gene:Bra000048	gene:Bra000048	-	A03:9026052-9029341	DB-control	PP5_OX	NOTEST	0.0498928	0.0488845	-0.0294557	0	1	1	no
gene:Bra000049	gene:Bra000049	-	A03:9031908-9032091	DB-control	PP5_OX	NOTEST	0	0	0	0	1	1	no
gene:Bra000050	gene:Bra000050	-	A03:9035243-9038277	DB-control	PP5_OX	NOTEST	0	0	0	0	1	1	no
gene:Bra000051	gene:Bra000051	-	A03:9054360-9054600	DB-control	PP5_OX	NOTEST	0	0	0	0	1	1	no
gene:Bra036672	gene:Bra036672	-	A09:5719781-5722591	DB-control	PP5_OX	OK	2.7256	2.14225	-0.347446	-1.22412	0.0333	0.0490047	yes
gene:Bra001241	gene:Bra001241	-	A03:15484111-15485440	DB-control	PP5_OX	OK	5.91204	4.53728	-0.381828	-1.27958	0.03325	0.0489421	yes
gene:Bra000054	gene:Bra000054	-	A03:9083926-9085020	DB-control	PP5_OX	OK	0.44368	0.845159	0.929703	0.921962	0.1755	0.220925	no
gene:Bra000055	gene:Bra000055	-	A03:9092183-9094770	DB-control	PP5_OX	OK	31.1441	33.1059	0.0881296	1.11499	0.05555	0.0782444	no
gene:Bra034308	gene:Bra034308	-	A04:11810644-11812588	DB-control	PP5_OX	OK	36.6301	40.3404	0.139196	1.23922	0.03325	0.0489421	yes
gene:Bra036354	gene:Bra036354	-	A02:22843274-22844960	DB-control	PP5_OX	OK	12.1826	10.7859	-0.175677	-1.2684	0.03325	0.0489421	yes
gene:Bra003612	gene:Bra003612	-	A07:14065355-14066178	DB-control	PP5_OX	OK	18.1006	14.2217	-0.347946	-1.23042	0.0332	0.0488767	yes
gene:Bra000059	gene:Bra000059	-	A03:9107403-9109415	DB-control	PP5_OX	NOTEST	0	0.0886544	inf	0	1	1	no
gene:Bra010435	gene:Bra010435	-	A08:14522286-14525525	DB-control	PP5_OX	OK	3.77592	3.15485	-0.259255	-1.22272	0.0332	0.0488767	yes
gene:Bra000061	gene:Bra000061	-	A03:9117430-9117883	DB-control	PP5_OX	NOTEST	0	0	0	0	1	1	no
gene:Bra015284	gene:Bra015284	-	A10:2713825-2714290	DB-control	PP5_OX	OK	8.49662	6.20411	-0.453666	-1.24614	0.0332	0.0488767	yes
gene:Bra025837	gene:Bra025837	-	A06:8329723-8333111	DB-control	PP5_OX	OK	8.70784	9.68761	0.153826	1.23754	0.0332	0.0488767	yes
gene:Bra000930	gene:Bra000930	-	A03:13991793-13993727	DB-control	PP5_OX	OK	2.95984	3.6109	0.286839	1.23567	0.03315	0.0488141	yes
gene:Bra023422	gene:Bra023422	-	A02:3307547-3309940	DB-control	PP5_OX	OK	5.06682	4.42407	-0.195707	-1.21126	0.03315	0.0488141	yes
gene:Bra000066	gene:Bra000066	-	A03:9134073-9135366	DB-control	PP5_OX	NOTEST	0.0551104	0.0805124	0.546886	0	1	1	no
gene:Bra000067	gene:Bra000067	-	A03:9138872-9140525	DB-control	PP5_OX	NOTEST	0.0668629	0.0225976	-1.56504	0	1	1	no
gene:Bra000068	gene:Bra000068	-	A03:9141968-9142355	DB-control	PP5_OX	NOTEST	0	0	0	0	1	1	no
gene:Bra000069	gene:Bra000069	-	A03:9143565-9144845	DB-control	PP5_OX	OK	9.24362	9.1161	-0.0200419	-0.124215	0.82955	0.856796	no
gene:Bra000070	gene:Bra000070	-	A03:9145382-9146991	DB-control	PP5_OX	OK	7.34368	6.26442	-0.229321	-1.13876	0.04835	0.0688713	no
gene:Bra035702	gene:Bra035702	-	A04:12706909-12707257	DB-control	PP5_OX	OK	6.55012	9.57562	0.547844	1.2512	0.03315	0.0488141	yes
gene:Bra000072	gene:Bra000072	-	A03:9152115-9153095	DB-control	PP5_OX	NOTEST	0	0.0872035	inf	0	1	1	no
gene:Bra037725	gene:Bra037725	-	A04:18053679-18056337	DB-control	PP5_OX	OK	1.41642	0.994229	-0.510602	-1.23807	0.03315	0.0488141	yes
gene:Bra033657	gene:Bra033657	-	A06:25777293-25779371	DB-control	PP5_OX	OK	226.571	248.15	0.13125	1.22855	0.0331	0.0487514	yes
gene:Bra008411	gene:Bra008411	-	A02:15441245-15442801	DB-control	PP5_OX	OK	15.5262	17.3943	0.163908	1.23809	0.03305	0.0486805	yes
gene:Bra000076	gene:Bra000076	-	A03:9171301-9173171	DB-control	PP5_OX	NOTEST	0	0	0	0	1	1	no
gene:Bra000077	gene:Bra000077	-	A03:9174188-9175410	DB-control	PP5_OX	OK	4.62816	3.7778	-0.292894	-0.999986	0.0789	0.107831	no
gene:Bra000078	gene:Bra000078	-	A03:9175874-9176117	DB-control	PP5_OX	NOTEST	0	0	0	0	1	1	no
gene:Bra016867	gene:Bra016867	-	A04:17819911-17822296	DB-control	PP5_OX	OK	1.81631	1.29568	-0.4873	-1.21434	0.03305	0.0486805	yes
gene:Bra024757	gene:Bra024757	-	A09:22972367-22975173	DB-control	PP5_OX	OK	7.29391	8.3104	0.188227	1.22808	0.03305	0.0486805	yes
gene:Bra002907	gene:Bra002907	-	A10:6843471-6843780	DB-control	PP5_OX	OK	0.561694	5.03854	3.16515	2.44001	0.033	0.048615	yes
gene:Bra000082	gene:Bra000082	-	A03:9192455-9193411	DB-control	PP5_OX	NOTEST	0	0.0690772	inf	0	1	1	no
gene:Bra000083	gene:Bra000083	-	A03:9194094-9195153	DB-control	PP5_OX	NOTEST	0	0	0	0	1	1	no
gene:Bra000084	gene:Bra000084	-	A03:9196189-9198779	DB-control	PP5_OX	OK	24.5071	25.0719	0.0328746	0.320061	0.57485	0.627053	no
gene:Bra000085	gene:Bra000085	-	A03:9199239-9201076	DB-control	PP5_OX	OK	21.5075	23.3769	0.120244	1.02246	0.0764	0.104791	no
gene:Bra000086	gene:Bra000086	-	A03:9201423-9202190	DB-control	PP5_OX	NOTEST	0.309243	0.423424	0.453362	0	1	1	no
gene:Bra000087	gene:Bra000087	-	A03:9203224-9205192	DB-control	PP5_OX	NOTEST	0.174548	0.0924934	-0.916199	0	1	1	no
gene:Bra000088	gene:Bra000088	-	A03:9208032-9209235	DB-control	PP5_OX	OK	12.5463	12.5742	0.00320424	0.0156694	0.98375	0.985326	no
gene:Bra025311	gene:Bra025311	-	A06:22250799-22252366	DB-control	PP5_OX	OK	2.52307	1.66224	-0.60205	-1.23136	0.033	0.048615	yes
gene:Bra029633	gene:Bra029633	-	A05:22887066-22889253	DB-control	PP5_OX	OK	49.3596	44.9808	-0.13402	-1.26102	0.033	0.048615	yes
gene:Bra000091	gene:Bra000091	-	A03:9218396-9219801	DB-control	PP5_OX	OK	12.4168	10.9894	-0.176179	-1.07432	0.062	0.0865311	no
gene:Bra000103	gene:Bra000103	-	A03:9253150-9257019	DB-control	PP5_OX	OK	0.738968	1.13081	0.613773	1.23985	0.03295	0.0485495	yes
gene:Bra008879	gene:Bra008879	-	A10:14253954-14256112	DB-control	PP5_OX	OK	18.9891	20.5198	0.111841	1.2583	0.0329	0.0484786	yes
gene:Bra029288	gene:Bra029288	-	A02:26097595-26098891	DB-control	PP5_OX	OK	2.71954	1.95338	-0.477386	-1.26565	0.0329	0.0484786	yes
gene:Bra000095	gene:Bra000095	-	A03:9230365-9230689	DB-control	PP5_OX	NOTEST	0	0	0	0	1	1	no
gene:Bra000096	gene:Bra000096	-	A03:9231945-9233804	DB-control	PP5_OX	NOTEST	0.080565	0.121527	0.593049	0	1	1	no
gene:Bra000097	gene:Bra000097	-	A03:9234394-9235066	DB-control	PP5_OX	NOTEST	0	0	0	0	1	1	no
gene:Bra000098	gene:Bra000098	-	A03:9236559-9237656	DB-control	PP5_OX	OK	9.10197	9.0068	-0.0151645	-0.0811278	0.89905	0.915826	no
gene:Bra000099	gene:Bra000099	-	A03:9238700-9239856	DB-control	PP5_OX	NOTEST	0	0	0	0	1	1	no
gene:Bra000100	gene:Bra000100	-	A03:9241452-9245453	DB-control	PP5_OX	OK	8.48788	8.94476	0.075639	0.568836	0.32725	0.382844	no
gene:Bra000101	gene:Bra000101	-	A03:9246426-9247095	DB-control	PP5_OX	OK	5.12092	0.720729	-2.82887	-2.36576	0.2491	0.301492	no
gene:Bra000102	gene:Bra000102	-	A03:9249350-9251397	DB-control	PP5_OX	OK	49.4798	47.6325	-0.0548914	-0.63615	0.26365	0.316781	no
gene:Bra031525	gene:Bra031525	-	A01:16734776-16735064	DB-control	PP5_OX	OK	11.0053	6.88505	-0.676656	-1.29054	0.0329	0.0484786	yes
gene:Bra000104	gene:Bra000104	-	A03:9257428-9257679	DB-control	PP5_OX	NOTEST	0	0	0	0	1	1	no
gene:Bra000105	gene:Bra000105	-	A03:9258402-9260902	DB-control	PP5_OX	NOTEST	0.383039	0.168878	-1.18151	0	1	1	no
gene:Bra000106	gene:Bra000106	-	A03:9263059-9265324	DB-control	PP5_OX	NOTEST	0	0	0	0	1	1	no
gene:Bra000107	gene:Bra000107	-	A03:9269312-9270920	DB-control	PP5_OX	NOTEST	0	0	0	0	1	1	no
gene:Bra000108	gene:Bra000108	-	A03:9272399-9275663	DB-control	PP5_OX	OK	4.64601	4.42181	-0.0713565	-0.44367	0.44345	0.500478	no
gene:Bra000109	gene:Bra000109	-	A03:9285619-9288225	DB-control	PP5_OX	OK	1.62541	1.96378	0.272832	0.828531	0.15045	0.192783	no
gene:Bra000110	gene:Bra000110	-	A03:9293053-9295412	DB-control	PP5_OX	NOTEST	0.0788206	0	#NAME?	0	1	1	no
gene:Bra033741	gene:Bra033741	-	A06:25316491-25317793	DB-control	PP5_OX	OK	6.79769	5.73841	-0.244394	-1.25298	0.0329	0.0484786	yes
gene:Bra000112	gene:Bra000112	-	A03:9309045-9309750	DB-control	PP5_OX	OK	46.8012	43.4531	-0.107087	-1.02366	0.07945	0.108526	no
gene:Bra000113	gene:Bra000113	-	A03:9310855-9313219	DB-control	PP5_OX	NOTEST	0.0190837	0	#NAME?	0	1	1	no
gene:Bra001999	gene:Bra001999	-	A10:12361976-12363452	DB-control	PP5_OX	OK	49.0208	52.4592	0.0978008	1.29786	0.03285	0.0484158	yes
gene:Bra015003	gene:Bra015003	-	A07:4410377-4416095	DB-control	PP5_OX	OK	6.38617	6.997	0.131787	1.22877	0.03285	0.0484158	yes
gene:Bra000116	gene:Bra000116	-	A03:9334181-9335694	DB-control	PP5_OX	NOTEST	0	0	0	0	1	1	no
gene:Bra033019	gene:Bra033019	-	A02:21869557-21869956	DB-control	PP5_OX	OK	6.44775	4.32358	-0.576571	-1.24136	0.03285	0.0484158	yes
gene:Bra037135	gene:Bra037135	-	A09:4308627-4309266	DB-control	PP5_OX	OK	1.52181	0.380078	-2.00142	-1.83536	0.03285	0.0484158	yes
gene:Bra000119	gene:Bra000119	-	A03:9356888-9359183	DB-control	PP5_OX	NOTEST	0.366742	0.193562	-0.92197	0	1	1	no
gene:Bra007904	gene:Bra007904	-	A02:11738831-11740889	DB-control	PP5_OX	OK	6.03667	4.98393	-0.276469	-1.24369	0.0328	0.0483529	yes
gene:Bra000121	gene:Bra000121	-	A03:9369298-9373618	DB-control	PP5_OX	NOTEST	0.491154	0.538864	0.133748	0	1	1	no
gene:Bra008597	gene:Bra008597	-	A10:12983978-12985271	DB-control	PP5_OX	OK	11.6533	10.3184	-0.175512	-1.26598	0.0328	0.0483529	yes
gene:Bra000123	gene:Bra000123	-	A03:9396936-9397359	DB-control	PP5_OX	NOTEST	0	0	0	0	1	1	no
gene:Bra024029	gene:Bra024029	-	A03:28111273-28125859	DB-control	PP5_OX	OK	7.3201	6.61371	-0.146403	-1.23168	0.0328	0.0483529	yes
gene:Bra027379	gene:Bra027379	-	A05:20609175-20611339	DB-control	PP5_OX	OK	1.97295	1.39404	-0.501086	-1.24915	0.0328	0.0483529	yes
gene:Bra014705	gene:Bra014705	-	A04:2402121-2405491	DB-control	PP5_OX	OK	14.8459	16.8714	0.184513	1.23566	0.03275	0.0482901	yes
gene:Bra017009	gene:Bra017009	-	A04:17163178-17163490	DB-control	PP5_OX	OK	7.03232	3.90113	-0.85011	-1.3843	0.03275	0.0482901	yes
gene:Bra000128	gene:Bra000128	-	A03:9447685-9450304	DB-control	PP5_OX	OK	0.710871	0.918102	0.369065	1.02545	0.0742	0.102013	no
gene:Bra020305	gene:Bra020305	-	A02:6128135-6128462	DB-control	PP5_OX	OK	228.242	277.247	0.280603	1.24565	0.03275	0.0482901	yes
gene:Bra000130	gene:Bra000130	-	A03:9458014-9460471	DB-control	PP5_OX	OK	23.4885	25.5353	0.120543	1.02778	0.0776	0.106253	no
gene:Bra026482	gene:Bra026482	-	A01:9065061-9065980	DB-control	PP5_OX	OK	26.7275	21.0702	-0.343124	-1.23145	0.03275	0.0482901	yes
gene:Bra035252	gene:Bra035252	-	A08:9602778-9607207	DB-control	PP5_OX	OK	12.1092	11.2427	-0.107116	-1.22355	0.03275	0.0482901	yes
gene:Bra000133	gene:Bra000133	-	A03:9474250-9475141	DB-control	PP5_OX	NOTEST	0.0876817	0.0282786	-1.63257	0	1	1	no
gene:Bra003210	gene:Bra003210	-	A07:11898396-11899247	DB-control	PP5_OX	OK	14.6004	17.6103	0.270412	1.23049	0.0327	0.0482299	yes
gene:Bra009405	gene:Bra009405	-	A10:16500014-16503493	DB-control	PP5_OX	OK	16.7869	15.6082	-0.105033	-1.23599	0.0327	0.0482299	yes
gene:Bra000136	gene:Bra000136	-	A03:9480669-9486331	DB-control	PP5_OX	OK	7.765	7.69954	-0.0122136	-0.135847	0.81835	0.847061	no
gene:Bra000137	gene:Bra000137	-	A03:9490303-9490951	DB-control	PP5_OX	NOTEST	0	0.06578	inf	0	1	1	no
gene:Bra000138	gene:Bra000138	-	A03:9495219-9497730	DB-control	PP5_OX	OK	1.09043	1.27398	0.224443	0.751791	0.19195	0.239191	no
gene:Bra000139	gene:Bra000139	-	A03:9498486-9500854	DB-control	PP5_OX	OK	11.5694	10.5248	-0.136527	-0.836462	0.1469	0.188621	no
gene:Bra009610	gene:Bra009610	-	A10:17428903-17429737	DB-control	PP5_OX	OK	2.40248	1.55617	-0.626527	-1.28748	0.0327	0.0482299	yes
gene:Bra029095	gene:Bra029095	-	A03:6331469-6334230	DB-control	PP5_OX	OK	84.4676	76.8122	-0.137063	-1.21385	0.0327	0.0482299	yes
gene:Bra000142	gene:Bra000142	-	A03:9520175-9521678	DB-control	PP5_OX	OK	16.9622	14.1646	-0.260033	-1.15971	0.0421	0.0608132	no
gene:Bra003895	gene:Bra003895	-	A07:15608387-15609358	DB-control	PP5_OX	OK	0.83047	0.31932	-1.37893	-1.23674	0.03265	0.048167	yes
gene:Bra008840	gene:Bra008840	-	A10:14059353-14062402	DB-control	PP5_OX	OK	21.734	20.1632	-0.108231	-1.22924	0.03265	0.048167	yes
gene:Bra028830	gene:Bra028830	-	A02:1845993-1849855	DB-control	PP5_OX	OK	3.34978	2.31063	-0.535779	-1.23987	0.03265	0.048167	yes
gene:Bra000146	gene:Bra000146	-	A03:9548470-9549640	DB-control	PP5_OX	NOTEST	0	0	0	0	1	1	no
gene:Bra012303	gene:Bra012303	-	A07:8680918-8682413	DB-control	PP5_OX	OK	19.3004	21.797	0.175499	1.25166	0.0326	0.0481013	yes
gene:Bra000148	gene:Bra000148	-	A03:9554993-9555656	DB-control	PP5_OX	NOTEST	0	0	0	0	1	1	no
gene:Bra025264	gene:Bra025264	-	A06:22495471-22498883	DB-control	PP5_OX	OK	0.764976	1.16011	0.600778	1.24793	0.0326	0.0481013	yes
gene:Bra029904	gene:Bra029904	-	A01:14681616-14682177	DB-control	PP5_OX	OK	0.379346	1.30754	1.78527	1.47095	0.0326	0.0481013	yes
gene:Bra030154	gene:Bra030154	-	A07:6184991-6185402	DB-control	PP5_OX	OK	8.57245	11.3188	0.400938	1.24331	0.0326	0.0481013	yes
gene:Bra004568	gene:Bra004568	-	A05:829599-830960	DB-control	PP5_OX	OK	3.52659	5.21326	0.563912	1.30773	0.03255	0.0480383	yes
gene:Bra004663	gene:Bra004663	-	A05:1288013-1292056	DB-control	PP5_OX	OK	9.66441	10.4122	0.107525	1.23899	0.03255	0.0480383	yes
gene:Bra037391	gene:Bra037391	-	A09:748915-751636	DB-control	PP5_OX	OK	1.87429	1.53166	-0.291245	-1.26233	0.03255	0.0480383	yes
gene:Bra004268	gene:Bra004268	-	A07:17721007-17721214	DB-control	PP5_OX	OK	8.70281	2.7227	-1.67644	-1.28158	0.0325	0.0479726	yes
gene:Bra000156	gene:Bra000156	-	A03:9606078-9608687	DB-control	PP5_OX	OK	15.6126	15.7229	0.0101613	0.104889	0.85295	0.876894	no
gene:Bra000157	gene:Bra000157	-	A03:9615977-9617616	DB-control	PP5_OX	OK	37.4794	40.6199	0.116088	1.20862	0.03535	0.0518182	no
gene:Bra037430	gene:Bra037430	-	A06:21504638-21505812	DB-control	PP5_OX	OK	40.4618	44.715	0.1442	1.25594	0.0325	0.0479726	yes
gene:Bra006448	gene:Bra006448	-	A03:3523995-3525343	DB-control	PP5_OX	OK	2.14907	3.86584	0.847068	1.25472	0.03245	0.0479042	yes
gene:Bra000160	gene:Bra000160	-	A03:9633632-9635566	DB-control	PP5_OX	OK	3.59628	2.9057	-0.307621	-1.173	0.0495	0.070372	no
gene:Bra010173	gene:Bra010173	-	A06:20494575-20495504	DB-control	PP5_OX	OK	1.20433	2.49604	1.0514	1.45541	0.03245	0.0479042	yes
gene:Bra010779	gene:Bra010779	-	A08:16400454-16402344	DB-control	PP5_OX	OK	9.02171	10.517	0.221245	1.23138	0.03235	0.047762	yes
gene:Bra016032	gene:Bra016032	-	A07:19751343-19752384	DB-control	PP5_OX	OK	12.7823	11.2109	-0.189247	-1.24004	0.03235	0.047762	yes
gene:Bra015888	gene:Bra015888	-	A07:20356304-20357900	DB-control	PP5_OX	OK	3.63187	4.56244	0.329093	1.26979	0.0323	0.0476935	yes
gene:Bra037674	gene:Bra037674	-	A04:18229760-18231067	DB-control	PP5_OX	OK	4.35973	3.09408	-0.494728	-1.31374	0.0323	0.0476935	yes
gene:Bra000166	gene:Bra000166	-	A03:9659963-9672743	DB-control	PP5_OX	OK	3.20533	3.4504	0.106292	0.460804	0.4339	0.490987	no
gene:Bra000167	gene:Bra000167	-	A03:9676056-9679395	DB-control	PP5_OX	OK	2.06677	1.42129	-0.540176	-1.05969	0.08015	0.109403	no
gene:Bra000168	gene:Bra000168	-	A03:9681786-9684388	DB-control	PP5_OX	NOTEST	0	0.00948993	inf	0	1	1	no
gene:Bra004206	gene:Bra004206	-	A07:17406342-17421935	DB-control	PP5_OX	OK	9.81619	10.8286	0.141616	1.22039	0.03225	0.047625	yes
gene:Bra000573	gene:Bra000573	-	A03:11841428-11843185	DB-control	PP5_OX	OK	15.9561	14.4826	-0.139784	-1.25914	0.03215	0.04748	yes
gene:Bra001692	gene:Bra001692	-	A03:17880584-17884068	DB-control	PP5_OX	OK	12.0197	10.8443	-0.148457	-1.2433	0.0321	0.0474088	yes
gene:Bra000172	gene:Bra000172	-	A03:9704856-9706428	DB-control	PP5_OX	NOTEST	0.075722	0	#NAME?	0	1	1	no
gene:Bra000173	gene:Bra000173	-	A03:9706701-9707071	DB-control	PP5_OX	NOTEST	0	0	0	0	1	1	no
gene:Bra000174	gene:Bra000174	-	A03:9711577-9713080	DB-control	PP5_OX	NOTEST	0.255082	0.248039	-0.0403947	0	1	1	no
gene:Bra000175	gene:Bra000175	-	A03:9713389-9716773	DB-control	PP5_OX	NOTEST	0	0	0	0	1	1	no
gene:Bra000176	gene:Bra000176	-	A03:9723374-9725270	DB-control	PP5_OX	NOTEST	0.0680677	0.0374931	-0.860345	0	1	1	no
gene:Bra000177	gene:Bra000177	-	A03:9725503-9726637	DB-control	PP5_OX	OK	0.330036	0.727385	1.1401	1.06047	0.14905	0.191176	no
gene:Bra000178	gene:Bra000178	-	A03:9726890-9729607	DB-control	PP5_OX	NOTEST	0	0	0	0	1	1	no
gene:Bra021606	gene:Bra021606	-	A04:13372208-13373930	DB-control	PP5_OX	OK	12.0455	13.6552	0.180946	1.23656	0.0321	0.0474088	yes
gene:Bra000180	gene:Bra000180	-	A03:9752690-9754265	DB-control	PP5_OX	NOTEST	0	0.017926	inf	0	1	1	no
gene:Bra031256	gene:Bra031256	-	A05:16622468-16626181	DB-control	PP5_OX	OK	11.9047	13.0944	0.137421	1.2422	0.0321	0.0474088	yes
gene:Bra000182	gene:Bra000182	-	A03:9763826-9766165	DB-control	PP5_OX	OK	24.9188	25.3957	0.02735	0.26253	0.6518	0.698684	no
gene:Bra000183	gene:Bra000183	-	A03:9767149-9768771	DB-control	PP5_OX	NOTEST	0	0	0	0	1	1	no
gene:Bra000184	gene:Bra000184	-	A03:9772565-9773204	DB-control	PP5_OX	OK	0.261061	9.59229	5.19941	5.02251	0.044	0.0632584	no
gene:Bra000185	gene:Bra000185	-	A03:9777760-9778641	DB-control	PP5_OX	OK	0.602012	0.398661	-0.59463	-0.503941	0.3408	0.396804	no
gene:Bra000186	gene:Bra000186	-	A03:9779252-9779958	DB-control	PP5_OX	OK	3.45964	3.72989	0.108512	0.273638	0.64265	0.690144	no
gene:Bra036157	gene:Bra036157	-	A09:2413583-2414140	DB-control	PP5_OX	OK	39.3478	31.1444	-0.337311	-1.25407	0.0321	0.0474088	yes
gene:Bra000188	gene:Bra000188	-	A03:9790597-9791563	DB-control	PP5_OX	NOTEST	0.147298	0.359596	1.28764	0	1	1	no
gene:Bra000189	gene:Bra000189	-	A03:9795417-9795675	DB-control	PP5_OX	OK	1.38284	3.13656	1.18154	1.13214	0.13865	0.179035	no
gene:Bra012718	gene:Bra012718	-	A03:22570724-22571803	DB-control	PP5_OX	OK	11.8371	14.491	0.291839	1.25173	0.03205	0.0473456	yes
gene:Bra000191	gene:Bra000191	-	A03:9804924-9805230	DB-control	PP5_OX	NOTEST	0.12038	0.461855	1.93984	0	1	1	no
gene:Bra000192	gene:Bra000192	-	A03:9806957-9808407	DB-control	PP5_OX	NOTEST	0	0	0	0	1	1	no
gene:Bra014415	gene:Bra014415	-	A04:421602-422565	DB-control	PP5_OX	OK	2.13172	1.49783	-0.509141	-1.24462	0.03205	0.0473456	yes
gene:Bra000194	gene:Bra000194	-	A03:9810949-9812426	DB-control	PP5_OX	OK	0.837842	0.373667	-1.16493	-1.30381	0.07725	0.105807	no
gene:Bra000195	gene:Bra000195	-	A03:9815558-9817501	DB-control	PP5_OX	NOTEST	0.252475	0.389885	0.626909	0	1	1	no
gene:Bra000196	gene:Bra000196	-	A03:9821594-9823698	DB-control	PP5_OX	OK	7.69669	8.17924	0.087729	0.546343	0.34615	0.402498	no
gene:Bra033557	gene:Bra033557	-	A06:26240958-26246889	DB-control	PP5_OX	OK	9.56215	10.3929	0.120196	1.22831	0.03205	0.0473456	yes
gene:Bra016929	gene:Bra016929	-	A04:17549523-17551782	DB-control	PP5_OX	OK	13.3688	12.1315	-0.140112	-1.24051	0.032	0.0472798	yes
gene:Bra017938	gene:Bra017938	-	A06:8951223-8951403	DB-control	PP5_OX	OK	0	2.28819	inf	#NAME?	0.032	0.0472798	yes
gene:Bra000200	gene:Bra000200	-	A03:9836592-9839145	DB-control	PP5_OX	OK	0.81985	0.958647	0.22564	0.654863	0.25755	0.310147	no
gene:Bra011386	gene:Bra011386	-	A01:2405195-2407006	DB-control	PP5_OX	OK	11.352	9.67996	-0.229875	-1.25207	0.03195	0.0472112	yes
gene:Bra000202	gene:Bra000202	-	A03:9847256-9849212	DB-control	PP5_OX	OK	0.184708	0.637244	1.7866	1.35333	0.0445	0.0639003	no
gene:Bra026021	gene:Bra026021	-	A06:6471901-6473545	DB-control	PP5_OX	OK	15.615	17.2273	0.141767	1.24682	0.03195	0.0472112	yes
gene:Bra000204	gene:Bra000204	-	A03:9863741-9864307	DB-control	PP5_OX	OK	31.2948	22.6274	-0.467849	-0.788865	0.18515	0.231718	no
gene:Bra000205	gene:Bra000205	-	A03:9872545-9873760	DB-control	PP5_OX	NOTEST	0	0	0	0	1	1	no
gene:Bra000206	gene:Bra000206	-	A03:9875144-9876358	DB-control	PP5_OX	OK	7.22046	6.60482	-0.128572	-0.61427	0.2873	0.341833	no
gene:Bra040899	gene:Bra040899	-	Scaffold000302:12837-15102	DB-control	PP5_OX	OK	379.68	416.41	0.133221	1.21942	0.03195	0.0472112	yes
gene:Bra000208	gene:Bra000208	-	A03:9880235-9881825	DB-control	PP5_OX	NOTEST	0	0.0253453	inf	0	1	1	no
gene:Bra000209	gene:Bra000209	-	A03:9882281-9885255	DB-control	PP5_OX	OK	6.94548	6.27208	-0.147132	-1.00526	0.0829	0.112781	no
gene:Bra000210	gene:Bra000210	-	A03:9891737-9892112	DB-control	PP5_OX	NOTEST	0	0	0	0	1	1	no
gene:Bra000211	gene:Bra000211	-	A03:9892510-9894826	DB-control	PP5_OX	OK	40.6248	37.7066	-0.107545	-0.910155	0.1154	0.151965	no
gene:Bra000212	gene:Bra000212	-	A03:9899430-9902408	DB-control	PP5_OX	OK	1.8593	2.29693	0.304949	0.847009	0.14425	0.185536	no
gene:Bra003925	gene:Bra003925	-	A07:15789281-15791699	DB-control	PP5_OX	OK	2.42902	1.98155	-0.293745	-1.25545	0.03185	0.0470714	yes
gene:Bra014080	gene:Bra014080	-	A08:3734089-3737342	DB-control	PP5_OX	OK	2.70559	1.9415	-0.478769	-1.25933	0.03185	0.0470714	yes
gene:Bra022983	gene:Bra022983	-	A03:8080973-8083380	DB-control	PP5_OX	OK	2.15228	1.71965	-0.323748	-1.27195	0.03185	0.0470714	yes
gene:Bra029455	gene:Bra029455	-	A09:17929631-17930468	DB-control	PP5_OX	OK	2.29296	1.55403	-0.561196	-1.23385	0.0318	0.0470054	yes
gene:Bra034545	gene:Bra034545	-	A08:12901573-12902008	DB-control	PP5_OX	OK	0.649174	2.65654	2.03287	1.94107	0.0318	0.0470054	yes
gene:Bra037781	gene:Bra037781	-	A09:3534873-3537342	DB-control	PP5_OX	OK	7.50106	8.72484	0.218034	1.23488	0.0318	0.0470054	yes
gene:Bra000219	gene:Bra000219	-	A03:9949618-9952641	DB-control	PP5_OX	NOTEST	0	0.0071075	inf	0	1	1	no
gene:Bra000220	gene:Bra000220	-	A03:9954629-9965804	DB-control	PP5_OX	OK	5.11413	5.34903	0.0647908	0.646689	0.2628	0.315933	no
gene:Bra000221	gene:Bra000221	-	A03:9967868-9968072	DB-control	PP5_OX	NOTEST	0	0	0	0	1	1	no
gene:Bra038830	gene:Bra038830	-	A07:1216874-1219074	DB-control	PP5_OX	OK	5.88655	6.7321	0.193634	1.24745	0.0318	0.0470054	yes
gene:Bra000223	gene:Bra000223	-	A03:9987607-9989831	DB-control	PP5_OX	OK	2.35684	2.52362	0.0986385	0.310204	0.59765	0.648207	no
gene:Bra000224	gene:Bra000224	-	A03:10000126-10001362	DB-control	PP5_OX	OK	0.398988	0.82654	1.05074	0.896218	0.09375	0.125995	no
gene:Bra000518	gene:Bra000518	-	A03:11540383-11541608	DB-control	PP5_OX	OK	3.87552	2.55241	-0.602531	-1.26343	0.0317	0.0468682	yes
gene:Bra020581	gene:Bra020581	-	A02:24450768-24451328	DB-control	PP5_OX	OK	18.7086	15.3222	-0.288077	-1.24612	0.0317	0.0468682	yes
gene:Bra032040	gene:Bra032040	-	A04:11307138-11308664	DB-control	PP5_OX	OK	22.0783	19.7362	-0.16179	-1.25525	0.0317	0.0468682	yes
gene:Bra007899	gene:Bra007899	-	A02:11710997-11713308	DB-control	PP5_OX	OK	6.33751	7.28899	0.201802	1.24349	0.03165	0.0468021	yes
gene:Bra000229	gene:Bra000229	-	A03:10045583-10047577	DB-control	PP5_OX	NOTEST	0.293208	0.448908	0.614497	0	1	1	no
gene:Bra000230	gene:Bra000230	-	A03:10048022-10049600	DB-control	PP5_OX	OK	42.3965	45.1682	0.0913633	1.00667	0.08515	0.115453	no
gene:Bra030521	gene:Bra030521	-	A08:21476598-21477460	DB-control	PP5_OX	OK	8.11221	5.35039	-0.60045	-1.28268	0.03165	0.0468021	yes
gene:Bra000232	gene:Bra000232	-	A03:10054461-10056367	DB-control	PP5_OX	OK	28.9271	28.8097	-0.00586691	-0.0570777	0.9242	0.936794	no
gene:Bra000233	gene:Bra000233	-	A03:10062357-10063230	DB-control	PP5_OX	NOTEST	0.306317	0.0290078	-3.40051	0	1	1	no
gene:Bra000234	gene:Bra000234	-	A03:10064946-10067601	DB-control	PP5_OX	OK	95.3297	89.0883	-0.0976901	-0.890542	0.1187	0.155943	no
gene:Bra000235	gene:Bra000235	-	A03:10071247-10072439	DB-control	PP5_OX	NOTEST	0.325223	0.15812	-1.04041	0	1	1	no
gene:Bra032629	gene:Bra032629	-	A09:36919451-36920468	DB-control	PP5_OX	OK	12.8459	11.1896	-0.19915	-1.25309	0.03165	0.0468021	yes
gene:Bra002977	gene:Bra002977	-	A10:6326784-6327021	DB-control	PP5_OX	OK	42.11	31.9481	-0.398434	-1.27213	0.0316	0.0467361	yes
gene:Bra007253	gene:Bra007253	-	A09:28211161-28212094	DB-control	PP5_OX	OK	4.34603	3.34921	-0.375877	-1.25205	0.03155	0.0466648	yes
gene:Bra013306	gene:Bra013306	-	A01:4883202-4884065	DB-control	PP5_OX	OK	12.5161	8.69508	-0.525513	-1.24959	0.03155	0.0466648	yes
gene:Bra022678	gene:Bra022678	-	A02:8076269-8076464	DB-control	PP5_OX	OK	178.81	212.318	0.247797	1.28551	0.0315	0.0465961	yes
gene:Bra000241	gene:Bra000241	-	A03:10103851-10104871	DB-control	PP5_OX	NOTEST	0.0427926	0	#NAME?	0	1	1	no
gene:Bra036872	gene:Bra036872	-	A01:12515542-12517885	DB-control	PP5_OX	OK	0.959454	0.67897	-0.498865	-1.26807	0.0315	0.0465961	yes
gene:Bra000243	gene:Bra000243	-	A03:10112509-10112896	DB-control	PP5_OX	OK	2.93135	4.63202	0.660074	1.14622	0.0555	0.0781782	no
gene:Bra000244	gene:Bra000244	-	A03:10115749-10115935	DB-control	PP5_OX	NOTEST	0	0.498513	inf	0	1	1	no
gene:Bra018022	gene:Bra018022	-	A06:9559202-9559911	DB-control	PP5_OX	OK	14.5886	11.4377	-0.35105	-1.22974	0.03145	0.0465274	yes
gene:Bra000246	gene:Bra000246	-	A03:10126305-10127621	DB-control	PP5_OX	OK	15.4452	17.6516	0.192639	0.836876	0.1532	0.195915	no
gene:Bra010310	gene:Bra010310	-	A08:13781722-13785069	DB-control	PP5_OX	OK	4.19392	4.76755	0.184948	1.32236	0.0314	0.046456	yes
gene:Bra000248	gene:Bra000248	-	A03:10131762-10133993	DB-control	PP5_OX	NOTEST	0	0	0	0	1	1	no
gene:Bra033668	gene:Bra033668	-	A06:25725414-25725807	DB-control	PP5_OX	OK	15.7624	12.3112	-0.356517	-1.23566	0.0314	0.046456	yes
gene:Bra000250	gene:Bra000250	-	A03:10139160-10140165	DB-control	PP5_OX	NOTEST	0.526412	0.560524	0.0905843	0	1	1	no
gene:Bra000251	gene:Bra000251	-	A03:10145070-10146681	DB-control	PP5_OX	OK	2.50545	2.98922	0.254697	0.714033	0.2196	0.269956	no
gene:Bra000252	gene:Bra000252	-	A03:10149113-10149932	DB-control	PP5_OX	NOTEST	0.0294318	0.0241934	-0.282762	0	1	1	no
gene:Bra000253	gene:Bra000253	-	A03:10150500-10151831	DB-control	PP5_OX	OK	17.0567	17.6143	0.0464054	0.308547	0.592	0.642982	no
gene:Bra000254	gene:Bra000254	-	A03:10171694-10175481	DB-control	PP5_OX	NOTEST	0	0	0	0	1	1	no
gene:Bra000255	gene:Bra000255	-	A03:10194201-10194402	DB-control	PP5_OX	OK	5.71158	5.47222	-0.0617645	-0.0629104	0.9276	0.939529	no
gene:Bra035868	gene:Bra035868	-	A09:3224098-3225025	DB-control	PP5_OX	OK	4.30441	6.72208	0.643092	1.24656	0.0314	0.046456	yes
gene:Bra000257	gene:Bra000257	-	A03:10204675-10206488	DB-control	PP5_OX	NOTEST	0	0	0	0	1	1	no
gene:Bra000258	gene:Bra000258	-	A03:10212457-10214318	DB-control	PP5_OX	NOTEST	0	0	0	0	1	1	no
gene:Bra000259	gene:Bra000259	-	A03:10215030-10216365	DB-control	PP5_OX	NOTEST	0	0	0	0	1	1	no
gene:Bra038757	gene:Bra038757	-	A03:24245880-24249414	DB-control	PP5_OX	OK	24.1755	22.0923	-0.129999	-1.29379	0.03125	0.0462419	yes
gene:Bra007523	gene:Bra007523	-	A09:29605873-29608601	DB-control	PP5_OX	OK	1.26857	1.6384	0.369079	1.26154	0.0312	0.0461705	yes
gene:Bra000262	gene:Bra000262	-	A03:10230887-10234566	DB-control	PP5_OX	OK	13.4984	14.7293	0.125899	0.838691	0.1501	0.192382	no
gene:Bra027600	gene:Bra027600	-	A09:12971481-12972701	DB-control	PP5_OX	OK	8.66058	10.0301	0.211801	1.25538	0.0312	0.0461705	yes
gene:Bra000264	gene:Bra000264	-	A03:10237817-10238039	DB-control	PP5_OX	NOTEST	0	0	0	0	1	1	no
gene:Bra038545	gene:Bra038545	-	A09:5202180-5203392	DB-control	PP5_OX	OK	0.359966	0.705563	0.970914	1.24251	0.0312	0.0461705	yes
gene:Bra000266	gene:Bra000266	-	A03:10242831-10243365	DB-control	PP5_OX	NOTEST	0	0	0	0	1	1	no
gene:Bra039312	gene:Bra039312	-	A04:18651136-18653554	DB-control	PP5_OX	OK	27.2533	29.2301	0.101022	1.24238	0.0312	0.0461705	yes
gene:Bra039300	gene:Bra039300	-	A04:18690456-18691236	DB-control	PP5_OX	OK	2.95516	4.09418	0.470341	1.2554	0.03115	0.0461069	yes
gene:Bra000269	gene:Bra000269	-	A03:10264816-10265350	DB-control	PP5_OX	OK	4.32287	4.06501	-0.0887307	-0.216831	0.71025	0.751885	no
gene:Bra000270	gene:Bra000270	-	A03:10270516-10272516	DB-control	PP5_OX	NOTEST	0	0	0	0	1	1	no
gene:Bra000271	gene:Bra000271	-	A03:10276142-10277396	DB-control	PP5_OX	OK	1.2847	1.36772	0.0903452	0.141399	0.81925	0.847925	no
gene:Bra007226	gene:Bra007226	-	A09:28079337-28081517	DB-control	PP5_OX	OK	0.342691	0.744515	1.11939	1.50622	0.0311	0.0460355	yes
gene:Bra000273	gene:Bra000273	-	A03:10280309-10280755	DB-control	PP5_OX	NOTEST	0	0	0	0	1	1	no
gene:Bra027394	gene:Bra027394	-	A05:20685862-20688956	DB-control	PP5_OX	OK	13.4531	14.8464	0.142174	1.24788	0.0311	0.0460355	yes
gene:Bra000275	gene:Bra000275	-	A03:10285988-10286174	DB-control	PP5_OX	NOTEST	0	0	0	0	1	1	no
gene:Bra000276	gene:Bra000276	-	A03:10289820-10290171	DB-control	PP5_OX	OK	12.2198	15.9982	0.388692	1.21979	0.0372	0.0543027	no
gene:Bra035183	gene:Bra035183	-	A07:22479802-22480882	DB-control	PP5_OX	OK	251.069	275.411	0.133503	1.23206	0.03105	0.0459667	yes
gene:Bra000278	gene:Bra000278	-	A03:10303538-10307271	DB-control	PP5_OX	NOTEST	0	0.0204107	inf	0	1	1	no
gene:Bra000279	gene:Bra000279	-	A03:10315919-10319466	DB-control	PP5_OX	OK	3.60354	3.89331	0.111581	0.650417	0.25635	0.308928	no
gene:Bra000280	gene:Bra000280	-	A03:10320503-10322172	DB-control	PP5_OX	OK	27.9133	27.8131	-0.00518449	-0.0495862	0.92885	0.940527	no
gene:Bra027521	gene:Bra027521	-	A09:13613542-13614990	DB-control	PP5_OX	OK	133.625	121.335	-0.139195	-1.23304	0.031	0.0458952	yes
gene:Bra001407	gene:Bra001407	-	A03:16231409-16232672	DB-control	PP5_OX	OK	16.725	20.6209	0.302102	1.24885	0.03095	0.0458238	yes
gene:Bra006147	gene:Bra006147	-	A03:2222645-2225429	DB-control	PP5_OX	OK	4.93546	5.69636	0.206856	1.24939	0.03095	0.0458238	yes
gene:Bra000284	gene:Bra000284	-	A03:10338525-10341064	DB-control	PP5_OX	NOTEST	0.01795	0.0688747	1.93999	0	1	1	no
gene:Bra010842	gene:Bra010842	-	A08:16750048-16752028	DB-control	PP5_OX	OK	2.64041	3.29494	0.319492	1.27612	0.03095	0.0458238	yes
gene:Bra014103	gene:Bra014103	-	A08:3431820-3432269	DB-control	PP5_OX	OK	9.37654	14.2924	0.608117	1.22578	0.03095	0.0458238	yes
gene:Bra000287	gene:Bra000287	-	A03:10349599-10349950	DB-control	PP5_OX	NOTEST	0	0	0	0	1	1	no
gene:Bra016640	gene:Bra016640	-	A08:19388174-19392920	DB-control	PP5_OX	OK	1.69636	1.30076	-0.383085	-1.26831	0.0309	0.0457601	yes
gene:Bra031683	gene:Bra031683	-	A09:35260620-35262665	DB-control	PP5_OX	OK	8.40291	9.90943	0.237912	1.25388	0.0309	0.0457601	yes
gene:Bra000290	gene:Bra000290	-	A03:10361481-10362205	DB-control	PP5_OX	OK	0.699683	0.224021	-1.64306	-1.09651	0.1665	0.210819	no
gene:Bra037634	gene:Bra037634	-	A04:18395545-18396269	DB-control	PP5_OX	OK	0.727187	1.59915	1.13691	1.35999	0.0309	0.0457601	yes
gene:Bra010929	gene:Bra010929	-	A08:17171893-17173719	DB-control	PP5_OX	OK	15.2228	16.9248	0.152899	1.26885	0.03085	0.0456938	yes
gene:Bra023903	gene:Bra023903	-	A01:20924528-20926277	DB-control	PP5_OX	OK	6.09665	7.15488	0.230911	1.24752	0.03085	0.0456938	yes
gene:Bra000294	gene:Bra000294	-	A03:10391147-10396873	DB-control	PP5_OX	OK	13.9345	14.0139	0.0081923	0.0634709	0.9101	0.925503	no
gene:Bra000295	gene:Bra000295	-	A03:10391147-10396873	DB-control	PP5_OX	OK	10.9269	11.5478	0.0797269	0.461708	0.416	0.473056	no
gene:Bra000296	gene:Bra000296	-	A03:10398796-10400847	DB-control	PP5_OX	NOTEST	0.311661	0.0855636	-1.86491	0	1	1	no
gene:Bra002806	gene:Bra002806	-	A10:7477486-7479381	DB-control	PP5_OX	OK	7.50081	6.30416	-0.250743	-1.25123	0.0308	0.0456249	yes
gene:Bra000298	gene:Bra000298	-	A03:10403967-10409086	DB-control	PP5_OX	OK	7.25881	6.68912	-0.117917	-0.640254	0.26765	0.321131	no
gene:Bra004471	gene:Bra004471	-	A05:306835-309751	DB-control	PP5_OX	OK	10.8207	9.46146	-0.193655	-1.2651	0.0308	0.0456249	yes
gene:Bra009955	gene:Bra009955	-	A06:18297918-18298569	DB-control	PP5_OX	OK	2.17602	1.35898	-0.679169	-1.26793	0.0308	0.0456249	yes
gene:Bra030127	gene:Bra030127	-	A07:6354307-6355366	DB-control	PP5_OX	OK	25.4048	20.9271	-0.279732	-1.26587	0.0308	0.0456249	yes
gene:Bra031953	gene:Bra031953	-	A02:26931893-26933713	DB-control	PP5_OX	OK	10.2046	11.8387	0.21429	1.23651	0.0308	0.0456249	yes
gene:Bra002926	gene:Bra002926	-	A10:6704746-6706189	DB-control	PP5_OX	OK	189.445	172.033	-0.139093	-1.2367	0.03075	0.0455637	yes
gene:Bra000304	gene:Bra000304	-	A03:10434214-10435881	DB-control	PP5_OX	OK	9.12483	9.84835	0.110084	0.654025	0.263	0.31613	no
gene:Bra034960	gene:Bra034960	-	Scaffold000100:200160-203990	DB-control	PP5_OX	OK	8.64868	7.60092	-0.186306	-1.25466	0.03075	0.0455637	yes
gene:Bra000306	gene:Bra000306	-	A03:10444721-10445973	DB-control	PP5_OX	NOTEST	0.129497	0.131934	0.0268902	0	1	1	no
gene:Bra040603	gene:Bra040603	-	A05:23554007-23555511	DB-control	PP5_OX	OK	10.4242	8.81987	-0.241102	-1.25494	0.03075	0.0455637	yes
gene:Bra000724	gene:Bra000724	-	A03:12677260-12679742	DB-control	PP5_OX	OK	48.5456	53.5455	0.141426	1.24382	0.0307	0.0454973	yes
gene:Bra000309	gene:Bra000309	-	A03:10469010-10469424	DB-control	PP5_OX	NOTEST	0	0	0	0	1	1	no
gene:Bra003942	gene:Bra003942	-	A07:15882914-15883416	DB-control	PP5_OX	OK	28.2204	33.1869	0.233874	1.25511	0.0307	0.0454973	yes
gene:Bra023862	gene:Bra023862	-	A01:20534876-20536581	DB-control	PP5_OX	OK	3.27348	2.44831	-0.419039	-1.24402	0.0307	0.0454973	yes
gene:Bra034579	gene:Bra034579	-	A08:12741981-12747166	DB-control	PP5_OX	OK	6.22623	6.97611	0.164063	1.2583	0.0307	0.0454973	yes
gene:Bra000313	gene:Bra000313	-	A03:10503218-10503659	DB-control	PP5_OX	NOTEST	0.118348	0	#NAME?	0	1	1	no
gene:Bra000314	gene:Bra000314	-	A03:10505648-10506747	DB-control	PP5_OX	NOTEST	0.0373962	0.364558	3.28519	0	1	1	no
gene:Bra001599	gene:Bra001599	-	A03:17296922-17298770	DB-control	PP5_OX	OK	0.290367	0.658931	1.18225	1.42486	0.03065	0.0454334	yes
gene:Bra010182	gene:Bra010182	-	A06:20621985-20627885	DB-control	PP5_OX	OK	12.0338	13.7151	0.188672	1.27101	0.0306	0.0453619	yes
gene:Bra029827	gene:Bra029827	-	A05:22127870-22129064	DB-control	PP5_OX	OK	5.81953	7.39059	0.344785	1.26412	0.0306	0.0453619	yes
gene:Bra000318	gene:Bra000318	-	A03:10529217-10531266	DB-control	PP5_OX	OK	3.11832	3.21896	0.045827	0.205687	0.72125	0.761503	no
gene:Bra000319	gene:Bra000319	-	A03:10531854-10533822	DB-control	PP5_OX	NOTEST	0	0	0	0	1	1	no
gene:Bra000320	gene:Bra000320	-	A03:10534710-10536690	DB-control	PP5_OX	NOTEST	0	0	0	0	1	1	no
gene:Bra008850	gene:Bra008850	-	A10:14135591-14136482	DB-control	PP5_OX	OK	0.377928	1.61118	2.09194	2.01979	0.03055	0.0452929	yes
gene:Bra000322	gene:Bra000322	-	A03:10543300-10543951	DB-control	PP5_OX	NOTEST	0	0	0	0	1	1	no
gene:Bra000323	gene:Bra000323	-	A03:10544642-10545242	DB-control	PP5_OX	NOTEST	0	0	0	0	1	1	no
gene:Bra000324	gene:Bra000324	-	A03:10546489-10547340	DB-control	PP5_OX	NOTEST	0	0	0	0	1	1	no
gene:Bra000325	gene:Bra000325	-	A03:10549161-10549365	DB-control	PP5_OX	OK	102.292	90.8863	-0.170564	-0.69262	0.2331	0.284831	no
gene:Bra000326	gene:Bra000326	-	A03:10550803-10552805	DB-control	PP5_OX	OK	49.1505	49.1085	-0.00123454	-0.0123461	0.9806	0.982958	no
gene:Bra000327	gene:Bra000327	-	A03:10553994-10557000	DB-control	PP5_OX	NOTEST	0	0	0	0	1	1	no
gene:Bra041020	gene:Bra041020	-	Scaffold000383:14389-15704	DB-control	PP5_OX	OK	0.0952031	1.75864	4.20731	2.39329	0.0305	0.0452213	yes
gene:Bra000329	gene:Bra000329	-	A03:10566265-10567709	DB-control	PP5_OX	NOTEST	0	0	0	0	1	1	no
gene:Bra000330	gene:Bra000330	-	A03:10584310-10585757	DB-control	PP5_OX	OK	0.0318638	1.1233	5.13969	2.36392	0.23505	0.286787	no
gene:Bra000331	gene:Bra000331	-	A03:10590867-10592356	DB-control	PP5_OX	NOTEST	0	0	0	0	1	1	no
gene:Bra000332	gene:Bra000332	-	A03:10598530-10600803	DB-control	PP5_OX	NOTEST	0	0	0	0	1	1	no
gene:Bra000333	gene:Bra000333	-	A03:10605370-10610434	DB-control	PP5_OX	NOTEST	0	0	0	0	1	1	no
gene:ENSRNA049461494	gene:ENSRNA049461494	U2	A03:5069395-5069590	DB-control	PP5_OX	OK	2.13926	90.6646	5.40535	3.10028	0.0305	0.0452213	yes
gene:Bra014226	gene:Bra014226	-	A08:2370128-2372393	DB-control	PP5_OX	OK	13.7147	12.051	-0.186571	-1.26265	0.03045	0.0451523	yes
gene:Bra020040	gene:Bra020040	-	A02:4771773-4774154	DB-control	PP5_OX	OK	47.7854	43.2947	-0.142381	-1.25371	0.03045	0.0451523	yes
gene:Bra000337	gene:Bra000337	-	A03:10618283-10618907	DB-control	PP5_OX	OK	1.06194	0.606108	-0.809051	-0.854068	0.15775	0.201068	no
gene:Bra030365	gene:Bra030365	-	A05:10619987-10621300	DB-control	PP5_OX	OK	86.9606	78.7578	-0.142939	-1.27987	0.03045	0.0451523	yes
gene:Bra031062	gene:Bra031062	-	A09:32688381-32690240	DB-control	PP5_OX	OK	9.66671	8.62234	-0.164947	-1.24913	0.03045	0.0451523	yes
gene:Bra036721	gene:Bra036721	-	A09:5428768-5431219	DB-control	PP5_OX	OK	13.6412	12.1953	-0.161649	-1.23707	0.03045	0.0451523	yes
gene:Bra020381	gene:Bra020381	-	A02:6477460-6478506	DB-control	PP5_OX	OK	20.9268	18.1301	-0.206967	-1.29982	0.0303	0.0449425	yes
gene:Bra014020	gene:Bra014020	-	A08:4492761-4495225	DB-control	PP5_OX	OK	11.8237	10.4821	-0.173746	-1.27097	0.03025	0.0448709	yes
gene:Bra000343	gene:Bra000343	-	A03:10647874-10650500	DB-control	PP5_OX	NOTEST	0	0	0	0	1	1	no
gene:Bra037407	gene:Bra037407	-	A09:678472-679850	DB-control	PP5_OX	OK	2.10525	3.05575	0.537539	1.2887	0.03025	0.0448709	yes
gene:Bra000345	gene:Bra000345	-	A03:10655172-10657038	DB-control	PP5_OX	NOTEST	0.555224	0.474009	-0.228154	0	1	1	no
gene:Bra010225	gene:Bra010225	-	A08:13282727-13286230	DB-control	PP5_OX	OK	1.65419	2.04683	0.307265	1.27615	0.0302	0.0448018	yes
gene:Bra013240	gene:Bra013240	-	A03:19701067-19701825	DB-control	PP5_OX	OK	1.95016	0.933156	-1.0634	-1.42198	0.0302	0.0448018	yes
gene:Bra000348	gene:Bra000348	-	A03:10671589-10678295	DB-control	PP5_OX	NOTEST	0.122383	0.114587	-0.0949616	0	1	1	no
gene:Bra016975	gene:Bra016975	-	A04:17307285-17308919	DB-control	PP5_OX	OK	1.23337	0.625679	-0.979106	-1.37035	0.0302	0.0448018	yes
gene:Bra000350	gene:Bra000350	-	A03:10683924-10684458	DB-control	PP5_OX	NOTEST	0.213069	0	#NAME?	0	1	1	no
gene:Bra021953	gene:Bra021953	-	A02:17797323-17806035	DB-control	PP5_OX	OK	0.563714	0.743975	0.400291	1.29365	0.0302	0.0448018	yes
gene:Bra008136	gene:Bra008136	-	A02:13359219-13362960	DB-control	PP5_OX	OK	7.81957	8.55628	0.129895	1.26291	0.03015	0.0447377	yes
gene:Bra018986	gene:Bra018986	-	A06:886037-888051	DB-control	PP5_OX	OK	39.1901	36.2656	-0.111887	-1.27003	0.03015	0.0447377	yes
gene:Bra000354	gene:Bra000354	-	A03:10706778-10708642	DB-control	PP5_OX	OK	2.80045	2.69602	-0.054831	-0.203433	0.72555	0.765028	no
gene:Bra031556	gene:Bra031556	-	A09:35840585-35844150	DB-control	PP5_OX	OK	9.81438	10.6558	0.118676	1.26637	0.03015	0.0447377	yes
gene:Bra000356	gene:Bra000356	-	A03:10712838-10713503	DB-control	PP5_OX	OK	66.3914	63.3891	-0.0667615	-0.458217	0.43075	0.487864	no
gene:Bra000357	gene:Bra000357	-	A03:10713954-10716028	DB-control	PP5_OX	OK	8.48428	9.13251	0.106219	0.685986	0.2358	0.287542	no
gene:Bra032258	gene:Bra032258	-	A05:12220250-12225989	DB-control	PP5_OX	OK	14.6092	13.3624	-0.128701	-1.25628	0.03015	0.0447377	yes
gene:Bra013372	gene:Bra013372	-	A01:5258258-5261800	DB-control	PP5_OX	OK	7.23546	7.87985	0.123084	1.261	0.0301	0.0446736	yes
gene:Bra000360	gene:Bra000360	-	A03:10723347-10724418	DB-control	PP5_OX	OK	19.6754	18.3122	-0.10359	-0.946016	0.11995	0.157427	no
gene:Bra025489	gene:Bra025489	-	A04:8407275-8410830	DB-control	PP5_OX	OK	2.04449	1.61606	-0.339255	-1.25998	0.03005	0.0446019	yes
gene:Bra000362	gene:Bra000362	-	A03:10731474-10733150	DB-control	PP5_OX	OK	0.683969	0.440359	-0.635253	-0.565617	0.35375	0.410263	no
gene:Bra000363	gene:Bra000363	-	A03:10737981-10739796	DB-control	PP5_OX	NOTEST	0	0	0	0	1	1	no
gene:Bra000364	gene:Bra000364	-	A03:10741142-10741947	DB-control	PP5_OX	OK	11.7885	11.1925	-0.0748485	-0.329955	0.5687	0.621273	no
gene:Bra021885	gene:Bra021885	-	A04:15033261-15035794	DB-control	PP5_OX	OK	4.75218	4.00712	-0.246024	-1.25184	0.03	0.0445302	yes
gene:Bra028068	gene:Bra028068	-	A09:18662829-18663988	DB-control	PP5_OX	OK	153.588	139.462	-0.139198	-1.22789	0.03	0.0445302	yes
gene:Bra000367	gene:Bra000367	-	A03:10766273-10768081	DB-control	PP5_OX	OK	11.9401	13.427	0.16932	1.01352	0.08365	0.113707	no
gene:Bra029164	gene:Bra029164	-	A03:6657404-6659182	DB-control	PP5_OX	OK	8.74343	9.99268	0.192672	1.24505	0.03	0.0445302	yes
gene:Bra000369	gene:Bra000369	-	A03:10775974-10776763	DB-control	PP5_OX	OK	3.70371	3.36971	-0.136348	-0.35877	0.52635	0.581101	no
gene:Bra000370	gene:Bra000370	-	A03:10779422-10782460	DB-control	PP5_OX	NOTEST	0	0	0	0	1	1	no
gene:Bra000371	gene:Bra000371	-	A03:10783388-10786642	DB-control	PP5_OX	OK	6.79603	6.26299	-0.11784	-0.884466	0.1253	0.163802	no
gene:Bra000372	gene:Bra000372	-	A03:10789859-10794409	DB-control	PP5_OX	NOTEST	0.257246	0.160139	-0.683824	0	1	1	no
gene:Bra000373	gene:Bra000373	-	A03:10797618-10798959	DB-control	PP5_OX	NOTEST	0	0	0	0	1	1	no
gene:Bra000374	gene:Bra000374	-	A03:10800099-10804139	DB-control	PP5_OX	OK	18.2146	17.1551	-0.0864619	-0.943151	0.1044	0.138858	no
gene:Bra040123	gene:Bra040123	-	A01:28381570-28385482	DB-control	PP5_OX	OK	11.2136	10.1207	-0.147934	-1.26361	0.03	0.0445302	yes
gene:Bra008017	gene:Bra008017	-	A02:12568527-12570679	DB-control	PP5_OX	OK	1.21361	0.750369	-0.693639	-1.22827	0.0299	0.0443918	yes
gene:Bra014381	gene:Bra014381	-	A04:250564-251579	DB-control	PP5_OX	OK	13.3513	15.2078	0.187836	1.26554	0.0299	0.0443918	yes
gene:Bra013700	gene:Bra013700	-	A01:7232246-7237925	DB-control	PP5_OX	OK	2.11563	2.86913	0.439521	1.23598	0.02985	0.0443226	yes
gene:Bra020786	gene:Bra020786	-	A02:23138744-23139224	DB-control	PP5_OX	OK	1.25359	2.59773	1.05118	1.48392	0.02985	0.0443226	yes
gene:Bra000380	gene:Bra000380	-	A03:10839183-10839669	DB-control	PP5_OX	OK	0.206177	0.867677	2.07328	1.18562	0.04215	0.0608753	no
gene:Bra000381	gene:Bra000381	-	A03:10843197-10843629	DB-control	PP5_OX	NOTEST	1.17833	0.467299	-1.33432	0	1	1	no
gene:Bra023365	gene:Bra023365	-	A02:3024223-3024600	DB-control	PP5_OX	OK	73.0126	83.5044	0.193707	1.26563	0.02985	0.0443226	yes
gene:Bra000383	gene:Bra000383	-	A03:10853437-10854682	DB-control	PP5_OX	OK	10.6195	10.7728	0.0206767	0.138187	0.8108	0.840538	no
gene:Bra008176	gene:Bra008176	-	A02:13590149-13591946	DB-control	PP5_OX	OK	2.65302	1.72294	-0.622765	-1.33083	0.0298	0.0442559	yes
gene:Bra008781	gene:Bra008781	-	A10:13820573-13821523	DB-control	PP5_OX	OK	4.24733	5.3953	0.345145	1.25462	0.0298	0.0442559	yes
gene:Bra012748	gene:Bra012748	-	A03:22450058-22450475	DB-control	PP5_OX	OK	2.67723	0.879405	-1.60614	-1.53128	0.0298	0.0442559	yes
gene:Bra017434	gene:Bra017434	-	A09:15336718-15338392	DB-control	PP5_OX	OK	2.65515	3.25748	0.294963	1.26197	0.0298	0.0442559	yes
gene:Bra000388	gene:Bra000388	-	A03:10871703-10872636	DB-control	PP5_OX	NOTEST	0	0	0	0	1	1	no
gene:Bra000389	gene:Bra000389	-	A03:10874339-10874510	DB-control	PP5_OX	NOTEST	0.655107	0	#NAME?	0	1	1	no
gene:Bra021873	gene:Bra021873	-	A04:14969180-14970920	DB-control	PP5_OX	OK	1.48036	1.93438	0.385919	1.26968	0.0298	0.0442559	yes
gene:Bra029949	gene:Bra029949	-	A01:15178568-15179726	DB-control	PP5_OX	OK	3.78929	2.77676	-0.448523	-1.25364	0.0298	0.0442559	yes
gene:Bra000392	gene:Bra000392	-	A03:10894525-10896635	DB-control	PP5_OX	NOTEST	0	0	0	0	1	1	no
gene:Bra000393	gene:Bra000393	-	A03:10898285-10900672	DB-control	PP5_OX	NOTEST	0	0	0	0	1	1	no
gene:Bra000394	gene:Bra000394	-	A03:10910742-10913795	DB-control	PP5_OX	OK	11.7944	11.019	-0.0981045	-0.767034	0.18465	0.231191	no
gene:Bra000395	gene:Bra000395	-	A03:10917731-10918667	DB-control	PP5_OX	OK	0.305935	0.597364	0.965388	0.98115	0.1506	0.192938	no
gene:Bra000396	gene:Bra000396	-	A03:10926934-10928774	DB-control	PP5_OX	OK	3.4036	3.774	0.149033	0.545983	0.34545	0.401755	no
gene:Bra036555	gene:Bra036555	-	A09:1755743-1756974	DB-control	PP5_OX	OK	0.45566	1.03953	1.1899	1.47334	0.02975	0.0441966	yes
gene:Bra000398	gene:Bra000398	-	A03:10930504-10931162	DB-control	PP5_OX	OK	19.6741	16.4096	-0.261755	-0.643185	0.2717	0.325455	no
gene:Bra040926	gene:Bra040926	-	Scaffold000316:18876-20035	DB-control	PP5_OX	OK	0.275684	0.868926	1.65622	1.69892	0.02975	0.0441966	yes
gene:Bra009874	gene:Bra009874	-	A06:17827308-17829231	DB-control	PP5_OX	OK	1.29538	0.811979	-0.673865	-1.30592	0.0297	0.0441273	yes
gene:Bra000401	gene:Bra000401	-	A03:10937052-10938308	DB-control	PP5_OX	OK	22.037	21.0837	-0.0637972	-0.429303	0.4531	0.510119	no
gene:Bra000402	gene:Bra000402	-	A03:10939040-10939649	DB-control	PP5_OX	NOTEST	0.51258	0.555866	0.116959	0	1	1	no
gene:Bra011863	gene:Bra011863	-	A01:163460-164736	DB-control	PP5_OX	OK	7.63047	9.15014	0.262022	1.33985	0.0297	0.0441273	yes
gene:Bra000404	gene:Bra000404	-	A03:10951205-10952114	DB-control	PP5_OX	NOTEST	0.0799199	0.0800296	0.00197963	0	1	1	no
gene:Bra004669	gene:Bra004669	-	A05:1307860-1309507	DB-control	PP5_OX	OK	1.98828	2.84214	0.515453	1.25676	0.02965	0.044058	yes
gene:Bra000406	gene:Bra000406	-	A03:10957547-10958636	DB-control	PP5_OX	NOTEST	0.173705	0.435307	1.32539	0	1	1	no
gene:Bra000407	gene:Bra000407	-	A03:10965039-10966810	DB-control	PP5_OX	OK	2.91022	2.6552	-0.132306	-0.435125	0.4693	0.525922	no
gene:Bra000408	gene:Bra000408	-	A03:10972275-10973041	DB-control	PP5_OX	OK	2.63546	3.49279	0.406324	0.99213	0.09005	0.121532	no
gene:Bra000409	gene:Bra000409	-	A03:10973811-10981930	DB-control	PP5_OX	OK	18.3657	16.7695	-0.131178	-1.18229	0.04105	0.059437	no
gene:Bra005030	gene:Bra005030	-	A05:3070911-3071622	DB-control	PP5_OX	OK	3.49499	4.74733	0.441828	1.27826	0.02965	0.044058	yes
gene:Bra000411	gene:Bra000411	-	A03:10988632-10989616	DB-control	PP5_OX	NOTEST	0.206463	0.0698565	-1.56342	0	1	1	no
gene:Bra025984	gene:Bra025984	-	A06:6635253-6638218	DB-control	PP5_OX	OK	156.629	142.625	-0.135123	-1.2424	0.02965	0.044058	yes
gene:Bra000413	gene:Bra000413	-	A03:10994180-10995479	DB-control	PP5_OX	OK	35.6193	32.7787	-0.119901	-1.0125	0.07705	0.105583	no
gene:Bra000414	gene:Bra000414	-	A03:10996577-10997460	DB-control	PP5_OX	NOTEST	0	0	0	0	1	1	no
gene:Bra018319	gene:Bra018319	-	A05:7415153-7416482	DB-control	PP5_OX	OK	1.12983	0.726416	-0.637239	-1.30749	0.0296	0.0439912	yes
gene:Bra032775	gene:Bra032775	-	A04:4667406-4667884	DB-control	PP5_OX	OK	372.817	337.38	-0.144094	-1.29173	0.0295	0.0438451	yes
gene:Bra010233	gene:Bra010233	-	A08:13328019-13328810	DB-control	PP5_OX	OK	1.70879	0.870408	-0.973214	-1.3753	0.02945	0.0437732	yes
gene:Bra000418	gene:Bra000418	-	A03:11009922-11010618	DB-control	PP5_OX	NOTEST	0.337392	0.113648	-1.56985	0	1	1	no
gene:Bra016078	gene:Bra016078	-	A07:19544132-19545662	DB-control	PP5_OX	OK	5.65937	4.02558	-0.491442	-1.25186	0.02945	0.0437732	yes
gene:Bra027425	gene:Bra027425	-	A05:20838614-20838800	DB-control	PP5_OX	OK	19.682	9.83029	-1.00157	-1.18367	0.02945	0.0437732	yes
gene:Bra030441	gene:Bra030441	-	A05:11229425-11231295	DB-control	PP5_OX	OK	0.173064	0.773756	2.16057	2.20068	0.02945	0.0437732	yes
gene:Bra000422	gene:Bra000422	-	A03:11034277-11034682	DB-control	PP5_OX	NOTEST	0.366168	0.396177	0.113638	0	1	1	no
gene:Bra032466	gene:Bra032466	-	A09:36193378-36195553	DB-control	PP5_OX	OK	9.23798	10.6324	0.202813	1.27263	0.02945	0.0437732	yes
gene:Bra000424	gene:Bra000424	-	A03:11046638-11048670	DB-control	PP5_OX	OK	10.7786	10.1513	-0.0865028	-0.574826	0.32275	0.378355	no
gene:Bra000425	gene:Bra000425	-	A03:11050695-11051712	DB-control	PP5_OX	NOTEST	0	0	0	0	1	1	no
gene:Bra000426	gene:Bra000426	-	A03:11052664-11053063	DB-control	PP5_OX	NOTEST	0	0	0	0	1	1	no
gene:Bra000427	gene:Bra000427	-	A03:11053646-11056318	DB-control	PP5_OX	NOTEST	0.175935	0.428763	1.28514	0	1	1	no
gene:Bra000428	gene:Bra000428	-	A03:11058001-11058421	DB-control	PP5_OX	OK	72.1727	75.4037	0.0631825	0.53447	0.3563	0.412874	no
gene:Bra036650	gene:Bra036650	-	A09:5869206-5872076	DB-control	PP5_OX	OK	1.27752	0.870983	-0.552628	-1.3336	0.02945	0.0437732	yes
gene:Bra001397	gene:Bra001397	-	A03:16179924-16180565	DB-control	PP5_OX	OK	7.03359	9.5789	0.445599	1.27927	0.0294	0.0437138	yes
gene:Bra000431	gene:Bra000431	-	A03:11067687-11068208	DB-control	PP5_OX	NOTEST	0.0953617	0	#NAME?	0	1	1	no
gene:Bra000432	gene:Bra000432	-	A03:11087121-11088279	DB-control	PP5_OX	OK	1.01987	0.679224	-0.586427	-1.00822	0.0678	0.0938973	no
gene:Bra000433	gene:Bra000433	-	A03:11090007-11092235	DB-control	PP5_OX	NOTEST	0	0	0	0	1	1	no
gene:Bra009972	gene:Bra009972	-	A06:18397716-18399606	DB-control	PP5_OX	OK	1.5134	1.94072	0.3588	1.28351	0.0294	0.0437138	yes
gene:Bra000435	gene:Bra000435	-	A03:11106802-11107657	DB-control	PP5_OX	OK	1.85237	1.21134	-0.612768	-1.24821	0.0422	0.0609308	no
gene:Bra000436	gene:Bra000436	-	A03:11113113-11117791	DB-control	PP5_OX	NOTEST	0	0	0	0	1	1	no
gene:Bra000437	gene:Bra000437	-	A03:11125920-11127186	DB-control	PP5_OX	NOTEST	0	0	0	0	1	1	no
gene:Bra000438	gene:Bra000438	-	A03:11128025-11130015	DB-control	PP5_OX	NOTEST	0	0.122489	inf	0	1	1	no
gene:Bra000439	gene:Bra000439	-	A03:11134382-11135033	DB-control	PP5_OX	NOTEST	0	0.117757	inf	0	1	1	no
gene:Bra000440	gene:Bra000440	-	A03:11135667-11138968	DB-control	PP5_OX	NOTEST	0	0	0	0	1	1	no
gene:Bra037669	gene:Bra037669	-	A04:18245997-18248839	DB-control	PP5_OX	OK	137.186	124.788	-0.136656	-1.26038	0.0294	0.0437138	yes
gene:Bra038911	gene:Bra038911	-	A01:12607072-12609585	DB-control	PP5_OX	OK	12.8442	11.8143	-0.120581	-1.26313	0.0294	0.0437138	yes
gene:Bra000443	gene:Bra000443	-	A03:11154505-11155596	DB-control	PP5_OX	OK	132.819	130.051	-0.030392	-0.261454	0.6522	0.699084	no
gene:Bra000444	gene:Bra000444	-	A03:11158768-11160358	DB-control	PP5_OX	OK	0.602698	0.848061	0.492732	1.0074	0.07915	0.10815	no
gene:Bra006648	gene:Bra006648	-	A03:4464030-4466477	DB-control	PP5_OX	OK	34.7509	38.4543	0.146095	1.25844	0.02935	0.0436493	yes
gene:Bra000446	gene:Bra000446	-	A03:11169255-11170743	DB-control	PP5_OX	OK	3.89082	4.62823	0.250388	0.831793	0.1546	0.1976	no
gene:Bra007694	gene:Bra007694	-	A09:30423729-30426054	DB-control	PP5_OX	OK	12.1377	10.6782	-0.184832	-1.26029	0.02935	0.0436493	yes
gene:Bra000448	gene:Bra000448	-	A03:11177303-11179585	DB-control	PP5_OX	OK	6.88793	7.64038	0.149573	0.921205	0.11105	0.146892	no
gene:Bra000449	gene:Bra000449	-	A03:11181942-11182863	DB-control	PP5_OX	NOTEST	0.239898	0.239098	-0.00481865	0	1	1	no
gene:Bra000450	gene:Bra000450	-	A03:11183967-11184162	DB-control	PP5_OX	OK	33.8062	36.7826	0.121736	0.276066	0.6317	0.679858	no
gene:Bra013696	gene:Bra013696	-	A01:7203822-7204195	DB-control	PP5_OX	OK	3.93894	1.45578	-1.43601	-1.28305	0.02935	0.0436493	yes
gene:Bra021949	gene:Bra021949	-	A02:17757265-17759183	DB-control	PP5_OX	OK	0.821376	1.20008	0.547019	1.30812	0.02935	0.0436493	yes
gene:Bra026413	gene:Bra026413	-	A01:9449536-9450933	DB-control	PP5_OX	OK	1.15488	0.748256	-0.626144	-1.25047	0.02935	0.0436493	yes
gene:Bra002664	gene:Bra002664	-	A10:8338009-8342448	DB-control	PP5_OX	OK	2.61057	3.14055	0.266651	1.25384	0.0293	0.0435873	yes
gene:Bra005463	gene:Bra005463	-	A05:5611288-5614753	DB-control	PP5_OX	OK	9.0689	7.62653	-0.249901	-1.26578	0.0293	0.0435873	yes
gene:Bra000456	gene:Bra000456	-	A03:11200161-11205001	DB-control	PP5_OX	OK	5.86174	6.48386	0.145523	1.11911	0.05275	0.0745604	no
gene:Bra000457	gene:Bra000457	-	A03:11205690-11207759	DB-control	PP5_OX	OK	33.0941	31.9461	-0.0509338	-0.648634	0.2705	0.324195	no
gene:Bra005579	gene:Bra005579	-	A05:6315219-6317176	DB-control	PP5_OX	OK	0.2748	0.87058	1.6636	1.68755	0.0293	0.0435873	yes
gene:Bra000459	gene:Bra000459	-	A03:11211562-11212281	DB-control	PP5_OX	NOTEST	0	0	0	0	1	1	no
gene:Bra010536	gene:Bra010536	-	A08:15026652-15029051	DB-control	PP5_OX	OK	5.13781	6.24959	0.282606	1.2495	0.0293	0.0435873	yes
gene:Bra020142	gene:Bra020142	-	A02:5240915-5243135	DB-control	PP5_OX	OK	4.55546	5.50392	0.272863	1.26046	0.0293	0.0435873	yes
gene:Bra000462	gene:Bra000462	-	A03:11221274-11221745	DB-control	PP5_OX	NOTEST	0.33709	0.256981	-0.391475	0	1	1	no
gene:Bra000463	gene:Bra000463	-	A03:11230311-11232435	DB-control	PP5_OX	OK	2.56362	2.35584	-0.121942	-0.584807	0.33875	0.394662	no
gene:Bra023413	gene:Bra023413	-	A02:3276533-3277937	DB-control	PP5_OX	OK	54.6967	59.1603	0.113175	1.25194	0.02925	0.0435252	yes
gene:Bra009973	gene:Bra009973	-	A06:18400431-18403598	DB-control	PP5_OX	OK	0.424733	0.627195	0.562359	1.25682	0.0292	0.0434533	yes
gene:Bra000466	gene:Bra000466	-	A03:11237521-11239236	DB-control	PP5_OX	OK	4.776	4.93878	0.0483501	0.211209	0.7166	0.757385	no
gene:Bra000467	gene:Bra000467	-	A03:11245301-11245727	DB-control	PP5_OX	NOTEST	0.387645	0.48536	0.324319	0	1	1	no
gene:Bra000468	gene:Bra000468	-	A03:11248293-11248710	DB-control	PP5_OX	OK	0.204891	0.976034	2.25207	1.45562	0.09965	0.133086	no
gene:Bra000469	gene:Bra000469	-	A03:11249282-11255370	DB-control	PP5_OX	NOTEST	0.244492	0.18858	-0.37461	0	1	1	no
gene:Bra000470	gene:Bra000470	-	A03:11262365-11263061	DB-control	PP5_OX	NOTEST	0	0	0	0	1	1	no
gene:Bra000471	gene:Bra000471	-	A03:11265395-11266292	DB-control	PP5_OX	OK	6.03957	7.28334	0.270155	1.21037	0.03835	0.0558077	no
gene:Bra016500	gene:Bra016500	-	A08:18777513-18778386	DB-control	PP5_OX	OK	0.944559	0.301689	-1.64658	-1.76186	0.0292	0.0434533	yes
gene:Bra006803	gene:Bra006803	-	A03:5096263-5096827	DB-control	PP5_OX	OK	2.03103	0.807808	-1.33013	-1.4172	0.0291	0.0433094	yes
gene:Bra008278	gene:Bra008278	-	A02:14296330-14297357	DB-control	PP5_OX	OK	0.348064	1.10159	1.66216	1.86061	0.0291	0.0433094	yes
gene:Bra008898	gene:Bra008898	-	A10:14342656-14343910	DB-control	PP5_OX	OK	4.27795	3.29915	-0.374828	-1.29294	0.0291	0.0433094	yes
gene:Bra000476	gene:Bra000476	-	A03:11289313-11290418	DB-control	PP5_OX	NOTEST	0.0739766	0.116322	0.652977	0	1	1	no
gene:Bra023489	gene:Bra023489	-	A02:3595055-3597826	DB-control	PP5_OX	OK	7.26426	8.31549	0.194985	1.26813	0.0291	0.0433094	yes
gene:Bra000478	gene:Bra000478	-	A03:11293609-11298230	DB-control	PP5_OX	NOTEST	0.281461	0.312475	0.150802	0	1	1	no
gene:Bra035543	gene:Bra035543	-	A02:7613254-7614903	DB-control	PP5_OX	OK	4.17392	5.16029	0.30605	1.2637	0.0291	0.0433094	yes
gene:Bra037071	gene:Bra037071	-	A05:9768992-9771073	DB-control	PP5_OX	OK	2.99988	3.5842	0.256745	1.2687	0.0291	0.0433094	yes
gene:Bra000481	gene:Bra000481	-	A03:11327526-11327838	DB-control	PP5_OX	OK	56.5415	57.1025	0.0142433	0.0827292	0.8818	0.901226	no
gene:Bra000482	gene:Bra000482	-	A03:11333048-11333354	DB-control	PP5_OX	NOTEST	0.308054	0.230465	-0.418635	0	1	1	no
gene:Bra009045	gene:Bra009045	-	A10:15013388-15016079	DB-control	PP5_OX	OK	19.6191	21.2902	0.117931	1.26725	0.02905	0.0432497	yes
gene:Bra000484	gene:Bra000484	-	A03:11336688-11337728	DB-control	PP5_OX	NOTEST	0	0.0307565	inf	0	1	1	no
gene:Bra000485	gene:Bra000485	-	A03:11350173-11351039	DB-control	PP5_OX	OK	3.2598	2.42985	-0.423915	-1.10677	0.061	0.0852623	no
gene:Bra000486	gene:Bra000486	-	A03:11352397-11353667	DB-control	PP5_OX	NOTEST	0.378408	0.336658	-0.168661	0	1	1	no
gene:Bra020292	gene:Bra020292	-	A02:6064233-6064899	DB-control	PP5_OX	OK	1.323	0.532748	-1.31229	-1.41117	0.02905	0.0432497	yes
gene:Bra000488	gene:Bra000488	-	A03:11364545-11365775	DB-control	PP5_OX	NOTEST	0.0288002	0.326411	3.50254	0	1	1	no
gene:Bra000489	gene:Bra000489	-	A03:11366954-11368129	DB-control	PP5_OX	NOTEST	0.0246734	0.153944	2.64137	0	1	1	no
gene:Bra000490	gene:Bra000490	-	A03:11369193-11375685	DB-control	PP5_OX	OK	8.31789	8.95925	0.107161	1.04108	0.07125	0.0983071	no
gene:Bra000491	gene:Bra000491	-	A03:11383293-11384774	DB-control	PP5_OX	NOTEST	0.121684	0	#NAME?	0	1	1	no
gene:Bra007838	gene:Bra007838	-	A09:31189833-31192393	DB-control	PP5_OX	OK	3.57851	2.97054	-0.268634	-1.28633	0.029	0.0431802	yes
gene:Bra014332	gene:Bra014332	-	A08:1567748-1569433	DB-control	PP5_OX	OK	1.23715	0.231114	-2.42034	-1.2878	0.029	0.0431802	yes
gene:Bra019621	gene:Bra019621	-	A06:11699878-11703196	DB-control	PP5_OX	OK	1.34778	1.81331	0.428049	1.29106	0.029	0.0431802	yes
gene:Bra000495	gene:Bra000495	-	A03:11407791-11409095	DB-control	PP5_OX	NOTEST	0.139127	0.117229	-0.24708	0	1	1	no
gene:Bra000496	gene:Bra000496	-	A03:11418309-11418988	DB-control	PP5_OX	OK	1.1281	1.30558	0.210803	0.230127	0.7226	0.762561	no
gene:Bra031874	gene:Bra031874	-	A02:27361933-27362966	DB-control	PP5_OX	OK	1.46592	2.1987	0.584842	1.29076	0.029	0.0431802	yes
gene:Bra002294	gene:Bra002294	-	A10:10436688-10443807	DB-control	PP5_OX	OK	2.47175	3.32744	0.428882	1.27258	0.02895	0.0431155	yes
gene:Bra027006	gene:Bra027006	-	A09:7506256-7512318	DB-control	PP5_OX	OK	5.47212	6.72447	0.297319	1.27042	0.02895	0.0431155	yes
gene:Bra035717	gene:Bra035717	-	A04:12567556-12568073	DB-control	PP5_OX	OK	8.46613	5.40415	-0.647636	-1.26513	0.02895	0.0431155	yes
gene:Bra040247	gene:Bra040247	-	A01:28298476-28298742	DB-control	PP5_OX	OK	349.235	291.781	-0.259312	-1.2707	0.02895	0.0431155	yes
gene:Bra000502	gene:Bra000502	-	A03:11461224-11462052	DB-control	PP5_OX	NOTEST	0	0	0	0	1	1	no
gene:Bra000503	gene:Bra000503	-	A03:11463785-11466186	DB-control	PP5_OX	OK	46.4012	49.3345	0.0884365	0.748483	0.1899	0.236872	no
gene:Bra000504	gene:Bra000504	-	A03:11467517-11468432	DB-control	PP5_OX	NOTEST	0	0	0	0	1	1	no
gene:Bra003591	gene:Bra003591	-	A07:13960142-13962299	DB-control	PP5_OX	OK	15.9512	17.5153	0.134952	1.27498	0.0289	0.0430508	yes
gene:Bra000506	gene:Bra000506	-	A03:11475757-11477581	DB-control	PP5_OX	NOTEST	0.0641688	0	#NAME?	0	1	1	no
gene:Bra003474	gene:Bra003474	-	A07:13377533-13379640	DB-control	PP5_OX	OK	4.39952	5.07276	0.205423	1.29801	0.02885	0.0429787	yes
gene:Bra002522	gene:Bra002522	-	A10:9064514-9065324	DB-control	PP5_OX	OK	392.139	354.877	-0.144047	-1.28346	0.0288	0.0429067	yes
gene:Bra000509	gene:Bra000509	-	A03:11504071-11504921	DB-control	PP5_OX	OK	9.33465	10.5185	0.172259	0.794801	0.17495	0.220338	no
gene:Bra000510	gene:Bra000510	-	A03:11505144-11506154	DB-control	PP5_OX	OK	7.48986	6.16887	-0.279931	-1.00687	0.0785	0.107363	no
gene:Bra002600	gene:Bra002600	-	A10:8635051-8636296	DB-control	PP5_OX	OK	6.71131	8.35577	0.316178	1.28678	0.0288	0.0429067	yes
gene:Bra013619	gene:Bra013619	-	A01:6657649-6658051	DB-control	PP5_OX	OK	2.3744	0.268998	-3.1419	-2.52807	0.0288	0.0429067	yes
gene:Bra017373	gene:Bra017373	-	A09:14752940-14753747	DB-control	PP5_OX	OK	1.38413	0.115519	-3.58277	-2.91588	0.0288	0.0429067	yes
gene:Bra000514	gene:Bra000514	-	A03:11520589-11523206	DB-control	PP5_OX	NOTEST	0	0	0	0	1	1	no
gene:Bra000515	gene:Bra000515	-	A03:11526362-11527514	DB-control	PP5_OX	NOTEST	0.172119	0	#NAME?	0	1	1	no
gene:Bra000516	gene:Bra000516	-	A03:11529496-11530832	DB-control	PP5_OX	OK	12.7905	12.3953	-0.0452785	-0.151543	0.79355	0.825523	no
gene:Bra021930	gene:Bra021930	-	A04:15249025-15252467	DB-control	PP5_OX	OK	1.24998	0.859137	-0.54095	-1.25369	0.0288	0.0429067	yes
gene:Bra027708	gene:Bra027708	-	A09:6780672-6782865	DB-control	PP5_OX	OK	8.58379	7.59839	-0.175922	-1.27939	0.0288	0.0429067	yes
gene:Bra000519	gene:Bra000519	-	A03:11544012-11544699	DB-control	PP5_OX	NOTEST	0.0424248	0.0534072	0.332128	0	1	1	no
gene:Bra000520	gene:Bra000520	-	A03:11549397-11552180	DB-control	PP5_OX	OK	4.91853	5.29209	0.10561	0.561707	0.3291	0.384785	no
gene:Bra000521	gene:Bra000521	-	A03:11556502-11561938	DB-control	PP5_OX	OK	3.18125	0.420436	-2.91963	-2.94509	0.0586	0.0822185	no
gene:Bra000522	gene:Bra000522	-	A03:11565473-11571855	DB-control	PP5_OX	NOTEST	0.0712217	0.0280194	-1.34589	0	1	1	no
gene:Bra029076	gene:Bra029076	-	A03:6225228-6226210	DB-control	PP5_OX	OK	325.803	295.153	-0.142535	-1.2521	0.0288	0.0429067	yes
gene:Bra000524	gene:Bra000524	-	A03:11574575-11576408	DB-control	PP5_OX	OK	0.930046	0.684385	-0.442495	-1.04668	0.07835	0.107185	no
gene:Bra000525	gene:Bra000525	-	A03:11579344-11580658	DB-control	PP5_OX	OK	3.67932	3.98415	0.114832	0.300349	0.60405	0.65423	no
gene:Bra031418	gene:Bra031418	-	A01:17611305-17612630	DB-control	PP5_OX	OK	1.79337	0.0718778	-4.64098	-3.22605	0.0288	0.0429067	yes
gene:Bra000527	gene:Bra000527	-	A03:11587855-11588957	DB-control	PP5_OX	OK	1.96146	1.70496	-0.202197	-0.312055	0.5799	0.631931	no
gene:Bra011100	gene:Bra011100	-	A01:3876927-3878906	DB-control	PP5_OX	OK	8.69214	7.58005	-0.197505	-1.27131	0.02875	0.0428516	yes
gene:Bra028130	gene:Bra028130	-	A04:5986300-5989841	DB-control	PP5_OX	OK	5.42486	6.34882	0.226902	1.2972	0.02875	0.0428516	yes
gene:Bra000530	gene:Bra000530	-	A03:11604800-11605025	DB-control	PP5_OX	NOTEST	0	0.3326	inf	0	1	1	no
gene:Bra030285	gene:Bra030285	-	A04:9360763-9363199	DB-control	PP5_OX	OK	1.77678	1.05228	-0.755742	-1.36669	0.02875	0.0428516	yes
gene:Bra000532	gene:Bra000532	-	A03:11609349-11610303	DB-control	PP5_OX	OK	17.5989	17.3263	-0.0225155	-0.128815	0.8241	0.852139	no
gene:Bra031365	gene:Bra031365	-	A05:15727832-15728678	DB-control	PP5_OX	OK	1.11656	0.503779	-1.14819	-1.52782	0.02875	0.0428516	yes
gene:Bra006658	gene:Bra006658	-	A03:4502477-4502922	DB-control	PP5_OX	OK	1.04346	3.76984	1.85312	1.38351	0.0287	0.0427868	yes
gene:Bra000535	gene:Bra000535	-	A03:11619694-11625107	DB-control	PP5_OX	NOTEST	0.0055792	0.0964105	4.11106	0	1	1	no
gene:Bra007274	gene:Bra007274	-	A09:28308009-28309246	DB-control	PP5_OX	OK	1.66077	2.40909	0.536634	1.30193	0.0287	0.0427868	yes
gene:Bra026067	gene:Bra026067	-	A06:6263507-6265601	DB-control	PP5_OX	OK	2.36912	3.12074	0.397536	1.3084	0.0287	0.0427868	yes
gene:Bra000538	gene:Bra000538	-	A03:11643077-11645462	DB-control	PP5_OX	OK	29.1042	28.0756	-0.0519121	-0.307117	0.58955	0.640957	no
gene:Bra000539	gene:Bra000539	-	A03:11648586-11650139	DB-control	PP5_OX	OK	35.5638	36.6881	0.0449042	0.45078	0.4391	0.496357	no
gene:Bra000540	gene:Bra000540	-	A03:11664559-11666609	DB-control	PP5_OX	NOTEST	0.249368	0.0244643	-3.34953	0	1	1	no
gene:Bra000541	gene:Bra000541	-	A03:11673177-11675491	DB-control	PP5_OX	NOTEST	0	0.0123686	inf	0	1	1	no
gene:Bra003298	gene:Bra003298	-	A07:12468807-12469524	DB-control	PP5_OX	OK	7.11536	8.72519	0.29425	1.29749	0.02865	0.0427196	yes
gene:Bra000543	gene:Bra000543	-	A03:11680485-11683696	DB-control	PP5_OX	OK	45.9913	46.082	0.00284367	0.0243667	0.9681	0.972247	no
gene:Bra016275	gene:Bra016275	-	A08:17652955-17653831	DB-control	PP5_OX	OK	189.169	171.879	-0.138282	-1.29819	0.02865	0.0427196	yes
gene:Bra000783	gene:Bra000783	-	A03:13092013-13093298	DB-control	PP5_OX	OK	15.4283	17.538	0.184904	1.27365	0.0286	0.0426499	yes
gene:Bra005390	gene:Bra005390	-	A05:5168999-5170619	DB-control	PP5_OX	OK	28.4434	26.5118	-0.10146	-1.27514	0.0286	0.0426499	yes
gene:Bra007156	gene:Bra007156	-	A09:27616354-27617338	DB-control	PP5_OX	OK	3.8806	2.95056	-0.395292	-1.30626	0.0286	0.0426499	yes
gene:Bra000548	gene:Bra000548	-	A03:11703964-11706218	DB-control	PP5_OX	OK	0.826833	0.880699	0.091053	0.178181	0.7661	0.801093	no
gene:Bra000549	gene:Bra000549	-	A03:11707672-11710065	DB-control	PP5_OX	OK	1.14153	1.23947	0.118756	0.403778	0.4939	0.54969	no
gene:Bra000550	gene:Bra000550	-	A03:11711850-11715493	DB-control	PP5_OX	OK	2.85206	2.38806	-0.256166	-1.04774	0.07065	0.0975356	no
gene:Bra022969	gene:Bra022969	-	A03:8012839-8014808	DB-control	PP5_OX	OK	79.8413	88.0151	0.140615	1.27007	0.0286	0.0426499	yes
gene:Bra027851	gene:Bra027851	-	A09:9259902-9264532	DB-control	PP5_OX	OK	5.99284	5.31379	-0.173497	-1.28753	0.0286	0.0426499	yes
gene:Bra030517	gene:Bra030517	-	A08:21490043-21495095	DB-control	PP5_OX	OK	2.35674	2.77365	0.234992	1.2855	0.0286	0.0426499	yes
gene:Bra031876	gene:Bra031876	-	A02:27354687-27355665	DB-control	PP5_OX	OK	2.54091	3.43493	0.434935	1.3075	0.0286	0.0426499	yes
gene:Bra000555	gene:Bra000555	-	A03:11750628-11755459	DB-control	PP5_OX	NOTEST	0.343126	0.418066	0.284991	0	1	1	no
gene:Bra000556	gene:Bra000556	-	A03:11759200-11760415	DB-control	PP5_OX	NOTEST	0	0.0415772	inf	0	1	1	no
gene:Bra019987	gene:Bra019987	-	A06:3374912-3375699	DB-control	PP5_OX	OK	4.68774	6.96881	0.57202	1.29306	0.02855	0.0425922	yes
gene:Bra000366	gene:Bra000366	-	A03:10760370-10761204	DB-control	PP5_OX	OK	2.24511	3.18017	0.502322	1.30955	0.0285	0.0425201	yes
gene:Bra000559	gene:Bra000559	-	A03:11771127-11772419	DB-control	PP5_OX	NOTEST	0	0	0	0	1	1	no
gene:Bra000560	gene:Bra000560	-	A03:11774573-11776719	DB-control	PP5_OX	OK	9.8616	8.73369	-0.175231	-1.07551	0.06145	0.085841	no
gene:Bra002636	gene:Bra002636	-	A10:8447624-8448569	DB-control	PP5_OX	OK	1.95791	1.30759	-0.5824	-1.29506	0.0285	0.0425201	yes
gene:Bra000562	gene:Bra000562	-	A03:11787763-11788387	DB-control	PP5_OX	NOTEST	0.180156	0	#NAME?	0	1	1	no
gene:Bra003383	gene:Bra003383	-	A07:12937926-12938559	DB-control	PP5_OX	OK	6.48844	4.44966	-0.544178	-1.28123	0.0285	0.0425201	yes
gene:Bra035005	gene:Bra035005	-	Scaffold000100:816380-818868	DB-control	PP5_OX	OK	2.21963	1.44902	-0.615235	-1.27155	0.02845	0.0424527	yes
gene:Bra000565	gene:Bra000565	-	A03:11807112-11809568	DB-control	PP5_OX	NOTEST	0.316816	0.119564	-1.40587	0	1	1	no
gene:Bra010403	gene:Bra010403	-	A08:14351317-14351812	DB-control	PP5_OX	OK	3.49023	2.03021	-0.781692	-1.37555	0.02835	0.0423059	yes
gene:Bra010764	gene:Bra010764	-	A08:16303745-16305812	DB-control	PP5_OX	OK	15.0576	16.8056	0.158451	1.30653	0.02835	0.0423059	yes
gene:Bra013170	gene:Bra013170	-	A03:20068236-20070910	DB-control	PP5_OX	OK	6.67399	5.72308	-0.221759	-1.26671	0.02835	0.0423059	yes
gene:Bra000569	gene:Bra000569	-	A03:11829167-11830756	DB-control	PP5_OX	NOTEST	0.188795	0.297749	0.657276	0	1	1	no
gene:Bra028562	gene:Bra028562	-	A02:1082883-1083513	DB-control	PP5_OX	OK	1.40922	0.320442	-2.13676	-1.66183	0.02835	0.0423059	yes
gene:Bra009939	gene:Bra009939	-	A06:18216425-18217497	DB-control	PP5_OX	OK	15.107	17.9973	0.252563	1.29208	0.0283	0.0422409	yes
gene:Bra000572	gene:Bra000572	-	A03:11837907-11839691	DB-control	PP5_OX	NOTEST	0.0973615	0	#NAME?	0	1	1	no
gene:Bra037894	gene:Bra037894	-	A09:11386928-11389051	DB-control	PP5_OX	OK	26.8534	29.2644	0.12404	1.26001	0.0283	0.0422409	yes
gene:Bra000574	gene:Bra000574	-	A03:11844888-11845366	DB-control	PP5_OX	OK	119.937	109.192	-0.135406	-0.796267	0.1655	0.209704	no
gene:Bra006202	gene:Bra006202	-	A03:2492428-2496643	DB-control	PP5_OX	OK	9.65047	10.7013	0.149116	1.2738	0.02825	0.042171	yes
gene:Bra000576	gene:Bra000576	-	A03:11859795-11862227	DB-control	PP5_OX	NOTEST	0.590285	0.364842	-0.694139	0	1	1	no
gene:Bra007919	gene:Bra007919	-	A02:11840210-11842077	DB-control	PP5_OX	OK	11.3535	9.83968	-0.206455	-1.26406	0.02825	0.042171	yes
gene:Bra000578	gene:Bra000578	-	A03:11871068-11875707	DB-control	PP5_OX	NOTEST	0.255654	0.0299244	-3.0948	0	1	1	no
gene:Bra000579	gene:Bra000579	-	A03:11878952-11881238	DB-control	PP5_OX	NOTEST	0.37974	0.12453	-1.60852	0	1	1	no
gene:Bra000580	gene:Bra000580	-	A03:11885662-11885905	DB-control	PP5_OX	NOTEST	0	0	0	0	1	1	no
gene:Bra000581	gene:Bra000581	-	A03:11887775-11890193	DB-control	PP5_OX	NOTEST	0.33617	0.236951	-0.504602	0	1	1	no
gene:Bra000582	gene:Bra000582	-	A03:11893315-11895111	DB-control	PP5_OX	NOTEST	0.0246547	0	#NAME?	0	1	1	no
gene:Bra009172	gene:Bra009172	-	A10:15526245-15528542	DB-control	PP5_OX	OK	21.9938	23.9864	0.125118	1.26051	0.02825	0.042171	yes
gene:Bra012094	gene:Bra012094	-	A07:10052985-10054643	DB-control	PP5_OX	OK	1.08227	1.57561	0.541852	1.25378	0.02825	0.042171	yes
gene:Bra022657	gene:Bra022657	-	A02:8212118-8214342	DB-control	PP5_OX	OK	1.11111	1.50346	0.43628	1.29173	0.02825	0.042171	yes
gene:Bra024499	gene:Bra024499	-	A06:16242619-16242829	DB-control	PP5_OX	OK	14.9907	3.5354	-2.08413	-2.13853	0.02825	0.042171	yes
gene:Bra025617	gene:Bra025617	-	A04:7469784-7471225	DB-control	PP5_OX	OK	35.7211	40.9656	0.197635	1.26847	0.02825	0.042171	yes
gene:Bra031295	gene:Bra031295	-	A05:16256474-16258522	DB-control	PP5_OX	OK	10.3319	9.21293	-0.165368	-1.27039	0.02825	0.042171	yes
gene:Bra000589	gene:Bra000589	-	A03:11928359-11929552	DB-control	PP5_OX	OK	2.56954	2.42347	-0.0844393	-0.224894	0.6897	0.733234	no
gene:Bra000590	gene:Bra000590	-	A03:11931234-11931571	DB-control	PP5_OX	NOTEST	0	0	0	0	1	1	no
gene:Bra000591	gene:Bra000591	-	A03:11932855-11934070	DB-control	PP5_OX	NOTEST	0.159404	0.161929	0.0226713	0	1	1	no
gene:Bra017033	gene:Bra017033	-	A04:17012285-17014076	DB-control	PP5_OX	OK	8.8823	7.08188	-0.3268	-1.31195	0.0282	0.0421156	yes
gene:Bra033312	gene:Bra033312	-	A10:4331495-4333849	DB-control	PP5_OX	OK	0.973044	0.575721	-0.757135	-1.336	0.0282	0.0421155	yes
gene:Bra000594	gene:Bra000594	-	A03:11956877-11959344	DB-control	PP5_OX	OK	118.59	109.407	-0.116275	-1.06936	0.06075	0.0849536	no
gene:Bra011209	gene:Bra011209	-	A01:3323639-3324167	DB-control	PP5_OX	OK	40.0434	52.5905	0.393238	1.29848	0.02815	0.0420457	yes
gene:Bra021994	gene:Bra021994	-	A02:18275891-18277127	DB-control	PP5_OX	OK	0.154921	0.675496	2.12441	2.13362	0.02815	0.0420457	yes
gene:Bra040168	gene:Bra040168	-	A01:4426547-4440995	DB-control	PP5_OX	OK	3.6869	3.32922	-0.147226	-1.25088	0.02815	0.0420457	yes
gene:Bra040294	gene:Bra040294	-	A01:28061283-28061918	DB-control	PP5_OX	OK	4.51564	6.15346	0.446468	1.26819	0.02815	0.0420457	yes
gene:Bra040117	gene:Bra040117	-	A01:28357932-28366675	DB-control	PP5_OX	OK	1.24369	1.01283	-0.296234	-1.28888	0.02805	0.0419058	yes
gene:Bra021795	gene:Bra021795	-	A04:14527997-14529017	DB-control	PP5_OX	OK	69.9092	65.1061	-0.10269	-1.2508	0.028	0.0418335	yes
gene:Bra034150	gene:Bra034150	-	A01:27222755-27223827	DB-control	PP5_OX	OK	1.46025	0.841047	-0.795961	-1.33512	0.028	0.0418335	yes
gene:Bra014140	gene:Bra014140	-	A08:3158876-3161071	DB-control	PP5_OX	OK	20.2671	21.8161	0.106253	1.27171	0.02795	0.0417636	yes
gene:Bra000603	gene:Bra000603	-	A03:12006965-12009606	DB-control	PP5_OX	OK	25.0318	23.1575	-0.112286	-1.21002	0.03735	0.0544944	no
gene:Bra022578	gene:Bra022578	-	A02:8764077-8765414	DB-control	PP5_OX	OK	0.639034	1.79411	1.48931	1.73694	0.02795	0.0417636	yes
gene:Bra029977	gene:Bra029977	-	A01:15465998-15466656	DB-control	PP5_OX	OK	2.84405	0.493871	-2.52574	-1.35779	0.02795	0.0417636	yes
gene:Bra000606	gene:Bra000606	-	A03:12021432-12023195	DB-control	PP5_OX	NOTEST	0.160863	0.197523	0.296192	0	1	1	no
gene:Bra000607	gene:Bra000607	-	A03:12024168-12025359	DB-control	PP5_OX	NOTEST	0	0	0	0	1	1	no
gene:Bra000608	gene:Bra000608	-	A03:12029297-12029615	DB-control	PP5_OX	NOTEST	0	0.784508	inf	0	1	1	no
gene:Bra000609	gene:Bra000609	-	A03:12031597-12032539	DB-control	PP5_OX	OK	3.61732	2.39291	-0.596152	-1.07581	0.07355	0.101172	no
gene:Bra000610	gene:Bra000610	-	A03:12034043-12035522	DB-control	PP5_OX	OK	7.92453	7.38384	-0.101955	-0.370497	0.5164	0.571317	no
gene:Bra036570	gene:Bra036570	-	A09:1803290-1809494	DB-control	PP5_OX	OK	1.01887	0.34634	-1.55671	-1.38899	0.02795	0.0417636	yes
gene:Bra009533	gene:Bra009533	-	A10:17118464-17120297	DB-control	PP5_OX	OK	4.98956	4.03599	-0.305989	-1.28878	0.0279	0.0416983	yes
gene:Bra000613	gene:Bra000613	-	A03:12056380-12057317	DB-control	PP5_OX	OK	20.6964	23.1098	0.159124	0.990228	0.0871	0.117921	no
gene:Bra011970	gene:Bra011970	-	A07:10863330-10864197	DB-control	PP5_OX	OK	2.74917	3.71164	0.433063	1.2806	0.0279	0.0416983	yes
gene:Bra013326	gene:Bra013326	-	A01:5010085-5010506	DB-control	PP5_OX	OK	84.1663	73.7043	-0.191493	-1.28376	0.0279	0.0416983	yes
gene:Bra000616	gene:Bra000616	-	A03:12074834-12077071	DB-control	PP5_OX	OK	11.593	11.3301	-0.0330892	-0.32426	0.57485	0.627053	no
gene:Bra028102	gene:Bra028102	-	A04:5749814-5751157	DB-control	PP5_OX	OK	2.3188	0.599325	-1.95197	-1.51631	0.0279	0.0416983	yes
gene:Bra000618	gene:Bra000618	-	A03:12088270-12091261	DB-control	PP5_OX	NOTEST	0.0486591	0.0584676	0.264926	0	1	1	no
gene:Bra031619	gene:Bra031619	-	A09:35556502-35557762	DB-control	PP5_OX	OK	0.141606	0.700574	2.30665	1.84013	0.0279	0.0416983	yes
gene:Bra000620	gene:Bra000620	-	A03:12097905-12101079	DB-control	PP5_OX	OK	11.4462	10.0519	-0.187406	-1.23044	0.0354	0.0518857	no
gene:Bra018219	gene:Bra018219	-	A06:11165369-11167103	DB-control	PP5_OX	OK	7.12742	8.50501	0.254932	1.2568	0.02785	0.0416355	yes
gene:Bra000622	gene:Bra000622	-	A03:12112787-12115252	DB-control	PP5_OX	OK	38.6081	41.9825	0.120882	1.01086	0.08105	0.110476	no
gene:Bra025711	gene:Bra025711	-	A06:7434707-7435991	DB-control	PP5_OX	OK	17.8003	20.1003	0.175318	1.27314	0.02785	0.0416355	yes
gene:Bra000624	gene:Bra000624	-	A03:12120004-12120220	DB-control	PP5_OX	NOTEST	0	0	0	0	1	1	no
gene:Bra000625	gene:Bra000625	-	A03:12123419-12125034	DB-control	PP5_OX	OK	13.6993	15.2704	0.15663	0.932658	0.11775	0.154803	no
gene:Bra000626	gene:Bra000626	-	A03:12126585-12128163	DB-control	PP5_OX	NOTEST	0.173584	0.451262	1.37833	0	1	1	no
gene:Bra000627	gene:Bra000627	-	A03:12129841-12130143	DB-control	PP5_OX	OK	10.4343	12.3813	0.246819	0.333873	0.5447	0.598265	no
gene:Bra000628	gene:Bra000628	-	A03:12134185-12135492	DB-control	PP5_OX	NOTEST	0	0	0	0	1	1	no
gene:Bra000629	gene:Bra000629	-	A03:12139532-12140021	DB-control	PP5_OX	NOTEST	0.122208	0	#NAME?	0	1	1	no
gene:Bra000630	gene:Bra000630	-	A03:12140902-12141838	DB-control	PP5_OX	NOTEST	0	0	0	0	1	1	no
gene:Bra000631	gene:Bra000631	-	A03:12143200-12144134	DB-control	PP5_OX	NOTEST	0	0	0	0	1	1	no
gene:Bra005690	gene:Bra005690	-	A03:138958-142011	DB-control	PP5_OX	OK	28.0863	25.8272	-0.120976	-1.27156	0.02775	0.0414907	yes
gene:Bra000633	gene:Bra000633	-	A03:12148181-12149443	DB-control	PP5_OX	OK	11.4746	11.7269	0.0313859	0.224998	0.7033	0.745639	no
gene:Bra011622	gene:Bra011622	-	A01:1370647-1372051	DB-control	PP5_OX	OK	5.00269	5.87905	0.232879	1.32881	0.02775	0.0414907	yes
gene:Bra032932	gene:Bra032932	-	A02:22434332-22436052	DB-control	PP5_OX	OK	8.5289	9.72198	0.188892	1.27379	0.02775	0.0414907	yes
gene:Bra000636	gene:Bra000636	-	A03:12165813-12167357	DB-control	PP5_OX	OK	24.9018	25.3679	0.0267495	0.209288	0.7222	0.76223	no
gene:Bra010877	gene:Bra010877	-	A08:16902016-16902549	DB-control	PP5_OX	OK	26.0391	19.6019	-0.409686	-1.28329	0.0277	0.041423	yes
gene:Bra015364	gene:Bra015364	-	A10:2258919-2262662	DB-control	PP5_OX	OK	0.775566	0.542202	-0.51642	-1.313	0.0277	0.041423	yes
gene:Bra033396	gene:Bra033396	-	A10:3897660-3899012	DB-control	PP5_OX	OK	1.3585	0.725067	-0.905825	-1.41805	0.0277	0.041423	yes
gene:Bra000640	gene:Bra000640	-	A03:12218918-12220378	DB-control	PP5_OX	NOTEST	0.34947	0	#NAME?	0	1	1	no
gene:Bra000641	gene:Bra000641	-	A03:12223206-12228318	DB-control	PP5_OX	OK	29.2229	31.5122	0.108815	0.982249	0.08885	0.120049	no
gene:Bra038313	gene:Bra038313	-	A02:11334745-11336596	DB-control	PP5_OX	OK	0.849711	1.43753	0.758549	1.31505	0.0277	0.041423	yes
gene:Bra011324	gene:Bra011324	-	A01:2728516-2730754	DB-control	PP5_OX	OK	13.8786	12.1987	-0.186131	-1.27824	0.02765	0.0413577	yes
gene:Bra032825	gene:Bra032825	-	A09:12588995-12590998	DB-control	PP5_OX	OK	39.2305	35.041	-0.16293	-1.29323	0.02765	0.0413577	yes
gene:Bra000645	gene:Bra000645	-	A03:12237111-12238661	DB-control	PP5_OX	NOTEST	0	0	0	0	1	1	no
gene:Bra035044	gene:Bra035044	-	A07:21932675-21934088	DB-control	PP5_OX	OK	0.73394	0.290378	-1.33773	-1.4693	0.02765	0.0413577	yes
gene:Bra005384	gene:Bra005384	-	A05:5135127-5138645	DB-control	PP5_OX	OK	0.868207	0.0448461	-4.27499	-2.44713	0.0276	0.0412899	yes
gene:Bra000648	gene:Bra000648	-	A03:12276212-12277097	DB-control	PP5_OX	OK	12.7308	13.7177	0.107721	0.621529	0.2793	0.333479	no
gene:Bra000649	gene:Bra000649	-	A03:12282800-12284619	DB-control	PP5_OX	NOTEST	0.0128786	0	#NAME?	0	1	1	no
gene:Bra000650	gene:Bra000650	-	A03:12290671-12293105	DB-control	PP5_OX	OK	2.6232	2.51556	-0.0604439	-0.24121	0.6752	0.720327	no
gene:Bra012072	gene:Bra012072	-	A07:10191295-10192198	DB-control	PP5_OX	OK	23.1913	20.1327	-0.20404	-1.28327	0.0276	0.0412899	yes
gene:Bra000652	gene:Bra000652	-	A03:12309479-12310837	DB-control	PP5_OX	NOTEST	0	0	0	0	1	1	no
gene:Bra000653	gene:Bra000653	-	A03:12315396-12316521	DB-control	PP5_OX	NOTEST	0.0255514	0	#NAME?	0	1	1	no
gene:Bra036534	gene:Bra036534	-	A09:1622248-1626703	DB-control	PP5_OX	OK	9.01032	10.0111	0.151943	1.29292	0.0276	0.0412899	yes
gene:Bra000655	gene:Bra000655	-	A03:12318875-12320299	DB-control	PP5_OX	OK	25.163	25.3699	0.0118141	0.10998	0.8506	0.874924	no
gene:Bra006669	gene:Bra006669	-	A03:4547327-4549478	DB-control	PP5_OX	OK	1.59013	1.21894	-0.383522	-1.26618	0.02755	0.0412222	yes
gene:Bra012918	gene:Bra012918	-	A03:21521565-21522653	DB-control	PP5_OX	OK	46.7046	41.8981	-0.156678	-1.27537	0.02755	0.0412222	yes
gene:Bra000658	gene:Bra000658	-	A03:12332507-12333710	DB-control	PP5_OX	NOTEST	0	0.0445979	inf	0	1	1	no
gene:Bra017853	gene:Bra017853	-	A03:30988499-30989550	DB-control	PP5_OX	OK	27.4422	24.7543	-0.148713	-1.26401	0.02755	0.0412222	yes
gene:Bra018949	gene:Bra018949	-	A06:1048838-1050390	DB-control	PP5_OX	OK	2.0519	2.88112	0.489672	1.28671	0.02755	0.0412222	yes
gene:Bra025553	gene:Bra025553	-	A04:7924409-7925090	DB-control	PP5_OX	OK	2.38414	1.4692	-0.698443	-1.34821	0.02755	0.0412222	yes
gene:Bra035905	gene:Bra035905	-	A09:2987732-2989166	DB-control	PP5_OX	OK	0.879401	1.33057	0.597455	1.31858	0.02755	0.0412222	yes
gene:Bra013728	gene:Bra013728	-	A01:7454746-7460615	DB-control	PP5_OX	OK	20.4109	22.644	0.149792	1.26674	0.0275	0.0411614	yes
gene:Bra027583	gene:Bra027583	-	A09:13160548-13161031	DB-control	PP5_OX	OK	1.7667	3.02532	0.776027	1.26268	0.0275	0.0411614	yes
gene:Bra000665	gene:Bra000665	-	A03:12359557-12360661	DB-control	PP5_OX	NOTEST	0.206131	0.175728	-0.23022	0	1	1	no
gene:Bra000666	gene:Bra000666	-	A03:12361765-12362252	DB-control	PP5_OX	OK	46.3699	42.8083	-0.115299	-0.487082	0.39805	0.454989	no
gene:Bra023616	gene:Bra023616	-	A02:4201598-4202967	DB-control	PP5_OX	OK	6.17365	4.94713	-0.319534	-1.31196	0.02745	0.0410913	yes
gene:Bra000668	gene:Bra000668	-	A03:12373412-12374487	DB-control	PP5_OX	NOTEST	0	0	0	0	1	1	no
gene:Bra000669	gene:Bra000669	-	A03:12377786-12378227	DB-control	PP5_OX	NOTEST	0.435239	0.502502	0.207323	0	1	1	no
gene:Bra007361	gene:Bra007361	-	A09:28813963-28815533	DB-control	PP5_OX	OK	1.46686	2.12548	0.535058	1.25309	0.0274	0.0410188	yes
gene:Bra000671	gene:Bra000671	-	A03:12384011-12384713	DB-control	PP5_OX	NOTEST	0	0	0	0	1	1	no
gene:Bra000672	gene:Bra000672	-	A03:12385004-12386514	DB-control	PP5_OX	OK	2.02311	1.7918	-0.175172	-0.453489	0.426	0.483213	no
gene:Bra011478	gene:Bra011478	-	A01:2014211-2015095	DB-control	PP5_OX	OK	7.08318	4.85464	-0.545033	-1.25213	0.0274	0.0410188	yes
gene:Bra000674	gene:Bra000674	-	A03:12393168-12396883	DB-control	PP5_OX	OK	3.84861	3.85351	0.00183551	0.010377	0.9861	0.98719	no
gene:Bra012860	gene:Bra012860	-	A03:21889048-21891803	DB-control	PP5_OX	OK	2.84248	3.72729	0.390974	1.34093	0.0274	0.0410188	yes
gene:Bra000676	gene:Bra000676	-	A03:12404067-12404436	DB-control	PP5_OX	OK	0.819483	2.16625	1.40241	1.35699	0.11035	0.146091	no
gene:Bra000677	gene:Bra000677	-	A03:12405088-12406147	DB-control	PP5_OX	OK	0.291712	0.716479	1.29638	1.39056	0.03525	0.0516832	no
gene:Bra000678	gene:Bra000678	-	A03:12407378-12408557	DB-control	PP5_OX	NOTEST	0.0418369	0	#NAME?	0	1	1	no
gene:Bra000679	gene:Bra000679	-	A03:12409074-12411370	DB-control	PP5_OX	OK	2.04574	2.62169	0.357873	1.18436	0.03785	0.0551443	no
gene:Bra000680	gene:Bra000680	-	A03:12417251-12418112	DB-control	PP5_OX	OK	15.744	17.4176	0.145747	0.855275	0.1349	0.174742	no
gene:Bra022864	gene:Bra022864	-	A03:7458875-7460906	DB-control	PP5_OX	OK	3.14242	3.92568	0.321068	1.30145	0.0274	0.0410188	yes
gene:Bra000682	gene:Bra000682	-	A03:12431396-12431693	DB-control	PP5_OX	NOTEST	0	0	0	0	1	1	no
gene:Bra034312	gene:Bra034312	-	A04:11831525-11833909	DB-control	PP5_OX	OK	3.42234	2.76983	-0.305188	-1.2668	0.0274	0.0410188	yes
gene:Bra000684	gene:Bra000684	-	A03:12447877-12450384	DB-control	PP5_OX	OK	50.4984	49.6302	-0.0250181	-0.216439	0.70385	0.746162	no
gene:Bra008272	gene:Bra008272	-	A02:14261185-14262459	DB-control	PP5_OX	OK	2.73465	1.90909	-0.518473	-1.28559	0.02735	0.0409556	yes
gene:Bra000686	gene:Bra000686	-	A03:12461075-12463400	DB-control	PP5_OX	NOTEST	0.252234	0.593644	1.23484	0	1	1	no
gene:Bra014285	gene:Bra014285	-	A08:1953653-1954145	DB-control	PP5_OX	OK	114.365	104.682	-0.127624	-1.27829	0.0273	0.0408831	yes
gene:Bra008992	gene:Bra008992	-	A10:14757470-14758244	DB-control	PP5_OX	OK	17.8816	21.2848	0.251346	1.26523	0.02725	0.0408105	yes
gene:Bra022938	gene:Bra022938	-	A03:7861231-7862735	DB-control	PP5_OX	OK	41.2127	45.3561	0.138206	1.28043	0.02725	0.0408105	yes
gene:Bra023033	gene:Bra023033	-	A03:8319872-8321596	DB-control	PP5_OX	OK	148.574	135.01	-0.138114	-1.2694	0.02725	0.0408105	yes
gene:Bra021278	gene:Bra021278	-	A01:22828566-22834571	DB-control	PP5_OX	OK	13.1167	11.947	-0.134751	-1.32875	0.0272	0.0407426	yes
gene:Bra033011	gene:Bra033011	-	A02:21932478-21934499	DB-control	PP5_OX	OK	102.811	92.8466	-0.147075	-1.26111	0.0272	0.0407426	yes
gene:Bra026340	gene:Bra026340	-	A01:9935745-9936974	DB-control	PP5_OX	OK	1.78775	2.7845	0.639273	1.3356	0.0271	0.0405974	yes
gene:Bra019656	gene:Bra019656	-	A06:5157004-5158620	DB-control	PP5_OX	OK	0.170197	0.794044	2.22201	2.02386	0.02705	0.0405248	yes
gene:Bra000695	gene:Bra000695	-	A03:12514324-12514735	DB-control	PP5_OX	NOTEST	0	0	0	0	1	1	no
gene:Bra000696	gene:Bra000696	-	A03:12525133-12526947	DB-control	PP5_OX	NOTEST	0.198984	0	#NAME?	0	1	1	no
gene:Bra000697	gene:Bra000697	-	A03:12532788-12534963	DB-control	PP5_OX	NOTEST	0	0	0	0	1	1	no
gene:Bra010136	gene:Bra010136	-	A06:19650429-19651936	DB-control	PP5_OX	OK	4.00121	3.10743	-0.364715	-1.29215	0.027	0.0404522	yes
gene:Bra024155	gene:Bra024155	-	A03:27267279-27269060	DB-control	PP5_OX	OK	8.07665	9.30301	0.203941	1.26828	0.027	0.0404522	yes
gene:Bra036363	gene:Bra036363	-	A02:22901554-22902019	DB-control	PP5_OX	OK	3.05226	4.69086	0.619974	1.25933	0.027	0.0404522	yes
gene:Bra012084	gene:Bra012084	-	A07:10125014-10125437	DB-control	PP5_OX	OK	2.97712	0.612875	-2.28025	-1.87545	0.02695	0.0403842	yes
gene:Bra000702	gene:Bra000702	-	A03:12548687-12551182	DB-control	PP5_OX	OK	27.62	27.9063	0.0148796	0.182385	0.75315	0.789186	no
gene:Bra000703	gene:Bra000703	-	A03:12552183-12552777	DB-control	PP5_OX	NOTEST	0.216157	0.485024	1.16598	0	1	1	no
gene:Bra000704	gene:Bra000704	-	A03:12553355-12554806	DB-control	PP5_OX	NOTEST	0.127904	0.0840988	-0.604899	0	1	1	no
gene:Bra000705	gene:Bra000705	-	A03:12555448-12555992	DB-control	PP5_OX	OK	35.4768	36.5176	0.0417187	0.243909	0.6738	0.719184	no
gene:Bra017399	gene:Bra017399	-	A09:14996382-14997480	DB-control	PP5_OX	OK	2.24112	4.59703	1.03648	1.53667	0.02695	0.0403842	yes
gene:Bra000707	gene:Bra000707	-	A03:12566480-12570728	DB-control	PP5_OX	OK	1.85377	1.59174	-0.219856	-0.712009	0.2155	0.26545	no
gene:Bra021275	gene:Bra021275	-	A01:22865736-22867495	DB-control	PP5_OX	OK	19.1377	17.3318	-0.142999	-1.26582	0.02695	0.0403842	yes
gene:Bra000709	gene:Bra000709	-	A03:12574944-12576496	DB-control	PP5_OX	NOTEST	0.016621	0	#NAME?	0	1	1	no
gene:Bra033397	gene:Bra033397	-	A10:3882014-3883390	DB-control	PP5_OX	OK	0.865368	0.405296	-1.09434	-1.44708	0.02695	0.0403842	yes
gene:Bra037436	gene:Bra037436	-	A06:21473901-21474410	DB-control	PP5_OX	OK	3.19644	0.66674	-2.26127	-1.85712	0.02695	0.0403842	yes
gene:Bra000712	gene:Bra000712	-	A03:12601480-12602921	DB-control	PP5_OX	NOTEST	0.137429	0.0658581	-1.06125	0	1	1	no
gene:Bra040931	gene:Bra040931	-	Scaffold000317:18614-19037	DB-control	PP5_OX	OK	8.9976	11.9031	0.403723	1.26829	0.02695	0.0403842	yes
gene:Bra002797	gene:Bra002797	-	A10:7508023-7509249	DB-control	PP5_OX	OK	5.91103	4.84297	-0.287517	-1.28288	0.0269	0.0403231	yes
gene:Bra012409	gene:Bra012409	-	A07:7867645-7867966	DB-control	PP5_OX	OK	4.94924	1.01896	-2.28011	-1.89166	0.0269	0.0403231	yes
gene:Bra000716	gene:Bra000716	-	A03:12639863-12640796	DB-control	PP5_OX	OK	0.906492	0.710335	-0.351795	-0.558548	0.3273	0.382885	no
gene:Bra000717	gene:Bra000717	-	A03:12646370-12648452	DB-control	PP5_OX	NOTEST	0.263397	0.209115	-0.332938	0	1	1	no
gene:Bra000718	gene:Bra000718	-	A03:12655200-12658249	DB-control	PP5_OX	NOTEST	0.499629	0.144488	-1.78991	0	1	1	no
gene:Bra024086	gene:Bra024086	-	A03:27727728-27731007	DB-control	PP5_OX	OK	35.1493	31.7798	-0.145387	-1.27716	0.0269	0.0403231	yes
gene:Bra000720	gene:Bra000720	-	A03:12664720-12665954	DB-control	PP5_OX	OK	2.10998	2.4602	0.221549	0.648499	0.26355	0.316704	no
gene:Bra009094	gene:Bra009094	-	A10:15229289-15231853	DB-control	PP5_OX	OK	36.2361	32.8498	-0.141543	-1.29969	0.02685	0.0402551	yes
gene:Bra000722	gene:Bra000722	-	A03:12673560-12673815	DB-control	PP5_OX	OK	35.1456	38.4104	0.128151	0.446177	0.4434	0.500464	no
gene:Bra000723	gene:Bra000723	-	A03:12675325-12675784	DB-control	PP5_OX	NOTEST	0.159569	0	#NAME?	0	1	1	no
gene:Bra040324	gene:Bra040324	-	A04:18482430-18483701	DB-control	PP5_OX	OK	1.22447	0.525924	-1.21923	-1.51506	0.02685	0.0402551	yes
gene:Bra000725	gene:Bra000725	-	A03:12682138-12683812	DB-control	PP5_OX	NOTEST	0	0	0	0	1	1	no
gene:Bra000726	gene:Bra000726	-	A03:12684735-12684963	DB-control	PP5_OX	NOTEST	0	0	0	0	1	1	no
gene:Bra000727	gene:Bra000727	-	A03:12688422-12691442	DB-control	PP5_OX	NOTEST	0	0	0	0	1	1	no
gene:Bra025813	gene:Bra025813	-	A06:8160851-8161724	DB-control	PP5_OX	OK	1.43017	0.336374	-2.08804	-2.20191	0.0268	0.0401847	yes
gene:Bra025980	gene:Bra025980	-	A06:6657060-6658815	DB-control	PP5_OX	OK	11.4756	9.30938	-0.301807	-1.29477	0.0268	0.0401847	yes
gene:Bra000730	gene:Bra000730	-	A03:12702639-12704110	DB-control	PP5_OX	OK	6.83135	6.27702	-0.12209	-0.433623	0.45815	0.515031	no
gene:Bra000731	gene:Bra000731	-	A03:12710364-12713086	DB-control	PP5_OX	NOTEST	0.062916	0	#NAME?	0	1	1	no
gene:Bra000732	gene:Bra000732	-	A03:12714236-12716134	DB-control	PP5_OX	NOTEST	0.513976	0.320331	-0.682138	0	1	1	no
gene:Bra040839	gene:Bra040839	-	A08:12066111-12067089	DB-control	PP5_OX	OK	0.476748	1.01541	1.09076	1.48145	0.0268	0.0401847	yes
gene:Bra005476	gene:Bra005476	-	A05:5715736-5716540	DB-control	PP5_OX	OK	14.397	10.7124	-0.426483	-1.30142	0.02675	0.0401166	yes
gene:Bra000735	gene:Bra000735	-	A03:12744787-12747350	DB-control	PP5_OX	NOTEST	0	0	0	0	1	1	no
gene:Bra031294	gene:Bra031294	-	A05:16262725-16264335	DB-control	PP5_OX	OK	25.1897	23.303	-0.112318	-1.27554	0.02675	0.0401166	yes
gene:Bra040789	gene:Bra040789	-	Scaffold000258:29732-32605	DB-control	PP5_OX	OK	1.30362	0.907277	-0.522906	-1.30301	0.02675	0.0401166	yes
gene:Bra000738	gene:Bra000738	-	A03:12771025-12785454	DB-control	PP5_OX	NOTEST	0.00467681	0.0229615	2.29562	0	1	1	no
gene:Bra002908	gene:Bra002908	-	A10:6835159-6840036	DB-control	PP5_OX	OK	1.79635	2.10286	0.227283	1.29057	0.0267	0.0400485	yes
gene:Bra002777	gene:Bra002777	-	A10:7644048-7647035	DB-control	PP5_OX	OK	1.08267	0.617774	-0.80944	-1.36706	0.02665	0.0399758	yes
gene:Bra000741	gene:Bra000741	-	A03:12799590-12801709	DB-control	PP5_OX	OK	68.8611	70.7171	0.0383702	0.330685	0.5584	0.611293	no
gene:Bra020013	gene:Bra020013	-	A06:3277122-3287675	DB-control	PP5_OX	OK	13.717	12.59	-0.123683	-1.31533	0.02665	0.0399758	yes
gene:Bra000743	gene:Bra000743	-	A03:12811468-12815351	DB-control	PP5_OX	OK	21.6618	23.3428	0.107825	0.938166	0.10685	0.141858	no
gene:Bra000744	gene:Bra000744	-	A03:12817057-12819461	DB-control	PP5_OX	OK	2.02815	1.62869	-0.316453	-1.14992	0.0483	0.0688113	no
gene:Bra000745	gene:Bra000745	-	A03:12825507-12827497	DB-control	PP5_OX	OK	1.45646	1.16255	-0.325164	-0.801287	0.16575	0.209991	no
gene:Bra000746	gene:Bra000746	-	A03:12828662-12831776	DB-control	PP5_OX	NOTEST	0.0275658	0.0233242	-0.241048	0	1	1	no
gene:Bra026701	gene:Bra026701	-	A09:33273829-33274606	DB-control	PP5_OX	OK	1.63578	3.05238	0.899958	1.322	0.02665	0.0399758	yes
gene:Bra000748	gene:Bra000748	-	A03:12850506-12851498	DB-control	PP5_OX	NOTEST	0	0	0	0	1	1	no
gene:Bra029961	gene:Bra029961	-	A01:15330068-15330593	DB-control	PP5_OX	OK	6.64557	9.12116	0.456825	1.27324	0.02665	0.0399758	yes
gene:Bra000750	gene:Bra000750	-	A03:12858785-12860431	DB-control	PP5_OX	NOTEST	0	0	0	0	1	1	no
gene:Bra000751	gene:Bra000751	-	A03:12862431-12863424	DB-control	PP5_OX	NOTEST	0	0.0247524	inf	0	1	1	no
gene:Bra000752	gene:Bra000752	-	A03:12873504-12875905	DB-control	PP5_OX	NOTEST	0	0	0	0	1	1	no
gene:Bra000753	gene:Bra000753	-	A03:12891101-12894510	DB-control	PP5_OX	NOTEST	0	0	0	0	1	1	no
gene:Bra040086	gene:Bra040086	-	A08:13044194-13046233	DB-control	PP5_OX	OK	5.08319	4.11755	-0.30395	-1.28109	0.02665	0.0399758	yes
gene:Bra000755	gene:Bra000755	-	A03:12900475-12901810	DB-control	PP5_OX	OK	0.878898	0.617925	-0.508265	-0.669496	0.22285	0.273516	no
gene:Bra013659	gene:Bra013659	-	A01:6906336-6908847	DB-control	PP5_OX	OK	3.43964	4.11207	0.257608	1.2722	0.0266	0.0399122	yes
gene:Bra020444	gene:Bra020444	-	A02:6808090-6811027	DB-control	PP5_OX	OK	4.12703	3.42766	-0.267881	-1.28795	0.0266	0.0399122	yes
gene:Bra031545	gene:Bra031545	-	A09:35893863-35896638	DB-control	PP5_OX	OK	4.66437	5.61328	0.267164	1.3207	0.0266	0.0399122	yes
gene:Bra000759	gene:Bra000759	-	A03:12917659-12921594	DB-control	PP5_OX	OK	5.18235	4.91151	-0.0774402	-0.642524	0.2659	0.319206	no
gene:Bra007932	gene:Bra007932	-	A02:11942646-11943955	DB-control	PP5_OX	OK	8.88596	6.58525	-0.43229	-1.29183	0.0265	0.0397689	yes
gene:Bra000761	gene:Bra000761	-	A03:12928009-12932385	DB-control	PP5_OX	NOTEST	0.269194	0.210137	-0.357315	0	1	1	no
gene:Bra000762	gene:Bra000762	-	A03:12933180-12934827	DB-control	PP5_OX	OK	1.81302	1.41955	-0.352961	-0.895796	0.13405	0.173779	no
gene:Bra000763	gene:Bra000763	-	A03:12937023-12938181	DB-control	PP5_OX	NOTEST	0	0	0	0	1	1	no
gene:Bra000764	gene:Bra000764	-	A03:12939982-12940651	DB-control	PP5_OX	NOTEST	0	0	0	0	1	1	no
gene:Bra000765	gene:Bra000765	-	A03:12942422-12942629	DB-control	PP5_OX	NOTEST	0	0	0	0	1	1	no
gene:Bra011389	gene:Bra011389	-	A01:2392584-2393151	DB-control	PP5_OX	OK	1.52651	2.6535	0.797662	1.34702	0.0265	0.0397689	yes
gene:Bra038771	gene:Bra038771	-	A03:24159136-24164055	DB-control	PP5_OX	OK	6.33196	5.19642	-0.285136	-1.30069	0.0265	0.0397689	yes
gene:Bra005614	gene:Bra005614	-	A05:6534716-6535547	DB-control	PP5_OX	OK	19.4689	21.9921	0.175815	1.27208	0.02645	0.0397007	yes
gene:Bra009072	gene:Bra009072	-	A10:15136898-15139835	DB-control	PP5_OX	OK	1.95843	2.44251	0.31867	1.32118	0.02645	0.0397007	yes
gene:Bra000770	gene:Bra000770	-	A03:12963855-12964833	DB-control	PP5_OX	NOTEST	0	0	0	0	1	1	no
gene:Bra000772	gene:Bra000772	-	A03:12967349-12967847	DB-control	PP5_OX	NOTEST	0.0701412	0	#NAME?	0	1	1	no
gene:Bra010284	gene:Bra010284	-	A08:13626214-13628105	DB-control	PP5_OX	OK	0.805799	0.304123	-1.40577	-1.54712	0.02645	0.0397007	yes
gene:Bra021397	gene:Bra021397	-	A01:25382494-25386939	DB-control	PP5_OX	OK	4.32749	5.11276	0.240571	1.26621	0.02645	0.0397007	yes
gene:Bra019758	gene:Bra019758	-	A06:4588336-4589135	DB-control	PP5_OX	OK	0.932138	1.78753	0.939349	1.4944	0.0264	0.0396347	yes
gene:Bra013649	gene:Bra013649	-	A01:6862585-6863566	DB-control	PP5_OX	OK	0.805591	0.166603	-2.27364	-1.90346	0.02635	0.0395619	yes
gene:Bra000777	gene:Bra000777	-	A03:13024536-13024938	DB-control	PP5_OX	OK	0.983303	0.762816	-0.366301	-0.259433	0.67555	0.720612	no
gene:Bra029876	gene:Bra029876	-	A05:21901243-21902261	DB-control	PP5_OX	OK	0.22603	0.907694	2.00569	2.08961	0.02635	0.0395619	yes
gene:Bra022520	gene:Bra022520	-	A02:9285044-9288103	DB-control	PP5_OX	OK	38.1413	34.5787	-0.141471	-1.26114	0.0263	0.0394914	yes
gene:Bra000780	gene:Bra000780	-	A03:13071398-13072760	DB-control	PP5_OX	NOTEST	0	0	0	0	1	1	no
gene:Bra032870	gene:Bra032870	-	A09:12270052-12270838	DB-control	PP5_OX	OK	1.04233	1.78292	0.774438	1.36598	0.0263	0.0394914	yes
gene:Bra001352	gene:Bra001352	-	A03:15965911-15966835	DB-control	PP5_OX	OK	6.4001	5.14583	-0.314691	-1.27203	0.02625	0.0394208	yes
gene:Bra003235	gene:Bra003235	-	A07:12064359-12065942	DB-control	PP5_OX	OK	3.33943	4.5465	0.445154	1.30754	0.0262	0.039348	yes
gene:Bra000784	gene:Bra000784	-	A03:13094485-13095094	DB-control	PP5_OX	NOTEST	0.086917	0.236615	1.44483	0	1	1	no
gene:Bra015834	gene:Bra015834	-	A07:20620517-20621006	DB-control	PP5_OX	OK	0.490614	1.23904	1.33656	1.22027	0.0262	0.039348	yes
gene:Bra000786	gene:Bra000786	-	A03:13099193-13099757	DB-control	PP5_OX	NOTEST	0	0	0	0	1	1	no
gene:Bra000787	gene:Bra000787	-	A03:13106409-13108078	DB-control	PP5_OX	OK	44.368	47.4787	0.0977612	1.16799	0.04135	0.0598219	no
gene:Bra000788	gene:Bra000788	-	A03:13109042-13118335	DB-control	PP5_OX	OK	2.05611	2.16653	0.0754656	0.356653	0.5346	0.588724	no
gene:Bra030179	gene:Bra030179	-	A07:5899501-5902525	DB-control	PP5_OX	OK	80.9964	73.5219	-0.139684	-1.26723	0.0262	0.039348	yes
gene:Bra000790	gene:Bra000790	-	A03:13136388-13136934	DB-control	PP5_OX	NOTEST	0	0	0	0	1	1	no
gene:Bra003064	gene:Bra003064	-	A10:5519166-5521320	DB-control	PP5_OX	OK	17.8469	19.9219	0.158686	1.31092	0.02615	0.0392796	yes
gene:Bra000792	gene:Bra000792	-	A03:13145453-13146152	DB-control	PP5_OX	NOTEST	0	0	0	0	1	1	no
gene:Bra028285	gene:Bra028285	-	A01:18942550-18943722	DB-control	PP5_OX	OK	2.34996	1.62695	-0.530464	-1.32191	0.02615	0.0392796	yes
gene:Bra000794	gene:Bra000794	-	A03:13157621-13160076	DB-control	PP5_OX	NOTEST	0.245837	0.0867714	-1.50241	0	1	1	no
gene:Bra000795	gene:Bra000795	-	A03:13161181-13162375	DB-control	PP5_OX	NOTEST	0.0580957	0.0831335	0.516998	0	1	1	no
gene:Bra033882	gene:Bra033882	-	A05:14778334-14780303	DB-control	PP5_OX	OK	4.00394	3.18907	-0.328283	-1.30595	0.02615	0.0392796	yes
gene:Bra004286	gene:Bra004286	-	A07:17791942-17793614	DB-control	PP5_OX	OK	9.59607	7.95763	-0.270105	-1.29463	0.0261	0.0392112	yes
gene:Bra000798	gene:Bra000798	-	A03:13200774-13203156	DB-control	PP5_OX	NOTEST	0.0881649	0.0580793	-0.602179	0	1	1	no
gene:Bra030797	gene:Bra030797	-	A08:20333133-20334616	DB-control	PP5_OX	OK	19.6459	22.3282	0.184641	1.28608	0.0261	0.0392112	yes
gene:Bra033666	gene:Bra033666	-	A06:25732391-25732949	DB-control	PP5_OX	OK	6.17845	8.18797	0.40626	1.31928	0.0261	0.0392112	yes
gene:Bra000801	gene:Bra000801	-	A03:13227510-13227951	DB-control	PP5_OX	NOTEST	0	0	0	0	1	1	no
gene:Bra010238	gene:Bra010238	-	A08:13354561-13355568	DB-control	PP5_OX	OK	19.1458	21.4288	0.162523	1.31407	0.02605	0.0391428	yes
gene:Bra005260	gene:Bra005260	-	A05:4336648-4337812	DB-control	PP5_OX	OK	1.01714	0.343186	-1.56745	-1.43396	0.02595	0.0389948	yes
gene:Bra000804	gene:Bra000804	-	A03:13241556-13241904	DB-control	PP5_OX	OK	1.05071	1.25911	0.261042	0.214258	0.73705	0.775255	no
gene:Bra000805	gene:Bra000805	-	A03:13252635-13256280	DB-control	PP5_OX	NOTEST	0.0144269	0	#NAME?	0	1	1	no
gene:Bra015899	gene:Bra015899	-	A07:20309774-20311145	DB-control	PP5_OX	OK	1.28245	0.748673	-0.776494	-1.39718	0.02595	0.0389948	yes
gene:Bra000807	gene:Bra000807	-	A03:13269747-13273793	DB-control	PP5_OX	OK	7.02103	6.69034	-0.069603	-0.468485	0.42345	0.480653	no
gene:Bra032605	gene:Bra032605	-	A09:36797561-36799675	DB-control	PP5_OX	OK	6.96577	8.05229	0.209116	1.28921	0.02595	0.0389948	yes
gene:Bra000809	gene:Bra000809	-	A03:13284612-13289693	DB-control	PP5_OX	OK	11.0208	11.828	0.101974	1.0782	0.061	0.0852623	no
gene:Bra002793	gene:Bra002793	-	A10:7523089-7524106	DB-control	PP5_OX	OK	2.06184	2.9327	0.508299	1.31532	0.0259	0.0389263	yes
gene:Bra015560	gene:Bra015560	-	A10:1011829-1014199	DB-control	PP5_OX	OK	0.41906	0.736276	0.813091	1.39899	0.0259	0.0389263	yes
gene:Bra000812	gene:Bra000812	-	A03:13299406-13300058	DB-control	PP5_OX	NOTEST	0.430226	0	#NAME?	0	1	1	no
gene:Bra013796	gene:Bra013796	-	A01:7784038-7784569	DB-control	PP5_OX	OK	31.7861	36.1796	0.186781	1.2813	0.02585	0.0388556	yes
gene:Bra006073	gene:Bra006073	-	A03:1869658-1872168	DB-control	PP5_OX	OK	11.7097	13.3302	0.18699	1.30269	0.0258	0.0387827	yes
gene:Bra007401	gene:Bra007401	-	A09:29005295-29007527	DB-control	PP5_OX	OK	1.49402	0.736788	-1.01988	-1.5065	0.0258	0.0387827	yes
gene:Bra000816	gene:Bra000816	-	A03:13325373-13326461	DB-control	PP5_OX	NOTEST	0	0	0	0	1	1	no
gene:Bra000817	gene:Bra000817	-	A03:13327647-13328853	DB-control	PP5_OX	NOTEST	0	0	0	0	1	1	no
gene:Bra010750	gene:Bra010750	-	A08:16253710-16256694	DB-control	PP5_OX	OK	2.65701	2.14608	-0.308105	-1.31	0.0258	0.0387827	yes
gene:Bra000819	gene:Bra000819	-	A03:13334652-13335598	DB-control	PP5_OX	NOTEST	0	0	0	0	1	1	no
gene:Bra000820	gene:Bra000820	-	A03:13339418-13344344	DB-control	PP5_OX	OK	8.26778	7.58762	-0.123852	-0.964452	0.0964	0.129206	no
gene:Bra027837	gene:Bra027837	-	A09:9139548-9140172	DB-control	PP5_OX	OK	5.70332	8.35175	0.550277	1.33671	0.0258	0.0387827	yes
gene:Bra000199	gene:Bra000199	-	A03:9833255-9834171	DB-control	PP5_OX	OK	2.34145	1.14426	-1.03298	-1.3327	0.02575	0.0387164	yes
gene:Bra000823	gene:Bra000823	-	A03:13361348-13362854	DB-control	PP5_OX	OK	9.33514	9.94243	0.0909257	0.592097	0.30585	0.36096	no
gene:Bra000824	gene:Bra000824	-	A03:13364766-13366491	DB-control	PP5_OX	NOTEST	0	0	0	0	1	1	no
gene:Bra000825	gene:Bra000825	-	A03:13371743-13372962	DB-control	PP5_OX	OK	27.644	25.1943	-0.133867	-1.19009	0.04015	0.0582206	no
gene:Bra031587	gene:Bra031587	-	A09:35686303-35688312	DB-control	PP5_OX	OK	2.84586	3.56123	0.323513	1.32584	0.02575	0.0387164	yes
gene:Bra006996	gene:Bra006996	-	A09:26733449-26734740	DB-control	PP5_OX	OK	0.768111	0.28809	-1.4148	-1.54324	0.0257	0.0386457	yes
gene:Bra000828	gene:Bra000828	-	A03:13386800-13387576	DB-control	PP5_OX	NOTEST	0	0	0	0	1	1	no
gene:Bra000829	gene:Bra000829	-	A03:13388209-13388485	DB-control	PP5_OX	NOTEST	0	0	0	0	1	1	no
gene:Bra000830	gene:Bra000830	-	A03:13390786-13391361	DB-control	PP5_OX	OK	2.91582	1.956	-0.575996	-0.980647	0.08985	0.121294	no
gene:Bra000831	gene:Bra000831	-	A03:13394823-13396235	DB-control	PP5_OX	NOTEST	0	0	0	0	1	1	no
gene:Bra000832	gene:Bra000832	-	A03:13398209-13400028	DB-control	PP5_OX	NOTEST	0.037706	0	#NAME?	0	1	1	no
gene:Bra000833	gene:Bra000833	-	A03:13400940-13401147	DB-control	PP5_OX	NOTEST	0	0	0	0	1	1	no
gene:Bra000834	gene:Bra000834	-	A03:13404929-13406248	DB-control	PP5_OX	NOTEST	0	0	0	0	1	1	no
gene:Bra000835	gene:Bra000835	-	A03:13411922-13413340	DB-control	PP5_OX	NOTEST	0.0552906	0.0246619	-1.16475	0	1	1	no
gene:Bra000836	gene:Bra000836	-	A03:13418980-13419445	DB-control	PP5_OX	NOTEST	0	0	0	0	1	1	no
gene:Bra036298	gene:Bra036298	-	A09:398461-398896	DB-control	PP5_OX	OK	0.630298	3.15126	2.32183	2.1206	0.0257	0.0386457	yes
gene:Bra025456	gene:Bra025456	-	A04:8646790-8647531	DB-control	PP5_OX	OK	2.29357	3.24896	0.502381	1.36832	0.02565	0.0385749	yes
gene:Bra032450	gene:Bra032450	-	A09:36118231-36134743	DB-control	PP5_OX	OK	5.51473	6.67117	0.274648	1.29269	0.02565	0.0385749	yes
gene:Bra039179	gene:Bra039179	-	A05:23604459-23606542	DB-control	PP5_OX	OK	64.9904	72.2429	0.15263	1.30449	0.02565	0.0385749	yes
gene:Bra000841	gene:Bra000841	-	A03:13441925-13442335	DB-control	PP5_OX	NOTEST	0	0	0	0	1	1	no
gene:Bra028658	gene:Bra028658	-	A02:2662755-2664418	DB-control	PP5_OX	OK	8.43526	10.0029	0.245916	1.30841	0.02555	0.0384311	yes
gene:Bra000843	gene:Bra000843	-	A03:13447704-13449701	DB-control	PP5_OX	NOTEST	0	0	0	0	1	1	no
gene:Bra001757	gene:Bra001757	-	A03:18259403-18261256	DB-control	PP5_OX	OK	16.0058	17.9661	0.166677	1.28995	0.0255	0.0383581	yes
gene:Bra000845	gene:Bra000845	-	A03:13459652-13461962	DB-control	PP5_OX	NOTEST	0	0.0143056	inf	0	1	1	no
gene:Bra000846	gene:Bra000846	-	A03:13466888-13471817	DB-control	PP5_OX	OK	26.994	25.5634	-0.0785608	-0.675064	0.2399	0.291823	no
gene:Bra035859	gene:Bra035859	-	A09:3275711-3276653	DB-control	PP5_OX	OK	5.97286	4.79662	-0.316404	-1.29087	0.0255	0.0383581	yes
gene:Bra006461	gene:Bra006461	-	A03:3590483-3591701	DB-control	PP5_OX	OK	27.5764	25.3621	-0.12076	-1.26699	0.02545	0.0382873	yes
gene:Bra000849	gene:Bra000849	-	A03:13490713-13493094	DB-control	PP5_OX	OK	21.6316	21.2243	-0.0274257	-0.292795	0.61205	0.661612	no
gene:Bra000850	gene:Bra000850	-	A03:13495525-13496725	DB-control	PP5_OX	OK	30.1703	26.8809	-0.166548	-1.13566	0.051	0.0722892	no
gene:Bra000851	gene:Bra000851	-	A03:13500946-13501156	DB-control	PP5_OX	NOTEST	0	0	0	0	1	1	no
gene:Bra000852	gene:Bra000852	-	A03:13504981-13505233	DB-control	PP5_OX	NOTEST	0	0	0	0	1	1	no
gene:Bra000853	gene:Bra000853	-	A03:13509996-13512645	DB-control	PP5_OX	OK	98.0752	100.537	0.0357719	0.324715	0.57325	0.625463	no
gene:Bra029015	gene:Bra029015	-	A03:5879812-5881241	DB-control	PP5_OX	OK	0.258373	0.838245	1.69792	1.25462	0.02545	0.0382873	yes
gene:Bra000855	gene:Bra000855	-	A03:13516537-13520521	DB-control	PP5_OX	NOTEST	0	0	0	0	1	1	no
gene:Bra000856	gene:Bra000856	-	A03:13521805-13523105	DB-control	PP5_OX	NOTEST	0	0	0	0	1	1	no
gene:Bra000857	gene:Bra000857	-	A03:13524281-13526517	DB-control	PP5_OX	OK	17.2375	16.467	-0.0659724	-0.598469	0.3033	0.358402	no
gene:Bra000858	gene:Bra000858	-	A03:13531675-13532924	DB-control	PP5_OX	NOTEST	0.394253	0.0888594	-2.14953	0	1	1	no
gene:Bra000859	gene:Bra000859	-	A03:13535765-13537869	DB-control	PP5_OX	NOTEST	0.0313271	0	#NAME?	0	1	1	no
gene:Bra000860	gene:Bra000860	-	A03:13538085-13538844	DB-control	PP5_OX	NOTEST	0	0	0	0	1	1	no
gene:Bra000861	gene:Bra000861	-	A03:13540178-13541330	DB-control	PP5_OX	NOTEST	0.40091	0.0639922	-2.64731	0	1	1	no
gene:Bra000862	gene:Bra000862	-	A03:13544962-13546263	DB-control	PP5_OX	OK	7.31271	6.50584	-0.168671	-0.838598	0.1493	0.191422	no
gene:Bra029988	gene:Bra029988	-	A01:15511603-15512998	DB-control	PP5_OX	OK	1.2904	1.83183	0.505465	1.3301	0.02545	0.0382873	yes
gene:Bra034785	gene:Bra034785	-	A05:21400745-21407664	DB-control	PP5_OX	OK	12.6337	11.7176	-0.108601	-1.31563	0.02545	0.0382873	yes
gene:Bra038076	gene:Bra038076	-	A08:6721756-6722062	DB-control	PP5_OX	OK	0.923758	2.97217	1.68593	1.2301	0.02545	0.0382873	yes
gene:Bra000866	gene:Bra000866	-	A03:13581083-13583801	DB-control	PP5_OX	NOTEST	0.0251652	0	#NAME?	0	1	1	no
gene:Bra001109	gene:Bra001109	-	A03:14794463-14795036	DB-control	PP5_OX	OK	0.330694	1.05999	1.68048	1.20639	0.0254	0.038223	yes
gene:Bra022747	gene:Bra022747	-	A03:6803949-6805414	DB-control	PP5_OX	OK	3.92215	5.11964	0.384399	1.30759	0.0254	0.038223	yes
gene:Bra037129	gene:Bra037129	-	A09:4330034-4331771	DB-control	PP5_OX	OK	2.18343	1.62241	-0.428453	-1.28751	0.0254	0.038223	yes
gene:Bra000870	gene:Bra000870	-	A03:13620183-13621326	DB-control	PP5_OX	NOTEST	0	0.037756	inf	0	1	1	no
gene:Bra008621	gene:Bra008621	-	A10:13123274-13123586	DB-control	PP5_OX	OK	109.89	122.706	0.159137	1.30416	0.02535	0.0381543	yes
gene:Bra000872	gene:Bra000872	-	A03:13625699-13627623	DB-control	PP5_OX	OK	16.7124	18.3881	0.137854	0.990794	0.08815	0.11917	no
gene:Bra022395	gene:Bra022395	-	A05:17960565-17967861	DB-control	PP5_OX	OK	3.14033	2.67772	-0.229911	-1.26005	0.02535	0.0381543	yes
gene:Bra000874	gene:Bra000874	-	A03:13631840-13635860	DB-control	PP5_OX	OK	47.1156	48.2056	0.0329977	0.293026	0.60795	0.657857	no
gene:Bra025691	gene:Bra025691	-	A06:7320034-7321213	DB-control	PP5_OX	OK	8.17041	9.46109	0.211599	1.28362	0.02535	0.0381543	yes
gene:Bra028870	gene:Bra028870	-	A02:1680637-1680862	DB-control	PP5_OX	OK	24.1287	34.0698	0.497746	1.30976	0.02535	0.0381543	yes
gene:Bra017141	gene:Bra017141	-	A04:16354846-16357937	DB-control	PP5_OX	OK	0.666203	0.358939	-0.892222	-1.32637	0.0253	0.0380878	yes
gene:Bra025084	gene:Bra025084	-	A06:25068432-25070233	DB-control	PP5_OX	OK	1.50345	0.58886	-1.35228	-1.47141	0.02525	0.0380147	yes
gene:Bra025085	gene:Bra025085	-	A06:25075474-25077334	DB-control	PP5_OX	OK	11.9549	10.6238	-0.17029	-1.29487	0.02525	0.0380147	yes
gene:Bra035249	gene:Bra035249	-	A08:9579732-9583629	DB-control	PP5_OX	OK	3.36727	3.84202	0.190287	1.29885	0.02525	0.0380147	yes
gene:Bra000881	gene:Bra000881	-	A03:13677450-13679478	DB-control	PP5_OX	NOTEST	0.315423	0.421228	0.417314	0	1	1	no
gene:Bra000008	gene:Bra000008	-	A03:8809307-8810496	DB-control	PP5_OX	OK	0.791783	0.259203	-1.61102	-1.47521	0.0252	0.037946	yes
gene:Bra019456	gene:Bra019456	-	A06:13472786-13479194	DB-control	PP5_OX	OK	16.0054	14.4471	-0.147777	-1.27005	0.0252	0.037946	yes
gene:Bra025737	gene:Bra025737	-	A06:7587244-7590357	DB-control	PP5_OX	OK	14.4895	13.3332	-0.119976	-1.32817	0.0252	0.037946	yes
gene:Bra034256	gene:Bra034256	-	A04:11444050-11445088	DB-control	PP5_OX	OK	3.04659	2.14986	-0.502954	-1.41159	0.0252	0.037946	yes
gene:Bra000886	gene:Bra000886	-	A03:13713472-13714021	DB-control	PP5_OX	NOTEST	0	0	0	0	1	1	no
gene:Bra004647	gene:Bra004647	-	A05:1214149-1214869	DB-control	PP5_OX	OK	1.63366	2.524	0.627604	1.29732	0.02515	0.0378794	yes
gene:Bra000888	gene:Bra000888	-	A03:13718919-13720874	DB-control	PP5_OX	NOTEST	0.23858	0.337923	0.502218	0	1	1	no
gene:Bra002442	gene:Bra002442	-	A10:9555137-9556768	DB-control	PP5_OX	OK	3.34864	4.15901	0.312667	1.29676	0.0251	0.0378062	yes
gene:Bra000890	gene:Bra000890	-	A03:13740273-13740813	DB-control	PP5_OX	OK	1.74885	0.591125	-1.56487	-1.47107	0.03795	0.0552808	no
gene:Bra000891	gene:Bra000891	-	A03:13743272-13745906	DB-control	PP5_OX	NOTEST	0.0327092	0.0300655	-0.121586	0	1	1	no
gene:Bra000892	gene:Bra000892	-	A03:13753400-13755083	DB-control	PP5_OX	NOTEST	0	0.0456342	inf	0	1	1	no
gene:Bra021037	gene:Bra021037	-	A08:10298154-10300755	DB-control	PP5_OX	OK	4.6404	3.38112	-0.456748	-1.34789	0.0251	0.0378062	yes
gene:Bra000894	gene:Bra000894	-	A03:13762853-13766881	DB-control	PP5_OX	NOTEST	0	0	0	0	1	1	no
gene:Bra008893	gene:Bra008893	-	A10:14322394-14327709	DB-control	PP5_OX	OK	18.5375	20.4001	0.138129	1.36961	0.02505	0.0377352	yes
gene:Bra015157	gene:Bra015157	-	A07:3000473-3001568	DB-control	PP5_OX	OK	120.627	133.537	0.146696	1.30307	0.025	0.0376621	yes
gene:Bra000897	gene:Bra000897	-	A03:13781957-13785754	DB-control	PP5_OX	OK	10.6233	9.72478	-0.12749	-1.15132	0.04485	0.0643325	no
gene:Bra016664	gene:Bra016664	-	A08:19478257-19479470	DB-control	PP5_OX	OK	22.0697	25.2435	0.193848	1.30571	0.025	0.0376621	yes
gene:Bra000899	gene:Bra000899	-	A03:13803626-13804043	DB-control	PP5_OX	NOTEST	0	0.150986	inf	0	1	1	no
gene:Bra000900	gene:Bra000900	-	A03:13804681-13807274	DB-control	PP5_OX	OK	11.6419	11.4586	-0.0228972	-0.214556	0.71075	0.752293	no
gene:Bra018699	gene:Bra018699	-	A06:2542659-2544728	DB-control	PP5_OX	OK	0.275849	1.2707	2.20367	1.89718	0.025	0.0376621	yes
gene:Bra028089	gene:Bra028089	-	A09:18433382-18436288	DB-control	PP5_OX	OK	12.2992	11.0213	-0.158269	-1.31359	0.025	0.0376621	yes
gene:Bra038470	gene:Bra038470	-	A01:10995236-10996801	DB-control	PP5_OX	OK	95.4681	86.316	-0.145391	-1.30204	0.025	0.0376621	yes
gene:Bra000904	gene:Bra000904	-	A03:13829595-13831747	DB-control	PP5_OX	NOTEST	0	0	0	0	1	1	no
gene:Bra029146	gene:Bra029146	-	A03:6563146-6568659	DB-control	PP5_OX	OK	22.2079	24.1923	0.123473	1.35437	0.02495	0.0375975	yes
gene:Bra000906	gene:Bra000906	-	A03:13849864-13851268	DB-control	PP5_OX	NOTEST	0.0267657	0	#NAME?	0	1	1	no
gene:Bra000907	gene:Bra000907	-	A03:13858833-13860257	DB-control	PP5_OX	NOTEST	0	0	0	0	1	1	no
gene:Bra029488	gene:Bra029488	-	A09:17643265-17644394	DB-control	PP5_OX	OK	116.4	108.316	-0.103834	-1.27543	0.02495	0.0375975	yes
gene:Bra000909	gene:Bra000909	-	A03:13862748-13863669	DB-control	PP5_OX	OK	17.7961	18.7461	0.0750353	0.265975	0.6439	0.691288	no
gene:Bra012073	gene:Bra012073	-	A07:10186524-10187125	DB-control	PP5_OX	OK	1.37087	4.06803	1.56924	1.46957	0.0249	0.0375265	yes
gene:Bra000911	gene:Bra000911	-	A03:13865332-13867586	DB-control	PP5_OX	NOTEST	0	0	0	0	1	1	no
gene:Bra016887	gene:Bra016887	-	A04:17744436-17745808	DB-control	PP5_OX	OK	0.567117	1.26283	1.15495	1.31635	0.0249	0.0375265	yes
gene:Bra020926	gene:Bra020926	-	A08:11163487-11164906	DB-control	PP5_OX	OK	365.705	332.357	-0.137947	-1.29455	0.0248	0.0373801	yes
gene:Bra025022	gene:Bra025022	-	A06:24737802-24740512	DB-control	PP5_OX	OK	9.14668	10.3917	0.184119	1.30702	0.0248	0.0373801	yes
gene:Bra026208	gene:Bra026208	-	A06:5572562-5574348	DB-control	PP5_OX	OK	1.24484	0.524842	-1.24601	-1.55581	0.0248	0.0373801	yes
gene:Bra000916	gene:Bra000916	-	A03:13890207-13890970	DB-control	PP5_OX	OK	5.10881	5.75462	0.171733	0.424584	0.46005	0.516946	no
gene:Bra000917	gene:Bra000917	-	A03:13897297-13897615	DB-control	PP5_OX	NOTEST	0	0	0	0	1	1	no
gene:Bra006672	gene:Bra006672	-	A03:4557531-4558281	DB-control	PP5_OX	OK	0.859103	1.76304	1.03716	1.51557	0.02475	0.0373111	yes
gene:Bra000919	gene:Bra000919	-	A03:13911840-13913376	DB-control	PP5_OX	OK	16.8891	18.0755	0.0979449	0.685596	0.23515	0.286882	no
gene:Bra000920	gene:Bra000920	-	A03:13914187-13915518	DB-control	PP5_OX	OK	0.679201	0.173347	-1.97018	-1.46572	0.14915	0.191276	no
gene:Bra000921	gene:Bra000921	-	A03:13920694-13921075	DB-control	PP5_OX	OK	5.42883	3.44493	-0.656165	-1.2022	0.04395	0.063235	no
gene:Bra000922	gene:Bra000922	-	A03:13923680-13923914	DB-control	PP5_OX	NOTEST	0	0	0	0	1	1	no
gene:Bra027546	gene:Bra027546	-	A09:13437092-13447342	DB-control	PP5_OX	OK	3.62269	2.71432	-0.416473	-1.30402	0.02475	0.0373111	yes
gene:Bra000924	gene:Bra000924	-	A03:13936294-13936636	DB-control	PP5_OX	OK	1.10475	1.72873	0.645989	0.419015	0.4631	0.519928	no
gene:Bra035097	gene:Bra035097	-	A07:22154926-22155907	DB-control	PP5_OX	OK	0.402777	1.06488	1.40264	1.54919	0.02475	0.0373111	yes
gene:Bra001882	gene:Bra001882	-	A03:19120620-19121202	DB-control	PP5_OX	OK	22.7501	19.0264	-0.257872	-1.29534	0.0247	0.0372422	yes
gene:Bra024732	gene:Bra024732	-	A09:23250377-23251979	DB-control	PP5_OX	OK	16.4546	18.6018	0.176956	1.32278	0.0247	0.0372422	yes
gene:Bra025817	gene:Bra025817	-	A06:8199253-8202346	DB-control	PP5_OX	OK	12.8262	14.2825	0.155154	1.31862	0.0247	0.0372422	yes
gene:Bra000776	gene:Bra000776	-	A03:13019778-13021895	DB-control	PP5_OX	OK	1.85029	2.89533	0.645978	1.315	0.02465	0.0371732	yes
gene:Bra015738	gene:Bra015738	-	A07:21087028-21087895	DB-control	PP5_OX	OK	1.23504	0.572302	-1.10971	-1.49024	0.02465	0.0371732	yes
gene:Bra033105	gene:Bra033105	-	A02:21385527-21386296	DB-control	PP5_OX	OK	1.30581	0.397813	-1.71479	-1.69261	0.02465	0.0371732	yes
gene:Bra000932	gene:Bra000932	-	A03:13997857-13999394	DB-control	PP5_OX	OK	8.33046	8.4816	0.0259396	0.120815	0.83985	0.865664	no
gene:Bra000933	gene:Bra000933	-	A03:14000315-14004222	DB-control	PP5_OX	OK	1.4324	1.14597	-0.321865	-0.866073	0.14075	0.181434	no
gene:Bra000934	gene:Bra000934	-	A03:14007858-14008526	DB-control	PP5_OX	NOTEST	0	0	0	0	1	1	no
gene:Bra000935	gene:Bra000935	-	A03:14009041-14011436	DB-control	PP5_OX	NOTEST	0.0483951	0.0230503	-1.07007	0	1	1	no
gene:Bra000936	gene:Bra000936	-	A03:14014857-14021994	DB-control	PP5_OX	OK	6.04613	6.09993	0.0127801	0.105783	0.85455	0.878161	no
gene:Bra011272	gene:Bra011272	-	A01:2990947-2994079	DB-control	PP5_OX	OK	1.95672	2.59488	0.407233	1.3232	0.0246	0.0371042	yes
gene:Bra033651	gene:Bra033651	-	A06:25803691-25808542	DB-control	PP5_OX	OK	0.807769	0.458385	-0.817384	-1.40596	0.0246	0.0371042	yes
gene:Bra013499	gene:Bra013499	-	A01:5989184-5995755	DB-control	PP5_OX	OK	1.28544	1.53826	0.259034	1.31529	0.02455	0.037033	yes
gene:Bra019807	gene:Bra019807	-	A06:4303875-4305680	DB-control	PP5_OX	OK	72.4275	65.8566	-0.13721	-1.3614	0.02455	0.037033	yes
gene:Bra000941	gene:Bra000941	-	A03:14049740-14050231	DB-control	PP5_OX	NOTEST	0	0	0	0	1	1	no
gene:Bra022483	gene:Bra022483	-	A02:9498591-9499117	DB-control	PP5_OX	OK	8.48972	5.63683	-0.590833	-1.30066	0.02455	0.037033	yes
gene:Bra034006	gene:Bra034006	-	A02:10266327-10269678	DB-control	PP5_OX	OK	8.38495	9.58145	0.192442	1.2777	0.02455	0.037033	yes
gene:Bra000944	gene:Bra000944	-	A03:14072061-14074261	DB-control	PP5_OX	OK	26.9887	25.7083	-0.0701238	-0.689069	0.232	0.283646	no
gene:Bra038760	gene:Bra038760	-	A03:24227552-24229049	DB-control	PP5_OX	OK	3.65353	5.75332	0.655102	1.33764	0.02455	0.037033	yes
gene:Bra000946	gene:Bra000946	-	A03:14086506-14086984	DB-control	PP5_OX	OK	6.09794	4.44025	-0.457679	-0.926623	0.1071	0.142161	no
gene:Bra003766	gene:Bra003766	-	A07:14975835-14976102	DB-control	PP5_OX	OK	16.1739	22.988	0.507212	1.3485	0.0245	0.0369682	yes
gene:Bra000948	gene:Bra000948	-	A03:14090538-14092567	DB-control	PP5_OX	NOTEST	0.0317708	0.0203971	-0.639342	0	1	1	no
gene:Bra027974	gene:Bra027974	-	A09:10249857-10254113	DB-control	PP5_OX	OK	27.0725	24.3465	-0.153112	-1.30457	0.0245	0.0369682	yes
gene:Bra000818	gene:Bra000818	-	A03:13329676-13331389	DB-control	PP5_OX	OK	1.17916	0.579741	-1.02428	-1.44575	0.02445	0.036897	yes
gene:Bra000951	gene:Bra000951	-	A03:14103092-14105164	DB-control	PP5_OX	OK	0.863639	1.03267	0.257884	0.566057	0.33385	0.389749	no
gene:Bra004033	gene:Bra004033	-	A07:16421661-16422615	DB-control	PP5_OX	OK	13.7254	15.7025	0.194144	1.30423	0.02445	0.036897	yes
gene:Bra011855	gene:Bra011855	-	A01:217460-218210	DB-control	PP5_OX	OK	3.60069	4.79551	0.413412	1.34766	0.02445	0.036897	yes
gene:Bra018780	gene:Bra018780	-	A06:2021979-2022642	DB-control	PP5_OX	OK	1.06026	2.16756	1.03165	1.55162	0.02445	0.036897	yes
gene:Bra033572	gene:Bra033572	-	A06:26162971-26163978	DB-control	PP5_OX	OK	0.860686	1.47682	0.778935	1.39531	0.02445	0.036897	yes
gene:Bra000956	gene:Bra000956	-	A03:14119859-14121541	DB-control	PP5_OX	NOTEST	0.517117	0.216011	-1.25938	0	1	1	no
gene:Bra000957	gene:Bra000957	-	A03:14122636-14123971	DB-control	PP5_OX	OK	3.01262	3.48686	0.210906	0.667575	0.2534	0.305893	no
gene:Bra000958	gene:Bra000958	-	A03:14126425-14129052	DB-control	PP5_OX	OK	6.8834	6.64771	-0.0502648	-0.29567	0.608	0.657884	no
gene:Bra017107	gene:Bra017107	-	A04:16578428-16579629	DB-control	PP5_OX	OK	8.26913	10.2707	0.312728	1.31044	0.0244	0.0368321	yes
gene:Bra000960	gene:Bra000960	-	A03:14139191-14139545	DB-control	PP5_OX	OK	8.45103	7.86882	-0.102981	-0.242912	0.6762	0.721218	no
gene:Bra029953	gene:Bra029953	-	A01:15230762-15235663	DB-control	PP5_OX	OK	4.58362	3.96961	-0.20749	-1.31908	0.02435	0.0367588	yes
gene:Bra000962	gene:Bra000962	-	A03:14144791-14146959	DB-control	PP5_OX	OK	11.1499	12.2742	0.138595	1.07777	0.06235	0.0869641	no
gene:Bra000043	gene:Bra000043	-	A03:8988207-8990496	DB-control	PP5_OX	OK	3.71474	4.54516	0.291068	1.28381	0.0243	0.0366854	yes
gene:Bra000964	gene:Bra000964	-	A03:14155191-14155680	DB-control	PP5_OX	NOTEST	0	0.257053	inf	0	1	1	no
gene:Bra004095	gene:Bra004095	-	A07:16816175-16819650	DB-control	PP5_OX	OK	0.840783	1.27513	0.600835	1.27904	0.0243	0.0366854	yes
gene:Bra000966	gene:Bra000966	-	A03:14160331-14161634	DB-control	PP5_OX	OK	67.1609	65.5689	-0.0346086	-0.173071	0.7664	0.801279	no
gene:Bra000967	gene:Bra000967	-	A03:14163067-14166645	DB-control	PP5_OX	OK	15.2514	14.9911	-0.0248344	-0.253035	0.66135	0.707448	no
gene:Bra000968	gene:Bra000968	-	A03:14167486-14168428	DB-control	PP5_OX	OK	12.369	10.507	-0.235376	-0.763977	0.19075	0.237808	no
gene:Bra040230	gene:Bra040230	-	A01:28239623-28240751	DB-control	PP5_OX	OK	1.81664	2.56665	0.498618	1.33666	0.0243	0.0366854	yes
gene:Bra000970	gene:Bra000970	-	A03:14178723-14182754	DB-control	PP5_OX	OK	1.79784	2.21957	0.304015	1.15832	0.0429	0.0618633	no
gene:Bra000971	gene:Bra000971	-	A03:14185128-14186999	DB-control	PP5_OX	OK	1.62886	1.29655	-0.329186	-0.886662	0.1165	0.153275	no
gene:Bra009594	gene:Bra009594	-	A10:17366898-17369706	DB-control	PP5_OX	OK	0.386168	0.597819	0.630478	1.32296	0.02425	0.0366162	yes
gene:Bra020316	gene:Bra020316	-	A02:6178667-6179477	DB-control	PP5_OX	OK	7.83503	6.14415	-0.350726	-1.32664	0.02425	0.0366162	yes
gene:Bra000974	gene:Bra000974	-	A03:14215365-14216625	DB-control	PP5_OX	OK	187.825	185.821	-0.0154757	-0.139702	0.8101	0.840011	no
gene:Bra000975	gene:Bra000975	-	A03:14217662-14218782	DB-control	PP5_OX	NOTEST	0	0	0	0	1	1	no
gene:Bra025125	gene:Bra025125	-	A06:23329983-23330845	DB-control	PP5_OX	OK	12.0077	14.3426	0.256338	1.32298	0.02425	0.0366162	yes
gene:Bra030973	gene:Bra030973	-	A08:1255136-1257352	DB-control	PP5_OX	OK	3.75581	5.03548	0.423006	1.3057	0.0242	0.0365471	yes
gene:Bra004648	gene:Bra004648	-	A05:1215318-1218169	DB-control	PP5_OX	OK	3.67797	4.2883	0.221496	1.29307	0.02415	0.0364736	yes
gene:Bra000979	gene:Bra000979	-	A03:14239553-14240111	DB-control	PP5_OX	NOTEST	0	0	0	0	1	1	no
gene:Bra000980	gene:Bra000980	-	A03:14268953-14269367	DB-control	PP5_OX	OK	0.745487	0.537251	-0.472586	-0.307948	0.57295	0.625266	no
gene:Bra014222	gene:Bra014222	-	A08:2403955-2406983	DB-control	PP5_OX	OK	3.74077	3.21648	-0.217853	-1.32033	0.02415	0.0364736	yes
gene:Bra000982	gene:Bra000982	-	A03:14273457-14273809	DB-control	PP5_OX	NOTEST	0	0	0	0	1	1	no
gene:Bra000983	gene:Bra000983	-	A03:14274190-14275624	DB-control	PP5_OX	OK	2.31309	2.36396	0.0313814	0.112578	0.8433	0.86881	no
gene:Bra000984	gene:Bra000984	-	A03:14276544-14277952	DB-control	PP5_OX	OK	7.92629	7.33971	-0.110923	-0.436401	0.44575	0.502792	no
gene:Bra035495	gene:Bra035495	-	A08:7823119-7826456	DB-control	PP5_OX	OK	1.60758	3.07364	0.935056	1.4255	0.02415	0.0364736	yes
gene:Bra037985	gene:Bra037985	-	A06:289219-289780	DB-control	PP5_OX	OK	1.93629	0.929643	-1.05854	-1.36819	0.02415	0.0364736	yes
gene:Bra001284	gene:Bra001284	-	A03:15675152-15676383	DB-control	PP5_OX	OK	0.76348	0.34211	-1.15813	-1.35635	0.0241	0.0364065	yes
gene:Bra000988	gene:Bra000988	-	A03:14286770-14288016	DB-control	PP5_OX	OK	17.1527	17.4791	0.0271958	0.174435	0.76685	0.801706	no
gene:Bra000989	gene:Bra000989	-	A03:14288382-14289728	DB-control	PP5_OX	OK	28.0692	28.226	0.00803567	0.0546657	0.9171	0.931179	no
gene:Bra002698	gene:Bra002698	-	A10:8185097-8187134	DB-control	PP5_OX	OK	0.613526	0.131157	-2.22583	-1.74385	0.0241	0.0364065	yes
gene:Bra000991	gene:Bra000991	-	A03:14295021-14295399	DB-control	PP5_OX	OK	60.2305	56.6591	-0.0881872	-0.601603	0.2989	0.353887	no
gene:Bra000992	gene:Bra000992	-	A03:14296469-14296742	DB-control	PP5_OX	NOTEST	0	0	0	0	1	1	no
gene:Bra027549	gene:Bra027549	-	A09:13410225-13412514	DB-control	PP5_OX	OK	4.25532	3.44724	-0.303826	-1.29917	0.0241	0.0364065	yes
gene:Bra000994	gene:Bra000994	-	A03:14301924-14303833	DB-control	PP5_OX	OK	3.00152	2.47947	-0.275663	-0.863742	0.1427	0.18374	no
gene:Bra000995	gene:Bra000995	-	A03:14304242-14304653	DB-control	PP5_OX	OK	0.348767	1.08444	1.63662	0.854819	0.1009	0.134619	no
gene:Bra033799	gene:Bra033799	-	A01:14075756-14076793	DB-control	PP5_OX	OK	16.2219	12.2901	-0.40045	-1.31145	0.0241	0.0364065	yes
gene:Bra022774	gene:Bra022774	-	A03:6985000-6985906	DB-control	PP5_OX	OK	71.4211	79.4866	0.154362	1.2985	0.02405	0.0363393	yes
gene:Bra032352	gene:Bra032352	-	A09:22333112-22335239	DB-control	PP5_OX	OK	3.21308	2.66273	-0.271048	-1.30839	0.02405	0.0363393	yes
gene:Bra007251	gene:Bra007251	-	A09:28205065-28207367	DB-control	PP5_OX	OK	1.25556	0.896022	-0.486723	-1.3567	0.024	0.036268	yes
gene:Bra038839	gene:Bra038839	-	A07:1131032-1133611	DB-control	PP5_OX	OK	2.44507	2.93423	0.263104	1.30408	0.024	0.036268	yes
gene:Bra001001	gene:Bra001001	-	A03:14326267-14328196	DB-control	PP5_OX	OK	0.938279	0.866413	-0.114962	-0.288713	0.6084	0.658235	no
gene:Bra001002	gene:Bra001002	-	A03:14328725-14329400	DB-control	PP5_OX	OK	1.67173	1.50021	-0.156172	-0.245804	0.66365	0.709475	no
gene:Bra004335	gene:Bra004335	-	A07:18069480-18069711	DB-control	PP5_OX	OK	0	1.99794	inf	#NAME?	0.02395	0.0361966	yes
gene:Bra009535	gene:Bra009535	-	A10:17135192-17135516	DB-control	PP5_OX	OK	0	0.628989	inf	#NAME?	0.02395	0.0361966	yes
gene:Bra001005	gene:Bra001005	-	A03:14345017-14345921	DB-control	PP5_OX	NOTEST	0.10017	0.185345	0.887772	0	1	1	no
gene:Bra013670	gene:Bra013670	-	A01:6997746-7003556	DB-control	PP5_OX	OK	0.734732	0.363047	-1.01706	-1.47053	0.02395	0.0361966	yes
gene:Bra001007	gene:Bra001007	-	A03:14358211-14358812	DB-control	PP5_OX	OK	18.3795	23.8551	0.376199	1.06857	0.06385	0.088891	no
gene:Bra021256	gene:Bra021256	-	A01:22996623-22996872	DB-control	PP5_OX	OK	0	1.3426	inf	#NAME?	0.02395	0.0361966	yes
gene:Bra030637	gene:Bra030637	-	A08:20987585-20989031	DB-control	PP5_OX	OK	9.92381	8.55521	-0.214091	-1.30282	0.0239	0.0361293	yes
gene:Bra001010	gene:Bra001010	-	A03:14381658-14383192	DB-control	PP5_OX	OK	124.324	117.463	-0.0819051	-0.717442	0.2102	0.259567	no
gene:Bra001011	gene:Bra001011	-	A03:14384191-14386158	DB-control	PP5_OX	NOTEST	0	0.0887989	inf	0	1	1	no
gene:Bra001012	gene:Bra001012	-	A03:14387358-14389731	DB-control	PP5_OX	NOTEST	0.307501	0.318112	0.0489434	0	1	1	no
gene:Bra001013	gene:Bra001013	-	A03:14390360-14390747	DB-control	PP5_OX	NOTEST	0	0.300631	inf	0	1	1	no
gene:Bra001014	gene:Bra001014	-	A03:14394316-14394916	DB-control	PP5_OX	NOTEST	0	0	0	0	1	1	no
gene:Bra001015	gene:Bra001015	-	A03:14395827-14396208	DB-control	PP5_OX	NOTEST	0	0.0979844	inf	0	1	1	no
gene:Bra001016	gene:Bra001016	-	A03:14396566-14397207	DB-control	PP5_OX	NOTEST	0	0	0	0	1	1	no
gene:Bra005297	gene:Bra005297	-	A05:4613780-4614966	DB-control	PP5_OX	OK	39.2624	44.2394	0.172182	1.32658	0.02385	0.0360558	yes
gene:Bra001018	gene:Bra001018	-	A03:14399804-14400246	DB-control	PP5_OX	NOTEST	0	0	0	0	1	1	no
gene:Bra001019	gene:Bra001019	-	A03:14400638-14401378	DB-control	PP5_OX	OK	46.222	44.4437	-0.0566022	-0.0929746	0.85675	0.879837	no
gene:Bra013367	gene:Bra013367	-	A01:5233988-5236109	DB-control	PP5_OX	OK	0.329603	0.880028	1.41682	1.65385	0.02385	0.0360558	yes
gene:Bra024194	gene:Bra024194	-	A03:26967437-26973023	DB-control	PP5_OX	OK	0.767956	0.230872	-1.73393	-1.64541	0.02385	0.0360558	yes
gene:Bra039809	gene:Bra039809	-	A04:3743461-3744067	DB-control	PP5_OX	OK	27.9491	31.6549	0.179624	1.33929	0.02385	0.0360558	yes
gene:Bra023575	gene:Bra023575	-	A02:4001627-4003754	DB-control	PP5_OX	OK	72.684	65.8231	-0.143044	-1.28864	0.0238	0.0359885	yes
gene:Bra036136	gene:Bra036136	-	A09:2559389-2559992	DB-control	PP5_OX	OK	2.20817	1.0711	-1.04376	-1.49723	0.0238	0.0359885	yes
gene:Bra001025	gene:Bra001025	-	A03:14433902-14436356	DB-control	PP5_OX	OK	4.13382	3.9097	-0.0804188	-0.380501	0.513	0.568058	no
gene:Bra001026	gene:Bra001026	-	A03:14437358-14438315	DB-control	PP5_OX	NOTEST	0	0.166084	inf	0	1	1	no
gene:Bra001027	gene:Bra001027	-	A03:14438827-14440888	DB-control	PP5_OX	NOTEST	0.0819362	0.0801037	-0.0326326	0	1	1	no
gene:Bra017192	gene:Bra017192	-	A04:16103814-16109183	DB-control	PP5_OX	OK	0.720374	1.00286	0.477305	1.34882	0.02375	0.035917	yes
gene:Bra001029	gene:Bra001029	-	A03:14443446-14444505	DB-control	PP5_OX	NOTEST	0	0	0	0	1	1	no
gene:Bra001030	gene:Bra001030	-	A03:14448446-14449592	DB-control	PP5_OX	OK	6.87547	6.56289	-0.0671277	-0.338821	0.5568	0.609745	no
gene:Bra037789	gene:Bra037789	-	A09:3578715-3579319	DB-control	PP5_OX	OK	43.7279	35.7129	-0.292108	-1.30773	0.02375	0.035917	yes
gene:Bra013169	gene:Bra013169	-	A03:20079359-20083047	DB-control	PP5_OX	OK	21.7552	20.0869	-0.11511	-1.32244	0.0237	0.0358456	yes
gene:Bra029875	gene:Bra029875	-	A05:21905770-21906884	DB-control	PP5_OX	OK	2.11057	3.05206	0.532155	1.34739	0.0237	0.0358456	yes
gene:Bra036018	gene:Bra036018	-	Scaffold000111:594889-597164	DB-control	PP5_OX	OK	28.0691	31.0813	0.147061	1.29266	0.0237	0.0358456	yes
gene:Bra038628	gene:Bra038628	-	A06:14259593-14261269	DB-control	PP5_OX	OK	103.651	93.1339	-0.154362	-1.30948	0.0237	0.0358456	yes
gene:Bra008790	gene:Bra008790	-	A10:13844614-13845950	DB-control	PP5_OX	OK	19.8084	21.7487	0.13482	1.36615	0.02365	0.0357782	yes
gene:Bra017152	gene:Bra017152	-	A04:16301259-16302012	DB-control	PP5_OX	OK	1.0144	0.246614	-2.04031	-1.59436	0.02365	0.0357782	yes
gene:Bra001038	gene:Bra001038	-	A03:14485044-14487189	DB-control	PP5_OX	OK	3.58797	3.3731	-0.0890934	-0.388346	0.50025	0.55605	no
gene:Bra001039	gene:Bra001039	-	A03:14491469-14494853	DB-control	PP5_OX	OK	13.1269	12.0588	-0.122442	-1.12841	0.05035	0.0714412	no
gene:Bra001041	gene:Bra001041	-	A03:14499252-14501031	DB-control	PP5_OX	NOTEST	0	0	0	0	1	1	no
gene:Bra001042	gene:Bra001042	-	A03:14507219-14508251	DB-control	PP5_OX	NOTEST	0	0	0	0	1	1	no
gene:Bra001043	gene:Bra001043	-	A03:14509277-14510060	DB-control	PP5_OX	NOTEST	0.0442031	0	#NAME?	0	1	1	no
gene:Bra001044	gene:Bra001044	-	A03:14511126-14512605	DB-control	PP5_OX	NOTEST	0.280727	0.213247	-0.396639	0	1	1	no
gene:Bra001045	gene:Bra001045	-	A03:14513497-14515436	DB-control	PP5_OX	OK	7.69433	7.93179	0.0438501	0.232193	0.68615	0.730199	no
gene:Bra032869	gene:Bra032869	-	A09:12278417-12279526	DB-control	PP5_OX	OK	22.7724	18.8128	-0.27557	-1.32204	0.0236	0.0357066	yes
gene:Bra001079	gene:Bra001079	-	A03:14624604-14625903	DB-control	PP5_OX	OK	20.1416	22.9248	0.186732	1.33974	0.02355	0.035633	yes
gene:Bra001048	gene:Bra001048	-	A03:14530120-14532761	DB-control	PP5_OX	NOTEST	0	0	0	0	1	1	no
gene:Bra003831	gene:Bra003831	-	A07:15255579-15257410	DB-control	PP5_OX	OK	6.2964	5.43973	-0.210993	-1.30672	0.02355	0.035633	yes
gene:Bra025314	gene:Bra025314	-	A06:22238733-22239579	DB-control	PP5_OX	OK	2.71988	3.71369	0.449309	1.29949	0.02355	0.035633	yes
gene:Bra001051	gene:Bra001051	-	A03:14540842-14541768	DB-control	PP5_OX	NOTEST	0	0	0	0	1	1	no
gene:Bra028866	gene:Bra028866	-	A02:1695191-1696010	DB-control	PP5_OX	OK	0.227749	1.12274	2.30151	1.81309	0.02355	0.035633	yes
gene:Bra001053	gene:Bra001053	-	A03:14545462-14546479	DB-control	PP5_OX	NOTEST	0.067166	0.0736516	0.132987	0	1	1	no
gene:Bra001054	gene:Bra001054	-	A03:14547037-14548117	DB-control	PP5_OX	NOTEST	0.13197	0.278121	1.0755	0	1	1	no
gene:Bra001055	gene:Bra001055	-	A03:14548773-14550169	DB-control	PP5_OX	NOTEST	0.427353	0.521322	0.286745	0	1	1	no
gene:Bra001056	gene:Bra001056	-	A03:14552255-14553826	DB-control	PP5_OX	OK	3.46976	3.54761	0.032008	0.0989355	0.86955	0.890873	no
gene:Bra011108	gene:Bra011108	-	A01:3843376-3844229	DB-control	PP5_OX	OK	15.3686	12.3583	-0.314509	-1.33895	0.0235	0.0355656	yes
gene:Bra000151	gene:Bra000151	-	A03:9572510-9574396	DB-control	PP5_OX	OK	14.5849	16.8445	0.207806	1.31514	0.02345	0.035492	yes
gene:Bra001059	gene:Bra001059	-	A03:14558723-14561241	DB-control	PP5_OX	OK	8.32853	7.72365	-0.108779	-0.73225	0.2065	0.255467	no
gene:Bra001060	gene:Bra001060	-	A03:14562058-14563978	DB-control	PP5_OX	OK	8.53751	7.49207	-0.188451	-1.20909	0.0378	0.0550806	no
gene:Bra021784	gene:Bra021784	-	A04:14445333-14446503	DB-control	PP5_OX	OK	1.06078	0.618719	-0.777762	-1.36823	0.02345	0.035492	yes
gene:Bra030778	gene:Bra030778	-	A08:20400427-20403025	DB-control	PP5_OX	OK	16.792	15.6141	-0.104927	-1.32302	0.02345	0.035492	yes
gene:Bra005508	gene:Bra005508	-	A05:5877328-5878444	DB-control	PP5_OX	OK	13.9587	11.8986	-0.23037	-1.32531	0.0234	0.0354224	yes
gene:Bra010002	gene:Bra010002	-	A06:18576711-18578656	DB-control	PP5_OX	OK	13.0176	10.6291	-0.29244	-1.30574	0.0234	0.0354224	yes
gene:Bra001065	gene:Bra001065	-	A03:14576719-14578940	DB-control	PP5_OX	NOTEST	0	0.0203897	inf	0	1	1	no
gene:Bra016162	gene:Bra016162	-	A07:19111916-19112635	DB-control	PP5_OX	OK	3.63883	2.17903	-0.73979	-1.37027	0.0234	0.0354224	yes
gene:Bra036016	gene:Bra036016	-	Scaffold000111:588114-588696	DB-control	PP5_OX	OK	1.64142	2.77506	0.757577	1.38544	0.02335	0.0353528	yes
gene:Bra040928	gene:Bra040928	-	Scaffold000317:7657-8617	DB-control	PP5_OX	OK	39.8232	42.8365	0.105231	1.4911	0.02335	0.0353528	yes
gene:Bra001069	gene:Bra001069	-	A03:14590819-14595342	DB-control	PP5_OX	NOTEST	0	0	0	0	1	1	no
gene:Bra001070	gene:Bra001070	-	A03:14596757-14597856	DB-control	PP5_OX	NOTEST	0.11202	0.107882	-0.0542967	0	1	1	no
gene:Bra001071	gene:Bra001071	-	A03:14600480-14602412	DB-control	PP5_OX	OK	1.30087	0.913494	-0.510004	-1.18155	0.0416	0.0601571	no
gene:Bra001072	gene:Bra001072	-	A03:14606947-14610037	DB-control	PP5_OX	NOTEST	0.146637	0.153095	0.0621774	0	1	1	no
gene:Bra008220	gene:Bra008220	-	A02:13886418-13887649	DB-control	PP5_OX	OK	12.6524	14.5981	0.206363	1.33724	0.0233	0.0352812	yes
gene:Bra001074	gene:Bra001074	-	A03:14614389-14614782	DB-control	PP5_OX	OK	2.25895	1.80091	-0.326926	-0.389716	0.51075	0.565853	no
gene:Bra001075	gene:Bra001075	-	A03:14616104-14616784	DB-control	PP5_OX	NOTEST	0	0	0	0	1	1	no
gene:Bra001076	gene:Bra001076	-	A03:14619129-14619486	DB-control	PP5_OX	NOTEST	0	0	0	0	1	1	no
gene:Bra001077	gene:Bra001077	-	A03:14619971-14620223	DB-control	PP5_OX	NOTEST	0	0	0	0	1	1	no
gene:Bra017427	gene:Bra017427	-	A09:15231267-15233547	DB-control	PP5_OX	OK	22.6604	20.918	-0.115427	-1.31703	0.0233	0.0352812	yes
gene:Bra017430	gene:Bra017430	-	A09:15251530-15257302	DB-control	PP5_OX	OK	12.2318	13.1373	0.103026	1.28918	0.0233	0.0352812	yes
gene:Bra024989	gene:Bra024989	-	A06:24553689-24554978	DB-control	PP5_OX	OK	25.9457	28.9439	0.157765	1.32886	0.0233	0.0352812	yes
gene:Bra001081	gene:Bra001081	-	A03:14629061-14630609	DB-control	PP5_OX	NOTEST	0	0	0	0	1	1	no
gene:Bra001082	gene:Bra001082	-	A03:14635011-14638106	DB-control	PP5_OX	OK	4.18075	4.69521	0.167427	0.742139	0.1976	0.245544	no
gene:Bra029575	gene:Bra029575	-	A09:16926295-16927057	DB-control	PP5_OX	OK	24.7288	21.9397	-0.172649	-1.31929	0.0233	0.0352812	yes
gene:Bra001084	gene:Bra001084	-	A03:14645783-14647975	DB-control	PP5_OX	NOTEST	0.320668	0.182871	-0.810249	0	1	1	no
gene:Bra010418	gene:Bra010418	-	A08:14430149-14432710	DB-control	PP5_OX	OK	68.176	75.625	0.149599	1.30218	0.02325	0.0352156	yes
gene:Bra028155	gene:Bra028155	-	A04:6224871-6227499	DB-control	PP5_OX	OK	51.1143	54.8382	0.101454	1.29723	0.02325	0.0352156	yes
gene:Bra001087	gene:Bra001087	-	A03:14672897-14673260	DB-control	PP5_OX	OK	0.203969	0.840107	2.04222	1.02784	0.2903	0.34484	no
gene:Bra001088	gene:Bra001088	-	A03:14674237-14674525	DB-control	PP5_OX	OK	0.590873	0.882462	0.578686	0.313831	0.6291	0.677727	no
gene:Bra001089	gene:Bra001089	-	A03:14674774-14677803	DB-control	PP5_OX	OK	8.38425	8.91885	0.0891763	0.76883	0.187	0.233777	no
gene:Bra005640	gene:Bra005640	-	A05:6690821-6694322	DB-control	PP5_OX	OK	12.7907	14.2927	0.160175	1.30016	0.0232	0.035144	yes
gene:Bra030692	gene:Bra030692	-	A08:20781036-20787027	DB-control	PP5_OX	OK	0.67148	0.248806	-1.43232	-1.68402	0.0232	0.035144	yes
gene:Bra001092	gene:Bra001092	-	A03:14701769-14703230	DB-control	PP5_OX	OK	5.72642	6.70159	0.226871	0.929558	0.11445	0.150842	no
gene:Bra037011	gene:Bra037011	-	A03:28972521-28974290	DB-control	PP5_OX	OK	3.10874	2.39553	-0.375983	-1.31497	0.0232	0.035144	yes
gene:Bra012896	gene:Bra012896	-	A03:21650497-21654247	DB-control	PP5_OX	OK	1.12003	0.52286	-1.09903	-1.59597	0.02315	0.0350743	yes
gene:Bra001095	gene:Bra001095	-	A03:14712258-14713912	DB-control	PP5_OX	NOTEST	0.0174537	0.0155272	-0.168741	0	1	1	no
gene:Bra027384	gene:Bra027384	-	A05:20636809-20638358	DB-control	PP5_OX	OK	3.04779	3.94448	0.372071	1.34013	0.0231	0.0350006	yes
gene:Bra001097	gene:Bra001097	-	A03:14741172-14742064	DB-control	PP5_OX	NOTEST	0	0	0	0	1	1	no
gene:Bra028512	gene:Bra028512	-	A02:805127-807860	DB-control	PP5_OX	OK	3.41183	2.63638	-0.371987	-1.34185	0.0231	0.0350006	yes
gene:Bra001099	gene:Bra001099	-	A03:14745109-14745647	DB-control	PP5_OX	NOTEST	0	0	0	0	1	1	no
gene:Bra005041	gene:Bra005041	-	A05:3117407-3119089	DB-control	PP5_OX	OK	11.0384	8.96693	-0.299846	-1.33633	0.02305	0.0349288	yes
gene:Bra001101	gene:Bra001101	-	A03:14754886-14755249	DB-control	PP5_OX	NOTEST	0.769881	0.18044	-2.09312	0	1	1	no
gene:Bra014813	gene:Bra014813	-	A04:3334806-3337221	DB-control	PP5_OX	OK	4.76092	6.0517	0.346101	1.33055	0.02305	0.0349288	yes
gene:Bra001103	gene:Bra001103	-	A03:14757389-14758583	DB-control	PP5_OX	NOTEST	0.0785266	0.0153137	-2.35836	0	1	1	no
gene:Bra035251	gene:Bra035251	-	A08:9597372-9599248	DB-control	PP5_OX	OK	36.9574	34.3031	-0.107525	-1.30305	0.023	0.0348571	yes
gene:Bra001105	gene:Bra001105	-	A03:14768347-14771046	DB-control	PP5_OX	OK	4.00926	4.39503	0.132537	0.487425	0.3908	0.447637	no
gene:Bra035719	gene:Bra035719	-	A04:12551413-12552819	DB-control	PP5_OX	OK	2.64243	1.9505	-0.438021	-1.36654	0.023	0.0348571	yes
gene:Bra001107	gene:Bra001107	-	A03:14782020-14782458	DB-control	PP5_OX	NOTEST	0	0	0	0	1	1	no
gene:Bra001108	gene:Bra001108	-	A03:14786842-14788155	DB-control	PP5_OX	NOTEST	0	0	0	0	1	1	no
gene:Bra015105	gene:Bra015105	-	A07:3463345-3465497	DB-control	PP5_OX	OK	12.9939	14.5001	0.158229	1.323	0.0229	0.0347095	yes
gene:Bra001110	gene:Bra001110	-	A03:14804113-14805064	DB-control	PP5_OX	OK	0.94913	0.725623	-0.387385	-0.359539	0.4877	0.543688	no
gene:Bra001111	gene:Bra001111	-	A03:14806598-14809478	DB-control	PP5_OX	OK	37.3779	36.5999	-0.0303448	-0.363525	0.5241	0.578982	no
gene:Bra001112	gene:Bra001112	-	A03:14809997-14812612	DB-control	PP5_OX	OK	1.11968	1.34249	0.261824	0.720241	0.2247	0.275503	no
gene:Bra001113	gene:Bra001113	-	A03:14817137-14824935	DB-control	PP5_OX	NOTEST	0.408632	0.237523	-0.782733	0	1	1	no
gene:Bra022795	gene:Bra022795	-	A03:7087838-7089351	DB-control	PP5_OX	OK	2.41918	1.04147	-1.2159	-1.44558	0.0229	0.0347095	yes
gene:Bra001115	gene:Bra001115	-	A03:14832978-14833994	DB-control	PP5_OX	NOTEST	0	0	0	0	1	1	no
gene:Bra035090	gene:Bra035090	-	A07:22113564-22115256	DB-control	PP5_OX	OK	9.194	10.3238	0.167205	1.30188	0.0229	0.0347095	yes
gene:Bra001117	gene:Bra001117	-	A03:14837728-14838829	DB-control	PP5_OX	OK	9.91803	9.47021	-0.0666569	-0.368215	0.52175	0.57675	no
gene:Bra001118	gene:Bra001118	-	A03:14841498-14843863	DB-control	PP5_OX	OK	11.6971	12.2018	0.0609332	0.4494	0.441	0.498184	no
gene:Bra001119	gene:Bra001119	-	A03:14845616-14846692	DB-control	PP5_OX	NOTEST	0	0	0	0	1	1	no
gene:Bra001120	gene:Bra001120	-	A03:14847247-14850091	DB-control	PP5_OX	OK	9.97054	10.1262	0.0223429	0.156507	0.78505	0.817588	no
gene:Bra005353	gene:Bra005353	-	A05:4979991-4980288	DB-control	PP5_OX	OK	0.783482	0	#NAME?	#NAME?	0.02285	0.0346398	yes
gene:Bra007201	gene:Bra007201	-	A09:27930625-27933269	DB-control	PP5_OX	OK	1.9569	2.50595	0.356787	1.31796	0.02285	0.0346398	yes
gene:Bra015950	gene:Bra015950	-	A07:20094832-20095150	DB-control	PP5_OX	OK	0.597893	0	#NAME?	#NAME?	0.02285	0.0346398	yes
gene:Bra017433	gene:Bra017433	-	A09:15310557-15311200	DB-control	PP5_OX	OK	5.58966	7.92469	0.503595	1.3253	0.02285	0.0346398	yes
gene:Bra001125	gene:Bra001125	-	A03:14868660-14872595	DB-control	PP5_OX	OK	5.88114	5.94202	0.0148587	0.100078	0.86395	0.886018	no
gene:Bra027003	gene:Bra027003	-	A09:7482044-7482245	DB-control	PP5_OX	OK	2.09121	0	#NAME?	#NAME?	0.02285	0.0346398	yes
gene:Bra037901	gene:Bra037901	-	A09:11456862-11457616	DB-control	PP5_OX	OK	0.642218	0	#NAME?	#NAME?	0.02285	0.0346398	yes
gene:Bra001128	gene:Bra001128	-	A03:14879605-14881982	DB-control	PP5_OX	NOTEST	0.317977	0.24234	-0.39189	0	1	1	no
gene:Bra006379	gene:Bra006379	-	A03:3264886-3265297	DB-control	PP5_OX	OK	4.77202	7.20507	0.594412	1.37688	0.0228	0.0345759	yes
gene:Bra001130	gene:Bra001130	-	A03:14898036-14905742	DB-control	PP5_OX	NOTEST	0	0	0	0	1	1	no
gene:Bra024730	gene:Bra024730	-	A09:23266676-23272287	DB-control	PP5_OX	OK	0.633912	0.438275	-0.532448	-1.34762	0.02275	0.0345021	yes
gene:Bra001132	gene:Bra001132	-	A03:14909189-14910686	DB-control	PP5_OX	OK	3.51791	4.47615	0.34754	1.10692	0.064	0.0890857	no
gene:Bra019045	gene:Bra019045	-	A03:26572878-26575086	DB-control	PP5_OX	OK	106.41	117.329	0.140925	1.33998	0.02265	0.0343524	yes
gene:Bra003665	gene:Bra003665	-	A07:14344933-14346656	DB-control	PP5_OX	OK	4.36917	3.62014	-0.271313	-1.32711	0.0226	0.0342786	yes
gene:Bra001135	gene:Bra001135	-	A03:14917320-14918395	DB-control	PP5_OX	NOTEST	0.510788	0.115233	-2.14818	0	1	1	no
gene:Bra021592	gene:Bra021592	-	A01:24312050-24313596	DB-control	PP5_OX	OK	1.12506	0.485621	-1.2121	-1.63525	0.0226	0.0342786	yes
gene:Bra001137	gene:Bra001137	-	A03:14924373-14926073	DB-control	PP5_OX	OK	17.689	18.472	0.0624879	0.470484	0.4194	0.476447	no
gene:Bra001138	gene:Bra001138	-	A03:14926747-14928633	DB-control	PP5_OX	NOTEST	0.0238001	0	#NAME?	0	1	1	no
gene:Bra001139	gene:Bra001139	-	A03:14931615-14932747	DB-control	PP5_OX	OK	8.08041	6.9421	-0.219056	-1.17998	0.04475	0.0642101	no
gene:Bra034125	gene:Bra034125	-	A01:27325085-27327487	DB-control	PP5_OX	OK	12.1451	10.7833	-0.171574	-1.30962	0.0226	0.0342786	yes
gene:Bra001141	gene:Bra001141	-	A03:14948972-14950013	DB-control	PP5_OX	OK	1.49293	2.42841	0.701861	1.01773	0.068	0.0941544	no
gene:Bra001142	gene:Bra001142	-	A03:14950786-14951956	DB-control	PP5_OX	NOTEST	0	0	0	0	1	1	no
gene:Bra001913	gene:Bra001913	-	A03:19320364-19320724	DB-control	PP5_OX	OK	5.04943	7.76292	0.620479	1.32857	0.02255	0.0342087	yes
gene:Bra002727	gene:Bra002727	-	A10:7983167-7985090	DB-control	PP5_OX	OK	5.33353	6.14335	0.203934	1.32083	0.02255	0.0342087	yes
gene:Bra035759	gene:Bra035759	-	A05:16996151-16998566	DB-control	PP5_OX	OK	10.9216	9.40379	-0.215868	-1.33192	0.02255	0.0342087	yes
gene:Bra001146	gene:Bra001146	-	A03:14968425-14971254	DB-control	PP5_OX	NOTEST	0	0	0	0	1	1	no
gene:Bra000286	gene:Bra000286	-	A03:10343527-10345953	DB-control	PP5_OX	OK	1.48379	1.08721	-0.448652	-1.36951	0.0225	0.0341387	yes
gene:Bra001148	gene:Bra001148	-	A03:14976354-14979096	DB-control	PP5_OX	OK	1.42112	1.16046	-0.292324	-1.02059	0.0787	0.107608	no
gene:Bra001713	gene:Bra001713	-	A03:18008430-18011485	DB-control	PP5_OX	OK	13.5063	14.8413	0.135987	1.31552	0.0225	0.0341387	yes
gene:Bra013921	gene:Bra013921	-	A01:8453332-8455677	DB-control	PP5_OX	OK	4.24683	5.01193	0.238981	1.33108	0.0225	0.0341387	yes
gene:Bra001151	gene:Bra001151	-	A03:14994434-14996419	DB-control	PP5_OX	OK	23.2197	24.4093	0.0720781	0.63146	0.27675	0.330705	no
gene:Bra001152	gene:Bra001152	-	A03:14997508-14999763	DB-control	PP5_OX	OK	48.5104	51.2471	0.0791745	0.674882	0.2491	0.301492	no
gene:Bra001153	gene:Bra001153	-	A03:15000727-15002990	DB-control	PP5_OX	OK	16.6458	17.9795	0.111201	0.942565	0.1028	0.136896	no
gene:Bra018615	gene:Bra018615	-	A06:2956660-2958052	DB-control	PP5_OX	OK	29.8566	27.2007	-0.134408	-1.37651	0.0225	0.0341387	yes
gene:Bra028629	gene:Bra028629	-	A02:1370514-1372375	DB-control	PP5_OX	OK	0.714224	1.22981	0.78399	1.38617	0.0225	0.0341387	yes
gene:Bra030082	gene:Bra030082	-	A07:6711860-6712595	DB-control	PP5_OX	OK	124.764	138.559	0.151299	1.31986	0.0225	0.0341387	yes
gene:Bra001157	gene:Bra001157	-	A03:15010194-15011697	DB-control	PP5_OX	NOTEST	0	0.0444828	inf	0	1	1	no
gene:Bra035588	gene:Bra035588	-	A02:7405095-7406535	DB-control	PP5_OX	OK	0.196474	0.658197	1.74418	1.65474	0.0225	0.0341387	yes
gene:Bra037595	gene:Bra037595	-	A01:22177378-22177603	DB-control	PP5_OX	OK	1.01071	4.48834	2.15082	1.66336	0.0225	0.0341387	yes
gene:Bra024674	gene:Bra024674	-	A09:23638327-23639717	DB-control	PP5_OX	OK	6.26763	7.98603	0.349558	1.33884	0.02245	0.0340786	yes
gene:Bra028748	gene:Bra028748	-	A02:2246731-2248712	DB-control	PP5_OX	OK	23.3936	20.8948	-0.162972	-1.3259	0.0224	0.0340047	yes
gene:Bra016608	gene:Bra016608	-	A08:19271148-19272978	DB-control	PP5_OX	OK	25.8055	29.284	0.182435	1.32736	0.02235	0.0339308	yes
gene:Bra017691	gene:Bra017691	-	A03:29800009-29800800	DB-control	PP5_OX	OK	0.595751	1.38105	1.21298	1.58889	0.02235	0.0339308	yes
gene:Bra001164	gene:Bra001164	-	A03:15056403-15057733	DB-control	PP5_OX	OK	4.88051	6.07194	0.315124	1.18021	0.0442	0.0635181	no
gene:Bra001165	gene:Bra001165	-	A03:15062787-15063667	DB-control	PP5_OX	NOTEST	0.184688	0.311412	0.753736	0	1	1	no
gene:Bra023320	gene:Bra023320	-	A02:2820222-2821595	DB-control	PP5_OX	OK	0.983621	1.48793	0.597135	1.3145	0.02235	0.0339308	yes
gene:Bra001167	gene:Bra001167	-	A03:15078866-15079219	DB-control	PP5_OX	NOTEST	0	0	0	0	1	1	no
gene:Bra037831	gene:Bra037831	-	A09:3826535-3827357	DB-control	PP5_OX	OK	3.19992	4.40389	0.460742	1.36635	0.02235	0.0339308	yes
gene:Bra011006	gene:Bra011006	-	A08:17565743-17567675	DB-control	PP5_OX	OK	8.4524	9.97513	0.238975	1.3166	0.0223	0.0338627	yes
gene:Bra001170	gene:Bra001170	-	A03:15095780-15096053	DB-control	PP5_OX	OK	1.22122	1.19949	-0.0259034	-0.014816	0.91245	0.927497	no
gene:Bra001171	gene:Bra001171	-	A03:15103422-15103694	DB-control	PP5_OX	NOTEST	0	0	0	0	1	1	no
gene:Bra001172	gene:Bra001172	-	A03:15110586-15112829	DB-control	PP5_OX	OK	10.3863	11.4238	0.137361	0.945575	0.1028	0.136896	no
gene:Bra001173	gene:Bra001173	-	A03:15115523-15116446	DB-control	PP5_OX	NOTEST	0.42955	0.258212	-0.73427	0	1	1	no
gene:Bra019889	gene:Bra019889	-	A06:3856441-3858381	DB-control	PP5_OX	OK	33.8042	31.062	-0.122051	-1.31948	0.0223	0.0338627	yes
gene:Bra023663	gene:Bra023663	-	A02:4404860-4405160	DB-control	PP5_OX	OK	13.0977	8.61385	-0.604581	-1.38581	0.0223	0.0338627	yes
gene:Bra037527	gene:Bra037527	-	A06:21056873-21058155	DB-control	PP5_OX	OK	9.90816	12.6067	0.347503	1.34868	0.0223	0.0338627	yes
gene:Bra018087	gene:Bra018087	-	A06:10128392-10129282	DB-control	PP5_OX	OK	51.8967	40.8053	-0.346885	-1.3139	0.02225	0.0337946	yes
gene:Bra001178	gene:Bra001178	-	A03:15157795-15158632	DB-control	PP5_OX	OK	1.18779	1.40821	0.245583	0.447326	0.43245	0.489536	no
gene:Bra030621	gene:Bra030621	-	A08:21045408-21047023	DB-control	PP5_OX	OK	0.468633	0.826704	0.818911	1.38115	0.02225	0.0337946	yes
gene:Bra001180	gene:Bra001180	-	A03:15167171-15167450	DB-control	PP5_OX	NOTEST	0	0	0	0	1	1	no
gene:Bra001181	gene:Bra001181	-	A03:15168457-15168808	DB-control	PP5_OX	NOTEST	0	0	0	0	1	1	no
gene:Bra026722	gene:Bra026722	-	A09:33398418-33402688	DB-control	PP5_OX	OK	3.7266	4.39509	0.238031	1.35306	0.0222	0.0337225	yes
gene:Bra001183	gene:Bra001183	-	A03:15186469-15187614	DB-control	PP5_OX	OK	1.35838	1.819	0.421261	0.707482	0.21685	0.266963	no
gene:Bra001184	gene:Bra001184	-	A03:15188242-15189854	DB-control	PP5_OX	OK	4.66418	4.30526	-0.115523	-0.583154	0.3117	0.366908	no
gene:Bra001185	gene:Bra001185	-	A03:15191342-15193103	DB-control	PP5_OX	NOTEST	0.125933	0.178867	0.506227	0	1	1	no
gene:Bra001186	gene:Bra001186	-	A03:15198127-15199942	DB-control	PP5_OX	OK	23.5689	22.1617	-0.0888105	-0.878768	0.1235	0.161731	no
gene:Bra001187	gene:Bra001187	-	A03:15202031-15202829	DB-control	PP5_OX	OK	7.28216	7.37873	0.0190069	0.0840052	0.87935	0.899247	no
gene:Bra001188	gene:Bra001188	-	A03:15214246-15215287	DB-control	PP5_OX	NOTEST	0	0	0	0	1	1	no
gene:Bra018924	gene:Bra018924	-	A06:1232971-1235967	DB-control	PP5_OX	OK	14.4782	16.0349	0.147336	1.30856	0.02215	0.0336485	yes
gene:Bra029615	gene:Bra029615	-	A05:22969724-22973245	DB-control	PP5_OX	OK	20.4344	22.0236	0.108051	1.30137	0.02215	0.0336485	yes
gene:Bra011671	gene:Bra011671	-	A01:1140659-1142548	DB-control	PP5_OX	OK	45.0428	40.4466	-0.15528	-1.32171	0.0221	0.0335765	yes
gene:Bra017876	gene:Bra017876	-	A03:31180441-31180972	DB-control	PP5_OX	OK	0.975317	2.08458	1.09582	1.45779	0.0221	0.0335765	yes
gene:Bra001193	gene:Bra001193	-	A03:15236740-15239341	DB-control	PP5_OX	OK	7.10269	8.02299	0.175773	1.00779	0.0842	0.114301	no
gene:Bra001194	gene:Bra001194	-	A03:15239736-15240345	DB-control	PP5_OX	OK	7.97215	9.68167	0.280288	1.11773	0.0527	0.0745098	no
gene:Bra001195	gene:Bra001195	-	A03:15244506-15247514	DB-control	PP5_OX	OK	3.80581	3.88263	0.028831	0.145745	0.7986	0.830152	no
gene:Bra001196	gene:Bra001196	-	A03:15248763-15251065	DB-control	PP5_OX	OK	18.8024	17.622	-0.0935393	-0.853282	0.14055	0.18123	no
gene:Bra001197	gene:Bra001197	-	A03:15256749-15257838	DB-control	PP5_OX	OK	3.81695	3.94211	0.0465485	0.0787377	0.8715	0.892436	no
gene:Bra032269	gene:Bra032269	-	A05:12134934-12137555	DB-control	PP5_OX	OK	110.287	121.819	0.143485	1.31698	0.0221	0.0335765	yes
gene:Bra001199	gene:Bra001199	-	A03:15268420-15269257	DB-control	PP5_OX	NOTEST	0.208233	0.241089	0.211364	0	1	1	no
gene:Bra012076	gene:Bra012076	-	A07:10167874-10169458	DB-control	PP5_OX	OK	0.98185	1.41839	0.530681	1.33267	0.02205	0.0335063	yes
gene:Bra040607	gene:Bra040607	-	A05:23538779-23543011	DB-control	PP5_OX	OK	23.2413	21.5524	-0.108837	-1.31692	0.02205	0.0335063	yes
gene:Bra001202	gene:Bra001202	-	A03:15282270-15284094	DB-control	PP5_OX	OK	4.16194	5.14918	0.307084	1.15274	0.04795	0.0683572	no
gene:Bra001203	gene:Bra001203	-	A03:15287019-15299357	DB-control	PP5_OX	OK	1.7643	1.9256	0.126206	0.886114	0.12545	0.163974	no
gene:Bra000155	gene:Bra000155	-	A03:9603978-9605862	DB-control	PP5_OX	OK	4.39817	5.38735	0.292671	1.35768	0.022	0.0334342	yes
gene:Bra001205	gene:Bra001205	-	A03:15310466-15312422	DB-control	PP5_OX	NOTEST	0	0	0	0	1	1	no
gene:Bra001206	gene:Bra001206	-	A03:15317930-15319509	DB-control	PP5_OX	NOTEST	0	0.0305853	inf	0	1	1	no
gene:Bra036377	gene:Bra036377	-	A07:1847593-1848055	DB-control	PP5_OX	OK	16.9122	13.6272	-0.311582	-1.34208	0.022	0.0334342	yes
gene:Bra001208	gene:Bra001208	-	A03:15325815-15331720	DB-control	PP5_OX	OK	8.8044	8.82019	0.00258542	0.0315693	0.952	0.958865	no
gene:Bra001209	gene:Bra001209	-	A03:15332053-15332593	DB-control	PP5_OX	NOTEST	0	0	0	0	1	1	no
gene:Bra001210	gene:Bra001210	-	A03:15346328-15350782	DB-control	PP5_OX	NOTEST	0	0.00599765	inf	0	1	1	no
gene:Bra001211	gene:Bra001211	-	A03:15352431-15354170	DB-control	PP5_OX	OK	3.87805	3.89415	0.00597782	0.022798	0.97985	0.982319	no
gene:Bra038211	gene:Bra038211	-	A01:21600966-21602572	DB-control	PP5_OX	OK	1.60715	0.815416	-0.978899	-1.48266	0.022	0.0334342	yes
gene:Bra011326	gene:Bra011326	-	A01:2717742-2721536	DB-control	PP5_OX	OK	20.151	22.0165	0.127732	1.33839	0.02195	0.033364	yes
gene:Bra001214	gene:Bra001214	-	A03:15371315-15372988	DB-control	PP5_OX	OK	17.4484	17.119	-0.0274979	-0.150653	0.7958	0.827602	no
gene:Bra012892	gene:Bra012892	-	A03:21688759-21690205	DB-control	PP5_OX	OK	0.117462	0.626103	2.4142	1.93517	0.02195	0.033364	yes
gene:Bra001216	gene:Bra001216	-	A03:15382098-15383317	DB-control	PP5_OX	OK	2.78643	3.16635	0.184403	0.475228	0.422	0.479318	no
gene:Bra001217	gene:Bra001217	-	A03:15384931-15385402	DB-control	PP5_OX	OK	0.651533	1.70855	1.39086	1.23561	0.0363	0.0530923	no
gene:Bra021483	gene:Bra021483	-	A01:25040131-25041353	DB-control	PP5_OX	OK	9.87049	8.40374	-0.232091	-1.32853	0.02195	0.033364	yes
gene:Bra001219	gene:Bra001219	-	A03:15394023-15396574	DB-control	PP5_OX	NOTEST	0	0	0	0	1	1	no
gene:Bra029246	gene:Bra029246	-	A02:26350049-26351870	DB-control	PP5_OX	OK	3.35587	4.87878	0.539834	1.31271	0.02195	0.033364	yes
gene:Bra021661	gene:Bra021661	-	A04:13703057-13705598	DB-control	PP5_OX	OK	9.3213	10.6368	0.190455	1.32976	0.0219	0.0332957	yes
gene:Bra029762	gene:Bra029762	-	A05:22356959-22359224	DB-control	PP5_OX	OK	7.55907	8.68398	0.200147	1.33122	0.0219	0.0332957	yes
gene:Bra035210	gene:Bra035210	-	A08:9155295-9156444	DB-control	PP5_OX	OK	0.783962	0.155361	-2.33516	-1.99283	0.0219	0.0332957	yes
gene:Bra038439	gene:Bra038439	-	A08:8732258-8733175	DB-control	PP5_OX	OK	42.6716	33.9999	-0.327747	-1.33411	0.0219	0.0332957	yes
gene:Bra008737	gene:Bra008737	-	A10:13634600-13636599	DB-control	PP5_OX	OK	57.2795	63.7913	0.155342	1.34196	0.02185	0.0332274	yes
gene:Bra001226	gene:Bra001226	-	A03:15421959-15422319	DB-control	PP5_OX	OK	3.0788	4.73519	0.621052	1.04124	0.08455	0.114723	no
gene:Bra001227	gene:Bra001227	-	A03:15422959-15424719	DB-control	PP5_OX	OK	5.9095	4.99661	-0.242086	-0.974111	0.0988	0.132085	no
gene:Bra001228	gene:Bra001228	-	A03:15425087-15427069	DB-control	PP5_OX	NOTEST	0	0	0	0	1	1	no
gene:Bra001229	gene:Bra001229	-	A03:15432536-15435343	DB-control	PP5_OX	NOTEST	0.301672	0.270901	-0.155219	0	1	1	no
gene:Bra001230	gene:Bra001230	-	A03:15437567-15438617	DB-control	PP5_OX	OK	0.718253	0.076376	-3.2333	-1.45203	0.22395	0.27466	no
gene:Bra033676	gene:Bra033676	-	A06:25683020-25685054	DB-control	PP5_OX	OK	0.670508	0.370918	-0.854156	-1.30658	0.02185	0.0332274	yes
gene:Bra005783	gene:Bra005783	-	A03:603454-604516	DB-control	PP5_OX	OK	2.12842	0.803465	-1.40547	-1.7761	0.0218	0.0331552	yes
gene:Bra001233	gene:Bra001233	-	A03:15445214-15447127	DB-control	PP5_OX	NOTEST	0	0.0175454	inf	0	1	1	no
gene:Bra001234	gene:Bra001234	-	A03:15448189-15449639	DB-control	PP5_OX	OK	7.2263	7.21562	-0.00213307	-0.0120345	0.9844	0.985789	no
gene:Bra010132	gene:Bra010132	-	A06:19614590-19616039	DB-control	PP5_OX	OK	24.1293	20.636	-0.225628	-1.33735	0.0218	0.0331552	yes
gene:Bra001236	gene:Bra001236	-	A03:15456995-15457661	DB-control	PP5_OX	OK	0.689351	1.06491	0.627427	0.905149	0.1205	0.15811	no
gene:Bra001237	gene:Bra001237	-	A03:15461143-15462442	DB-control	PP5_OX	NOTEST	0	0	0	0	1	1	no
gene:Bra001238	gene:Bra001238	-	A03:15465268-15466063	DB-control	PP5_OX	NOTEST	0	0	0	0	1	1	no
gene:Bra001239	gene:Bra001239	-	A03:15466357-15478432	DB-control	PP5_OX	NOTEST	0.00409694	0.00281826	-0.539745	0	1	1	no
gene:Bra034366	gene:Bra034366	-	A04:12162726-12166024	DB-control	PP5_OX	OK	8.92591	10.2124	0.194249	1.35297	0.02175	0.033083	yes
gene:Bra013045	gene:Bra013045	-	A03:20806823-20807114	DB-control	PP5_OX	OK	10.8673	15.7477	0.535138	1.32348	0.0217	0.0330088	yes
gene:Bra001242	gene:Bra001242	-	A03:15485967-15487362	DB-control	PP5_OX	NOTEST	0.0329328	0	#NAME?	0	1	1	no
gene:Bra001243	gene:Bra001243	-	A03:15488775-15490114	DB-control	PP5_OX	NOTEST	0.3205	0.424143	0.404226	0	1	1	no
gene:Bra015304	gene:Bra015304	-	A10:2569833-2570136	DB-control	PP5_OX	OK	4.15755	1.45157	-1.51812	-1.38691	0.0217	0.0330088	yes
gene:Bra001245	gene:Bra001245	-	A03:15495496-15498299	DB-control	PP5_OX	OK	8.79733	8.77201	-0.00415774	-0.029814	0.96955	0.973443	no
gene:Bra016798	gene:Bra016798	-	A08:20040412-20041093	DB-control	PP5_OX	OK	0.825746	1.54555	0.904349	1.27526	0.0217	0.0330088	yes
gene:Bra032334	gene:Bra032334	-	A09:22453935-22454577	DB-control	PP5_OX	OK	2.82721	4.26274	0.592402	1.36018	0.0217	0.0330088	yes
gene:Bra001248	gene:Bra001248	-	A03:15519239-15519729	DB-control	PP5_OX	NOTEST	0	0	0	0	1	1	no
gene:Bra032363	gene:Bra032363	-	A09:22143375-22144203	DB-control	PP5_OX	OK	0.861334	0.196028	-2.13551	-1.63199	0.02165	0.0329404	yes
gene:Bra001250	gene:Bra001250	-	A03:15525343-15527924	DB-control	PP5_OX	OK	7.10087	7.99479	0.171064	1.22087	0.0351	0.0514834	no
gene:Bra001251	gene:Bra001251	-	A03:15529570-15529867	DB-control	PP5_OX	NOTEST	0	0.408239	inf	0	1	1	no
gene:Bra001252	gene:Bra001252	-	A03:15530270-15530555	DB-control	PP5_OX	NOTEST	0	0	0	0	1	1	no
gene:Bra029729	gene:Bra029729	-	A05:22488077-22489873	DB-control	PP5_OX	OK	11.2213	12.9632	0.208175	1.33666	0.0216	0.0328662	yes
gene:Bra001254	gene:Bra001254	-	A03:15537575-15538037	DB-control	PP5_OX	NOTEST	0.0367733	0	#NAME?	0	1	1	no
gene:Bra001255	gene:Bra001255	-	A03:15540762-15541542	DB-control	PP5_OX	NOTEST	0.224665	0.482767	1.10355	0	1	1	no
gene:Bra035272	gene:Bra035272	-	A08:9740773-9741022	DB-control	PP5_OX	OK	7.1007	12.5609	0.822904	1.35741	0.0216	0.0328662	yes
gene:Bra001257	gene:Bra001257	-	A03:15549232-15550789	DB-control	PP5_OX	OK	53.0799	55.1452	0.0550698	0.71467	0.2232	0.273881	no
gene:Bra002153	gene:Bra002153	-	A10:11214192-11221776	DB-control	PP5_OX	OK	0.8553	0.652232	-0.391044	-1.33909	0.02155	0.032794	yes
gene:Bra001259	gene:Bra001259	-	A03:15554218-15556041	DB-control	PP5_OX	NOTEST	0.239704	0.300799	0.327542	0	1	1	no
gene:Bra001260	gene:Bra001260	-	A03:15557186-15558099	DB-control	PP5_OX	OK	10.5386	10.6939	0.0210953	0.0793511	0.89785	0.914959	no
gene:Bra001261	gene:Bra001261	-	A03:15558386-15558968	DB-control	PP5_OX	NOTEST	0.275915	0	#NAME?	0	1	1	no
gene:Bra001262	gene:Bra001262	-	A03:15560620-15562819	DB-control	PP5_OX	OK	1.28411	1.73731	0.436085	1.03076	0.0803	0.109579	no
gene:Bra001263	gene:Bra001263	-	A03:15563406-15565224	DB-control	PP5_OX	OK	25.7488	26.0748	0.0181505	0.131371	0.8156	0.844614	no
gene:Bra018852	gene:Bra018852	-	A06:1603144-1604291	DB-control	PP5_OX	OK	36.061	31.5986	-0.190579	-1.32499	0.02155	0.032794	yes
gene:Bra031838	gene:Bra031838	-	A02:27611348-27613482	DB-control	PP5_OX	OK	0.719638	1.12211	0.640877	1.33256	0.02155	0.032794	yes
gene:Bra001266	gene:Bra001266	-	A03:15574722-15575682	DB-control	PP5_OX	OK	3.65993	3.30324	-0.147932	-0.404835	0.48395	0.540127	no
gene:Bra005729	gene:Bra005729	-	A03:324778-327062	DB-control	PP5_OX	OK	0.528527	1.05723	1.00024	1.39308	0.0215	0.0327236	yes
gene:Bra001268	gene:Bra001268	-	A03:15580364-15581748	DB-control	PP5_OX	NOTEST	0	0.185226	inf	0	1	1	no
gene:Bra001269	gene:Bra001269	-	A03:15586140-15587782	DB-control	PP5_OX	NOTEST	0	0.0559837	inf	0	1	1	no
gene:Bra001270	gene:Bra001270	-	A03:15589660-15591662	DB-control	PP5_OX	NOTEST	0	0	0	0	1	1	no
gene:Bra006823	gene:Bra006823	-	A03:5205161-5207384	DB-control	PP5_OX	OK	2.97225	4.86543	0.711014	1.32142	0.0215	0.0327236	yes
gene:Bra001272	gene:Bra001272	-	A03:15598027-15598871	DB-control	PP5_OX	NOTEST	0	0.0304509	inf	0	1	1	no
gene:Bra013404	gene:Bra013404	-	A01:5461582-5463436	DB-control	PP5_OX	OK	1.96204	2.5846	0.397586	1.39575	0.0215	0.0327236	yes
gene:Bra015218	gene:Bra015218	-	A10:3338839-3340156	DB-control	PP5_OX	OK	35.9296	39.1163	0.122596	1.34748	0.0215	0.0327236	yes
gene:Bra031945	gene:Bra031945	-	A02:26972229-26972811	DB-control	PP5_OX	OK	1.15333	0.308007	-1.90476	-1.42095	0.0215	0.0327236	yes
gene:Bra001276	gene:Bra001276	-	A03:15611887-15612551	DB-control	PP5_OX	OK	40.3965	32.7345	-0.30342	-0.814972	0.1542	0.197127	no
gene:Bra001277	gene:Bra001277	-	A03:15615249-15617378	DB-control	PP5_OX	NOTEST	0.495842	0.109746	-2.17571	0	1	1	no
gene:Bra001278	gene:Bra001278	-	A03:15618437-15621542	DB-control	PP5_OX	NOTEST	0.0456875	0	#NAME?	0	1	1	no
gene:Bra001279	gene:Bra001279	-	A03:15625303-15627770	DB-control	PP5_OX	NOTEST	0.0338694	0.0358698	0.0827842	0	1	1	no
gene:Bra033705	gene:Bra033705	-	A06:25506029-25509845	DB-control	PP5_OX	OK	5.3261	4.25261	-0.32473	-1.34827	0.0215	0.0327236	yes
gene:Bra038682	gene:Bra038682	-	A01:26635218-26639097	DB-control	PP5_OX	OK	40.3166	44.7915	0.151851	1.31376	0.0215	0.0327236	yes
gene:Bra001282	gene:Bra001282	-	A03:15639066-15642182	DB-control	PP5_OX	NOTEST	0.073967	0	#NAME?	0	1	1	no
gene:Bra001283	gene:Bra001283	-	A03:15660450-15665236	DB-control	PP5_OX	NOTEST	0.490705	0.386705	-0.343624	0	1	1	no
gene:Bra000728	gene:Bra000728	-	A03:12693833-12694691	DB-control	PP5_OX	OK	51.4745	57.0985	0.149594	1.38308	0.02145	0.0326607	yes
gene:Bra001285	gene:Bra001285	-	A03:15679785-15681218	DB-control	PP5_OX	OK	7.69213	8.91528	0.212896	1.0305	0.0742	0.102013	no
gene:Bra013913	gene:Bra013913	-	A01:8416066-8418229	DB-control	PP5_OX	OK	38.1686	41.377	0.116444	1.32454	0.02145	0.0326607	yes
gene:Bra001287	gene:Bra001287	-	A03:15695788-15702991	DB-control	PP5_OX	OK	1.34396	1.3968	0.0556328	0.251592	0.66185	0.707896	no
gene:Bra001288	gene:Bra001288	-	A03:15703544-15705391	DB-control	PP5_OX	OK	4.09731	3.3541	-0.288751	-1.10108	0.05655	0.0795463	no
gene:Bra016472	gene:Bra016472	-	A08:18629270-18633632	DB-control	PP5_OX	OK	12.4424	11.3371	-0.134209	-1.36761	0.02145	0.0326607	yes
gene:Bra016521	gene:Bra016521	-	A08:18862472-18864909	DB-control	PP5_OX	OK	10.8287	12.1409	0.165019	1.34547	0.02145	0.0326607	yes
gene:Bra018032	gene:Bra018032	-	A06:9634215-9634890	DB-control	PP5_OX	OK	3.02599	4.21377	0.477703	1.34484	0.02145	0.0326607	yes
gene:Bra001949	gene:Bra001949	-	A03:19525753-19528072	DB-control	PP5_OX	OK	3.20161	4.08369	0.351075	1.3509	0.0214	0.032594	yes
gene:Bra010492	gene:Bra010492	-	A08:14810152-14810812	DB-control	PP5_OX	OK	1.38943	0.445899	-1.63971	-1.58664	0.0214	0.032594	yes
gene:Bra001294	gene:Bra001294	-	A03:15725607-15726469	DB-control	PP5_OX	NOTEST	0	0	0	0	1	1	no
gene:Bra001295	gene:Bra001295	-	A03:15728945-15730143	DB-control	PP5_OX	OK	12.9765	11.3164	-0.197477	-0.937736	0.10585	0.14063	no
gene:Bra001296	gene:Bra001296	-	A03:15731382-15732942	DB-control	PP5_OX	OK	7.91676	8.51471	0.105046	0.675764	0.2445	0.2968	no
gene:Bra015730	gene:Bra015730	-	A07:21135836-21138283	DB-control	PP5_OX	OK	4.37635	5.2543	0.263768	1.33352	0.0214	0.032594	yes
gene:Bra029889	gene:Bra029889	-	A05:21850765-21851710	DB-control	PP5_OX	OK	0.604261	0.162052	-1.89872	-1.45687	0.0214	0.032594	yes
gene:Bra001299	gene:Bra001299	-	A03:15749064-15751124	DB-control	PP5_OX	NOTEST	0.0406041	0.0431257	0.0869221	0	1	1	no
gene:Bra031242	gene:Bra031242	-	A05:16738880-16740312	DB-control	PP5_OX	OK	7.05862	8.58535	0.282491	1.34623	0.0214	0.032594	yes
gene:Bra040423	gene:Bra040423	-	A04:141841-142264	DB-control	PP5_OX	OK	9.058	6.51786	-0.474795	-1.32802	0.0214	0.032594	yes
gene:Bra015795	gene:Bra015795	-	A07:20825008-20826929	DB-control	PP5_OX	OK	16.3702	18.1938	0.152377	1.33482	0.02135	0.0325292	yes
gene:Bra001303	gene:Bra001303	-	A03:15763462-15764041	DB-control	PP5_OX	NOTEST	0	0	0	0	1	1	no
gene:Bra001304	gene:Bra001304	-	A03:15765208-15768058	DB-control	PP5_OX	NOTEST	0	0	0	0	1	1	no
gene:Bra001305	gene:Bra001305	-	A03:15770216-15772079	DB-control	PP5_OX	NOTEST	0	0	0	0	1	1	no
gene:Bra017602	gene:Bra017602	-	A09:16843281-16846676	DB-control	PP5_OX	OK	48.6072	53.9458	0.150341	1.31479	0.02135	0.0325292	yes
gene:Bra026818	gene:Bra026818	-	A09:33854836-33857485	DB-control	PP5_OX	OK	0.62234	1.30369	1.06683	1.4134	0.02135	0.0325292	yes
gene:Bra001308	gene:Bra001308	-	A03:15779777-15782360	DB-control	PP5_OX	NOTEST	0.184321	0.0581648	-1.664	0	1	1	no
gene:Bra001309	gene:Bra001309	-	A03:15783597-15783933	DB-control	PP5_OX	NOTEST	0	0	0	0	1	1	no
gene:Bra001310	gene:Bra001310	-	A03:15784595-15785582	DB-control	PP5_OX	NOTEST	0	0	0	0	1	1	no
gene:Bra001311	gene:Bra001311	-	A03:15786565-15788716	DB-control	PP5_OX	NOTEST	0	0	0	0	1	1	no
gene:Bra001312	gene:Bra001312	-	A03:15790296-15794278	DB-control	PP5_OX	OK	10.9313	10.4811	-0.060671	-0.534682	0.36295	0.419709	no
gene:Bra035254	gene:Bra035254	-	A08:9617171-9617655	DB-control	PP5_OX	OK	14.5834	10.9879	-0.408401	-1.33209	0.02135	0.0325292	yes
gene:Bra036532	gene:Bra036532	-	A09:1614746-1615356	DB-control	PP5_OX	OK	3.29962	2.00407	-0.719364	-1.39715	0.02135	0.0325292	yes
gene:Bra001315	gene:Bra001315	-	A03:15811577-15815447	DB-control	PP5_OX	NOTEST	0.0481306	0.0110596	-2.12166	0	1	1	no
gene:Bra037097	gene:Bra037097	-	A05:10034655-10037542	DB-control	PP5_OX	OK	1.40536	1.94204	0.466631	1.3517	0.02135	0.0325292	yes
gene:Bra009055	gene:Bra009055	-	A10:15051379-15055720	DB-control	PP5_OX	OK	42.2832	37.9733	-0.155098	-1.31249	0.0213	0.0324643	yes
gene:Bra001318	gene:Bra001318	-	A03:15821575-15822091	DB-control	PP5_OX	NOTEST	0	0	0	0	1	1	no
gene:Bra001319	gene:Bra001319	-	A03:15830538-15830874	DB-control	PP5_OX	NOTEST	0.139834	0	#NAME?	0	1	1	no
gene:Bra019063	gene:Bra019063	-	A03:26486697-26489727	DB-control	PP5_OX	OK	1.23309	1.56411	0.343061	1.36303	0.0213	0.0324643	yes
gene:Bra001321	gene:Bra001321	-	A03:15838598-15839677	DB-control	PP5_OX	NOTEST	0	0	0	0	1	1	no
gene:Bra001322	gene:Bra001322	-	A03:15840217-15843970	DB-control	PP5_OX	NOTEST	0.029454	0	#NAME?	0	1	1	no
gene:Bra011276	gene:Bra011276	-	A01:2971406-2973136	DB-control	PP5_OX	OK	2.63183	3.40219	0.370399	1.34051	0.02125	0.0323919	yes
gene:Bra018758	gene:Bra018758	-	A06:2164752-2166809	DB-control	PP5_OX	OK	1.03976	0.685834	-0.600322	-1.37371	0.02125	0.0323919	yes
gene:Bra001325	gene:Bra001325	-	A03:15848950-15850819	DB-control	PP5_OX	OK	7.81799	6.57724	-0.249316	-1.19633	0.0382	0.0556079	no
gene:Bra032465	gene:Bra032465	-	A09:36188286-36191217	DB-control	PP5_OX	OK	1.91464	1.31906	-0.537563	-1.3581	0.02125	0.0323919	yes
gene:Bra001327	gene:Bra001327	-	A03:15860442-15862506	DB-control	PP5_OX	OK	1.66776	1.34549	-0.309779	-1.06733	0.06615	0.0918301	no
gene:Bra001328	gene:Bra001328	-	A03:15864301-15864802	DB-control	PP5_OX	NOTEST	0	0	0	0	1	1	no
gene:Bra001329	gene:Bra001329	-	A03:15865779-15867574	DB-control	PP5_OX	NOTEST	0	0	0	0	1	1	no
gene:Bra001330	gene:Bra001330	-	A03:15869336-15877246	DB-control	PP5_OX	NOTEST	0.273546	0.465379	0.766624	0	1	1	no
gene:Bra001982	gene:Bra001982	-	A10:12500377-12502222	DB-control	PP5_OX	OK	7.53288	9.37697	0.315922	1.36344	0.0212	0.0323213	yes
gene:Bra011498	gene:Bra011498	-	A01:1935543-1937862	DB-control	PP5_OX	OK	0.718196	0.332041	-1.11302	-1.60164	0.0212	0.0323213	yes
gene:Bra026081	gene:Bra026081	-	A06:6216500-6218407	DB-control	PP5_OX	OK	1.79345	1.21076	-0.56682	-1.37681	0.0212	0.0323213	yes
gene:Bra032454	gene:Bra032454	-	A09:36140740-36141566	DB-control	PP5_OX	OK	17.4883	14.0518	-0.315633	-1.32072	0.0212	0.0323213	yes
gene:Bra012863	gene:Bra012863	-	A03:21881619-21882313	DB-control	PP5_OX	OK	3.07596	1.9399	-0.665052	-1.42314	0.02115	0.0322526	yes
gene:Bra025552	gene:Bra025552	-	A04:7925551-7926976	DB-control	PP5_OX	OK	1.21149	0.584008	-1.05272	-1.47954	0.02115	0.0322526	yes
gene:Bra034227	gene:Bra034227	-	A01:26839707-26840904	DB-control	PP5_OX	OK	5.34369	6.62162	0.309347	1.34235	0.0211	0.03218	yes
gene:Bra001338	gene:Bra001338	-	A03:15914038-15915498	DB-control	PP5_OX	NOTEST	0	0	0	0	1	1	no
gene:Bra001339	gene:Bra001339	-	A03:15916045-15916861	DB-control	PP5_OX	NOTEST	0	0.491277	inf	0	1	1	no
gene:Bra001340	gene:Bra001340	-	A03:15918906-15919269	DB-control	PP5_OX	NOTEST	0	0	0	0	1	1	no
gene:Bra001341	gene:Bra001341	-	A03:15921762-15924871	DB-control	PP5_OX	NOTEST	0	0	0	0	1	1	no
gene:Bra001342	gene:Bra001342	-	A03:15926265-15933877	DB-control	PP5_OX	OK	18.484	19.7104	0.0926761	0.807142	0.1583	0.2017	no
gene:Bra001343	gene:Bra001343	-	A03:15934774-15935924	DB-control	PP5_OX	NOTEST	0	0.0933144	inf	0	1	1	no
gene:Bra039466	gene:Bra039466	-	A05:23467108-23469734	DB-control	PP5_OX	OK	7.84358	8.90302	0.182782	1.33586	0.0211	0.03218	yes
gene:Bra000873	gene:Bra000873	-	A03:13628621-13630950	DB-control	PP5_OX	OK	70.2626	65.2216	-0.107409	-1.33124	0.021	0.0320313	yes
gene:Bra001346	gene:Bra001346	-	A03:15945441-15946133	DB-control	PP5_OX	OK	11.1433	9.28438	-0.263303	-0.929046	0.11125	0.147127	no
gene:Bra013151	gene:Bra013151	-	A03:20174396-20175676	DB-control	PP5_OX	OK	3.52387	2.26319	-0.638801	-1.46653	0.021	0.0320313	yes
gene:Bra018145	gene:Bra018145	-	A06:10590820-10597432	DB-control	PP5_OX	OK	2.32586	2.70929	0.220151	1.36366	0.021	0.0320313	yes
gene:Bra038759	gene:Bra038759	-	A03:24229585-24230017	DB-control	PP5_OX	OK	3.08882	1.11134	-1.47475	-1.65545	0.021	0.0320313	yes
gene:Bra040264	gene:Bra040264	-	Scaffold000193:131552-134831	DB-control	PP5_OX	OK	1.11063	1.63754	0.560149	1.4032	0.021	0.0320313	yes
gene:Bra001351	gene:Bra001351	-	A03:15963482-15963791	DB-control	PP5_OX	OK	50.6495	45.2382	-0.163007	-0.447132	0.44715	0.50435	no
gene:Bra040576	gene:Bra040576	-	Scaffold000219:42987-45063	DB-control	PP5_OX	OK	30.9142	27.7167	-0.157514	-1.33198	0.021	0.0320313	yes
gene:Bra001353	gene:Bra001353	-	A03:15973579-15974179	DB-control	PP5_OX	NOTEST	0.204978	0.120803	-0.76281	0	1	1	no
gene:Bra013837	gene:Bra013837	-	A01:8013821-8014550	DB-control	PP5_OX	OK	23.229	20.2545	-0.197683	-1.34684	0.02095	0.0319661	yes
gene:Bra017303	gene:Bra017303	-	A04:15458428-15459819	DB-control	PP5_OX	OK	74.3378	66.6302	-0.157921	-1.34323	0.02095	0.0319661	yes
gene:Bra001356	gene:Bra001356	-	A03:15983370-15991335	DB-control	PP5_OX	OK	6.58537	6.87488	0.0620697	0.558943	0.3255	0.381051	no
gene:Bra035838	gene:Bra035838	-	A09:3366914-3369870	DB-control	PP5_OX	OK	0.86741	1.24068	0.516345	1.35863	0.02095	0.0319661	yes
gene:Bra000042	gene:Bra000042	-	A03:8984600-8985799	DB-control	PP5_OX	OK	17.2277	14.8362	-0.215612	-1.34349	0.0209	0.0318954	yes
gene:Bra008636	gene:Bra008636	-	A10:13180590-13181076	DB-control	PP5_OX	OK	4.14686	6.0141	0.536328	1.35846	0.0209	0.0318954	yes
gene:Bra001360	gene:Bra001360	-	A03:16002346-16003552	DB-control	PP5_OX	NOTEST	0	0	0	0	1	1	no
gene:Bra001361	gene:Bra001361	-	A03:16004802-16005334	DB-control	PP5_OX	NOTEST	0	0	0	0	1	1	no
gene:Bra001362	gene:Bra001362	-	A03:16005995-16007168	DB-control	PP5_OX	NOTEST	0	0	0	0	1	1	no
gene:Bra001363	gene:Bra001363	-	A03:16008248-16008785	DB-control	PP5_OX	NOTEST	0	0	0	0	1	1	no
gene:Bra001364	gene:Bra001364	-	A03:16010838-16013064	DB-control	PP5_OX	NOTEST	0	0	0	0	1	1	no
gene:Bra011685	gene:Bra011685	-	A01:1059149-1060552	DB-control	PP5_OX	OK	13.671	11.8957	-0.200671	-1.34914	0.0209	0.0318954	yes
gene:Bra019261	gene:Bra019261	-	A03:25382852-25383455	DB-control	PP5_OX	OK	2.42334	1.3782	-0.814206	-1.52592	0.0209	0.0318954	yes
gene:Bra024555	gene:Bra024555	-	A09:24441062-24442433	DB-control	PP5_OX	OK	32.2013	35.0243	0.121236	1.35231	0.0209	0.0318954	yes
gene:Bra031751	gene:Bra031751	-	A09:34920241-34922191	DB-control	PP5_OX	OK	15.3723	13.8133	-0.154271	-1.34041	0.0209	0.0318954	yes
gene:Bra001369	gene:Bra001369	-	A03:16036684-16038600	DB-control	PP5_OX	OK	4.41275	4.9445	0.164148	0.635409	0.2706	0.3243	no
gene:Bra001370	gene:Bra001370	-	A03:16040102-16040912	DB-control	PP5_OX	NOTEST	0	0	0	0	1	1	no
gene:Bra003433	gene:Bra003433	-	A07:13164488-13165916	DB-control	PP5_OX	OK	23.7715	20.606	-0.206167	-1.36554	0.02085	0.0318302	yes
gene:Bra016506	gene:Bra016506	-	A08:18793273-18793811	DB-control	PP5_OX	OK	162.099	179.543	0.147453	1.35314	0.02085	0.0318302	yes
gene:Bra019951	gene:Bra019951	-	A06:3538133-3540192	DB-control	PP5_OX	OK	0.279608	0.611017	1.12781	1.32178	0.02085	0.0318302	yes
gene:Bra021054	gene:Bra021054	-	A08:10181380-10185446	DB-control	PP5_OX	OK	13.9442	15.1376	0.118467	1.35378	0.02085	0.0318302	yes
gene:Bra001375	gene:Bra001375	-	A03:16062924-16065560	DB-control	PP5_OX	NOTEST	0.246816	0.0476617	-2.37254	0	1	1	no
gene:Bra004360	gene:Bra004360	-	A07:18217537-18218438	DB-control	PP5_OX	OK	11.0477	8.95991	-0.302184	-1.33421	0.0208	0.0317612	yes
gene:Bra019640	gene:Bra019640	-	A06:5345135-5349774	DB-control	PP5_OX	OK	1.17381	0.774298	-0.600239	-1.39412	0.0208	0.0317612	yes
gene:Bra001378	gene:Bra001378	-	A03:16079736-16080033	DB-control	PP5_OX	OK	6.21121	5.27876	-0.234674	-0.394467	0.51625	0.571175	no
gene:Bra020462	gene:Bra020462	-	A02:6910648-6913068	DB-control	PP5_OX	OK	2.77444	3.84696	0.471522	1.30894	0.02075	0.0316886	yes
gene:Bra001380	gene:Bra001380	-	A03:16083598-16085796	DB-control	PP5_OX	NOTEST	0	0	0	0	1	1	no
gene:Bra001381	gene:Bra001381	-	A03:16088243-16088834	DB-control	PP5_OX	NOTEST	0.0544298	0.0373673	-0.542621	0	1	1	no
gene:Bra001382	gene:Bra001382	-	A03:16092610-16094948	DB-control	PP5_OX	NOTEST	0	0	0	0	1	1	no
gene:Bra001383	gene:Bra001383	-	A03:16100010-16102048	DB-control	PP5_OX	NOTEST	0.155935	0.300204	0.944996	0	1	1	no
gene:Bra001384	gene:Bra001384	-	A03:16109717-16110275	DB-control	PP5_OX	OK	2.48041	1.78923	-0.471236	-0.550582	0.2973	0.352327	no
gene:Bra001385	gene:Bra001385	-	A03:16115935-16116248	DB-control	PP5_OX	NOTEST	0.49647	1.22353	1.30127	0	1	1	no
gene:Bra001386	gene:Bra001386	-	A03:16118803-16119958	DB-control	PP5_OX	OK	1.19579	1.09966	-0.120898	-0.268338	0.6496	0.696582	no
gene:Bra001387	gene:Bra001387	-	A03:16122658-16125932	DB-control	PP5_OX	NOTEST	0	0	0	0	1	1	no
gene:Bra001388	gene:Bra001388	-	A03:16127330-16130066	DB-control	PP5_OX	NOTEST	0	0.00610293	inf	0	1	1	no
gene:Bra021017	gene:Bra021017	-	A08:10463977-10468785	DB-control	PP5_OX	OK	33.477	37.0706	0.147103	1.31335	0.02075	0.0316886	yes
gene:Bra035047	gene:Bra035047	-	A07:21938712-21941116	DB-control	PP5_OX	OK	9.86787	7.77158	-0.344532	-1.3672	0.02075	0.0316886	yes
gene:Bra000644	gene:Bra000644	-	A03:12232958-12235019	DB-control	PP5_OX	OK	0.971395	0.654344	-0.57001	-1.38179	0.0207	0.0316177	yes
gene:Bra005787	gene:Bra005787	-	A03:619158-621534	DB-control	PP5_OX	OK	68.6856	61.7161	-0.154359	-1.31065	0.0207	0.0316177	yes
gene:Bra006125	gene:Bra006125	-	A03:2126276-2127122	DB-control	PP5_OX	OK	33.9759	37.6021	0.1463	1.37757	0.0207	0.0316177	yes
gene:Bra001394	gene:Bra001394	-	A03:16169574-16170081	DB-control	PP5_OX	NOTEST	0	0	0	0	1	1	no
gene:Bra001395	gene:Bra001395	-	A03:16175647-16177111	DB-control	PP5_OX	OK	0.796775	0.999497	0.327029	0.69777	0.2262	0.277148	no
gene:Bra019996	gene:Bra019996	-	A06:3330494-3337457	DB-control	PP5_OX	OK	8.01931	8.83218	0.139291	1.3311	0.0207	0.0316177	yes
gene:Bra025653	gene:Bra025653	-	A04:7232267-7233360	DB-control	PP5_OX	OK	5.58667	4.28679	-0.382094	-1.33922	0.0207	0.0316177	yes
gene:Bra007432	gene:Bra007432	-	A09:29173579-29176460	DB-control	PP5_OX	OK	10.3256	12.0537	0.223251	1.36656	0.02065	0.0315505	yes
gene:Bra001399	gene:Bra001399	-	A03:16183475-16186115	DB-control	PP5_OX	OK	8.53432	9.58429	0.167396	1.18141	0.04175	0.0603474	no
gene:Bra001400	gene:Bra001400	-	A03:16186943-16189193	DB-control	PP5_OX	NOTEST	0	0	0	0	1	1	no
gene:Bra008370	gene:Bra008370	-	A02:15142444-15144356	DB-control	PP5_OX	OK	12.4529	10.6286	-0.228533	-1.33896	0.02065	0.0315505	yes
gene:Bra001402	gene:Bra001402	-	A03:16199381-16201790	DB-control	PP5_OX	NOTEST	0.30104	0.188907	-0.672279	0	1	1	no
gene:Bra001403	gene:Bra001403	-	A03:16205575-16205815	DB-control	PP5_OX	NOTEST	0	0	0	0	1	1	no
gene:Bra001404	gene:Bra001404	-	A03:16206978-16208910	DB-control	PP5_OX	NOTEST	0	0	0	0	1	1	no
gene:Bra001405	gene:Bra001405	-	A03:16219937-16223066	DB-control	PP5_OX	OK	1.7413	1.58376	-0.136815	-0.343844	0.5548	0.607935	no
gene:Bra024458	gene:Bra024458	-	A06:15899668-15901401	DB-control	PP5_OX	OK	109.459	94.3233	-0.214702	-1.32178	0.02065	0.0315505	yes
gene:Bra037136	gene:Bra037136	-	A09:4306867-4308282	DB-control	PP5_OX	OK	18.0343	20.9674	0.217411	1.34367	0.02065	0.0315505	yes
gene:Bra005383	gene:Bra005383	-	A05:5128621-5130666	DB-control	PP5_OX	OK	6.62372	5.51042	-0.265478	-1.36315	0.0206	0.0314815	yes
gene:Bra001409	gene:Bra001409	-	A03:16240951-16241935	DB-control	PP5_OX	NOTEST	0.154813	0.0353417	-2.13109	0	1	1	no
gene:Bra004444	gene:Bra004444	-	A05:148080-149692	DB-control	PP5_OX	OK	271.654	246.211	-0.141874	-1.31616	0.02055	0.0314069	yes
gene:Bra012182	gene:Bra012182	-	A07:9494625-9494955	DB-control	PP5_OX	OK	21.8036	16.7591	-0.379624	-1.35529	0.02055	0.0314069	yes
gene:Bra001412	gene:Bra001412	-	A03:16260074-16261742	DB-control	PP5_OX	NOTEST	0	0	0	0	1	1	no
gene:Bra001413	gene:Bra001413	-	A03:16264474-16264834	DB-control	PP5_OX	OK	2.04133	3.09663	0.60119	0.771614	0.19125	0.238386	no
gene:Bra015184	gene:Bra015184	-	A07:2559225-2561710	DB-control	PP5_OX	OK	0.820367	0.37516	-1.12877	-1.44998	0.02055	0.0314069	yes
gene:Bra019664	gene:Bra019664	-	A06:5108647-5110661	DB-control	PP5_OX	OK	17.0924	15.0475	-0.183835	-1.3508	0.02055	0.0314069	yes
gene:Bra029745	gene:Bra029745	-	A05:22435285-22436006	DB-control	PP5_OX	OK	45.9177	50.6111	0.140405	1.40263	0.02055	0.0314069	yes
gene:Bra032038	gene:Bra032038	-	A04:11317215-11318839	DB-control	PP5_OX	OK	101.069	112.878	0.159416	1.34078	0.02055	0.0314069	yes
gene:Bra001418	gene:Bra001418	-	A03:16285598-16287693	DB-control	PP5_OX	OK	34.906	33.41	-0.0631961	-0.499944	0.38825	0.445027	no
gene:Bra001419	gene:Bra001419	-	A03:16293780-16294811	DB-control	PP5_OX	NOTEST	0.0556903	0	#NAME?	0	1	1	no
gene:Bra024271	gene:Bra024271	-	A06:14657636-14659857	DB-control	PP5_OX	OK	31.261	28.935	-0.111549	-1.33508	0.0205	0.0313414	yes
gene:Bra001421	gene:Bra001421	-	A03:16298309-16299637	DB-control	PP5_OX	OK	48.8473	51.856	0.0862319	0.889626	0.12495	0.163385	no
gene:Bra024389	gene:Bra024389	-	A06:15438811-15439421	DB-control	PP5_OX	OK	18.1826	14.5893	-0.317645	-1.37093	0.0205	0.0313414	yes
gene:Bra003504	gene:Bra003504	-	A07:13508403-13509465	DB-control	PP5_OX	OK	39.7147	42.9239	0.112108	1.34474	0.02045	0.0312686	yes
gene:Bra001424	gene:Bra001424	-	A03:16307496-16309687	DB-control	PP5_OX	NOTEST	0.0366951	0.567839	3.95182	0	1	1	no
gene:Bra005898	gene:Bra005898	-	A03:1098998-1099742	DB-control	PP5_OX	OK	1.96407	1.17917	-0.736073	-1.56428	0.02045	0.0312686	yes
gene:Bra026649	gene:Bra026649	-	A02:21094229-21094898	DB-control	PP5_OX	OK	104.872	96.8775	-0.114399	-1.34874	0.02045	0.0312686	yes
gene:Bra001427	gene:Bra001427	-	A03:16329160-16330547	DB-control	PP5_OX	NOTEST	0.053654	0	#NAME?	0	1	1	no
gene:Bra040305	gene:Bra040305	-	Scaffold000196:46441-47869	DB-control	PP5_OX	OK	0.563493	1.2613	1.16244	1.53877	0.02045	0.0312686	yes
gene:ENSRNA049460566	gene:ENSRNA049460566	U1	A09:1960978-1961140	DB-control	PP5_OX	OK	8.00978	30.6534	1.93621	1.50743	0.02045	0.0312686	yes
gene:Bra002425	gene:Bra002425	-	A10:9653452-9655071	DB-control	PP5_OX	OK	28.4905	25.4954	-0.160244	-1.36317	0.0204	0.0312013	yes
gene:Bra023562	gene:Bra023562	-	A02:3939513-3941052	DB-control	PP5_OX	OK	0.879536	0.54994	-0.677468	-1.3278	0.0204	0.0312013	yes
gene:Bra001432	gene:Bra001432	-	A03:16353235-16354273	DB-control	PP5_OX	NOTEST	0	0	0	0	1	1	no
gene:Bra001433	gene:Bra001433	-	A03:16356267-16358318	DB-control	PP5_OX	NOTEST	0	0	0	0	1	1	no
gene:Bra001434	gene:Bra001434	-	A03:16362543-16364030	DB-control	PP5_OX	NOTEST	0	0.0292593	inf	0	1	1	no
gene:Bra001435	gene:Bra001435	-	A03:16365859-16368858	DB-control	PP5_OX	OK	16.0763	16.6177	0.0477857	0.485245	0.403	0.460106	no
gene:Bra001436	gene:Bra001436	-	A03:16369572-16371292	DB-control	PP5_OX	OK	5.33249	4.64219	-0.200004	-0.672606	0.2399	0.291823	no
gene:Bra023955	gene:Bra023955	-	A03:28609465-28611931	DB-control	PP5_OX	OK	0.955454	1.28877	0.43174	1.38977	0.0204	0.0312013	yes
gene:Bra001438	gene:Bra001438	-	A03:16378922-16380926	DB-control	PP5_OX	OK	5.6787	5.61924	-0.0151865	-0.0685933	0.9113	0.926538	no
gene:Bra001439	gene:Bra001439	-	A03:16382139-16383560	DB-control	PP5_OX	NOTEST	0	0	0	0	1	1	no
gene:Bra001440	gene:Bra001440	-	A03:16385502-16387883	DB-control	PP5_OX	NOTEST	0.0369993	0.0185077	-0.999373	0	1	1	no
gene:Bra001441	gene:Bra001441	-	A03:16399220-16399588	DB-control	PP5_OX	NOTEST	0	0	0	0	1	1	no
gene:Bra031555	gene:Bra031555	-	A09:35845300-35846742	DB-control	PP5_OX	OK	109.944	98.4961	-0.158636	-1.34403	0.0204	0.0312013	yes
gene:Bra001444	gene:Bra001444	-	A03:16404407-16405595	DB-control	PP5_OX	OK	76.2905	79.2018	0.0540286	0.442882	0.4492	0.506336	no
gene:Bra001445	gene:Bra001445	-	A03:16405935-16407088	DB-control	PP5_OX	OK	1.83049	2.36694	0.370794	0.893752	0.1198	0.157262	no
gene:Bra001446	gene:Bra001446	-	A03:16407363-16412290	DB-control	PP5_OX	OK	1.2075	1.47935	0.292944	1.1455	0.0459	0.0656593	no
gene:Bra002521	gene:Bra002521	-	A10:9066397-9069094	DB-control	PP5_OX	OK	2.70236	3.19128	0.239912	1.38031	0.02035	0.031132	yes
gene:Bra034430	gene:Bra034430	-	A05:13896796-13897854	DB-control	PP5_OX	OK	41.7183	37.964	-0.136046	-1.3352	0.02035	0.031132	yes
gene:Bra001449	gene:Bra001449	-	A03:16417052-16418278	DB-control	PP5_OX	OK	3.16145	0.164752	-4.26222	-3.44957	0.04575	0.065459	no
gene:Bra008377	gene:Bra008377	-	A02:15176851-15178245	DB-control	PP5_OX	OK	4.24169	5.53791	0.384703	1.37562	0.02025	0.0309827	yes
gene:Bra024333	gene:Bra024333	-	A06:15030852-15032510	DB-control	PP5_OX	OK	1.32305	1.83594	0.47265	1.35605	0.02025	0.0309827	yes
gene:Bra001452	gene:Bra001452	-	A03:16422892-16423081	DB-control	PP5_OX	NOTEST	0	0	0	0	1	1	no
gene:Bra036884	gene:Bra036884	-	A01:12403268-12404633	DB-control	PP5_OX	OK	172.693	191.715	0.150754	1.34184	0.02025	0.0309827	yes
gene:Bra040341	gene:Bra040341	-	A08:5949063-5952370	DB-control	PP5_OX	OK	109.133	98.5931	-0.146531	-1.33137	0.02025	0.0309827	yes
gene:Bra001455	gene:Bra001455	-	A03:16448470-16449749	DB-control	PP5_OX	OK	16.5378	16.5446	0.000587066	0.00333877	0.98665	0.987666	no
gene:Bra001456	gene:Bra001456	-	A03:16450648-16453499	DB-control	PP5_OX	NOTEST	0	0	0	0	1	1	no
gene:Bra005750	gene:Bra005750	-	A03:427235-428605	DB-control	PP5_OX	OK	4.37173	5.81737	0.412163	1.38869	0.0202	0.0309134	yes
gene:Bra001458	gene:Bra001458	-	A03:16460694-16467231	DB-control	PP5_OX	NOTEST	0.539294	0.505144	-0.0943751	0	1	1	no
gene:Bra025964	gene:Bra025964	-	A06:6725564-6727589	DB-control	PP5_OX	OK	17.3004	15.7091	-0.139204	-1.37017	0.0202	0.0309134	yes
gene:Bra001460	gene:Bra001460	-	A03:16470618-16471737	DB-control	PP5_OX	OK	67.8657	73.9694	0.124244	1.07389	0.0622	0.0867779	no
gene:Bra001461	gene:Bra001461	-	A03:16477409-16477889	DB-control	PP5_OX	OK	94.6384	100.569	0.0876896	0.954128	0.09665	0.129495	no
gene:Bra027628	gene:Bra027628	-	A09:7282903-7283974	DB-control	PP5_OX	OK	5.78846	3.79045	-0.61081	-1.37248	0.0202	0.0309134	yes
gene:Bra038774	gene:Bra038774	-	A03:24132508-24133765	DB-control	PP5_OX	OK	0.758386	0.348378	-1.12228	-1.33663	0.0202	0.0309134	yes
gene:Bra001464	gene:Bra001464	-	A03:16485939-16486731	DB-control	PP5_OX	NOTEST	0	0	0	0	1	1	no
gene:Bra001465	gene:Bra001465	-	A03:16487716-16488523	DB-control	PP5_OX	NOTEST	0	0	0	0	1	1	no
gene:Bra040236	gene:Bra040236	-	A01:28260694-28261750	DB-control	PP5_OX	OK	14.8159	17.5964	0.248134	1.33662	0.0202	0.0309134	yes
gene:Bra011669	gene:Bra011669	-	A01:1151089-1153431	DB-control	PP5_OX	OK	11.5839	10.2662	-0.174213	-1.34403	0.02015	0.0308458	yes
gene:Bra001468	gene:Bra001468	-	A03:16504930-16506661	DB-control	PP5_OX	OK	12.7523	13.1066	0.0395304	0.215264	0.7119	0.753206	no
gene:Bra001469	gene:Bra001469	-	A03:16508109-16509234	DB-control	PP5_OX	NOTEST	0	0	0	0	1	1	no
gene:Bra001470	gene:Bra001470	-	A03:16509416-16511945	DB-control	PP5_OX	OK	758.028	723.519	-0.0672205	-0.628749	0.27515	0.329122	no
gene:Bra001471	gene:Bra001471	-	A03:16512925-16514316	DB-control	PP5_OX	OK	73.4613	77.5079	0.0773598	0.654815	0.25415	0.306657	no
gene:Bra001472	gene:Bra001472	-	A03:16515344-16516804	DB-control	PP5_OX	NOTEST	0	0	0	0	1	1	no
gene:Bra035071	gene:Bra035071	-	A07:22029512-22031075	DB-control	PP5_OX	OK	11.5177	15.0083	0.381908	1.34614	0.02015	0.0308458	yes
gene:Bra000619	gene:Bra000619	-	A03:12093063-12096073	DB-control	PP5_OX	OK	26.9193	29.1965	0.117157	1.36622	0.0201	0.0307729	yes
gene:Bra001475	gene:Bra001475	-	A03:16536049-16537448	DB-control	PP5_OX	OK	0.807942	1.44017	0.833912	1.2603	0.0366	0.0534983	no
gene:Bra001476	gene:Bra001476	-	A03:16546301-16549312	DB-control	PP5_OX	NOTEST	0.0506521	0.0173516	-1.54555	0	1	1	no
gene:Bra030308	gene:Bra030308	-	A04:9214148-9215099	DB-control	PP5_OX	OK	11.1897	13.1234	0.229974	1.34783	0.0201	0.0307729	yes
gene:Bra001478	gene:Bra001478	-	A03:16580278-16581301	DB-control	PP5_OX	NOTEST	0.222976	0.145197	-0.61887	0	1	1	no
gene:Bra001479	gene:Bra001479	-	A03:16592499-16593119	DB-control	PP5_OX	NOTEST	0	0	0	0	1	1	no
gene:Bra001480	gene:Bra001480	-	A03:16601771-16603851	DB-control	PP5_OX	OK	2.81745	3.17357	0.171718	0.481237	0.411	0.468222	no
gene:Bra040243	gene:Bra040243	-	A01:28288410-28289494	DB-control	PP5_OX	OK	1.36613	0.680579	-1.00526	-1.3013	0.0201	0.0307729	yes
gene:Bra001482	gene:Bra001482	-	A03:16612823-16615376	DB-control	PP5_OX	OK	29.2963	29.9396	0.0313369	0.307614	0.59265	0.643608	no
gene:Bra001483	gene:Bra001483	-	A03:16619939-16621217	DB-control	PP5_OX	NOTEST	0	0	0	0	1	1	no
gene:Bra000822	gene:Bra000822	-	A03:13352553-13354269	DB-control	PP5_OX	OK	3.41247	2.57549	-0.405967	-1.37565	0.02005	0.0307017	yes
gene:Bra008304	gene:Bra008304	-	A02:14604503-14605934	DB-control	PP5_OX	OK	2.12116	2.76076	0.380213	1.36743	0.02005	0.0307017	yes
gene:Bra009745	gene:Bra009745	-	A06:16979003-16987827	DB-control	PP5_OX	OK	1.05182	1.28465	0.288482	1.35305	0.02005	0.0307017	yes
gene:Bra011575	gene:Bra011575	-	A01:1614652-1615283	DB-control	PP5_OX	OK	6.74679	4.51893	-0.57822	-1.34778	0.02005	0.0307017	yes
gene:Bra030293	gene:Bra030293	-	A04:9306643-9307189	DB-control	PP5_OX	OK	0.855361	2.10717	1.3007	1.78929	0.02005	0.0307017	yes
gene:Bra008780	gene:Bra008780	-	A10:13814412-13816189	DB-control	PP5_OX	OK	1.66846	2.41779	0.53517	1.39758	0.02	0.0306341	yes
gene:Bra020397	gene:Bra020397	-	A02:6545786-6546842	DB-control	PP5_OX	OK	1.15136	1.76792	0.618714	1.41124	0.02	0.0306341	yes
gene:Bra001491	gene:Bra001491	-	A03:16659728-16660211	DB-control	PP5_OX	NOTEST	0.0735626	0.0503465	-0.547082	0	1	1	no
gene:Bra031405	gene:Bra031405	-	A01:17751585-17752137	DB-control	PP5_OX	OK	2.1038	4.30336	1.03247	1.33928	0.02	0.0306341	yes
gene:Bra001493	gene:Bra001493	-	A03:16666091-16666415	DB-control	PP5_OX	NOTEST	0	0	0	0	1	1	no
gene:Bra001494	gene:Bra001494	-	A03:16667592-16667943	DB-control	PP5_OX	NOTEST	0.128229	0.482579	1.91204	0	1	1	no
gene:Bra001495	gene:Bra001495	-	A03:16668777-16669653	DB-control	PP5_OX	NOTEST	0.0533306	0	#NAME?	0	1	1	no
gene:Bra001496	gene:Bra001496	-	A03:16670477-16674486	DB-control	PP5_OX	OK	17.1472	17.51	0.030205	0.293228	0.6089	0.658613	no
gene:Bra031816	gene:Bra031816	-	A02:27754810-27761480	DB-control	PP5_OX	OK	2.39225	1.64792	-0.537718	-1.3505	0.02	0.0306341	yes
gene:Bra001498	gene:Bra001498	-	A03:16680092-16684445	DB-control	PP5_OX	NOTEST	0.0201487	0.0210035	0.0599428	0	1	1	no
gene:Bra010336	gene:Bra010336	-	A08:13937407-13939021	DB-control	PP5_OX	OK	0.612989	0.292921	-1.06535	-1.44513	0.01995	0.0305646	yes
gene:Bra014386	gene:Bra014386	-	A04:263857-264835	DB-control	PP5_OX	OK	27.5045	32.9576	0.260941	1.37485	0.01995	0.0305646	yes
gene:Bra016597	gene:Bra016597	-	A08:19214347-19214905	DB-control	PP5_OX	OK	1.59296	2.76955	0.797946	1.41608	0.01995	0.0305646	yes
gene:Bra034532	gene:Bra034532	-	A08:13009272-13011164	DB-control	PP5_OX	OK	6.99193	8.61739	0.301559	1.37028	0.01995	0.0305646	yes
gene:Bra001503	gene:Bra001503	-	A03:16708349-16710335	DB-control	PP5_OX	NOTEST	0	0.0209213	inf	0	1	1	no
gene:Bra001504	gene:Bra001504	-	A03:16712582-16715107	DB-control	PP5_OX	NOTEST	0	0.157854	inf	0	1	1	no
gene:Bra039003	gene:Bra039003	-	A07:880771-883856	DB-control	PP5_OX	OK	15.236	16.9162	0.150922	1.35279	0.01995	0.0305646	yes
gene:Bra001780	gene:Bra001780	-	A03:18405340-18406585	DB-control	PP5_OX	OK	1.17464	0.556349	-1.07815	-1.39084	0.0199	0.0304969	yes
gene:Bra007657	gene:Bra007657	-	A09:30292991-30295214	DB-control	PP5_OX	OK	19.0543	21.1376	0.149697	1.36083	0.0199	0.0304969	yes
gene:Bra001508	gene:Bra001508	-	A03:16748406-16748917	DB-control	PP5_OX	OK	5.79952	2.90814	-0.995836	-1.00928	0.08115	0.110589	no
gene:Bra001509	gene:Bra001509	-	A03:16749571-16752427	DB-control	PP5_OX	NOTEST	0.112241	0.116266	0.0508277	0	1	1	no
gene:Bra001510	gene:Bra001510	-	A03:16756892-16764283	DB-control	PP5_OX	OK	16.3985	15.1064	-0.118408	-1.01271	0.08225	0.111949	no
gene:Bra001511	gene:Bra001511	-	A03:16765783-16766779	DB-control	PP5_OX	NOTEST	0	0	0	0	1	1	no
gene:Bra001512	gene:Bra001512	-	A03:16781767-16783896	DB-control	PP5_OX	NOTEST	0.213986	0.163042	-0.392269	0	1	1	no
gene:Bra001513	gene:Bra001513	-	A03:16785342-16787096	DB-control	PP5_OX	NOTEST	0	0	0	0	1	1	no
gene:Bra001514	gene:Bra001514	-	A03:16790290-16792159	DB-control	PP5_OX	NOTEST	0	0	0	0	1	1	no
gene:Bra001515	gene:Bra001515	-	A03:16793198-16795864	DB-control	PP5_OX	NOTEST	0.0378262	0.111449	1.55893	0	1	1	no
gene:Bra019786	gene:Bra019786	-	A06:4407495-4409148	DB-control	PP5_OX	OK	2.66777	1.79554	-0.571216	-1.36282	0.0199	0.0304969	yes
gene:Bra001517	gene:Bra001517	-	A03:16805350-16807591	DB-control	PP5_OX	NOTEST	0	0	0	0	1	1	no
gene:Bra036915	gene:Bra036915	-	A01:12108247-12110609	DB-control	PP5_OX	OK	1.08935	0.226526	-2.26573	-2.43983	0.0199	0.0304969	yes
gene:Bra001519	gene:Bra001519	-	A03:16812373-16813156	DB-control	PP5_OX	OK	0.0343268	0.658636	4.26207	0.996645	0.1288	0.167726	no
gene:Bra006305	gene:Bra006305	-	A03:2935602-2937097	DB-control	PP5_OX	OK	1.55275	0.756259	-1.03787	-1.40638	0.01985	0.0304274	yes
gene:Bra001521	gene:Bra001521	-	A03:16830510-16833195	DB-control	PP5_OX	OK	5.84569	5.90125	0.0136478	0.0869936	0.8788	0.89879	no
gene:Bra010258	gene:Bra010258	-	A08:13471765-13476226	DB-control	PP5_OX	OK	0.598701	0.362496	-0.723872	-1.39018	0.01985	0.0304274	yes
gene:Bra001523	gene:Bra001523	-	A03:16840952-16843408	DB-control	PP5_OX	OK	4.5779	4.79837	0.0678591	0.346397	0.53975	0.593673	no
gene:Bra001524	gene:Bra001524	-	A03:16848832-16852153	DB-control	PP5_OX	OK	18.4824	17.4472	-0.0831544	-0.887923	0.1266	0.165255	no
gene:Bra027450	gene:Bra027450	-	A09:14238953-14242422	DB-control	PP5_OX	OK	0.844492	0.587604	-0.523239	-1.3904	0.01985	0.0304274	yes
gene:Bra001526	gene:Bra001526	-	A03:16861271-16862835	DB-control	PP5_OX	OK	8.40097	7.7959	-0.10784	-0.311461	0.5954	0.646167	no
gene:Bra001527	gene:Bra001527	-	A03:16865186-16865369	DB-control	PP5_OX	NOTEST	0	0	0	0	1	1	no
gene:Bra001528	gene:Bra001528	-	A03:16873344-16873653	DB-control	PP5_OX	OK	11.9145	10.7256	-0.151665	-0.373741	0.5245	0.579302	no
gene:Bra001529	gene:Bra001529	-	A03:16875419-16876061	DB-control	PP5_OX	NOTEST	0.144972	0.184308	0.346343	0	1	1	no
gene:Bra002805	gene:Bra002805	-	A10:7480443-7482165	DB-control	PP5_OX	OK	14.442	12.9492	-0.157412	-1.33055	0.0198	0.0303561	yes
gene:Bra010431	gene:Bra010431	-	A08:14489816-14492885	DB-control	PP5_OX	OK	16.187	14.7204	-0.137026	-1.3699	0.0198	0.0303561	yes
gene:Bra011030	gene:Bra011030	-	A01:4341747-4346975	DB-control	PP5_OX	OK	24.9874	27.8208	0.154968	1.33521	0.0198	0.0303561	yes
gene:Bra011540	gene:Bra011540	-	A01:1767347-1768780	DB-control	PP5_OX	OK	31.4391	28.712	-0.130909	-1.3529	0.0198	0.0303561	yes
gene:Bra026095	gene:Bra026095	-	A06:6167666-6168900	DB-control	PP5_OX	OK	15.1071	17.674	0.226399	1.34591	0.0198	0.0303561	yes
gene:Bra030693	gene:Bra030693	-	A08:20777513-20779479	DB-control	PP5_OX	OK	1.90135	1.38047	-0.461864	-1.3794	0.0198	0.0303561	yes
gene:Bra036118	gene:Bra036118	-	A09:2632544-2634569	DB-control	PP5_OX	OK	0.751714	1.17247	0.641297	1.34566	0.0198	0.0303561	yes
gene:Bra013846	gene:Bra013846	-	A01:8046571-8046979	DB-control	PP5_OX	OK	301.942	339.612	0.169613	1.36549	0.01975	0.0302918	yes
gene:Bra001538	gene:Bra001538	-	A03:16915770-16917508	DB-control	PP5_OX	OK	5.08794	4.60511	-0.143846	-0.446035	0.44415	0.501181	no
gene:Bra023311	gene:Bra023311	-	A02:2782196-2784994	DB-control	PP5_OX	OK	15.4325	13.7159	-0.170117	-1.36372	0.01975	0.0302918	yes
gene:Bra001540	gene:Bra001540	-	A03:16921903-16922503	DB-control	PP5_OX	NOTEST	0	0	0	0	1	1	no
gene:Bra030115	gene:Bra030115	-	A07:6457786-6458314	DB-control	PP5_OX	OK	2.53157	1.21905	-1.05427	-1.47765	0.01975	0.0302918	yes
gene:Bra018343	gene:Bra018343	-	A05:7605307-7607188	DB-control	PP5_OX	OK	10.1126	8.636	-0.227722	-1.34602	0.0197	0.0302204	yes
gene:Bra001543	gene:Bra001543	-	A03:16932912-16933933	DB-control	PP5_OX	NOTEST	0	0	0	0	1	1	no
gene:Bra001544	gene:Bra001544	-	A03:16935191-16935931	DB-control	PP5_OX	NOTEST	0	0	0	0	1	1	no
gene:Bra002894	gene:Bra002894	-	A10:6908009-6909449	DB-control	PP5_OX	OK	0.116162	0.617004	2.40914	1.99114	0.01965	0.0301455	yes
gene:Bra001546	gene:Bra001546	-	A03:16954009-16956382	DB-control	PP5_OX	NOTEST	0	0	0	0	1	1	no
gene:Bra025938	gene:Bra025938	-	A06:6873825-6876631	DB-control	PP5_OX	OK	2.63854	3.22416	0.289183	1.3303	0.01965	0.0301455	yes
gene:Bra010628	gene:Bra010628	-	A08:15677650-15678916	DB-control	PP5_OX	OK	1.65689	2.29729	0.471455	1.38538	0.0196	0.0300723	yes
gene:Bra027732	gene:Bra027732	-	A09:6586492-6588581	DB-control	PP5_OX	OK	11.7481	10.0735	-0.221864	-1.3391	0.0196	0.0300723	yes
gene:Bra028589	gene:Bra028589	-	A02:1180205-1183710	DB-control	PP5_OX	OK	4.95328	3.92822	-0.33451	-1.3968	0.01955	0.0299991	yes
gene:Bra001551	gene:Bra001551	-	A03:16990784-16992815	DB-control	PP5_OX	OK	137.353	134.232	-0.0331647	-0.298782	0.60315	0.653363	no
gene:Bra032991	gene:Bra032991	-	A02:22048147-22049768	DB-control	PP5_OX	OK	83.438	74.6586	-0.160397	-1.36379	0.01955	0.0299991	yes
gene:Bra001553	gene:Bra001553	-	A03:17012525-17012795	DB-control	PP5_OX	NOTEST	0	0	0	0	1	1	no
gene:Bra040447	gene:Bra040447	-	A04:82506-85375	DB-control	PP5_OX	OK	30.9148	34.3938	0.153853	1.38077	0.01955	0.0299991	yes
gene:Bra001555	gene:Bra001555	-	A03:17039486-17043876	DB-control	PP5_OX	NOTEST	0	0	0	0	1	1	no
gene:Bra001556	gene:Bra001556	-	A03:17044478-17045838	DB-control	PP5_OX	NOTEST	0	0	0	0	1	1	no
gene:Bra001557	gene:Bra001557	-	A03:17046660-17048968	DB-control	PP5_OX	NOTEST	0	0	0	0	1	1	no
gene:Bra001558	gene:Bra001558	-	A03:17051451-17052662	DB-control	PP5_OX	NOTEST	0	0	0	0	1	1	no
gene:Bra014799	gene:Bra014799	-	A04:3226216-3227416	DB-control	PP5_OX	OK	34.5216	31.4489	-0.134493	-1.37816	0.0195	0.0299276	yes
gene:Bra001560	gene:Bra001560	-	A03:17062778-17065204	DB-control	PP5_OX	NOTEST	0.156	0	#NAME?	0	1	1	no
gene:Bra001561	gene:Bra001561	-	A03:17066432-17068159	DB-control	PP5_OX	NOTEST	0.0155701	0	#NAME?	0	1	1	no
gene:Bra001562	gene:Bra001562	-	A03:17068783-17070993	DB-control	PP5_OX	NOTEST	0	0	0	0	1	1	no
gene:Bra003217	gene:Bra003217	-	A07:11943287-11944184	DB-control	PP5_OX	OK	4.71163	3.53797	-0.413306	-1.38101	0.01945	0.0298526	yes
gene:Bra001564	gene:Bra001564	-	A03:17074759-17076321	DB-control	PP5_OX	OK	2.86449	2.47027	-0.213609	-0.645275	0.26985	0.32346	no
gene:Bra023164	gene:Bra023164	-	A09:21075773-21076043	DB-control	PP5_OX	OK	19.5124	26.8684	0.461515	1.35641	0.01945	0.0298526	yes
gene:Bra001566	gene:Bra001566	-	A03:17092802-17099718	DB-control	PP5_OX	OK	14.1635	15.1176	0.094058	1.19965	0.03765	0.0548803	no
gene:Bra001567	gene:Bra001567	-	A03:17101788-17107740	DB-control	PP5_OX	NOTEST	0.00791552	0.00704747	-0.167578	0	1	1	no
gene:Bra001568	gene:Bra001568	-	A03:17116088-17116482	DB-control	PP5_OX	OK	3.51796	0.867681	-2.0195	-1.49436	0.11275	0.148878	no
gene:Bra016051	gene:Bra016051	-	A07:19674076-19674873	DB-control	PP5_OX	OK	2.27257	1.04272	-1.12397	-1.46522	0.0194	0.0297793	yes
gene:Bra032998	gene:Bra032998	-	A02:21998825-22003125	DB-control	PP5_OX	OK	6.30588	6.9232	0.134742	1.35262	0.0194	0.0297793	yes
gene:Bra001571	gene:Bra001571	-	A03:17137026-17138346	DB-control	PP5_OX	NOTEST	0.193548	0.513261	1.407	0	1	1	no
gene:Bra000416	gene:Bra000416	-	A03:11003300-11005164	DB-control	PP5_OX	OK	2.10105	1.35245	-0.635536	-1.36857	0.01935	0.0297061	yes
gene:Bra010941	gene:Bra010941	-	A08:17217100-17217585	DB-control	PP5_OX	OK	67.815	53.4792	-0.342625	-1.38854	0.01935	0.0297061	yes
gene:Bra001574	gene:Bra001574	-	A03:17146075-17146478	DB-control	PP5_OX	NOTEST	0	0	0	0	1	1	no
gene:Bra001575	gene:Bra001575	-	A03:17149579-17154147	DB-control	PP5_OX	OK	0.72907	0.779409	0.0963249	0.27307	0.64145	0.688996	no
gene:Bra011510	gene:Bra011510	-	A01:1880959-1882770	DB-control	PP5_OX	OK	0.740511	0.325579	-1.18551	-1.4432	0.01935	0.0297061	yes
gene:Bra019293	gene:Bra019293	-	A03:25158762-25161006	DB-control	PP5_OX	OK	0.133261	0.700516	2.39416	1.89349	0.01935	0.0297061	yes
gene:Bra026183	gene:Bra026183	-	A06:5699278-5705395	DB-control	PP5_OX	OK	6.96091	7.57755	0.122456	1.3375	0.01935	0.0297061	yes
gene:Bra039611	gene:Bra039611	-	A07:1438704-1440484	DB-control	PP5_OX	OK	5.24367	6.44854	0.298395	1.3689	0.01935	0.0297061	yes
gene:Bra015434	gene:Bra015434	-	A10:1792961-1794076	DB-control	PP5_OX	OK	1.85042	2.62914	0.506737	1.37804	0.0193	0.0296397	yes
gene:Bra027641	gene:Bra027641	-	A09:7187037-7193898	DB-control	PP5_OX	OK	4.89981	5.47361	0.159768	1.34692	0.0193	0.0296397	yes
gene:Bra001582	gene:Bra001582	-	A03:17181500-17183167	DB-control	PP5_OX	OK	10.9848	10.2731	-0.0966383	-0.656448	0.25185	0.304189	no
gene:Bra001583	gene:Bra001583	-	A03:17190629-17192522	DB-control	PP5_OX	OK	10.7706	9.92617	-0.117783	-0.721753	0.2137	0.263418	no
gene:Bra029713	gene:Bra029713	-	A05:22551723-22553415	DB-control	PP5_OX	OK	17.1892	18.9299	0.139167	1.37327	0.0193	0.0296397	yes
gene:Bra001585	gene:Bra001585	-	A03:17206005-17209046	DB-control	PP5_OX	OK	12.0812	11.9138	-0.0201228	-0.169282	0.76745	0.802217	no
gene:Bra001586	gene:Bra001586	-	A03:17211160-17212718	DB-control	PP5_OX	NOTEST	0.116686	0.36381	1.64056	0	1	1	no
gene:Bra033553	gene:Bra033553	-	A06:26264975-26266006	DB-control	PP5_OX	OK	4.23708	5.48073	0.371297	1.3821	0.0193	0.0296397	yes
gene:Bra037791	gene:Bra037791	-	A09:3582532-3584535	DB-control	PP5_OX	OK	4.32326	5.46904	0.339168	1.37393	0.0193	0.0296397	yes
gene:Bra001589	gene:Bra001589	-	A03:17227449-17229160	DB-control	PP5_OX	NOTEST	0	0	0	0	1	1	no
gene:Bra001590	gene:Bra001590	-	A03:17233845-17236114	DB-control	PP5_OX	NOTEST	0.0788533	0.24632	1.64329	0	1	1	no
gene:Bra001591	gene:Bra001591	-	A03:17239372-17241429	DB-control	PP5_OX	NOTEST	0.264372	0.323471	0.291064	0	1	1	no
gene:Bra022368	gene:Bra022368	-	A05:18134083-18134597	DB-control	PP5_OX	OK	19.9258	14.9319	-0.416241	-1.39739	0.01925	0.0295715	yes
gene:Bra001593	gene:Bra001593	-	A03:17249469-17250586	DB-control	PP5_OX	NOTEST	0.0268085	0	#NAME?	0	1	1	no
gene:Bra016217	gene:Bra016217	-	A07:18828635-18829133	DB-control	PP5_OX	OK	5.44394	7.67111	0.494783	1.39342	0.0192	0.0294965	yes
gene:Bra025024	gene:Bra025024	-	A06:24745795-24746011	DB-control	PP5_OX	OK	4.9038	1.03718	-2.24124	-1.74156	0.0192	0.0294965	yes
gene:Bra001596	gene:Bra001596	-	A03:17260948-17262007	DB-control	PP5_OX	NOTEST	0.13693	0.128915	-0.087022	0	1	1	no
gene:Bra001597	gene:Bra001597	-	A03:17280838-17282575	DB-control	PP5_OX	NOTEST	0.354189	0.0532961	-2.73242	0	1	1	no
gene:Bra025982	gene:Bra025982	-	A06:6646438-6650985	DB-control	PP5_OX	OK	29.1022	26.1009	-0.157029	-1.36277	0.0192	0.0294965	yes
gene:Bra033858	gene:Bra033858	-	A05:14558890-14562851	DB-control	PP5_OX	OK	17.713	16.3813	-0.112766	-1.36397	0.0192	0.0294965	yes
gene:Bra001600	gene:Bra001600	-	A03:17301323-17301659	DB-control	PP5_OX	OK	170.767	171.13	0.00305972	0.0321609	0.9589	0.964446	no
gene:Bra001601	gene:Bra001601	-	A03:17311941-17317306	DB-control	PP5_OX	NOTEST	0	0.0979844	inf	0	1	1	no
gene:Bra001602	gene:Bra001602	-	A03:17326682-17328289	DB-control	PP5_OX	OK	3.5712	4.20729	0.236484	0.727908	0.2192	0.269565	no
gene:Bra001603	gene:Bra001603	-	A03:17329238-17329948	DB-control	PP5_OX	NOTEST	0	0	0	0	1	1	no
gene:Bra039914	gene:Bra039914	-	A07:1687416-1688971	DB-control	PP5_OX	OK	92.6494	82.9641	-0.159295	-1.34414	0.0192	0.0294965	yes
gene:Bra001605	gene:Bra001605	-	A03:17344871-17347141	DB-control	PP5_OX	NOTEST	0	0	0	0	1	1	no
gene:Bra006299	gene:Bra006299	-	A03:2918035-2919017	DB-control	PP5_OX	OK	6.24672	4.91741	-0.3452	-1.35306	0.01915	0.0294283	yes
gene:Bra007133	gene:Bra007133	-	A09:27487565-27488468	DB-control	PP5_OX	OK	0.632652	1.59652	1.33544	1.39151	0.01915	0.0294283	yes
gene:Bra001608	gene:Bra001608	-	A03:17374204-17375798	DB-control	PP5_OX	OK	502.363	509.239	0.0196115	0.182401	0.7498	0.786398	no
gene:Bra001609	gene:Bra001609	-	A03:17376314-17377972	DB-control	PP5_OX	NOTEST	0	0	0	0	1	1	no
gene:Bra001610	gene:Bra001610	-	A03:17382316-17384064	DB-control	PP5_OX	NOTEST	0	0	0	0	1	1	no
gene:Bra001611	gene:Bra001611	-	A03:17386148-17388446	DB-control	PP5_OX	NOTEST	0.0248201	0.132848	2.4202	0	1	1	no
gene:Bra001612	gene:Bra001612	-	A03:17393546-17397144	DB-control	PP5_OX	NOTEST	0	0	0	0	1	1	no
gene:Bra008939	gene:Bra008939	-	A10:14494018-14495356	DB-control	PP5_OX	OK	2.45299	1.48018	-0.728765	-1.38494	0.01915	0.0294283	yes
gene:Bra001614	gene:Bra001614	-	A03:17407899-17409569	DB-control	PP5_OX	OK	12.2635	12.5541	0.0337888	0.226843	0.69505	0.737906	no
gene:Bra024418	gene:Bra024418	-	A06:15658331-15671875	DB-control	PP5_OX	OK	9.32903	8.43913	-0.144633	-1.34935	0.01915	0.0294283	yes
gene:Bra029148	gene:Bra029148	-	A03:6573532-6574699	DB-control	PP5_OX	OK	8.74942	10.1155	0.209308	1.38692	0.01915	0.0294283	yes
gene:Bra001617	gene:Bra001617	-	A03:17434241-17438037	DB-control	PP5_OX	NOTEST	0.035986	0.0921924	1.35721	0	1	1	no
gene:Bra038165	gene:Bra038165	-	Scaffold000140:285096-286017	DB-control	PP5_OX	OK	25.0712	21.4027	-0.228238	-1.35857	0.01915	0.0294283	yes
gene:Bra001619	gene:Bra001619	-	A03:17444724-17445553	DB-control	PP5_OX	NOTEST	0.0696018	0	#NAME?	0	1	1	no
gene:Bra001620	gene:Bra001620	-	A03:17448559-17448922	DB-control	PP5_OX	NOTEST	0	0	0	0	1	1	no
gene:Bra001621	gene:Bra001621	-	A03:17459667-17461461	DB-control	PP5_OX	NOTEST	0	0	0	0	1	1	no
gene:Bra001622	gene:Bra001622	-	A03:17465533-17466118	DB-control	PP5_OX	NOTEST	0	0	0	0	1	1	no
gene:Bra001623	gene:Bra001623	-	A03:17481476-17482230	DB-control	PP5_OX	NOTEST	0.15912	0	#NAME?	0	1	1	no
gene:Bra040433	gene:Bra040433	-	A04:14202-15827	DB-control	PP5_OX	OK	363.246	328.544	-0.144862	-1.34522	0.01915	0.0294283	yes
gene:Bra001625	gene:Bra001625	-	A03:17495005-17495641	DB-control	PP5_OX	NOTEST	0.418036	0.0674823	-2.63105	0	1	1	no
gene:Bra015191	gene:Bra015191	-	A10:3733177-3746592	DB-control	PP5_OX	OK	19.6365	21.472	0.128914	1.36178	0.0191	0.0293635	yes
gene:Bra001627	gene:Bra001627	-	A03:17515596-17516292	DB-control	PP5_OX	NOTEST	0	0	0	0	1	1	no
gene:Bra016837	gene:Bra016837	-	A08:20209854-20210738	DB-control	PP5_OX	OK	14.4989	12.0754	-0.263872	-1.35432	0.0191	0.0293635	yes
gene:Bra001629	gene:Bra001629	-	A03:17540177-17541235	DB-control	PP5_OX	NOTEST	0.16537	0.411976	1.31686	0	1	1	no
gene:Bra001630	gene:Bra001630	-	A03:17544436-17548484	DB-control	PP5_OX	NOTEST	0	0	0	0	1	1	no
gene:Bra019572	gene:Bra019572	-	A06:12098111-12099311	DB-control	PP5_OX	OK	47.7128	52.8461	0.14742	1.37308	0.0191	0.0293635	yes
gene:Bra001632	gene:Bra001632	-	A03:17565295-17566601	DB-control	PP5_OX	OK	1.1606	1.27957	0.140793	0.228897	0.69505	0.737906	no
gene:Bra001633	gene:Bra001633	-	A03:17572926-17574320	DB-control	PP5_OX	OK	0.952364	0.743624	-0.356939	-0.635467	0.2798	0.333984	no
gene:Bra033709	gene:Bra033709	-	A06:25490293-25491689	DB-control	PP5_OX	OK	2.60883	3.5832	0.457847	1.39638	0.0191	0.0293635	yes
gene:Bra024971	gene:Bra024971	-	A06:24470908-24478165	DB-control	PP5_OX	OK	8.81367	9.52033	0.111269	1.35983	0.01905	0.0292934	yes
gene:Bra025946	gene:Bra025946	-	A06:6850163-6853161	DB-control	PP5_OX	OK	4.91354	5.64124	0.199248	1.36032	0.01905	0.0292934	yes
gene:Bra001637	gene:Bra001637	-	A03:17623063-17624110	DB-control	PP5_OX	OK	472.82	484.046	0.0338531	0.31209	0.5876	0.639076	no
gene:Bra001638	gene:Bra001638	-	A03:17625984-17627579	DB-control	PP5_OX	NOTEST	0.0412352	0	#NAME?	0	1	1	no
gene:Bra041069	gene:Bra041069	-	Scaffold000450:2412-3694	DB-control	PP5_OX	OK	5.69051	7.8706	0.467916	1.38927	0.01905	0.0292934	yes
gene:Bra021797	gene:Bra021797	-	A04:14541079-14546321	DB-control	PP5_OX	OK	22.7839	20.6241	-0.143679	-1.42448	0.019	0.0292217	yes
gene:Bra001641	gene:Bra001641	-	A03:17643541-17644313	DB-control	PP5_OX	OK	0.714242	0.849705	0.250549	0.195155	0.73895	0.777004	no
gene:Bra030598	gene:Bra030598	-	A08:21158858-21162542	DB-control	PP5_OX	OK	4.13209	4.98521	0.270783	1.35998	0.019	0.0292217	yes
gene:Bra006169	gene:Bra006169	-	A03:2331153-2333151	DB-control	PP5_OX	OK	3.02889	2.30906	-0.391483	-1.35561	0.01895	0.0291482	yes
gene:Bra010119	gene:Bra010119	-	A06:19535168-19536032	DB-control	PP5_OX	OK	10.3684	12.234	0.238706	1.31734	0.01895	0.0291482	yes
gene:Bra014678	gene:Bra014678	-	A04:2180890-2182432	DB-control	PP5_OX	OK	116.289	104.775	-0.150421	-1.33174	0.01895	0.0291482	yes
gene:Bra001646	gene:Bra001646	-	A03:17681803-17682598	DB-control	PP5_OX	OK	23.5894	22.4005	-0.0746129	-0.497517	0.3878	0.444569	no
gene:Bra001647	gene:Bra001647	-	A03:17684104-17685437	DB-control	PP5_OX	NOTEST	0	0	0	0	1	1	no
gene:Bra001648	gene:Bra001648	-	A03:17687142-17688555	DB-control	PP5_OX	NOTEST	0.0940568	0.122095	0.376396	0	1	1	no
gene:Bra001649	gene:Bra001649	-	A03:17688992-17689904	DB-control	PP5_OX	NOTEST	0	0	0	0	1	1	no
gene:Bra001650	gene:Bra001650	-	A03:17690277-17691120	DB-control	PP5_OX	NOTEST	0	0	0	0	1	1	no
gene:Bra001572	gene:Bra001572	-	A03:17139557-17142571	DB-control	PP5_OX	OK	5.62548	4.67995	-0.265483	-1.37893	0.0189	0.0290764	yes
gene:Bra001652	gene:Bra001652	-	A03:17693999-17695425	DB-control	PP5_OX	OK	0.0191965	0.868835	5.50017	1.2032	0.1288	0.167726	no
gene:Bra003886	gene:Bra003886	-	A07:15553138-15555309	DB-control	PP5_OX	OK	1.27744	0.722054	-0.823078	-1.52266	0.0189	0.0290764	yes
gene:Bra019508	gene:Bra019508	-	A06:12716407-12717662	DB-control	PP5_OX	OK	13.2709	11.1987	-0.244943	-1.37183	0.0189	0.0290764	yes
gene:Bra001655	gene:Bra001655	-	A03:17713599-17714151	DB-control	PP5_OX	NOTEST	0.120663	0.0734076	-0.716982	0	1	1	no
gene:Bra001656	gene:Bra001656	-	A03:17715586-17717574	DB-control	PP5_OX	NOTEST	0	0	0	0	1	1	no
gene:Bra001657	gene:Bra001657	-	A03:17720860-17721424	DB-control	PP5_OX	NOTEST	0	0	0	0	1	1	no
gene:Bra001658	gene:Bra001658	-	A03:17728436-17729333	DB-control	PP5_OX	OK	33.4775	35.9653	0.103415	0.385093	0.50345	0.559062	no
gene:Bra001659	gene:Bra001659	-	A03:17729788-17731223	DB-control	PP5_OX	OK	2.31064	1.76423	-0.389253	-0.825656	0.15625	0.199311	no
gene:Bra020760	gene:Bra020760	-	A02:23233065-23234830	DB-control	PP5_OX	OK	51.0057	47.1777	-0.112552	-1.35056	0.0189	0.0290764	yes
gene:Bra001661	gene:Bra001661	-	A03:17734566-17735748	DB-control	PP5_OX	OK	557.855	607.216	0.122321	1.14348	0.04405	0.0633199	no
gene:Bra023411	gene:Bra023411	-	A02:3271825-3273591	DB-control	PP5_OX	OK	14.2455	16.557	0.216935	1.35961	0.01885	0.0290063	yes
gene:Bra001663	gene:Bra001663	-	A03:17745058-17746883	DB-control	PP5_OX	OK	9.32313	10.0057	0.10194	0.539406	0.3536	0.410125	no
gene:Bra001423	gene:Bra001423	-	A03:16302821-16306718	DB-control	PP5_OX	OK	22.6545	20.9269	-0.114438	-1.33152	0.0188	0.028931	yes
gene:Bra002106	gene:Bra002106	-	A10:11418037-11420605	DB-control	PP5_OX	OK	10.7903	11.88	0.138804	1.35724	0.0188	0.028931	yes
gene:Bra001666	gene:Bra001666	-	A03:17761859-17762690	DB-control	PP5_OX	NOTEST	0	0	0	0	1	1	no
gene:Bra001667	gene:Bra001667	-	A03:17766497-17767667	DB-control	PP5_OX	NOTEST	0	0	0	0	1	1	no
gene:Bra001668	gene:Bra001668	-	A03:17771254-17771497	DB-control	PP5_OX	NOTEST	0.30625	0	#NAME?	0	1	1	no
gene:Bra001669	gene:Bra001669	-	A03:17778127-17778373	DB-control	PP5_OX	NOTEST	0	0.651803	inf	0	1	1	no
gene:Bra001670	gene:Bra001670	-	A03:17781234-17782026	DB-control	PP5_OX	NOTEST	0	0	0	0	1	1	no
gene:Bra015572	gene:Bra015572	-	A10:953166-953559	DB-control	PP5_OX	OK	11.7616	8.47102	-0.473481	-1.38608	0.0188	0.028931	yes
gene:Bra001672	gene:Bra001672	-	A03:17788018-17790907	DB-control	PP5_OX	NOTEST	0	0	0	0	1	1	no
gene:Bra001673	gene:Bra001673	-	A03:17792858-17794049	DB-control	PP5_OX	NOTEST	0.284815	0.454036	0.67278	0	1	1	no
gene:Bra019601	gene:Bra019601	-	A06:11843362-11843800	DB-control	PP5_OX	OK	6.2307	4.03617	-0.626405	-1.41338	0.0188	0.028931	yes
gene:Bra001675	gene:Bra001675	-	A03:17799863-17807502	DB-control	PP5_OX	NOTEST	0	0	0	0	1	1	no
gene:Bra038600	gene:Bra038600	-	A06:14091794-14092930	DB-control	PP5_OX	OK	12.92	10.4972	-0.299602	-1.37818	0.0188	0.028931	yes
gene:Bra001677	gene:Bra001677	-	A03:17818025-17819478	DB-control	PP5_OX	OK	0.774985	0.878175	0.180341	0.21422	0.73	0.769072	no
gene:Bra001678	gene:Bra001678	-	A03:17823896-17832047	DB-control	PP5_OX	NOTEST	0	0	0	0	1	1	no
gene:Bra001679	gene:Bra001679	-	A03:17834052-17835174	DB-control	PP5_OX	OK	0.632669	0.557102	-0.183507	-0.270409	0.6392	0.686804	no
gene:Bra001680	gene:Bra001680	-	A03:17839523-17840051	DB-control	PP5_OX	NOTEST	0	0	0	0	1	1	no
gene:Bra001681	gene:Bra001681	-	A03:17841417-17842625	DB-control	PP5_OX	NOTEST	0	0.0890273	inf	0	1	1	no
gene:Bra001682	gene:Bra001682	-	A03:17844406-17845504	DB-control	PP5_OX	NOTEST	0	0	0	0	1	1	no
gene:Bra038715	gene:Bra038715	-	A01:26452813-26453321	DB-control	PP5_OX	OK	3.36368	0.599223	-2.48888	-2.03981	0.0188	0.028931	yes
gene:Bra040544	gene:Bra040544	-	Scaffold000216:68296-71346	DB-control	PP5_OX	OK	0.634113	0.901184	0.507083	1.42609	0.0188	0.028931	yes
gene:Bra003645	gene:Bra003645	-	A07:14219045-14219969	DB-control	PP5_OX	OK	611.024	676.328	0.146494	1.38609	0.01875	0.0288659	yes
gene:Bra005623	gene:Bra005623	-	A05:6587372-6587666	DB-control	PP5_OX	OK	7.08138	1.27332	-2.47544	-2.11555	0.01875	0.0288659	yes
gene:Bra001687	gene:Bra001687	-	A03:17865404-17868285	DB-control	PP5_OX	NOTEST	0	0	0	0	1	1	no
gene:Bra018632	gene:Bra018632	-	A06:2887690-2890372	DB-control	PP5_OX	OK	3.35203	4.08381	0.284882	1.38712	0.01875	0.0288659	yes
gene:Bra001689	gene:Bra001689	-	A03:17872927-17874055	DB-control	PP5_OX	NOTEST	0	0	0	0	1	1	no
gene:Bra001690	gene:Bra001690	-	A03:17874726-17875965	DB-control	PP5_OX	NOTEST	0	0	0	0	1	1	no
gene:Bra001691	gene:Bra001691	-	A03:17877787-17878570	DB-control	PP5_OX	OK	9.46997	10.8129	0.191327	0.826478	0.1483	0.190316	no
gene:Bra040221	gene:Bra040221	-	A01:28182462-28187663	DB-control	PP5_OX	OK	18.2302	20.368	0.159973	1.38768	0.01875	0.0288659	yes
gene:Bra001693	gene:Bra001693	-	A03:17884529-17885240	DB-control	PP5_OX	NOTEST	0	0	0	0	1	1	no
gene:Bra018566	gene:Bra018566	-	A06:3181896-3183404	DB-control	PP5_OX	OK	37.2627	42.212	0.179922	1.36635	0.0187	0.0287957	yes
gene:Bra001695	gene:Bra001695	-	A03:17902937-17903961	DB-control	PP5_OX	OK	25.5256	27.8723	0.126885	0.866452	0.13135	0.170708	no
gene:Bra001696	gene:Bra001696	-	A03:17907538-17909990	DB-control	PP5_OX	NOTEST	0.00870915	0.00928714	0.0927026	0	1	1	no
gene:Bra001983	gene:Bra001983	-	A10:12487631-12488804	DB-control	PP5_OX	OK	19.2456	21.6038	0.166758	1.34998	0.01865	0.0287204	yes
gene:Bra001698	gene:Bra001698	-	A03:17920102-17921695	DB-control	PP5_OX	OK	10.9219	11.0214	0.0130822	0.0836414	0.8887	0.906972	no
gene:Bra001699	gene:Bra001699	-	A03:17922052-17923706	DB-control	PP5_OX	NOTEST	0.0258523	0	#NAME?	0	1	1	no
gene:Bra001700	gene:Bra001700	-	A03:17925472-17927331	DB-control	PP5_OX	OK	16.9823	17.0507	0.00580119	0.0481537	0.93165	0.942889	no
gene:Bra005591	gene:Bra005591	-	A05:6394657-6398235	DB-control	PP5_OX	OK	9.82049	8.90701	-0.140854	-1.36845	0.01865	0.0287204	yes
gene:Bra006227	gene:Bra006227	-	A03:2609589-2615062	DB-control	PP5_OX	OK	32.4985	29.2315	-0.152849	-1.35502	0.01865	0.0287204	yes
gene:Bra015523	gene:Bra015523	-	A10:1259162-1261357	DB-control	PP5_OX	OK	14.501	16.0984	0.150765	1.36975	0.01865	0.0287204	yes
gene:Bra029087	gene:Bra029087	-	A03:6288338-6289944	DB-control	PP5_OX	OK	2.74203	2.11783	-0.37266	-1.47828	0.01865	0.0287204	yes
gene:Bra001705	gene:Bra001705	-	A03:17943523-17945144	DB-control	PP5_OX	NOTEST	0.541101	0.482868	-0.164267	0	1	1	no
gene:Bra001706	gene:Bra001706	-	A03:17946988-17947390	DB-control	PP5_OX	OK	78.2233	83.1667	0.0884078	0.631269	0.2766	0.330555	no
gene:Bra001707	gene:Bra001707	-	A03:17956491-17957991	DB-control	PP5_OX	OK	17.1127	16.6052	-0.0434365	-0.404375	0.48895	0.544873	no
gene:Bra001708	gene:Bra001708	-	A03:17971397-17974761	DB-control	PP5_OX	NOTEST	0.0566096	0.048147	-0.233601	0	1	1	no
gene:Bra030534	gene:Bra030534	-	A08:21432501-21434316	DB-control	PP5_OX	OK	0.834903	0.537473	-0.635418	-1.34165	0.01865	0.0287204	yes
gene:Bra040226	gene:Bra040226	-	A01:28212522-28215169	DB-control	PP5_OX	OK	1.07909	1.62678	0.592208	1.39025	0.01865	0.0287204	yes
gene:Bra001711	gene:Bra001711	-	A03:18004552-18005083	DB-control	PP5_OX	NOTEST	0	0	0	0	1	1	no
gene:Bra001712	gene:Bra001712	-	A03:18006138-18006785	DB-control	PP5_OX	NOTEST	0.039075	0.0528638	0.436036	0	1	1	no
gene:Bra004966	gene:Bra004966	-	A05:2680563-2682949	DB-control	PP5_OX	OK	0.616985	0.214791	-1.5223	-1.84485	0.0186	0.0286552	yes
gene:Bra012367	gene:Bra012367	-	A07:8155320-8156870	DB-control	PP5_OX	OK	13.9759	17.9962	0.364755	1.37914	0.0186	0.0286552	yes
gene:Bra035727	gene:Bra035727	-	A04:12500353-12504200	DB-control	PP5_OX	OK	13.0617	14.4726	0.147982	1.38892	0.0186	0.0286552	yes
gene:Bra027630	gene:Bra027630	-	A09:7275691-7277635	DB-control	PP5_OX	OK	4.14283	2.95426	-0.487818	-1.36902	0.01855	0.0285832	yes
gene:Bra008821	gene:Bra008821	-	A10:13984679-13985740	DB-control	PP5_OX	OK	7.22767	9.45536	0.387603	1.37225	0.0185	0.0285078	yes
gene:Bra010638	gene:Bra010638	-	A08:15729925-15730444	DB-control	PP5_OX	OK	10.7978	7.83595	-0.462555	-1.46565	0.0185	0.0285078	yes
gene:Bra021160	gene:Bra021160	-	A01:23654666-23656197	DB-control	PP5_OX	OK	12.104	14.1507	0.225382	1.37452	0.0185	0.0285078	yes
gene:Bra001720	gene:Bra001720	-	A03:18037427-18038209	DB-control	PP5_OX	OK	25.3587	24.6441	-0.0412375	-0.205806	0.71975	0.760072	no
gene:Bra000990	gene:Bra000990	-	A03:14289934-14293006	DB-control	PP5_OX	OK	2.23329	2.72005	0.284459	1.36082	0.01845	0.0284358	yes
gene:Bra028486	gene:Bra028486	-	A02:628603-629303	DB-control	PP5_OX	OK	0.918966	2.10675	1.19693	1.56509	0.01845	0.0284358	yes
gene:Bra001723	gene:Bra001723	-	A03:18049252-18052324	DB-control	PP5_OX	NOTEST	0	0	0	0	1	1	no
gene:Bra003528	gene:Bra003528	-	A07:13644379-13645670	DB-control	PP5_OX	OK	3.7546	2.80259	-0.421901	-1.37443	0.0184	0.028362	yes
gene:Bra006730	gene:Bra006730	-	A03:4827575-4828509	DB-control	PP5_OX	OK	8.10588	12.5929	0.635564	1.37724	0.01835	0.0282866	yes
gene:Bra001726	gene:Bra001726	-	A03:18066046-18071059	DB-control	PP5_OX	OK	14.4565	14.4207	-0.00357491	-0.0393626	0.94805	0.956024	no
gene:Bra001727	gene:Bra001727	-	A03:18081579-18083192	DB-control	PP5_OX	OK	1.6052	1.043	-0.622018	-1.12159	0.0571	0.080264	no
gene:Bra011481	gene:Bra011481	-	A01:2005946-2008036	DB-control	PP5_OX	OK	1.40656	0.865818	-0.700037	-1.36476	0.01835	0.0282866	yes
gene:Bra032344	gene:Bra032344	-	A09:22405579-22409439	DB-control	PP5_OX	OK	42.7041	38.5087	-0.149188	-1.34625	0.01835	0.0282866	yes
gene:Bra001730	gene:Bra001730	-	A03:18114561-18120053	DB-control	PP5_OX	NOTEST	0	0	0	0	1	1	no
gene:Bra001731	gene:Bra001731	-	A03:18120698-18122274	DB-control	PP5_OX	NOTEST	0.0485523	0.342328	2.81777	0	1	1	no
gene:Bra016502	gene:Bra016502	-	A08:18781598-18783605	DB-control	PP5_OX	OK	66.7526	62.049	-0.105415	-1.36733	0.01825	0.0281374	yes
gene:Bra001733	gene:Bra001733	-	A03:18152353-18155071	DB-control	PP5_OX	NOTEST	0.0188059	0.0158868	-0.243361	0	1	1	no
gene:Bra001734	gene:Bra001734	-	A03:18156689-18162041	DB-control	PP5_OX	NOTEST	0.403161	0.289977	-0.475417	0	1	1	no
gene:Bra024712	gene:Bra024712	-	A09:23384188-23385715	DB-control	PP5_OX	OK	1.92827	2.52633	0.389736	1.40256	0.01825	0.0281374	yes
gene:Bra001736	gene:Bra001736	-	A03:18172965-18173708	DB-control	PP5_OX	OK	3.14525	3.76618	0.25993	0.573231	0.31005	0.365211	no
gene:Bra001737	gene:Bra001737	-	A03:18178109-18179443	DB-control	PP5_OX	NOTEST	0.0279537	0.0635788	1.18551	0	1	1	no
gene:Bra001709	gene:Bra001709	-	A03:17975347-17979260	DB-control	PP5_OX	OK	1.90213	2.31661	0.284403	1.37904	0.01815	0.0279865	yes
gene:Bra001739	gene:Bra001739	-	A03:18189203-18190244	DB-control	PP5_OX	OK	9.11872	10.5193	0.206137	1.19216	0.03865	0.0562069	no
gene:Bra029068	gene:Bra029068	-	A03:6177510-6181598	DB-control	PP5_OX	OK	13.1401	14.527	0.144758	1.48164	0.01815	0.0279865	yes
gene:Bra001741	gene:Bra001741	-	A03:18196627-18198822	DB-control	PP5_OX	NOTEST	0.0382207	0.0131512	-1.53916	0	1	1	no
gene:Bra009447	gene:Bra009447	-	A10:16680342-16682826	DB-control	PP5_OX	OK	10.8456	9.49891	-0.191274	-1.36567	0.0181	0.0279127	yes
gene:Bra001743	gene:Bra001743	-	A03:18211856-18212593	DB-control	PP5_OX	NOTEST	0	0	0	0	1	1	no
gene:Bra001744	gene:Bra001744	-	A03:18217713-18218178	DB-control	PP5_OX	NOTEST	0	0	0	0	1	1	no
gene:Bra013871	gene:Bra013871	-	A01:8159955-8164164	DB-control	PP5_OX	OK	3.33127	2.58305	-0.367001	-1.38777	0.0181	0.0279127	yes
gene:Bra014925	gene:Bra014925	-	A07:5210694-5211114	DB-control	PP5_OX	OK	0.762276	2.18489	1.51917	1.3872	0.0181	0.0279127	yes
gene:Bra016598	gene:Bra016598	-	A08:19215689-19217871	DB-control	PP5_OX	OK	13.2521	15.3672	0.213636	1.38079	0.0181	0.0279127	yes
gene:Bra001748	gene:Bra001748	-	A03:18231202-18232348	DB-control	PP5_OX	OK	5.09293	6.57757	0.369058	1.08241	0.06715	0.0930855	no
gene:Bra001749	gene:Bra001749	-	A03:18234990-18236202	DB-control	PP5_OX	NOTEST	0	0	0	0	1	1	no
gene:Bra001750	gene:Bra001750	-	A03:18238271-18239245	DB-control	PP5_OX	NOTEST	0	0	0	0	1	1	no
gene:Bra001751	gene:Bra001751	-	A03:18242810-18244037	DB-control	PP5_OX	NOTEST	0	0	0	0	1	1	no
gene:Bra017048	gene:Bra017048	-	A04:16921886-16922889	DB-control	PP5_OX	OK	2.69425	0.931576	-1.53214	-1.68367	0.0181	0.0279127	yes
gene:Bra001753	gene:Bra001753	-	A03:18251062-18251998	DB-control	PP5_OX	NOTEST	0	0	0	0	1	1	no
gene:Bra001754	gene:Bra001754	-	A03:18254515-18255358	DB-control	PP5_OX	NOTEST	0	0	0	0	1	1	no
gene:Bra001755	gene:Bra001755	-	A03:18255779-18257848	DB-control	PP5_OX	NOTEST	0	0	0	0	1	1	no
gene:Bra001756	gene:Bra001756	-	A03:18258343-18258634	DB-control	PP5_OX	OK	0.706195	0.638429	-0.145542	-0.0723877	0.8934	0.910954	no
gene:Bra030448	gene:Bra030448	-	A05:11376678-11378614	DB-control	PP5_OX	OK	2.93494	2.1352	-0.458961	-1.37294	0.0181	0.0279127	yes
gene:Bra001758	gene:Bra001758	-	A03:18270085-18270622	DB-control	PP5_OX	NOTEST	0	0	0	0	1	1	no
gene:Bra001759	gene:Bra001759	-	A03:18277421-18278237	DB-control	PP5_OX	NOTEST	0.0933388	0.208576	1.16002	0	1	1	no
gene:Bra001760	gene:Bra001760	-	A03:18278478-18278985	DB-control	PP5_OX	NOTEST	0.0688407	0	#NAME?	0	1	1	no
gene:Bra008828	gene:Bra008828	-	A10:14012451-14013384	DB-control	PP5_OX	OK	9.459	12.1917	0.366142	1.37535	0.01805	0.0278454	yes
gene:Bra001762	gene:Bra001762	-	A03:18299091-18301534	DB-control	PP5_OX	NOTEST	0	0.0403739	inf	0	1	1	no
gene:Bra001763	gene:Bra001763	-	A03:18310983-18313771	DB-control	PP5_OX	NOTEST	0	0	0	0	1	1	no
gene:Bra001764	gene:Bra001764	-	A03:18319452-18320649	DB-control	PP5_OX	NOTEST	0	0	0	0	1	1	no
gene:Bra001765	gene:Bra001765	-	A03:18325096-18325976	DB-control	PP5_OX	NOTEST	0	0	0	0	1	1	no
gene:Bra001766	gene:Bra001766	-	A03:18327913-18329841	DB-control	PP5_OX	OK	0.564127	0.711812	0.335477	0.594874	0.2882	0.342733	no
gene:Bra001767	gene:Bra001767	-	A03:18330964-18331609	DB-control	PP5_OX	OK	7.90015	8.13555	0.0423603	0.164616	0.7805	0.813462	no
gene:Bra028129	gene:Bra028129	-	A04:5984617-5985271	DB-control	PP5_OX	OK	7.58476	9.61645	0.342402	1.38804	0.01805	0.0278454	yes
gene:Bra009712	gene:Bra009712	-	A06:16698563-16703398	DB-control	PP5_OX	OK	23.6674	21.4878	-0.139387	-1.35784	0.018	0.0277715	yes
gene:Bra011141	gene:Bra011141	-	A01:3710900-3711750	DB-control	PP5_OX	OK	2.66615	5.87154	1.13898	1.47674	0.018	0.0277715	yes
gene:Bra022244	gene:Bra022244	-	A05:18872818-18874014	DB-control	PP5_OX	OK	1.65176	1.0174	-0.699126	-1.43515	0.01795	0.0276977	yes
gene:Bra001772	gene:Bra001772	-	A03:18361209-18365063	DB-control	PP5_OX	OK	6.11235	6.36231	0.0578222	0.310196	0.58925	0.640658	no
gene:Bra007422	gene:Bra007422	-	A09:29113799-29114150	DB-control	PP5_OX	OK	1.85448	4.57849	1.30386	1.69347	0.0179	0.0276221	yes
gene:Bra008755	gene:Bra008755	-	A10:13723506-13724319	DB-control	PP5_OX	OK	1.99925	0.395923	-2.33617	-2.24885	0.0179	0.0276221	yes
gene:Bra001775	gene:Bra001775	-	A03:18385641-18387267	DB-control	PP5_OX	NOTEST	0	0	0	0	1	1	no
gene:Bra001776	gene:Bra001776	-	A03:18388326-18394378	DB-control	PP5_OX	OK	4.38288	4.05556	-0.111978	-0.885999	0.12965	0.168674	no
gene:Bra001777	gene:Bra001777	-	A03:18397632-18398700	DB-control	PP5_OX	NOTEST	0	0	0	0	1	1	no
gene:Bra002565	gene:Bra002565	-	A10:8849309-8850521	DB-control	PP5_OX	OK	9.7385	8.10369	-0.265121	-1.37205	0.01785	0.0275482	yes
gene:Bra011193	gene:Bra011193	-	A01:3396130-3397446	DB-control	PP5_OX	OK	1.28453	0.623511	-1.04275	-1.34554	0.01785	0.0275482	yes
gene:Bra014541	gene:Bra014541	-	A04:1309051-1312331	DB-control	PP5_OX	OK	2.53387	3.39451	0.421859	1.4121	0.01785	0.0275482	yes
gene:Bra001781	gene:Bra001781	-	A03:18407145-18410487	DB-control	PP5_OX	OK	1.24546	1.04255	-0.256571	-0.82838	0.14925	0.191376	no
gene:Bra019266	gene:Bra019266	-	A03:25362210-25364301	DB-control	PP5_OX	OK	10.7315	12.2876	0.195354	1.39006	0.01785	0.0275482	yes
gene:Bra021366	gene:Bra021366	-	A01:25535213-25537573	DB-control	PP5_OX	OK	1.59555	1.10219	-0.533687	-1.37982	0.01785	0.0275482	yes
gene:Bra023389	gene:Bra023389	-	A02:3151964-3155825	DB-control	PP5_OX	OK	2.15171	2.70676	0.331087	1.37806	0.01785	0.0275482	yes
gene:Bra001785	gene:Bra001785	-	A03:18432150-18433649	DB-control	PP5_OX	NOTEST	0	0	0	0	1	1	no
gene:Bra001786	gene:Bra001786	-	A03:18437849-18448741	DB-control	PP5_OX	NOTEST	0	0	0	0	1	1	no
gene:Bra030345	gene:Bra030345	-	A04:8970248-8972437	DB-control	PP5_OX	OK	8.1399	9.52851	0.227239	1.36239	0.01785	0.0275482	yes
gene:Bra001788	gene:Bra001788	-	A03:18470943-18472106	DB-control	PP5_OX	OK	73.8435	71.4922	-0.0466846	-0.490619	0.39995	0.456942	no
gene:Bra040598	gene:Bra040598	-	A05:23567017-23568710	DB-control	PP5_OX	OK	52.014	46.5508	-0.160093	-1.36518	0.01785	0.0275482	yes
gene:Bra015694	gene:Bra015694	-	A07:21324360-21327418	DB-control	PP5_OX	OK	3.6059	2.89916	-0.314725	-1.37324	0.0178	0.027484	yes
gene:Bra001791	gene:Bra001791	-	A03:18485740-18487166	DB-control	PP5_OX	NOTEST	0	0	0	0	1	1	no
gene:Bra001792	gene:Bra001792	-	A03:18487749-18490529	DB-control	PP5_OX	OK	21.642	20.6948	-0.0645621	-0.576427	0.3338	0.389708	no
gene:Bra001793	gene:Bra001793	-	A03:18501033-18505290	DB-control	PP5_OX	NOTEST	0.0420076	0	#NAME?	0	1	1	no
gene:Bra023003	gene:Bra023003	-	A03:8178692-8180449	DB-control	PP5_OX	OK	22.5158	19.7572	-0.188559	-1.36662	0.0178	0.027484	yes
gene:Bra001795	gene:Bra001795	-	A03:18506848-18509542	DB-control	PP5_OX	NOTEST	0	0.0113454	inf	0	1	1	no
gene:Bra037118	gene:Bra037118	-	A09:4383943-4387498	DB-control	PP5_OX	OK	31.2664	34.8872	0.158084	1.42294	0.0178	0.027484	yes
gene:Bra003005	gene:Bra003005	-	A10:6119581-6121179	DB-control	PP5_OX	OK	26.7288	24.6553	-0.116496	-1.36592	0.01775	0.0274116	yes
gene:Bra001798	gene:Bra001798	-	A03:18524828-18527782	DB-control	PP5_OX	OK	2.03893	2.15741	0.0814913	0.247181	0.67165	0.717181	no
gene:Bra001799	gene:Bra001799	-	A03:18551757-18552198	DB-control	PP5_OX	NOTEST	0	0	0	0	1	1	no
gene:Bra001800	gene:Bra001800	-	A03:18554671-18555886	DB-control	PP5_OX	NOTEST	0	0	0	0	1	1	no
gene:Bra001801	gene:Bra001801	-	A03:18563158-18564239	DB-control	PP5_OX	NOTEST	0	0	0	0	1	1	no
gene:Bra001802	gene:Bra001802	-	A03:18567826-18569572	DB-control	PP5_OX	OK	9.41512	9.18075	-0.0363677	-0.280979	0.6272	0.675846	no
gene:Bra001803	gene:Bra001803	-	A03:18573134-18574256	DB-control	PP5_OX	NOTEST	0	0	0	0	1	1	no
gene:Bra001804	gene:Bra001804	-	A03:18575037-18576158	DB-control	PP5_OX	OK	10.2675	11.4386	0.155819	0.870941	0.13685	0.176954	no
gene:Bra014495	gene:Bra014495	-	A04:1022552-1024990	DB-control	PP5_OX	OK	11.1597	12.4686	0.160012	1.36158	0.01775	0.0274116	yes
gene:Bra015443	gene:Bra015443	-	A10:1730355-1731873	DB-control	PP5_OX	OK	2.79625	3.50962	0.327823	1.37405	0.01775	0.0274116	yes
gene:Bra016512	gene:Bra016512	-	A08:18821871-18822927	DB-control	PP5_OX	OK	19.0815	21.5914	0.178279	1.42761	0.01775	0.0274116	yes
gene:Bra001808	gene:Bra001808	-	A03:18591435-18591814	DB-control	PP5_OX	NOTEST	0.163218	0	#NAME?	0	1	1	no
gene:Bra011681	gene:Bra011681	-	A01:1076912-1078143	DB-control	PP5_OX	OK	0.937866	0.327136	-1.51949	-1.66019	0.0177	0.0273408	yes
gene:Bra016410	gene:Bra016410	-	A08:18321699-18324314	DB-control	PP5_OX	OK	3.03458	2.17661	-0.479415	-1.39604	0.0177	0.0273408	yes
gene:Bra001811	gene:Bra001811	-	A03:18602643-18604933	DB-control	PP5_OX	OK	1.06017	0.984926	-0.10621	-0.221646	0.6958	0.738612	no
gene:Bra018542	gene:Bra018542	-	A05:9072072-9081232	DB-control	PP5_OX	OK	2.83787	3.44961	0.281621	1.39041	0.0177	0.0273408	yes
gene:Bra024356	gene:Bra024356	-	A06:15145636-15146347	DB-control	PP5_OX	OK	13.769	10.3899	-0.406232	-1.38418	0.0177	0.0273408	yes
gene:Bra032443	gene:Bra032443	-	A09:36086542-36086900	DB-control	PP5_OX	OK	17.9842	11.0596	-0.701435	-1.3571	0.0177	0.0273408	yes
gene:Bra000274	gene:Bra000274	-	A03:10283039-10285153	DB-control	PP5_OX	OK	14.7345	16.5495	0.167583	1.36763	0.01765	0.0272716	yes
gene:Bra005603	gene:Bra005603	-	A05:6488046-6489125	DB-control	PP5_OX	OK	109.103	101.269	-0.107489	-1.35566	0.01765	0.0272716	yes
gene:Bra001817	gene:Bra001817	-	A03:18629957-18633181	DB-control	PP5_OX	OK	1.31585	1.19858	-0.13467	-0.295587	0.60645	0.656477	no
gene:Bra001818	gene:Bra001818	-	A03:18637980-18638973	DB-control	PP5_OX	OK	1.96575	1.72219	-0.190841	-0.46264	0.42705	0.484216	no
gene:Bra019312	gene:Bra019312	-	A03:25036748-25040217	DB-control	PP5_OX	OK	2.62071	3.12872	0.255616	1.39545	0.01765	0.0272716	yes
gene:Bra038314	gene:Bra038314	-	A02:11328138-11331000	DB-control	PP5_OX	OK	4.85815	3.44554	-0.495675	-1.37218	0.01765	0.0272716	yes
gene:Bra001821	gene:Bra001821	-	A03:18662522-18663416	DB-control	PP5_OX	NOTEST	0	0	0	0	1	1	no
gene:Bra009885	gene:Bra009885	-	A06:17888570-17889450	DB-control	PP5_OX	OK	0.533068	1.53263	1.52362	1.38427	0.01755	0.0271235	yes
gene:Bra001823	gene:Bra001823	-	A03:18671161-18671467	DB-control	PP5_OX	NOTEST	0	0	0	0	1	1	no
gene:Bra004056	gene:Bra004056	-	A07:16566050-16567394	DB-control	PP5_OX	OK	13.4349	16.0701	0.258393	1.39127	0.0175	0.0270478	yes
gene:Bra036557	gene:Bra036557	-	A09:1765361-1766489	DB-control	PP5_OX	OK	2.52755	4.00226	0.663073	1.45116	0.0175	0.0270478	yes
gene:Bra001826	gene:Bra001826	-	A03:18687478-18688453	DB-control	PP5_OX	NOTEST	0.0717467	0.0194916	-1.88006	0	1	1	no
gene:Bra001827	gene:Bra001827	-	A03:18690811-18695100	DB-control	PP5_OX	NOTEST	0.069193	0	#NAME?	0	1	1	no
gene:Bra004822	gene:Bra004822	-	A05:1970932-1973160	DB-control	PP5_OX	OK	10.8113	12.4624	0.205047	1.39505	0.01745	0.0269737	yes
gene:Bra001829	gene:Bra001829	-	A03:18705999-18707109	DB-control	PP5_OX	NOTEST	0	0	0	0	1	1	no
gene:Bra001830	gene:Bra001830	-	A03:18716523-18716832	DB-control	PP5_OX	OK	0.603428	2.05807	1.77004	0.933797	0.09455	0.12694	no
gene:Bra006262	gene:Bra006262	-	A03:2742123-2745093	DB-control	PP5_OX	OK	47.2542	42.2987	-0.159827	-1.36441	0.01745	0.0269737	yes
gene:Bra037154	gene:Bra037154	-	A09:4231302-4232421	DB-control	PP5_OX	OK	0.455522	1.39944	1.61926	2.05627	0.01745	0.0269737	yes
gene:Bra001833	gene:Bra001833	-	A03:18764787-18766643	DB-control	PP5_OX	NOTEST	0.178649	0.160052	-0.158593	0	1	1	no
gene:Bra037172	gene:Bra037172	-	A09:4150281-4151872	DB-control	PP5_OX	OK	4.03196	5.56191	0.464099	1.38646	0.01745	0.0269737	yes
gene:Bra001835	gene:Bra001835	-	A03:18770393-18772100	DB-control	PP5_OX	NOTEST	0	0	0	0	1	1	no
gene:Bra001836	gene:Bra001836	-	A03:18775536-18776522	DB-control	PP5_OX	OK	4.96599	5.3772	0.114773	0.296739	0.62375	0.672515	no
gene:Bra001837	gene:Bra001837	-	A03:18777223-18780206	DB-control	PP5_OX	NOTEST	0.265666	0.0853225	-1.63862	0	1	1	no
gene:Bra001838	gene:Bra001838	-	A03:18784342-18784840	DB-control	PP5_OX	NOTEST	0	0	0	0	1	1	no
gene:Bra001839	gene:Bra001839	-	A03:18786976-18787927	DB-control	PP5_OX	NOTEST	0	0	0	0	1	1	no
gene:Bra004474	gene:Bra004474	-	A05:319334-320626	DB-control	PP5_OX	OK	0.972962	0.38698	-1.33012	-1.61391	0.0174	0.0269027	yes
gene:Bra016937	gene:Bra016937	-	A04:17524238-17525203	DB-control	PP5_OX	OK	18.2129	15.7497	-0.20964	-1.37339	0.0174	0.0269027	yes
gene:Bra021588	gene:Bra021588	-	A01:24324527-24325489	DB-control	PP5_OX	OK	1.61797	0.878597	-0.880909	-1.54706	0.0174	0.0269027	yes
gene:Bra001843	gene:Bra001843	-	A03:18821498-18825248	DB-control	PP5_OX	NOTEST	0	0	0	0	1	1	no
gene:Bra001844	gene:Bra001844	-	A03:18828653-18829288	DB-control	PP5_OX	NOTEST	0	0	0	0	1	1	no
gene:Bra034057	gene:Bra034057	-	A01:27665371-27667503	DB-control	PP5_OX	OK	8.9467	10.408	0.21827	1.3797	0.0174	0.0269027	yes
gene:Bra034095	gene:Bra034095	-	A01:27475060-27475671	DB-control	PP5_OX	OK	12.7492	5.0843	-1.32629	-1.62659	0.0174	0.0269027	yes
gene:Bra001847	gene:Bra001847	-	A03:18843340-18844741	DB-control	PP5_OX	NOTEST	0.0694432	0.0315187	-1.13963	0	1	1	no
gene:Bra001848	gene:Bra001848	-	A03:18848108-18849946	DB-control	PP5_OX	OK	15.7068	17.5037	0.156269	1.05064	0.07055	0.0974078	no
gene:Bra001849	gene:Bra001849	-	A03:18856732-18857706	DB-control	PP5_OX	NOTEST	0	0.0325	inf	0	1	1	no
gene:Bra001850	gene:Bra001850	-	A03:18860037-18861397	DB-control	PP5_OX	NOTEST	0	0	0	0	1	1	no
gene:Bra001851	gene:Bra001851	-	A03:18870866-18872302	DB-control	PP5_OX	NOTEST	0.101112	0.213887	1.08089	0	1	1	no
gene:Bra001852	gene:Bra001852	-	A03:18876674-18877460	DB-control	PP5_OX	OK	297.47	281.396	-0.0801403	-0.739401	0.1959	0.243662	no
gene:Bra001853	gene:Bra001853	-	A03:18881377-18886719	DB-control	PP5_OX	NOTEST	0	0	0	0	1	1	no
gene:Bra001854	gene:Bra001854	-	A03:18898649-18911242	DB-control	PP5_OX	NOTEST	0.163108	0.213047	0.385345	0	1	1	no
gene:Bra001855	gene:Bra001855	-	A03:18925149-18926869	DB-control	PP5_OX	NOTEST	0.526171	0.481439	-0.128177	0	1	1	no
gene:Bra001856	gene:Bra001856	-	A03:18932935-18933520	DB-control	PP5_OX	NOTEST	0	0	0	0	1	1	no
gene:Bra036200	gene:Bra036200	-	A09:2219225-2222681	DB-control	PP5_OX	OK	2.41638	2.96607	0.295704	1.39571	0.0174	0.0269027	yes
gene:Bra001858	gene:Bra001858	-	A03:18968773-18969388	DB-control	PP5_OX	NOTEST	0	0	0	0	1	1	no
gene:Bra001859	gene:Bra001859	-	A03:18991289-18993153	DB-control	PP5_OX	NOTEST	0	0	0	0	1	1	no
gene:Bra001860	gene:Bra001860	-	A03:19018802-19020710	DB-control	PP5_OX	NOTEST	0	0	0	0	1	1	no
gene:Bra001861	gene:Bra001861	-	A03:19028755-19029439	DB-control	PP5_OX	NOTEST	0	0	0	0	1	1	no
gene:Bra004528	gene:Bra004528	-	A05:648252-648832	DB-control	PP5_OX	OK	92.2054	63.3816	-0.540786	-1.43034	0.01735	0.0268349	yes
gene:Bra001863	gene:Bra001863	-	A03:19043168-19043917	DB-control	PP5_OX	OK	1.69707	2.38085	0.488429	0.962849	0.0944	0.126778	no
gene:Bra001864	gene:Bra001864	-	A03:19044678-19045698	DB-control	PP5_OX	OK	49.6706	46.4652	-0.0962428	-0.923997	0.11095	0.146767	no
gene:Bra008162	gene:Bra008162	-	A02:13527438-13527919	DB-control	PP5_OX	OK	114.4	100.815	-0.18238	-1.36943	0.01735	0.0268349	yes
gene:Bra022060	gene:Bra022060	-	A02:18964809-18967545	DB-control	PP5_OX	OK	2.76586	3.39842	0.29714	1.39082	0.01735	0.0268349	yes
gene:Bra022443	gene:Bra022443	-	A05:17664411-17664609	DB-control	PP5_OX	OK	7.6237	17.6675	1.21253	1.45011	0.01735	0.0268349	yes
gene:Bra023915	gene:Bra023915	-	A01:21001556-21004651	DB-control	PP5_OX	OK	2.4402	3.62183	0.569719	1.42624	0.01735	0.0268349	yes
gene:Bra001869	gene:Bra001869	-	A03:19075933-19076723	DB-control	PP5_OX	NOTEST	0	0	0	0	1	1	no
gene:Bra001870	gene:Bra001870	-	A03:19078084-19080068	DB-control	PP5_OX	NOTEST	0.259659	0.312642	0.267893	0	1	1	no
gene:Bra001871	gene:Bra001871	-	A03:19081667-19083395	DB-control	PP5_OX	NOTEST	0.0346428	0.0238613	-0.537878	0	1	1	no
gene:Bra001872	gene:Bra001872	-	A03:19085014-19085341	DB-control	PP5_OX	OK	0.925772	0.589425	-0.651348	-0.4687	0.5653	0.618176	no
gene:Bra017004	gene:Bra017004	-	A04:17179305-17181271	DB-control	PP5_OX	OK	32.1756	29.6003	-0.120352	-1.40931	0.0173	0.0267655	yes
gene:Bra017096	gene:Bra017096	-	A04:16623750-16627261	DB-control	PP5_OX	OK	4.62163	5.46928	0.242948	1.39736	0.0173	0.0267655	yes
gene:Bra002853	gene:Bra002853	-	A10:7154220-7155066	DB-control	PP5_OX	OK	1.2986	2.10346	0.695808	1.40569	0.01725	0.0266912	yes
gene:Bra001876	gene:Bra001876	-	A03:19110666-19111824	DB-control	PP5_OX	NOTEST	0	0	0	0	1	1	no
gene:Bra019252	gene:Bra019252	-	A03:25425223-25426298	DB-control	PP5_OX	OK	0.782862	4.36597	2.47947	1.95506	0.01725	0.0266912	yes
gene:Bra001878	gene:Bra001878	-	A03:19114469-19114862	DB-control	PP5_OX	NOTEST	0	0	0	0	1	1	no
gene:Bra001879	gene:Bra001879	-	A03:19115089-19115650	DB-control	PP5_OX	NOTEST	0	0	0	0	1	1	no
gene:Bra001880	gene:Bra001880	-	A03:19116797-19117163	DB-control	PP5_OX	NOTEST	0.0825151	0	#NAME?	0	1	1	no
gene:Bra029055	gene:Bra029055	-	A03:6092029-6092745	DB-control	PP5_OX	OK	0.66602	0.133744	-2.31609	-1.23032	0.01725	0.0266912	yes
gene:Bra030675	gene:Bra030675	-	A08:20850952-20852194	DB-control	PP5_OX	OK	126.899	113.682	-0.158679	-1.37939	0.01725	0.0266912	yes
gene:Bra001883	gene:Bra001883	-	A03:19122879-19124007	DB-control	PP5_OX	NOTEST	0	0	0	0	1	1	no
gene:Bra001884	gene:Bra001884	-	A03:19126127-19132768	DB-control	PP5_OX	OK	5.01734	4.76835	-0.0734339	-0.598777	0.30445	0.359486	no
gene:Bra037032	gene:Bra037032	-	A03:28814148-28815347	DB-control	PP5_OX	OK	23.4513	26.5693	0.18009	1.36702	0.01725	0.0266912	yes
gene:Bra002443	gene:Bra002443	-	A10:9552062-9553351	DB-control	PP5_OX	OK	8.54393	10.5305	0.301599	1.38853	0.0172	0.0266217	yes
gene:Bra001887	gene:Bra001887	-	A03:19145126-19145456	DB-control	PP5_OX	NOTEST	0	0	0	0	1	1	no
gene:Bra001888	gene:Bra001888	-	A03:19147216-19148189	DB-control	PP5_OX	NOTEST	0	0	0	0	1	1	no
gene:Bra001889	gene:Bra001889	-	A03:19148757-19149904	DB-control	PP5_OX	OK	29.3609	29.5994	0.0116702	0.0940481	0.87305	0.893779	no
gene:Bra001890	gene:Bra001890	-	A03:19150556-19151171	DB-control	PP5_OX	NOTEST	0	0	0	0	1	1	no
gene:Bra007227	gene:Bra007227	-	A09:28081762-28085684	DB-control	PP5_OX	OK	6.8049	8.73026	0.359452	1.388	0.0172	0.0266217	yes
gene:Bra001892	gene:Bra001892	-	A03:19170851-19172178	DB-control	PP5_OX	OK	0.0781332	2.31769	4.89061	1.79091	0.168	0.21239	no
gene:Bra001893	gene:Bra001893	-	A03:19173682-19174262	DB-control	PP5_OX	NOTEST	0	0	0	0	1	1	no
gene:Bra010082	gene:Bra010082	-	A06:19261020-19262367	DB-control	PP5_OX	OK	1.72685	0.951058	-0.860539	-1.49298	0.0172	0.0266217	yes
gene:Bra001895	gene:Bra001895	-	A03:19186785-19188464	DB-control	PP5_OX	NOTEST	0.0165061	0.0281606	0.770676	0	1	1	no
gene:Bra015322	gene:Bra015322	-	A10:2480288-2484322	DB-control	PP5_OX	OK	25.3499	27.4445	0.114538	1.37388	0.0172	0.0266217	yes
gene:Bra016785	gene:Bra016785	-	A08:19968124-19970803	DB-control	PP5_OX	OK	12.324	11.3037	-0.124676	-1.38978	0.0172	0.0266217	yes
gene:Bra001898	gene:Bra001898	-	A03:19222276-19223261	DB-control	PP5_OX	NOTEST	0	0	0	0	1	1	no
gene:Bra034309	gene:Bra034309	-	A04:11815576-11817633	DB-control	PP5_OX	OK	41.6483	45.1287	0.115788	1.37466	0.0172	0.0266217	yes
gene:Bra040301	gene:Bra040301	-	Scaffold000196:2676-6908	DB-control	PP5_OX	OK	15.6255	16.9722	0.119274	1.39107	0.0172	0.0266217	yes
gene:Bra001901	gene:Bra001901	-	A03:19252436-19254350	DB-control	PP5_OX	NOTEST	0	0	0	0	1	1	no
gene:Bra001902	gene:Bra001902	-	A03:19255775-19257457	DB-control	PP5_OX	NOTEST	0	0	0	0	1	1	no
gene:Bra009050	gene:Bra009050	-	A10:15028333-15028717	DB-control	PP5_OX	OK	4.43484	2.42843	-0.86886	-1.43078	0.01715	0.0265553	yes
gene:Bra001904	gene:Bra001904	-	A03:19274073-19274589	DB-control	PP5_OX	NOTEST	0	0	0	0	1	1	no
gene:Bra022421	gene:Bra022421	-	A05:17800518-17803681	DB-control	PP5_OX	OK	2.05575	1.54077	-0.416014	-1.42481	0.01715	0.0265553	yes
gene:Bra001906	gene:Bra001906	-	A03:19288208-19289194	DB-control	PP5_OX	NOTEST	0	0	0	0	1	1	no
gene:Bra033900	gene:Bra033900	-	A05:15001598-15004646	DB-control	PP5_OX	OK	2.02807	2.44178	0.267828	1.39804	0.01715	0.0265553	yes
gene:Bra001908	gene:Bra001908	-	A03:19301066-19302168	DB-control	PP5_OX	NOTEST	0	0	0	0	1	1	no
gene:Bra035849	gene:Bra035849	-	A09:3312120-3313649	DB-control	PP5_OX	OK	11.3467	12.7928	0.173057	1.37636	0.01715	0.0265553	yes
gene:Bra001910	gene:Bra001910	-	A03:19309684-19310424	DB-control	PP5_OX	NOTEST	0	0	0	0	1	1	no
gene:Bra040822	gene:Bra040822	-	Scaffold000271:3905-7928	DB-control	PP5_OX	OK	12.3261	11.3516	-0.118822	-1.36151	0.01715	0.0265553	yes
gene:Bra001912	gene:Bra001912	-	A03:19313943-19319107	DB-control	PP5_OX	NOTEST	0	0	0	0	1	1	no
gene:Bra010260	gene:Bra010260	-	A08:13483065-13484262	DB-control	PP5_OX	OK	28.4231	32.9488	0.213161	1.37525	0.0171	0.0264857	yes
gene:Bra013890	gene:Bra013890	-	A01:8269445-8270885	DB-control	PP5_OX	OK	0.339369	0.81008	1.25521	1.48983	0.0171	0.0264857	yes
gene:Bra001915	gene:Bra001915	-	A03:19330710-19331157	DB-control	PP5_OX	NOTEST	0	0	0	0	1	1	no
gene:Bra001916	gene:Bra001916	-	A03:19332771-19334455	DB-control	PP5_OX	NOTEST	0	0	0	0	1	1	no
gene:Bra001917	gene:Bra001917	-	A03:19337363-19338849	DB-control	PP5_OX	NOTEST	0.175645	0.090875	-0.950703	0	1	1	no
gene:Bra001918	gene:Bra001918	-	A03:19339708-19341366	DB-control	PP5_OX	NOTEST	0	0.015968	inf	0	1	1	no
gene:Bra019546	gene:Bra019546	-	A06:12334823-12339300	DB-control	PP5_OX	OK	5.5059	6.18438	0.167651	1.36575	0.0171	0.0264857	yes
gene:Bra001920	gene:Bra001920	-	A03:19348077-19348272	DB-control	PP5_OX	NOTEST	0	0	0	0	1	1	no
gene:Bra022949	gene:Bra022949	-	A03:7904694-7905208	DB-control	PP5_OX	OK	50.0515	56.8575	0.183937	1.37683	0.0171	0.0264857	yes
gene:Bra001922	gene:Bra001922	-	A03:19353163-19353583	DB-control	PP5_OX	NOTEST	0	0	0	0	1	1	no
gene:Bra024991	gene:Bra024991	-	A06:24560315-24561787	DB-control	PP5_OX	OK	30.6946	33.5512	0.128379	1.37588	0.0171	0.0264857	yes
gene:Bra001924	gene:Bra001924	-	A03:19372241-19373860	DB-control	PP5_OX	NOTEST	0.0274445	0	#NAME?	0	1	1	no
gene:Bra001925	gene:Bra001925	-	A03:19378634-19379905	DB-control	PP5_OX	OK	40.0053	37.7293	-0.0845064	-0.929284	0.1235	0.161731	no
gene:Bra026241	gene:Bra026241	-	A01:10450435-10452555	DB-control	PP5_OX	OK	1.23927	2.01263	0.699588	1.36211	0.0171	0.0264857	yes
gene:Bra001927	gene:Bra001927	-	A03:19387619-19389410	DB-control	PP5_OX	OK	27.9341	25.8416	-0.112334	-1.00448	0.0842	0.114301	no
gene:Bra001928	gene:Bra001928	-	A03:19397088-19398548	DB-control	PP5_OX	NOTEST	0	0.0232632	inf	0	1	1	no
gene:Bra028740	gene:Bra028740	-	A02:2289390-2292228	DB-control	PP5_OX	OK	29.8651	32.4607	0.120234	1.40415	0.0171	0.0264857	yes
gene:Bra001930	gene:Bra001930	-	A03:19427895-19430056	DB-control	PP5_OX	OK	30.2349	28.9049	-0.0649016	-0.659727	0.2556	0.308138	no
gene:Bra001931	gene:Bra001931	-	A03:19430822-19434195	DB-control	PP5_OX	OK	144.462	143.802	-0.00660047	-0.0611325	0.9114	0.926538	no
gene:Bra001932	gene:Bra001932	-	A03:19436196-19437286	DB-control	PP5_OX	NOTEST	0.0354586	0.0635368	0.841456	0	1	1	no
gene:Bra001933	gene:Bra001933	-	A03:19438578-19438971	DB-control	PP5_OX	NOTEST	0	0	0	0	1	1	no
gene:Bra036459	gene:Bra036459	-	A07:276379-278230	DB-control	PP5_OX	OK	28.7885	31.4066	0.125576	1.42476	0.0171	0.0264857	yes
gene:Bra001215	gene:Bra001215	-	A03:15373454-15375734	DB-control	PP5_OX	OK	4.51968	5.51361	0.286777	1.37287	0.01705	0.0264207	yes
gene:Bra001936	gene:Bra001936	-	A03:19460166-19468233	DB-control	PP5_OX	NOTEST	0	0	0	0	1	1	no
gene:Bra007273	gene:Bra007273	-	A09:28305964-28307711	DB-control	PP5_OX	OK	3.90526	3.05135	-0.355972	-1.40653	0.01705	0.0264207	yes
gene:Bra001938	gene:Bra001938	-	A03:19471161-19471542	DB-control	PP5_OX	NOTEST	0.503517	0.12589	-1.99987	0	1	1	no
gene:Bra001939	gene:Bra001939	-	A03:19473742-19474120	DB-control	PP5_OX	NOTEST	0.166561	0	#NAME?	0	1	1	no
gene:Bra001940	gene:Bra001940	-	A03:19475059-19476562	DB-control	PP5_OX	NOTEST	0	0.0447628	inf	0	1	1	no
gene:Bra001941	gene:Bra001941	-	A03:19484303-19485334	DB-control	PP5_OX	NOTEST	0.111661	0.0311499	-1.84183	0	1	1	no
gene:Bra038196	gene:Bra038196	-	Scaffold000141:366938-367377	DB-control	PP5_OX	OK	1.90494	4.82879	1.34192	1.6195	0.01705	0.0264207	yes
gene:Bra001943	gene:Bra001943	-	A03:19502232-19503832	DB-control	PP5_OX	OK	0.559116	0.746161	0.416337	0.387855	0.47545	0.531861	no
gene:Bra001944	gene:Bra001944	-	A03:19504787-19508164	DB-control	PP5_OX	NOTEST	0.213727	0.200076	-0.0952157	0	1	1	no
gene:Bra006378	gene:Bra006378	-	A03:3262004-3264587	DB-control	PP5_OX	OK	0.297864	0.689296	1.21047	1.59092	0.017	0.0263479	yes
gene:Bra012105	gene:Bra012105	-	A07:9991185-9991852	DB-control	PP5_OX	OK	3.23523	1.88011	-0.783052	-1.38233	0.017	0.0263479	yes
gene:Bra001947	gene:Bra001947	-	A03:19516636-19517984	DB-control	PP5_OX	NOTEST	0	0	0	0	1	1	no
gene:Bra014911	gene:Bra014911	-	A07:5266737-5276162	DB-control	PP5_OX	OK	16.533	17.925	0.116619	1.39077	0.017	0.0263479	yes
gene:Bra034553	gene:Bra034553	-	A08:12853499-12861079	DB-control	PP5_OX	OK	71.4928	64.3015	-0.152946	-1.35739	0.017	0.0263479	yes
gene:Bra029430	gene:Bra029430	-	A09:18159159-18160968	DB-control	PP5_OX	OK	11.1365	9.32413	-0.256251	-1.37979	0.01695	0.0262766	yes
gene:Bra001951	gene:Bra001951	-	A03:19567636-19568656	DB-control	PP5_OX	OK	21.4105	21.2325	-0.0120434	-0.121362	0.8464	0.871423	no
gene:Bra007818	gene:Bra007818	-	A09:31041949-31043546	DB-control	PP5_OX	OK	8.88042	6.94822	-0.353985	-1.39856	0.0169	0.0262006	yes
gene:Bra030718	gene:Bra030718	-	A08:20667065-20668703	DB-control	PP5_OX	OK	7.65092	9.35685	0.290391	1.37374	0.0169	0.0262006	yes
gene:Bra001954	gene:Bra001954	-	A10:12795228-12796713	DB-control	PP5_OX	OK	2.76146	3.37381	0.288948	1.16052	0.04775	0.0681054	no
gene:Bra001955	gene:Bra001955	-	A10:12791904-12792783	DB-control	PP5_OX	NOTEST	0	0	0	0	1	1	no
gene:Bra001956	gene:Bra001956	-	A10:12766833-12769623	DB-control	PP5_OX	OK	5.07079	6.43395	0.343495	1.22583	0.0386	0.0561435	no
gene:Bra001957	gene:Bra001957	-	A10:12734775-12734952	DB-control	PP5_OX	NOTEST	0	0	0	0	1	1	no
gene:Bra030834	gene:Bra030834	-	A08:154952-156504	DB-control	PP5_OX	OK	0.367212	0.711071	0.953382	1.35286	0.0169	0.0262006	yes
gene:Bra022011	gene:Bra022011	-	A02:18507793-18508442	DB-control	PP5_OX	OK	151.294	164.649	0.122038	1.37136	0.01685	0.0261277	yes
gene:Bra026884	gene:Bra026884	-	A09:34107551-34108931	DB-control	PP5_OX	OK	0.619174	0.291469	-1.087	-1.42798	0.01685	0.0261277	yes
gene:Bra001961	gene:Bra001961	-	A10:12719152-12720121	DB-control	PP5_OX	NOTEST	0	0	0	0	1	1	no
gene:Bra001962	gene:Bra001962	-	A10:12706037-12707277	DB-control	PP5_OX	NOTEST	0	0	0	0	1	1	no
gene:Bra001963	gene:Bra001963	-	A10:12702217-12702838	DB-control	PP5_OX	NOTEST	0	0.0688722	inf	0	1	1	no
gene:Bra012253	gene:Bra012253	-	A07:9070660-9072114	DB-control	PP5_OX	OK	0.621893	0.166669	-1.89968	-1.90941	0.0168	0.0260533	yes
gene:Bra001965	gene:Bra001965	-	A10:12685121-12685423	DB-control	PP5_OX	NOTEST	0	0	0	0	1	1	no
gene:Bra001966	gene:Bra001966	-	A10:12659722-12661421	DB-control	PP5_OX	NOTEST	0	0	0	0	1	1	no
gene:Bra001967	gene:Bra001967	-	A10:12652671-12654370	DB-control	PP5_OX	NOTEST	0	0	0	0	1	1	no
gene:Bra001968	gene:Bra001968	-	A10:12639909-12640692	DB-control	PP5_OX	NOTEST	0	0	0	0	1	1	no
gene:Bra001969	gene:Bra001969	-	A10:12631724-12633808	DB-control	PP5_OX	NOTEST	0	0	0	0	1	1	no
gene:Bra001970	gene:Bra001970	-	A10:12624623-12629275	DB-control	PP5_OX	OK	39.4639	41.9491	0.088104	0.784675	0.1643	0.208344	no
gene:Bra019109	gene:Bra019109	-	A03:26288967-26289936	DB-control	PP5_OX	OK	8.01304	9.53752	0.251264	1.38261	0.0168	0.0260533	yes
gene:Bra001972	gene:Bra001972	-	A10:12601665-12602362	DB-control	PP5_OX	OK	8.59918	8.40641	-0.0327092	-0.114839	0.83905	0.865043	no
gene:Bra001973	gene:Bra001973	-	A10:12597280-12599651	DB-control	PP5_OX	OK	4.51539	4.22724	-0.0951339	-0.566606	0.3186	0.374058	no
gene:Bra029515	gene:Bra029515	-	A09:17422996-17426368	DB-control	PP5_OX	OK	0.736345	0.2954	-1.31771	-1.81703	0.0168	0.0260533	yes
gene:Bra039130	gene:Bra039130	-	A05:23823618-23824695	DB-control	PP5_OX	OK	131.235	145.785	0.151689	1.34666	0.0168	0.0260533	yes
gene:Bra001976	gene:Bra001976	-	A10:12535868-12537491	DB-control	PP5_OX	NOTEST	0.41806	0.364201	-0.198974	0	1	1	no
gene:Bra007158	gene:Bra007158	-	A09:27626940-27627844	DB-control	PP5_OX	OK	10.1957	7.80496	-0.3855	-1.40443	0.01675	0.0259819	yes
gene:Bra001978	gene:Bra001978	-	A10:12524014-12526692	DB-control	PP5_OX	OK	1.23362	1.52397	0.304932	0.354467	0.5367	0.590764	no
gene:Bra001979	gene:Bra001979	-	A10:12520457-12522028	DB-control	PP5_OX	NOTEST	0	0	0	0	1	1	no
gene:Bra001980	gene:Bra001980	-	A10:12516241-12517915	DB-control	PP5_OX	OK	3.15713	3.23157	0.0336194	0.143007	0.80535	0.83601	no
gene:Bra001981	gene:Bra001981	-	A10:12506547-12506790	DB-control	PP5_OX	NOTEST	0	0	0	0	1	1	no
gene:Bra007407	gene:Bra007407	-	A09:29038482-29039364	DB-control	PP5_OX	OK	2.32358	3.33221	0.520131	1.44664	0.01675	0.0259819	yes
gene:Bra025348	gene:Bra025348	-	A06:22061729-22063786	DB-control	PP5_OX	OK	53.0312	48.773	-0.120758	-1.39576	0.0167	0.0259074	yes
gene:Bra033939	gene:Bra033939	-	A02:10768485-10771825	DB-control	PP5_OX	OK	0.973599	0.64472	-0.594655	-1.43853	0.0167	0.0259074	yes
gene:Bra001985	gene:Bra001985	-	A10:12478214-12478906	DB-control	PP5_OX	NOTEST	0	0	0	0	1	1	no
gene:Bra034051	gene:Bra034051	-	A01:27688217-27690056	DB-control	PP5_OX	OK	0.373377	0.65049	0.800896	1.48149	0.0167	0.0259074	yes
gene:Bra001987	gene:Bra001987	-	A10:12462851-12463971	DB-control	PP5_OX	NOTEST	0	0	0	0	1	1	no
gene:Bra000291	gene:Bra000291	-	A03:10363383-10365568	DB-control	PP5_OX	OK	0.811835	1.81682	1.16216	1.53743	0.01665	0.0258344	yes
gene:Bra001989	gene:Bra001989	-	A10:12445151-12446137	DB-control	PP5_OX	NOTEST	0	0	0	0	1	1	no
gene:Bra001991	gene:Bra001991	-	A10:12436030-12440127	DB-control	PP5_OX	NOTEST	0	0	0	0	1	1	no
gene:Bra024258	gene:Bra024258	-	A06:14579483-14580923	DB-control	PP5_OX	OK	6.26215	8.07291	0.366431	1.39579	0.01665	0.0258344	yes
gene:Bra001993	gene:Bra001993	-	A10:12421197-12421789	DB-control	PP5_OX	NOTEST	0	0	0	0	1	1	no
gene:Bra001994	gene:Bra001994	-	A10:12406384-12407631	DB-control	PP5_OX	OK	16.318	14.2281	-0.197723	-1.00275	0.0813	0.110777	no
gene:Bra026210	gene:Bra026210	-	A06:5566446-5567815	DB-control	PP5_OX	OK	7.57539	9.39666	0.310827	1.41052	0.01665	0.0258344	yes
gene:Bra026412	gene:Bra026412	-	A01:9466353-9467497	DB-control	PP5_OX	OK	125.392	111.795	-0.165582	-1.3913	0.01665	0.0258344	yes
gene:Bra001997	gene:Bra001997	-	A10:12384071-12386170	DB-control	PP5_OX	OK	17.0935	18.2001	0.0904981	0.811146	0.16275	0.206648	no
gene:Bra001998	gene:Bra001998	-	A10:12377576-12379370	DB-control	PP5_OX	NOTEST	0	0.0192959	inf	0	1	1	no
gene:Bra035886	gene:Bra035886	-	A09:3099529-3101513	DB-control	PP5_OX	OK	0.977226	0.56414	-0.792639	-1.48919	0.01665	0.0258344	yes
gene:Bra002403	gene:Bra002403	-	A10:9817944-9819457	DB-control	PP5_OX	OK	1.48608	2.20319	0.568079	1.4964	0.0166	0.0257644	yes
gene:Bra002479	gene:Bra002479	-	A10:9301024-9304452	DB-control	PP5_OX	OK	12.7179	13.9524	0.133658	1.40968	0.0166	0.0257644	yes
gene:Bra006371	gene:Bra006371	-	A03:3221687-3223349	DB-control	PP5_OX	OK	26.4612	29.7303	0.168057	1.39275	0.0166	0.0257644	yes
gene:Bra014973	gene:Bra014973	-	A07:4674824-4677019	DB-control	PP5_OX	OK	153.725	138.244	-0.153136	-1.38392	0.0166	0.0257644	yes
[truncated: 40,187 more rows]

## Sheet: adj p value less than 0.05
Bra000002
Bra000003
Bra000008
Bra000009
Bra000011
Bra000012
Bra000013
Bra000017
Bra000018
Bra000019
Bra000021
Bra000024
Bra000027
Bra000028
Bra000029
Bra000031
Bra000034
Bra000035
Bra000036
Bra000037
Bra000039
Bra000042
Bra000043
Bra000044
Bra000045
Bra000046
Bra000047
Bra000052
Bra000053
Bra000056
Bra000057
Bra000058
Bra000060
Bra000062
Bra000063
Bra000064
Bra000065
Bra000071
Bra000073
Bra000074
Bra000075
Bra000079
Bra000080
Bra000081
Bra000089
Bra000090
Bra000092
Bra000093
Bra000094
Bra000103
Bra000111
Bra000114
Bra000115
Bra000117
Bra000118
Bra000120
Bra000122
Bra000124
Bra000125
Bra000126
Bra000127
Bra000129
Bra000131
Bra000132
Bra000134
Bra000135
Bra000140
Bra000141
Bra000143
Bra000144
Bra000145
Bra000147
Bra000149
Bra000150
Bra000151
Bra000152
Bra000153
Bra000154
Bra000155
Bra000158
Bra000159
Bra000161
Bra000162
Bra000163
Bra000164
Bra000165
Bra000169
Bra000170
Bra000171
Bra000179
Bra000181
Bra000187
Bra000190
Bra000193
Bra000197
Bra000198
Bra000199
Bra000201
Bra000203
Bra000207
Bra000213
Bra000214
Bra000215
Bra000216
Bra000217
Bra000218
Bra000222
Bra000225
Bra000226
Bra000227
Bra000228
Bra000231
Bra000236
Bra000237
Bra000238
Bra000239
Bra000240
Bra000242
Bra000245
Bra000247
Bra000249
Bra000256
Bra000260
Bra000261
Bra000263
Bra000265
Bra000267
Bra000268
Bra000272
Bra000274
Bra000277
Bra000281
Bra000282
Bra000283
Bra000285
Bra000286
Bra000288
Bra000289
Bra000291
Bra000292
Bra000293
Bra000297
Bra000299
Bra000300
Bra000301
Bra000302
Bra000303
Bra000305
Bra000307
Bra000308
Bra000310
Bra000311
Bra000312
Bra000315
Bra000316
Bra000317
Bra000321
Bra000328
Bra000334
Bra000335
Bra000336
Bra000338
Bra000339
Bra000340
Bra000341
Bra000342
Bra000344
Bra000346
Bra000347
Bra000349
Bra000351
Bra000352
Bra000353
Bra000355
Bra000358
Bra000359
Bra000361
Bra000365
Bra000366
Bra000368
Bra000375
Bra000376
Bra000377
Bra000378
Bra000379
Bra000382
Bra000384
Bra000385
Bra000386
Bra000387
Bra000390
Bra000391
Bra000397
Bra000399
Bra000400
Bra000403
Bra000405
Bra000410
Bra000412
Bra000415
Bra000416
Bra000417
Bra000419
Bra000420
Bra000421
Bra000423
Bra000429
Bra000430
Bra000434
Bra000441
Bra000442
Bra000445
Bra000447
Bra000451
Bra000452
Bra000453
Bra000454
Bra000455
Bra000458
Bra000460
Bra000461
Bra000464
Bra000465
Bra000472
Bra000473
Bra000474
Bra000475
Bra000477
Bra000479
Bra000480
Bra000483
Bra000487
Bra000492
Bra000493
Bra000494
Bra000497
Bra000498
Bra000499
Bra000500
Bra000501
Bra000505
Bra000507
Bra000508
Bra000511
Bra000512
Bra000513
Bra000517
Bra000518
Bra000523
Bra000526
Bra000528
Bra000529
Bra000531
Bra000533
Bra000534
Bra000536
Bra000537
Bra000542
Bra000544
Bra000545
Bra000546
Bra000547
Bra000551
Bra000552
Bra000553
Bra000554
Bra000557
Bra000558
Bra000561
Bra000563
Bra000564
Bra000566
Bra000567
Bra000568
Bra000570
Bra000571
Bra000573
Bra000575
Bra000577
Bra000583
Bra000584
Bra000585
Bra000586
Bra000587
Bra000588
Bra000592
Bra000593
Bra000595
Bra000596
Bra000597
Bra000598
Bra000599
Bra000600
Bra000601
Bra000602
Bra000604
Bra000605
Bra000611
Bra000612
Bra000614
Bra000615
Bra000617
Bra000619
Bra000621
Bra000623
Bra000632
Bra000634
Bra000635
Bra000637
Bra000638
Bra000639
Bra000642
Bra000643
Bra000644
Bra000646
Bra000647
Bra000651
Bra000654
Bra000656
Bra000657
Bra000659
Bra000660
Bra000661
Bra000662
Bra000663
Bra000664
Bra000667
Bra000670
Bra000673
Bra000675
Bra000681
Bra000683
Bra000685
Bra000687
Bra000688
Bra000689
Bra000690
Bra000691
Bra000692
Bra000693
Bra000694
Bra000698
Bra000699
Bra000700
Bra000701
Bra000706
Bra000708
Bra000710
Bra000711
Bra000713
Bra000714
Bra000715
Bra000719
Bra000721
Bra000724
Bra000728
Bra000729
Bra000733
Bra000734
Bra000736
Bra000737
Bra000739
Bra000740
Bra000742
Bra000747
Bra000749
Bra000754
Bra000756
Bra000757
Bra000758
Bra000760
Bra000766
Bra000767
Bra000768
Bra000769
Bra000773
Bra000774
Bra000775
Bra000776
Bra000778
Bra000779
Bra000781
Bra000782
Bra000783
Bra000785
Bra000789
Bra000791
Bra000793
Bra000796
Bra000797
Bra000799
Bra000800
Bra000802
Bra000803
Bra000806
Bra000808
Bra000810
Bra000811
Bra000813
Bra000814
Bra000815
Bra000818
Bra000821
Bra000822
Bra000826
Bra000827
Bra000837
Bra000838
Bra000839
Bra000840
Bra000842
Bra000844
Bra000847
Bra000848
Bra000854
Bra000863
Bra000864
Bra000865
Bra000867
Bra000868
Bra000869
Bra000871
Bra000873
Bra000875
Bra000876
Bra000877
Bra000878
Bra000879
Bra000880
Bra000882
Bra000883
Bra000884
Bra000885
Bra000887
Bra000889
Bra000893
Bra000895
Bra000896
Bra000898
Bra000901
Bra000902
Bra000903
Bra000905
Bra000908
Bra000910
Bra000912
Bra000913
Bra000914
Bra000915
Bra000918
Bra000923
Bra000925
Bra000926
Bra000927
Bra000928
Bra000929
Bra000930
Bra000931
Bra000937
Bra000938
Bra000939
Bra000940
Bra000942
Bra000943
Bra000945
Bra000947
Bra000949
Bra000950
Bra000952
Bra000953
Bra000954
Bra000955
Bra000959
Bra000961
Bra000963
Bra000965
Bra000969
Bra000972
Bra000973
Bra000976
Bra000977
Bra000978
Bra000981
Bra000985
Bra000986
Bra000987
Bra000990
Bra000993
Bra000996
Bra000997
Bra000998
Bra000999
Bra001000
Bra001003
Bra001004
Bra001006
Bra001008
Bra001009
Bra001017
Bra001020
Bra001021
Bra001022
Bra001023
Bra001024
Bra001028
Bra001031
Bra001032
Bra001033
Bra001034
Bra001035
Bra001036
Bra001037
Bra001046
Bra001047
Bra001049
Bra001050
Bra001052
Bra001057
Bra001058
Bra001061
Bra001062
Bra001063
Bra001064
Bra001066
Bra001067
Bra001068
Bra001073
Bra001078
Bra001079
Bra001080
Bra001083
Bra001085
Bra001086
Bra001090
Bra001091
Bra001093
Bra001094
Bra001096
Bra001098
Bra001100
Bra001102
Bra001104
Bra001106
Bra001109
Bra001114
Bra001116
Bra001121
Bra001122
Bra001123
Bra001124
Bra001126
Bra001127
Bra001129
Bra001131
Bra001133
Bra001134
Bra001136
Bra001140
Bra001143
Bra001144
Bra001145
Bra001147
Bra001149
Bra001150
Bra001154
Bra001155
Bra001156
Bra001158
Bra001159
Bra001160
Bra001161
Bra001162
Bra001163
Bra001166
Bra001168
Bra001169
Bra001174
Bra001175
Bra001176
Bra001177
Bra001179
Bra001182
Bra001189
Bra001190
Bra001191
Bra001192
Bra001198
Bra001200
Bra001201
Bra001204
Bra001207
Bra001212
Bra001213
Bra001215
Bra001218
Bra001220
Bra001221
Bra001222
Bra001223
Bra001224
Bra001225
Bra001231
Bra001232
Bra001235
Bra001240
Bra001241
Bra001244
Bra001246
Bra001247
Bra001249
Bra001253
Bra001256
Bra001258
Bra001264
Bra001265
Bra001267
Bra001271
Bra001273
Bra001274
Bra001275
Bra001280
Bra001281
Bra001284
Bra001286
Bra001289
Bra001290
Bra001291
Bra001292
Bra001293
Bra001297
Bra001298
Bra001300
Bra001301
Bra001302
Bra001306
Bra001307
Bra001313
Bra001314
Bra001316
Bra001317
Bra001320
Bra001323
Bra001324
Bra001326
Bra001331
Bra001332
Bra001333
Bra001334
Bra001335
Bra001336
Bra001337
Bra001344
Bra001345
Bra001347
Bra001348
Bra001349
Bra001350
Bra001352
Bra001354
Bra001355
Bra001357
Bra001358
Bra001359
Bra001365
Bra001366
Bra001367
Bra001368
Bra001371
Bra001372
Bra001373
Bra001374
Bra001376
Bra001377
Bra001379
Bra001389
Bra001390
Bra001391
Bra001392
Bra001393
Bra001396
Bra001397
Bra001398
Bra001401
Bra001406
Bra001407
Bra001408
Bra001410
Bra001411
Bra001414
Bra001415
Bra001416
Bra001417
Bra001420
Bra001422
Bra001423
Bra001425
Bra001426
Bra001428
Bra001429
Bra001430
Bra001431
Bra001437
Bra001443
Bra001447
Bra001448
Bra001450
Bra001451
Bra001453
Bra001454
Bra001457
Bra001459
Bra001462
Bra001463
Bra001466
Bra001467
Bra001473
Bra001474
Bra001477
Bra001481
Bra001484
Bra001485
Bra001486
Bra001487
Bra001488
Bra001489
Bra001490
Bra001492
Bra001497
Bra001499
Bra001500
Bra001501
Bra001502
Bra001505
Bra001506
Bra001507
Bra001516
Bra001518
Bra001520
Bra001522
Bra001525
Bra001530
Bra001531
Bra001532
Bra001533
Bra001534
Bra001535
Bra001536
Bra001537
Bra001539
Bra001541
Bra001542
Bra001545
Bra001547
Bra001548
Bra001549
Bra001550
Bra001552
Bra001554
Bra001559
Bra001563
Bra001565
Bra001569
Bra001570
Bra001572
Bra001573
Bra001576
Bra001577
Bra001578
Bra001579
Bra001580
Bra001581
Bra001584
Bra001587
Bra001588
Bra001592
Bra001594
Bra001595
Bra001598
Bra001599
Bra001604
Bra001606
Bra001607
Bra001613
Bra001615
Bra001616
Bra001618
Bra001624
Bra001626
Bra001628
Bra001631
Bra001634
Bra001635
Bra001636
Bra001639
Bra001640
Bra001642
Bra001643
Bra001644
Bra001645
Bra001651
Bra001653
Bra001654
Bra001660
Bra001662
Bra001664
Bra001665
Bra001671
Bra001674
Bra001676
Bra001683
Bra001684
Bra001685
Bra001686
Bra001688
Bra001692
Bra001694
Bra001697
Bra001701
Bra001702
Bra001703
Bra001704
Bra001709
Bra001710
Bra001713
Bra001714
Bra001715
Bra001716
Bra001717
Bra001718
Bra001719
Bra001721
Bra001722
Bra001724
Bra001725
Bra001728
Bra001729
Bra001732
Bra001735
Bra001738
Bra001740
Bra001742
Bra001745
Bra001746
Bra001747
Bra001752
Bra001757
Bra001761
Bra001768
Bra001769
Bra001770
Bra001771
Bra001773
Bra001774
Bra001778
Bra001779
Bra001780
Bra001782
Bra001783
Bra001784
Bra001787
Bra001789
Bra001790
Bra001794
Bra001796
Bra001797
Bra001805
Bra001806
Bra001807
Bra001809
Bra001810
Bra001812
Bra001813
Bra001814
Bra001815
Bra001816
Bra001819
Bra001820
Bra001822
Bra001824
Bra001825
Bra001828
Bra001831
Bra001832
Bra001834
Bra001840
Bra001841
Bra001842
Bra001845
Bra001846
Bra001857
Bra001862
Bra001865
Bra001866
Bra001867
Bra001868
Bra001873
Bra001874
Bra001875
Bra001877
Bra001881
Bra001882
Bra001885
Bra001886
Bra001891
Bra001894
Bra001896
Bra001897
Bra001899
Bra001900
Bra001903
Bra001905
Bra001907
Bra001909
Bra001911
Bra001913
Bra001914
Bra001919
Bra001921
Bra001923
Bra001926
Bra001929
Bra001934
Bra001935
Bra001937
Bra001942
Bra001945
Bra001946
Bra001948
Bra001949
Bra001950
Bra001952
Bra001953
Bra001958
Bra001959
Bra001960
Bra001964
Bra001971
Bra001974
Bra001975
Bra001977
Bra001982
Bra001983
Bra001984
Bra001986
Bra001988
Bra001992
Bra001995
Bra001996
Bra001999
Bra002000
Bra002001
Bra002002
Bra002003
Bra002010
Bra002011
Bra002014
Bra002018
Bra002021
Bra002022
Bra002023
Bra002025
Bra002028
Bra002030
Bra002031
Bra002038
Bra002042
Bra002043
Bra002045
Bra002049
Bra002050
Bra002053
Bra002054
Bra002058
Bra002061
Bra002063
Bra002073
Bra002075
Bra002076
Bra002078
Bra002079
Bra002080
Bra002084
Bra002086
Bra002092
Bra002093
Bra002095
Bra002096
Bra002099
Bra002101
Bra002103
Bra002104
Bra002105
Bra002106
Bra002110
Bra002112
Bra002113
Bra002115
Bra002116
Bra002118
Bra002119
Bra002123
Bra002129
Bra002133
Bra002134
Bra002135
Bra002136
Bra002138
Bra002139
Bra002140
Bra002141
Bra002142
Bra002145
Bra002150
Bra002151
Bra002152
Bra002153
Bra002154
Bra002156
Bra002158
Bra002160
Bra002162
Bra002163
Bra002165
Bra002166
Bra002167
Bra002170
Bra002171
Bra002172
Bra002173
Bra002174
Bra002175
Bra002176
Bra002177
Bra002178
Bra002179
Bra002180
Bra002182
Bra002184
Bra002186
Bra002188
Bra002189
Bra002191
Bra002192
Bra002195
Bra002196
Bra002198
Bra002201
Bra002205
Bra002206
Bra002207
Bra002208
Bra002209
Bra002212
Bra002214
Bra002215
Bra002216
Bra002218
Bra002220
Bra002221
Bra002222
Bra002223
Bra002224
Bra002225
Bra002226
Bra002227
Bra002230
Bra002232
Bra002233
Bra002236
Bra002238
Bra002239
Bra002241
Bra002244
Bra002245
Bra002248
Bra002250
Bra002254
Bra002255
Bra002257
Bra002258
Bra002259
Bra002263
Bra002264
Bra002266
Bra002271
Bra002276
Bra002278
Bra002280
Bra002281
Bra002282
Bra002283
Bra002286
Bra002288
Bra002289
Bra002290
Bra002291
Bra002293
Bra002294
Bra002298
Bra002306
Bra002307
Bra002314
Bra002316
Bra002318
Bra002319
Bra002320
Bra002322
Bra002326
Bra002327
Bra002333
Bra002336
Bra002338
Bra002345
Bra002346
Bra002350
Bra002352
Bra002354
Bra002355
Bra002357
Bra002362
Bra002366
Bra002367
Bra002368
Bra002369
Bra002370
Bra002371
Bra002373
Bra002374
Bra002375
Bra002377
Bra002381
Bra002382
Bra002384
Bra002385
Bra002386
Bra002387
Bra002397
Bra002398
Bra002400
Bra002403
Bra002404
Bra002405
Bra002406
Bra002407
Bra002408
Bra002409
Bra002411
Bra002413
Bra002415
Bra002416
Bra002421
Bra002422
Bra002423
Bra002424
Bra002425
Bra002426
Bra002427
Bra002429
Bra002432
Bra002434
Bra002436
Bra002441
Bra002442
Bra002443
Bra002450
Bra002456
Bra002457
Bra002459
Bra002460
Bra002461
Bra002464
Bra002468
Bra002470
Bra002471
Bra002472
Bra002473
Bra002479
Bra002481
Bra002483
Bra002485
Bra002495
Bra002498
Bra002501
Bra002502
Bra002508
Bra002510
Bra002512
Bra002516
Bra002519
Bra002521
Bra002522
Bra002523
Bra002524
Bra002527
Bra002528
Bra002531
Bra002533
Bra002537
Bra002543
Bra002544
Bra002554
Bra002556
Bra002559
Bra002561
Bra002562
Bra002563
Bra002564
Bra002565
Bra002566
Bra002568
Bra002569
Bra002572
Bra002574
Bra002582
Bra002584
Bra002588
Bra002589
Bra002590
Bra002593
Bra002594
Bra002596
Bra002598
Bra002600
Bra002604
Bra002606
Bra002607
Bra002608
Bra002610
Bra002616
Bra002617
Bra002622
Bra002625
Bra002626
Bra002627
Bra002629
Bra002630
Bra002632
Bra002633
Bra002634
Bra002636
Bra002637
Bra002638
Bra002639
Bra002641
Bra002645
Bra002650
Bra002651
Bra002652
Bra002653
Bra002654
Bra002656
Bra002659
Bra002661
Bra002662
Bra002664
Bra002665
Bra002668
Bra002669
Bra002670
Bra002671
Bra002672
Bra002674
Bra002675
Bra002677
Bra002678
Bra002682
Bra002683
Bra002686
Bra002692
Bra002697
Bra002698
Bra002699
Bra002703
Bra002709
Bra002714
Bra002715
Bra002717
Bra002718
Bra002719
Bra002727
Bra002728
Bra002733
Bra002737
Bra002741
Bra002743
Bra002744
Bra002747
Bra002751
Bra002752
Bra002753
Bra002755
Bra002758
Bra002762
Bra002764
Bra002766
Bra002767
Bra002773
Bra002774
Bra002775
Bra002777
Bra002778
Bra002782
Bra002785
Bra002786
Bra002788
Bra002790
Bra002791
Bra002792
Bra002793
Bra002794
Bra002796
Bra002797
Bra002798
Bra002800
Bra002801
Bra002802
Bra002804
Bra002805
Bra002806
Bra002809
Bra002816
Bra002821
Bra002822
Bra002826
Bra002828
Bra002831
Bra002832
Bra002835
Bra002837
Bra002839
Bra002840
Bra002841
Bra002843
Bra002845
Bra002849
Bra002853
Bra002855
Bra002856
Bra002861
Bra002865
Bra002868
Bra002871
Bra002872
Bra002877
Bra002878
Bra002882
Bra002886
Bra002887
Bra002890
Bra002892
Bra002893
Bra002894
Bra002896
Bra002898
Bra002899
Bra002903
Bra002904
Bra002907
Bra002908
Bra002914
Bra002917
Bra002922
Bra002925
Bra002926
Bra002927
Bra002931
Bra002934
Bra002935
Bra002937
Bra002940
Bra002942
Bra002944
Bra002945
Bra002946
Bra002947
Bra002949
Bra002950
Bra002951
Bra002953
Bra002954
Bra002960
Bra002963
Bra002964
Bra002965
Bra002966
Bra002970
Bra002973
Bra002974
Bra002975
Bra002977
Bra002979
Bra002980
Bra002982
Bra002984
Bra002986
Bra002991
Bra002992
Bra002993
Bra002995
Bra002998
Bra002999
Bra003000
Bra003001
Bra003003
Bra003005
Bra003006
Bra003007
Bra003009
Bra003011
Bra003014
Bra003015
Bra003024
Bra003025
Bra003026
Bra003027
Bra003028
Bra003029
Bra003034
Bra003035
Bra003037
Bra003039
Bra003041
Bra003044
Bra003045
Bra003046
Bra003048
Bra003049
Bra003052
Bra003053
Bra003054
Bra003055
Bra003056
Bra003057
Bra003059
Bra003062
Bra003063
Bra003064
Bra003066
Bra003068
Bra003071
Bra003077
Bra003079
Bra003082
Bra003083
Bra003084
Bra003085
Bra003089
Bra003090
Bra003091
Bra003092
Bra003093
Bra003098
Bra003102
Bra003103
Bra003105
Bra003106
Bra003110
Bra003114
Bra003115
Bra003117
Bra003120
Bra003126
Bra003132
Bra003133
Bra003134
Bra003136
Bra003137
Bra003139
Bra003142
Bra003146
Bra003147
Bra003149
Bra003150
Bra003152
Bra003154
Bra003158
Bra003159
Bra003160
Bra003162
Bra003163
Bra003164
Bra003166
Bra003171
Bra003176
Bra003177
Bra003179
Bra003180
Bra003181
Bra003184
Bra003187
Bra003188
Bra003190
Bra003191
Bra003192
Bra003193
Bra003194
Bra003196
Bra003198
Bra003199
Bra003200
Bra003201
Bra003202
Bra003204
Bra003205
Bra003206
Bra003209
Bra003210
Bra003212
Bra003217
Bra003219
Bra003220
Bra003221
Bra003225
Bra003226
Bra003229
Bra003235
Bra003236
Bra003237
Bra003239
Bra003240
Bra003241
Bra003242
Bra003245
Bra003246
Bra003251
Bra003253
Bra003254
Bra003256
Bra003257
Bra003263
Bra003265
Bra003267
Bra003268
Bra003270
Bra003273
Bra003276
Bra003280
Bra003287
Bra003289
Bra003298
Bra003299
Bra003300
Bra003301
Bra003302
Bra003303
Bra003306
Bra003313
Bra003314
Bra003315
Bra003319
Bra003320
Bra003321
Bra003322
Bra003326
Bra003336
Bra003339
Bra003340
Bra003341
Bra003342
Bra003343
Bra003344
Bra003345
Bra003346
Bra003352
Bra003355
Bra003360
Bra003362
Bra003363
Bra003364
Bra003365
Bra003371
Bra003375
Bra003376
Bra003379
Bra003381
Bra003382
Bra003383
Bra003384
Bra003385
Bra003387
Bra003388
Bra003389
Bra003393
Bra003394
Bra003395
Bra003397
Bra003398
Bra003401
Bra003402
Bra003404
Bra003406
Bra003407
Bra003409
Bra003412
Bra003416
Bra003417
Bra003418
Bra003419
Bra003423
Bra003427
Bra003430
Bra003433
Bra003434
Bra003435
Bra003436
Bra003437
Bra003438
Bra003439
Bra003442
Bra003444
Bra003447
Bra003448
Bra003450
Bra003451
Bra003454
Bra003455
Bra003457
Bra003458
Bra003460
Bra003462
Bra003464
Bra003465
Bra003466
Bra003468
Bra003469
Bra003471
Bra003472
Bra003473
Bra003474
Bra003476
Bra003481
Bra003485
Bra003487
Bra003488
Bra003490
Bra003493
Bra003497
Bra003500
Bra003502
Bra003503
Bra003504
Bra003507
Bra003509
Bra003511
Bra003512
Bra003515
Bra003518
Bra003521
Bra003522
Bra003524
Bra003525
Bra003526
Bra003527
Bra003528
Bra003529
Bra003531
Bra003534
Bra003535
Bra003539
Bra003540
Bra003541
Bra003542
Bra003543
Bra003544
Bra003547
Bra003559
Bra003560
Bra003564
Bra003566
Bra003569
Bra003570
Bra003573
Bra003575
Bra003578
Bra003581
Bra003584
Bra003585
Bra003588
Bra003589
Bra003591
Bra003592
Bra003593
Bra003594
Bra003597
Bra003598
Bra003599
Bra003600
Bra003601
Bra003604
Bra003605
Bra003606
Bra003608
Bra003609
Bra003611
Bra003612
Bra003613
Bra003614
Bra003615
Bra003617
Bra003618
Bra003622
Bra003623
Bra003624
Bra003627
Bra003628
Bra003629
Bra003632
Bra003633
Bra003634
Bra003635
Bra003636
Bra003640
Bra003644
Bra003645
Bra003646
Bra003650
Bra003652
Bra003653
Bra003655
Bra003657
Bra003658
Bra003659
Bra003661
Bra003662
Bra003663
Bra003664
Bra003665
Bra003666
Bra003670
Bra003672
Bra003675
Bra003677
Bra003678
Bra003679
Bra003680
Bra003682
Bra003683
Bra003684
Bra003691
Bra003692
Bra003693
Bra003695
Bra003696
Bra003698
Bra003699
Bra003703
Bra003705
Bra003706
Bra003707
Bra003710
Bra003711
Bra003712
Bra003713
Bra003714
Bra003715
Bra003716
Bra003718
Bra003724
Bra003726
Bra003732
Bra003735
Bra003736
Bra003742
Bra003743
Bra003751
Bra003757
Bra003758
Bra003759
Bra003761
Bra003762
Bra003764
Bra003765
Bra003766
Bra003767
Bra003769
Bra003772
Bra003774
Bra003776
Bra003777
Bra003778
Bra003779
Bra003780
Bra003781
Bra003782
Bra003785
Bra003786
Bra003787
Bra003789
Bra003790
Bra003796
Bra003799
Bra003800
Bra003802
Bra003804
Bra003806
Bra003807
Bra003808
Bra003809
Bra003814
Bra003815
Bra003822
Bra003823
Bra003828
Bra003830
Bra003831
Bra003833
Bra003834
Bra003835
Bra003840
Bra003841
Bra003842
Bra003843
Bra003849
Bra003850
Bra003851
Bra003858
Bra003859
Bra003862
Bra003864
Bra003865
Bra003866
Bra003867
Bra003869
Bra003874
Bra003876
Bra003879
Bra003881
Bra003882
Bra003883
Bra003886
Bra003888
Bra003889
Bra003891
Bra003895
Bra003899
Bra003900
Bra003903
Bra003904
Bra003906
Bra003912
Bra003913
Bra003914
Bra003916
Bra003917
Bra003923
Bra003925
Bra003926
Bra003928
Bra003934
Bra003937
Bra003938
Bra003939
Bra003942
Bra003944
Bra003946
Bra003948
Bra003949
Bra003950
Bra003951
Bra003953
Bra003957
Bra003960
Bra003962
Bra003963
Bra003964
Bra003967
Bra003969
Bra003970
Bra003975
Bra003980
Bra003981
Bra003984
Bra003988
Bra003991
Bra003993
Bra003994
Bra003997
Bra003998
Bra003999
Bra004002
Bra004004
Bra004009
Bra004010
Bra004015
Bra004016
Bra004022
Bra004024
Bra004026
Bra004027
Bra004028
Bra004029
Bra004030
Bra004031
Bra004033
Bra004034
Bra004035
Bra004040
Bra004045
Bra004049
Bra004050
Bra004051
Bra004053
Bra004054
Bra004055
Bra004056
Bra004057
Bra004058
Bra004062
Bra004064
Bra004065
Bra004066
Bra004067
Bra004068
Bra004069
Bra004070
Bra004074
Bra004075
Bra004076
Bra004077
Bra004078
Bra004079
Bra004081
Bra004085
Bra004090
Bra004092
Bra004094
Bra004095
Bra004096
Bra004098
Bra004100
Bra004101
Bra004105
Bra004106
Bra004107
Bra004108
Bra004109
Bra004116
Bra004118
Bra004120
Bra004121
Bra004123
Bra004124
Bra004125
Bra004127
Bra004128
Bra004129
Bra004130
Bra004133
Bra004135
Bra004136
Bra004137
Bra004138
Bra004140
Bra004143
Bra004144
Bra004147
Bra004149
Bra004155
Bra004158
Bra004159
Bra004160
Bra004165
Bra004166
Bra004167
Bra004168
Bra004171
Bra004172
Bra004173
Bra004175
Bra004177
Bra004188
Bra004191
Bra004192
Bra004193
Bra004206
Bra004207
Bra004209
Bra004216
Bra004217
Bra004220
Bra004222
Bra004223
Bra004225
Bra004226
Bra004227
Bra004229
Bra004232
Bra004235
Bra004236
Bra004237
Bra004239
Bra004243
Bra004244
Bra004245
Bra004249
Bra004250
Bra004251
Bra004252
Bra004253
Bra004254
[truncated: 15,867 more rows]

## Sheet: edgeR
GeneID	logFC	logCPM	F	PValue	FDR
Bra027987	7.13829	5.35391	6441.04	0	0
Bra035742	7.06856	4.23109	3038.9	0	0
Bra015548	6.45686	5.51036	6930.44	0	0
Bra032590	-6.35958	4.77479	4589.5	0	0
Bra017656	-6.20883	3.57906	2036.4	0	0
Bra034624	-6.14003	4.46934	3739.67	0	0
Bra028290	-6.08938	5.7723	8786.55	0	0
Bra011529	-5.98953	5.23776	6046.31	0	0
Bra003696	5.93982	5.41973	6270.99	0	0
Bra015873	-5.91321	3.16557	1506.05	0	0
Bra006086	5.90527	6.50088	12719.5	0	0
Bra033648	5.80872	5.16182	5210.35	0	0
Bra001264	5.75699	4.20726	2761.94	0	0
Bra007887	-5.66236	5.27544	6016.11	0	0
Bra012784	-5.59939	5.05253	5154.83	0	0
Bra032901	-5.32609	4.06773	2629.94	0	0
Bra013026	5.24789	7.28499	18601.2	0	0
Bra021965	-5.24782	6.66235	13845.4	0	0
Bra028291	-5.2145	4.11244	2679.97	0	0
Bra020709	5.12879	4.50071	3167.5	0	0
Bra030910	-5.10174	4.12294	2661.9	0	0
Bra022981	-5.09664	3.41908	1645.33	0	0
Bra025297	-5.07245	10.273	60747.9	0	0
Bra027602	-5.00683	6.7417	14001.9	0	0
Bra018065	4.99025	7.1402	16554.4	0	0
Bra007334	-4.90859	7.59627	21645.2	0	0
Bra000093	-4.90605	3.46163	1651.78	0	0
Bra025728	4.86997	8.93221	36895.1	0	0
Bra030156	4.78968	3.76069	1808.6	0	0
Bra025730	4.75723	4.9385	3962	0	0
Bra004994	-4.74108	6.93064	14895.4	0	0
Bra001122	4.72704	6.26208	9554.49	0	0
Bra004503	-4.70985	4.24157	2737.56	0	0
Bra022668	4.68068	4.391	2779.29	0	0
Bra000903	-4.67344	6.08108	9068.08	0	0
Bra027465	4.65802	4.95726	3949.3	0	0
Bra029040	-4.6365	6.45262	11142.1	0	0
Bra024126	-4.60582	5.20158	4980.1	0	0
Bra006796	4.52127	6.0806	8274.39	0	0
Bra003588	-4.52108	3.42368	1513.83	0	0
Bra007195	-4.4711	7.13642	15786.8	0	0
Bra028980	4.45859	4.17975	2301.5	0	0
Bra040169	-4.44505	3.88904	2040.44	0	0
Bra000382	4.41728	4.23274	2373.31	0	0
Bra013630	-4.39132	3.93573	2087.69	0	0
Bra030167	4.3824	4.45782	2754.42	0	0
Bra026606	-4.37962	3.46961	1519.86	0	0
Bra015922	-4.37148	5.05242	4321	0	0
Bra003713	-4.36234	5.08749	4412.77	0	0
Bra033324	-4.35366	5.12734	4521.72	0	0
Bra032293	-4.35067	5.07448	4366.4	0	0
Bra007885	-4.32615	6.32987	9779.47	0	0
Bra016233	-4.31888	4.95245	3999.99	0	0
Bra024539	-4.31681	3.71019	1763.83	0	0
Bra000876	4.31427	5.23583	4475.66	0	0
Bra009250	4.27305	5.28875	4598.83	0	0
Bra005071	4.25396	5.25338	4474.65	0	0
Bra029990	-4.24789	5.69388	6466.31	0	0
Bra009294	-4.23672	5.36971	5171.55	0	0
Bra006567	4.23137	6.16236	8193.47	0	0
Bra031255	-4.21253	3.69698	1712.71	0	0
Bra039099	-4.20807	6.10967	8406.87	0	0
Bra023676	4.18407	6.10925	7855.38	0	0
Bra017301	-4.16586	5.48593	5494.53	0	0
Bra002719	-4.13847	7.09499	14299.3	0	0
Bra029278	4.13775	5.18444	4166.47	0	0
Bra016254	-4.13633	5.20461	4540.32	0	0
Bra001752	-4.12217	5.0874	4189.66	0	0
Bra011636	-4.08089	5.31922	4830.25	0	0
Bra004819	4.05087	4.59398	2797.38	0	0
Bra021110	-4.05064	7.56482	17634.9	0	0
Bra013059	4.04855	4.80211	3182.6	0	0
Bra024662	-4.0351	8.04832	21785	0	0
Bra013019	-4.02742	4.05276	2097.3	0	0
Bra010096	-4.02105	4.13273	2215.65	0	0
Bra025325	-3.99724	5.90551	7037.8	0	0
Bra011292	-3.99505	4.59327	2989.01	0	0
Bra012910	-3.99197	6.60827	10535.9	0	0
Bra002718	-3.97868	7.5743	17362	0	0
Bra030507	-3.9511	5.70039	6055.8	0	0
Bra027651	-3.94621	3.8967	1843.03	0	0
Bra003273	3.94578	7.48534	15849.3	0	0
Bra031074	3.91421	6.80369	10974.4	0	0
Bra007315	3.90858	6.76135	10695.1	0	0
Bra025951	-3.90401	5.67035	5856.51	0	0
Bra034140	-3.89684	6.83292	11651	0	0
Bra008435	-3.89491	6.9979	12735	0	0
Bra004771	3.88657	7.79171	18002.7	0	0
Bra010035	-3.87804	4.91749	3531.16	0	0
Bra012479	-3.86496	5.93432	6929.93	0	0
Bra016495	-3.85135	8.29451	22799.1	0	0
Bra011135	-3.84063	5.61767	5554.07	0	0
Bra016191	-3.81106	6.05345	7355.96	0	0
Bra002283	-3.80593	4.32168	2398.28	0	0
Bra031470	3.80484	4.04915	1822.01	0	0
Bra003969	-3.79784	5.43073	4824.91	0	0
Bra000158	-3.79321	8.28966	22310.2	0	0
Bra004633	-3.78243	5.93052	6755.1	0	0
Bra002189	3.78049	5.45452	4561.82	0	0
Bra005079	-3.77275	5.18166	4076.37	0	0
Bra002355	3.7725	4.67825	2754.25	0	0
Bra000311	3.7446	5.56521	4883.3	0	0
Bra039070	-3.73953	11.2673	50362.6	0	0
Bra037499	3.73546	4.72831	2812.06	0	0
Bra015986	-3.735	6.49775	9205.46	0	0
Bra000670	-3.73137	6.52428	9333.22	0	0
Bra022935	-3.7277	4.28388	2284.41	0	0
Bra038832	3.72604	4.50792	2448.38	0	0
Bra020820	3.70358	4.79886	2912.68	0	0
Bra038242	3.69973	3.99984	1710.73	0	0
Bra011181	-3.68909	5.37774	4520.19	0	0
Bra003670	-3.68686	7.84197	17887.7	0	0
Bra000310	3.68109	5.9403	6221.85	0	0
Bra033809	3.66965	4.68421	2687.44	0	0
Bra040020	3.66598	4.18528	1934.42	0	0
Bra004330	-3.6599	5.24855	4117.37	0	0
Bra008025	3.65905	4.73163	2757.77	0	0
Bra022772	-3.65027	7.30603	13808.6	0	0
Bra008668	-3.64653	4.50179	2576.33	0	0
Bra021861	-3.63967	5.9869	6721.33	0	0
Bra017342	-3.636	4.80728	3086.61	0	0
Bra005572	-3.6323	5.62038	5234.33	0	0
Bra001907	-3.62277	4.12856	1988	0	0
Bra020140	3.61675	5.50342	4503.75	0	0
Bra031048	-3.6109	6.55485	9134.01	0	0
Bra012088	-3.60224	6.15471	7314.86	0	0
Bra027981	-3.59576	5.38946	4426.84	0	0
Bra000775	3.59489	5.33584	4001.42	0	0
Bra005447	-3.59289	4.21479	2090.37	0	0
Bra036774	-3.59219	6.19557	7462.82	0	0
Bra018703	-3.58202	5.37207	4358.22	0	0
Bra025736	-3.5814	4.34813	2291.96	0	0
Bra022436	-3.57409	5.09873	3642.32	0	0
Bra017112	3.57227	4.00139	1650.57	0	0
Bra039974	3.56496	3.86572	1497.58	0	0
Bra020011	-3.56431	4.93482	3261.98	0	0
Bra024717	3.5611	4.83731	2858.92	0	0
Bra001067	-3.56017	4.02178	1807.49	0	0
Bra007039	-3.55256	5.40914	4421.4	0	0
Bra028091	3.54963	6.06654	6464.15	0	0
Bra012058	-3.54422	6.49257	8639.56	0	0
Bra030917	3.53899	4.6386	2512.45	0	0
Bra035641	-3.5229	6.99922	11311.8	0	0
Bra014396	-3.52148	5.42766	4429.36	0	0
Bra017040	-3.51363	8.31484	20404.9	0	0
Bra005125	-3.51346	8.37275	20866.1	0	0
Bra030589	-3.50613	4.86264	3063.13	0	0
Bra032591	-3.50403	7.99765	17902.2	0	0
Bra035148	-3.50147	6.46038	8372.72	0	0
Bra007444	-3.5013	8.41357	21091.8	0	0
Bra007696	-3.49901	6.01238	6523.64	0	0
Bra025547	3.49509	6.61168	8652.98	0	0
Bra039217	-3.49464	7.85441	16795.1	0	0
Bra000660	-3.49086	8.26396	19835.4	0	0
Bra038538	-3.48932	4.5131	2469.97	0	0
Bra000140	-3.48164	4.67378	2713.47	0	0
Bra024851	-3.48156	5.80555	5661.82	0	0
Bra035833	-3.48061	3.84735	1561.47	0	0
Bra031065	-3.47906	6.61951	9065.7	0	0
Bra034666	3.47902	5.87634	5591.89	0	0
Bra031690	-3.47171	6.87921	10436	0	0
Bra010076	3.46765	5.09306	3275.21	0	0
Bra017839	-3.46491	7.54357	14474.2	0	0
Bra033022	-3.45198	10.7567	40200.4	0	0
Bra004718	3.44173	8.23708	18741.6	0	0
Bra017628	-3.43096	6.40742	7936.07	0	0
Bra007798	-3.42501	3.81408	1498.93	0	0
Bra013123	3.41097	9.30205	27015.9	0	0
Bra007205	-3.40299	9.22633	26772.1	0	0
Bra040374	-3.40243	5.06947	3375.7	0	0
Bra032665	-3.378	3.94196	1611.36	0	0
Bra037247	-3.37098	4.33899	2125.08	0	0
Bra033436	-3.37004	6.56753	8457.13	0	0
Bra013426	3.36868	5.53073	4238.66	0	0
Bra032288	-3.36146	4.47679	2315.31	0	0
Bra025756	3.35621	5.07689	3125.25	0	0
Bra029145	-3.34272	4.37331	2157.29	0	0
Bra000508	-3.33925	7.88251	15998.7	0	0
Bra007446	-3.33366	5.54303	4489.97	0	0
Bra020862	3.33076	4.06062	1596.37	0	0
Bra037741	3.32807	5.38884	3795.16	0	0
Bra006085	3.32238	5.01794	2969.15	0	0
Bra022723	-3.31727	7.44615	13072.5	0	0
Bra029505	-3.31641	6.47285	7881.78	0	0
Bra029031	-3.31586	4.93058	2990.35	0	0
Bra022905	-3.3134	5.76892	5201.98	0	0
Bra012334	3.30191	4.25366	1812.51	0	0
Bra025917	-3.29949	6.01592	6087.01	0	0
Bra006809	3.29718	5.6792	4584.27	0	0
Bra021614	3.29041	5.84873	5137.19	0	0
Bra039434	-3.27486	5.10013	3289.29	0	0
Bra040158	-3.27201	5.28007	3692.55	0	0
Bra018409	-3.26679	4.62444	2444.78	0	0
Bra027044	-3.25573	5.64329	4667.34	0	0
Bra032371	3.25538	4.05025	1542.32	0	0
Bra014598	-3.24387	5.3675	3861.67	0	0
Bra007603	-3.23874	4.96722	2974.77	0	0
Bra000635	-3.23425	4.16064	1784.16	0	0
Bra005891	-3.22209	6.97579	9983.57	0	0
Bra015133	3.21197	4.15402	1635.01	0	0
Bra019644	3.20755	6.63462	7891.74	0	0
Bra002999	-3.19874	11.2281	39000	0	0
Bra010099	-3.18874	6.27664	6744.15	0	0
Bra018383	-3.17014	6.33124	6896.87	0	0
Bra006851	3.16584	4.14877	1601.35	0	0
Bra031080	-3.16575	4.35592	1994.75	0	0
Bra008438	-3.15725	4.32086	1940.52	0	0
Bra032622	-3.15627	7.85226	14615.2	0	0
Bra031210	3.15475	9.27255	23868.6	0	0
Bra027047	-3.15323	6.10071	6028.99	0	0
Bra008267	-3.15286	4.41594	2067.12	0	0
Bra011830	-3.14734	5.17712	3290.57	0	0
Bra012149	-3.13779	7.43722	12073.2	0	0
Bra026991	3.13603	5.81786	4744.86	0	0
Bra017093	3.13465	4.35538	1833.17	0	0
Bra018477	-3.13453	6.9709	9591.17	0	0
Bra007099	-3.13188	6.59466	7813.97	0	0
Bra016593	-3.12928	5.91962	5351.98	0	0
Bra001422	-3.12496	6.92924	9352.56	0	0
Bra037739	3.12376	4.48077	1979.95	0	0
Bra019599	-3.11043	5.55347	4142.97	0	0
Bra021636	3.09547	4.6522	2172	0	0
Bra006727	-3.09239	4.41859	2021.2	0	0
Bra039038	-3.09183	4.66576	2341.13	0	0
Bra037112	3.09166	7.71328	12979.4	0	0
Bra038219	-3.08717	4.68543	2364.41	0	0
Bra013476	-3.08374	9.13524	22471	0	0
Bra026495	-3.07264	6.96617	9313.32	0	0
Bra037477	-3.06295	4.46939	2057.57	0	0
Bra025409	3.06287	4.13372	1522.39	0	0
Bra035236	-3.05456	8.20244	16050.4	0	0
Bra002316	3.04715	4.60933	2075.56	0	0
Bra017464	-3.03824	6.777	8297.78	0	0
Bra025141	3.03173	4.58476	2031.43	0	0
Bra006403	-3.02526	5.28707	3356.34	0	0
Bra000315	3.02335	4.25588	1634.37	0	0
Bra003194	-3.02015	6.50911	7100.59	0	0
Bra026084	-3.01548	5.06806	2900.26	0	0
Bra004841	-3.01287	6.67588	7761.06	0	0
Bra003363	-3.01068	4.82731	2491.13	0	0
Bra000875	3.00937	6.35529	6217.09	0	0
Bra022805	-3.00204	5.51129	3842.32	0	0
Bra016561	-2.99569	7.48365	11555.2	0	0
Bra021569	-2.99245	5.34348	3428.56	0	0
Bra027519	-2.98734	4.35535	1852.82	0	0
Bra013815	-2.98278	5.97645	5207.24	0	0
Bra010015	2.9795	5.47068	3489.37	0	0
Bra001155	-2.97726	5.02292	2771	0	0
Bra014427	-2.97655	6.2006	5905.22	0	0
Bra013183	-2.97535	10.8576	32262.2	0	0
Bra006833	-2.97304	4.65525	2209.94	0	0
Bra022594	-2.96703	4.49148	1999.18	0	0
Bra021259	-2.96651	4.14498	1584.13	0	0
Bra000811	-2.96514	5.24655	3182.54	0	0
Bra008667	-2.96342	7.63742	12185.4	0	0
Bra039012	-2.96079	5.85912	4773.36	0	0
Bra008037	-2.95222	6.49779	6840.35	0	0
Bra034818	-2.95187	4.11929	1545.26	0	0
Bra038521	-2.94623	6.38492	6429.52	0	0
Bra018750	2.94527	6.56567	6772.84	0	0
Bra007864	2.92401	6.68555	7175.38	0	0
Bra011180	-2.92208	4.6738	2185.12	0	0
Bra009184	-2.91642	9.29772	21621.8	0	0
Bra029259	-2.91632	4.44223	1899.44	0	0
Bra031401	2.91211	4.91113	2352.36	0	0
Bra024953	-2.91113	4.79396	2334.39	0	0
Bra027838	-2.90925	6.11534	5456.21	0	0
Bra032309	-2.90812	5.74413	4313.4	0	0
Bra009302	-2.90586	4.69422	2195.94	0	0
Bra009221	2.9019	5.46173	3352.1	0	0
Bra021208	-2.896	5.43492	3477.25	0	0
Bra026804	-2.89439	5.56178	3785.76	0	0
Bra007202	-2.89217	4.77641	2291.21	0	0
Bra038785	2.88806	4.73294	2088.83	0	0
Bra019686	2.88237	8.76541	17664.7	0	0
Bra037578	-2.88066	4.48319	1914.02	0	0
Bra033938	-2.87303	6.08895	5283.02	0	0
Bra009735	-2.87238	4.91893	2471.52	0	0
Bra028635	2.86842	4.87262	2252.75	0	0
Bra027920	-2.86376	6.96823	8443.71	0	0
Bra019357	-2.85099	5.50854	3575.18	0	0
Bra015048	-2.85036	4.28314	1655.39	0	0
Bra034592	-2.84992	6.57884	6794.53	0	0
Bra015727	-2.84792	6.42263	6254.56	0	0
Bra006694	2.83707	4.41284	1682.06	0	0
Bra038734	-2.83604	6.67624	7132.75	0	0
Bra003780	-2.83546	4.8314	2304.14	0	0
Bra023434	-2.83384	5.35441	3207.17	0	0
Bra016164	-2.83192	6.89745	8013.52	0	0
Bra006709	-2.8318	6.32957	5907.28	0	0
Bra025439	-2.82712	8.26457	14622.1	0	0
Bra029641	-2.81494	4.25612	1597.37	0	0
Bra028419	-2.81365	7.26662	9541.25	0	0
Bra040610	2.81058	4.66067	1929.32	0	0
Bra029666	2.7975	4.91804	2240.21	0	0
Bra031195	-2.79441	4.79086	2204.65	0	0
Bra038360	-2.79435	6.56176	6547.42	0	0
Bra032747	-2.79421	5.698	3958.26	0	0
Bra025683	-2.79233	7.66778	11304.6	0	0
Bra015307	2.79173	4.35603	1583.4	0	0
Bra037113	2.7889	6.32058	5500	0	0
Bra005424	-2.78832	10.6717	27892	0	0
Bra020188	-2.78478	4.74086	2129.32	0	0
Bra008101	-2.7835	7.8712	12252.9	0	0
Bra015346	-2.78344	5.52967	3508.67	0	0
Bra002049	-2.77774	5.34914	3108.04	0	0
Bra013714	2.77732	5.97188	4479.57	0	0
Bra014297	-2.77004	5.8371	4292.08	0	0
Bra026466	-2.76352	5.75345	4044.03	0	0
Bra024318	-2.76085	6.42396	5987.64	0	0
Bra010055	-2.75478	5.42921	3232.51	0	0
Bra017278	-2.75344	5.74251	3997.05	0	0
Bra003212	-2.74649	4.98768	2426.45	0	0
Bra034321	-2.74622	6.60353	6537.35	0	0
Bra037542	-2.73713	6.37774	5774.35	0	0
Bra037386	-2.73562	4.31116	1595.91	0	0
Bra032734	2.73335	5.74646	3766.2	0	0
Bra013579	-2.72719	6.83498	7338.15	0	0
Bra022191	-2.72571	5.33896	3008.27	0	0
Bra037471	-2.7159	4.80122	2132.79	0	0
Bra003187	-2.71571	6.43306	5873.24	0	0
Bra028533	-2.71452	6.64288	6566.22	0	0
Bra008806	-2.712	5.53773	3398.12	0	0
Bra012972	-2.70934	4.56749	1849.63	0	0
Bra000571	-2.70641	7.348	9353.88	0	0
Bra019718	-2.70276	6.51001	6070.66	0	0
Bra030674	-2.70125	5.44061	3166.7	0	0
Bra006949	-2.6993	6.84623	7266.67	0	0
Bra017980	-2.69697	6.78156	7011.52	0	0
Bra036022	-2.69647	5.96349	4484.04	0	0
Bra016250	-2.69314	7.81535	11379.9	0	0
Bra040373	-2.69299	4.53776	1802.49	0	0
Bra036048	-2.6929	6.28625	5365.2	0	0
Bra010922	-2.684	7.23626	8761.66	0	0
Bra034466	-2.68186	8.64034	15391.7	0	0
Bra013009	2.68091	5.40537	2902.58	0	0
Bra014426	-2.67486	4.87387	2178.02	0	0
Bra012964	2.67319	6.58654	5975.53	0	0
Bra019406	-2.67268	7.12975	8270.75	0	0
Bra011573	2.67135	7.46593	9390.56	0	0
Bra020827	-2.66481	5.3819	2989.7	0	0
Bra040061	-2.66397	4.36231	1593.63	0	0
Bra017390	2.65616	5.4814	3008.9	0	0
Bra037115	2.65556	6.38656	5315.22	0	0
Bra013566	2.65424	4.82284	1968.04	0	0
Bra034163	2.65228	6.94514	7194.41	0	0
Bra031554	-2.64798	4.59648	1821.64	0	0
Bra002400	-2.64671	6.24746	5123.51	0	0
Bra009013	-2.63491	4.31648	1520.28	0	0
Bra032356	-2.63348	5.18978	2604.27	0	0
Bra001774	2.62056	5.81206	3714.09	0	0
Bra022815	2.61769	7.78394	10472.4	0	0
Bra026156	-2.61429	8.87256	15932	0	0
Bra018183	-2.61316	5.28181	2728.64	0	0
Bra030182	-2.61009	12.1693	32215.1	0	0
Bra030253	-2.60924	6.24559	5016.42	0	0
Bra017148	-2.60718	7.44178	9210.68	0	0
Bra014636	2.60249	6.24878	4788.14	0	0
Bra031387	2.601	5.1758	2397.76	0	0
Bra011749	-2.60053	6.51541	5741.55	0	0
Bra014550	2.60046	6.15404	4538.66	0	0
Bra004477	2.60034	5.52033	2999.48	0	0
Bra029712	-2.59141	7.9044	11116.4	0	0
Bra033092	2.58935	5.25188	2501.49	0	0
Bra020433	-2.58348	9.00391	16280.6	0	0
Bra006691	-2.57926	4.99298	2224.71	0	0
Bra016914	-2.57754	4.33944	1498.13	0	0
Bra037954	2.57619	7.0294	7192.49	0	0
Bra027664	-2.56627	5.11796	2394.45	0	0
Bra007162	-2.55883	5.9141	4025.56	0	0
Bra010627	2.55869	5.43941	2774.41	0	0
Bra019002	-2.55833	5.6287	3326.25	0	0
Bra026364	-2.55056	6.93248	6972.43	0	0
Bra033239	-2.55	5.00678	2208.6	0	0
Bra005425	-2.54779	11.4082	27338.9	0	0
Bra013034	-2.54634	6.14588	4578.88	0	0
Bra024087	-2.54451	4.40868	1541.33	0	0
Bra003375	-2.54051	6.2194	4748.49	0	0
Bra026653	-2.54041	4.87265	2020.21	0	0
Bra024611	-2.53825	7.10483	7545.02	0	0
Bra027431	-2.53154	5.17714	2437.71	0	0
Bra003306	-2.52743	4.9981	2166.88	0	0
Bra035897	2.52204	6.21987	4499.88	0	0
Bra038517	-2.51779	7.67309	9649.45	0	0
Bra020313	-2.51478	6.08529	4344.57	0	0
Bra002322	2.51428	5.39217	2628.47	0	0
Bra021831	2.51155	5.71334	3263.78	0	0
Bra035415	-2.50942	5.3966	2765.81	0	0
Bra015053	-2.50915	8.12094	11480.3	0	0
Bra035505	-2.50295	6.97821	6936.51	0	0
Bra020179	-2.5015	6.13223	4423.26	0	0
Bra015915	-2.49964	6.40763	5118.6	0	0
Bra025400	-2.49904	4.80242	1891.82	0	0
Bra001457	-2.49781	7.43446	8590.83	0	0
Bra036278	-2.49432	7.11031	7365.9	0	0
Bra006598	-2.49168	5.50936	2943.22	0	0
Bra023103	-2.48985	6.06876	4244.27	0	0
Bra010880	-2.48626	6.14389	4411.17	0	0
Bra018344	-2.47711	4.82335	1891.11	0	0
Bra018216	-2.4749	5.71918	3364.58	0	0
Bra010879	-2.46718	5.75837	3435.5	0	0
Bra034845	-2.46663	7.00971	6888.89	0	0
Bra037647	2.46174	4.566	1515.69	0	0
Bra002559	-2.45866	7.62119	9094.4	0	0
Bra016126	-2.44909	6.11448	4244	0	0
Bra036269	-2.44558	8.2461	11533.9	0	0
Bra001905	-2.44518	4.53762	1566.78	0	0
Bra025280	-2.44471	5.15549	2281.59	0	0
Bra013985	-2.43182	6.21186	4423.78	0	0
Bra009876	-2.42856	7.71601	9278.35	0	0
Bra011339	2.40799	6.22532	4208.47	0	0
Bra008695	-2.40631	7.77918	9381.82	0	0
Bra033198	-2.4061	5.81078	3425.32	0	0
Bra015912	-2.40477	5.08437	2126.64	0	0
Bra031656	-2.40474	9.13958	15032.7	0	0
Bra035002	-2.40384	8.21036	11069.5	0	0
Bra035384	-2.40294	7.7961	9420.42	0	0
Bra022161	2.40251	6.56874	5044.51	0	0
Bra023998	-2.39344	6.52028	5071.05	0	0
Bra021101	-2.3903	7.41493	7938.24	0	0
Bra023006	-2.39028	6.22717	4343.82	0	0
Bra002984	-2.38967	8.34714	11514.2	0	0
Bra023126	-2.38578	4.66655	1627.8	0	0
Bra020800	2.38	6.21671	4116.05	0	0
Bra016237	-2.37986	6.96644	6363.94	0	0
Bra035067	-2.37939	8.51385	12125.7	0	0
Bra037368	-2.37656	4.9128	1872.38	0	0
Bra038205	-2.37601	4.64107	1594.17	0	0
Bra010819	-2.37152	5.85813	3456.81	0	0
Bra023044	-2.36935	4.57673	1528.58	0	0
Bra039021	-2.36916	5.71115	3132.18	0	0
Bra007328	-2.36542	4.74754	1686.02	0	0
Bra017722	-2.36254	5.62431	2937.56	0	0
Bra036864	-2.36124	4.75377	1687.08	0	0
Bra015025	-2.36118	7.59316	8410.6	0	0
Bra018907	-2.35804	7.30102	7372.6	0	0
Bra012779	-2.35308	8.26643	10908.8	0	0
Bra026237	-2.34893	6.20263	4170.15	0	0
Bra021175	-2.34887	4.63657	1562.74	0	0
Bra035365	-2.34734	6.42491	4685.04	0	0
Bra000056	-2.34578	5.68761	3033.51	0	0
Bra035933	2.34291	6.69046	5197.27	0	0
Bra025924	-2.34228	7.33728	7413.09	0	0
Bra039058	-2.34148	5.94776	3590.26	0	0
Bra027243	-2.33941	9.82754	17180.6	0	0
Bra017920	-2.33929	7.94838	9585.12	0	0
Bra030284	2.33918	8.37991	11044.1	0	0
Bra002564	-2.33834	4.60886	1526.84	0	0
Bra009037	-2.33475	5.81257	3273.88	0	0
Bra038281	-2.3345	8.41799	11358.4	0	0
Bra014848	-2.33212	5.594	2822.47	0	0
Bra005984	-2.32971	6.47359	4742.68	0	0
Bra025207	-2.32912	4.70399	1605.65	0	0
Bra037137	-2.32667	5.48002	2597.72	0	0
Bra005641	2.32342	5.02727	1844.71	0	0
Bra029093	2.30745	5.82652	3102.94	0	0
Bra003975	-2.30529	6.43582	4576.68	0	0
Bra006975	2.30524	6.52975	4633.46	0	0
Bra001789	-2.30336	7.91589	9217.09	0	0
Bra009774	-2.29465	6.90394	5819.56	0	0
Bra036862	-2.29383	5.87706	3322.58	0	0
Bra032345	-2.29019	11.4401	22738.8	0	0
Bra032902	-2.29	6.81479	5542.12	0	0
Bra003115	-2.28899	4.65141	1514.66	0	0
Bra029642	-2.28587	5.19505	2109.26	0	0
Bra026797	-2.27471	5.51676	2572.39	0	0
Bra014977	-2.26993	5.54698	2616.7	0	0
Bra009062	-2.26585	4.91553	1741.35	0	0
Bra020123	2.26462	5.9271	3220.57	0	0
Bra021480	-2.26408	5.30091	2225.33	0	0
Bra001639	-2.26386	4.71218	1543.79	0	0
Bra034648	-2.26166	8.43775	10837.8	0	0
Bra032951	-2.25926	5.47088	2464.54	0	0
Bra028554	2.25725	5.22128	2001.57	0	0
Bra023398	-2.25657	6.42653	4404.67	0	0
Bra026230	2.25615	6.23614	3831.11	0	0
Bra007906	-2.25015	8.35648	10446.2	0	0
Bra013678	-2.24639	7.67209	8012.54	0	0
Bra028996	2.24276	5.67529	2681.63	0	0
Bra018346	-2.24138	7.72438	8157.68	0	0
Bra017516	-2.24107	4.71834	1524.23	0	0
Bra017005	2.23925	5.04741	1766.63	0	0
Bra010917	-2.2352	7.44806	7217.31	0	0
Bra009393	2.23272	5.86723	3027.64	0	0
Bra025664	-2.23183	5.38348	2290.19	0	0
Bra027083	-2.23127	11.3418	21340.6	0	0
Bra010706	2.2266	6.69509	4803.2	0	0
Bra011656	-2.22469	7.76191	8179.97	0	0
Bra013660	-2.2217	5.08754	1883.66	0	0
Bra037181	-2.21691	6.8539	5363.76	0	0
Bra032845	-2.21502	6.1313	3659.11	0	0
Bra025713	-2.214	5.10579	1896.33	0	0
Bra001320	-2.21258	5.52941	2484.15	0	0
Bra018469	2.20823	6.63646	4592.86	0	0
Bra028379	-2.20445	5.8154	2994.77	0	0
Bra016060	2.20339	5.37685	2129.35	0	0
Bra015908	-2.20213	9.19424	13122.4	0	0
Bra014674	-2.19954	5.19963	1993.89	0	0
Bra033077	-2.19848	4.86953	1615.74	0	0
Bra035732	-2.19442	6.16098	3660.25	0	0
Bra007888	-2.19415	5.20141	1988.22	0	0
Bra036948	-2.19212	7.7611	7980.9	0	0
Bra021912	-2.18808	5.46438	2334.21	0	0
Bra032485	-2.18417	5.41544	2256.25	0	0
Bra014665	-2.18217	5.29982	2095.28	0	0
Bra022437	-2.18139	7.00755	5646.81	0	0
Bra024879	-2.17894	6.86619	5247.61	0	0
Bra031349	2.17864	5.13287	1790.6	0	0
Bra027569	-2.17379	6.04672	3387.1	0	0
Bra018492	2.16664	6.00135	3156.01	0	0
Bra001086	2.16659	9.45802	13567.3	0	0
Bra012676	2.16442	8.25778	9273.33	0	0
Bra019295	-2.16414	6.17637	3610.02	0	0
Bra035320	2.15817	8.80923	11152.5	0	0
Bra022976	-2.15537	12.3403	23415.5	0	0
Bra029301	-2.15055	6.50226	4233.26	0	0
Bra018964	-2.14861	5.38055	2148.75	0	0
Bra039945	-2.14829	6.09827	3419.23	0	0
Bra031927	-2.14737	8.42576	9880.22	0	0
Bra031029	-2.14595	5.27656	2012.02	0	0
Bra003680	2.14189	6.08541	3249.34	0	0
Bra038612	-2.13791	8.2036	9066.9	0	0
Bra016683	-2.13621	6.36037	3891.47	0	0
Bra011282	-2.13282	5.67655	2589.24	0	0
Bra030669	2.13173	4.90391	1492.55	0	0
Bra034164	2.13046	6.11845	3279.11	0	0
Bra001921	2.12546	6.18371	3386.92	0	0
Bra002944	-2.12067	7.76345	7554.18	0	0
Bra015570	2.11688	7.48517	6545.03	0	0
Bra031127	-2.11482	4.98553	1631.39	0	0
Bra033813	-2.11093	6.8939	5048.25	0	0
Bra015531	-2.10999	5.38331	2092.65	0	0
Bra010807	-2.10673	12.3568	22509.3	0	0
Bra040924	2.10668	5.13468	1700.74	0	0
Bra005527	2.10532	5.18568	1756.69	0	0
Bra025832	2.1041	5.49558	2140.82	0	0
Bra011316	-2.10327	5.47486	2203.09	0	0
Bra016789	2.10076	5.00065	1551.36	0	0
Bra013794	-2.09881	5.1234	1760.01	0	0
Bra029309	2.09406	5.6538	2367.9	0	0
Bra004689	-2.09367	5.95688	3021.08	0	0
Bra006997	-2.09228	5.26987	1922.92	0	0
Bra010453	-2.0913	8.40089	9360.19	0	0
Bra014671	-2.09084	9.16436	11881.9	0	0
Bra019584	-2.09031	6.24187	3528.02	0	0
Bra006795	2.08727	7.1052	5352.12	0	0
Bra016252	-2.08696	7.03453	5314.95	0	0
Bra001635	-2.08617	5.6966	2532.04	0	0
Bra034941	2.08554	8.01303	7942.53	0	0
Bra016860	-2.08383	5.95524	2992.01	0	0
Bra025371	-2.08154	6.06853	3194.31	0	0
Bra001488	2.08045	5.04932	1576.22	0	0
Bra017085	2.07827	5.52593	2144.05	0	0
Bra032795	-2.06836	4.97413	1561.85	0	0
Bra011554	-2.0681	6.28547	3547.88	0	0
Bra025450	-2.06527	7.98238	7866.43	0	0
Bra034817	-2.0613	6.43981	3820.96	0	0
Bra024750	2.06089	5.93689	2794.65	0	0
Bra000708	-2.05771	9.21545	11715.6	0	0
Bra004137	2.05767	8.13307	8121.71	0	0
Bra038111	-2.05223	7.83778	7352.05	0	0
Bra011650	-2.05015	5.45733	2089.82	0	0
Bra007841	-2.04644	6.78638	4535.94	0	0
Bra017524	-2.04468	5.06935	1629.45	0	0
Bra014838	2.04325	5.80983	2532.94	0	0
Bra024339	-2.0417	7.65586	6772.01	0	0
Bra016216	-2.03855	5.12053	1674.2	0	0
Bra037811	-2.03743	6.0532	3057.27	0	0
Bra011174	-2.03647	5.39829	1993.63	0	0
Bra029848	2.03316	5.61037	2196.62	0	0
Bra001653	2.03107	8.40072	8756.7	0	0
Bra026944	2.03104	5.42669	1932.89	0	0
Bra026099	-2.02747	10.5945	15673.8	0	0
Bra017462	-2.02672	6.08055	3077.98	0	0
Bra004534	-2.02391	5.29448	1847.85	0	0
Bra030095	-2.02209	5.89286	2737.28	0	0
Bra028523	-2.01001	7.80511	7003.71	0	0
Bra038227	-2.00854	5.4895	2063.61	0	0
Bra033070	-2.00766	5.48862	2060.84	0	0
Bra017823	-2.0073	6.88244	4613.19	0	0
Bra012008	-2.00651	6.56391	3891.29	0	0
Bra016746	-2.00032	5.29778	1818.39	0	0
Bra027306	1.99692	7.64505	6351.57	0	0
Bra039059	-1.99585	5.08771	1584.52	0	0
Bra028910	-1.99023	6.77813	4306.03	0	0
Bra031763	-1.98998	6.97371	4756.78	0	0
Bra025961	-1.98571	5.8192	2528.77	0	0
Bra000365	1.98055	7.1767	5073.93	0	0
Bra004136	1.98008	5.44477	1878.11	0	0
Bra011500	-1.9799	6.64468	3978.38	0	0
Bra028126	-1.97638	5.22043	1695.54	0	0
Bra014401	1.97169	7.57493	6035.1	0	0
Bra034295	-1.97054	7.02593	4801.8	0	0
Bra003526	1.96304	11.0957	16141.3	0	0
Bra023294	-1.96204	7.54715	6044.99	0	0
Bra023940	-1.94932	5.15518	1591.25	0	0
Bra040213	1.94685	8.32806	7927.55	0	0
Bra037254	1.93866	5.65323	2090.25	0	0
Bra030303	-1.93447	8.31372	7918.34	0	0
Bra024075	-1.93435	6.90018	4369.12	0	0
Bra020705	-1.92777	5.16689	1572.38	0	0
Bra006273	1.92686	5.64875	2065.62	0	0
Bra017236	-1.92201	5.66711	2165.72	0	0
Bra018969	1.92149	7.89472	6585.53	0	0
Bra031898	-1.91953	8.18486	7459.43	0	0
Bra015306	1.91582	6.00174	2584.44	0	0
Bra024562	1.91268	5.27568	1593.37	0	0
Bra040103	-1.91264	5.32866	1719.11	0	0
Bra006015	-1.90863	5.74568	2256.36	0	0
Bra025081	1.90743	5.32082	1631.65	0	0
Bra024642	-1.90091	5.51551	1915.41	0	0
Bra037520	-1.90051	6.36393	3206.21	0	0
Bra021063	-1.89835	6.72893	3870.04	0	0
Bra036528	-1.89632	6.48417	3394.6	0	0
Bra012788	1.89591	8.01945	6752.15	0	0
Bra025654	-1.88899	5.9066	2462.75	0	0
Bra008406	-1.88718	6.82893	4036.04	0	0
Bra029587	1.88247	6.56494	3390.5	0	0
Bra007679	-1.88245	6.48923	3358.01	0	0
Bra002214	-1.88217	6.34551	3125.11	0	0
Bra020828	-1.88216	5.28709	1629.75	0	0
Bra017741	-1.87956	6.31537	3066.43	0	0
Bra021758	-1.87837	6.18486	2862.71	0	0
Bra032343	-1.8777	6.45576	3289.1	0	0
Bra007109	-1.87652	11.1784	15115.8	0	0
Bra005670	-1.86566	5.97043	2512.03	0	0
Bra035599	-1.86413	7.40887	5206.51	0	0
Bra028446	-1.85599	5.88428	2355.26	0	0
Bra011821	1.85535	6.86584	3887.05	0	0
Bra012571	-1.85019	6.6864	3620.9	0	0
Bra016053	1.84873	5.68085	1969.5	0	0
Bra019382	-1.84867	6.78195	3805.01	0	0
Bra031055	-1.84661	5.89454	2348.51	0	0
Bra002528	-1.84611	5.60689	1940.23	0	0
Bra036467	-1.84113	5.50322	1799.18	0	0
Bra037157	-1.82835	5.80853	2185.83	0	0
Bra038811	-1.82827	5.84691	2241.54	0	0
Bra036577	1.82786	7.17654	4422.58	0	0
Bra035593	-1.82748	7.8428	6016.47	0	0
Bra025883	1.82628	5.71679	1976.73	0	0
Bra020472	-1.8243	7.21192	4589.48	0	0
Bra024280	-1.82165	5.82015	2188.76	0	0
Bra024095	-1.8177	8.24786	6924.9	0	0
Bra009953	-1.81626	5.37042	1616.32	0	0
Bra011299	-1.81467	5.33622	1579.68	0	0
Bra010482	1.81302	5.57067	1766.23	0	0
Bra036599	-1.81107	5.74887	2066.89	0	0
Bra019052	-1.80935	5.55262	1807.34	0	0
Bra013674	1.80927	7.67205	5415.63	0	0
Bra029732	-1.80399	10.6548	12787.4	0	0
Bra017350	-1.79266	5.3333	1543.4	0	0
Bra036540	1.78712	5.84839	2079.58	0	0
Bra035447	-1.78243	7.3279	4641.56	0	0
Bra028165	-1.78082	6.37176	2877.21	0	0
Bra034060	-1.78056	6.02503	2395.95	0	0
Bra005019	-1.7804	9.13303	8818.95	0	0
Bra013537	1.77941	5.4318	1558.04	0	0
Bra016187	-1.77515	5.76666	2020.62	0	0
Bra024812	-1.77464	7.32017	4589.58	0	0
Bra033528	-1.77253	5.38994	1568.75	0	0
Bra007284	-1.76879	8.99405	8379.27	0	0
Bra025323	-1.76779	5.60493	1800.15	0	0
Bra026745	-1.76451	9.76968	10204.9	0	0
Bra020203	-1.7643	5.52262	1694.23	0	0
Bra012359	1.76355	6.74797	3350.89	0	0
Bra010424	-1.76272	6.4229	2901.03	0	0
Bra012324	1.7624	6.72184	3300.51	0	0
Bra020538	1.7597	5.49782	1597.4	0	0
Bra001626	-1.75908	6.44356	2922.05	0	0
Bra018113	-1.7586	5.37163	1529.4	0	0
Bra027509	-1.75692	5.95178	2238.59	0	0
Bra017743	-1.75108	5.64688	1820.73	0	0
Bra034103	-1.75049	7.37791	4596.36	0	0
Bra012938	-1.74864	6.98755	3824.16	0	0
Bra018941	1.73585	9.0808	8219.97	0	0
Bra008513	-1.73372	6.42724	2824.76	0	0
Bra019354	-1.73204	6.76243	3359.17	0	0
Bra011701	-1.72785	5.86396	2054.62	0	0
Bra040651	-1.72758	7.63596	5010.12	0	0
Bra033169	-1.72654	5.52567	1636.25	0	0
Bra008699	1.7243	6.49165	2808.15	0	0
Bra025060	-1.72409	5.76357	1914.93	0	0
Bra032085	-1.72229	5.53543	1640.55	0	0
Bra027228	1.72022	6.28691	2513.74	0	0
Bra027877	-1.71952	7.76133	5225.18	0	0
Bra018144	-1.71872	12.009	14644.9	0	0
Bra020715	-1.71717	6.2905	2590.76	0	0
Bra023102	-1.71662	6.19596	2462.53	0	0
Bra035103	-1.7145	5.91699	2096.34	0	0
Bra011522	-1.71432	5.93867	2127.24	0	0
Bra004467	1.71418	6.91173	3469.15	0	0
Bra000391	1.71374	5.84347	1928.88	0	0
Bra007912	-1.70666	7.54548	4723.23	0	0
Bra027377	-1.70613	7.0446	3762.45	0	0
Bra035023	-1.70546	5.41791	1492.41	0	0
Bra038674	-1.70389	6.01334	2203.74	0	0
Bra032522	-1.70321	5.98889	2171.02	0	0
Bra027358	-1.69901	5.71573	1809.61	0	0
Bra028784	-1.69841	6.77759	3267.6	0	0
Bra038548	-1.69553	7.24958	4097.92	0	0
Bra031749	1.69422	7.92709	5339.61	0	0
Bra014908	-1.69405	9.53022	8937.23	0	0
Bra024332	-1.69335	6.15177	2349.57	0	0
Bra017210	-1.69237	6.08871	2267.92	0	0
Bra014542	-1.69112	5.47762	1525.41	0	0
Bra034623	-1.69111	5.51659	1568.33	0	0
Bra018168	-1.6889	5.54289	1594.17	0	0
Bra015335	1.68836	5.87317	1918.35	0	0
Bra011020	-1.68795	5.97778	2121.08	0	0
Bra006850	1.68679	8.09156	5637.3	0	0
Bra029584	1.68371	5.9099	1955.51	0	0
Bra007513	-1.68001	6.11406	2270.19	0	0
Bra026314	-1.67945	7.80678	5096.83	0	0
Bra016650	-1.67526	8.15389	5778.69	0	0
Bra013224	-1.66704	8.20965	5844.99	0	0
Bra020368	-1.66585	5.67174	1696.43	0	0
Bra016330	1.66444	8.08041	5480.56	0	0
Bra011877	1.65204	6.25163	2299.87	0	0
Bra000643	-1.65036	5.70912	1711.93	0	0
Bra011808	1.64884	6.01183	2013.63	0	0
Bra003938	1.64731	5.8683	1833.4	0	0
Bra012764	-1.64523	6.09795	2170.24	0	0
Bra018085	-1.641	7.32121	3993.04	0	0
Bra007279	-1.63752	6.04574	2092.1	0	0
Bra036882	-1.63617	5.76483	1749.37	0	0
Bra029230	-1.63411	5.77278	1754.46	0	0
Bra003287	-1.63116	6.81336	3098.35	0	0
Bra025406	-1.63056	7.0298	3450.13	0	0
Bra016934	-1.62868	9.47	8181.36	0	0
Bra036490	1.6259	6.69144	2818.55	0	0
Bra013091	1.62469	8.23891	5557.24	0	0
Bra039271	-1.62223	6.26956	2315.72	0	0
Bra006879	1.62218	6.39455	2401.88	0	0
Bra035929	1.62192	5.93867	1866.79	0	0
Bra040573	1.61701	6.34105	2323.49	0	0
Bra012127	-1.61593	9.30086	7718.48	0	0
Bra013732	-1.61417	5.83443	1786.29	0	0
Bra000214	-1.61369	7.37571	3966.54	0	0
Bra010263	1.61249	6.1367	2073.47	0	0
Bra000064	-1.61166	6.96709	3276.15	0	0
Bra028006	-1.60668	7.90084	4878.28	0	0
Bra037798	-1.60489	6.17538	2163.21	0	0
Bra009420	-1.6033	6.66344	2777.34	0	0
Bra007070	1.59996	7.06613	3318.46	0	0
Bra015639	1.59822	5.97867	1868.07	0	0
Bra006239	-1.59783	7.32705	3816.23	0	0
Bra002191	1.59694	6.05039	1943.24	0	0
Bra023965	-1.59665	6.03645	1990	0	0
Bra016889	-1.59655	8.27092	5517.28	0	0
Bra033199	-1.59573	6.46955	2489.08	0	0
Bra033104	-1.5921	5.68052	1575.97	0	0
Bra029001	-1.58745	8.17557	5278.25	0	0
Bra006416	-1.58624	5.74151	1631.24	0	0
Bra004192	-1.58448	6.04847	1975.53	0	0
Bra014308	1.581	6.63329	2598.31	0	0
Bra038614	1.58031	5.71803	1541.48	0	0
Bra003950	-1.5718	6.15979	2066.57	0	0
Bra021673	1.57085	8.00059	4789.92	0	0
Bra013382	-1.56849	7.02925	3215.02	0	0
Bra026795	-1.56573	5.65648	1506.18	0	0
Bra021241	1.55835	6.5264	2389.74	0	0
Bra021179	-1.5545	5.74372	1575.82	0	0
Bra007380	-1.55099	5.79923	1626.98	0	0
Bra028660	1.54877	6.84975	2809.2	0	0
Bra006208	-1.54556	10.4904	9273.91	0	0
Bra001507	-1.53699	5.87388	1681.21	0	0
Bra015811	1.53597	7.66879	4024.87	0	0
Bra020523	-1.53282	7.10707	3198.19	0	0
Bra019193	-1.53015	7.25659	3417.27	0	0
Bra004543	1.52861	6.25484	2008.58	0	0
Bra024934	-1.52579	5.91169	1699.51	0	0
Bra009002	1.52578	5.78485	1516.47	0	0
Bra026349	-1.52462	8.96362	6311.15	0	0
Bra036184	-1.5231	6.68507	2561.09	0	0
Bra001289	-1.52173	5.93096	1711.99	0	0
Bra009872	-1.52168	6.36536	2169.65	0	0
Bra018190	-1.51877	6.48237	2291.16	0	0
Bra006556	-1.51706	6.16559	1943.17	0	0
Bra005356	-1.5155	6.60462	2431.15	0	0
Bra020425	-1.51134	6.67773	2516.66	0	0
Bra039669	1.51056	6.04109	1754.91	0	0
Bra031624	-1.50601	10.3048	8514	0	0
Bra039280	-1.50396	5.9834	1734.48	0	0
Bra020549	-1.49992	6.01572	1758.92	0	0
Bra016589	1.49738	6.67147	2407.84	0	0
Bra036512	-1.49701	6.02216	1758.32	0	0
Bra032945	1.49542	9.04288	6175.09	0	0
Bra024699	-1.49469	6.39969	2135.22	0	0
Bra018370	-1.49228	6.55236	2297.95	0	0
Bra003256	-1.49169	9.45765	6920.2	0	0
Bra016328	-1.49055	7.35116	3397.44	0	0
Bra028906	-1.49039	9.46926	6927.56	0	0
Bra040582	-1.49014	7.13171	3073.09	0	0
Bra033495	-1.48593	7.89224	4211.18	0	0
Bra027504	-1.48561	6.23615	1941.32	0	0
Bra031649	-1.48463	7.64569	3819.57	0	0
Bra005405	-1.48319	6.86519	2677.24	0	0
Bra024261	-1.47816	8.76283	5613.03	0	0
Bra039061	-1.47763	6.24404	1932.41	0	0
Bra018543	1.47649	7.24275	3119.73	0	0
Bra038384	-1.47228	7.41134	3407.49	0	0
Bra039661	-1.47162	7.54025	3597.5	0	0
Bra034546	-1.46753	5.96307	1636.9	0	0
Bra008055	1.46183	7.96421	4139.57	0	0
Bra013904	-1.46176	6.6102	2282.62	0	0
Bra032384	-1.45029	9.32236	6338.76	0	0
Bra025082	1.44822	7.19039	2941.84	0	0
Bra035992	-1.44787	6.13489	1758.38	0	0
Bra025819	-1.4443	8.08759	4294.42	0	0
Bra003659	-1.44338	6.10441	1719	0	0
Bra010075	1.44265	6.43386	1987.37	0	0
Bra032711	-1.44192	6.72387	2366.43	0	0
Bra013173	-1.44175	6.66161	2289.98	0	0
Bra037913	-1.44159	12.0183	10499	0	0
Bra001046	-1.44089	8.82283	5447.93	0	0
Bra020113	1.43084	7.95477	3966.46	0	0
Bra037761	-1.42877	10.2167	7567.64	0	0
Bra000321	-1.42704	6.155	1729.35	0	0
Bra021548	-1.42396	6.27992	1839.67	0	0
Bra008033	-1.42111	6.59163	2147.55	0	0
Bra027294	-1.41312	7.38601	3126.16	0	0
Bra012850	-1.41092	6.90145	2487.83	0	0
Bra036845	-1.40507	6.25869	1776.52	0	0
Bra017960	-1.40498	6.25273	1770.38	0	0
Bra030385	1.40416	6.2695	1738.56	0	0
Bra008242	-1.40347	8.45649	4620.77	0	0
Bra009609	-1.40124	8.67813	4946.36	0	0
Bra026409	-1.39769	7.72391	3522.35	0	0
Bra010572	-1.395	5.98408	1511.59	0	0
Bra022585	1.39409	7.90695	3709.09	0	0
Bra011057	-1.39083	9.21423	5693.11	0	0
Bra001500	1.38427	7.0749	2563.69	0	0
Bra039452	-1.38207	6.96825	2475.7	0	0
Bra000544	-1.38099	6.17871	1650.16	0	0
Bra016840	1.3808	7.47736	3064.2	0	0
Bra008683	1.37429	7.80438	3473.3	0	0
Bra015779	-1.36767	9.0731	5304.26	0	0
Bra037555	1.36393	6.39285	1757.58	0	0
Bra017435	-1.36359	8.49638	4437.97	0	0
Bra007333	-1.3635	8.71218	4747.54	0	0
Bra019049	-1.36231	8.78756	4848.18	0	0
Bra036344	-1.35905	7.48704	3034.34	0	0
Bra025838	1.359	6.25469	1625.33	0	0
Bra038011	-1.35778	8.42676	4299.83	0	0
Bra008191	1.35469	7.28581	2718.67	0	0
Bra035942	1.35296	6.83756	2184.76	0	0
Bra001934	-1.34969	7.26391	2718.85	0	0
Bra034863	-1.34086	7.4327	2892.14	0	0
Bra013582	-1.33515	6.70688	2034.86	0	0
Bra009967	1.33154	6.45598	1736.37	0	0
Bra023844	1.33139	6.57535	1846.56	0	0
Bra020724	-1.32355	8.1003	3663.5	0	0
Bra001291	-1.32018	6.99299	2299.59	0	0
Bra027325	-1.30964	7.09208	2376.5	0	0
Bra034783	-1.30825	6.23786	1539.81	0	0
Bra027940	1.30564	8.05824	3476.52	0	0
Bra035179	-1.30359	6.50302	1748.33	0	0
Bra021909	-1.30301	11.7323	8278.85	0	0
Bra031427	-1.29654	11.1813	7505.01	0	0
Bra020599	-1.29222	6.29045	1546.75	0	0
Bra037490	-1.29095	7.29377	2534.67	0	0
Bra004158	-1.29066	8.64487	4190.3	0	0
Bra009476	-1.28988	6.41778	1643.28	0	0
Bra019518	-1.28985	6.36539	1600.84	0	0
Bra038081	-1.28802	6.4142	1636.15	0	0
Bra034739	-1.28471	6.26942	1513.9	0	0
Bra031534	-1.278	10.2594	6167.08	0	0
Bra013352	-1.2759	6.55073	1720.16	0	0
Bra013931	-1.27557	8.38272	3767.67	0	0
Bra019867	-1.27362	6.82389	1977.59	0	0
Bra023967	-1.2726	8.24996	3584.88	0	0
Bra000227	-1.2708	9.40119	5030.63	0	0
Bra011194	-1.26708	6.56987	1716.46	0	0
Bra002703	-1.26603	7.20618	2349.81	0	0
Bra039844	-1.26573	8.77193	4197.36	0	0
Bra006235	-1.2605	7.97358	3191.31	0	0
Bra019474	-1.25892	7.71483	2884.47	0	0
Bra002374	-1.25489	6.84821	1947.26	0	0
Bra011002	-1.25293	6.41381	1553.66	0	0
Bra004075	-1.25218	9.10152	4396.4	0	0
Bra011514	-1.23834	7.65647	2732.2	0	0
Bra022245	-1.23775	7.80728	2895.91	0	0
Bra040482	-1.23216	9.38651	4724.99	0	0
Bra018995	-1.2308	6.58123	1634.61	0	0
Bra013859	-1.22797	7.8788	2929.9	0	0
Bra006036	-1.2168	7.40914	2384.63	0	0
Bra029519	-1.21642	6.73143	1730.87	0	0
Bra018039	1.21328	6.89583	1839.1	0	0
Bra016564	-1.20332	6.85963	1810.61	0	0
Bra034383	-1.2023	7.11704	2045.14	0	0
Bra034911	-1.2007	10.5202	5753.35	0	0
Bra028219	-1.19617	6.54941	1522.99	0	0
Bra000474	-1.19565	8.7996	3795.88	0	0
Bra016284	-1.19469	7.72763	2625.13	0	0
Bra011179	1.1794	6.94171	1784.08	0	0
Bra000938	-1.16762	6.63399	1522.85	0	0
Bra021171	-1.16171	7.4977	2268.73	0	0
Bra015924	-1.16152	7.21596	2006.2	0	0
Bra000734	1.16012	8.5896	3332.55	0	0
Bra019742	-1.15874	6.89674	1717.25	0	0
Bra000144	-1.15843	11.9853	6848.48	0	0
Bra026192	-1.15828	7.17402	1957.05	0	0
Bra027204	1.1521	8.22259	2911.39	0	0
Bra010189	-1.15137	6.98997	1775.59	0	0
Bra033753	-1.15005	7.24247	1992.83	0	0
Bra019689	1.14887	7.03614	1779.39	0	0
Bra021163	-1.14375	6.86183	1647.51	0	0
Bra018940	1.14332	10.0629	4761.77	0	0
Bra039597	1.1418	9.88964	4575.35	0	0
Bra024580	-1.13279	8.67299	3294.24	0	0
Bra034822	1.1259	7.22205	1868.66	0	0
Bra013314	-1.1248	8.39022	2969.12	0	0
Bra018096	-1.12008	7.17745	1839.53	0	0
Bra017940	1.11896	7.94037	2484.97	0	0
Bra031471	-1.11487	8.85014	3369.28	0	0
Bra029481	-1.11062	7.19692	1825.82	0	0
Bra020388	-1.10867	7.27475	1884.78	0	0
Bra033412	-1.10581	8.03677	2542.1	0	0
Bra025812	-1.10535	9.43377	3879.19	0	0
Bra000460	-1.10524	8.1056	2605.67	0	0
Bra018423	1.09454	7.00091	1595.69	0	0
Bra013786	-1.09389	7.22036	1792.56	0	0
Bra000737	-1.09338	6.89247	1534.53	0	0
Bra003840	-1.093	6.95092	1578.89	0	0
Bra010693	1.09144	7.67705	2138.05	0	0
Bra033545	1.09058	8.35364	2741.17	0	0
Bra040699	-1.08825	7.29996	1838.38	0	0
Bra010350	-1.08224	9.83306	4089.37	0	0
Bra011345	1.07952	8.73631	3040.47	0	0
Bra003198	-1.07662	10.3067	4467.91	0	0
Bra031813	-1.07599	10.9032	4985.35	0	0
Bra015501	1.07248	7.56299	1975.46	0	0
Bra018629	-1.07056	8.89279	3154.91	0	0
Bra040764	1.06511	9.50988	3660.92	0	0
Bra010774	-1.06089	9.39255	3545.57	0	0
Bra010018	-1.06017	7.19008	1666.16	0	0
Bra012230	-1.05988	7.61649	1998.01	0	0
Bra021759	-1.05976	7.76653	2119.39	0	0
Bra003226	-1.05954	7.15835	1640.95	0	0
Bra028409	-1.05877	7.03898	1548.4	0	0
Bra003564	-1.05566	7.97259	2273.3	0	0
Bra024345	-1.05489	7.0473	1543.74	0	0
Bra036240	-1.05403	11.1763	5017.64	0	0
Bra033802	-1.05314	8.99747	3147.7	0	0
Bra009805	-1.04729	7.13496	1585.26	0	0
Bra004950	-1.04466	8.73773	2874.44	0	0
Bra038377	-1.0445	8.39923	2582.89	0	0
Bra000663	-1.03752	8.7897	2879.78	0	0
Bra028411	-1.03407	7.53771	1845.75	0	0
Bra007604	-1.03315	7.18092	1578.84	0	0
Bra018309	-1.03108	7.17787	1569.76	0	0
Bra037164	-1.02971	11.3012	4893.77	0	0
Bra000884	-1.01926	7.53596	1794.15	0	0
Bra010820	-1.01788	8.13393	2245.45	0	0
Bra014433	-1.01748	10.9295	4490.55	0	0
Bra023176	-1.0166	10.8605	4429.68	0	0
Bra003527	-1.01328	10.3011	3966.03	0	0
Bra038418	-1.01173	8.54542	2545.95	0	0
Bra016224	-1.00905	8.20516	2262.76	0	0
Bra027109	-1.00581	10.6032	4141.45	0	0
Bra037389	-1.00121	8.2105	2233.72	0	0
Bra015520	-0.997265	10.3681	3895.3	0	0
Bra017165	-0.994946	8.35771	2318.8	0	0
Bra039925	0.993414	7.85924	1918.99	0	0
Bra015790	-0.988515	9.47825	3156.71	0	0
Bra023598	0.984557	7.72921	1793.83	0	0
Bra011319	-0.982629	7.69059	1778.17	0	0
Bra012083	-0.974372	10.8416	4063.19	0	0
Bra023336	-0.967771	7.63862	1692.03	0	0
Bra030367	-0.964614	7.36827	1502.63	0	0
Bra024848	-0.964325	7.60285	1656.28	0	0
Bra025989	-0.956288	7.89878	1827.28	0	0
Bra001676	0.955139	8.50905	2234.26	0	0
Bra026009	-0.952649	7.749	1713.81	0	0
Bra003451	-0.944142	10.0263	3266.83	0	0
Bra004252	-0.944137	8.31605	2064.66	0	0
Bra008152	-0.943667	9.25126	2722.95	0	0
Bra038863	-0.942172	10.1977	3370.24	0	0
Bra027485	-0.941701	8.66163	2295.32	0	0
Bra024964	-0.934231	7.76733	1661.74	0	0
Bra016989	-0.929739	8.07825	1847.5	0	0
Bra014131	-0.927325	7.71905	1608.16	0	0
Bra033029	-0.927233	8.88254	2377.88	0	0
Bra015656	-0.926369	10.044	3159.36	0	0
Bra036518	-0.923881	8.63182	2191.12	0	0
Bra021506	-0.923063	8.38611	2023.49	0	0
Bra008993	-0.916105	7.8176	1630.93	0	0
Bra012376	-0.913832	8.08304	1790.2	0	0
Bra001809	-0.909598	9.31948	2579.67	0	0
Bra001950	-0.9087	8.27722	1892.57	0	0
Bra016855	-0.900263	7.81101	1572.75	0	0
Bra010717	-0.894181	10.4626	3203.72	0	0
Bra027506	-0.89144	8.18683	1768.66	0	0
Bra018955	-0.884529	9.05564	2277.3	0	0
Bra021649	-0.879999	9.86521	2750.22	0	0
Bra019797	-0.878156	11.2063	3526.55	0	0
Bra018700	0.874429	8.57447	1922.24	0	0
Bra031167	-0.871072	8.01162	1588.63	0	0
Bra022019	-0.868227	9.09587	2220.62	0	0
Bra030660	-0.867775	10.6809	3145.63	0	0
Bra001249	-0.863197	7.90072	1499.15	0	0
Bra033982	-0.853495	8.40091	1745.67	0	0
Bra037104	-0.849341	9.53217	2377.11	0	0
Bra032672	-0.844436	10.5579	2914.88	0	0
Bra029765	0.844049	8.95507	2011.48	0	0
Bra003624	-0.831031	10.0404	2550.93	0	0
Bra011605	-0.825496	8.76853	1833.24	0	0
Bra010727	-0.820745	9.75268	2339.73	0	0
Bra028924	-0.819498	8.92015	1888.65	0	0
Bra027188	-0.810999	9.53906	2173.63	0	0
Bra037609	-0.807016	8.72048	1728.28	0	0
Bra011985	-0.804167	9.44249	2089.16	0	0
Bra010384	-0.781979	9.33127	1923.6	0	0
Bra029563	-0.775136	11.2048	2757.3	0	0
Bra013148	-0.767594	10.4565	2369.94	0	0
Bra013013	-0.757631	8.79721	1562.49	0	0
Bra018006	-0.757336	8.91456	1615.05	0	0
Bra011919	-0.74188	8.90108	1544.83	0	0
Bra005522	0.740138	9.06005	1600.99	0	0
Bra035087	-0.738104	9.6113	1837.69	0	0
Bra011884	-0.73647	9.01624	1572.9	0	0
Bra000687	-0.728508	9.54979	1765.25	0	0
Bra028174	-0.720201	13.4919	3300.9	0	0
Bra030843	-0.699986	9.51715	1618.89	0	0
Bra037196	-0.686475	10.6647	1975.6	0	0
Bra018305	-0.659082	9.82527	1542.67	0	0
Bra008392	-0.657374	10.2435	1674.22	0	0
Bra017055	-0.653813	13.0055	2562.56	0	0
Bra011329	-0.646949	10.0139	1547.86	0	0
Bra034927	-0.608156	10.9025	1621.09	0	0
Bra011405	0.603605	11.4496	1747.39	0	0
Bra035392	-0.591648	10.7351	1490.31	0	0
Bra028181	-0.569821	14.0104	2221.08	0	0
Bra021189	2.49073	4.50631	1487.11	4.94065645841247e-324	2.02566914794911e-322
Bra013481	1.93857	5.13651	1488.72	4.94065645841247e-324	2.02566914794911e-322
Bra007430	-1.36792	6.01533	1486.49	9.88131291682493e-324	4.0019317313141e-322
Bra015397	-0.745897	8.7288	1484.4	2.47032822920623e-323	1.00295326105773e-321
Bra008940	-0.936843	7.47099	1483.83	3.45845952088873e-323	1.40314643418914e-321
ENSRNA049461494	7.76452	3.15853	1483.1	4.94065645841247e-323	2.00590652211546e-321
Bra018970	2.49563	4.49359	1480.79	1.48219693752374e-322	6.01277890988797e-321
Bra027922	-2.8962	4.09474	1480.72	1.53160350210786e-322	6.20546451176606e-321
Bra023866	2.29702	4.69668	1480.39	1.82804288961261e-322	7.40110337470187e-321
Bra020393	1.20308	6.50959	1479.26	3.16202013338398e-322	1.27913595708299e-320
Bra025192	2.14202	4.8762	1478.58	4.44659081257122e-322	1.79691675392461e-320
Bra025037	-0.658418	9.64377	1477.77	6.6204796542727e-322	2.6724010783553e-320
Bra014208	0.825799	8.12015	1476.97	9.88131291682493e-322	3.98513349935549e-320
Bra006210	-3.293	3.8575	1474.4	3.5276287113065e-321	1.42137745652068e-319
Bra002616	-1.3022	6.17012	1473.46	5.63234836259021e-321	2.2672178422009e-319
Bra036316	2.02914	5.00472	1472.02	1.1487026265809e-320	4.61956319518024e-319
Bra029837	-1.08603	6.83316	1471.25	1.68822231183954e-320	6.78278021893155e-319
Bra000867	1.10677	6.79584	1470.46	2.49848997101918e-320	1.00286432924148e-318
Bra003714	-3.70731	3.64353	1459.3	6.31520637302031e-318	2.53244576888061e-316
Bra008261	-1.44043	5.83789	1459.24	6.50695819082776e-318	2.60686168942439e-316
Bra026758	-1.4329	5.84942	1457.43	1.59984977789921e-317	6.40334560916268e-316
Bra013046	0.926532	7.50429	1456.77	2.216216433712e-317	8.86192475968455e-316
Bra003944	-2.54872	4.32302	1456.05	3.16297022162093e-317	1.26357066100293e-315
Bra033563	-2.10585	4.80574	1453.24	1.27869841254703e-316	5.10342206730112e-315
Bra019747	7.12003	3.15952	1452.78	1.60341826583942e-316	6.39336511750811e-315
Bra013445	1.81908	5.26235	1452.44	1.89806404683008e-316	7.56106986455533e-315
Bra024616	-0.753621	8.59062	1452.43	1.90932479103009e-316	7.59875241934596e-315
Bra010834	-1.53334	5.6577	1451.43	3.13013931242196e-316	1.24456227183169e-314
Bra021551	-1.61945	5.51385	1449.66	7.54085305405477e-316	2.99546541351722e-314
Bra024089	1.33462	6.10316	1450.1	1.52422442417965e-315	6.04900579116121e-314
Bra025457	-2.27371	4.59116	1448.18	1.56983353598131e-315	6.22415390498272e-314
Bra031833	-1.48947	5.73158	1447.4	2.31836859191256e-315	9.18335187048466e-314
Bra003221	-0.885281	7.67855	1446.11	4.39606920605296e-315	1.7397052113119e-313
Bra038949	3.28094	3.94417	1444.25	1.10687622217251e-314	4.37625869809428e-313
Bra000236	1.31687	6.13595	1441.53	4.26595764173152e-314	1.68505326848395e-312
Bra010818	-1.21216	6.38738	1440.83	6.01744880849115e-314	2.37466880668685e-312
Bra035741	1.1649	6.57463	1440.68	6.50062733097288e-314	2.56294826714394e-312
Bra027821	-1.21806	6.36889	1440.66	6.56736273524475e-314	2.58684187067343e-312
Bra010908	1.80806	5.26431	1440.22	8.16012097104625e-314	3.21122073959403e-312
Bra005720	-0.730231	8.76528	1439.75	1.03033219157579e-313	4.05084751480079e-312
Bra004546	-1.21929	6.36339	1439.36	1.24831342601893e-313	4.90329145158363e-312
Bra014886	-2.94382	4.0231	1438.57	1.84608937452231e-313	7.24456989335819e-312
Bra035422	-1.22805	6.33046	1435.38	8.98542590609741e-313	3.52285480738492e-311
Bra010274	-2.58299	4.27534	1435.13	1.01877187257358e-312	3.9905209114568e-311
Bra006077	-1.69483	5.37169	1433.43	2.36924523798609e-312	9.27170497306869e-311
Bra003490	-1.27754	6.18443	1432.53	3.69554003132229e-312	1.44485682818684e-310
Bra005216	-1.31745	6.0752	1430.88	8.3788064752229e-312	3.27285490707179e-310
Bra011585	-0.775566	8.3655	1430.34	1.09916467585573e-311	4.28948760551803e-310
Bra005229	2.66049	4.30294	1430.12	1.22613140664445e-311	4.78055263592449e-310
Bra013205	-1.54244	5.61813	1427.82	3.83479006808352e-311	0
Bra029258	-2.32509	4.50864	1426.86	6.16896578994361e-311	0
Bra021417	-0.955465	7.28887	1425.32	1.32557141718901e-310	0
Bra024886	-1.03819	6.94274	1424.42	2.07102369667784e-310	0
Bra040448	-0.704945	8.96728	1423.44	3.35846924715214e-310	0
Bra035446	-1.46534	5.75154	1423.72	7.88296205704554e-310	3.05653e-308
Bra005709	-2.03057	4.86916	1421.17	0	4.03133e-308
Bra030238	1.64287	5.49833	1419.47	0	9.34131e-308
Bra037630	-4.61152	3.30731	1419.42	0	9.54396e-308
Bra017341	-0.773378	8.35443	1416.71	0	3.66293e-307
Bra031061	-3.55049	3.66838	1416.62	0	3.83945e-307
Bra018987	3.28243	3.91427	1415.22	0	7.66325e-307
Bra033718	-1.11899	6.64725	1415.02	0	8.45653e-307
Bra009229	-2.30397	4.51555	1412.88	6.34469e-308	2.44213e-306
Bra019246	4.39054	3.49054	1411.88	1.04516e-307	4.01926e-306
Bra028768	0.738852	8.63617	1409.51	3.38102e-307	1.29901e-305
Bra003053	-0.905149	7.50642	1409.26	3.82618e-307	1.46871e-305
Bra034675	-0.830897	7.93144	1407.43	9.48233e-307	3.63656e-305
Bra011616	-0.94079	7.32422	1405.84	2.08933e-306	8.0055e-305
Bra000480	1.15114	6.56363	1400.89	2.4376e-305	9.33146e-304
Bra021067	0.882495	7.63943	1401.83	4.68765e-305	1.79287e-303
Bra004855	2.39381	4.50045	1398.93	6.44903e-305	2.4643e-303
Bra010307	-1.94755	4.95736	1398.53	7.8452e-305	2.99509e-303
Bra038032	-2.26417	4.54253	1396.73	1.91917e-304	7.32024e-303
Bra024659	-1.06259	6.81146	1394.72	5.20743e-304	1.98447e-302
Bra008808	-1.18416	6.40883	1394.19	2.31656e-303	8.82006e-302
Bra019875	1.846	5.15522	1390.47	4.28951e-303	1.63171e-301
Bra018860	-1.04451	6.87079	1390.41	4.41011e-303	1.67608e-301
Bra032511	-1.2541	6.18961	1387.96	1.48812e-302	5.65058e-301
Bra001359	1.69501	5.37866	1387.43	1.94192e-302	7.36708e-301
Bra027284	1.71773	5.34129	1385.61	4.79059e-302	1.81577e-300
Bra028948	-0.758534	8.40059	1384.61	7.85078e-302	2.97301e-300
Bra040893	-1.0246	6.93126	1381.98	2.9028e-301	1.09827e-299
Bra026425	2.41469	4.45734	1381.14	4.39204e-301	1.66024e-299
Bra007234	-3.61838	3.60304	1384.26	8.83752e-301	3.33769e-299
Bra010231	-1.54305	5.56621	1379.3	1.0945e-300	4.12991e-299
Bra024068	-1.10228	6.65333	1378.56	1.58437e-300	5.97301e-299
Bra005134	-0.897762	7.4949	1380.59	1.66981e-300	6.2895e-299
Bra011771	2.74702	4.18938	1377.7	2.4276e-300	9.13565e-299
Bra021734	-5.63044	3.06957	1376.86	3.67017e-300	1.37995e-298
Bra033998	-2.01334	4.83536	1374	1.51903e-299	5.7063e-298
Bra038958	-2.06731	4.76062	1373.71	1.75516e-299	6.58749e-298
Bra026864	3.67087	3.69063	1372.5	3.20548e-299	1.20201e-297
Bra014247	-2.12959	4.6762	1371.93	4.24052e-299	1.58873e-297
Bra039342	-0.578255	10.5296	1371.69	4.77873e-299	1.78878e-297
Bra039091	-0.877777	7.58579	1371.14	6.27963e-299	2.34851e-297
Bra034346	-1.1482	6.49186	1370.23	9.86197e-299	3.68501e-297
Bra040916	-0.893818	7.49521	1369.01	1.809e-298	6.75349e-297
Bra015038	1.179	6.43042	1368.62	2.19547e-298	8.18905e-297
Bra006401	-3.97114	3.44452	1368.61	2.20813e-298	8.229e-297
Bra017296	1.99386	4.93477	1367.46	3.9005e-298	1.45231e-296
Bra005168	-0.845227	7.76575	1366.66	5.81187e-298	2.16208e-296
Bra007699	1.63292	5.45476	1363.98	2.19501e-297	8.15846e-296
Bra003833	-2.21851	4.55595	1363.67	2.56219e-297	9.51485e-296
Bra032034	-1.93	4.94047	1363.19	3.25445e-297	1.2075e-295
Bra019231	-0.681244	9.05526	1362.94	3.68739e-297	1.36693e-295
Bra008856	-1.93639	4.92779	1360.37	1.3198e-296	4.88826e-295
Bra003906	0.807149	8.01367	1359.59	1.93864e-296	7.17401e-295
Bra010795	-1.75286	5.19201	1359.02	2.57802e-296	9.53168e-295
Bra015880	1.22919	6.26471	1358.98	2.63287e-296	9.72594e-295
Bra007507	4.37938	3.43638	1358.77	2.92523e-296	1.07965e-294
Bra015415	4.41559	3.42455	1357.59	5.2451e-296	1.93418e-294
Bra026580	-1.55778	5.51837	1357.04	6.9015e-296	2.54277e-294
Bra019035	-3.09433	3.84644	1356.19	1.04889e-295	3.86113e-294
Bra031456	-1.18536	6.35048	1355.96	1.17551e-295	4.32347e-294
Bra015826	-0.983422	7.05546	1354.54	2.38577e-295	8.76708e-294
Bra037201	-1.15328	6.45053	1353.81	3.42587e-295	1.25782e-293
Bra036140	-2.20853	4.55388	1352.99	5.14461e-295	1.88722e-293
Bra015665	0.918522	7.37055	1352.74	5.81259e-295	2.13041e-293
Bra006137	-2.77468	4.04472	1348.39	5.04455e-294	1.84731e-292
Bra000165	3.64258	3.67639	1348.35	5.14132e-294	1.88111e-292
Bra026937	2.07446	4.80239	1346.78	1.12136e-293	4.0993e-292
Bra009181	-0.776523	8.17703	1345.53	2.08888e-293	7.62956e-292
Bra029545	4.18836	3.47701	1346.11	3.89516e-293	1.42147e-291
Bra033958	1.13855	6.52497	1344.15	4.1361e-293	1.50809e-291
Bra037280	-1.39104	5.80881	1343.39	6.02516e-293	2.19497e-291
Bra001415	-0.713809	8.7	1350.07	6.2417e-293	2.27189e-291
Bra013450	-0.779756	8.1499	1343.12	6.91771e-293	2.51578e-291
Bra011383	-2.86834	3.97332	1342.48	9.48182e-293	3.44531e-291
Bra026595	-2.48028	4.26405	1341.5	1.54656e-292	5.61473e-291
Bra001587	-1.26543	6.09298	1340.49	2.54855e-292	9.24448e-291
Bra000778	-1.64591	5.34545	1340	3.24557e-292	1.17627e-290
Bra031693	1.17955	6.3866	1339.78	3.62798e-292	1.31373e-290
Bra003190	1.23209	6.22953	1339.07	5.16128e-292	1.86736e-290
Bra009203	1.41406	5.80154	1338.04	8.58537e-292	3.10354e-290
Bra012274	1.54251	5.57057	1337.3	1.24202e-291	4.48596e-290
Bra034725	2.13575	4.71194	1335.8	2.61595e-291	9.44023e-290
Bra006511	2.28317	4.54085	1335.6	2.89049e-291	1.04221e-289
Bra004165	-1.69491	5.25724	1335.55	2.96544e-291	1.06832e-289
Bra016238	-1.0999	6.59809	1333.61	7.75754e-291	2.79232e-289
Bra011537	-0.901638	7.39032	1331.55	2.15541e-290	7.75174e-289
Bra027688	1.09476	6.64327	1330.94	2.91336e-290	1.04687e-288
Bra012371	-1.21109	6.23419	1331.26	6.71683e-290	2.41154e-288
Bra026631	-1.17149	6.35288	1327.97	1.27779e-289	4.58374e-288
Bra027080	-1.09551	6.60424	1327.63	1.51082e-289	5.41507e-288
Bra012157	1.09839	6.62772	1327.05	2.01719e-289	7.22388e-288
Bra019210	-0.80873	7.91508	1326.35	2.84777e-289	1.01896e-287
Bra015815	-1.06552	6.70114	1325.71	3.90796e-289	1.39713e-287
Bra003850	2.81956	4.08682	1325.4	4.56978e-289	1.63235e-287
Bra009053	1.18279	6.35273	1324.9	5.84555e-289	2.0863e-287
Bra016382	2.69411	4.17116	1324.47	7.25353e-289	2.58662e-287
Bra030157	-2.05464	4.71193	1321.38	3.36297e-288	1.19823e-286
Bra004101	1.36498	5.87881	1320.67	4.78217e-288	1.70245e-286
Bra037364	-0.743395	8.37437	1319.82	7.291e-288	2.59341e-286
Bra016522	-1.06769	6.68161	1317.49	2.32168e-287	8.25125e-286
Bra024038	-2.58901	4.14907	1317.27	2.58892e-287	9.19327e-286
Bra021879	-0.68187	8.92378	1316.38	4.02679e-287	1.42871e-285
Bra009334	-0.956198	7.10784	1315.28	6.93849e-287	2.45973e-285
Bra036315	2.33247	4.46173	1315.25	7.04276e-287	2.49459e-285
Bra012471	-1.6802	5.2541	1313.21	1.94179e-286	6.87219e-285
Bra034611	-1.99484	4.77824	1309.63	1.14779e-285	4.05872e-284
Bra017125	1.33935	5.91862	1309.59	1.17224e-285	4.14172e-284
Bra005668	0.883973	7.46636	1309.38	1.2991e-285	4.58608e-284
Bra011154	-1.32476	5.90454	1307.11	4.02266e-285	1.41889e-283
Bra001923	1.22432	6.20544	1307.17	1.00891e-284	3.5557e-283
Bra001815	-3.23351	3.7027	1301.07	8.05315e-284	2.83581e-282
Bra036950	-0.606831	9.79302	1300.69	9.71632e-284	3.41862e-282
Bra019615	-1.20135	6.21915	1300.28	1.19041e-283	4.1849e-282
Bra036972	-1.11711	6.4894	1298.12	3.47819e-283	1.22174e-281
Bra025304	-0.766178	8.14896	1297.56	4.60197e-283	1.61513e-281
Bra015419	-2.30326	4.37434	1297.11	5.74912e-283	2.01606e-281
Bra027347	-1.48249	5.58141	1296.59	7.46269e-283	2.61479e-281
Bra011208	2.22644	4.55278	1295.91	1.04541e-282	3.6599e-281
Bra021157	-1.98323	4.77708	1295.86	1.07277e-282	3.75255e-281
Bra035469	-1.53237	5.49275	1295.82	1.09047e-282	3.81131e-281
Bra039995	-1.22784	6.13206	1294.78	1.82955e-282	6.3892e-281
Bra004532	-1.59782	5.37237	1293.6	3.28865e-282	1.14752e-280
Bra023161	-1.12793	6.44285	1292.82	4.83316e-282	1.68506e-280
Bra007271	2.98199	3.95	1292.3	6.25861e-282	2.18023e-280
Bra031371	-1.39885	5.73401	1292.09	6.95276e-282	2.42004e-280
Bra029414	1.54861	5.51121	1291.76	8.19898e-282	2.85146e-280
Bra004322	-1.11723	6.47595	1291.34	1.01168e-281	3.51554e-280
Bra030858	-0.628792	9.45501	1289.82	2.14979e-281	7.4643e-280
Bra010396	-2.38602	4.28554	1285.52	1.81831e-280	6.30817e-279
Bra008036	1.80712	5.08531	1283	6.35995e-280	2.20461e-278
Bra033832	-1.09229	6.54846	1282.15	9.67608e-280	3.35135e-278
Bra010483	-0.675079	8.89773	1281.25	1.51215e-279	5.2331e-278
Bra008947	-1.95036	4.80395	1280.54	2.15105e-279	7.43804e-278
Bra027203	-0.848489	7.57971	1280.31	2.41844e-279	8.3558e-278
Bra000285	-0.76308	8.12973	1279.39	3.81501e-279	1.31702e-277
Bra002375	-1.00599	6.84646	1278.52	5.8913e-279	2.03214e-277
Bra033428	-1.87084	4.92014	1277.32	1.06848e-278	3.68258e-277
Bra024117	-0.882114	7.38875	1274.92	3.51261e-278	1.20966e-276
Bra018372	0.61868	9.54939	1274.71	3.90299e-278	1.343e-276
Bra034704	-0.777561	8.0121	1272.9	9.60439e-278	3.30212e-276
Bra034237	-1.74853	5.09544	1272.36	1.25297e-277	4.30437e-276
Bra024324	-0.852495	7.5412	1272.03	1.47729e-277	5.07088e-276
Bra006004	-1.71096	5.15299	1271.14	2.29831e-277	7.88264e-276
Bra011590	3.03209	3.89529	1270.78	2.74853e-277	9.41913e-276
Bra030248	-0.909875	7.24342	1270.4	3.31045e-277	1.13356e-275
Bra009565	-0.870389	7.43907	1269.51	5.1699e-277	1.76884e-275
Bra020821	2.82808	4.02002	1268.93	6.88879e-277	2.35503e-275
Bra022115	-1.33397	5.83972	1268.46	8.69693e-277	2.97076e-275
Bra014024	-0.589734	9.93481	1267.29	1.55765e-276	5.31644e-275
Bra010419	1.38009	5.78567	1266.83	1.95001e-276	6.65022e-275
Bra003981	3.09277	3.85464	1264.71	5.59405e-276	1.90622e-274
Bra028520	-1.8705	4.90259	1264	7.96182e-276	2.71087e-274
Bra001175	-0.903006	7.26322	1263.16	1.20921e-275	4.11386e-274
Bra018184	-0.85818	7.49068	1262.38	1.78103e-275	6.05436e-274
Bra000953	-0.893233	7.30448	1259.67	6.8405e-275	2.32346e-273
Bra015530	-0.821729	7.69343	1258.09	1.50096e-274	5.09409e-273
Bra006692	-2.41031	4.25258	1275.87	2.76209e-274	9.36667e-273
Bra010751	-0.785621	7.91871	1255.49	5.46143e-274	1.85057e-272
Bra025431	-0.507507	12.1858	1380.25	6.7581e-274	2.2881e-272
Bra021385	2.35188	4.3674	1254.48	8.99062e-274	3.04153e-272
Bra021807	-1.19166	6.17652	1253.39	1.54907e-273	5.2363e-272
Bra003560	1.07417	6.59867	1253.12	1.77289e-273	5.98808e-272
Bra015788	-0.806391	7.7746	1251.12	4.78164e-273	1.61375e-271
Bra005053	-1.8131	4.96949	1249.22	1.22575e-272	4.13345e-271
Bra030496	-4.8022	3.07165	1247.13	3.46441e-272	1.16733e-270
Bra015882	-3.31089	3.59521	1246.05	5.93424e-272	1.99794e-270
Bra028271	-1.63787	5.24133	1245.62	7.33261e-272	2.46677e-270
Bra037302	1.52741	5.4927	1244.92	1.03969e-271	3.49486e-270
Bra009491	-1.23365	6.04017	1244.33	1.3933e-271	4.67976e-270
Bra025520	-2.16569	4.46354	1244.16	1.51678e-271	5.09045e-270
Bra035244	0.946217	7.05758	1243	2.69657e-271	9.04274e-270
Bra024205	-1.13998	6.32022	1241.11	6.88734e-271	2.30778e-269
Bra018619	-0.724858	8.33825	1241.02	7.21795e-271	2.41664e-269
Bra029880	-1.88781	4.84266	1240.52	9.25665e-271	3.09676e-269
Bra017355	-1.6405	5.23045	1240.38	9.89666e-271	3.30825e-269
Bra003858	-1.76682	5.02451	1238.43	2.60884e-270	8.71391e-269
Bra019376	-1.84961	4.89927	1237.94	3.33604e-270	1.1134e-268
Bra000441	5.53038	3.07082	1237.62	3.91551e-270	1.30577e-268
Bra011923	0.894987	7.28124	1237.08	5.10121e-270	1.69984e-268
Bra019448	-1.12634	6.35126	1232.11	6.0357e-269	2.00965e-267
Bra018204	4.96602	3.15785	1231.82	6.95588e-269	2.3142e-267
Bra031069	-6.05627	2.85787	1231.31	8.9896e-269	2.98846e-267
Bra021132	-0.718496	8.36329	1230.02	1.70709e-268	5.67048e-267
Bra004423	1.55842	5.41894	1229.8	1.89715e-268	6.29688e-267
Bra030262	1.06309	6.59855	1229.01	2.80974e-268	9.31854e-267
Bra036763	-0.748429	8.11348	1224.56	2.56281e-267	8.4929e-266
Bra030083	-1.21034	6.0781	1224.22	3.03777e-267	1.0059e-265
Bra011536	-1.30207	5.85011	1223.31	4.78213e-267	1.58227e-265
Bra007655	-0.578752	9.95124	1225.15	4.78961e-267	1.5835e-265
Bra005687	-0.81904	7.63799	1222.36	7.64214e-267	2.5246e-265
Bra019866	-0.904152	7.18227	1221.71	1.06055e-266	3.5008e-265
Bra002423	-1.17338	6.18118	1219.56	3.08379e-266	1.01714e-264
Bra006784	-1.22578	6.02298	1218.27	5.8363e-266	1.92352e-264
Bra033350	-1.43662	5.57245	1217.84	7.24145e-266	2.38476e-264
Bra007055	-0.736933	8.18426	1217.17	1.00925e-265	3.32107e-264
Bra003389	-0.699626	8.4922	1216.55	1.37211e-265	4.51161e-264
Bra006304	2.6665	4.07081	1216.1	1.71517e-265	5.63523e-264
Bra006790	-1.43304	5.57643	1215.17	2.72526e-265	8.9469e-264
Bra027049	0.629597	9.21657	1214.12	4.58278e-265	1.50334e-263
Bra018933	1.52067	5.4615	1209.64	4.25812e-264	1.39575e-262
Bra004244	-0.902369	7.16775	1208.76	6.59684e-264	2.16067e-262
Bra013523	-1.26974	5.90621	1208.74	6.6391e-264	2.17282e-262
Bra035190	1.33598	5.79814	1205.92	2.70683e-263	8.85198e-262
Bra033925	1.14806	6.27859	1204.83	4.6533e-263	1.52056e-261
Bra027618	-2.48564	4.10402	1203.47	9.1304e-263	2.98123e-261
Bra002326	-0.8108	7.64686	1203.12	1.08364e-262	3.53554e-261
Bra004022	-2.12649	4.45436	1202.76	1.29744e-262	4.22981e-261
Bra026672	1.74344	5.07862	1202.08	1.81832e-262	5.92338e-261
Bra028187	-0.833392	7.50268	1197.84	1.5002e-261	4.88329e-260
Bra022369	-0.767543	7.91596	1197.74	1.5697e-261	5.10559e-260
Bra020197	2.98278	3.83914	1196.92	2.36872e-261	7.69853e-260
Bra017975	-3.6867	3.35743	1195.65	4.45296e-261	1.44613e-259
Bra040762	2.03587	4.65135	1194.61	7.46177e-261	2.4214e-259
Bra027736	-2.4495	4.12172	1191.66	3.22976e-260	1.04728e-258
Bra021501	1.17554	6.17274	1191.52	3.4674e-260	1.12347e-258
Bra008510	-1.29755	5.8186	1189.72	8.47222e-260	2.74297e-258
Bra029516	-0.97666	6.81483	1189.29	1.04998e-259	3.39682e-258
Bra021754	-1.66578	5.12162	1188.86	1.29499e-259	4.18625e-258
Bra000806	-1.71257	5.0437	1187.91	2.07488e-259	6.70221e-258
Bra022254	-1.5575	5.31072	1189.02	2.4121e-259	7.78553e-258
Bra011686	-3.06645	3.66384	1186.75	3.69935e-259	1.19312e-257
Bra018806	2.90828	3.8717	1184.98	8.90393e-259	2.86953e-257
Bra004261	4.23425	3.27604	1184.02	1.44069e-258	4.63946e-257
Bra027654	2.4241	4.22196	1183.75	1.6457e-258	5.29561e-257
Bra017272	-1.76549	4.95276	1180.92	6.71175e-258	2.15809e-256
Bra018942	2.99733	3.81219	1182.16	8.47803e-258	2.72395e-256
Bra010796	-0.971425	6.8264	1182.87	1.02634e-257	3.29505e-256
Bra005215	-1.85873	4.80033	1179.5	1.36116e-257	4.36667e-256
Bra009882	-1.58028	5.25636	1179.23	1.55585e-257	4.98746e-256
Bra035787	-0.976583	6.79709	1178.52	2.21259e-257	7.08733e-256
Bra011328	-2.47809	4.08027	1177.63	3.4463e-257	1.10308e-255
Bra022034	-2.60718	3.97452	1177.57	3.54057e-257	1.13239e-255
Bra035006	-1.15921	6.15632	1177	4.69738e-257	1.50124e-255
Bra011918	-0.696338	8.4158	1176.25	6.82394e-257	2.17922e-255
Bra002582	-1.54961	5.30561	1175.5	9.89717e-257	3.15826e-255
Bra028988	-1.80353	4.88429	1175.26	1.11564e-256	3.55741e-255
Bra021530	-1.43053	5.53078	1174.58	1.56606e-256	4.98986e-255
Bra004045	-1.32668	5.73416	1172.88	3.63829e-256	1.15838e-254
Bra022531	-1.62987	5.16084	1172.83	3.74186e-256	1.19045e-254
Bra014860	-2.44224	4.10512	1172.49	4.41814e-256	1.40455e-254
Bra027941	-0.925747	6.99598	1171.63	6.7976e-256	2.15936e-254
Bra030231	-1.05291	6.50786	1170.66	1.1009e-255	3.49455e-254
Bra021605	-1.11713	6.27802	1168.95	2.56641e-255	8.14034e-254
Bra014666	-2.4583	4.08657	1168.83	2.73047e-255	8.65421e-254
Bra032894	1.19398	6.0818	1168.07	3.98852e-255	1.26321e-253
Bra016763	-6.07159	2.78319	1167.82	4.51058e-255	1.42748e-253
Bra024367	-0.740533	8.03843	1167.01	6.72672e-255	2.12724e-253
Bra020592	-2.01171	4.5516	1163.79	3.33999e-254	1.05544e-252
Bra029476	1.13412	6.25406	1163.49	3.86924e-254	1.22176e-252
Bra014221	-1.88289	4.73885	1162.58	6.09932e-254	1.9245e-252
Bra014327	-2.31865	4.20387	1162.57	6.12282e-254	1.93047e-252
Bra026353	-2.36394	4.16188	1162.56	6.16407e-254	1.94203e-252
Bra021982	1.25963	5.89881	1156.02	1.59042e-252	5.00698e-251
Bra027323	4.25873	3.23186	1154.32	3.69251e-252	1.16161e-250
Bra009663	-3.37798	3.44603	1153.37	5.92568e-252	1.86275e-250
Bra040998	2.00943	4.6268	1153.31	6.11461e-252	1.92071e-250
Bra026170	-5.13158	2.8929	1152.07	1.13289e-251	3.55597e-250
Bra004267	0.724994	8.13371	1151.18	1.7567e-251	5.50989e-250
Bra000940	-0.877868	7.17568	1149.83	3.44145e-251	1.07861e-249
Bra002596	-0.87782	7.17387	1149.14	4.85521e-251	1.52058e-249
Bra007203	-1.26661	5.8346	1148.76	5.86467e-251	1.83536e-249
Bra027476	1.82642	4.87431	1143.31	8.82042e-250	2.75833e-248
Bra027273	-0.777869	7.72195	1142.53	1.30022e-249	4.06304e-248
Bra015574	-0.686449	8.41118	1141.82	1.8477e-249	5.76958e-248
Bra036327	-1.05201	6.459	1141.66	1.99688e-249	6.2308e-248
Bra019179	-1.01599	6.58738	1139.56	5.66813e-249	1.7673e-247
Bra019320	2.0031	4.61412	1139.5	5.83574e-249	1.81822e-247
Bra036353	-2.07334	4.43085	1138.82	8.18225e-249	2.54743e-247
Bra000647	-1.1933	5.99258	1137.84	2.94011e-248	9.14686e-247
Bra009364	-2.23075	4.25043	1131.43	3.22632e-247	1.00299e-245
Bra034212	-1.43895	5.46147	1131.39	3.29192e-247	1.02263e-245
Bra010785	4.19765	3.21868	1130.54	5.02069e-247	1.55852e-245
Bra016520	-1.27366	5.79131	1130.22	5.89932e-247	1.82992e-245
Bra001747	-1.05238	6.43366	1127.38	2.41378e-246	7.48185e-245
Bra037607	0.852406	7.28305	1127.33	2.48307e-246	7.69096e-245
Bra016672	-0.757009	7.81796	1124.24	1.15064e-245	3.56134e-244
Bra013517	-0.633083	8.88431	1124.03	1.27828e-245	3.95347e-244
Bra013832	-0.700636	8.24112	1123.29	1.84758e-245	5.71002e-244
Bra024532	-0.832348	7.35432	1122.64	2.55796e-245	7.8997e-244
Bra028666	-0.952641	6.79327	1120.96	5.8969e-245	1.8198e-243
Bra024181	-0.930562	6.88039	1119.48	1.22539e-244	3.77882e-243
Bra004522	-1.3235	5.67067	1119.43	1.25748e-244	3.87496e-243
Bra007225	-2.1599	4.3068	1118.89	1.64586e-244	5.06805e-243
Bra028944	-1.65017	5.04971	1117.9	2.6876e-244	8.2698e-243
Bra021558	-3.22208	3.47974	1116.83	4.59321e-244	1.41231e-242
Bra024638	-2.0462	4.43426	1116.89	7.83273e-244	2.40664e-242
Bra023711	-1.59779	5.13298	1113.33	2.61442e-243	8.02708e-242
Bra012845	3.32485	3.53776	1113.11	2.90929e-243	8.92591e-242
Bra022553	1.04863	6.4547	1111.86	5.44021e-243	1.66788e-241
Bra012469	1.4655	5.43044	1111.36	6.94751e-243	2.12845e-241
Bra009090	-1.30563	5.69784	1111.29	7.21729e-243	2.2095e-241
Bra013018	-0.609803	9.10257	1108.97	2.27993e-242	6.97471e-241
Bra033291	-4.37483	3.00546	1108.65	2.67659e-242	8.18223e-241
Bra002914	0.721307	8.05807	1109.81	3.18003e-242	9.71417e-241
Bra037701	-0.883385	7.06492	1105.89	1.0554e-241	3.22165e-240
Bra024032	1.72177	4.98379	1105.77	1.12317e-241	3.42603e-240
Bra032619	-1.05879	6.36954	1105.08	1.57665e-241	4.80583e-240
Bra007434	1.86657	4.75389	1102.39	6.01732e-241	1.83283e-239
Bra008430	-0.654751	8.59012	1101.03	1.18424e-240	3.60449e-239
Bra017035	6.9112	2.77284	1099.67	2.32474e-240	7.07075e-239
Bra006088	1.84429	4.78148	1099.65	2.35061e-240	7.14428e-239
Bra037453	-1.72605	4.89406	1096.02	1.43096e-239	4.34603e-238
Bra028935	-1.4184	5.44934	1095.33	2.00996e-239	6.10014e-238
Bra015696	-1.32066	5.64199	1095.1	2.25242e-239	6.83111e-238
Bra002221	-0.722819	7.99246	1095.01	2.35956e-239	7.15089e-238
Bra008426	-0.95541	6.7328	1093.69	4.55939e-239	1.38078e-237
Bra002665	-0.76722	7.67574	1092.98	6.47606e-239	1.95982e-237
Bra036846	-1.61008	5.07876	1090.66	2.0555e-238	6.21602e-237
Bra034404	0.807704	7.44834	1090.3	2.45858e-238	7.42963e-237
Bra027089	-1.81086	4.7412	1090.26	2.50702e-238	7.57059e-237
Bra000754	-1.26093	5.76601	1090.24	2.53571e-238	7.65176e-237
Bra012922	-1.89064	4.61897	1091.54	2.57907e-238	7.77704e-237
Bra009783	-2.50259	3.94533	1087.56	9.57624e-238	2.88559e-236
Bra030986	-1.45364	5.3654	1087.42	1.02932e-237	3.09942e-236
Bra040157	-1.44452	5.38533	1087.26	1.11321e-237	3.34963e-236
Bra032370	4.56746	3.0601	1086.24	1.84612e-237	5.551e-236
Bra007983	2.59073	3.96617	1085.99	2.09706e-237	6.30103e-236
Bra012747	1.19746	5.94511	1084.6	4.18167e-237	1.25557e-235
Bra024335	-1.86614	4.64386	1082.97	9.38526e-237	2.81598e-235
Bra000985	-2.73296	3.75645	1083.76	1.30467e-236	3.91177e-235
Bra026417	1.87916	4.7036	1082.03	1.50014e-236	4.49467e-235
Bra024660	-2.64649	3.82201	1082.01	1.51479e-236	4.53535e-235
Bra006341	-1.27574	5.71796	1080.26	3.62267e-236	1.08387e-234
Bra001490	1.68676	4.99913	1079.69	4.7993e-236	1.43489e-234
Bra026489	1.41564	5.48219	1078.99	6.81764e-236	2.03689e-234
Bra036701	-1.01568	6.47907	1078.48	8.77894e-236	2.62101e-234
Bra006963	-0.828099	7.28428	1077.37	1.52494e-235	4.54958e-234
Bra008998	-1.32161	5.61766	1077.3	1.57325e-235	4.6904e-234
Bra019178	-3.04211	3.53177	1076.52	2.32197e-235	6.91771e-234
Bra008271	0.82981	7.29506	1075.97	3.05883e-235	9.10656e-234
Bra024809	-2.81605	3.68353	1074.93	5.11842e-235	1.52275e-233
Bra015607	-0.890952	6.96925	1074.39	6.68874e-235	1.98852e-233
Bra006966	-1.96622	4.47771	1073.19	1.21804e-234	3.6186e-233
Bra000889	5.72794	2.84163	1072.25	1.94234e-234	5.76634e-233
Bra010852	-0.863523	7.08983	1071.13	3.3874e-234	1.00493e-232
Bra006118	-1.34879	5.55277	1071.18	5.90777e-234	1.75141e-232
Bra035917	1.50912	5.28328	1066.96	2.69903e-233	7.99588e-232
Bra018040	2.05791	4.43058	1066.88	2.80617e-233	8.30743e-232
Bra036303	-2.09411	4.30851	1066.79	2.94077e-233	8.6998e-232
Bra011511	-1.21145	5.8453	1066.22	3.90413e-233	1.15417e-231
Bra016945	-2.65687	3.79089	1065.83	4.73313e-233	1.39826e-231
Bra011715	-2.65701	3.79227	1066.55	5.86662e-233	1.7319e-231
Bra022502	-1.40381	5.43615	1065.34	6.03799e-233	1.78125e-231
Bra009595	-0.793499	7.44982	1064.96	7.28191e-233	2.14671e-231
Bra034424	-2.79591	3.6833	1064.79	7.93968e-233	2.33899e-231
Bra027662	-1.28112	5.68455	1064.58	8.81831e-233	2.59602e-231
Bra018850	-2.10419	4.29575	1064.57	8.84773e-233	2.60286e-231
Bra009608	-2.37174	4.02804	1063.25	1.7072e-232	5.01882e-231
Bra011460	1.67868	4.98678	1062.29	2.74413e-232	8.06154e-231
Bra011526	-1.48991	5.25464	1060.37	7.14079e-232	2.09632e-230
Bra004721	-1.02995	6.39124	1060.06	8.34759e-232	2.4489e-230
Bra003835	-0.732495	7.83412	1059.79	9.54957e-232	2.79957e-230
Bra036573	1.13798	6.06645	1059.67	1.01271e-231	2.96681e-230
Bra020051	0.977764	6.61905	1059.57	1.06346e-231	3.11333e-230
Bra011783	-1.37437	5.48595	1058.27	2.02933e-231	5.93684e-230
Bra034088	-1.49558	5.23723	1056.42	5.09235e-231	1.48874e-229
Bra037529	-1.50336	5.22037	1054.89	1.09358e-230	3.19487e-229
Bra000937	-1.10436	6.11915	1052.86	2.99705e-230	8.74972e-229
Bra010441	2.06477	4.39813	1051.5	5.88356e-230	1.71648e-228
Bra036193	-0.865706	7.03873	1050.98	7.61739e-230	2.22078e-228
Bra021408	-1.33454	5.55423	1050.78	8.43442e-230	2.45728e-228
Bra006288	-3.90729	3.0795	1050.46	9.86303e-230	2.87151e-228
Bra010980	1.39433	5.48123	1050.1	1.18194e-229	3.4387e-228
Bra001683	-1.53173	5.16305	1051.35	1.20772e-229	3.51128e-228
Bra001003	-2.10433	4.27357	1049.08	1.96019e-229	5.6951e-228
Bra016415	1.1282	6.07694	1048.57	2.53385e-229	7.3567e-228
Bra010643	-0.872072	7.00455	1048.19	3.05306e-229	8.85807e-228
Bra032988	-1.88304	4.5604	1047.91	3.50518e-229	1.01629e-227
Bra029549	1.6603	4.99478	1047.27	4.83115e-229	1.39977e-227
Bra037207	-0.580017	9.26041	1047.11	5.23784e-229	1.51657e-227
Bra037682	-0.658255	8.39859	1046.61	6.69032e-229	1.93579e-227
Bra025481	2.10784	4.34498	1046.48	7.15436e-229	2.06863e-227
Bra028912	-1.81293	4.66836	1045.89	9.60274e-229	2.77467e-227
Bra015174	-1.34588	5.52341	1045.48	1.17733e-228	3.39951e-227
Bra018714	-1.58926	5.05008	1045.48	1.17912e-228	3.40236e-227
Bra024588	-3.00518	3.50871	1042.84	4.36731e-228	1.25932e-226
Bra033482	-4.43187	2.89958	1039.97	1.82077e-227	5.24666e-226
Bra000011	1.7658	4.81035	1039.54	2.25969e-227	6.50698e-226
Bra028406	-0.454657	11.7281	1039.66	4.59331e-227	1.32178e-225
Bra022315	-0.872828	6.97964	1037.29	6.92705e-227	1.99199e-225
Bra034674	-0.74472	7.68987	1036.16	1.21067e-226	3.4791e-225
Bra016642	-1.80058	4.66989	1034.95	2.21809e-226	6.36979e-225
Bra002839	-1.821	4.63595	1034.76	2.43176e-226	6.97865e-225
Bra029319	-1.41675	5.36056	1034.42	2.88756e-226	8.28106e-225
Bra012282	-0.73657	7.74111	1034.23	3.1605e-226	9.05765e-225
Bra029842	1.69349	4.91996	1033.16	5.40245e-226	1.54723e-224
Bra008849	1.13503	6.0255	1030.96	1.61415e-225	4.61972e-224
Bra015668	-0.889792	6.89214	1032.57	1.94952e-225	5.57575e-224
Bra011053	0.97779	6.56669	1030.15	2.41149e-225	6.89236e-224
Bra024284	-1.37654	5.43845	1030.02	2.57755e-225	7.36197e-224
Bra037470	-1.82089	4.62746	1029.07	4.11742e-225	1.17522e-223
Bra000583	-1.33599	5.51996	1028.99	4.29011e-225	1.22368e-223
Bra013653	-0.594376	9.00718	1027.25	1.0196e-224	2.90628e-223
Bra025340	3.22781	3.46852	1027.19	1.05188e-224	2.99627e-223
Bra036060	-2.08504	4.26624	1027.11	1.09157e-224	3.10722e-223
Bra002973	-0.716178	7.8709	1028.89	1.1414e-224	3.24688e-223
Bra000837	-0.582576	9.14266	1024.24	4.55215e-224	1.29405e-222
Bra007819	-0.651208	8.39267	1023.14	7.87542e-224	2.23726e-222
Bra009987	-1.1466	5.94883	1027.8	9.82756e-224	2.78994e-222
Bra037955	2.52376	3.93297	1022.65	1.00742e-223	2.85803e-222
Bra015719	1.00056	6.46382	1021.93	1.44028e-223	4.08331e-222
Bra025579	-1.9636	4.39693	1021.43	1.84272e-223	5.22074e-222
Bra022266	-0.993328	6.45609	1021.27	2.00137e-223	5.66642e-222
Bra003448	2.66611	3.819	1019.48	4.87405e-223	1.37905e-221
Bra018988	1.2822	5.65959	1019.09	5.91089e-223	1.67129e-221
Bra012720	-1.68963	4.83196	1018.64	7.41037e-223	2.09386e-221
Bra037493	-3.83199	3.06221	1018.23	9.07236e-223	2.56176e-221
Bra019860	-1.9204	4.4532	1017.42	1.35712e-222	3.82953e-221
Bra026642	2.60643	3.8695	1022.6	1.91843e-222	5.40981e-221
Bra038411	-2.81589	3.597	1015.59	3.3648e-222	9.48214e-221
Bra010984	-1.01672	6.3493	1013.43	9.85461e-222	2.77521e-220
Bra009459	-1.02406	6.32267	1013.14	1.13937e-221	3.2065e-220
Bra027659	-1.89591	4.48364	1013.1	1.16481e-221	3.27591e-220
Bra030316	-0.717388	7.822	1013.04	1.19792e-221	3.36679e-220
Bra017710	-0.997579	6.42114	1012.59	1.49665e-221	4.20357e-220
Bra013209	1.25581	5.70329	1010.37	4.52814e-221	1.27095e-219
Bra018122	-1.06825	6.16031	1010.16	5.01876e-221	1.40772e-219
Bra023172	-1.17443	5.85175	1009.6	6.63179e-221	1.85893e-219
Bra015547	1.69896	4.86962	1008.15	1.36675e-220	3.82852e-219
Bra014663	-0.797774	7.29641	1007.3	2.0801e-220	5.82291e-219
Bra017317	-1.07587	6.12911	1006.87	2.58702e-220	7.23712e-219
Bra029971	1.7623	4.76014	1006.46	3.17045e-220	8.8634e-219
Bra017502	-0.743911	7.62066	1006.15	3.68903e-220	1.03063e-218
Bra024902	-1.91157	4.44753	1006.02	3.94686e-220	1.10193e-218
Bra029069	2.56014	3.88189	1005.79	4.40886e-220	1.23011e-218
Bra004479	-1.52139	5.10839	1004.96	6.69323e-220	1.86623e-218
Bra031630	-1.69467	4.79941	1004.95	6.71317e-220	1.87055e-218
Bra000282	4.29831	3.01779	1003.69	1.25679e-219	3.49959e-218
Bra010775	-1.05605	6.1871	1002.94	1.82362e-219	5.07461e-218
Bra015274	-1.04332	6.23208	1002.66	2.09293e-219	5.82019e-218
Bra014417	-2.17949	4.13256	1003.85	2.79834e-219	7.77674e-218
Bra032166	1.11445	6.0318	1001.11	4.52679e-219	1.25719e-217
Bra027800	-1.31865	5.51528	1000.51	6.12615e-219	1.70025e-217
Bra024900	-3.92359	3.0053	1001.13	7.86273e-219	2.18078e-217
Bra007110	-1.52084	5.10017	998.203	1.92659e-218	5.34001e-217
Bra024415	-1.73064	4.723	997.44	2.8157e-218	7.7993e-217
Bra034561	1.29899	5.5914	996.78	3.9115e-218	1.08275e-216
Bra023995	1.18916	5.83349	996.37	4.79484e-218	1.32639e-216
Bra009794	-1.14327	5.90855	996.085	5.52545e-218	1.5275e-216
Bra004630	-1.66279	4.8397	995.892	6.08224e-218	1.68032e-216
Bra011916	-0.8581	6.96314	995.63	6.93053e-218	1.91342e-216
Bra005175	-0.844532	7.02662	995.236	8.43267e-218	2.32662e-216
Bra023560	-1.85136	4.51998	994.974	9.60471e-218	2.64826e-216
Bra030498	1.06222	6.189	994.414	1.26927e-217	3.4974e-216
Bra016381	1.3785	5.42683	993.415	2.08657e-217	5.74569e-216
Bra029936	-2.05574	4.24983	993.026	2.53152e-217	6.96639e-216
Bra005310	1.3758	5.43213	992.977	2.59372e-217	7.13289e-216
Bra033415	-0.74893	7.55115	991.329	5.89191e-217	1.61926e-215
Bra036492	-2.0093	4.30035	991.079	6.67173e-217	1.83238e-215
Bra009620	-1.19391	5.77382	990.503	8.88645e-217	2.43906e-215
Bra007210	-0.940478	6.60248	990.481	8.98321e-217	2.46402e-215
Bra017498	-0.828281	7.09692	990.296	9.84936e-217	2.69984e-215
Bra034242	-1.18719	5.79047	990.02	1.1296e-216	3.09436e-215
Bra015052	-1.14767	5.88802	988.696	7.03548e-216	1.92601e-214
Bra015731	2.29406	4.07731	984.935	1.4188e-215	3.88156e-214
Bra028477	3.51363	3.26797	984.354	1.89406e-215	5.17839e-214
Bra026948	-0.481044	10.7039	982.4	5.00985e-215	1.36882e-213
Bra013423	4.34434	2.97218	982.24	5.42502e-215	1.48129e-213
Bra018953	2.25032	4.11393	982.021	6.04898e-215	1.6506e-213
Bra005980	-0.845102	6.99492	981.817	6.6939e-215	1.8254e-213
Bra032849	-1.15668	5.85164	981.214	9.03624e-215	2.46255e-213
Bra041077	1.44405	5.27329	980.999	1.00572e-214	2.73901e-213
Bra007572	-1.01001	6.30978	980.708	1.16223e-214	3.16321e-213
Bra020052	1.47981	5.20322	979.266	2.38293e-214	6.48139e-213
Bra017563	1.35259	5.45911	979.04	2.66642e-214	7.2478e-213
Bra022242	-1.08379	6.0477	978.328	3.80025e-214	1.03231e-212
Bra033570	-2.80477	3.54815	978.095	4.26718e-214	1.1584e-212
Bra004290	1.62162	4.95083	977.343	6.20203e-214	1.68256e-212
Bra026273	3.3383	3.3417	977.078	7.07881e-214	1.91919e-212
Bra010528	1.13697	5.93123	976.359	1.01236e-213	2.74294e-212
Bra015878	-0.811572	7.15138	976.329	1.02768e-213	2.78265e-212
Bra010102	-1.50566	5.09129	974.663	2.35351e-213	6.36853e-212
Bra026157	-1.33451	5.44026	973.306	4.6258e-213	1.25092e-211
Bra000699	-1.86845	4.4559	973.197	4.88316e-213	1.31967e-211
Bra017473	-1.48507	5.1264	972.441	7.11261e-213	1.92095e-211
Bra013684	-1.54065	5.02193	972.166	8.15582e-213	2.20129e-211
Bra029393	6.42103	2.63826	970.935	1.50499e-212	4.05942e-211
Bra036447	1.10645	5.99925	968.764	4.43254e-212	1.19483e-210
Bra003916	0.991197	6.38789	966.169	1.61328e-211	4.34596e-210
Bra034620	-0.727392	7.62942	966.154	1.62516e-211	4.37517e-210
Bra036797	1.07302	6.09885	966.009	1.74659e-211	4.6991e-210
Bra021222	1.39951	5.33815	966.531	1.84971e-211	4.97335e-210
Bra014981	1.51156	5.12183	964.942	2.97016e-211	7.98085e-210
Bra018448	-1.79613	4.55674	964.79	3.20427e-211	8.60441e-210
Bra025735	2.05222	4.29042	964.78	3.2201e-211	8.64141e-210
Bra028645	-1.05317	6.12218	963.964	4.83174e-211	1.29582e-209
Bra002031	-1.54296	5.00423	963.813	5.21041e-211	1.39648e-209
Bra033046	-1.15314	5.83015	961.902	1.34827e-210	3.6113e-209
Bra036281	-2.24636	4.00401	961.625	1.54765e-210	4.14272e-209
Bra032316	0.97711	6.43138	960.568	2.6189e-210	7.00576e-209
Bra007761	-1.00952	6.27125	960.029	3.42609e-210	9.15925e-209
Bra030759	-1.04859	6.13057	959.96	3.54424e-210	9.46912e-209
Bra021187	-0.571282	9.04272	959.113	5.40485e-210	1.44309e-208
Bra017633	0.977995	6.42251	958.365	7.84256e-210	2.09264e-208
Bra012746	-1.11161	5.93213	958.297	8.10963e-210	2.16253e-208
Bra037362	-1.11866	5.91291	958.271	8.21746e-210	2.1899e-208
Bra016604	-1.41871	5.23296	957.535	1.18529e-209	3.15587e-208
Bra021735	-1.99772	4.26416	957.534	1.18571e-209	3.15587e-208
Bra008255	-1.05107	6.1171	956.889	1.63492e-209	4.34871e-208
Bra035875	-1.12323	5.89863	956.579	1.90728e-209	5.06997e-208
Bra018000	-1.10774	5.94045	956.092	2.42976e-209	6.45478e-208
Bra006736	1.66218	4.84233	955.908	2.6632e-209	7.07047e-208
Bra034848	1.73382	4.71959	955.265	3.66755e-209	9.73076e-208
Bra022734	-0.937294	6.53861	951.043	2.99956e-208	7.95345e-207
Bra004029	-1.04768	6.11488	950.31	4.3199e-208	1.14472e-206
Bra006908	1.13063	5.90478	949.812	5.53467e-208	1.4657e-206
Bra021042	-0.766325	7.34222	949.8	5.56813e-208	1.47363e-206
Bra002671	-1.82327	4.47881	946.256	3.24944e-207	8.59442e-206
Bra023450	2.70639	3.67559	944.767	6.81851e-207	1.80229e-205
Bra039301	-0.69574	7.79575	944.431	8.05915e-207	2.12889e-205
Bra025710	-1.51907	5.01466	944.225	8.93122e-207	2.35778e-205
Bra023510	-5.80715	2.52686	944.13	9.36205e-207	2.46997e-205
Bra018294	-2.03612	4.20055	944.021	9.88612e-207	2.6066e-205
Bra020409	10.969	2.47111	943.881	1.05995e-206	2.79293e-205
Bra027355	0.938049	6.55147	943.409	1.34014e-206	3.52903e-205
Bra029355	2.15393	4.14908	942.135	2.52686e-206	6.6499e-205
Bra038621	-0.81377	7.06102	941.482	3.49675e-206	9.19662e-205
Bra011411	1.33217	5.44036	941.392	3.65861e-206	9.61633e-205
Bra017277	0.945031	6.51681	940.152	6.78177e-206	1.78142e-204
Bra022186	-1.17667	5.73448	938.5	1.54346e-205	4.05179e-204
Bra029638	-1.06647	6.02705	937.901	2.07961e-205	5.45587e-204
Bra027962	-1.04596	6.09315	937.384	2.68947e-205	7.05146e-204
Bra015863	1.09452	5.97893	936.879	3.45792e-205	9.06062e-204
Bra031924	-1.98653	4.24651	936.721	3.7404e-205	9.79471e-204
Bra032750	0.596573	8.67034	934.955	9.0092e-205	2.35771e-203
Bra016765	-1.3183	5.41067	934.543	1.10608e-204	2.89283e-203
Bra016261	-0.821261	7.00879	934.318	1.23711e-204	3.2335e-203
Bra002371	1.47969	5.13169	934.58	1.50102e-204	3.92088e-203
Bra024273	-1.53829	4.96219	933.572	1.79399e-204	4.68325e-203
Bra004389	0.69725	7.77284	933.51	1.85015e-204	4.82686e-203
Bra006553	-0.658624	8.05742	933.213	2.14418e-204	5.5905e-203
Bra010084	-1.30121	5.44553	932.254	3.45709e-204	9.00808e-203
Bra031708	-2.40076	3.81029	931.738	4.46939e-204	1.16386e-202
Bra034413	-0.946532	6.4555	930.524	8.17831e-204	2.12838e-202
Bra021327	-0.53672	9.40158	930.237	9.43585e-204	2.45414e-202
Bra022219	-1.83686	4.42114	926.48	6.12261e-203	1.59143e-201
Bra025660	0.842308	6.91354	925.722	8.93064e-203	2.31988e-201
Bra011687	-3.10736	3.27085	925.421	1.03723e-202	2.6927e-201
Bra027540	-1.637	4.75792	923.933	2.17619e-202	5.64605e-201
Bra019932	-1.3189	5.39014	923.907	2.20371e-202	5.71392e-201
Bra023235	-0.497758	10.0309	923.487	2.71641e-202	7.03898e-201
Bra025534	-0.568827	8.93367	922.537	4.35898e-202	1.12884e-200
Bra006572	-0.719988	7.56519	922.32	4.85536e-202	1.25662e-200
Bra026461	2.53872	3.77081	921.976	5.76486e-202	1.49109e-200
Bra005964	-1.05783	6.0238	921.906	5.9688e-202	1.54289e-200
Bra008032	-2.50553	3.69742	920.813	1.02857e-201	2.65716e-200
Bra019672	-1.56912	4.88095	920.614	1.13526e-201	2.93098e-200
Bra009543	-1.37025	5.27234	920.375	1.27915e-201	3.30043e-200
Bra016230	-3.32697	3.13862	919.367	2.11289e-201	5.4483e-200
Bra024020	-0.91453	6.56442	918.774	2.8374e-201	7.31207e-200
Bra015514	4.39422	2.86521	918.647	3.02347e-201	7.78682e-200
Bra038835	0.663514	7.98485	916.808	7.55075e-201	1.94348e-199
Bra033431	-1.49208	5.01844	915.957	1.1533e-200	2.96664e-199
Bra037382	-1.38437	5.23243	915.626	1.36022e-200	3.4968e-199
Bra025696	-1.06505	5.98903	915.115	1.75386e-200	4.50599e-199
Bra009499	-0.884255	6.67949	914.926	1.9274e-200	4.94884e-199
Bra020154	-1.33682	5.3351	914.799	2.05352e-200	5.26944e-199
Bra013872	-3.07688	3.27167	914.428	2.46924e-200	6.33235e-199
Bra018873	-1.58564	4.83644	914.005	3.04839e-200	7.81284e-199
Bra018693	-0.976878	6.29619	913.561	3.80272e-200	9.74022e-199
Bra030159	-1.92579	4.28303	912.839	5.44765e-200	1.39451e-198
Bra015850	-0.666584	7.92897	912.318	7.0618e-200	1.8066e-198
Bra021653	1.00283	6.23123	911.793	9.16945e-200	2.34438e-198
Bra002669	-0.93616	6.45617	911.481	1.07086e-199	2.73624e-198
Bra028893	1.27191	5.51695	911.13	1.27553e-199	3.25724e-198
Bra034141	-1.31007	5.38601	910.11	2.11923e-199	5.40845e-198
Bra022587	3.86084	3.01336	909.542	2.81166e-199	7.17126e-198
Bra013828	3.41024	3.20318	910.55	4.29801e-199	1.09556e-197
Bra016607	1.30994	5.43136	908.309	5.1957e-199	1.32359e-197
Bra017764	-2.20118	3.96572	907.765	6.81312e-199	1.73457e-197
Bra029869	-1.57966	4.83471	907.484	7.8353e-199	1.99361e-197
Bra011109	-1.36686	5.25529	907.043	9.76125e-199	2.48215e-197
Bra034762	-4.97119	2.59672	906.992	1.0011e-198	2.54412e-197
Bra024634	1.32633	5.39174	906.335	1.38858e-198	3.5267e-197
Bra036542	1.63388	4.80192	906.162	1.51304e-198	3.84049e-197
Bra003970	-1.81197	4.41996	905.109	2.55618e-198	6.48436e-197
Bra039748	-1.12032	5.81894	904.159	4.10159e-198	1.03984e-196
Bra041056	-1.46714	5.04203	902.396	9.86689e-198	2.49997e-196
Bra020124	-0.803697	7.02032	901.148	1.83717e-197	4.65203e-196
Bra000854	-0.848878	6.80231	900.898	2.08024e-197	5.26436e-196
Bra035561	1.80758	4.50165	900.677	2.32182e-197	5.8722e-196
Bra019324	2.89407	3.47178	900.334	2.75449e-197	6.9623e-196
Bra000534	-1.5273	4.92508	899.831	3.53913e-197	8.94022e-196
Bra031790	0.681076	7.79134	897.657	1.0448e-196	2.63769e-195
Bra023045	1.09256	5.91595	897.611	1.06866e-196	2.69632e-195
Bra036724	-0.963305	6.31403	897.136	1.35395e-196	3.41408e-195
Bra010954	-1.25884	5.48073	896.707	1.6762e-196	4.22415e-195
Bra037639	1.85439	4.4242	897.252	2.72417e-196	6.86102e-195
Bra011757	-1.98264	4.186	895.575	2.94593e-196	7.4151e-195
Bra014842	2.72134	3.59192	899.876	3.56377e-196	8.96489e-195
Bra015881	2.85204	3.49121	895.161	3.62005e-196	9.10103e-195
Bra027317	-2.43414	3.72036	895.159	3.62311e-196	9.1033e-195
Bra027967	1.42051	5.17561	894.938	4.04464e-196	1.01564e-194
Bra015348	-1.36667	5.235	894.714	4.52257e-196	1.13497e-194
Bra035881	-1.37249	5.22151	894.627	4.72264e-196	1.18448e-194
Bra032137	1.31908	5.38651	894.047	6.30218e-196	1.5797e-194
Bra016262	0.686407	7.74094	893.937	6.65744e-196	1.66776e-194
Bra031762	-0.822169	6.90632	891.552	2.18347e-195	5.46657e-194
Bra000557	-4.23273	2.74223	891.468	2.27651e-195	5.69613e-194
Bra016470	-0.532492	9.29435	891.432	2.31816e-195	5.7969e-194
Bra003200	1.56937	4.88865	889.337	6.57947e-195	1.64432e-193
Bra013632	-0.970704	6.26748	889.097	7.41485e-195	1.852e-193
Bra007041	-0.529902	9.31983	888.583	9.57426e-195	2.38994e-193
Bra022827	1.58955	4.84715	887.769	1.43577e-194	3.58187e-193
Bra029761	-1.90678	4.26493	886.95	2.1589e-194	5.3827e-193
Bra037462	-1.0904	5.86876	886.948	2.16084e-194	5.38437e-193
Bra021740	-2.16958	3.96477	885.916	3.61372e-194	8.99932e-193
Bra006248	-0.749815	7.27822	885.567	4.29855e-194	1.06984e-192
Bra003774	3.27847	3.22487	884.907	5.97201e-194	1.48547e-192
Bra002450	-1.68823	4.58765	883.019	1.52875e-193	3.80034e-192
Bra001140	1.18283	5.66566	882.424	2.05622e-193	5.10858e-192
Bra026133	2.21712	3.99414	882.002	2.53738e-193	6.3003e-192
Bra007862	-1.38086	5.17774	880.638	5.00482e-193	1.24196e-191
Bra015961	-1.30043	5.35451	879.912	7.1843e-193	1.78176e-191
Bra039115	-0.636949	8.07684	879.78	7.67081e-193	1.9013e-191
Bra001451	-1.26041	5.44517	878.42	1.51021e-192	3.74104e-191
Bra039460	1.75223	4.54658	878.126	1.74852e-192	4.32881e-191
Bra005854	1.18667	5.64989	877.806	2.05013e-192	5.07253e-191
Bra028729	1.49258	5.0085	877.781	2.07634e-192	5.13437e-191
Bra030911	1.26395	5.47737	876.255	4.43847e-192	1.0969e-190
Bra031247	-0.683656	7.6888	875.624	6.07679e-192	1.50091e-190
Bra037877	1.41501	5.16265	881.579	7.37558e-192	1.82063e-190
Bra035054	-0.587664	8.5361	874.328	1.15853e-191	2.85812e-190
Bra009293	-1.36221	5.21003	875.674	1.27795e-191	3.15087e-190
Bra010713	4.28489	2.82421	874.119	1.28583e-191	3.16847e-190
Bra025914	-2.15167	3.96318	873.75	1.54541e-191	3.80587e-190
Bra006372	-1.80629	4.38084	876.958	2.69592e-191	6.63537e-190
Bra039937	-2.29918	3.80893	871.603	4.50217e-191	1.10746e-189
Bra002537	-1.14515	5.69995	871.569	4.57835e-191	1.12554e-189
Bra022794	-2.32541	3.7819	871.039	5.96119e-191	1.46464e-189
Bra040161	-0.688947	7.63245	869.299	1.41807e-190	3.4821e-189
Bra032613	-2.65952	3.48141	868.406	2.21208e-190	5.42868e-189
Bra033549	3.14485	3.2669	867.608	3.29086e-190	8.07141e-189
Bra035429	-2.56968	3.55025	866.792	4.94066e-190	1.21108e-188
Bra016644	-1.43218	5.04672	865.69	8.55425e-190	2.09564e-188
Bra025212	-1.25552	5.43231	864.992	1.21104e-189	2.96512e-188
Bra038688	2.19919	3.98223	864.487	1.55769e-189	3.81165e-188
Bra039116	1.39887	5.1606	862.616	3.95445e-189	9.67085e-188
Bra028510	2.07148	4.10932	861.831	5.847e-189	1.42909e-187
Bra013077	1.33305	5.29777	861.723	6.17006e-189	1.50718e-187
Bra029730	-1.59561	4.71458	860.925	9.18185e-189	2.24158e-187
Bra000256	-2.58597	3.5261	860.146	1.35345e-188	3.30229e-187
Bra025305	-0.76717	7.11309	859.569	1.80389e-188	4.39878e-187
Bra034851	-1.51867	4.86049	858.471	3.11697e-188	7.59634e-187
Bra030934	-3.98719	2.76533	858.31	3.37634e-188	8.22369e-187
Bra032697	0.679843	7.6843	857.948	4.04335e-188	9.84264e-187
Bra017503	-0.629546	8.06923	857.247	5.7331e-188	1.39479e-186
Bra038904	-0.992888	6.11249	856.966	6.59571e-188	1.60373e-186
Bra033441	-1.23026	5.47471	855.173	1.61036e-187	3.91327e-186
Bra006603	-1.42116	5.04686	854.182	2.63907e-187	6.40942e-186
Bra014435	1.757	4.49072	853.82	3.15967e-187	7.66938e-186
Bra012865	1.22536	5.51972	852.115	7.38634e-187	1.79184e-185
Bra030070	1.69577	4.58869	852.096	7.45858e-187	1.80832e-185
Bra014354	-1.57802	4.72978	851.919	8.14548e-187	1.97372e-185
Bra034128	-0.633748	8.01015	850.331	1.79641e-186	4.35037e-185
Bra034193	0.919668	6.41516	849.378	2.88721e-186	6.98795e-185
Bra012595	-0.705251	7.45646	846.972	9.56912e-186	2.3147e-184
Bra038967	1.2358	5.48715	846.37	1.29209e-185	3.12368e-184
Bra019693	1.38258	5.16333	845.792	1.72243e-185	4.16166e-184
Bra032150	0.612152	8.2042	845.777	1.73548e-185	4.19077e-184
Bra012925	1.42492	5.07411	843.343	5.8332e-185	1.40778e-183
Bra025003	-1.44284	4.98182	842.229	1.01619e-184	2.45107e-183
Bra041073	-1.29338	5.29877	842.049	1.11143e-184	2.67924e-183
Bra012269	-0.880692	6.53587	842.039	1.11721e-184	2.69164e-183
Bra026565	-1.36075	5.14823	841.352	1.57253e-184	3.78645e-183
Bra005933	0.824958	6.80189	841.086	1.79546e-184	4.32079e-183
Bra016270	-0.724948	7.31141	840.528	2.37171e-184	5.70427e-183
Bra035549	-1.93411	4.15437	840.514	2.38781e-184	5.73973e-183
Bra024187	-0.849115	6.66466	839.901	3.24057e-184	7.78511e-183
Bra008157	4.16444	2.80351	839.764	3.47006e-184	8.32942e-183
Bra002411	-0.782067	6.98436	839.763	3.47109e-184	8.32942e-183
Bra025740	-1.68545	4.50119	837.28	1.19544e-183	2.86702e-182
Bra014461	2.67704	3.51598	837.066	1.33022e-183	3.18844e-182
Bra019777	-6.83987	2.28062	835.894	2.38445e-183	5.71213e-182
Bra034007	-1.45226	4.94991	835.414	3.02827e-183	7.25032e-182
Bra007177	-5.94628	2.35198	835.318	3.17773e-183	7.60384e-182
Bra018864	-1.66125	4.53888	834.747	4.22176e-183	1.00963e-181
Bra025760	-1.04664	5.89414	834.633	4.46832e-183	1.06799e-181
Bra004320	2.53612	3.62268	833.6	7.47825e-183	1.7864e-181
Bra027359	-2.60365	3.46538	833.483	7.92725e-183	1.89258e-181
Bra004940	-0.940572	6.25866	832.861	1.08063e-182	2.57847e-181
Bra039557	-1.09887	5.74899	832.326	1.41034e-182	3.36328e-181
Bra026936	1.09485	5.79367	832.09	1.58648e-182	3.78121e-181
Bra039227	-0.664203	7.70348	832.031	1.63353e-182	3.89114e-181
Bra035477	1.27158	5.3772	831.751	1.87836e-182	4.47181e-181
Bra020125	1.40008	5.09731	829.974	4.5518e-182	1.08304e-180
Bra021856	3.66594	2.95382	828.432	9.81025e-182	2.33289e-180
Bra014195	-1.94104	4.13838	835.708	1.16326e-181	2.7647e-180
Bra016736	-0.980681	6.0934	828.089	1.16401e-181	2.76492e-180
Bra040903	-1.00821	5.99574	828.033	1.19698e-181	2.84164e-180
Bra014050	-0.799539	6.86692	828.009	1.21109e-181	2.87352e-180
Bra024957	-0.681804	7.56056	827.694	1.41745e-181	3.36125e-180
Bra013741	-0.892079	6.44951	827.502	1.55971e-181	3.69652e-180
Bra030683	-1.1621	5.5801	826.816	2.19434e-181	5.19767e-180
Bra012006	-1.96952	4.08625	825.793	3.6533e-181	8.64861e-180
Bra027469	0.62229	8.08636	838.462	4.02229e-181	9.51678e-180
Bra005378	-0.859622	6.58576	825.097	5.16638e-181	1.22169e-179
Bra001866	0.940855	6.27091	824.795	6.00562e-181	1.41935e-179
Bra008583	-1.06802	5.818	824.554	6.77328e-181	1.59987e-179
Bra018030	-0.612021	8.11634	824.255	7.86157e-181	1.85589e-179
Bra017744	0.879023	6.53168	824.24	7.92155e-181	1.86901e-179
Bra015164	-0.867885	6.55024	824.633	8.20199e-181	1.93409e-179
Bra031989	3.17115	3.17905	824.152	8.27656e-181	1.95059e-179
Bra002138	-2.28659	3.73739	824.024	8.82033e-181	2.07758e-179
Bra000667	0.879266	6.52705	823.24	1.30309e-180	3.06764e-179
Bra017872	1.52443	4.84047	822.056	2.35116e-180	5.53184e-179
Bra033851	-0.759372	7.0599	821.812	2.65533e-180	6.24403e-179
Bra000947	-0.734042	7.20353	821.677	2.8395e-180	6.67338e-179
Bra025093	1.44889	4.9866	821.582	2.97768e-180	6.99424e-179
Bra022067	0.976023	6.13232	821.484	3.1257e-180	7.33783e-179
Bra033589	-0.460591	10.2108	820.84	4.30763e-180	1.01069e-178
Bra026303	2.48869	3.63808	820.72	4.5733e-180	1.07242e-178
Bra003263	1.3746	5.13277	820.399	5.36728e-180	1.25791e-178
Bra015023	-0.733317	7.20494	820.322	5.57801e-180	1.30657e-178
Bra000952	0.971065	6.13986	817.175	2.67448e-179	6.26114e-178
Bra024604	-0.746054	7.12185	816.985	2.94029e-179	6.87959e-178
Bra035143	-0.93722	6.23359	816.935	3.01441e-179	7.04911e-178
Bra026112	1.02441	5.95721	816.807	3.21316e-179	7.50971e-178
Bra015935	2.20404	3.89155	813.77	1.45905e-178	3.40816e-177
Bra031031	-0.864877	6.53686	812.912	2.23726e-178	5.22308e-177
Bra038235	1.98392	4.1234	812.547	2.6831e-178	6.26046e-177
Bra031968	1.16135	5.59507	812.469	2.78883e-178	6.50357e-177
Bra014448	1.55372	4.76112	810.831	6.30737e-178	1.47007e-176
Bra028485	-3.61312	2.82685	810.79	6.43891e-178	1.4999e-176
Bra009751	-1.58956	4.62067	810.711	6.69779e-178	1.55934e-176
Bra026744	-3.24918	2.99668	810.432	7.69702e-178	1.79099e-176
Bra028342	-0.848502	6.59827	809.926	9.90062e-178	2.30247e-176
Bra037606	-1.92555	4.11177	809.775	1.0674e-177	2.48095e-176
Bra025668	2.43087	3.66709	808.902	1.64941e-177	3.8316e-176
Bra024282	-0.75922	7.0267	808.835	1.70518e-177	3.95899e-176
Bra011333	0.870838	6.52839	808.441	2.07548e-177	4.81607e-176
Bra016205	1.7901	4.35327	808.31	2.21527e-177	5.13761e-176
Bra040633	0.812701	6.77674	806.882	4.5128e-177	1.04603e-175
Bra001631	-2.12003	3.88162	806.388	5.77257e-177	1.3373e-175
Bra002709	-1.12878	5.62505	806.309	6.00378e-177	1.39009e-175
Bra000376	-0.942474	6.18738	806.104	6.64742e-177	1.53828e-175
Bra024891	-3.86197	2.72208	804.518	1.4652e-176	3.38876e-175
Bra003229	-1.13414	5.6052	803.027	3.0801e-176	7.11985e-175
Bra027150	-1.22872	5.37392	802.108	4.86798e-176	1.12465e-174
Bra007213	2.83441	3.34283	801.893	5.41896e-176	1.25126e-174
Bra023359	3.04272	3.21116	801.566	6.37814e-176	1.47193e-174
Bra029946	1.20597	5.47383	800.971	8.57903e-176	1.97876e-174
Bra010475	-1.6747	4.44064	800.436	1.12008e-175	2.58206e-174
Bra001525	0.94259	6.60459	971.785	1.84038e-175	4.2402e-174
Bra032083	-1.43542	4.91318	799.192	2.0813e-175	4.79268e-174
Bra004875	-1.04655	5.8277	798.74	2.6082e-175	6.0027e-174
Bra027042	0.528344	8.95033	797.987	3.79501e-175	8.72935e-174
Bra007087	-0.586307	8.26605	797.159	5.73278e-175	1.31795e-173
Bra020758	-1.22812	5.36336	796.595	7.59177e-175	1.74437e-173
Bra007026	-1.05046	5.81092	796.388	8.41967e-175	1.93354e-173
Bra005804	-1.0405	5.83951	796.13	9.57061e-175	2.19666e-173
Bra031329	0.587071	8.27149	796.748	1.01944e-174	2.33855e-173
Bra040596	-0.936012	6.18814	795.884	1.08184e-174	2.48035e-173
Bra031532	1.25243	5.3489	794.37	2.30081e-174	5.27225e-173
Bra025083	-3.03595	3.09029	794.305	2.37716e-174	5.44423e-173
Bra032174	-1.34702	5.08448	793.591	3.39265e-174	7.76574e-173
Bra036418	2.64934	3.45778	792.969	4.62433e-174	1.05793e-172
Bra021688	0.787109	6.86608	792.931	4.71334e-174	1.07771e-172
Bra021074	-0.68853	7.40939	792.691	5.31283e-174	1.21412e-172
Bra030462	-2.71866	3.30283	792.415	6.09385e-174	1.39185e-172
Bra014755	-0.664608	7.5773	792.299	6.45821e-174	1.47427e-172
Bra031526	-0.87572	6.43218	791.816	8.21526e-174	1.87436e-172
Bra033317	-0.620606	7.92612	791.603	9.13328e-174	2.08268e-172
Bra000813	-1.73018	4.33687	791.376	1.02294e-173	2.33138e-172
Bra038906	-1.71725	4.355	790.869	1.31656e-173	2.99895e-172
Bra011216	0.722753	7.20834	790.739	1.40467e-173	3.19792e-172
Bra025811	-0.886106	6.38245	789.714	2.34186e-173	5.32868e-172
Bra019459	-1.43356	4.89577	789.421	2.70907e-173	6.16091e-172
Bra015938	2.58459	3.49883	787.87	5.86725e-173	1.3336e-171
Bra006641	-0.877772	6.41039	786.87	9.66029e-173	2.19456e-171
Bra026191	1.69461	4.45507	786.745	1.02824e-172	2.33463e-171
Bra009218	-0.895877	6.33032	786.377	1.2351e-172	2.8028e-171
Bra037920	-0.82387	6.65243	786.922	1.37659e-172	3.12218e-171
Bra022574	-1.225	5.35029	786.087	1.42677e-172	3.23427e-171
Bra015456	1.39707	5.01963	785.978	1.50673e-172	3.41368e-171
Bra021593	-0.744237	7.0441	784.244	3.57433e-172	8.09376e-171
Bra024427	-1.60635	4.53122	783.785	4.49287e-172	1.01682e-170
Bra022243	-1.37934	4.99701	783.772	4.52268e-172	1.02302e-170
Bra013764	1.51595	4.77575	783.418	5.39516e-172	1.21972e-170
Bra031515	0.918357	6.26137	782.687	7.76592e-172	1.75476e-170
Bra002290	-0.665203	7.53961	781.845	1.18126e-171	2.66769e-170
Bra023777	-1.34637	5.06249	781.012	1.78961e-171	4.03941e-170
Bra039006	2.65328	3.4319	780.85	1.93969e-171	4.37581e-170
Bra020419	-0.921319	6.21283	781.062	2.5256e-171	5.69455e-170
Bra027254	0.62377	7.87674	780.269	3.6468e-171	8.21816e-170
Bra027181	-0.779405	6.84482	779.438	3.92069e-171	8.83065e-170
Bra020569	-1.67002	4.40352	779.326	4.14634e-171	9.33391e-170
Bra024640	-1.26161	5.24924	779.272	4.25844e-171	9.58115e-170
Bra036205	-1.95008	4.02795	778.947	5.00729e-171	1.126e-169
Bra006985	-1.0666	5.73333	778.681	5.71848e-171	1.28524e-169
Bra009763	1.60681	4.59142	778.649	5.80904e-171	1.3049e-169
Bra013120	1.53648	4.72412	778.454	6.40337e-171	1.43764e-169
Bra031521	-1.85595	4.14469	778.446	6.42902e-171	1.44263e-169
Bra037409	-0.734415	7.08375	778.339	6.7796e-171	1.52049e-169
Bra006180	-2.07097	3.88259	776.745	1.50031e-170	3.36302e-169
Bra034458	1.33853	5.12133	776.647	1.57543e-170	3.52953e-169
Bra025367	3.18843	3.08179	776.272	1.89899e-170	4.25217e-169
Bra036896	-1.57671	4.57125	776.151	2.01699e-170	4.514e-169
Bra024242	0.964043	6.06931	775.959	2.21954e-170	4.96467e-169
Bra035596	1.61978	4.56164	775.625	2.62218e-170	5.86217e-169
Bra005312	-4.45752	2.49985	775.593	2.66458e-170	5.95381e-169
Bra024749	0.920797	6.23227	775.401	2.93118e-170	6.54604e-169
Bra038368	-1.1674	5.47455	775.15	3.32253e-170	7.4161e-169
Bra024283	-0.993746	5.93331	775.546	3.67138e-170	8.19042e-169
Bra021573	1.05248	5.79773	774.895	3.77186e-170	8.41014e-169
Bra038677	-1.81333	4.19398	774.878	3.80363e-170	8.47648e-169
Bra003712	-2.7993	3.21041	774.87	3.81999e-170	8.50846e-169
Bra012422	-1.37756	4.98306	774.751	4.05301e-170	9.0227e-169
Bra003782	-2.49075	3.45139	774.53	4.52448e-170	1.0067e-168
Bra016886	2.682	3.39656	773.639	7.05341e-170	1.56856e-168
Bra039742	1.06483	5.76147	773.288	8.4025e-170	1.86759e-168
Bra033225	-1.06568	5.72321	772.703	1.12451e-169	2.49808e-168
Bra026029	-0.727602	7.10447	771.765	1.79517e-169	3.98584e-168
Bra011546	-1.02247	5.84089	770.643	3.13936e-169	6.96671e-168
Bra040010	1.35735	5.06912	770.195	3.92429e-169	8.704e-168
Bra009944	-1.99832	3.95339	770.137	4.04027e-169	8.95654e-168
Bra030419	0.912831	6.24972	769.29	6.16329e-169	1.36557e-167
Bra019442	-2.16185	3.76495	769.24	6.31666e-169	1.39882e-167
Bra039927	-2.3536	3.56707	768.942	7.33048e-169	1.62247e-167
Bra040592	0.682373	7.39987	768.818	7.79483e-169	1.72435e-167
Bra022048	1.05491	5.77623	767.307	1.65591e-168	3.66122e-167
Bra029311	3.02155	3.15908	767.047	1.88479e-168	4.1651e-167
Bra011081	-0.490506	9.3416	766.338	2.68308e-168	5.92609e-167
Bra034697	1.64214	4.50183	765.989	3.19244e-168	7.04743e-167
Bra039659	-1.49436	4.71252	765.37	4.34817e-168	9.59372e-167
Bra004996	-1.45157	4.8055	766.028	4.36266e-168	9.62066e-167
Bra040696	-1.20216	5.36392	765.299	4.50362e-168	9.92631e-167
Bra016044	1.2512	5.29364	765.491	5.8667e-168	1.29239e-166
Bra027363	-2.50637	3.41794	763.969	8.74092e-168	1.92455e-166
Bra035994	-2.29122	3.61469	761.83	2.53742e-167	5.58391e-166
Bra025995	1.75144	4.32029	761.317	3.27743e-167	7.20864e-166
Bra035848	-0.67658	7.39471	760.85	4.1359e-167	9.09209e-166
Bra038700	-1.30061	5.12101	760.742	4.36484e-167	9.59036e-166
Bra009382	1.15673	5.50886	760.538	4.83167e-167	1.06106e-165
Bra013852	3.30465	2.99066	760.42	5.1247e-167	1.12482e-165
Bra022751	0.424272	10.6697	759.674	7.43355e-167	1.63074e-165
Bra031248	-1.6681	4.36562	757.894	1.80491e-166	3.95748e-165
Bra009244	-0.515808	8.92401	757.88	1.81732e-166	3.98262e-165
Bra006700	1.65992	4.44959	756.982	2.84306e-166	6.22727e-165
Bra032984	-0.64178	7.64218	758.961	2.85055e-166	6.24044e-165
Bra009771	0.767206	6.87118	756.847	3.04178e-166	6.65344e-165
Bra012532	4.68616	2.53706	756.846	3.04236e-166	6.65344e-165
Bra021603	-1.41692	4.85864	756.484	3.64457e-166	7.96632e-165
Bra037098	1.54862	4.65157	755.847	5.00624e-166	1.0937e-164
Bra003864	-1.10668	5.58333	755.553	5.79647e-166	1.26568e-164
Bra006717	1.97294	4.03266	755.236	6.78724e-166	1.48125e-164
Bra002668	-0.88213	6.30821	754.843	8.25689e-166	1.80106e-164
Bra037651	0.844219	6.50749	753.936	1.29779e-165	2.82939e-164
Bra015897	-1.07762	5.67212	762.929	1.30104e-165	2.835e-164
Bra023324	-0.893671	6.25573	753.889	1.32877e-165	2.89394e-164
Bra037358	2.59302	3.4232	752.201	3.08085e-165	6.70633e-164
Bra001891	-1.15495	5.4598	753.391	3.18597e-165	6.93158e-164
Bra018288	-0.48031	9.42541	750.575	6.93184e-165	1.50735e-163
Bra014527	-3.58703	2.7326	750.411	7.52044e-165	1.6345e-163
Bra036739	-1.01101	5.832	750.309	7.91137e-165	1.71858e-163
Bra024496	1.35362	5.03262	749.006	1.51482e-164	3.28894e-163
Bra037191	-1.25884	5.18849	747.314	3.52069e-164	7.64011e-163
Bra039198	-1.05863	5.69134	746.468	5.3685e-164	1.1644e-162
Bra007282	-0.681623	7.3159	746.856	6.46151e-164	1.40075e-162
Bra029677	-1.29916	5.09197	745.83	7.37855e-164	1.59872e-162
Bra001900	-1.04792	5.71845	745.446	8.93512e-164	1.93499e-162
Bra011857	-1.23415	5.24115	744.542	1.40233e-163	3.03534e-162
Bra016223	-0.846903	6.43899	744.461	1.45967e-163	3.15782e-162
Bra030785	-0.828937	6.52371	744.306	1.57675e-163	3.40937e-162
Bra000757	-0.587487	8.05503	744.181	1.67852e-163	3.62756e-162
Bra014233	-1.38378	4.90211	743.357	2.53082e-163	5.46673e-162
Bra040427	-0.631331	7.67166	743.295	2.61037e-163	5.63567e-162
Bra040974	1.44355	4.83324	743.25	2.66925e-163	5.75984e-162
Bra028952	-0.80376	6.6345	742.606	3.6808e-163	7.93856e-162
Bra002566	-1.02573	5.77314	742.258	4.37669e-163	9.43459e-162
Bra038649	-1.05183	5.69889	741.959	5.08212e-163	1.09497e-161
Bra003083	2.41347	3.55416	741.562	6.19271e-163	1.33357e-161
Bra037771	-0.886783	6.25379	741.382	6.77414e-163	1.45803e-161
Bra040785	-1.01568	5.79958	740.827	8.93432e-163	1.92199e-161
Bra012364	1.03724	5.77041	740.035	1.32549e-162	2.85002e-161
Bra023741	-3.05372	2.97638	740.02	1.3357e-162	2.87049e-161
Bra038962	2.57297	3.41319	738.775	2.48494e-162	5.33756e-161
Bra004660	1.9293	4.05103	738.481	2.87604e-162	6.17448e-161
Bra029188	-0.587636	8.02992	737.899	3.8441e-162	8.24858e-161
Bra026058	3.02839	3.09585	736.885	6.37323e-162	1.36686e-160
Bra015380	0.678893	7.32409	736.647	7.17843e-162	1.53877e-160
Bra004954	-1.08354	5.60492	736.545	7.54956e-162	1.6175e-160
Bra018707	-3.64143	2.68383	736.414	8.06107e-162	1.72621e-160
Bra034873	-0.787732	6.69229	736.223	8.86561e-162	1.89754e-160
Bra000159	-0.769868	6.77897	736.157	9.16249e-162	1.96009e-160
Bra005669	1.7674	4.25075	736.055	9.64022e-162	2.06124e-160
Bra013113	-4.65131	2.38847	736.034	9.73998e-162	2.08151e-160
Bra019645	-1.63276	4.37635	735.968	1.72938e-161	3.69397e-160
Bra001247	-2.03126	3.84783	734.881	1.7311e-161	3.69577e-160
Bra028662	-1.42475	4.79072	734.845	1.76227e-161	3.76039e-160
Bra024446	1.27572	5.16941	734.208	2.42131e-161	5.16407e-160
Bra016729	-0.541815	8.49246	734.134	2.51153e-161	5.35378e-160
Bra040119	-0.633951	7.61954	734.128	2.51896e-161	5.36692e-160
Bra001034	1.05221	5.71736	733.421	3.58377e-161	7.63176e-160
Bra034562	-1.04497	5.70068	732.756	4.99242e-161	1.06261e-159
Bra017508	-1.36785	4.91297	732.26	6.39242e-161	1.35991e-159
Bra003001	1.3055	5.09844	731.974	7.37449e-161	1.56805e-159
Bra009696	0.912314	6.15761	731.996	9.20258e-161	1.95577e-159
Bra030916	3.3884	2.89585	731.029	1.18096e-160	2.50855e-159
Bra035926	-1.25052	5.16999	729.447	2.59871e-160	5.51732e-159
Bra012319	-1.39758	4.8382	729.197	2.94386e-160	6.24697e-159
Bra023670	-1.12496	5.48515	728.857	3.48802e-160	7.39796e-159
Bra021634	-0.748339	6.86742	727.377	7.2938e-160	1.54621e-158
Bra003402	1.01522	5.80591	727.306	7.55673e-160	1.60115e-158
Bra034197	-0.978401	5.87993	726.566	1.09253e-159	2.31372e-158
Bra032118	0.544286	8.44181	725.879	1.53926e-159	3.25709e-158
Bra020293	1.07189	5.64903	725.878	1.53952e-159	3.25709e-158
Bra027196	-0.715719	7.04316	725.714	1.67107e-159	3.53362e-158
Bra020167	-1.48058	4.651	726.204	1.69766e-159	3.58805e-158
Bra033861	-0.599604	7.87153	724.932	2.46821e-159	5.21401e-158
Bra023353	-1.32507	4.98985	724.239	3.48664e-159	7.36173e-158
Bra014879	1.88328	4.07938	724.103	3.73021e-159	7.87207e-158
[truncated: 40,187 more rows]

## Sheet: adjp less than 0.05
Bra027987
Bra035742
Bra015548
Bra032590
Bra017656
Bra034624
Bra028290
Bra011529
Bra003696
Bra015873
Bra006086
Bra033648
Bra001264
Bra007887
Bra012784
Bra032901
Bra013026
Bra021965
Bra028291
Bra020709
Bra030910
Bra022981
Bra025297
Bra027602
Bra018065
Bra007334
Bra000093
Bra025728
Bra030156
Bra025730
Bra004994
Bra001122
Bra004503
Bra022668
Bra000903
Bra027465
Bra029040
Bra024126
Bra006796
Bra003588
Bra007195
Bra028980
Bra040169
Bra000382
Bra013630
Bra030167
Bra026606
Bra015922
Bra003713
Bra033324
Bra032293
Bra007885
Bra016233
Bra024539
Bra000876
Bra009250
Bra005071
Bra029990
Bra009294
Bra006567
Bra031255
Bra039099
Bra023676
Bra017301
Bra002719
Bra029278
Bra016254
Bra001752
Bra011636
Bra004819
Bra021110
Bra013059
Bra024662
Bra013019
Bra010096
Bra025325
Bra011292
Bra012910
Bra002718
Bra030507
Bra027651
Bra003273
Bra031074
Bra007315
Bra025951
Bra034140
Bra008435
Bra004771
Bra010035
Bra012479
Bra016495
Bra011135
Bra016191
Bra002283
Bra031470
Bra003969
Bra000158
Bra004633
Bra002189
Bra005079
Bra002355
Bra000311
Bra039070
Bra037499
Bra015986
Bra000670
Bra022935
Bra038832
Bra020820
Bra038242
Bra011181
Bra003670
Bra000310
Bra033809
Bra040020
Bra004330
Bra008025
Bra022772
Bra008668
Bra021861
Bra017342
Bra005572
Bra001907
Bra020140
Bra031048
Bra012088
Bra027981
Bra000775
Bra005447
Bra036774
Bra018703
Bra025736
Bra022436
Bra017112
Bra039974
Bra020011
Bra024717
Bra001067
Bra007039
Bra028091
Bra012058
Bra030917
Bra035641
Bra014396
Bra017040
Bra005125
Bra030589
Bra032591
Bra035148
Bra007444
Bra007696
Bra025547
Bra039217
Bra000660
Bra038538
Bra000140
Bra024851
Bra035833
Bra031065
Bra034666
Bra031690
Bra010076
Bra017839
Bra033022
Bra004718
Bra017628
Bra007798
Bra013123
Bra007205
Bra040374
Bra032665
Bra037247
Bra033436
Bra013426
Bra032288
Bra025756
Bra029145
Bra000508
Bra007446
Bra020862
Bra037741
Bra006085
Bra022723
Bra029505
Bra029031
Bra022905
Bra012334
Bra025917
Bra006809
Bra021614
Bra039434
Bra040158
Bra018409
Bra027044
Bra032371
Bra014598
Bra007603
Bra000635
Bra005891
Bra015133
Bra019644
Bra002999
Bra010099
Bra018383
Bra006851
Bra031080
Bra008438
Bra032622
Bra031210
Bra027047
Bra008267
Bra011830
Bra012149
Bra026991
Bra017093
Bra018477
Bra007099
Bra016593
Bra001422
Bra037739
Bra019599
Bra021636
Bra006727
Bra039038
Bra037112
Bra038219
Bra013476
Bra026495
Bra037477
Bra025409
Bra035236
Bra002316
Bra017464
Bra025141
Bra006403
Bra000315
Bra003194
Bra026084
Bra004841
Bra003363
Bra000875
Bra022805
Bra016561
Bra021569
Bra027519
Bra013815
Bra010015
Bra001155
Bra014427
Bra013183
Bra006833
Bra022594
Bra021259
Bra000811
Bra008667
Bra039012
Bra008037
Bra034818
Bra038521
Bra018750
Bra007864
Bra011180
Bra009184
Bra029259
Bra031401
Bra024953
Bra027838
Bra032309
Bra009302
Bra009221
Bra021208
Bra026804
Bra007202
Bra038785
Bra019686
Bra037578
Bra033938
Bra009735
Bra028635
Bra027920
Bra019357
Bra015048
Bra034592
Bra015727
Bra006694
Bra038734
Bra003780
Bra023434
Bra016164
Bra006709
Bra025439
Bra029641
Bra028419
Bra040610
Bra029666
Bra031195
Bra038360
Bra032747
Bra025683
Bra015307
Bra037113
Bra005424
Bra020188
Bra008101
Bra015346
Bra002049
Bra013714
Bra014297
Bra026466
Bra024318
Bra010055
Bra017278
Bra003212
Bra034321
Bra037542
Bra037386
Bra032734
Bra013579
Bra022191
Bra037471
Bra003187
Bra028533
Bra008806
Bra012972
Bra000571
Bra019718
Bra030674
Bra006949
Bra017980
Bra036022
Bra016250
Bra040373
Bra036048
Bra010922
Bra034466
Bra013009
Bra014426
Bra012964
Bra019406
Bra011573
Bra020827
Bra040061
Bra017390
Bra037115
Bra013566
Bra034163
Bra031554
Bra002400
Bra009013
Bra032356
Bra001774
Bra022815
Bra026156
Bra018183
Bra030182
Bra030253
Bra017148
Bra014636
Bra031387
Bra011749
Bra014550
Bra004477
Bra029712
Bra033092
Bra020433
Bra006691
Bra016914
Bra037954
Bra027664
Bra007162
Bra010627
Bra019002
Bra026364
Bra033239
Bra005425
Bra013034
Bra024087
Bra003375
Bra026653
Bra024611
Bra027431
Bra003306
Bra035897
Bra038517
Bra020313
Bra002322
Bra021831
Bra035415
Bra015053
Bra035505
Bra020179
Bra015915
Bra025400
Bra001457
Bra036278
Bra006598
Bra023103
Bra010880
Bra018344
Bra018216
Bra010879
Bra034845
Bra037647
Bra002559
Bra016126
Bra036269
Bra001905
Bra025280
Bra013985
Bra009876
Bra011339
Bra008695
Bra033198
Bra015912
Bra031656
Bra035002
Bra035384
Bra022161
Bra023998
Bra021101
Bra023006
Bra002984
Bra023126
Bra020800
Bra016237
Bra035067
Bra037368
Bra038205
Bra010819
Bra023044
Bra039021
Bra007328
Bra017722
Bra036864
Bra015025
Bra018907
Bra012779
Bra026237
Bra021175
Bra035365
Bra000056
Bra035933
Bra025924
Bra039058
Bra027243
Bra017920
Bra030284
Bra002564
Bra009037
Bra038281
Bra014848
Bra005984
Bra025207
Bra037137
Bra005641
Bra029093
Bra003975
Bra006975
Bra001789
Bra009774
Bra036862
Bra032345
Bra032902
Bra003115
Bra029642
Bra026797
Bra014977
Bra009062
Bra020123
Bra021480
Bra001639
Bra034648
Bra032951
Bra028554
Bra023398
Bra026230
Bra007906
Bra013678
Bra028996
Bra018346
Bra017516
Bra017005
Bra010917
Bra009393
Bra025664
Bra027083
Bra010706
Bra011656
Bra013660
Bra037181
Bra032845
Bra025713
Bra001320
Bra018469
Bra028379
Bra016060
Bra015908
Bra014674
Bra033077
Bra035732
Bra007888
Bra036948
Bra021912
Bra032485
Bra014665
Bra022437
Bra024879
Bra031349
Bra027569
Bra018492
Bra001086
Bra012676
Bra019295
Bra035320
Bra022976
Bra029301
Bra018964
Bra039945
Bra031927
Bra031029
Bra003680
Bra038612
Bra016683
Bra011282
Bra030669
Bra034164
Bra001921
Bra002944
Bra015570
Bra031127
Bra033813
Bra015531
Bra010807
Bra040924
Bra005527
Bra025832
Bra011316
Bra016789
Bra013794
Bra029309
Bra004689
Bra006997
Bra010453
Bra014671
Bra019584
Bra006795
Bra016252
Bra001635
Bra034941
Bra016860
Bra025371
Bra001488
Bra017085
Bra032795
Bra011554
Bra025450
Bra034817
Bra024750
Bra000708
Bra004137
Bra038111
Bra011650
Bra007841
Bra017524
Bra014838
Bra024339
Bra016216
Bra037811
Bra011174
Bra029848
Bra001653
Bra026944
Bra026099
Bra017462
Bra004534
Bra030095
Bra028523
Bra038227
Bra033070
Bra017823
Bra012008
Bra016746
Bra027306
Bra039059
Bra028910
Bra031763
Bra025961
Bra000365
Bra004136
Bra011500
Bra028126
Bra014401
Bra034295
Bra003526
Bra023294
Bra023940
Bra040213
Bra037254
Bra030303
Bra024075
Bra020705
Bra006273
Bra017236
Bra018969
Bra031898
Bra015306
Bra024562
Bra040103
Bra006015
Bra025081
Bra024642
Bra037520
Bra021063
Bra036528
Bra012788
Bra025654
Bra008406
Bra029587
Bra007679
Bra002214
Bra020828
Bra017741
Bra021758
Bra032343
Bra007109
Bra005670
Bra035599
Bra028446
Bra011821
Bra012571
Bra016053
Bra019382
Bra031055
Bra002528
Bra036467
Bra037157
Bra038811
Bra036577
Bra035593
Bra025883
Bra020472
Bra024280
Bra024095
Bra009953
Bra011299
Bra010482
Bra036599
Bra019052
Bra013674
Bra029732
Bra017350
Bra036540
Bra035447
Bra028165
Bra034060
Bra005019
Bra013537
Bra016187
Bra024812
Bra033528
Bra007284
Bra025323
Bra026745
Bra020203
Bra012359
Bra010424
Bra012324
Bra020538
Bra001626
Bra018113
Bra027509
Bra017743
Bra034103
Bra012938
Bra018941
Bra008513
Bra019354
Bra011701
Bra040651
Bra033169
Bra008699
Bra025060
Bra032085
Bra027228
Bra027877
Bra018144
Bra020715
Bra023102
Bra035103
Bra011522
Bra004467
Bra000391
Bra007912
Bra027377
Bra035023
Bra038674
Bra032522
Bra027358
Bra028784
Bra038548
Bra031749
Bra014908
Bra024332
Bra017210
Bra014542
Bra034623
Bra018168
Bra015335
Bra011020
Bra006850
Bra029584
Bra007513
Bra026314
Bra016650
Bra013224
Bra020368
Bra016330
Bra011877
Bra000643
Bra011808
Bra003938
Bra012764
Bra018085
Bra007279
Bra036882
Bra029230
Bra003287
Bra025406
Bra016934
Bra036490
Bra013091
Bra039271
Bra006879
Bra035929
Bra040573
Bra012127
Bra013732
Bra000214
Bra010263
Bra000064
Bra028006
Bra037798
Bra009420
Bra007070
Bra015639
Bra006239
Bra002191
Bra023965
Bra016889
Bra033199
Bra033104
Bra029001
Bra006416
Bra004192
Bra014308
Bra038614
Bra003950
Bra021673
Bra013382
Bra026795
Bra021241
Bra021179
Bra007380
Bra028660
Bra006208
Bra001507
Bra015811
Bra020523
Bra019193
Bra004543
Bra024934
Bra009002
Bra026349
Bra036184
Bra001289
Bra009872
Bra018190
Bra006556
Bra005356
Bra020425
Bra039669
Bra031624
Bra039280
Bra020549
Bra016589
Bra036512
Bra032945
Bra024699
Bra018370
Bra003256
Bra016328
Bra028906
Bra040582
Bra033495
Bra027504
Bra031649
Bra005405
Bra024261
Bra039061
Bra018543
Bra038384
Bra039661
Bra034546
Bra008055
Bra013904
Bra032384
Bra025082
Bra035992
Bra025819
Bra003659
Bra010075
Bra032711
Bra013173
Bra037913
Bra001046
Bra020113
Bra037761
Bra000321
Bra021548
Bra008033
Bra027294
Bra012850
Bra036845
Bra017960
Bra030385
Bra008242
Bra009609
Bra026409
Bra010572
Bra022585
Bra011057
Bra001500
Bra039452
Bra000544
Bra016840
Bra008683
Bra015779
Bra037555
Bra017435
Bra007333
Bra019049
Bra036344
Bra025838
Bra038011
Bra008191
Bra035942
Bra001934
Bra034863
Bra013582
Bra009967
Bra023844
Bra020724
Bra001291
Bra027325
Bra034783
Bra027940
Bra035179
Bra021909
Bra031427
Bra020599
Bra037490
Bra004158
Bra009476
Bra019518
Bra038081
Bra034739
Bra031534
Bra013352
Bra013931
Bra019867
Bra023967
Bra000227
Bra011194
Bra002703
Bra039844
Bra006235
Bra019474
Bra002374
Bra011002
Bra004075
Bra011514
Bra022245
Bra040482
Bra018995
Bra013859
Bra006036
Bra029519
Bra018039
Bra016564
Bra034383
Bra034911
Bra028219
Bra000474
Bra016284
Bra011179
Bra000938
Bra021171
Bra015924
Bra000734
Bra019742
Bra000144
Bra026192
Bra027204
Bra010189
Bra033753
Bra019689
Bra021163
Bra018940
Bra039597
Bra024580
Bra034822
Bra013314
Bra018096
Bra017940
Bra031471
Bra029481
Bra020388
Bra033412
Bra025812
Bra000460
Bra018423
Bra013786
Bra000737
Bra003840
Bra010693
Bra033545
Bra040699
Bra010350
Bra011345
Bra003198
Bra031813
Bra015501
Bra018629
Bra040764
Bra010774
Bra010018
Bra012230
Bra021759
Bra003226
Bra028409
Bra003564
Bra024345
Bra036240
Bra033802
Bra009805
Bra004950
Bra038377
Bra000663
Bra028411
Bra007604
Bra018309
Bra037164
Bra000884
Bra010820
Bra014433
Bra023176
Bra003527
Bra038418
Bra016224
Bra027109
Bra037389
Bra015520
Bra017165
Bra039925
Bra015790
Bra023598
Bra011319
Bra012083
Bra023336
Bra030367
Bra024848
Bra025989
Bra001676
Bra026009
Bra003451
Bra004252
Bra008152
Bra038863
Bra027485
Bra024964
Bra016989
Bra014131
Bra033029
Bra015656
Bra036518
Bra021506
Bra008993
Bra012376
Bra001809
Bra001950
Bra016855
Bra010717
Bra027506
Bra018955
Bra021649
Bra019797
Bra018700
Bra031167
Bra022019
Bra030660
Bra001249
Bra033982
Bra037104
Bra032672
Bra029765
Bra003624
Bra011605
Bra010727
Bra028924
Bra027188
Bra037609
Bra011985
Bra010384
Bra029563
Bra013148
Bra013013
Bra018006
Bra011919
Bra005522
Bra035087
Bra011884
Bra000687
Bra028174
Bra030843
Bra037196
Bra018305
Bra008392
Bra017055
Bra011329
Bra034927
Bra011405
Bra035392
Bra028181
Bra013205
Bra029258
Bra021417
Bra024886
Bra040448
Bra035446
Bra005709
Bra030238
Bra037630
Bra017341
Bra031061
Bra018987
Bra033718
Bra009229
Bra019246
Bra028768
Bra003053
Bra034675
Bra011616
Bra000480
Bra021067
Bra004855
Bra010307
Bra038032
Bra024659
Bra008808
Bra019875
Bra018860
Bra032511
Bra001359
Bra027284
Bra028948
Bra040893
Bra026425
Bra007234
Bra010231
Bra024068
Bra005134
Bra011771
Bra021734
Bra033998
Bra038958
Bra026864
Bra014247
Bra039342
Bra039091
Bra034346
Bra040916
Bra015038
Bra006401
Bra017296
Bra005168
Bra007699
Bra003833
Bra032034
Bra019231
Bra008856
Bra003906
Bra010795
Bra015880
Bra007507
Bra015415
Bra026580
Bra019035
Bra031456
Bra015826
Bra037201
Bra036140
Bra015665
Bra006137
Bra000165
Bra026937
Bra009181
Bra029545
Bra033958
Bra037280
Bra001415
Bra013450
Bra011383
Bra026595
Bra001587
Bra000778
Bra031693
Bra003190
Bra009203
Bra012274
Bra034725
Bra006511
Bra004165
Bra016238
Bra011537
Bra027688
Bra012371
Bra026631
Bra027080
Bra012157
Bra019210
Bra015815
Bra003850
Bra009053
Bra016382
Bra030157
Bra004101
Bra037364
Bra016522
Bra024038
Bra021879
Bra009334
Bra036315
Bra012471
Bra034611
Bra017125
Bra005668
Bra011154
Bra001923
Bra001815
Bra036950
Bra019615
Bra036972
Bra025304
Bra015419
Bra027347
Bra011208
Bra021157
Bra035469
Bra039995
Bra004532
Bra023161
Bra007271
Bra031371
Bra029414
Bra004322
Bra030858
Bra010396
Bra008036
Bra033832
Bra010483
Bra008947
Bra027203
Bra000285
Bra002375
Bra033428
Bra024117
Bra018372
Bra034704
Bra034237
Bra024324
Bra006004
Bra011590
Bra030248
Bra009565
Bra020821
Bra022115
Bra014024
Bra010419
Bra003981
Bra028520
Bra001175
Bra018184
Bra000953
Bra015530
Bra006692
Bra010751
Bra025431
Bra021385
Bra021807
Bra003560
Bra015788
Bra005053
Bra030496
Bra015882
Bra028271
Bra037302
Bra009491
Bra025520
Bra035244
Bra024205
Bra018619
Bra029880
Bra017355
Bra003858
Bra019376
Bra000441
Bra011923
Bra019448
Bra018204
Bra031069
Bra021132
Bra004423
Bra030262
Bra036763
Bra030083
Bra011536
Bra007655
Bra005687
Bra019866
Bra002423
Bra006784
Bra033350
Bra007055
Bra003389
Bra006304
Bra006790
Bra027049
Bra018933
Bra004244
Bra013523
Bra035190
Bra033925
Bra027618
Bra002326
Bra004022
Bra026672
Bra028187
Bra022369
Bra020197
Bra017975
Bra040762
Bra027736
Bra021501
Bra008510
Bra029516
Bra021754
Bra000806
Bra022254
Bra011686
Bra018806
Bra004261
Bra027654
Bra017272
Bra018942
Bra010796
Bra005215
Bra009882
Bra035787
Bra011328
Bra022034
Bra035006
Bra011918
Bra002582
Bra028988
Bra021530
Bra004045
Bra022531
Bra014860
Bra027941
Bra030231
Bra021605
Bra014666
Bra032894
Bra016763
Bra024367
Bra020592
Bra029476
Bra014221
Bra014327
Bra026353
Bra021982
Bra027323
Bra009663
Bra040998
Bra026170
Bra004267
Bra000940
Bra002596
Bra007203
Bra027476
Bra027273
Bra015574
Bra036327
Bra019179
Bra019320
Bra036353
Bra000647
Bra009364
Bra034212
Bra010785
Bra016520
Bra001747
Bra037607
Bra016672
Bra013517
Bra013832
Bra024532
Bra028666
Bra024181
Bra004522
Bra007225
Bra028944
Bra021558
Bra024638
Bra023711
Bra012845
Bra022553
Bra012469
Bra009090
Bra013018
Bra033291
Bra002914
Bra037701
Bra024032
Bra032619
Bra007434
Bra008430
Bra017035
Bra006088
Bra037453
Bra028935
Bra015696
Bra002221
Bra008426
Bra002665
Bra036846
Bra034404
Bra027089
Bra000754
Bra012922
Bra009783
Bra030986
Bra040157
Bra032370
Bra007983
Bra012747
Bra024335
Bra000985
Bra026417
Bra024660
Bra006341
Bra001490
Bra026489
Bra036701
Bra006963
Bra008998
Bra019178
Bra008271
Bra024809
Bra015607
Bra006966
Bra000889
Bra010852
Bra006118
Bra035917
Bra018040
Bra036303
Bra011511
Bra016945
Bra011715
Bra022502
Bra009595
Bra034424
Bra027662
Bra018850
Bra009608
Bra011460
Bra011526
Bra004721
Bra003835
Bra036573
Bra020051
Bra011783
Bra034088
Bra037529
Bra000937
Bra010441
Bra036193
Bra021408
Bra006288
Bra010980
Bra001683
Bra001003
Bra016415
Bra010643
Bra032988
Bra029549
Bra037207
Bra037682
Bra025481
Bra028912
Bra015174
Bra018714
Bra024588
Bra033482
Bra000011
Bra028406
Bra022315
Bra034674
Bra016642
Bra002839
Bra029319
Bra012282
Bra029842
Bra008849
Bra015668
Bra011053
Bra024284
Bra037470
Bra000583
Bra013653
Bra025340
Bra036060
Bra002973
Bra000837
Bra007819
Bra009987
Bra037955
Bra015719
Bra025579
Bra022266
Bra003448
Bra018988
Bra012720
Bra037493
Bra019860
Bra026642
Bra038411
Bra010984
Bra009459
Bra027659
Bra030316
Bra017710
Bra013209
Bra018122
Bra023172
Bra015547
Bra014663
Bra017317
Bra029971
Bra017502
Bra024902
Bra029069
Bra004479
Bra031630
Bra000282
Bra010775
Bra015274
Bra014417
Bra032166
Bra027800
Bra024900
Bra007110
Bra024415
Bra034561
Bra023995
Bra009794
Bra004630
Bra011916
Bra005175
Bra023560
Bra030498
Bra016381
Bra029936
Bra005310
Bra033415
Bra036492
Bra009620
Bra007210
Bra017498
Bra034242
Bra015052
Bra015731
Bra028477
Bra026948
Bra013423
Bra018953
Bra005980
Bra032849
Bra041077
Bra007572
Bra020052
Bra017563
Bra022242
Bra033570
Bra004290
Bra026273
Bra010528
Bra015878
Bra010102
Bra026157
Bra000699
Bra017473
Bra013684
Bra029393
Bra036447
Bra003916
Bra034620
Bra036797
Bra021222
Bra014981
Bra018448
Bra025735
Bra028645
Bra002031
Bra033046
Bra036281
Bra032316
Bra007761
Bra030759
Bra021187
Bra017633
Bra012746
Bra037362
Bra016604
Bra021735
Bra008255
Bra035875
Bra018000
Bra006736
Bra034848
Bra022734
Bra004029
Bra006908
Bra021042
Bra002671
Bra023450
Bra039301
Bra025710
Bra023510
Bra018294
Bra020409
Bra027355
Bra029355
Bra038621
Bra011411
Bra017277
Bra022186
Bra029638
Bra027962
Bra015863
Bra031924
Bra032750
Bra016765
Bra016261
Bra002371
Bra024273
Bra004389
Bra006553
Bra010084
Bra031708
Bra034413
Bra021327
Bra022219
Bra025660
Bra011687
Bra027540
Bra019932
Bra023235
Bra025534
Bra006572
Bra026461
Bra005964
Bra008032
Bra019672
Bra009543
Bra016230
Bra024020
Bra015514
Bra038835
Bra033431
Bra037382
Bra025696
Bra009499
Bra020154
Bra013872
Bra018873
Bra018693
Bra030159
Bra015850
Bra021653
Bra002669
Bra028893
Bra034141
Bra022587
Bra013828
Bra016607
Bra017764
Bra029869
Bra011109
Bra034762
Bra024634
Bra036542
Bra003970
Bra039748
Bra041056
Bra020124
Bra000854
Bra035561
Bra019324
Bra000534
Bra031790
Bra023045
Bra036724
Bra010954
Bra037639
Bra011757
Bra014842
Bra015881
Bra027317
Bra027967
Bra015348
Bra035881
Bra032137
Bra016262
Bra031762
Bra000557
Bra016470
Bra003200
Bra013632
Bra007041
Bra022827
Bra029761
Bra037462
Bra021740
Bra006248
Bra003774
Bra002450
Bra001140
Bra026133
Bra007862
Bra015961
Bra039115
Bra001451
Bra039460
Bra005854
Bra028729
Bra030911
Bra031247
Bra037877
Bra035054
Bra009293
Bra010713
Bra025914
Bra006372
Bra039937
Bra002537
Bra022794
Bra040161
Bra032613
Bra033549
Bra035429
Bra016644
Bra025212
Bra038688
Bra039116
Bra028510
Bra013077
Bra029730
Bra000256
Bra025305
Bra034851
Bra030934
Bra032697
Bra017503
Bra038904
Bra033441
Bra006603
Bra014435
Bra012865
Bra030070
Bra014354
Bra034128
Bra034193
Bra012595
Bra038967
Bra019693
Bra032150
Bra012925
Bra025003
Bra041073
Bra012269
Bra026565
Bra005933
Bra016270
Bra035549
Bra024187
Bra008157
Bra002411
Bra025740
Bra014461
Bra019777
Bra034007
Bra007177
Bra018864
Bra025760
Bra004320
Bra027359
Bra004940
Bra039557
Bra026936
Bra039227
Bra035477
Bra020125
Bra021856
Bra014195
Bra016736
Bra040903
Bra014050
Bra024957
Bra013741
Bra030683
Bra012006
Bra027469
Bra005378
Bra001866
Bra008583
Bra018030
Bra017744
Bra015164
Bra031989
Bra002138
Bra000667
Bra017872
Bra033851
Bra000947
Bra025093
Bra022067
Bra033589
Bra026303
Bra003263
Bra015023
Bra000952
Bra024604
Bra035143
Bra026112
Bra015935
Bra031031
Bra038235
Bra031968
Bra014448
Bra028485
Bra009751
Bra026744
Bra028342
Bra037606
Bra025668
Bra024282
Bra011333
Bra016205
Bra040633
Bra001631
Bra002709
Bra000376
Bra024891
Bra003229
Bra027150
Bra007213
Bra023359
Bra029946
Bra010475
Bra001525
Bra032083
Bra004875
Bra027042
Bra007087
Bra020758
Bra007026
Bra005804
Bra031329
Bra040596
Bra031532
Bra025083
Bra032174
Bra036418
Bra021688
Bra021074
Bra030462
Bra014755
Bra031526
Bra033317
Bra000813
Bra038906
Bra011216
Bra025811
Bra019459
Bra015938
Bra006641
Bra026191
Bra009218
Bra037920
Bra022574
Bra015456
Bra021593
Bra024427
Bra022243
Bra013764
Bra031515
Bra002290
Bra023777
Bra039006
Bra020419
Bra027254
Bra027181
Bra020569
Bra024640
Bra036205
Bra006985
Bra009763
Bra013120
Bra031521
Bra037409
Bra006180
Bra034458
Bra025367
Bra036896
Bra024242
Bra035596
Bra005312
Bra024749
Bra038368
Bra024283
Bra021573
Bra038677
Bra003712
Bra012422
Bra003782
Bra016886
Bra039742
Bra033225
Bra026029
Bra011546
Bra040010
Bra009944
Bra030419
Bra019442
Bra039927
Bra040592
Bra022048
Bra029311
Bra011081
Bra034697
Bra039659
Bra004996
Bra040696
Bra016044
Bra027363
Bra035994
Bra025995
Bra035848
Bra038700
Bra009382
Bra013852
Bra022751
Bra031248
Bra009244
Bra006700
Bra032984
Bra009771
Bra012532
Bra021603
Bra037098
Bra003864
Bra006717
Bra002668
Bra037651
Bra015897
Bra023324
Bra037358
Bra001891
Bra018288
Bra014527
Bra036739
Bra024496
Bra037191
Bra039198
Bra007282
Bra029677
Bra001900
Bra011857
Bra016223
Bra030785
Bra000757
Bra014233
Bra040427
Bra040974
Bra028952
Bra002566
Bra038649
Bra003083
Bra037771
Bra040785
Bra012364
Bra023741
Bra038962
Bra004660
Bra029188
Bra026058
Bra015380
Bra004954
Bra018707
Bra034873
Bra000159
Bra005669
Bra013113
Bra019645
Bra001247
Bra028662
Bra024446
Bra016729
Bra040119
Bra001034
Bra034562
Bra017508
Bra003001
Bra009696
Bra030916
Bra035926
Bra012319
Bra023670
Bra021634
Bra003402
Bra034197
Bra032118
Bra020293
Bra027196
Bra020167
Bra033861
Bra023353
Bra014879
Bra019637
Bra030155
Bra020096
Bra002512
Bra025235
Bra017452
Bra014316
Bra004449
Bra027192
Bra019307
Bra023485
Bra000659
Bra005282
Bra019206
Bra010259
Bra002045
Bra037139
Bra000657
Bra029099
Bra018954
Bra002103
Bra029715
Bra005818
Bra016805
Bra023360
Bra011706
Bra020045
Bra016818
Bra013909
Bra011221
Bra009379
Bra009461
Bra019118
Bra037380
Bra029242
Bra016494
Bra036311
Bra029435
Bra021032
Bra025350
Bra009397
Bra033773
Bra024300
Bra011130
Bra013777
Bra034847
Bra038939
Bra013475
Bra003743
Bra037880
[truncated: 18,723 more rows]

## Sheet: DESeq2
					p value	adj p vlaue
Bra036240	54472.7	-1.06808	0.0129886	-82.2321	0	0
Bra036269	7204.1	-2.45947	0.0273467	-89.9364	0	0
Bra036278	3293.95	-2.50757	0.0383957	-65.3086	0	0
Bra037389	6988.79	-1.01509	0.0239076	-42.4588	0	0
Bra039099	1660.9	-4.21657	0.0731692	-57.6277	0	0
Bra039070	58210.3	-3.75325	0.0153216	-244.964	0	0
Bra039058	1476.89	-2.35188	0.0552567	-42.5629	0	0
Bra036518	9355.26	-0.937895	0.0249545	-37.5841	0	0
Bra036528	2131.89	-1.90899	0.0453433	-42.1008	0	0
Bra036577	3355.78	1.81369	0.0359909	50.3931	0	0
Bra036184	2445.24	-1.53657	0.0395084	-38.8922	0	0
Bra035933	2380.77	2.3283	0.0445703	52.2387	0	0
Bra035897	1714.23	2.50608	0.052453	47.7776	0	0
Bra037761	28042.3	-1.44287	0.0190712	-75.6568	0	0
Bra037811	1585.73	-2.04981	0.0524792	-39.0596	0	0
Bra037196	38178.7	-0.700706	0.0172601	-40.5969	0	0
Bra037181	2754.32	-2.2297	0.040467	-55.0993	0	0
Bra037164	59394.1	-1.04388	0.0144128	-72.4272	0	0
Bra037115	1924.48	2.63992	0.0505058	52.2697	0	0
Bra037113	1837.24	2.77381	0.0534465	51.8988	0	0
Bra037112	4855.52	3.07679	0.035639	86.332	0	0
Bra038517	4856.41	-2.53123	0.0333997	-75.7861	0	0
Bra038521	2001.26	-2.95803	0.0515307	-57.4033	0	0
Bra038548	3613.55	-1.70865	0.0360602	-47.3832	0	0
Bra027047	1649.45	-3.16499	0.0589513	-53.6881	0	0
Bra027083	61206.6	-2.24524	0.0136181	-164.872	0	0
Bra027109	36616.7	-1.01976	0.0151844	-67.1586	0	0
Bra027838	1665.33	-2.92145	0.0573325	-50.9563	0	0
Bra027877	5141.94	-1.73328	0.0289449	-59.8821	0	0
Bra027920	2984.97	-2.87518	0.0445152	-64.5887	0	0
Bra027940	6211.2	1.2913	0.0286948	45.001	0	0
Bra027981	1013.11	-3.60506	0.0831033	-43.3805	0	0
Bra038384	4035.11	-1.48594	0.0315323	-47.1245	0	0
Bra038377	7965.44	-1.05839	0.0227313	-46.5607	0	0
Bra037913	97676	-1.45562	0.0151707	-95.9495	0	0
Bra032902	2681.3	-2.30292	0.0417402	-55.1728	0	0
Bra032845	1674.68	-2.22894	0.0514143	-43.3524	0	0
Bra027602	2569.29	-5.01315	0.0721214	-69.5099	0	0
Bra027569	1582.56	-2.18705	0.053801	-40.6508	0	0
Bra027485	9549.27	-0.955877	0.022762	-41.9945	0	0
Bra017390	1021.64	2.63759	0.0701159	37.6176	0	0
Bra017435	8528.58	-1.37739	0.0255076	-53.9991	0	0
Bra017462	1613.27	-2.03954	0.050665	-40.2554	0	0
Bra017464	2622.71	-3.05052	0.0456824	-66.7767	0	0
Bra029563	55519.8	-0.789454	0.0148513	-53.1572	0	0
Bra029505	2131.02	-3.3287	0.0538239	-61.8443	0	0
Bra028091	1530.59	3.52929	0.0696641	50.6615	0	0
Bra028006	5658.65	-1.62054	0.0271229	-59.7479	0	0
Bra023294	4435.29	-1.9753	0.0333174	-59.2872	0	0
Bra023176	43757.8	-1.03077	0.0160894	-64.0656	0	0
Bra032384	15106.5	-1.46424	0.0185076	-79.1157	0	0
Bra032345	65524.9	-2.30443	0.0136355	-169.002	0	0
Bra032343	2089.8	-1.88891	0.0461738	-40.9086	0	0
Bra032309	1289.43	-2.9167	0.0649477	-44.9084	0	0
Bra032293	817.946	-4.35355	0.108378	-40.1701	0	0
Bra024662	6305.25	-4.04761	0.0372755	-108.586	0	0
Bra024611	3283.08	-2.5512	0.038639	-66.0264	0	0
Bra024580	9629.75	-1.14671	0.0225167	-50.9269	0	0
Bra036022	1495.87	-2.70552	0.0581095	-46.5589	0	0
Bra036048	1872.45	-2.70498	0.0545016	-49.6312	0	0
Bra036862	1407.07	-2.3068	0.055278	-41.7308	0	0
Bra006949	2752.82	-2.71251	0.0466226	-58.1802	0	0
Bra006975	2129.43	2.29153	0.0473242	48.422	0	0
Bra007039	1022.33	-3.55984	0.0801792	-44.3985	0	0
Bra007070	3106.43	1.58525	0.0369702	42.879	0	0
Bra007099	2312.82	-3.14278	0.0508648	-61.787	0	0
Bra007109	54628.4	-1.89044	0.0148768	-127.074	0	0
Bra007162	1443.09	-2.57068	0.0576641	-44.5802	0	0
Bra007195	3368.26	-4.48142	0.0552357	-81.1327	0	0
Bra007205	14188.3	-3.41666	0.0238642	-143.171	0	0
Bra007284	12047.5	-1.78255	0.0241745	-73.7371	0	0
Bra007315	2492.09	3.89117	0.0570868	68.1623	0	0
Bra007333	9901.51	-1.37769	0.0214001	-64.378	0	0
Bra007334	4623.86	-4.91885	0.0531249	-92.5903	0	0
Bra007444	8099.26	-3.51458	0.031282	-112.352	0	0
Bra007446	1121.19	-3.34361	0.0731721	-45.6951	0	0
Bra007679	2144.06	-1.89528	0.0456828	-41.4878	0	0
Bra007696	1549.83	-3.50865	0.0645673	-54.341	0	0
Bra007841	2631.39	-2.06055	0.0417499	-49.3546	0	0
Bra039217	5513.6	-3.5076	0.0354225	-99.0218	0	0
Bra039945	1636.22	-2.16108	0.0502882	-42.9739	0	0
Bra031210	14399.2	3.14033	0.0226803	138.46	0	0
Bra031074	2565.43	3.89683	0.0563125	69.2001	0	0
Bra031065	2355.36	-3.48984	0.0531324	-65.6818	0	0
Bra031048	2254.15	-3.62164	0.0548258	-66.0572	0	0
Bra026745	20598.1	-1.77856	0.0216861	-82.0141	0	0
Bra026804	1134.87	-2.90361	0.0667982	-43.4683	0	0
Bra026991	1290.38	3.11895	0.0665699	46.8523	0	0
Bra031763	2990.26	-2.003	0.037994	-52.7189	0	0
Bra031749	5664.27	1.67988	0.028639	58.6571	0	0
Bra031690	2816.02	-3.48311	0.0489154	-71.2068	0	0
Bra031656	13345.6	-2.41883	0.0215627	-112.177	0	0
Bra031649	4739.77	-1.49837	0.0302299	-49.5659	0	0
Bra031624	29810.9	-1.52012	0.0179694	-84.5949	0	0
Bra031534	28879.5	-1.29186	0.0177772	-72.6695	0	0
Bra032591	6083.62	-3.51716	0.0337297	-104.275	0	0
Bra032622	5494.15	-3.16906	0.0358206	-88.4704	0	0
Bra005891	3008.73	-3.23464	0.0453438	-71.3358	0	0
Bra005984	2124.11	-2.34151	0.0476523	-49.1373	0	0
Bra006036	4023.88	-1.23062	0.0314367	-39.1459	0	0
Bra006086	2070.3	5.87059	0.107178	54.774	0	0
Bra006208	33904.8	-1.55985	0.0149946	-104.027	0	0
Bra006235	5941.97	-1.27428	0.0268656	-47.4316	0	0
Bra006239	3805.87	-1.61135	0.0338983	-47.5348	0	0
Bra006403	937.689	-3.0335	0.0759061	-39.9639	0	0
Bra006567	1635.68	4.20986	0.0757144	55.6019	0	0
Bra006709	1929.62	-2.84545	0.0542173	-52.4822	0	0
Bra006795	3186.73	2.07284	0.037097	55.8762	0	0
Bra006796	1545.05	4.49789	0.0843278	53.3381	0	0
Bra006809	1170.26	3.27651	0.0728412	44.9815	0	0
Bra006850	6350.15	1.67264	0.0262182	63.7967	0	0
Bra028924	11410.2	-0.833584	0.0210341	-39.6302	0	0
Bra029001	6844.05	-1.60131	0.0270111	-59.2835	0	0
Bra029040	2107.91	-4.64424	0.0725259	-64.0356	0	0
Bra029093	1302.54	2.29139	0.058576	39.1182	0	0
Bra022772	3779.81	-3.66247	0.0432467	-84.6878	0	0
Bra022805	1096.11	-3.01306	0.0699924	-43.0484	0	0
Bra022815	5107.48	2.60314	0.0323797	80.394	0	0
Bra022905	1311.9	-3.32378	0.0675987	-49.1693	0	0
Bra022976	122219	-2.16956	0.0120933	-179.402	0	0
Bra023006	1792.83	-2.40319	0.049985	-48.0782	0	0
Bra023103	1603.63	-2.50116	0.0540998	-46.2324	0	0
Bra000056	1234.62	-2.35699	0.0609817	-38.6509	0	0
Bra000064	2968.79	-1.62509	0.0363182	-44.7458	0	0
Bra000144	95425.9	-1.17258	0.01237	-94.7919	0	0
Bra000158	7444.83	-3.80636	0.0337028	-112.939	0	0
Bra000214	3940.01	-1.62721	0.0325099	-50.0528	0	0
Bra000227	15948.5	-1.28492	0.0205838	-62.4238	0	0
Bra000310	1402	3.66441	0.0730368	50.1721	0	0
Bra000311	1078.45	3.72231	0.0826646	45.0291	0	0
Bra000365	3350.9	1.96598	0.0358339	54.8637	0	0
Bra000460	6502.03	-1.11906	0.0250716	-44.6346	0	0
Bra000474	10512.8	-1.20979	0.0230887	-52.3976	0	0
Bra000508	5620.88	-3.35234	0.0349904	-95.8074	0	0
Bra000571	3879.33	-2.7196	0.0372893	-72.9324	0	0
Bra000660	7307.6	-3.50404	0.0310585	-112.821	0	0
Bra000663	10436.4	-1.05169	0.0207711	-50.6323	0	0
Bra000670	2206.62	-3.74293	0.0592584	-63.1629	0	0
Bra000687	17641.8	-0.742409	0.0187272	-39.6434	0	0
Bra000708	14051.4	-2.0715	0.0206646	-100.244	0	0
Bra000734	8996.68	1.14577	0.0260031	44.0628	0	0
Bra000775	920.891	3.57318	0.0863148	41.3971	0	0
Bra000811	910.995	-2.97043	0.0771851	-38.4846	0	0
Bra000875	1880.26	2.99341	0.0548014	54.6228	0	0
Bra000876	855.773	4.28619	0.10538	40.6735	0	0
Bra000903	1630.21	-4.67669	0.0827829	-56.4935	0	0
Bra001046	10693.8	-1.45457	0.0214687	-67.753	0	0
Bra001086	16403.3	2.15217	0.0246944	87.1519	0	0
Bra001122	1753.91	4.70321	0.0829667	56.6879	0	0
Bra001422	2915.73	-3.13822	0.0468175	-67.0309	0	0
Bra001457	4117.57	-2.51115	0.0342696	-73.2763	0	0
Bra001500	3133.24	1.37054	0.0361719	37.8896	0	0
Bra001626	2069.06	-1.77227	0.04596	-38.561	0	0
Bra001653	7861.86	2.01679	0.026737	75.4306	0	0
Bra001676	8517.55	0.940968	0.0229716	40.9622	0	0
Bra001752	822.87	-4.12387	0.100485	-41.0396	0	0
Bra001774	1287.3	2.60716	0.0641656	40.6317	0	0
Bra001789	5736.06	-2.31685	0.0313101	-73.997	0	0
Bra001809	15047.6	-0.923774	0.0195547	-47.2404	0	0
Bra001921	1673.9	2.10963	0.0512269	41.182	0	0
Bra001934	3641.67	-1.36342	0.0328266	-41.5341	0	0
Bra013224	7006.22	-1.6808	0.0258041	-65.1368	0	0
Bra013183	43812.8	-2.98981	0.0180889	-165.284	0	0
Bra013148	33059.6	-0.781687	0.0145501	-53.7237	0	0
Bra013123	14694.7	3.39708	0.0245438	138.409	0	0
Bra013091	7038.17	1.61055	0.0258926	62.2014	0	0
Bra013034	1692.5	-2.55713	0.053271	-48.0022	0	0
Bra013026	3588.5	5.22752	0.0675693	77.3654	0	0
Bra012964	2214.65	2.65701	0.0483512	54.9523	0	0
Bra012938	3018.75	-1.76173	0.0384842	-45.7781	0	0
Bra012910	2340.52	-4.00176	0.0586371	-68.2462	0	0
Bra012850	2834.51	-1.42419	0.0369815	-38.5108	0	0
Bra012788	6036.54	1.88157	0.0292979	64.2219	0	0
Bra012779	7303.1	-2.36659	0.0268219	-88.2333	0	0
Bra012676	7118.94	2.15026	0.0265942	80.8543	0	0
Bra012571	2451.39	-1.86316	0.0405424	-45.9559	0	0
Bra019406	3338.46	-2.68574	0.0388238	-69.1778	0	0
Bra019382	2617.65	-1.86279	0.0409696	-45.4677	0	0
Bra019357	1092.66	-2.86142	0.0686571	-41.677	0	0
Bra019354	2581.27	-1.74567	0.0389892	-44.7731	0	0
Bra019295	1724.6	-2.1761	0.0506889	-42.9305	0	0
Bra019193	3624.5	-1.54376	0.0327124	-47.192	0	0
Bra019049	10437	-1.37631	0.0229515	-59.9659	0	0
Bra024126	890.593	-4.60412	0.108712	-42.3515	0	0
Bra024095	7196.31	-1.83172	0.0260558	-70.3	0	0
Bra024075	2842.03	-1.9478	0.0378624	-51.4442	0	0
Bra023998	2193.01	-2.40655	0.0454232	-52.9806	0	0
Bra023967	7192.96	-1.28659	0.0240387	-53.5215	0	0
Bra017628	2036.81	-3.44178	0.0557328	-61.7551	0	0
Bra017722	1182.35	-2.37315	0.0612606	-38.7387	0	0
Bra017741	1899.48	-1.89164	0.0464582	-40.717	0	0
Bra017823	2806.95	-2.02061	0.0401967	-50.268	0	0
Bra017839	4447.77	-3.47725	0.0400591	-86.8031	0	0
Bra011830	871.452	-3.15499	0.0800406	-39.4174	0	0
Bra011821	2702.56	1.84057	0.0401614	45.8293	0	0
Bra011749	2188.54	-2.61197	0.0481191	-54.2813	0	0
Bra011656	5157.06	-2.23825	0.0313456	-71.4057	0	0
Bra011636	965.6	-4.08598	0.0921046	-44.3624	0	0
Bra011605	10275	-0.839475	0.020814	-40.3322	0	0
Bra011573	4088.28	2.65651	0.0370686	71.6645	0	0
Bra011554	1862.07	-2.08017	0.0472452	-44.0293	0	0
Bra011529	917.025	-5.96189	0.158423	-37.6328	0	0
Bra011514	4771.11	-1.25214	0.0290756	-43.0649	0	0
Bra011500	2380.8	-1.99206	0.0441128	-45.1584	0	0
Bra011345	9964.97	1.0651	0.0234283	45.4621	0	0
Bra011339	1722.56	2.39089	0.0523032	45.712	0	0
Bra011181	1005.14	-3.69746	0.0842984	-43.8616	0	0
Bra011135	1184.73	-3.84922	0.0791832	-48.6116	0	0
Bra011057	14013.2	-1.40465	0.0203992	-68.8581	0	0
Bra040158	937.437	-3.28214	0.079605	-41.2303	0	0
Bra013314	7921.88	-1.13879	0.0243089	-46.8465	0	0
Bra013382	3099.48	-1.58218	0.0353435	-44.7659	0	0
Bra013426	1056.23	3.35006	0.0778826	43.0143	0	0
Bra013476	13323.4	-3.09731	0.0254446	-121.728	0	0
Bra013579	2729.26	-2.74053	0.0439093	-62.4135	0	0
Bra013674	4740.27	1.79492	0.0306765	58.5111	0	0
Bra013678	4844.94	-2.25981	0.0320345	-70.5429	0	0
Bra013714	1438.84	2.76066	0.0595683	46.3444	0	0
Bra013815	1512.88	-2.99258	0.0599101	-49.9512	0	0
Bra013859	5566.94	-1.24186	0.0280427	-44.2848	0	0
Bra013931	7879.03	-1.28947	0.0248565	-51.8767	0	0
Bra026495	2989.78	-3.08517	0.0449722	-68.6018	0	0
Bra026466	1295.61	-2.7731	0.0619888	-44.7354	0	0
Bra026409	5002.47	-1.41149	0.0279966	-50.4166	0	0
Bra026364	2920.76	-2.56383	0.0450523	-56.9078	0	0
Bra026349	11789.2	-1.53855	0.0207406	-74.1805	0	0
Bra026314	5306.09	-1.69311	0.029733	-56.9438	0	0
Bra026237	1762.61	-2.36107	0.0503181	-46.9228	0	0
Bra026230	1735.38	2.2402	0.0513326	43.6408	0	0
Bra033545	7638.74	1.07645	0.0237327	45.3572	0	0
Bra033495	5624.26	-1.49977	0.0274271	-54.6819	0	0
Bra038863	27647.8	-0.956264	0.0157706	-60.6357	0	0
Bra033813	2834.22	-2.1244	0.0406941	-52.2042	0	0
Bra033802	12049.4	-1.06719	0.0200002	-53.3591	0	0
Bra029990	1246.96	-4.25174	0.0845671	-50.2765	0	0
Bra035447	3815.72	-1.79595	0.0349827	-51.3383	0	0
Bra031471	10882.8	-1.12877	0.0204926	-55.0819	0	0
Bra031427	54685.2	-1.31044	0.0140121	-93.5224	0	0
Bra028379	1346.84	-2.21591	0.0570409	-38.8478	0	0
Bra028290	1317.91	-6.06749	0.136623	-44.4103	0	0
Bra037542	1986.44	-2.74952	0.0519343	-52.9423	0	0
Bra021208	1040.6	-2.90688	0.0696727	-41.722	0	0
Bra021110	4520.94	-4.06264	0.0437355	-92.8913	0	0
Bra021101	4065.35	-2.4043	0.0384354	-62.5543	0	0
Bra021569	975.401	-2.99999	0.0736806	-40.7161	0	0
Bra021506	7888.36	-0.937186	0.0239463	-39.1371	0	0
Bra038734	2446.77	-2.84922	0.0466549	-61.0702	0	0
Bra034164	1599.89	2.11427	0.0523119	40.4167	0	0
Bra034163	2842.46	2.63745	0.0422694	62.3962	0	0
Bra034140	2734.21	-3.90785	0.0535633	-72.9576	0	0
Bra034103	3947.18	-1.76406	0.0324011	-54.4444	0	0
Bra040374	809.516	-3.40921	0.0861542	-39.571	0	0
Bra028419	3670.98	-2.82691	0.0386597	-73.1228	0	0
Bra028523	5307.13	-2.02368	0.0293324	-68.9912	0	0
Bra028533	2391.29	-2.72683	0.0467117	-58.3757	0	0
Bra028910	2615.09	-2.00318	0.0403311	-49.6686	0	0
Bra028906	16719.2	-1.50465	0.0206841	-72.7442	0	0
Bra028784	2610.3	-1.71135	0.0402643	-42.5029	0	0
Bra028660	2676.29	1.53445	0.0394254	38.9203	0	0
Bra023398	2053.62	-2.27001	0.0465665	-48.7477	0	0
Bra023434	985.472	-2.8444	0.072711	-39.1192	0	0
Bra023676	1578.75	4.16253	0.0759828	54.7826	0	0
Bra020113	5778.56	1.4166	0.0270554	52.3595	0	0
Bra020123	1399.63	2.24815	0.0560457	40.1128	0	0
Bra020140	1035.98	3.5967	0.0827208	43.48	0	0
Bra020179	1680.87	-2.51346	0.0539835	-46.5598	0	0
Bra020313	1628.01	-2.5261	0.056082	-45.0429	0	0
Bra020433	12157.5	-2.59732	0.0231242	-112.32	0	0
Bra035641	3063.51	-3.52529	0.0724111	-48.6844	0	0
Bra035599	4037.61	-1.87788	0.0333606	-56.2903	0	0
Bra035593	5442.78	-1.84117	0.0291253	-63.2154	0	0
Bra022723	4162.46	-3.33006	0.0394449	-84.4231	0	0
Bra022585	5594.37	1.37968	0.0293742	46.9692	0	0
Bra033938	1634.58	-2.88451	0.0565242	-51.0314	0	0
Bra038360	2262.84	-2.80703	0.0482513	-58.1752	0	0
Bra007864	2369.93	2.90756	0.0485793	59.8518	0	0
Bra007885	1934.89	-4.33463	0.0695832	-62.2942	0	0
Bra007887	936.04	-5.64051	0.142202	-39.6655	0	0
Bra007906	7770.99	-2.26389	0.0261013	-86.7345	0	0
Bra007912	4426.66	-1.72013	0.0329549	-52.1966	0	0
Bra008037	2161.98	-2.96387	0.0499251	-59.3664	0	0
Bra008055	5817.38	1.44762	0.0275833	52.4819	0	0
Bra008101	5572.15	-2.79764	0.035427	-78.9691	0	0
Bra008152	14359.9	-0.957715	0.0190465	-50.2831	0	0
Bra008191	3628.73	1.34073	0.0335501	39.9622	0	0
Bra008242	8304.07	-1.41736	0.0270005	-52.4939	0	0
Bra008392	28515	-0.671644	0.016518	-40.6614	0	0
Bra008406	2705.65	-1.89993	0.0395408	-48.05	0	0
Bra008435	3059.78	-3.90656	0.0505869	-77.2248	0	0
Bra008513	2044.91	-1.74616	0.0445966	-39.1546	0	0
Bra033198	1345.08	-2.41781	0.0579523	-41.7207	0	0
Bra021965	2435.22	-5.25245	0.079159	-66.3531	0	0
Bra022019	12889.6	-0.882236	0.0187148	-47.1411	0	0
Bra033022	40877.3	-3.46592	0.0173203	-200.107	0	0
Bra032945	12314.5	1.48114	0.0249195	59.4371	0	0
Bra036344	4247.11	-1.37268	0.030944	-44.3601	0	0
Bra020800	1709.73	2.36205	0.0542224	43.5623	0	0
Bra020724	6487.72	-1.33745	0.0251707	-53.1353	0	0
Bra020715	1862.55	-1.73109	0.046004	-37.629	0	0
Bra020523	3273.26	-1.54662	0.0358185	-43.1793	0	0
Bra020472	3517.39	-1.83749	0.0357789	-51.3568	0	0
Bra029301	2162.06	-2.16416	0.0450165	-48.0748	0	0
Bra029278	825.82	4.10911	0.103027	39.884	0	0
Bra031927	8148.29	-2.16106	0.0249777	-86.5195	0	0
Bra031898	6896.4	-1.93334	0.0275739	-70.1147	0	0
Bra031813	45083.2	-1.09014	0.0147316	-73.9999	0	0
Bra038011	8125.15	-1.37136	0.0296013	-46.3276	0	0
Bra037954	3015.22	2.56093	0.0412027	62.1545	0	0
Bra039661	4406.6	-1.48513	0.0312322	-47.5511	0	0
Bra019002	1186.32	-2.57025	0.0622667	-41.2781	0	0
Bra018969	5530.13	1.90712	0.0286277	66.618	0	0
Bra018941	12634.4	1.72185	0.0207205	83.0987	0	0
Bra018940	25038.1	1.12895	0.019535	57.7912	0	0
Bra018907	3752.26	-2.37109	0.0357521	-66.3202	0	0
Bra018750	2176.78	2.92943	0.0506362	57.8525	0	0
Bra018703	997.867	-3.58933	0.0808122	-44.4157	0	0
Bra018700	8914.22	0.86035	0.022603	38.0636	0	0
[truncated: 41,869 more rows]

## Sheet: adjp lessthan 0.05
Bra036240
[truncated: 17,930 more rows]

## Sheet: company FDR lessthan0.05
Gene_ID	Gene Families	#N/A	Gene_ID	TAIR_ID	Gene_Symbol	Gene_Info	logFC	logCPM	LR	PValue	FDR	TMMValue_DB_1_S3	TMMValue_DB_2_S4	TMMValue_DB_3_S5	TMMValue_PP5_1_S12	TMMValue_PP5_2_S13	TMMValue_PP5_3_S14	RawCount_DB_1_S3	RawCount_DB_2_S4	RawCount_DB_3_S5	RawCount_PP5_1_S12	RawCount_PP5_2_S13	RawCount_PP5_3_S14	Gene_ID
[truncated: 20,824 more rows]

[truncated: 9 more sheets: All-common, gene list-common, common in edgeR and DESeq2, All common in edgeR and DEseq2, All-up (FC=2), All-down (FC=2), Sheet9, No Annotation, Unique]
