# Supplementary material for: BrPP5.2 Overexpression Confers Heat Shock Tolerance in Transgenic Brassica rapa through Inherent Chaperone Activity, Induced Glucosinolate Biosynthesis, and Differential Regulation of Abiotic Stress Response Genes
Source: Int J Mol Sci. 2021 Jun 16;22(12):6437. doi: 10.3390/ijms22126437 (PMC8234546; doi:10.3390/ijms22126437)
Supplement: Supplementary file 1 [file ijms-22-06437-s001.zip › point data all with color with count.csv]

chr	stchrArt	end	value1	color	total count per chr
chrA06	4456947	4457568	-6.312790181	a	636			Down	Up
chrA09	36743949	36744489	-6.293426554	a	855	chrA01	604	350	254		3317-dwn
chrA03	12180993	12182684	-6.271184778	a	880	chrA02	602	314	288
chrA08	12440648	12441158	-6.069252825	a	413	chrA03	880	480	400
chrA01	18904922	18905585	-6.067488465	a	604	chrA04	407	224	183
chrA03	29558813	29559626	-6.063427138	a	880	chrA05	499	275	224
chrA06	5755807	5756450	-5.986210797	a	636	chrA06	636	359	277
chrA01	1811540	1812329	-5.961893194	a	604	chrA07	540	318	222
chrA08	19854099	19854708	-5.849145645	a	413	chrA08	413	220	193
chrA09	32640700	32642578	-5.849096707	a	855	chrA09	855	487	368
chrA08	17815263	17816149	-5.814589319	a	413	chrA10	405	232	173
chrA07	20409123	20418434	-5.763337823	a	540	Scaffolds	128	58	70
chrA09	27758360	27761297	-5.67412807	a	855
chrA02	11600340	11601414	-5.640514544	a	602
chrA02	3706241	3706604	-5.591939261	a	602
chrA03	22286910	22288383	-5.574099468	a	880
chrA04	14156946	14157935	-5.505428821	a	407
chrA07	19251240	19251792	-5.439606248	a	540
chrA08	16105567	16106906	-5.39162798	a	413
chrA03	20212442	20214399	-5.357345456	a	880
chrA09	11963234	11963723	-5.279868681	a	855
chrA02	17949653	17951487	-5.252446416	a	602
chrA01	18900881	18901595	-5.175786619	a	604
chrA03	12304374	12304596	-5.146569038	a	880
chrA03	1709679	1709928	-5.12967232	a	880
chrA03	11697133	11698613	-5.107754072	a	880
chrA06	22320114	22321011	-5.085310945	a	636
chrA08	706654	707438	-5.065950459	a	413
chrA03	21367149	21367747	-5.065020552	a	880
chrA02	27645698	27647058	-5.034789919	a	602
chrA06	5775606	5776044	-5.032327472	a	636
chrA03	8073105	8073447	-5.029251163	a	880
chrA09	12959713	12961629	-5.013152852	a	855
chrA07	15427500	15434332	-4.982035174	a	540
chrA02	10433706	10435686	-4.977635276	a	602
chrA03	26387030	26387480	-4.960797549	a	880
chrA09	28660051	28662751	-4.918854029	a	855
chrA04	9982114	9983443	-4.900551873	a	407
chrA10	12836045	12837802	-4.87541825	a	405
chrA05	21309997	21311262	-4.860610918	a	499
chrA03	9223820	9224405	-4.858624343	a	880
chrA02	8750999	8752347	-4.801274626	a	602
chrA05	2866782	2868039	-4.749470751	a	499
chrA08	21579863	21582579	-4.7402271	a	413
chrA05	471186	473554	-4.688944825	a	499
chrA03	13823126	13825169	-4.676693506	a	880
chrA02	26085287	26086188	-4.67450616	a	602
chrA03	22039819	22041129	-4.646953919	a	880
chrA03	6019215	6019470	-4.64423894	a	880
chrA01	25119773	25120739	-4.625271157	a	604
chrA03	27441924	27443441	-4.60411986	a	880
chrA07	3728198	3729383	-4.585983958	a	540
chrA04	18417233	18417941	-4.569085571	a	407
chrA03	20395692	20397267	-4.553744355	a	880
chrA10	13519068	13522162	-4.550135858	a	405
chrA01	9822817	9823336	-4.506434384	a	604
chrA03	26633105	26633294	-4.48930918	a	880
chrA07	13951931	13953469	-4.486540728	a	540
chrA09	27885482	27886760	-4.481424234	a	855
chrA09	34506146	34506764	-4.476337005	a	855
chrA08	14190531	14190959	-4.473024453	a	413
chrA01	4449173	4451176	-4.426149357	a	604
chrA05	4750425	4753464	-4.38356801	a	499
chrA04	4528507	4528828	-4.381326681	a	407
chrA01	6727189	6727672	-4.376185726	a	604
chrA07	20202586	20206143	-4.37234848	a	540
chrA07	14641599	14642274	-4.361738557	a	540
chrA06	9839483	9841004	-4.361069933	a	636
chrA09	22779402	22786605	-4.353552517	a	855
chrA10	4258683	4261059	-4.352274755	a	405
chrA02	20598661	20601943	-4.338913441	a	602
chrA10	4454879	4457684	-4.338485597	a	405
chrA02	11582953	11584147	-4.334626547	a	602
chrA07	18713685	18716094	-4.317849557	a	540
chrA09	24524572	24525062	-4.287810085	a	855
chrA06	24330028	24331363	-4.287570782	a	636
chrA09	7383581	7384139	-4.272964307	a	855
chrA03	11980353	11981559	-4.253579245	a	880
chrA01	15525616	15526501	-4.251739846	a	604
chrA10	16028782	16030105	-4.241262872	a	405
chrA09	1167855	1168441	-4.21657433	a	855
chrA05	16627653	16628319	-4.19610347	a	499
chrA06	7462466	7462934	-4.183870458	a	636
chrA03	11761956	11763340	-4.182769483	a	880
chrA04	15482187	15485782	-4.172501848	a	407
chrA10	8013642	8014572	-4.149335159	a	405
chrA03	6437066	6439647	-4.147804918	a	880
chrA07	18630785	18632066	-4.139527071	a	540
chrA09	36811975	36812806	-4.132757479	a	855
chrA02	2945321	2945846	-4.129541228	a	602
chrA03	18247424	18248228	-4.123873618	a	880
chrA02	4195814	4196366	-4.111723296	a	602
chrA02	16293051	16293789	-4.086333722	a	602
chrA01	1329056	1329920	-4.085984743	a	604
chrA01	23935498	23936658	-4.062641717	a	604
chrA03	16417052	16418278	-4.061658214	a	880
chrA04	13752305	13753564	-4.058900603	a	407
chrA09	23725006	23725961	-4.047609888	a	855
chrA03	20967609	20969223	-4.019467438	a	880
chrA06	19383957	19385124	-4.01488623	a	636
chrA06	22162117	22163209	-4.00468474	a	636
chrA03	21573455	21574337	-4.001759296	a	880
Scaffolds	421	3393	-3.998664388	a	128
chrA01	2896201	2897686	-3.994568557	a	604
chrA10	8020437	8021160	-3.991017943	a	405
chrA02	26076312	26077180	-3.967224436	a	602
chrA08	21524948	21527445	-3.959729916	a	413
chrA08	934562	937919	-3.952016773	a	413
chrA03	3358276	3358888	-3.945075493	a	880
chrA05	5135127	5138645	-3.943074238	a	499
chrA09	7123704	7127246	-3.933005908	a	855
chrA09	6422533	6423181	-3.930617331	a	855
chrA01	9203193	9204799	-3.918039381	a	604
chrA03	15019865	15020010	-3.91708083	a	880
chrA06	6799082	6812553	-3.90937347	a	636
chrA01	27251421	27254118	-3.907847573	a	604
chrA02	15607696	15609784	-3.906561756	a	602
chrA06	20988009	20988567	-3.898377015	a	636
chrA09	11871171	11871585	-3.882351105	a	855
chrA06	18760869	18761298	-3.881364256	a	636
chrA06	24188571	24189447	-3.880783555	a	636
chrA03	2884953	2885301	-3.880337697	a	880
chrA09	31417250	31422866	-3.877682329	a	855
chrA07	7308155	7309022	-3.873787879	a	540
chrA08	18748568	18751813	-3.86412046	a	413
chrA01	3730835	3732462	-3.849221762	a	604
chrA06	18798180	18798873	-3.840417189	a	636
chrA07	18968396	18970073	-3.820564359	a	540
chrA06	24145390	24145870	-3.817696044	a	636
chrA06	21192148	21193940	-3.807340738	a	636
chrA03	9618442	9619717	-3.806358508	a	880
chrA07	16032137	16032951	-3.805546785	a	540
chrA10	10503441	10505458	-3.79897239	a	405
chrA07	8657509	8658382	-3.79167562	a	540
chrA05	1149877	1151823	-3.79155592	a	499
chrA01	812148	813213	-3.786789848	a	604
chrA05	3328856	3329471	-3.775852552	a	499
chrA03	4209931	4210570	-3.772268768	a	880
chrA06	6780319	6781484	-3.753935622	a	636
chrA06	4340917	4341202	-3.753727031	a	636
chrA09	1268057	1269113	-3.753253162	a	855
chrA09	29770037	29771671	-3.747807926	a	855
chrA07	19940262	19940882	-3.745837576	a	540
chrA03	12380142	12380523	-3.742933491	a	880
chrA03	7851306	7852949	-3.721289994	a	880
chrA05	483651	485144	-3.712716168	a	499
chrA07	14367231	14370775	-3.699599239	a	540
chrA01	3453216	3454260	-3.697464177	a	604
chrA07	14649222	14649855	-3.693576463	a	540
chrA06	21299176	21301768	-3.671799209	a	636
chrA03	18129565	18129748	-3.669263412	a	880
chrA05	19145340	19145892	-3.668818748	a	499
chrA06	9207895	9208189	-3.66666184	a	636
chrA03	6970634	6971844	-3.662468763	a	880
chrA07	18024576	18025960	-3.660596483	a	540
chrA08	13481186	13482411	-3.659827298	a	413
chrA04	14918689	14922814	-3.650847648	a	407
chrA05	18946692	18947139	-3.649351423	a	499
Scaffolds	125068	127056	-3.649206558	a	128
chrA10	13308685	13309699	-3.647504872	a	405
chrA05	6285230	6285700	-3.638897503	a	499
chrA09	14389404	14393189	-3.637488633	a	855
chrA02	6175995	6177399	-3.634455889	a	602
chrA03	19295199	19296380	-3.625213347	a	880
chrA09	32749758	32750907	-3.62163515	a	855
chrA07	10093837	10094903	-3.612410728	a	540
chrA06	2418286	2420956	-3.611791199	a	636
chrA01	10435936	10436811	-3.6087415	a	604
chrA05	12595337	12596609	-3.606207574	a	499
chrA09	10290101	10290656	-3.605058675	a	855
chrA08	7083866	7086108	-3.602480431	a	413
chrA06	2480570	2510700	-3.589330322	a	636
chrA02	623580	625510	-3.588120231	a	602
chrA06	7581493	7586315	-3.582776474	a	636
chrA05	17704956	17705964	-3.582699831	a	499
chrA07	20401993	20403067	-3.579548753	a	540
chrA06	3291907	3292884	-3.572243206	a	636
chrA08	18854472	18854844	-3.565279029	a	413
chrA09	28134521	28135324	-3.565002108	a	855
chrA05	12776303	12783075	-3.564438003	a	499
chrA05	1131817	1132153	-3.564035749	a	499
chrA01	22987156	22987769	-3.563891003	a	604
chrA09	26988518	26989881	-3.55983908	a	855
chrA07	10254999	10257750	-3.555073701	a	540
chrA03	14583682	14584789	-3.553604397	a	880
chrA04	1219850	1221876	-3.55357903	a	407
chrA09	32692316	32692571	-3.545848244	a	855
chrA05	22998957	23001041	-3.541909632	a	499
chrA04	301725	303105	-3.530256504	a	407
chrA05	5538755	5540234	-3.530112736	a	499
chrA04	16986631	16987897	-3.526907897	a	407
chrA05	3559452	3562045	-3.526776717	a	499
chrA02	7018461	7019595	-3.525292119	a	602
chrA07	16318003	16319588	-3.522069391	a	540
chrA09	36746611	36748877	-3.517159026	a	855
chrA09	29240132	29241722	-3.514583191	a	855
chrA07	22364678	22366218	-3.512740122	a	540
chrA08	21193328	21194455	-3.510687281	a	413
chrA09	30443284	30444655	-3.508648136	a	855
chrA09	31437396	31439538	-3.507600305	a	855
chrA03	12343456	12344401	-3.504039009	a	880
chrA09	29221809	29224531	-3.499975739	a	855
chrA09	9022054	9025087	-3.499133467	a	855
chrA04	13777151	13778401	-3.496405775	a	407
chrA06	23833211	23835571	-3.493246676	a	636
chrA09	5175291	5177332	-3.49119741	a	855
chrA09	32662832	32664240	-3.489835036	a	855
chrA03	9501673	9503552	-3.485114346	a	880
chrA09	35229165	35231257	-3.483107738	a	855
chrA05	3332600	3333065	-3.482864989	a	499
chrA05	17452426	17453400	-3.479560027	a	499
chrA01	938213	940338	-3.477462307	a	604
chrA03	30827540	30829159	-3.477253553	a	880
chrA02	21860050	21860936	-3.465916317	a	602
chrA05	3082878	3084652	-3.461659833	a	499
chrA10	10857440	10859043	-3.45769953	a	405
chrA03	29407622	29409635	-3.441783984	a	880
chrA09	221922	222314	-3.434890568	a	855
chrA02	6731873	6732901	-3.428520433	a	602
chrA09	30924143	30926154	-3.418114455	a	855
chrA09	27977804	27979442	-3.41665506	a	855
chrA03	30547985	30550158	-3.415656551	a	880
chrA03	22042109	22047854	-3.41297723	a	880
chrA01	27941143	27942725	-3.409207902	a	604
chrA05	22305516	22307450	-3.391705277	a	499
chrA05	1159943	1161977	-3.386454411	a	499
chrA04	4194279	4195612	-3.380078738	a	407
chrA09	37094273	37094753	-3.374888353	a	855
chrA09	4771162	4771627	-3.366724729	a	855
chrA06	16436261	16437372	-3.363617787	a	636
chrA05	11925813	11926005	-3.357238812	a	499
chrA08	6207311	6212257	-3.356506234	a	413
chrA06	21960650	21960953	-3.353942701	a	636
chrA03	11499383	11501354	-3.352335497	a	880
chrA03	6556135	6557659	-3.349379995	a	880
chrA09	31783019	31787535	-3.346340144	a	855
chrA02	27236802	27237553	-3.34426249	a	602
chrA09	29248947	29249718	-3.343606122	a	855
chrA06	17060950	17062317	-3.34360451	a	636
chrA10	4153461	4154007	-3.340926173	a	405
chrA03	1168620	1169189	-3.335167804	a	880
chrA02	7789184	7789580	-3.330057936	a	602
chrA09	17482888	17484528	-3.32870163	a	855
chrA03	7673169	7675728	-3.323781278	a	880
chrA01	20497639	20498011	-3.322611898	a	604
chrA03	5971712	5972651	-3.321849695	a	880
chrA09	32982595	32983960	-3.320493288	a	855
chrA07	18726232	18727369	-3.319986253	a	540
chrA01	27142402	27143453	-3.315930608	a	604
chrA01	10328785	10329997	-3.313649212	a	604
chrA06	7004943	7005684	-3.310629267	a	636
chrA04	7987856	7988789	-3.30657662	a	407
chrA07	20372546	20373110	-3.306568773	a	540
chrA08	1077170	1077740	-3.299319059	a	413
chrA03	2531694	2535120	-3.293917677	a	880
chrA01	5536675	5537892	-3.288664831	a	604
chrA05	23315703	23316070	-3.282563259	a	499
chrA01	4383498	4384299	-3.282140891	a	604
chrA01	4126860	4128464	-3.279622186	a	604
chrA05	8057898	8062361	-3.272245159	a	499
chrA08	18934712	18939328	-3.269610004	a	413
chrA02	19481882	19483261	-3.255972378	a	602
chrA04	1671857	1672262	-3.251110604	a	407
chrA09	7860355	7862569	-3.245574444	a	855
chrA09	29973442	29974826	-3.243736647	a	855
chrA07	5657784	5659065	-3.24366856	a	540
chrA02	7849967	7851146	-3.240053004	a	602
chrA09	33484650	33486153	-3.236105793	a	855
chrA10	14409523	14409988	-3.234796888	a	405
chrA03	1084820	1085601	-3.234637727	a	880
chrA03	12159418	12161838	-3.232607067	a	880
chrA03	18615239	18615932	-3.230715527	a	880
chrA01	5868353	5869961	-3.223997283	a	604
chrA09	3952706	3954633	-3.223860994	a	855
chrA08	19071715	19072213	-3.223420094	a	413
chrA01	24521950	24523747	-3.223165202	a	604
chrA05	5531911	5533372	-3.22185798	a	499
Scaffolds	33815	34067	-3.221413718	a	128
chrA09	23886319	23887546	-3.216445117	a	855
chrA06	24837993	24838719	-3.215207703	a	636
chrA09	14752940	14753747	-3.214855008	a	855
chrA10	6156749	6157720	-3.213059858	a	405
chrA06	19403023	19405388	-3.199843424	a	636
chrA04	2095675	2096172	-3.187285048	a	407
chrA05	7857311	7857782	-3.183093645	a	499
Scaffolds	38545	39532	-3.182585382	a	128
chrA06	6514200	6515738	-3.182128155	a	636
chrA06	4589364	4590334	-3.175074853	a	636
chrA09	36740278	36741373	-3.172879252	a	855
chrA09	32554771	32556180	-3.16941761	a	855
chrA09	36884013	36887127	-3.169063141	a	855
chrA08	16929110	16929665	-3.168177696	a	413
chrA02	5438926	5440642	-3.167400412	a	602
chrA09	7889075	7890364	-3.164985906	a	855
chrA07	22520755	22522038	-3.163760615	a	540
chrA02	14223288	14223927	-3.159193968	a	602
chrA02	15641415	15643145	-3.156140316	a	602
chrA01	330894	333414	-3.154994287	a	604
chrA03	8267841	8268111	-3.153280948	a	880
chrA03	26524768	26525470	-3.152949881	a	880
chrA07	9724880	9725771	-3.150640001	a	540
chrA07	13006027	13008383	-3.146631082	a	540
chrA05	8435967	8438265	-3.146378781	a	499
chrA09	27309019	27310360	-3.142783332	a	855
chrA10	4987159	4988716	-3.142642832	a	405
chrA03	433864	435637	-3.142430943	a	880
chrA03	7149783	7151284	-3.141903931	a	880
chrA08	19199946	19200732	-3.140556884	a	413
chrA03	16299965	16301512	-3.138218147	a	880
chrA07	11446224	11446997	-3.131456451	a	540
chrA06	11853266	11854989	-3.120114936	a	636
chrA03	926844	927831	-3.119923052	a	880
chrA03	25381591	25381939	-3.113026934	a	880
chrA03	12218918	12220378	-3.104390405	a	880
chrA06	24912726	24914172	-3.10355608	a	636
chrA09	31501217	31501637	-3.101315941	a	855
chrA01	1056548	1056917	-3.100101354	a	604
chrA07	19008464	19009156	-3.099299726	a	540
chrA09	1492758	1493688	-3.098696979	a	855
chrA03	22978356	22979779	-3.097598193	a	880
chrA10	14851526	14858100	-3.097327282	a	405
chrA01	5874517	5876523	-3.097314424	a	604
chrA01	21530777	21531572	-3.097172907	a	604
chrA09	1502360	1502678	-3.096500099	a	855
chrA03	4809972	4810679	-3.096471139	a	880
chrA03	26629572	26629761	-3.095867263	a	880
chrA05	11632367	11635210	-3.092400054	a	499
chrA07	19852550	19854596	-3.089092126	a	540
chrA01	8993074	8998506	-3.085171481	a	604
chrA09	1201835	1205398	-3.074347896	a	855
chrA09	29210187	29211913	-3.073815578	a	855
chrA06	21267092	21269888	-3.072749549	a	636
chrA02	3857290	3858238	-3.071910201	a	602
chrA01	8169387	8170106	-3.068085922	a	604
chrA08	9417601	9419344	-3.068053739	a	413
chrA10	4641530	4642993	-3.066114424	a	405
chrA05	10700559	10700980	-3.065122919	a	499
chrA03	20036573	20036825	-3.065116614	a	880
chrA02	3002173	3002638	-3.063215192	a	602
chrA01	1058217	1058592	-3.06229396	a	604
chrA03	1748127	1749637	-3.056282247	a	880
chrA10	8866007	8867454	-3.053540663	a	405
chrA09	15617842	15618739	-3.05051653	a	855
chrA06	25733360	25740725	-3.049824872	a	636
chrA08	12791381	12791811	-3.048536905	a	413
chrA01	19508478	19511300	-3.047874591	a	604
chrA05	6927040	6928051	-3.045133977	a	499
chrA03	25842321	25845375	-3.0432075	a	880
chrA03	3367779	3368403	-3.033498276	a	880
chrA07	11791312	11792347	-3.032245933	a	540
chrA05	3396575	3397486	-3.030163987	a	499
chrA06	25061700	25063602	-3.026646042	a	636
chrA05	2099726	2101689	-3.024482789	a	499
chrA09	11456862	11457616	-3.022936939	a	855
chrA06	6207115	6209059	-3.021680275	a	636
chrA07	12832615	12834265	-3.017990355	a	540
chrA03	7153861	7156519	-3.013062627	a	880
chrA05	22179370	22179829	-3.011714322	a	499
chrA10	10568600	10570159	-3.010195562	a	405
chrA08	19068077	19068996	-3.008861874	a	413
chrA01	24429326	24432258	-2.999987909	a	604
chrA09	24212736	24214537	-2.998295845	a	855
chrA09	13491961	13493095	-2.995753707	a	855
chrA01	7897693	7898641	-2.992577382	a	604
chrA09	13626608	13626902	-2.990009955	a	855
chrA03	20002722	20003606	-2.989814566	a	880
chrA03	7330164	7330383	-2.989471784	a	880
chrA04	578654	578950	-2.986876758	a	407
chrA09	21048798	21051008	-2.985229251	a	855
chrA03	15005565	15006791	-2.984379584	a	880
chrA08	10321648	10323399	-2.980462285	a	413
chrA03	5260642	5262374	-2.977059233	a	880
chrA10	13303896	13306718	-2.976787515	a	405
chrA01	22982829	22986660	-2.975292982	a	604
chrA10	1526235	1527684	-2.974281868	a	405
chrA07	17835026	17835737	-2.974138175	a	540
chrA03	13297112	13297812	-2.970433167	a	880
chrA07	817862	821230	-2.969335698	a	540
chrA02	8656825	8659478	-2.968558947	a	602
chrA10	11856387	11857680	-2.967140446	a	405
chrA10	5042816	5045645	-2.965619675	a	405
chrA04	7158225	7158807	-2.96534881	a	407
chrA02	12750929	12754565	-2.963869769	a	602
chrA08	20801722	20801980	-2.959455538	a	413
chrA09	5061144	5061543	-2.958030429	a	855
chrA05	21549946	21550570	-2.954865369	a	499
chrA01	13777383	13781205	-2.952614059	a	604
chrA09	1232376	1232712	-2.952604012	a	855
chrA02	3670074	3672253	-2.950898151	a	602
chrA07	5587779	5589360	-2.949384779	a	540
chrA03	374601	379913	-2.947186409	a	880
chrA07	155505	155931	-2.946168697	a	540
chrA01	9569609	9570986	-2.944246128	a	604
chrA04	1229331	1231256	-2.942660975	a	407
chrA09	14198405	14199269	-2.931883795	a	855
chrA01	3455583	3456712	-2.931721246	a	604
chrA02	26708514	26709042	-2.931380671	a	602
chrA10	15568668	15569382	-2.929885182	a	405
chrA09	29715106	29715897	-2.928723616	a	855
chrA05	1677417	1679353	-2.927852949	a	499
chrA09	35375794	35378090	-2.922933595	a	855
chrA09	9140678	9141900	-2.921450998	a	855
chrA02	4175509	4177751	-2.921419428	a	602
chrA02	26265590	26267227	-2.920585573	a	602
chrA06	24373864	24374752	-2.918064653	a	636
chrA09	22642879	22644994	-2.91670134	a	855
chrA04	18637610	18638228	-2.916076279	a	407
chrA10	16057969	16059283	-2.915314269	a	405
chrA05	6587372	6587666	-2.911360787	a	499
chrA01	23350743	23353152	-2.90688458	a	604
chrA01	17476682	17478091	-2.904763865	a	604
chrA09	33780818	33784291	-2.903605366	a	855
chrA09	35362628	35365327	-2.901993199	a	855
chrA09	27935262	27936285	-2.900578979	a	855
chrA09	9869960	9871612	-2.897259723	a	855
chrA09	14186275	14187832	-2.896058844	a	855
chrA01	22052378	22052963	-2.888449854	a	604
Scaffolds	268657	269775	-2.885594017	a	128
chrA02	10773995	10775997	-2.884508731	a	602
chrA06	16912684	16914858	-2.881754343	a	636
chrA09	9853695	9855267	-2.875177678	a	855
chrA09	32739194	32739461	-2.875092892	a	855
chrA09	31818704	31820076	-2.874390474	a	855
chrA08	14634844	14635621	-2.87082095	a	413
chrA01	2430971	2431661	-2.868691796	a	604
chrA02	2946791	2947298	-2.86553065	a	602
chrA05	4974292	4975078	-2.865440705	a	499
chrA10	13606059	13608182	-2.864448371	a	405
chrA03	24716852	24719052	-2.861419884	a	880
chrA07	21146234	21146780	-2.861096681	a	540
chrA08	12636849	12638413	-2.85976407	a	413
chrA07	3967559	3969190	-2.857942534	a	540
chrA01	3768905	3770255	-2.856753716	a	604
chrA09	5849462	5853837	-2.855193556	a	855
chrA02	19600918	19608969	-2.854835658	a	602
chrA06	25432171	25432906	-2.851713422	a	636
chrA05	2842608	2848115	-2.85111063	a	499
chrA01	26393328	26395966	-2.849220952	a	604
chrA06	8638037	8638460	-2.848905134	a	636
chrA09	30200730	30201824	-2.848688036	a	855
chrA03	4736720	4737902	-2.845447137	a	880
chrA07	19102007	19102864	-2.844785382	a	540
chrA02	3364235	3366077	-2.844399713	a	602
chrA07	15026894	15027479	-2.844274991	a	540
chrA02	8387023	8388481	-2.842035242	a	602
chrA04	8729249	8729732	-2.840736646	a	407
chrA05	5483715	5484764	-2.835702941	a	499
chrA01	12441595	12442611	-2.833592807	a	604
chrA06	1582534	1584105	-2.83304073	a	636
chrA02	206229	208214	-2.826906707	a	602
Scaffolds	12699	13778	-2.82407533	a	128
chrA05	22850132	22851035	-2.822139205	a	499
chrA08	9014945	9015911	-2.814860942	a	413
chrA06	23561807	23563218	-2.810796839	a	636
chrA09	14203789	14207615	-2.809733506	a	855
chrA06	26180907	26181860	-2.80750553	a	636
chrA02	10988254	10989665	-2.807027397	a	602
chrA06	7275683	7276826	-2.805702518	a	636
chrA09	29277809	29280749	-2.805529192	a	855
chrA04	4975465	4978219	-2.804775853	a	407
chrA08	21455506	21456810	-2.804637957	a	413
chrA01	27570725	27572379	-2.802826452	a	604
chrA05	5424661	5425147	-2.80260794	a	499
chrA09	32050541	32052364	-2.801344858	a	855
chrA07	14635659	14636199	-2.799644102	a	540
chrA02	13133671	13134343	-2.797635941	a	602
chrA09	13953329	13955030	-2.795777786	a	855
chrA10	2356318	2357515	-2.795123355	a	405
chrA05	13787132	13787606	-2.794615825	a	499
chrA02	5458712	5460144	-2.792303035	a	602
chrA09	22159079	22159661	-2.790684162	a	855
chrA10	11930986	11931418	-2.78770692	a	405
chrA04	18261127	18264703	-2.785521495	a	407
chrA08	1851871	1852474	-2.781588529	a	413
chrA03	2172207	2172630	-2.775768179	a	880
chrA06	14911819	14913079	-2.774051976	a	636
chrA01	9136271	9139270	-2.773097695	a	604
chrA08	15536661	15538367	-2.771418438	a	413
chrA01	18979976	18981647	-2.771002921	a	604
chrA06	18900193	18903363	-2.766678991	a	636
chrA04	15583691	15584930	-2.765011897	a	407
chrA10	13554461	13556889	-2.762389393	a	405
chrA10	13518123	13518660	-2.759381582	a	405
chrA04	11881956	11882739	-2.75888378	a	407
chrA05	2234839	2235538	-2.755431639	a	499
chrA07	11909012	11910901	-2.754795333	a	540
chrA01	21762106	21762289	-2.749518793	a	604
chrA05	23559682	23560713	-2.748055307	a	499
chrA01	4523343	4524931	-2.747380956	a	604
chrA07	15161364	15162528	-2.741139614	a	540
chrA05	5144721	5147006	-2.740686636	a	499
chrA01	6435388	6436955	-2.740531291	a	604
chrA09	765402	766848	-2.739465872	a	855
chrA03	14279409	14279835	-2.738639041	a	880
chrA02	26367274	26367760	-2.738032478	a	602
chrA05	19191823	19194602	-2.737737631	a	499
chrA07	9078463	9079054	-2.735216275	a	540
chrA07	11738195	11741058	-2.727720961	a	540
chrA02	919406	919970	-2.726826188	a	602
chrA07	8182940	8183730	-2.726377261	a	540
chrA06	21286977	21287849	-2.726114282	a	636
chrA06	4840708	4841983	-2.725982836	a	636
chrA03	11716521	11717403	-2.725800458	a	880
chrA01	23244421	23245621	-2.721120618	a	604
chrA05	11526545	11529102	-2.719743319	a	499
chrA03	11835117	11836234	-2.719601183	a	880
chrA02	12474904	12476405	-2.719319562	a	602
chrA08	9155295	9156444	-2.719278457	a	413
chrA06	7404672	7404930	-2.717506793	a	636
chrA03	21250046	21256616	-2.716546738	a	880
chrA10	11688674	11688884	-2.71637713	a	405
chrA06	4791202	4794100	-2.715848576	a	636
chrA01	9057544	9058141	-2.714545127	a	604
chrA02	1620470	1621862	-2.713210623	a	602
chrA10	13914593	13915840	-2.712648989	a	405
chrA09	26436596	26437127	-2.712509497	a	855
chrA08	20852961	20853441	-2.711862226	a	413
chrA06	9229885	9231698	-2.709279232	a	636
chrA07	18644396	18645234	-2.706582054	a	540
chrA09	24715599	24716313	-2.705515341	a	855
chrA09	24937869	24938670	-2.704977471	a	855
chrA05	20476263	20476905	-2.704861991	a	499
chrA08	10202735	10208148	-2.701339125	a	413
chrA01	27947912	27948491	-2.700996328	a	604
chrA06	684714	685245	-2.700828967	a	636
chrA08	17126058	17126760	-2.697238333	a	413
Scaffolds	53631	55924	-2.695704146	a	128
chrA07	22376329	22378163	-2.693441119	a	540
chrA09	33249817	33251885	-2.688700229	a	855
chrA03	24358209	24359793	-2.685743107	a	880
chrA04	569866	570885	-2.683944114	a	407
chrA06	25601581	25602795	-2.676280967	a	636
chrA09	13141686	13143412	-2.674356115	a	855
chrA02	7597440	7602664	-2.672505497	a	602
chrA08	11834895	11837555	-2.672102494	a	413
chrA01	27725052	27727119	-2.670167446	a	604
chrA01	310808	311344	-2.667235751	a	604
chrA09	21890165	21891752	-2.660890388	a	855
chrA09	36839994	36842238	-2.659878213	a	855
chrA04	17462580	17464662	-2.659795392	a	407
chrA10	9834611	9835457	-2.658257108	a	405
chrA09	35848914	35849289	-2.658245796	a	855
chrA01	6657649	6658051	-2.65637802	a	604
chrA07	16178400	16179543	-2.655231604	a	540
chrA01	911430	911958	-2.65171497	a	604
chrA09	23740193	23742554	-2.646935365	a	855
chrA02	8587246	8587737	-2.645997897	a	602
chrA09	22284821	22286124	-2.644580757	a	855
chrA10	14869816	14870020	-2.64102793	a	405
chrA09	7564942	7566706	-2.631196887	a	855
chrA06	5847593	5852904	-2.628548143	a	636
chrA04	16287610	16287859	-2.627076112	a	407
chrA04	16665663	16669147	-2.626286745	a	407
chrA07	5890798	5891602	-2.624162693	a	540
chrA07	22220927	22222481	-2.623957651	a	540
chrA04	9603413	9605470	-2.623443546	a	407
chrA06	10874018	10875639	-2.621208969	a	636
chrA04	16311685	16313603	-2.619647208	a	407
chrA06	22573638	22574940	-2.614320127	a	636
chrA01	9128388	9130652	-2.613819875	a	604
chrA02	18752206	18756528	-2.613345042	a	602
chrA01	739466	740453	-2.611969105	a	604
chrA09	2753529	2754678	-2.609657387	a	855
chrA06	26100210	26101898	-2.607085434	a	636
chrA05	22554797	22556631	-2.60536655	a	499
chrA09	35522186	35523069	-2.605336126	a	855
chrA03	9700465	9700861	-2.605238748	a	880
chrA05	20513236	20514969	-2.600745887	a	499
chrA10	4340597	4340713	-2.600404635	a	405
chrA06	489905	490511	-2.599484201	a	636
chrA10	15151784	15152045	-2.5974195	a	405
chrA02	6735183	6740887	-2.597322095	a	602
chrA05	23803494	23804707	-2.59457685	a	499
Scaffolds	257448	258670	-2.592350418	a	128
chrA08	13570217	13572333	-2.592280515	a	413
chrA04	17631519	17632819	-2.59092758	a	407
chrA03	4651953	4652433	-2.590698192	a	880
chrA06	21473901	21474410	-2.590153924	a	636
chrA03	28034456	28036305	-2.59011951	a	880
chrA03	10194848	10198905	-2.589496835	a	880
chrA10	9319321	9320739	-2.589353789	a	405
chrA08	10226386	10227232	-2.587958702	a	413
chrA01	16359932	16364206	-2.581700062	a	604
chrA08	16473431	16474017	-2.579447177	a	413
chrA09	7045816	7046311	-2.576472469	a	855
chrA08	11625452	11626637	-2.57216331	a	413
chrA01	19517861	19519075	-2.571291565	a	604
chrA03	18672928	18673147	-2.570763926	a	880
chrA09	27647385	27649410	-2.570675605	a	855
chrA06	802674	803825	-2.570248794	a	636
chrA09	29237586	29238882	-2.567417731	a	855
chrA03	27507308	27507512	-2.56546472	a	880
chrA07	13824093	13824615	-2.565440288	a	540
chrA02	27508368	27511280	-2.564452424	a	602
chrA01	9782541	9784553	-2.563828608	a	604
chrA10	4736101	4737149	-2.561695386	a	405
chrA05	5426087	5426888	-2.561616324	a	499
chrA02	7347611	7348007	-2.560581804	a	602
chrA07	15897509	15899158	-2.557608786	a	540
chrA03	20896911	20897920	-2.557125719	a	880
chrA09	36223869	36225285	-2.556178032	a	855
chrA07	12905364	12906144	-2.552071978	a	540
chrA09	24069640	24070552	-2.551197151	a	855
chrA03	27720082	27721252	-2.549081663	a	880
chrA02	21112540	21113295	-2.547855672	a	602
chrA08	12612558	12614571	-2.545842586	a	413
chrA10	1020848	1022058	-2.544009052	a	405
chrA05	20886809	20889452	-2.541818205	a	499
chrA10	4549127	4550045	-2.541505647	a	405
chrA05	22653055	22654983	-2.54074976	a	499
chrA07	12507144	12507552	-2.539279713	a	540
chrA02	14811840	14812077	-2.534841586	a	602
chrA01	26809689	26811280	-2.534366332	a	604
chrA07	17203487	17204162	-2.534145811	a	540
chrA09	5039958	5040906	-2.531230865	a	855
chrA04	16229900	16231190	-2.529934496	a	407
Scaffolds	466765	466942	-2.528595885	a	128
chrA10	12465978	12467492	-2.528085895	a	405
chrA02	6163607	6164777	-2.526096068	a	602
chrA10	10277429	10277993	-2.524336219	a	405
chrA07	17748594	17751400	-2.524112551	a	540
chrA07	3915750	3918283	-2.522691726	a	540
chrA05	7862982	7863462	-2.522416449	a	499
chrA01	16477719	16479274	-2.521157506	a	604
chrA01	4235603	4236058	-2.520291186	a	604
chrA01	2072578	2073103	-2.518855184	a	604
chrA08	7938551	7938791	-2.516008255	a	413
chrA02	5430823	5431636	-2.513463015	a	602
chrA06	21807259	21808394	-2.511997409	a	636
chrA07	20234663	20236034	-2.511738282	a	540
chrA10	16915109	16917442	-2.511230347	a	405
chrA08	13703004	13706421	-2.511172817	a	413
chrA03	16454527	16456872	-2.511152121	a	880
chrA05	20546552	20547983	-2.511121497	a	499
chrA02	12667661	12668015	-2.507913159	a	602
chrA09	256839	259370	-2.507568431	a	855
chrA06	17228338	17228620	-2.506715741	a	636
chrA03	4205310	4206215	-2.502363883	a	880
chrA03	8706381	8707546	-2.501162009	a	880
chrA05	7500068	7506222	-2.499331876	a	499
chrA07	5894708	5895512	-2.498376948	a	540
chrA08	16923484	16924003	-2.497757174	a	413
chrA09	7339539	7340605	-2.496959909	a	855
chrA07	15037229	15038318	-2.496450224	a	540
Scaffolds	396081	397117	-2.494202642	a	128
chrA05	7610285	7611290	-2.492058528	a	499
chrA07	13774283	13775668	-2.490752111	a	540
chrA08	13968774	13969438	-2.490752111	a	413
chrA06	11157554	11158028	-2.487792407	a	636
chrA06	15041721	15041994	-2.487453792	a	636
chrA01	2708975	2711497	-2.486782211	a	604
chrA06	22560562	22563454	-2.4867625	a	636
chrA09	21760150	21761497	-2.486233962	a	855
chrA08	20033879	20035821	-2.486090041	a	413
chrA02	20539415	20541945	-2.482247922	a	602
chrA06	24745795	24746011	-2.481862746	a	636
chrA04	2757404	2759295	-2.481547534	a	407
chrA03	25969907	25970552	-2.481396925	a	880
chrA05	21695138	21696426	-2.480188158	a	499
chrA01	7279698	7280868	-2.479804078	a	604
chrA02	6768784	6769177	-2.47799917	a	602
chrA08	16908067	16910619	-2.477686085	a	413
chrA02	13872915	13873697	-2.474436118	a	602
chrA10	8879459	8880653	-2.472122036	a	405
chrA03	755274	756786	-2.471703309	a	880
Scaffolds	75094	77294	-2.468732438	a	128
chrA06	8407219	8407828	-2.464095126	a	636
chrA10	12827421	12831967	-2.46249798	a	405
chrA04	2100134	2100530	-2.462365446	a	407
chrA07	19300024	19301595	-2.461861831	a	540
chrA03	30542361	30545459	-2.461124485	a	880
chrA09	195583	197430	-2.45946679	a	855
chrA02	8895863	8897263	-2.45807234	a	602
chrA05	15414278	15415233	-2.457171714	a	499
chrA09	6535840	6536758	-2.457105534	a	855
chrA03	19278298	19278610	-2.454715016	a	880
chrA03	14585290	14589032	-2.454173309	a	880
chrA06	22427035	22433062	-2.454135585	a	636
chrA03	22146465	22147737	-2.452201951	a	880
chrA03	26634083	26634272	-2.450002774	a	880
chrA04	3649852	3652592	-2.449775311	a	407
Scaffolds	12233	14471	-2.448335108	a	128
chrA06	25159656	25161307	-2.447087866	a	636
chrA08	4866763	4867318	-2.443683813	a	413
chrA03	17008232	17009507	-2.443622135	a	880
chrA06	24992348	24994688	-2.443621549	a	636
chrA06	17832468	17834427	-2.442005232	a	636
chrA09	3856520	3857216	-2.440998362	a	855
chrA06	14156584	14157281	-2.438833674	a	636
chrA07	11196778	11198080	-2.436290443	a	540
chrA08	14041573	14043048	-2.435688646	a	413
chrA07	20094832	20095150	-2.433556188	a	540
chrA07	22206240	22207909	-2.433556188	a	540
chrA09	31882171	31882399	-2.431901699	a	855
chrA03	4655036	4655516	-2.431791706	a	880
chrA05	20290268	20292626	-2.429845841	a	499
chrA09	25631136	25633786	-2.429029605	a	855
chrA09	31355281	31358338	-2.422546248	a	855
chrA10	13431066	13432509	-2.419751436	a	405
chrA09	35365597	35366566	-2.418828271	a	855
chrA06	21343289	21345381	-2.418153719	a	636
chrA02	17581094	17583056	-2.417809226	a	602
chrA04	15451923	15455804	-2.417734448	a	407
Scaffolds	787804	788620	-2.417463543	a	128
chrA06	4789382	4790668	-2.417022616	a	636
chrA10	2569833	2570136	-2.4166003	a	405
Scaffolds	453844	456415	-2.41649263	a	128
chrA07	20253205	20254918	-2.415054855	a	540
chrA09	13797288	13800708	-2.413206837	a	855
chrA04	16824463	16825138	-2.410969308	a	407
chrA08	6278676	6280559	-2.40957714	a	413
chrA03	28325008	28326390	-2.406548942	a	880
chrA01	941248	942351	-2.405915863	a	604
chrA03	5391021	5392989	-2.405624291	a	880
chrA09	35128562	35129550	-2.405375075	a	855
chrA01	23966250	23967081	-2.404300784	a	604
chrA10	6287791	6288187	-2.40332177	a	405
chrA03	8186582	8188607	-2.403187445	a	880
chrA05	19846518	19846725	-2.402041339	a	499
chrA08	15731601	15732033	-2.400439065	a	413
chrA07	22008426	22010068	-2.392979066	a	540
chrA07	18698854	18700006	-2.39224337	a	540
chrA08	14305693	14305882	-2.391377896	a	413
chrA09	21532365	21533952	-2.39134373	a	855
chrA09	845954	847093	-2.388696858	a	855
chrA09	35368640	35369388	-2.386357441	a	855
chrA06	4719392	4720920	-2.386031182	a	636
chrA02	8572848	8573492	-2.383733567	a	602
chrA07	758643	760980	-2.383574457	a	540
chrA01	21663778	21665032	-2.383523477	a	604
chrA08	16623830	16626611	-2.383061825	a	413
chrA10	17424168	17426828	-2.379815952	a	405
chrA08	1719432	1721500	-2.379489279	a	413
chrA03	8365075	8366305	-2.379221359	a	880
chrA04	18303669	18304437	-2.378894292	a	407
chrA03	19757590	19759703	-2.378428205	a	880
chrA03	17294193	17295283	-2.377556955	a	880
chrA03	18690811	18695100	-2.376803505	a	880
chrA09	28629904	28630186	-2.375350253	a	855
chrA07	4200668	4203431	-2.374508599	a	540
chrA03	29994507	29999934	-2.373153598	a	880
chrA01	9833729	9834809	-2.373057323	a	604
chrA06	1329415	1329724	-2.37109061	a	636
chrA01	12594473	12596446	-2.369139488	a	604
chrA03	22311842	22314709	-2.36658679	a	880
chrA09	5859106	5862772	-2.36271144	a	855
chrA01	10478658	10480266	-2.36106816	a	604
chrA04	886989	888431	-2.360773535	a	407
Scaffolds	211303	214668	-2.359849815	a	128
Scaffolds	563741	565354	-2.358607755	a	128
chrA06	16433436	16433802	-2.358363571	a	636
chrA01	23563929	23565676	-2.358352618	a	604
chrA07	18550429	18552234	-2.357281446	a	540
chrA03	9096590	9097259	-2.356994266	a	880
chrA06	6978668	6979172	-2.355408293	a	636
chrA09	31796944	31798537	-2.354193504	a	855
chrA05	19919275	19920135	-2.353681116	a	499
chrA06	8842618	8843121	-2.352764127	a	636
chrA09	1342372	1343431	-2.351883428	a	855
chrA02	2179540	2180458	-2.351843379	a	602
chrA10	8855851	8856805	-2.348870745	a	405
chrA07	19014089	19014751	-2.348791253	a	540
chrA06	11393910	11395465	-2.348329194	a	636
chrA09	3380302	3383368	-2.3479334	a	855
chrA03	25287118	25290401	-2.347416184	a	880
chrA10	14980627	14981503	-2.347375719	a	405
chrA01	11768817	11772167	-2.345992915	a	604
chrA04	3581369	3583408	-2.345348933	a	407
chrA06	22880929	22882534	-2.34480375	a	636
chrA08	755984	759370	-2.344409338	a	413
chrA03	1498580	1499285	-2.34150662	a	880
chrA05	9896310	9897096	-2.339167898	a	499
chrA09	4303765	4305992	-2.339019508	a	855
chrA06	22790194	22792569	-2.338014591	a	636
chrA10	14564031	14564754	-2.336863935	a	405
chrA01	17596480	17598710	-2.33274206	a	604
chrA02	26270645	26272003	-2.331138522	a	602
chrA09	2650936	2652634	-2.330869216	a	855
chrA03	7078873	7080157	-2.3308539	a	880
chrA03	8183294	8184608	-2.330452368	a	880
chrA02	20853415	20856358	-2.330326476	a	602
chrA08	20789514	20790784	-2.329465195	a	413
chrA06	709094	709913	-2.328637674	a	636
chrA09	20012217	20012715	-2.328456831	a	855
chrA08	1586507	1586984	-2.32780284	a	413
chrA05	18437217	18439988	-2.325930791	a	499
chrA10	11393766	11395392	-2.32504455	a	405
chrA07	8317344	8317791	-2.321562637	a	540
chrA07	16067638	16068755	-2.31759809	a	540
chrA09	32134233	32135353	-2.317100566	a	855
chrA03	18475514	18477789	-2.316849914	a	880
chrA07	10545835	10546601	-2.316824481	a	540
chrA04	15203681	15204527	-2.315057549	a	407
chrA05	7906462	7912671	-2.315057549	a	499
chrA02	4329858	4331414	-2.314058402	a	602
chrA10	15739413	15741341	-2.312475935	a	405
chrA10	1889929	1890384	-2.312294202	a	405
chrA06	17172834	17174997	-2.308417648	a	636
chrA09	30870098	30872069	-2.308226446	a	855
chrA09	25338970	25339417	-2.306797599	a	855
chrA09	31711720	31712137	-2.306348068	a	855
chrA09	22404677	22404977	-2.304434139	a	855
chrA02	27319221	27320055	-2.304230239	a	602
chrA08	12787162	12787592	-2.304230239	a	413
chrA01	18143963	18144698	-2.303441533	a	604
chrA09	11944225	11947000	-2.302923622	a	855
chrA05	12175781	12176075	-2.301974633	a	499
chrA07	17106022	17106965	-2.30160441	a	540
chrA04	15212234	15213831	-2.299506113	a	407
Scaffolds	542953	543793	-2.29935805	a	128
chrA10	5015756	5016327	-2.298719251	a	405
chrA01	14830804	14831785	-2.296894472	a	604
Scaffolds	364454	365623	-2.295241718	a	128
chrA05	22840493	22842248	-2.295108268	a	499
chrA02	3374919	3377131	-2.294875785	a	602
chrA10	11308444	11308761	-2.293207356	a	405
chrA03	17062778	17065204	-2.290595158	a	880
chrA04	8630979	8634375	-2.288708524	a	407
chrA09	33740894	33741700	-2.288633798	a	855
chrA02	12779129	12782876	-2.287855312	a	602
chrA01	8284321	8287253	-2.285661028	a	604
chrA03	8403634	8404861	-2.284326699	a	880
chrA07	4643230	4646047	-2.27970546	a	540
chrA09	33346043	33347655	-2.278065061	a	855
chrA06	14274696	14276202	-2.277854853	a	636
chrA05	7426669	7428607	-2.277325259	a	499
chrA05	23547948	23549076	-2.276796966	a	499
chrA10	15088358	15088583	-2.276282679	a	405
chrA03	17629293	17630130	-2.275868329	a	880
chrA01	25053359	25055182	-2.275737232	a	604
chrA08	12303768	12305849	-2.275667451	a	413
chrA07	9905718	9906381	-2.275623576	a	540
chrA01	3772501	3773881	-2.274291717	a	604
Scaffolds	17437	22625	-2.273194925	a	128
chrA02	5555264	5556304	-2.272293792	a	602
chrA09	21326913	21329604	-2.271880147	a	855
chrA07	22203943	22205473	-2.271569657	a	540
chrA02	22334451	22337137	-2.270617949	a	602
chrA02	3205102	3206473	-2.270009816	a	602
chrA04	16817676	16818459	-2.26979779	a	407
chrA10	1746046	1748914	-2.269371131	a	405
chrA05	158704	161209	-2.268463713	a	499
Scaffolds	119285	120336	-2.26781081	a	128
chrA06	17863	19574	-2.267801867	a	636
chrA09	4138010	4139540	-2.264789664	a	855
chrA02	11752868	11759645	-2.263885201	a	602
chrA02	24552834	24555844	-2.262318254	a	602
chrA06	10276601	10277582	-2.259831385	a	636
chrA01	7074075	7076592	-2.259805247	a	604
chrA09	30931767	30933609	-2.258830412	a	855
chrA02	7797194	7797903	-2.258396942	a	602
chrA02	3107706	3109635	-2.25712767	a	602
chrA02	6697568	6699224	-2.256573461	a	602
chrA05	7627627	7628774	-2.254950879	a	499
chrA03	19137241	19139063	-2.253972987	a	880
chrA09	7301007	7302066	-2.251990473	a	855
chrA01	24405494	24406169	-2.249775137	a	604
chrA10	15886491	15890315	-2.249516335	a	405
chrA09	15960489	15963695	-2.249070342	a	855
chrA08	17098365	17102802	-2.248360247	a	413
chrA01	19902059	19902998	-2.24799548	a	604
chrA09	288451	290986	-2.246197822	a	855
chrA09	8322786	8323798	-2.245242402	a	855
chrA03	20514083	20514281	-2.244968709	a	880
chrA04	7153640	7154745	-2.24383563	a	407
chrA10	16351999	16355771	-2.243300787	a	405
chrA07	3332988	3334309	-2.24055626	a	540
chrA01	6333907	6337128	-2.239174614	a	604
chrA03	11517546	11517945	-2.238863348	a	880
chrA02	6573524	6573782	-2.238543134	a	602
chrA09	20999590	21001116	-2.238418123	a	855
chrA07	20393649	20394562	-2.238355898	a	540
chrA01	1234347	1234827	-2.238252313	a	604
chrA08	15064781	15069482	-2.237098127	a	413
chrA07	19934865	19937098	-2.234873539	a	540
chrA01	6913791	6916448	-2.234308293	a	604
chrA04	10044647	10045205	-2.233083878	a	407
chrA09	387190	389910	-2.230947879	a	855
chrA09	4118490	4121302	-2.229702031	a	855
chrA09	12448170	12448860	-2.22893568	a	855
chrA09	5980340	5981843	-2.2280936	a	855
chrA06	7441407	7442701	-2.227088434	a	636
chrA07	15266957	15269906	-2.225532988	a	540
chrA09	31591895	31592150	-2.224961452	a	855
chrA03	11664559	11666609	-2.224944497	a	880
chrA03	15834948	15837784	-2.223019242	a	880
chrA07	13512924	13514067	-2.219587409	a	540
chrA04	600622	601972	-2.218619324	a	407
chrA09	8345105	8347948	-2.217785003	a	855
chrA09	2539294	2539777	-2.217123362	a	855
chrA05	10630896	10631112	-2.21658416	a	499
chrA07	20272603	20274593	-2.21603648	a	540
chrA01	17945074	17948097	-2.215910827	a	604
chrA04	2155582	2156047	-2.214219036	a	407
chrA09	1278338	1280619	-2.214167644	a	855
chrA06	23646551	23647604	-2.213344382	a	636
chrA06	18742048	18744098	-2.211706495	a	636
chrA02	21659761	21661525	-2.20994459	a	602
chrA02	11602130	11603684	-2.208121534	a	602
chrA04	12452838	12453492	-2.207603284	a	407
chrA03	30307510	30307879	-2.206927915	a	880
Scaffolds	338437	342376	-2.206783259	a	128
Scaffolds	259296	261553	-2.205665376	a	128
chrA08	19729675	19731255	-2.205016207	a	413
chrA02	21525044	21525605	-2.20496255	a	602
chrA04	15164298	15165363	-2.202019301	a	407
chrA09	11735414	11737943	-2.201922954	a	855
chrA06	4743350	4746644	-2.201655172	a	636
chrA06	22624326	22626890	-2.201377581	a	636
chrA09	35743150	35743471	-2.201358649	a	855
chrA09	32316634	32316841	-2.199809939	a	855
chrA07	20329777	20334974	-2.199432276	a	540
chrA02	631024	633620	-2.199248868	a	602
chrA09	36266102	36268538	-2.198578813	a	855
chrA03	27716918	27718226	-2.197588662	a	880
chrA06	13287220	13287619	-2.196712575	a	636
chrA04	467704	468768	-2.195345326	a	407
chrA05	17698944	17699847	-2.1950616	a	499
chrA01	10230101	10230344	-2.192893541	a	604
chrA05	8105908	8106355	-2.192820738	a	499
chrA06	24048705	24049275	-2.192221018	a	636
chrA09	36816476	36816686	-2.190885992	a	855
chrA04	2098239	2098941	-2.190748121	a	407
chrA09	13296610	13297526	-2.187054734	a	855
chrA03	1318579	1324377	-2.186796076	a	880
chrA02	3490337	3491914	-2.186293493	a	602
chrA06	8160851	8161724	-2.183041723	a	636
chrA02	11751296	11751557	-2.182403289	a	602
chrA07	21107649	21108057	-2.181737466	a	540
chrA07	16245644	16246916	-2.180402615	a	540
chrA05	526906	529665	-2.180155694	a	499
chrA06	18520752	18521810	-2.179854553	a	636
chrA03	25133878	25135765	-2.176098435	a	880
chrA04	14186649	14190780	-2.175585656	a	407
chrA05	23808836	23812598	-2.175293591	a	499
chrA04	8146825	8152836	-2.174856618	a	407
chrA06	482987	483466	-2.172666924	a	636
Scaffolds	430612	432005	-2.170684365	a	128
chrA03	8044231	8045032	-2.16955741	a	880
chrA10	10426019	10426553	-2.16697041	a	405
chrA03	22721730	22723263	-2.166862416	a	880
chrA09	28074305	28076356	-2.164889137	a	855
chrA01	12108247	12110609	-2.164506579	a	604
chrA06	24137574	24138789	-2.164388648	a	636
chrA05	22235302	22235644	-2.164177211	a	499
chrA02	26008796	26012354	-2.164156647	a	602
chrA06	13688079	13691392	-2.16337614	a	636
chrA06	26095124	26097370	-2.162171795	a	636
chrA09	31660790	31661659	-2.161080093	a	855
chrA02	27071015	27071930	-2.161061326	a	602
chrA01	27459176	27460374	-2.161037435	a	604
chrA09	32863293	32866289	-2.159721603	a	855
chrA06	995015	996325	-2.158989973	a	636
chrA06	7020885	7022267	-2.158918364	a	636
chrA06	16242619	16242829	-2.15786228	a	636
chrA05	5412313	5414298	-2.156526722	a	499
chrA09	30094361	30094793	-2.15477463	a	855
chrA05	6186911	6188476	-2.153446374	a	499
chrA02	18669873	18670086	-2.152548807	a	602
chrA01	27258746	27259280	-2.151888475	a	604
chrA09	4296543	4299567	-2.151766283	a	855
chrA06	14183379	14184998	-2.151545998	a	636
chrA06	24550740	24552478	-2.149513823	a	636
chrA08	19545313	19547908	-2.149480661	a	413
chrA09	9348331	9348862	-2.145934523	a	855
chrA03	21731332	21731803	-2.145610623	a	880
chrA01	2951675	2953056	-2.143089194	a	604
chrA08	2217042	2219382	-2.139250221	a	413
chrA07	16366355	16368040	-2.138215195	a	540
chrA09	8211313	8214352	-2.138184582	a	855
chrA06	22527660	22528506	-2.136672812	a	636
chrA03	17563382	17564688	-2.135289587	a	880
chrA05	9742031	9743613	-2.134970818	a	499
chrA10	6582135	6585772	-2.134258593	a	405
chrA02	22395462	22401919	-2.133888402	a	602
chrA09	18312929	18314363	-2.133043589	a	855
Scaffolds	6065	8661	-2.130460096	a	128
chrA06	18720271	18720727	-2.12604097	a	636
chrA03	10062357	10063230	-2.125519732	a	880
chrA01	13954080	13955829	-2.124401927	a	604
chrA09	32366598	32367772	-2.124142742	a	855
chrA10	1208665	1210768	-2.124129537	a	405
chrA02	10278174	10279041	-2.123875075	a	602
chrA09	12620755	12622943	-2.122424006	a	855
chrA08	16558963	16559767	-2.120886518	a	413
chrA07	11749116	11752082	-2.120087074	a	540
chrA05	21850765	21851710	-2.119140477	a	499
chrA01	2755303	2757345	-2.116252583	a	604
chrA03	14330234	14332133	-2.115746714	a	880
chrA01	15720246	15722143	-2.115509436	a	604
chrA05	23237056	23240554	-2.114782758	a	499
chrA02	305369	307397	-2.114683003	a	602
chrA01	845420	847871	-2.114103555	a	604
chrA07	17888868	17889777	-2.113584409	a	540
chrA06	1610304	1613371	-2.111394882	a	636
chrA06	26215102	26216058	-2.111131907	a	636
chrA05	19270359	19271877	-2.110780378	a	499
chrA01	7772055	7774760	-2.110448368	a	604
chrA09	435639	437478	-2.108909516	a	855
Scaffolds	95586	98232	-2.107013235	a	128
chrA10	15003551	15004709	-2.106298908	a	405
chrA02	10700298	10702097	-2.105928843	a	602
chrA02	4396574	4396856	-2.105888319	a	602
chrA05	1365802	1367275	-2.105762932	a	499
chrA08	14592947	14596050	-2.105038177	a	413
chrA01	9802984	9803774	-2.104478557	a	604
chrA04	2124503	2125665	-2.104477408	a	407
chrA09	26735235	26736820	-2.104145385	a	855
chrA02	26296662	26297969	-2.10367267	a	602
chrA06	11973976	11978025	-2.101818332	a	636
chrA09	35458092	35459228	-2.101556609	a	855
chrA07	18638185	18639116	-2.100311332	a	540
chrA02	1612400	1612622	-2.09974998	a	602
chrA03	17611109	17612327	-2.099319664	a	880
chrA07	12914829	12916136	-2.097581314	a	540
chrA03	25779910	25785236	-2.096007991	a	880
chrA03	23250796	23251198	-2.095048849	a	880
chrA03	11811365	11812208	-2.095004834	a	880
chrA06	21903228	21905561	-2.094705961	a	636
Scaffolds	143743	145376	-2.094660694	a	128
chrA04	17864236	17864971	-2.094490758	a	407
chrA03	14580682	14582197	-2.093413355	a	880
chrA01	6744917	6745751	-2.091938284	a	604
chrA08	14925552	14926256	-2.091938284	a	413
chrA05	10609325	10610062	-2.089965347	a	499
chrA10	8888755	8890404	-2.088255917	a	405
chrA09	2033804	2034155	-2.087970195	a	855
Scaffolds	158222	160531	-2.08791466	a	128
chrA09	25044848	25050410	-2.08773969	a	855
chrA09	33629846	33631252	-2.086415148	a	855
chrA06	18799867	18803185	-2.085787443	a	636
chrA06	23051567	23053719	-2.085320359	a	636
chrA02	22840466	22841724	-2.085105568	a	602
chrA03	24075919	24079253	-2.084040044	a	880
chrA01	10066499	10067268	-2.083260892	a	604
chrA02	22852370	22853996	-2.083068742	a	602
chrA03	19767224	19768390	-2.082752585	a	880
chrA02	6168982	6170699	-2.082150863	a	602
chrA05	15321745	15321976	-2.080388036	a	499
chrA08	14642383	14644264	-2.080388036	a	413
chrA07	3530371	3533304	-2.080344794	a	540
chrA01	1707063	1709535	-2.080171325	a	604
chrA04	8673586	8674615	-2.078944658	a	407
chrA09	31211633	31212752	-2.078922643	a	855
chrA01	3836640	3838285	-2.078141395	a	604
chrA08	8577411	8580696	-2.077790917	a	413
chrA09	12738556	12739486	-2.077457854	a	855
chrA01	9809543	9810711	-2.076210634	a	604
chrA03	2377783	2379106	-2.074507862	a	880
chrA09	1235779	1236115	-2.074357289	a	855
chrA05	21545299	21547144	-2.073996925	a	499
chrA03	12573384	12574658	-2.07150397	a	880
chrA10	6550343	6551603	-2.071425723	a	405
chrA08	20640096	20642328	-2.070678584	a	413
chrA05	10434343	10436713	-2.065890009	a	499
chrA09	2291683	2292142	-2.063660815	a	855
chrA01	1252221	1253552	-2.061834522	a	604
chrA07	8055506	8056036	-2.061357511	a	540
chrA09	31206910	31207786	-2.060548741	a	855
chrA01	15041966	15045819	-2.05912693	a	604
chrA08	2881642	2882609	-2.059124765	a	413
chrA09	23884043	23885198	-2.058485429	a	855
chrA07	6147572	6148661	-2.05705958	a	540
chrA09	16086367	16087580	-2.056900324	a	855
chrA08	15584694	15585264	-2.055957141	a	413
chrA07	15320366	15322942	-2.055615886	a	540
chrA06	15053949	15057886	-2.055330363	a	636
chrA07	22477907	22478411	-2.055167051	a	540
chrA06	5673057	5673733	-2.05348908	a	636
chrA09	26515015	26515433	-2.05308296	a	855
chrA10	9083708	9086058	-2.052124174	a	405
chrA07	22534515	22535252	-2.051444133	a	540
chrA09	572303	572684	-2.050548688	a	855
chrA06	24946264	24949101	-2.050275968	a	636
chrA03	2579603	2581990	-2.05027446	a	880
chrA09	3680135	3680573	-2.049813935	a	855
chrA07	18830955	18833000	-2.04949053	a	540
chrA01	3482553	3486199	-2.049340979	a	604
chrA07	15864222	15864988	-2.048291432	a	540
chrA03	24009494	24010244	-2.047550285	a	880
chrA02	16779477	16781832	-2.046459243	a	602
chrA10	571809	574140	-2.04463855	a	405
chrA07	20439120	20442056	-2.042761926	a	540
chrA06	503112	505504	-2.042569957	a	636
chrA03	22775480	22780937	-2.042059522	a	880
chrA06	6151847	6152728	-2.041376567	a	636
chrA09	25190160	25190918	-2.039903018	a	855
chrA09	15598828	15600849	-2.039539964	a	855
chrA03	23251869	23253847	-2.039183671	a	880
chrA05	680765	681158	-2.037750083	a	499
chrA05	7261653	7262680	-2.03750986	a	499
chrA03	224717	225219	-2.03586979	a	880
chrA07	6612964	6613471	-2.035518522	a	540
chrA03	132014	133666	-2.034560736	a	880
chrA03	15515291	15517053	-2.033962466	a	880
chrA06	15169076	15169925	-2.03358081	a	636
chrA07	1287463	1288459	-2.032138535	a	540
chrA10	9797093	9798099	-2.031883273	a	405
chrA02	2802486	2803426	-2.029133458	a	602
chrA01	2166148	2167750	-2.027767952	a	604
chrA02	24376391	24381465	-2.026886692	a	602
chrA07	18209454	18209742	-2.026037	a	540
chrA07	1591997	1594848	-2.02493135	a	540
chrA02	862430	863529	-2.023678718	a	602
chrA06	474067	475749	-2.023202998	a	636
chrA06	3931869	3932839	-2.022995893	a	636
chrA07	18710391	18712436	-2.0226275	a	540
chrA06	849543	850814	-2.020998862	a	636
chrA03	30707963	30708812	-2.020607015	a	880
chrA01	21474477	21475887	-2.019902511	a	604
chrA01	4818429	4820211	-2.019795514	a	604
chrA09	22143375	22144203	-2.019531235	a	855
chrA02	10342535	10344098	-2.019465623	a	602
chrA02	21551695	21552549	-2.019366682	a	602
chrA07	10631132	10632518	-2.019117724	a	540
chrA07	88233	89597	-2.018206201	a	540
chrA06	1566663	1569279	-2.018202745	a	636
chrA09	28340737	28341585	-2.017825058	a	855
chrA08	19786937	19788324	-2.01634734	a	413
chrA09	34997484	34999359	-2.01500768	a	855
chrA05	22937739	22938384	-2.01428967	a	499
chrA10	7171148	7176314	-2.01400505	a	405
chrA07	22174616	22174853	-2.011112315	a	540
chrA02	10431950	10432568	-2.010879317	a	602
chrA09	1339315	1340296	-2.008404402	a	855
chrA02	10968966	10969980	-2.007549639	a	602
chrA09	14380909	14382117	-2.006219321	a	855
chrA10	9736804	9740410	-2.006219321	a	405
chrA10	15035723	15039183	-2.006100528	a	405
chrA03	766286	770013	-2.005501259	a	880
chrA06	18245177	18246114	-2.004452911	a	636
chrA04	14158899	14160343	-2.003516262	a	407
chrA08	12538058	12540050	-2.003421497	a	413
chrA02	12010012	12010503	-2.003325949	a	602
chrA02	1452226	1453111	-2.003184897	a	602
chrA09	34846470	34849845	-2.003001254	a	855
chrA09	35324997	35327281	-2.00284873	a	855
chrA04	3283508	3286114	-2.002425599	a	407
chrA10	16438337	16438730	-2.001209891	a	405
chrA01	713088	715090	-2.000958121	a	604
chrA03	7883561	7884799	-2.000424294	a	880
chrA02	1082883	1083513	-1.998800586	b	602
chrA01	23669873	23670788	-1.995043232	b	604
chrA06	6738404	6739178	-1.994892671	b	636
chrA10	8038180	8041942	-1.994405276	b	405
chrA05	23312487	23313276	-1.994089174	b	499
chrA09	5022598	5023808	-1.993366963	b	855
chrA10	10864004	10865523	-1.992722859	b	405
chrA04	10159162	10160470	-1.99260999	b	407
chrA01	1932360	1934224	-1.992062775	b	604
chrA02	26811315	26813192	-1.991050307	b	602
chrA04	4217832	4218158	-1.990691022	b	407
chrA04	14804974	14806818	-1.990527707	b	407
chrA06	13906140	13909715	-1.990365759	b	636
chrA06	8759072	8759765	-1.990263369	b	636
chrA04	2176684	2179024	-1.990181054	b	407
chrA07	4172346	4173601	-1.989689265	b	540
chrA02	27093006	27093399	-1.987877736	b	602
chrA07	7867645	7867966	-1.987484458	b	540
chrA04	5961043	5962351	-1.987228668	b	407
chrA04	11711133	11713172	-1.983995244	b	407
chrA07	10649690	10651184	-1.982397623	b	540
chrA02	26586014	26587974	-1.981294012	b	602
chrA07	14441354	14442721	-1.980810786	b	540
chrA03	22071116	22074263	-1.980474437	b	880
chrA06	4967676	4971509	-1.979737103	b	636
chrA03	8352405	8352876	-1.979259252	b	880
chrA09	5129458	5130175	-1.979259252	b	855
chrA09	26568255	26569393	-1.978280694	b	855
chrA07	10125014	10125437	-1.978014534	b	540
chrA06	5661668	5662751	-1.97737541	b	636
chrA09	15393473	15394052	-1.977347868	b	855
chrA09	27830140	27831939	-1.97695194	b	855
chrA06	24385058	24385715	-1.976809188	b	636
chrA09	19837581	19837815	-1.975295603	b	855
chrA02	8114069	8116985	-1.97503024	b	602
chrA06	24564238	24565054	-1.974466282	b	636
chrA10	12140840	12141632	-1.972444544	b	405
chrA10	8374648	8375042	-1.970633114	b	405
chrA04	7729910	7733262	-1.970426272	b	407
chrA04	15906548	15906776	-1.970258129	b	407
chrA02	25464855	25468006	-1.9701522	b	602
chrA04	8724537	8727431	-1.969583415	b	407
chrA03	2714294	2715717	-1.969149554	b	880
chrA05	4559598	4561161	-1.967694278	b	499
chrA04	15378726	15381200	-1.967550735	b	407
chrA01	23632691	23633960	-1.966027538	b	604
chrA05	19536176	19536890	-1.965274992	b	499
chrA01	21213030	21213669	-1.964598516	b	604
chrA07	8313958	8314941	-1.963042502	b	540
chrA08	19517123	19517495	-1.962891389	b	413
chrA06	18600226	18603458	-1.961478888	b	636
chrA10	14544086	14545788	-1.961096447	b	405
chrA09	17614027	17616892	-1.959415059	b	855
chrA09	2173458	2175116	-1.95788431	b	855
chrA08	13773800	13775913	-1.957035747	b	413
chrA06	6591518	6592774	-1.956094305	b	636
chrA09	23104019	23104371	-1.953894382	b	855
chrA09	33555337	33555992	-1.953365063	b	855
chrA01	6135909	6137165	-1.951409284	b	604
chrA01	28008692	28009780	-1.951134554	b	604
chrA06	9873138	9873951	-1.950603902	b	636
chrA10	14212176	14213298	-1.950565969	b	405
chrA07	1299738	1300773	-1.95054897	b	540
chrA06	8557316	8558911	-1.950131488	b	636
chrA06	21540913	21544704	-1.949664115	b	636
chrA02	7584206	7586825	-1.948825087	b	602
chrA09	8872804	8873290	-1.948718376	b	855
chrA10	4664564	4668085	-1.948630757	b	405
chrA04	9237372	9239120	-1.948336215	b	407
chrA03	27820616	27821909	-1.947801025	b	880
chrA09	844122	845193	-1.947455722	b	855
chrA10	14156242	14157479	-1.94712885	b	405
chrA10	5777224	5777835	-1.946564622	b	405
chrA08	2645558	2645750	-1.943162921	b	413
chrA09	24005353	24005886	-1.942501343	b	855
chrA05	3443972	3444649	-1.942410649	b	499
chrA04	11356229	11357233	-1.942382548	b	407
chrA01	2151393	2151767	-1.942015095	b	604
chrA02	4921838	4923430	-1.941663833	b	602
chrA03	11515823	11516234	-1.941405188	b	880
chrA02	27629363	27630071	-1.94118423	b	602
chrA01	16342604	16346839	-1.939808153	b	604
chrA02	23648954	23651176	-1.938736732	b	602
chrA03	9693172	9696706	-1.938510003	b	880
chrA06	22434748	22437915	-1.938351208	b	636
chrA06	17359093	17360338	-1.938196383	b	636
chrA08	18050116	18050683	-1.937695567	b	413
chrA01	23791308	23791811	-1.937651923	b	604
chrA01	13185336	13187843	-1.937148022	b	604
chrA01	27153739	27154612	-1.935029086	b	604
chrA04	15845586	15847208	-1.934642658	b	407
chrA01	24713319	24714438	-1.934204509	b	604
chrA07	6143276	6144710	-1.933830878	b	540
chrA02	27220459	27223449	-1.933337549	b	602
chrA04	13204034	13205206	-1.932134938	b	407
chrA05	21558010	21560035	-1.930850826	b	499
chrA09	24933452	24936208	-1.93028238	b	855
chrA04	3536172	3538616	-1.929868181	b	407
chrA06	3975933	3977016	-1.929261136	b	636
chrA01	10625665	10630186	-1.927791985	b	604
chrA08	19519186	19521880	-1.927750036	b	413
chrA03	26967437	26973023	-1.927474474	b	880
chrA04	6065827	6066682	-1.927363027	b	407
chrA03	22397478	22399700	-1.927044666	b	880
chrA03	8185258	8185811	-1.925946135	b	880
chrA10	8692934	8694778	-1.925417764	b	405
chrA06	10117961	10119512	-1.92494746	b	636
chrA03	9163174	9164545	-1.924009865	b	880
chrA07	6846915	6849709	-1.923781365	b	540
chrA02	4006510	4007116	-1.923473987	b	602
chrA07	16277330	16277603	-1.922258099	b	540
chrA03	1628238	1629362	-1.92127814	b	880
chrA05	22363935	22365643	-1.916906837	b	499
chrA06	24194385	24194841	-1.916178654	b	636
chrA06	9196664	9196925	-1.914595261	b	636
chrA09	6791408	6793030	-1.913185422	b	855
chrA09	23861822	23862980	-1.912636583	b	855
chrA06	21076554	21080826	-1.912493599	b	636
chrA04	7193130	7193865	-1.912331801	b	407
chrA05	3728058	3728960	-1.912324502	b	499
chrA03	3837305	3840347	-1.91221566	b	880
chrA03	26334959	26338055	-1.91213811	b	880
chrA08	10115986	10117579	-1.910966389	b	413
chrA01	3285871	3286570	-1.910691121	b	604
chrA03	12525133	12526947	-1.909348291	b	880
chrA06	25679538	25680030	-1.909348291	b	636
chrA03	21503178	21504255	-1.909263479	b	880
chrA09	1599721	1601288	-1.908991411	b	855
chrA09	33429682	33431938	-1.908868746	b	855
chrA01	3306805	3307815	-1.908401127	b	604
chrA09	22745580	22746000	-1.906284835	b	855
chrA09	7074295	7075586	-1.905571868	b	855
chrA05	15748710	15748902	-1.90532296	b	499
chrA02	11218117	11218402	-1.90276581	b	602
chrA04	7230297	7230864	-1.902365566	b	407
chrA09	32365225	32365636	-1.902363934	b	855
chrA07	18127394	18127826	-1.900811326	b	540
chrA07	21489421	21490132	-1.900561561	b	540
chrA02	15398160	15400287	-1.899934614	b	602
chrA09	8842875	8844197	-1.899816642	b	855
chrA08	20770580	20772609	-1.897889257	b	413
chrA03	2874043	2875101	-1.897849288	b	880
chrA05	21887697	21887991	-1.896906847	b	499
chrA09	30366278	30366704	-1.895277982	b	855
chrA10	10843493	10844645	-1.895129418	b	405
chrA02	22078981	22079549	-1.894994076	b	602
chrA08	2425125	2425882	-1.894958976	b	413
chrA03	26506023	26508324	-1.89451828	b	880
chrA07	18460023	18460719	-1.894194739	b	540
chrA08	11831116	11833718	-1.893977753	b	413
chrA05	3001697	3002723	-1.893874944	b	499
chrA01	6431263	6431725	-1.893377971	b	604
chrA10	15706051	15707319	-1.892269507	b	405
chrA02	3703838	3705388	-1.89225934	b	602
chrA03	30139931	30142402	-1.891636356	b	880
chrA04	14294259	14296167	-1.891171742	b	407
chrA10	9596915	9597665	-1.890532442	b	405
chrA09	27367719	27369063	-1.890444572	b	855
chrA02	16277505	16278297	-1.889530726	b	602
chrA09	22412841	22414482	-1.888907094	b	855
chrA07	9619772	9621242	-1.888678508	b	540
chrA07	14508690	14510652	-1.885438997	b	540
chrA07	18892732	18899636	-1.88315551	b	540
chrA05	12594108	12594946	-1.883093211	b	499
chrA02	845955	848280	-1.881641677	b	602
chrA03	26494408	26494720	-1.88150231	b	880
chrA01	2515303	2518998	-1.880081633	b	604
chrA05	7207012	7208938	-1.878765393	b	499
chrA04	4115628	4116255	-1.878710839	b	407
chrA09	32332834	32334124	-1.878689424	b	855
chrA03	12540396	12541232	-1.878442525	b	880
chrA02	7358162	7360237	-1.877878655	b	602
chrA03	24353975	24354449	-1.877419501	b	880
chrA06	15038137	15038820	-1.877227864	b	636
chrA03	69663	71190	-1.876638385	b	880
chrA03	20641316	20643571	-1.875852029	b	880
chrA08	21459146	21460575	-1.874839108	b	413
chrA06	23447272	23448731	-1.873616463	b	636
chrA05	18286117	18286768	-1.87285471	b	499
chrA04	16745770	16747893	-1.871334479	b	407
chrA09	24365282	24365569	-1.87058176	b	855
chrA10	13383082	13383547	-1.868871207	b	405
chrA05	4067079	4068219	-1.868821019	b	499
chrA02	370419	370680	-1.866534633	b	602
chrA02	3936507	3937480	-1.86521372	b	602
chrA03	22896983	22898846	-1.865097975	b	880
chrA03	23480790	23482034	-1.863160301	b	880
chrA03	24530127	24531249	-1.862794572	b	880
chrA01	16753154	16755188	-1.861614356	b	604
chrA04	18302017	18302761	-1.861470463	b	407
chrA08	14505383	14507064	-1.860560693	b	413
chrA01	7203822	7204195	-1.860219566	b	604
chrA09	2575122	2575530	-1.858663456	b	855
chrA10	9046550	9047033	-1.857657763	b	405
chrA03	6981211	6981790	-1.857623921	b	880
chrA03	24563623	24566671	-1.857349241	b	880
chrA09	32717606	32720004	-1.85695938	b	855
chrA01	20790838	20793506	-1.854997565	b	604
chrA07	209636	211394	-1.85265063	b	540
chrA07	10263249	10263969	-1.852188629	b	540
chrA03	27898210	27899435	-1.851429599	b	880
chrA08	21285761	21287303	-1.849931534	b	413
chrA07	21000970	21003847	-1.849227648	b	540
chrA05	8292156	8292657	-1.848167602	b	499
chrA07	224092	228427	-1.845638126	b	540
chrA04	18556237	18557164	-1.84173591	b	407
chrA02	7381018	7383241	-1.841168396	b	602
chrA03	23915875	23917554	-1.841052034	b	880
chrA04	4056831	4057215	-1.840390271	b	407
chrA09	4206162	4207478	-1.840073572	b	855
chrA05	18999274	19002696	-1.83976522	b	499
chrA09	7256083	7257437	-1.838014044	b	855
chrA02	25170208	25176046	-1.837491049	b	602
chrA03	1199576	1204747	-1.83687653	b	880
chrA05	1268779	1270895	-1.835214598	b	499
chrA06	3703372	3705387	-1.833984884	b	636
chrA06	14696012	14696927	-1.833726851	b	636
chrA04	12731348	12732755	-1.833670608	b	407
chrA10	8314198	8315278	-1.832498578	b	405
chrA03	27678203	27681509	-1.831722998	b	880
chrA09	13738745	13740342	-1.829698667	b	855
chrA03	28126434	28127827	-1.828921528	b	880
chrA06	18285187	18286771	-1.828579991	b	636
chrA06	21290143	21291971	-1.828400525	b	636
chrA01	2868581	2869908	-1.827603175	b	604
chrA10	7215799	7216888	-1.827260048	b	405
chrA09	8360554	8368116	-1.825473018	b	855
chrA07	16038903	16039723	-1.825342288	b	540
chrA10	8185097	8187134	-1.824625305	b	405
chrA03	10464082	10468624	-1.82421786	b	880
chrA08	2687895	2689299	-1.823585299	b	413
chrA06	1018647	1019236	-1.822646024	b	636
chrA09	1931409	1939577	-1.822603421	b	855
chrA05	3190452	3192521	-1.822422648	b	499
chrA08	11234584	11236180	-1.82206348	b	413
chrA05	19459016	19459397	-1.821802228	b	499
chrA03	26548518	26549644	-1.82160108	b	880
chrA10	13723506	13724319	-1.820525112	b	405
chrA10	1345182	1346995	-1.820516683	b	405
chrA08	20781036	20787027	-1.82045279	b	413
chrA01	26650428	26651802	-1.819935372	b	604
chrA02	1442109	1443219	-1.819804477	b	602
chrA01	8410291	8412205	-1.818404554	b	604
chrA05	22477596	22478541	-1.818303164	b	499
chrA03	11036837	11037863	-1.816793222	b	880
chrA10	15754650	15759187	-1.814738284	b	405
chrA04	4382763	4383144	-1.814123046	b	407
chrA08	6793763	6798431	-1.812305186	b	413
chrA03	5733560	5742729	-1.812239121	b	880
chrA08	19057962	19063200	-1.811801373	b	413
chrA02	4736657	4738751	-1.81158289	b	602
chrA01	24550300	24551956	-1.811034277	b	604
chrA05	8266412	8271002	-1.810440807	b	499
chrA08	19401148	19401553	-1.810092701	b	413
chrA04	16265812	16270118	-1.809926637	b	407
chrA02	15661188	15662739	-1.80979366	b	602
chrA06	26185326	26187528	-1.809257395	b	636
chrA03	10029774	10031174	-1.807942006	b	880
chrA01	608219	609631	-1.80765541	b	604
chrA01	6208761	6210656	-1.80652754	b	604
chrA10	859436	861942	-1.805603001	b	405
chrA09	14475023	14475882	-1.804582477	b	855
chrA07	11554910	11556093	-1.804524671	b	540
chrA08	5678827	5679667	-1.802946136	b	413
chrA05	5228664	5229932	-1.802309065	b	499
chrA09	35304348	35305062	-1.80127457	b	855
chrA03	3237222	3239038	-1.80094125	b	880
chrA03	3833130	3835752	-1.798933943	b	880
chrA09	33616282	33617538	-1.797043636	b	855
chrA06	6531984	6535874	-1.796691195	b	636
chrA02	23283672	23284486	-1.796050899	b	602
chrA01	16137127	16138876	-1.795952968	b	604
chrA06	21674599	21677814	-1.795849511	b	636
chrA05	2998182	3000757	-1.794554281	b	499
chrA04	6311836	6318931	-1.794132217	b	407
chrA01	27649578	27652698	-1.793998158	b	604
chrA03	15025522	15028954	-1.793975005	b	880
chrA03	3345381	3349188	-1.792516407	b	880
chrA02	16212470	16215648	-1.792312587	b	602
chrA01	450015	451503	-1.78926772	b	604
chrA03	23642895	23646699	-1.788519472	b	880
chrA07	18992288	18992768	-1.788500471	b	540
chrA03	13299406	13300058	-1.787583389	b	880
chrA06	23572614	23574499	-1.787580525	b	636
chrA10	8872900	8873137	-1.787167805	b	405
chrA02	27225116	27226162	-1.787080947	b	602
chrA09	15584062	15584536	-1.785973943	b	855
chrA01	11324457	11326918	-1.785781375	b	604
chrA03	24229585	24230017	-1.785559044	b	880
chrA09	8316902	8321799	-1.785491386	b	855
chrA01	11860553	11860847	-1.783782966	b	604
chrA09	28362679	28368058	-1.782554534	b	855
chrA04	5867848	5872379	-1.782375155	b	407
chrA06	22166658	22169758	-1.782057942	b	636
chrA08	18392436	18394300	-1.781965156	b	413
chrA09	36618695	36620272	-1.781729888	b	855
chrA07	15401638	15404813	-1.779722032	b	540
chrA02	13048468	13049116	-1.779561173	b	602
chrA06	24256019	24261246	-1.779309093	b	636
chrA01	14632694	14633594	-1.778827629	b	604
chrA09	33486600	33487526	-1.778564716	b	855
chrA04	14787510	14791348	-1.778360392	b	407
chrA05	222922	225991	-1.777107155	b	499
chrA04	15635274	15635958	-1.776289839	b	407
chrA01	7382338	7383528	-1.776179027	b	604
chrA08	14466843	14468556	-1.775315451	b	413
chrA02	5538430	5539729	-1.774536225	b	602
chrA07	10846081	10847903	-1.772499049	b	540
chrA03	17513685	17515004	-1.772265424	b	880
chrA02	6021566	6021905	-1.771440012	b	602
chrA10	8503314	8505748	-1.771158103	b	405
Scaffolds	82937	85952	-1.770732416	b	128
chrA06	10310596	10314962	-1.770272595	b	636
chrA09	13735063	13737757	-1.769089585	b	855
chrA04	16301259	16302012	-1.76841856	b	407
chrA03	26075649	26077580	-1.768237038	b	880
chrA09	727402	729077	-1.767295105	b	855
Scaffolds	109595	112580	-1.766373814	b	128
chrA05	3444794	3448644	-1.76521999	b	499
chrA09	30368505	30369714	-1.765187646	b	855
chrA08	16476732	16478209	-1.764970555	b	413
chrA09	33096507	33097035	-1.764606237	b	855
chrA01	27437890	27439247	-1.764057389	b	604
chrA03	30150241	30152197	-1.763783621	b	880
chrA06	5191665	5192079	-1.763380291	b	636
chrA08	13585608	13586586	-1.762325275	b	413
chrA07	8312426	8312807	-1.762260553	b	540
chrA01	6862585	6863566	-1.762200208	b	604
chrA03	21417576	21418353	-1.76173397	b	880
chrA05	21676344	21678251	-1.76153423	b	499
chrA03	27383203	27386573	-1.761164797	b	880
chrA03	18346056	18347617	-1.760633845	b	880
chrA03	26637603	26638309	-1.758439808	b	880
chrA01	26801621	26804454	-1.757682166	b	604
chrA09	36818653	36829237	-1.755059854	b	855
chrA05	480824	481958	-1.751959122	b	499
chrA07	12069259	12070118	-1.749460748	b	540
chrA04	15678039	15679799	-1.748855928	b	407
chrA04	11081338	11085047	-1.746548701	b	407
chrA02	16088492	16090741	-1.746162798	b	602
chrA03	24744544	24748194	-1.745665863	b	880
chrA08	11892077	11894367	-1.744923608	b	413
chrA06	22674002	22675424	-1.744650589	b	636
chrA09	34711239	34714261	-1.743851332	b	855
chrA03	13302611	13302890	-1.743381773	b	880
Scaffolds	15085	15421	-1.741280364	b	128
Scaffolds	244739	247002	-1.740976777	b	128
chrA01	977885	979607	-1.740453331	b	604
chrA01	24915223	24915850	-1.740233411	b	604
chrA02	17181830	17185411	-1.740131263	b	602
chrA08	1308734	1312647	-1.739782095	b	413
chrA07	16168972	16170686	-1.738731494	b	540
chrA07	825841	827006	-1.738138369	b	540
chrA04	10980625	10981587	-1.73805586	b	407
chrA05	651697	654589	-1.73798199	b	499
chrA03	3218393	3219940	-1.737819761	b	880
chrA06	15649006	15650265	-1.735904455	b	636
chrA06	24943438	24944327	-1.735374794	b	636
chrA03	1720998	1721735	-1.735068403	b	880
chrA07	14136133	14137675	-1.735023865	b	540
chrA09	9505268	9507326	-1.733277899	b	855
chrA06	10589151	10590392	-1.732858715	b	636
chrA06	21362413	21375215	-1.732574506	b	636
chrA02	22603421	22604548	-1.732090912	b	602
chrA01	10997590	10999403	-1.73133253	b	604
chrA02	23555904	23557586	-1.731087425	b	602
chrA05	965976	967800	-1.730908193	b	499
chrA03	8701705	8702834	-1.729546744	b	880
chrA05	23401837	23402998	-1.728429639	b	499
chrA01	1836384	1838651	-1.728381834	b	604
chrA03	13264238	13264928	-1.726478596	b	880
chrA05	20178918	20181181	-1.726031323	b	499
chrA07	22175215	22178211	-1.725810099	b	540
chrA03	1576935	1578706	-1.724660697	b	880
chrA08	13236105	13236738	-1.724546608	b	413
chrA05	649536	650129	-1.724288002	b	499
chrA01	12646460	12647450	-1.724141547	b	604
chrA06	6424826	6426446	-1.723799083	b	636
Scaffolds	16533	17616	-1.723716546	b	128
chrA01	4538128	4539010	-1.723442358	b	604
chrA05	17304215	17307559	-1.721731569	b	499
chrA09	15040140	15041400	-1.721298967	b	855
chrA01	3623416	3626827	-1.721036145	b	604
chrA03	7043771	7047188	-1.720354073	b	880
chrA02	11805268	11807741	-1.720133243	b	602
chrA10	15907662	15909428	-1.719698954	b	405
chrA07	11645973	11647279	-1.719093546	b	540
chrA05	20598608	20601064	-1.718809577	b	499
chrA01	10976425	10976813	-1.717501587	b	604
chrA05	19306898	19307765	-1.717315851	b	499
chrA05	18360613	18362396	-1.71691343	b	499
chrA09	36428069	36432684	-1.716815431	b	855
chrA07	21817793	21820782	-1.716645574	b	540
chrA01	26663367	26664705	-1.716216396	b	604
chrA08	5321	6518	-1.716204038	b	413
chrA07	7108042	7108765	-1.714860996	b	540
chrA07	22312676	22312961	-1.713381054	b	540
chrA07	18811075	18811879	-1.71255682	b	540
chrA10	13968459	13970640	-1.71159711	b	405
chrA02	2075755	2077537	-1.711350749	b	602
chrA05	11495866	11497038	-1.710336991	b	499
chrA05	20499850	20501836	-1.710177854	b	499
chrA06	21836839	21838075	-1.709611021	b	636
chrA07	18234875	18235856	-1.709196762	b	540
chrA08	20121325	20122021	-1.709140827	b	413
chrA09	5232547	5235304	-1.708649727	b	855
chrA07	5289028	5289785	-1.708038035	b	540
chrA02	16700899	16702340	-1.707976154	b	602
chrA03	1887406	1888318	-1.707224657	b	880
chrA07	17170332	17170794	-1.707169718	b	540
chrA09	35489303	35490437	-1.705813838	b	855
chrA06	15020888	15021368	-1.70551182	b	636
chrA08	12451652	12455023	-1.704652934	b	413
chrA04	16026762	16029329	-1.704053932	b	407
chrA06	10763581	10765150	-1.702835192	b	636
chrA07	20712686	20713516	-1.702730814	b	540
chrA06	9319338	9321465	-1.702285108	b	636
chrA04	1313020	1315816	-1.702280757	b	407
chrA08	17609091	17610948	-1.700137552	b	413
chrA10	9521076	9522253	-1.698508925	b	405
chrA07	12539406	12540441	-1.698275004	b	540
chrA10	4114509	4115027	-1.698133345	b	405
chrA06	3047215	3048269	-1.697700741	b	636
chrA03	11556502	11561938	-1.69684277	b	880
chrA06	15135954	15138575	-1.696145244	b	636
chrA04	17740054	17742003	-1.696059518	b	407
chrA04	16506896	16508740	-1.69593831	b	407
chrA03	22567363	22568734	-1.695733345	b	880
chrA07	7369149	7370778	-1.695066906	b	540
chrA06	7658270	7661155	-1.694228689	b	636
chrA01	10072293	10073420	-1.69310794	b	604
chrA09	29575318	29578832	-1.692092577	b	855
chrA04	2723521	2725050	-1.69072449	b	407
chrA04	17377631	17379720	-1.689739097	b	407
chrA10	3941919	3946941	-1.689462732	b	405
chrA05	15124493	15125716	-1.689430882	b	499
chrA08	19423417	19424417	-1.689280417	b	413
chrA09	35315844	35318054	-1.688163001	b	855
chrA08	20854397	20854793	-1.686802472	b	413
chrA07	4941138	4952510	-1.686628809	b	540
chrA08	14721421	14722454	-1.686395733	b	413
chrA06	11564369	11565567	-1.685708263	b	636
chrA10	12900405	12902012	-1.685604005	b	405
chrA06	12243885	12244395	-1.685431418	b	636
chrA03	16062924	16065560	-1.684771092	b	880
chrA10	12960519	12962744	-1.68346164	b	405
chrA04	5974888	5975569	-1.682957341	b	407
chrA08	10516519	10517164	-1.6821116	b	413
chrA05	16695302	16698007	-1.682016564	b	499
chrA06	3075364	3078294	-1.681713903	b	636
chrA03	19772884	19776068	-1.680795133	b	880
chrA02	4477722	4480737	-1.68022977	b	602
chrA09	15676851	15680410	-1.679709027	b	855
chrA09	28129713	28132853	-1.679566415	b	855
chrA02	6434659	6436096	-1.678657943	b	602
chrA05	20270223	20270760	-1.678294236	b	499
chrA04	16809266	16811033	-1.67810782	b	407
chrA07	5242286	5243068	-1.677981025	b	540
chrA02	24500211	24502312	-1.676884678	b	602
chrA01	14011240	14012740	-1.676801863	b	604
chrA04	14278422	14281588	-1.67669041	b	407
chrA03	11582916	11583687	-1.676689526	b	880
chrA07	21857292	21858111	-1.675690915	b	540
chrA05	1132575	1134473	-1.675435963	b	499
chrA09	35409156	35413092	-1.674937184	b	855
chrA08	14810152	14810812	-1.6738792	b	413
chrA06	466263	467055	-1.673650568	b	636
chrA09	3831200	3832532	-1.671981419	b	855
chrA06	23200292	23200781	-1.6712546	b	636
chrA10	7165420	7166383	-1.669818457	b	405
chrA01	23555406	23556763	-1.669561982	b	604
chrA06	1548287	1548899	-1.668729393	b	636
chrA03	5141158	5142765	-1.667774379	b	880
chrA07	19617128	19617332	-1.667610181	b	540
chrA02	3254563	3258260	-1.667507764	b	602
chrA06	22050172	22053857	-1.666141731	b	636
chrA03	20265486	20269512	-1.665777931	b	880
chrA03	6092029	6092745	-1.665758228	b	880
chrA03	5535906	5540990	-1.664861193	b	880
chrA06	25230602	25232815	-1.662721863	b	636
chrA07	5348571	5349997	-1.662563083	b	540
chrA06	25792022	25793080	-1.662524429	b	636
chrA02	9727794	9728369	-1.662281794	b	602
chrA02	6366322	6367878	-1.662151051	b	602
chrA03	12231631	12232450	-1.661552432	b	880
chrA10	15282461	15284213	-1.661032569	b	405
chrA09	36581424	36582723	-1.660816247	b	855
chrA03	23622355	23624349	-1.660527084	b	880
chrA02	24622966	24623962	-1.65971403	b	602
chrA03	22370965	22371301	-1.659679587	b	880
chrA10	7863870	7866692	-1.658543309	b	405
chrA02	18944312	18945578	-1.657770679	b	602
chrA09	3879752	3881217	-1.657563374	b	855
chrA09	15445801	15446481	-1.656924828	b	855
chrA03	13033971	13034373	-1.6561126	b	880
chrA09	7007944	7009183	-1.655200809	b	855
chrA05	1105589	1106376	-1.655078528	b	499
chrA06	10121382	10123498	-1.654660648	b	636
chrA10	6554056	6554584	-1.654309965	b	405
chrA01	27782495	27785952	-1.654123061	b	604
chrA09	14515039	14515525	-1.653952932	b	855
chrA05	5037074	5038040	-1.653922099	b	499
chrA01	2292066	2294194	-1.651798928	b	604
chrA09	28336619	28337306	-1.651505203	b	855
chrA01	19105517	19106424	-1.64982047	b	604
chrA01	12415706	12417440	-1.649735833	b	604
chrA06	5239091	5239583	-1.649300485	b	636
chrA04	16814465	16815361	-1.648348697	b	407
chrA02	26436734	26437893	-1.646741011	b	602
chrA07	9070660	9072114	-1.645788749	b	540
chrA02	11257184	11258150	-1.645727264	b	602
chrA09	5033505	5035659	-1.645500004	b	855
chrA02	6118610	6118948	-1.645045827	b	602
chrA03	19107802	19108510	-1.644950859	b	880
chrA09	13466452	13469003	-1.644793526	b	855
chrA07	12391019	12393646	-1.644626807	b	540
chrA02	21654872	21656414	-1.644258834	b	602
chrA01	25402704	25403890	-1.64424101	b	604
chrA06	21780961	21783248	-1.644084273	b	636
chrA01	11135642	11136193	-1.643848082	b	604
chrA04	17536312	17536856	-1.642931121	b	407
chrA06	5930244	5931009	-1.642184692	b	636
chrA06	21408715	21414651	-1.641966819	b	636
chrA05	19640614	19645270	-1.641925573	b	499
chrA09	34877411	34880163	-1.64040927	b	855
chrA02	9210253	9211885	-1.63934106	b	602
chrA09	30334776	30336576	-1.63918396	b	855
chrA10	13099521	13101578	-1.638838294	b	405
chrA08	17606239	17607394	-1.638830804	b	413
chrA01	7566265	7569272	-1.638541633	b	604
chrA09	32011169	32012732	-1.637802495	b	855
chrA07	7743098	7747908	-1.637164318	b	540
chrA03	9942398	9945269	-1.636601773	b	880
chrA02	13696861	13697359	-1.636440177	b	602
chrA01	6875691	6877113	-1.634794285	b	604
chrA03	25768777	25769930	-1.634175397	b	880
chrA04	18797100	18797502	-1.633437918	b	407
chrA07	18563899	18567514	-1.632639652	b	540
chrA07	13310209	13311760	-1.631493213	b	540
chrA01	24577708	24581739	-1.630425674	b	604
chrA07	9874582	9877867	-1.630014108	b	540
chrA03	28991842	28993375	-1.628079511	b	880
chrA02	23570584	23571055	-1.627351925	b	602
chrA03	9927920	9928464	-1.627209634	b	880
chrA01	8457482	8458967	-1.626774956	b	604
chrA07	17665172	17666663	-1.625489741	b	540
chrA01	7480979	7482106	-1.625462215	b	604
chrA03	9129019	9130925	-1.62508553	b	880
chrA06	18368313	18373422	-1.624785884	b	636
chrA04	17418885	17419983	-1.624583914	b	407
chrA09	25436135	25437752	-1.623366712	b	855
chrA02	1135974	1137289	-1.623266149	b	602
chrA02	10108722	10109557	-1.622946828	b	602
chrA09	30338686	30341666	-1.621467397	b	855
chrA09	25770908	25771640	-1.620632147	b	855
chrA02	639937	642880	-1.620584729	b	602
chrA09	19468731	19470171	-1.620537152	b	855
chrA03	10454396	10457937	-1.620530361	b	880
chrA03	5079157	5084626	-1.620156794	b	880
chrA09	3634086	3635452	-1.61859937	b	855
chrA03	17280838	17282575	-1.616820149	b	880
chrA10	16552882	16555219	-1.615922887	b	405
chrA06	15744522	15746415	-1.614999153	b	636
chrA03	15615249	15617378	-1.614459881	b	880
chrA03	908747	910916	-1.614397902	b	880
chrA06	25247173	25249133	-1.614051853	b	636
chrA01	13272246	13273863	-1.613538434	b	604
chrA03	8777898	8780379	-1.613300854	b	880
chrA07	4149015	4150488	-1.612726136	b	540
chrA03	2653700	2656465	-1.611349641	b	880
chrA05	676970	678431	-1.610981677	b	499
chrA06	9475717	9480198	-1.610680398	b	636
chrA04	17738558	17739691	-1.610304316	b	407
chrA03	28556198	28557784	-1.610081071	b	880
chrA02	17585680	17590077	-1.609783108	b	602
chrA02	8003705	8005899	-1.609274295	b	602
chrA05	2413451	2417691	-1.608701783	b	499
chrA05	12156281	12159000	-1.608313987	b	499
chrA05	22486861	22487293	-1.607898069	b	499
chrA10	15023512	15025336	-1.606937863	b	405
chrA03	15414545	15414926	-1.60603059	b	880
chrA08	2572358	2574967	-1.605708692	b	413
chrA02	4692380	4692887	-1.605647972	b	602
chrA02	21391876	21393817	-1.604966872	b	602
chrA04	8105849	8106897	-1.604735251	b	407
chrA06	4153051	4154715	-1.604679097	b	636
chrA03	4403053	4405862	-1.60436509	b	880
chrA03	5983038	5984721	-1.603777935	b	880
chrA06	17007941	17011751	-1.602980544	b	636
chrA10	8974240	8974723	-1.60227821	b	405
chrA03	5805734	5806073	-1.60131076	b	880
chrA04	7216491	7218302	-1.600303053	b	407
chrA05	7340694	7341003	-1.599561402	b	499
chrA04	15530647	15532839	-1.59936143	b	407
chrA06	6866551	6867130	-1.599288333	b	636
chrA04	11247302	11250989	-1.599170255	b	407
chrA06	2392441	2394430	-1.598786285	b	636
chrA07	19863615	19864245	-1.598738372	b	540
chrA03	3415666	3416342	-1.597921355	b	880
chrA01	27613688	27614651	-1.597868329	b	604
chrA07	13477279	13478740	-1.597740222	b	540
chrA03	27402515	27404239	-1.596633642	b	880
chrA05	21655475	21657542	-1.596468649	b	499
chrA07	17984603	17985564	-1.596049099	b	540
chrA07	17338975	17347969	-1.595781116	b	540
chrA01	10290457	10290895	-1.595624997	b	604
chrA04	17154432	17156718	-1.59536899	b	407
chrA06	17829491	17831356	-1.594684066	b	636
chrA02	9433233	9435059	-1.594557722	b	602
chrA04	4157010	4158285	-1.594099592	b	407
chrA09	35470372	35472265	-1.593641569	b	855
chrA01	23579746	23588057	-1.59361441	b	604
chrA05	21921474	21922071	-1.593049541	b	499
chrA06	1502087	1502631	-1.592857203	b	636
chrA03	29981148	29982217	-1.592720237	b	880
chrA02	6522994	6525551	-1.592016352	b	602
chrA06	17845810	17848659	-1.591866118	b	636
Scaffolds	11294	12467	-1.590772473	b	128
chrA06	20971255	20972692	-1.590466034	b	636
chrA04	6082752	6090864	-1.589622423	b	407
chrA05	268734	269043	-1.589401139	b	499
chrA06	760672	761503	-1.588023776	b	636
chrA04	16213076	16214340	-1.587987025	b	407
chrA09	5017774	5018793	-1.587787635	b	855
chrA05	6084811	6087335	-1.587771498	b	499
chrA01	12294024	12295512	-1.587708976	b	604
chrA08	1437425	1437992	-1.587513545	b	413
chrA09	26555481	26557188	-1.587382545	b	855
chrA10	17213099	17215219	-1.586604502	b	405
chrA05	21680018	21682375	-1.585954056	b	499
Scaffolds	963	1632	-1.58513798	b	128
chrA03	24091938	24097447	-1.585034987	b	880
chrA07	15929797	15933878	-1.584869425	b	540
chrA02	11933363	11933804	-1.584603871	b	602
chrA06	5082440	5083040	-1.583899151	b	636
chrA03	11190759	11193776	-1.583855906	b	880
chrA05	13631309	13631702	-1.58377733	b	499
chrA09	33729437	33734890	-1.582586937	b	855
chrA01	5303087	5304156	-1.582183116	b	604
chrA08	20023202	20024836	-1.58165296	b	413
chrA09	4131064	4131688	-1.577902907	b	855
chrA03	22995951	22996827	-1.576858256	b	880
chrA02	4611001	4611997	-1.57634577	b	602
chrA02	8857433	8859140	-1.57620452	b	602
chrA05	21824649	21825159	-1.575817994	b	499
chrA07	18133013	18134141	-1.575435192	b	540
chrA07	18030312	18034487	-1.57475182	b	540
Scaffolds	32966	33416	-1.573526615	b	128
chrA05	19028481	19030218	-1.573160688	b	499
chrA03	9980844	9982911	-1.57302554	b	880
chrA08	19461628	19462378	-1.572788227	b	413
chrA04	7429483	7432253	-1.572204558	b	407
chrA08	16108711	16109414	-1.572106963	b	413
chrA10	9959926	9960613	-1.572052504	b	405
chrA01	26452813	26453321	-1.571256942	b	604
chrA08	19764555	19766425	-1.570959348	b	413
chrA02	23944784	23945362	-1.56945354	b	602
chrA02	20403490	20405632	-1.569267466	b	602
chrA06	3391444	3392611	-1.569173169	b	636
chrA01	23534316	23536401	-1.568476275	b	604
chrA06	8350096	8351187	-1.565899023	b	636
chrA02	5187182	5189484	-1.565865092	b	602
chrA02	1196101	1197271	-1.565421499	b	602
chrA06	1805049	1805856	-1.565417997	b	636
chrA09	11100178	11100976	-1.565406772	b	855
chrA09	2282712	2284593	-1.565048618	b	855
chrA07	9207389	9208121	-1.564700667	b	540
chrA05	18805577	18808158	-1.564101078	b	499
chrA10	15553597	15554059	-1.563743454	b	405
chrA03	14119859	14121541	-1.561929724	b	880
chrA10	8762556	8763048	-1.561663714	b	405
chrA02	15709614	15714176	-1.561530266	b	602
chrA05	319334	320626	-1.561465597	b	499
chrA06	7505314	7508584	-1.560759178	b	636
chrA09	28911508	28913350	-1.560538133	b	855
chrA07	14130661	14131313	-1.56052632	b	540
chrA05	17109879	17110926	-1.559950801	b	499
chrA08	12792963	12793409	-1.559920261	b	413
chrA03	2521360	2526643	-1.559849192	b	880
chrA07	1843729	1844471	-1.559580154	b	540
chrA04	338520	343670	-1.559074961	b	407
chrA08	9846254	9849660	-1.558773114	b	413
chrA10	12054358	12056187	-1.557364669	b	405
chrA02	26456746	26458285	-1.556549136	b	602
chrA03	21896073	21898799	-1.556114894	b	880
chrA08	13319332	13320765	-1.555933611	b	413
chrA08	15732555	15733748	-1.555512115	b	413
chrA03	19890423	19891101	-1.555401615	b	880
chrA09	18756765	18758612	-1.555390951	b	855
chrA09	36497123	36499772	-1.554797491	b	855
chrA01	7201726	7202078	-1.55436829	b	604
chrA10	4990254	4992281	-1.554015464	b	405
chrA02	15857715	15858210	-1.553514272	b	602
chrA07	15085651	15086645	-1.553323473	b	540
chrA06	14661823	14664832	-1.552652543	b	636
chrA03	20043851	20044635	-1.552039566	b	880
chrA03	16740831	16743852	-1.551580016	b	880
chrA01	15465998	15466656	-1.549974508	b	604
chrA01	7121289	7128019	-1.54898857	b	604
chrA01	16227597	16231350	-1.548921873	b	604
chrA04	11915107	11918431	-1.54871666	b	407
chrA04	3745043	3746738	-1.548416265	b	407
chrA03	9131331	9132037	-1.54814353	b	880
chrA08	16700415	16702575	-1.547534382	b	413
chrA01	7710401	7711255	-1.546746038	b	604
chrA02	24800220	24802382	-1.546618912	b	602
chrA01	15912639	15913911	-1.546437305	b	604
chrA08	19722237	19727310	-1.545599933	b	413
chrA09	14742260	14743084	-1.545540743	b	855
chrA04	17372146	17374496	-1.54543823	b	407
chrA03	25776591	25777366	-1.543762831	b	880
chrA04	10289668	10290547	-1.543220893	b	407
chrA09	20345302	20346243	-1.543020793	b	855
chrA08	16516910	16518927	-1.542990395	b	413
chrA03	1784490	1785669	-1.542940953	b	880
chrA01	1402736	1406179	-1.542490844	b	604
chrA09	28475990	28477250	-1.542163386	b	855
chrA07	10543478	10544192	-1.54188146	b	540
chrA04	13151245	13152375	-1.540684874	b	407
chrA01	5891409	5892978	-1.540454227	b	604
chrA09	5641750	5646610	-1.539452057	b	855
chrA03	17845739	17847321	-1.539362419	b	880
chrA06	24298350	24300741	-1.539335507	b	636
chrA04	9806995	9807382	-1.53912486	b	407
chrA01	9868748	9870310	-1.538547527	b	604
chrA01	7670906	7674379	-1.53798857	b	604
chrA03	11617309	11619260	-1.537842868	b	880
chrA08	2426578	2430232	-1.536592925	b	413
chrA09	2287455	2289886	-1.536566926	b	855
chrA06	4599124	4601797	-1.536464463	b	636
chrA03	7691493	7691784	-1.536428658	b	880
chrA05	21427271	21428696	-1.535741122	b	499
chrA05	26819	29238	-1.535567501	b	499
chrA03	25729901	25733794	-1.535553527	b	880
chrA04	15005620	15007857	-1.534561439	b	407
chrA01	14363701	14365251	-1.534022225	b	604
chrA03	15710230	15713661	-1.533981495	b	880
chrA07	7634940	7635782	-1.533604543	b	540
chrA06	7424140	7427605	-1.53331761	b	636
chrA06	17808418	17809465	-1.533275042	b	636
chrA05	355363	356943	-1.533261115	b	499
chrA05	5818872	5819163	-1.533116028	b	499
chrA04	9127782	9129338	-1.532662079	b	407
chrA06	10924179	10925344	-1.532362199	b	636
chrA02	21385527	21386296	-1.532130803	b	602
chrA04	18766856	18768314	-1.531219886	b	407
chrA09	27370181	27370706	-1.531114917	b	855
chrA03	8909056	8912540	-1.530108422	b	880
chrA03	17036180	17038280	-1.529715983	b	880
chrA05	21718101	21719914	-1.529549919	b	499
chrA03	18643879	18649799	-1.529096228	b	880
chrA02	2215022	2216653	-1.528597366	b	602
chrA05	5005891	5007781	-1.527880221	b	499
chrA09	30241165	30241732	-1.526505935	b	855
Scaffolds	146865	148170	-1.525566091	b	128
chrA02	6686860	6688023	-1.525396776	b	602
chrA09	6598522	6598882	-1.52526034	b	855
chrA03	4031309	4035457	-1.524954002	b	880
chrA09	2370647	2371495	-1.524458562	b	855
chrA09	28444723	28445963	-1.523936724	b	855
chrA06	6588302	6588599	-1.523914239	b	636
chrA07	20233044	20233398	-1.521582654	b	540
chrA06	13158163	13158676	-1.520810029	b	636
chrA08	10479760	10480174	-1.520365435	b	413
chrA02	27052135	27053584	-1.520295098	b	602
chrA09	35523640	35524259	-1.520119144	b	855
chrA06	21042045	21044983	-1.519776475	b	636
chrA05	18920734	18924045	-1.519738311	b	499
chrA06	3689176	3691264	-1.519262068	b	636
chrA09	34198488	34200415	-1.519151728	b	855
chrA04	18769211	18770250	-1.51785126	b	407
chrA08	17657098	17660773	-1.517172235	b	413
chrA06	19424743	19426693	-1.516703468	b	636
chrA10	3460171	3462329	-1.51565503	b	405
chrA05	7885829	7886098	-1.514139847	b	499
chrA04	3162018	3173084	-1.51388536	b	407
chrA02	24642953	24646055	-1.513212297	b	602
chrA01	2191373	2196276	-1.51159593	b	604
chrA03	9246426	9247095	-1.510776446	b	880
chrA01	27522940	27526536	-1.510669229	b	604
chrA02	312739	314235	-1.509911978	b	602
chrA05	770587	772519	-1.509665864	b	499
chrA09	1511850	1515279	-1.50953588	b	855
chrA09	26569734	26571445	-1.509061979	b	855
chrA09	23433544	23435722	-1.506631285	b	855
chrA05	12844440	12846356	-1.506183867	b	499
chrA10	14697215	14698355	-1.506044111	b	405
chrA07	12218973	12220786	-1.505670008	b	540
chrA10	17392986	17394651	-1.50561672	b	405
chrA01	1880959	1882770	-1.50545427	b	604
chrA05	7808854	7811305	-1.505047032	b	499
chrA10	13544478	13545989	-1.504891022	b	405
chrA02	1490233	1491274	-1.504652696	b	602
chrA05	17314461	17314964	-1.504276965	b	499
chrA04	4169397	4170690	-1.503997172	b	407
chrA06	672853	674834	-1.503937953	b	636
chrA08	17908559	17911511	-1.503913729	b	413
Scaffolds	26953	31251	-1.503730709	b	128
chrA03	13914187	13915518	-1.503338747	b	880
chrA09	19614684	19617200	-1.502630492	b	855
chrA02	27641732	27642526	-1.501476941	b	602
chrA02	1398433	1399479	-1.501471178	b	602
chrA04	17546380	17547993	-1.501420683	b	407
chrA01	1821290	1823593	-1.501215192	b	604
chrA09	540367	541572	-1.500889305	b	855
chrA06	14388502	14389781	-1.500488073	b	636
chrA01	19282	20267	-1.50037469	b	604
chrA01	11590044	11593049	-1.499765354	b	604
chrA09	13774193	13774948	-1.498872086	b	855
chrA03	17078387	17081446	-1.498666135	b	880
chrA09	35387910	35391227	-1.498373471	b	855
chrA10	4830420	4832038	-1.497843162	b	405
chrA10	6600017	6600935	-1.497693501	b	405
chrA04	16740989	16743295	-1.496780434	b	407
chrA03	5063687	5064300	-1.496535217	b	880
chrA05	5330836	5335845	-1.496161955	b	499
chrA09	15658185	15658740	-1.49559524	b	855
chrA03	18806264	18807410	-1.495085223	b	880
chrA02	7000467	7003446	-1.494863403	b	602
chrA06	6394941	6400503	-1.494651244	b	636
chrA05	20457811	20462045	-1.494035886	b	499
chrA08	3796941	3798962	-1.493753768	b	413
chrA01	23968854	23972326	-1.493383728	b	604
chrA06	14594330	14595030	-1.492158752	b	636
chrA07	9719459	9721050	-1.491497088	b	540
chrA02	6603215	6605259	-1.491267083	b	602
chrA09	1331720	1334848	-1.491113878	b	855
chrA02	16966950	16968621	-1.489908969	b	602
chrA05	12718385	12718637	-1.489681108	b	499
chrA01	6291736	6292162	-1.489290641	b	604
chrA03	6097974	6101603	-1.489235413	b	880
chrA05	3401763	3405030	-1.488311518	b	499
chrA01	2012543	2013682	-1.487407308	b	604
chrA04	14861686	14861944	-1.486810096	b	407
chrA09	36260256	36261375	-1.48663788	b	855
chrA09	11063816	11068212	-1.485943586	b	855
chrA02	5371764	5373846	-1.485880759	b	602
chrA10	11421213	11422473	-1.485707069	b	405
chrA06	665182	667879	-1.485125977	b	636
chrA10	13895171	13896787	-1.484815956	b	405
chrA06	243381	243561	-1.483968387	b	636
chrA01	23448341	23449996	-1.483433511	b	604
chrA05	5831052	5832336	-1.483363435	b	499
chrA05	3666396	3668031	-1.483313348	b	499
chrA07	21393422	21395970	-1.481971183	b	540
chrA08	12889448	12892033	-1.479728361	b	413
Scaffolds	3136	7559	-1.47871692	b	128
chrA01	16175105	16178599	-1.478709253	b	604
chrA05	11060024	11064355	-1.478032905	b	499
chrA06	8905753	8907313	-1.475959311	b	636
chrA03	15299605	15302435	-1.475490858	b	880
chrA03	11485793	11486258	-1.472953384	b	880
chrA09	20601408	20613387	-1.472531714	b	855
chrA06	25890458	25893157	-1.472486283	b	636
chrA01	8381420	8382866	-1.471830442	b	604
chrA04	16921886	16922889	-1.471266567	b	407
chrA03	5242679	5245099	-1.470774923	b	880
chrA08	18929388	18929676	-1.468948754	b	413
[truncated: 3,970 more rows]
