# Supplementary material for: BrPP5.2 Overexpression Confers Heat Shock Tolerance in Transgenic Brassica rapa through Inherent Chaperone Activity, Induced Glucosinolate Biosynthesis, and Differential Regulation of Abiotic Stress Response Genes
Source: Int J Mol Sci. 2021 Jun 16;22(12):6437. doi: 10.3390/ijms22126437 (PMC8234546; doi:10.3390/ijms22126437)
Supplement: Supplementary file 1 [file ijms-22-06437-s001.zip › results 864 down DEGs.csv]

source	term_name	term_id	adjusted_p_value	negative_log10_of_adjusted_p_value	term_size	query_size	intersection_size	effective_domain_size	intersections
GO:MF	DNA-binding transcription factor activity	GO:0003700	9.281008202582083e-12	11.032404843497213	1644	546	96	21188	AT2G22760,AT1G63030,AT4G34410,AT5G51990,AT1G12610,AT1G19220,AT1G71450,AT1G28370,AT5G52020,AT3G02380,AT1G19210,AT1G01060,AT2G46830,AT2G20080,AT2G44840,AT1G80840,AT1G22810,AT5G67300,AT2G26150,AT5G62020,AT3G19580,AT3G21150,AT5G21960,AT1G33760,AT3G50060,AT5G49450,AT1G70000,AT3G17609,AT5G15850,AT3G51910,AT1G68670,AT1G68810,AT3G23250,AT3G15210,AT3G09600,AT3G55980,AT3G21890,AT1G74930,AT4G17490,AT5G02840…
GO:MF	transcription regulator activity	GO:0140110	2.1884734381593325e-10	9.65985872011819	1787	546	98	21188	AT2G22760,AT1G63030,AT4G34410,AT5G51990,AT1G12610,AT1G19220,AT1G71450,AT1G28370,AT5G52020,AT3G02380,AT1G19210,AT1G01060,AT2G46830,AT2G20080,AT2G44840,AT1G80840,AT1G22810,AT5G67300,AT2G26150,AT5G62020,AT3G19580,AT3G21150,AT5G21960,AT1G33760,AT3G50060,AT5G49450,AT1G70000,AT3G17609,AT5G15850,AT3G51910,AT1G68670,AT1G68810,AT3G23250,AT3G15210,AT4G37610,AT3G09600,AT3G55980,AT3G21890,AT1G74930,AT4G17490…
GO:MF	transcription regulatory region sequence-specific DNA binding	GO:0000976	1.8766589847880635e-7	6.7266146375970814	960	556	60	21188	AT2G22760,AT4G34410,AT5G51990,AT1G12610,AT1G19220,AT1G28370,AT5G52020,AT1G19210,AT1G01060,AT2G44840,AT1G80840,AT1G22810,AT5G67300,AT2G26150,AT5G62020,AT3G19580,AT3G50060,AT5G49450,AT3G17609,AT3G51910,AT1G68670,AT3G23250,AT3G15210,AT3G21890,AT1G74930,AT4G17490,AT5G02840,AT3G54810,AT3G49530,AT3G28920,AT5G60890,AT3G61890,AT5G47230,AT4G32800,AT1G71030,AT5G43650,AT1G51700,AT1G21910,AT1G27730,AT2G46400…
GO:MF	regulatory region nucleic acid binding	GO:0001067	1.8766589847880635e-7	6.7266146375970814	960	556	60	21188	AT2G22760,AT4G34410,AT5G51990,AT1G12610,AT1G19220,AT1G28370,AT5G52020,AT1G19210,AT1G01060,AT2G44840,AT1G80840,AT1G22810,AT5G67300,AT2G26150,AT5G62020,AT3G19580,AT3G50060,AT5G49450,AT3G17609,AT3G51910,AT1G68670,AT3G23250,AT3G15210,AT3G21890,AT1G74930,AT4G17490,AT5G02840,AT3G54810,AT3G49530,AT3G28920,AT5G60890,AT3G61890,AT5G47230,AT4G32800,AT1G71030,AT5G43650,AT1G51700,AT1G21910,AT1G27730,AT2G46400…
GO:MF	sequence-specific double-stranded DNA binding	GO:1990837	5.23348564863008e-7	6.281208962425664	986	556	60	21188	AT2G22760,AT4G34410,AT5G51990,AT1G12610,AT1G19220,AT1G28370,AT5G52020,AT1G19210,AT1G01060,AT2G44840,AT1G80840,AT1G22810,AT5G67300,AT2G26150,AT5G62020,AT3G19580,AT3G50060,AT5G49450,AT3G17609,AT3G51910,AT1G68670,AT3G23250,AT3G15210,AT3G21890,AT1G74930,AT4G17490,AT5G02840,AT3G54810,AT3G49530,AT3G28920,AT5G60890,AT3G61890,AT5G47230,AT4G32800,AT1G71030,AT5G43650,AT1G51700,AT1G21910,AT1G27730,AT2G46400…
GO:MF	sequence-specific DNA binding	GO:0043565	0.0000010667358157043472	5.971943123207143	1290	556	71	21188	AT2G22760,AT4G34410,AT5G51990,AT1G12610,AT1G19220,AT1G28370,AT5G52020,AT1G19210,AT1G01060,AT2G46830,AT2G44840,AT1G80840,AT1G22810,AT5G67300,AT2G26150,AT5G62020,AT3G19580,AT3G50060,AT5G49450,AT3G17609,AT3G51910,AT1G68670,AT3G23250,AT3G15210,AT3G09600,AT3G21890,AT1G74930,AT4G17490,AT5G02840,AT5G62570,AT3G54810,AT3G49530,AT3G28920,AT5G15130,AT5G60890,AT3G61890,AT5G47230,AT4G32800,AT3G24500,AT1G71030…
GO:MF	double-stranded DNA binding	GO:0003690	0.000004274802658981863	5.369083929144794	1095	556	62	21188	AT2G22760,AT4G34410,AT5G51990,AT1G12610,AT1G19220,AT1G28370,AT5G52020,AT1G19210,AT1G01060,AT2G44840,AT1G80840,AT1G22810,AT5G67300,AT2G26150,AT5G62020,AT3G19580,AT3G50060,AT5G49450,AT3G17609,AT3G51910,AT1G68670,AT3G23250,AT3G15210,AT3G21890,AT1G74930,AT4G17490,AT5G02840,AT3G54810,AT3G49530,AT3G28920,AT5G60890,AT3G61890,AT5G47230,AT4G32800,AT1G71030,AT5G43650,AT1G51700,AT5G61270,AT1G21910,AT1G27730…
GO:MF	molecular function regulator	GO:0098772	0.000015858961315132467	4.799725260264212	2438	546	106	21188	AT2G22760,AT1G63030,AT4G34410,AT5G51990,AT1G12610,AT1G19220,AT1G71450,AT1G28370,AT5G52020,AT3G02380,AT3G17130,AT1G19210,AT1G01060,AT2G46830,AT2G20080,AT2G44840,AT1G80840,AT1G22810,AT5G67300,AT2G26150,AT5G62020,AT3G19580,AT3G21150,AT5G21960,AT1G33760,AT3G50060,AT3G10720,AT5G49450,AT1G70000,AT3G17609,AT5G15850,AT3G51910,AT1G68670,AT1G68810,AT3G23250,AT3G15210,AT4G37610,AT3G09600,AT3G55980,AT3G21890…
GO:MF	chlorophyll binding	GO:0016168	0.0000518467974700496	4.285278064425185	34	721	10	21188	AT3G27690,AT2G05100,AT5G54270,AT2G34430,AT1G29930,AT1G61520,AT1G29920,AT5G02120,AT4G10340,AT1G15820
GO:MF	1-aminocyclopropane-1-carboxylate synthase activity	GO:0016847	0.0012246256548321616	2.911996646716931	8	307	4	21188	AT4G08040,AT4G26200,AT4G11280,AT4G37770
GO:MF	DNA binding	GO:0003677	0.040564941090592804	1.3918491503788204	2585	548	97	21188	AT2G22760,AT1G63030,AT4G34410,AT5G51990,AT1G12610,AT1G19220,AT3G28917,AT1G71450,AT1G28370,AT5G52020,AT3G02380,AT1G19210,AT1G01060,AT2G46830,AT2G44840,AT1G80840,AT1G22810,AT5G67300,AT2G26150,AT5G62020,AT3G19580,AT5G21960,AT1G33760,AT3G50060,AT2G46790,AT5G49450,AT1G70000,AT3G17609,AT5G15850,AT3G51910,AT1G68670,AT1G68810,AT3G23250,AT3G15210,AT3G09600,AT3G55980,AT3G21890,AT1G74930,AT4G17490,AT5G02840…
GO:BP	cellular response to decreased oxygen levels	GO:0036294	1.923783605954309e-44	43.7158437805442	241	657	67	23416	AT1G69890,AT1G54050,AT5G45340,AT1G15010,AT2G40000,AT4G29780,AT1G74310,AT4G01360,AT2G26150,AT5G57560,AT2G01180,AT5G62520,AT5G20230,AT2G32210,AT1G68670,AT5G41080,AT5G66650,AT5G42380,AT1G19020,AT3G15210,AT4G34150,AT3G55980,AT4G32480,AT5G54490,AT1G18300,AT5G12020,AT5G06320,AT1G76600,AT4G27657,AT3G03280,AT4G24570,AT1G61340,AT4G22780,AT3G24500,AT1G76650,AT3G07350,AT1G03220,AT3G52800,AT1G07135,AT2G40140…
GO:BP	cellular response to oxygen levels	GO:0071453	1.923783605954309e-44	43.7158437805442	241	657	67	23416	AT1G69890,AT1G54050,AT5G45340,AT1G15010,AT2G40000,AT4G29780,AT1G74310,AT4G01360,AT2G26150,AT5G57560,AT2G01180,AT5G62520,AT5G20230,AT2G32210,AT1G68670,AT5G41080,AT5G66650,AT5G42380,AT1G19020,AT3G15210,AT4G34150,AT3G55980,AT4G32480,AT5G54490,AT1G18300,AT5G12020,AT5G06320,AT1G76600,AT4G27657,AT3G03280,AT4G24570,AT1G61340,AT4G22780,AT3G24500,AT1G76650,AT3G07350,AT1G03220,AT3G52800,AT1G07135,AT2G40140…
GO:BP	response to chemical	GO:0042221	7.712683711872824e-44	43.11279447818043	3407	678	247	23416	AT4G34410,AT5G51990,AT1G12610,AT1G19220,AT5G15180,AT1G71450,AT1G69890,AT4G15480,AT1G28370,AT1G54050,AT5G45340,AT5G52020,AT1G15010,AT2G34600,AT3G27690,AT1G19210,AT3G57530,AT1G01060,AT2G40000,AT2G46830,AT2G44840,AT4G29780,AT1G80840,AT4G17615,AT4G22620,AT1G74310,AT4G01360,AT1G22810,AT5G67300,AT5G45820,AT2G26150,AT5G57560,AT5G62020,AT3G19580,AT3G21150,AT5G21960,AT4G35770,AT2G01180,AT1G33760,AT5G62520…
GO:BP	cellular response to hypoxia	GO:0071456	1.5615432499374624e-43	42.80644598264796	239	657	66	23416	AT1G69890,AT1G54050,AT5G45340,AT1G15010,AT2G40000,AT4G29780,AT1G74310,AT4G01360,AT2G26150,AT5G57560,AT2G01180,AT5G62520,AT5G20230,AT2G32210,AT1G68670,AT5G41080,AT5G66650,AT5G42380,AT1G19020,AT3G15210,AT4G34150,AT3G55980,AT4G32480,AT5G54490,AT1G18300,AT5G12020,AT5G06320,AT1G76600,AT4G27657,AT3G03280,AT4G24570,AT1G61340,AT4G22780,AT3G24500,AT1G76650,AT3G07350,AT1G03220,AT3G52800,AT1G07135,AT2G40140…
GO:BP	response to abiotic stimulus	GO:0009628	5.1304052335051114e-42	41.289848330068594	2372	724	206	23416	AT1G12610,AT3G55580,AT3G57260,AT1G69890,AT4G15480,AT1G54050,AT5G45340,AT1G15010,AT3G27690,AT3G57530,AT1G01060,AT2G40000,AT2G46830,AT4G29780,AT4G17615,AT1G74310,AT1G02400,AT4G01360,AT1G22810,AT5G67300,AT2G26150,AT5G57560,AT5G62020,AT3G19580,AT3G21150,AT2G01180,AT5G62520,AT2G46790,AT5G49450,AT2G03760,AT1G70000,AT5G20230,AT1G77760,AT3G17609,AT2G32210,AT2G43790,AT3G51910,AT1G68670,AT5G41080,AT1G18740…
GO:BP	response to decreased oxygen levels	GO:0036293	3.6762370146038794e-41	40.43459649651979	268	657	67	23416	AT1G69890,AT1G54050,AT5G45340,AT1G15010,AT2G40000,AT4G29780,AT1G74310,AT4G01360,AT2G26150,AT5G57560,AT2G01180,AT5G62520,AT5G20230,AT2G32210,AT1G68670,AT5G41080,AT5G66650,AT5G42380,AT1G19020,AT3G15210,AT4G34150,AT3G55980,AT4G32480,AT5G54490,AT1G18300,AT5G12020,AT5G06320,AT1G76600,AT4G27657,AT3G03280,AT4G24570,AT1G61340,AT4G22780,AT3G24500,AT1G76650,AT3G07350,AT1G03220,AT3G52800,AT1G07135,AT2G40140…
GO:BP	response to oxygen levels	GO:0070482	4.772804005969653e-41	40.32122639946437	269	657	67	23416	AT1G69890,AT1G54050,AT5G45340,AT1G15010,AT2G40000,AT4G29780,AT1G74310,AT4G01360,AT2G26150,AT5G57560,AT2G01180,AT5G62520,AT5G20230,AT2G32210,AT1G68670,AT5G41080,AT5G66650,AT5G42380,AT1G19020,AT3G15210,AT4G34150,AT3G55980,AT4G32480,AT5G54490,AT1G18300,AT5G12020,AT5G06320,AT1G76600,AT4G27657,AT3G03280,AT4G24570,AT1G61340,AT4G22780,AT3G24500,AT1G76650,AT3G07350,AT1G03220,AT3G52800,AT1G07135,AT2G40140…
GO:BP	response to hypoxia	GO:0001666	1.6537439712605809e-40	39.78153172602623	264	657	66	23416	AT1G69890,AT1G54050,AT5G45340,AT1G15010,AT2G40000,AT4G29780,AT1G74310,AT4G01360,AT2G26150,AT5G57560,AT2G01180,AT5G62520,AT5G20230,AT2G32210,AT1G68670,AT5G41080,AT5G66650,AT5G42380,AT1G19020,AT3G15210,AT4G34150,AT3G55980,AT4G32480,AT5G54490,AT1G18300,AT5G12020,AT5G06320,AT1G76600,AT4G27657,AT3G03280,AT4G24570,AT1G61340,AT4G22780,AT3G24500,AT1G76650,AT3G07350,AT1G03220,AT3G52800,AT1G07135,AT2G40140…
GO:BP	response to stimulus	GO:0050896	7.937733675757019e-40	39.100303476490765	6807	724	384	23416	AT1G14960,AT3G59700,AT1G75030,AT4G34410,AT5G51990,AT1G12610,AT1G19220,AT3G55580,AT5G15180,AT3G57260,AT1G71450,AT1G69890,AT4G15480,AT5G41750,AT1G28370,AT1G54050,AT5G45340,AT5G52020,AT1G15010,AT2G34600,AT3G27690,AT1G19210,AT3G57530,AT1G01060,AT2G40000,AT2G46830,AT2G44840,AT4G29780,AT1G80840,AT3G55840,AT3G48520,AT4G17615,AT4G14450,AT4G22620,AT1G74310,AT1G76610,AT1G02400,AT4G01360,AT1G22810,AT5G67300…
GO:BP	response to stress	GO:0006950	7.51444489515772e-39	38.12410309596518	3969	657	255	23416	AT1G14960,AT3G59700,AT1G75030,AT4G34410,AT1G12610,AT3G55580,AT5G15180,AT3G57260,AT1G69890,AT1G54050,AT5G45340,AT5G52020,AT1G15010,AT2G34600,AT3G27690,AT3G57530,AT1G01060,AT2G40000,AT2G46830,AT2G44840,AT4G29780,AT1G80840,AT3G55840,AT3G48520,AT4G17615,AT4G14450,AT1G74310,AT4G01360,AT1G22810,AT5G67300,AT2G26150,AT5G57560,AT5G62020,AT3G19580,AT4G35770,AT2G01180,AT5G62520,AT3G28340,AT1G02660,AT1G17750…
GO:BP	response to chitin	GO:0010200	6.828044181077643e-36	35.165703677431914	139	667	48	23416	AT4G34410,AT2G34600,AT2G44840,AT1G80840,AT5G67300,AT2G26150,AT5G62020,AT3G19580,AT3G21150,AT3G50060,AT2G33580,AT3G23250,AT3G15210,AT4G37610,AT5G66070,AT3G55980,AT4G17490,AT3G49530,AT5G47230,AT5G59550,AT1G51700,AT2G35930,AT5G64660,AT1G20823,AT3G52800,AT5G48655,AT2G40140,AT1G27730,AT2G46400,AT4G37260,AT2G17040,AT5G59820,AT3G52450,AT5G67450,AT1G64380,AT4G31550,AT3G16530,AT3G19380,AT4G01250,AT5G59450…
GO:BP	cellular response to chemical stimulus	GO:0070887	1.4204104228486748e-32	31.84758614954343	1793	657	151	23416	AT4G34410,AT5G51990,AT1G19220,AT5G15180,AT1G71450,AT1G69890,AT1G28370,AT1G54050,AT5G45340,AT5G52020,AT1G15010,AT2G34600,AT3G27690,AT1G19210,AT3G57530,AT2G40000,AT2G44840,AT4G29780,AT4G17615,AT1G74310,AT4G01360,AT1G22810,AT5G67300,AT2G26150,AT5G57560,AT3G19580,AT5G21960,AT2G01180,AT1G33760,AT5G62520,AT3G50060,AT5G49450,AT1G19770,AT1G28480,AT5G20230,AT3G49570,AT2G30020,AT2G33580,AT2G32210,AT2G43790…
GO:BP	response to oxygen-containing compound	GO:1901700	5.411564854986481e-28	27.266677132376707	1812	673	146	23416	AT4G34410,AT5G51990,AT1G12610,AT1G54050,AT5G45340,AT2G34600,AT3G27690,AT3G57530,AT1G01060,AT2G40000,AT2G46830,AT2G44840,AT1G80840,AT4G17615,AT1G74310,AT1G22810,AT5G67300,AT5G45820,AT2G26150,AT5G57560,AT5G62020,AT3G19580,AT3G21150,AT4G35770,AT3G50060,AT1G17750,AT5G49450,AT2G03760,AT1G28480,AT1G70000,AT2G30020,AT2G33580,AT2G43790,AT1G68670,AT3G02840,AT3G23250,AT1G36370,AT5G42380,AT5G66210,AT5G56980…
GO:BP	response to organonitrogen compound	GO:0010243	2.647467812151886e-26	25.57716931132994	291	667	55	23416	AT4G34410,AT2G34600,AT2G46830,AT2G44840,AT1G80840,AT5G67300,AT2G26150,AT5G62020,AT3G19580,AT3G21150,AT3G50060,AT2G33580,AT2G43790,AT3G23250,AT1G36370,AT1G09080,AT3G15210,AT4G37610,AT5G66070,AT3G55980,AT4G17490,AT2G29110,AT3G49530,AT3G17611,AT1G61340,AT5G47230,AT5G59550,AT1G51700,AT2G35930,AT5G64660,AT1G20823,AT3G52800,AT5G48655,AT2G40140,AT1G27730,AT2G46400,AT4G37260,AT2G17040,AT5G59820,AT3G52450…
GO:BP	cellular response to stimulus	GO:0051716	5.787021326442544e-24	23.237544917163106	3511	657	206	23416	AT3G59700,AT4G34410,AT5G51990,AT1G19220,AT3G55580,AT5G15180,AT1G71450,AT1G69890,AT5G41750,AT1G28370,AT1G54050,AT5G45340,AT5G52020,AT1G15010,AT2G34600,AT3G27690,AT1G19210,AT3G57530,AT2G40000,AT2G44840,AT4G29780,AT4G17615,AT1G74310,AT4G01360,AT1G22810,AT5G67300,AT5G45820,AT2G26150,AT5G57560,AT5G62020,AT3G19580,AT3G21150,AT5G21960,AT2G01180,AT1G33760,AT5G62520,AT3G50060,AT2G20142,AT2G46790,AT5G49450…
GO:BP	response to organic substance	GO:0010033	7.506869533982987e-24	23.12454113191084	2313	651	157	23416	AT4G34410,AT5G51990,AT1G19220,AT1G71450,AT1G28370,AT5G52020,AT2G34600,AT3G27690,AT1G19210,AT3G57530,AT1G01060,AT2G40000,AT2G46830,AT2G44840,AT1G80840,AT4G17615,AT4G22620,AT1G22810,AT5G67300,AT5G45820,AT2G26150,AT5G57560,AT5G62020,AT3G19580,AT3G21150,AT5G21960,AT4G35770,AT1G33760,AT3G50060,AT1G17750,AT5G49450,AT1G19770,AT2G03760,AT1G28480,AT1G70000,AT2G30020,AT2G33580,AT2G43790,AT1G68670,AT3G23250…
GO:BP	response to nitrogen compound	GO:1901698	3.896518183919977e-23	22.409323292693713	361	667	57	23416	AT4G34410,AT2G34600,AT2G46830,AT2G44840,AT1G80840,AT5G67300,AT2G26150,AT5G62020,AT3G19580,AT3G21150,AT3G50060,AT2G33580,AT2G43790,AT3G23250,AT1G36370,AT1G09080,AT3G15210,AT4G37610,AT5G66070,AT3G55980,AT4G17490,AT2G29110,AT3G49530,AT3G17611,AT1G61340,AT5G47230,AT5G59550,AT1G51700,AT2G35930,AT5G64660,AT1G20823,AT3G52800,AT5G48655,AT2G40140,AT1G27730,AT2G46400,AT4G37260,AT3G27170,AT2G17040,AT5G59820…
GO:BP	cellular response to stress	GO:0033554	9.783308152968058e-20	19.009514266925578	1329	657	106	23416	AT3G55580,AT1G69890,AT1G54050,AT5G45340,AT1G15010,AT2G40000,AT4G29780,AT1G74310,AT4G01360,AT1G22810,AT2G26150,AT5G57560,AT5G62020,AT2G01180,AT5G62520,AT5G49450,AT4G36950,AT5G20230,AT2G32210,AT2G43790,AT3G51910,AT1G68670,AT5G41080,AT5G66650,AT1G04770,AT5G42380,AT1G19020,AT1G09080,AT3G15210,AT2G22240,AT4G34150,AT3G55980,AT4G32480,AT5G54490,AT1G18300,AT5G12020,AT5G06320,AT1G01140,AT1G76600,AT3G49530…
GO:BP	response to temperature stimulus	GO:0009266	1.7454994125217677e-17	16.75808029301915	656	644	67	23416	AT1G12610,AT3G55580,AT3G57260,AT1G54050,AT3G27690,AT1G01060,AT2G46830,AT4G17615,AT1G74310,AT2G26150,AT5G57560,AT5G62020,AT5G20230,AT2G43790,AT3G51910,AT1G18740,AT3G23250,AT1G09080,AT2G22240,AT4G37610,AT2G05100,AT4G34150,AT3G55980,AT5G12020,AT2G29500,AT1G01140,AT4G12400,AT3G49530,AT5G48570,AT1G16030,AT5G47230,AT3G24500,AT3G12580,AT5G37770,AT4G38580,AT1G20823,AT1G80820,AT1G21910,AT2G40140,AT1G27730…
GO:BP	response to endogenous stimulus	GO:0009719	2.6484152287701038e-14	13.57701392352754	1877	651	118	23416	AT4G34410,AT5G51990,AT1G19220,AT1G71450,AT1G28370,AT5G52020,AT2G34600,AT3G27690,AT1G19210,AT3G57530,AT1G01060,AT2G46830,AT2G44840,AT4G17615,AT4G22620,AT1G22810,AT5G67300,AT5G45820,AT5G57560,AT3G19580,AT5G21960,AT4G35770,AT1G33760,AT3G50060,AT1G17750,AT1G19770,AT1G28480,AT1G70000,AT2G30020,AT2G33580,AT2G43790,AT1G68670,AT3G23250,AT1G36370,AT5G66210,AT5G56980,AT3G15210,AT4G08950,AT2G22240,AT1G74950…
GO:BP	response to hormone	GO:0009725	1.0860285759548168e-13	12.96415874729209	1839	651	115	23416	AT4G34410,AT5G51990,AT1G19220,AT1G71450,AT1G28370,AT5G52020,AT2G34600,AT3G27690,AT1G19210,AT3G57530,AT1G01060,AT2G46830,AT2G44840,AT4G17615,AT4G22620,AT1G22810,AT5G67300,AT5G45820,AT5G57560,AT3G19580,AT5G21960,AT4G35770,AT1G33760,AT3G50060,AT1G17750,AT1G19770,AT1G28480,AT1G70000,AT2G30020,AT2G43790,AT1G68670,AT3G23250,AT5G66210,AT5G56980,AT3G15210,AT4G08950,AT2G22240,AT1G74950,AT4G37610,AT3G09600…
GO:BP	defense response	GO:0006952	1.5711221298686069e-12	11.803790054128433	1603	646	102	23416	AT1G14960,AT3G59700,AT1G75030,AT4G34410,AT3G57260,AT5G52020,AT1G15010,AT2G34600,AT2G40000,AT2G44840,AT1G80840,AT3G55840,AT3G48520,AT4G14450,AT5G67300,AT2G01180,AT1G02660,AT1G17750,AT2G03760,AT2G30020,AT2G33580,AT2G43790,AT2G17660,AT5G66210,AT5G56980,AT3G15210,AT2G23810,AT2G22240,AT1G74950,AT5G66070,AT3G55980,AT3G52400,AT2G27500,AT2G32800,AT1G74930,AT4G17490,AT1G28360,AT5G06320,AT5G62570,AT3G49530…
GO:BP	response to ethylene	GO:0009723	3.013869667940019e-11	10.520875532286254	323	213	23	23416	AT4G34410,AT1G19220,AT1G71450,AT1G28370,AT5G52020,AT1G19210,AT1G01060,AT2G46830,AT2G44840,AT1G22810,AT5G67300,AT5G21960,AT1G33760,AT3G50060,AT1G70000,AT2G43790,AT3G23250,AT3G15210,AT3G09600,AT1G74930,AT4G17490,AT5G02840,AT1G28360
GO:BP	response to cold	GO:0009409	3.732803171952523e-10	9.427964909508077	441	603	42	23416	AT1G12610,AT3G55580,AT3G57260,AT3G27690,AT1G01060,AT2G46830,AT4G17615,AT5G57560,AT5G20230,AT2G43790,AT1G18740,AT3G23250,AT4G37610,AT2G05100,AT4G34150,AT3G55980,AT1G01140,AT3G49530,AT5G47230,AT5G37770,AT1G20823,AT1G80820,AT1G21910,AT2G40140,AT1G27730,AT1G02270,AT1G05260,AT3G08720,AT3G14210,AT1G16670,AT4G25470,AT4G02330,AT5G59820,AT3G11410,AT5G67450,AT3G45640,AT5G62470,AT5G54470,AT4G34710,AT1G61520…
GO:BP	response to wounding	GO:0009611	4.2046008329598253e-10	9.376275227992464	204	595	28	23416	AT2G34600,AT1G80840,AT3G48520,AT4G35770,AT1G17750,AT2G30020,AT5G56980,AT1G74950,AT2G32800,AT1G74930,AT5G06320,AT1G01140,AT4G11280,AT1G72520,AT1G61340,AT1G30135,AT1G76650,AT1G27730,AT1G01720,AT1G32920,AT3G24550,AT5G59820,AT1G71697,AT1G51400,AT3G45640,AT4G34710,AT3G25250,AT1G19180
GO:BP	response to jasmonic acid	GO:0009753	1.111603543531393e-9	8.954050077463506	247	398	25	23416	AT2G34600,AT1G01060,AT2G46830,AT5G67300,AT4G35770,AT1G17750,AT1G28480,AT1G70000,AT2G43790,AT3G23250,AT5G56980,AT3G15210,AT1G74950,AT3G09600,AT1G70170,AT2G32800,AT5G02840,AT4G11280,AT5G60890,AT1G61340,AT1G30135,AT1G71030,AT1G21910,AT2G46400,AT4G37260
GO:BP	response to inorganic substance	GO:0010035	3.011557598606416e-9	8.521208826161766	1015	526	61	23416	AT1G12610,AT1G54050,AT5G45340,AT3G27690,AT1G01060,AT2G46830,AT4G17615,AT1G74310,AT1G22810,AT5G67300,AT2G26150,AT3G19580,AT1G70000,AT2G43790,AT3G02840,AT3G23250,AT1G36370,AT5G42380,AT2G22240,AT4G37610,AT3G09600,AT2G05100,AT5G52050,AT1G70170,AT5G02840,AT5G12020,AT3G61430,AT3G14440,AT2G29500,AT4G12400,AT4G25200,AT4G11280,AT1G62660,AT1G32560,AT1G72520,AT3G61890,AT3G63060,AT3G24500,AT3G12580,AT1G71030…
GO:BP	response to external biotic stimulus	GO:0043207	5.960532244526178e-9	8.22471495828994	1426	645	86	23416	AT3G59700,AT4G34410,AT3G57260,AT5G52020,AT1G15010,AT2G40000,AT1G80840,AT3G48520,AT4G14450,AT5G67300,AT2G01180,AT1G02660,AT1G17750,AT5G49450,AT5G20230,AT2G30020,AT2G33580,AT2G43790,AT2G17660,AT5G66210,AT5G56980,AT2G38290,AT3G15210,AT2G23810,AT2G22240,AT3G55980,AT3G52400,AT2G32800,AT1G74930,AT4G17490,AT5G06320,AT5G62570,AT3G49530,AT3G11820,AT4G20830,AT1G62660,AT1G16030,AT1G72520,AT5G52450,AT5G60890…
GO:BP	response to other organism	GO:0051707	5.960532244526178e-9	8.22471495828994	1426	645	86	23416	AT3G59700,AT4G34410,AT3G57260,AT5G52020,AT1G15010,AT2G40000,AT1G80840,AT3G48520,AT4G14450,AT5G67300,AT2G01180,AT1G02660,AT1G17750,AT5G49450,AT5G20230,AT2G30020,AT2G33580,AT2G43790,AT2G17660,AT5G66210,AT5G56980,AT2G38290,AT3G15210,AT2G23810,AT2G22240,AT3G55980,AT3G52400,AT2G32800,AT1G74930,AT4G17490,AT5G06320,AT5G62570,AT3G49530,AT3G11820,AT4G20830,AT1G62660,AT1G16030,AT1G72520,AT5G52450,AT5G60890…
GO:BP	response to oxidative stress	GO:0006979	6.9895536238950625e-9	8.155550558856511	498	710	47	23416	AT5G15180,AT1G54050,AT2G40000,AT1G74310,AT2G26150,AT4G35770,AT3G28340,AT5G20230,AT2G43790,AT3G02840,AT5G42380,AT1G19020,AT2G22240,AT4G37610,AT1G09940,AT4G17490,AT5G12020,AT2G29500,AT4G12400,AT5G59080,AT4G20830,AT4G11280,AT1G72520,AT5G19890,AT3G12580,AT5G37770,AT1G27730,AT4G23190,AT3G46930,AT1G05260,AT5G42180,AT1G53540,AT5G59820,AT5G26030,AT5G05410,AT1G51400,AT3G45640,AT4G34710,AT3G25250,AT1G73680…
GO:BP	response to heat	GO:0009408	8.205143545718004e-9	8.085913816735458	244	644	30	23416	AT1G12610,AT1G54050,AT1G74310,AT2G26150,AT5G57560,AT5G62020,AT3G51910,AT1G09080,AT2G22240,AT5G12020,AT2G29500,AT4G12400,AT5G48570,AT1G16030,AT3G24500,AT3G12580,AT5G37770,AT4G38580,AT1G21910,AT3G08720,AT1G53540,AT5G59820,AT5G05410,AT2G21320,AT3G22830,AT3G11020,AT5G51190,AT1G76560,AT4G27670,AT1G52340
GO:BP	response to light stimulus	GO:0009416	9.260697848557534e-9	8.033356285417598	778	721	62	23416	AT4G15480,AT1G54050,AT5G45340,AT3G27690,AT1G01060,AT2G46830,AT1G74310,AT1G02400,AT2G26150,AT3G21150,AT2G01180,AT2G46790,AT5G20230,AT1G77760,AT3G17609,AT2G43790,AT3G51910,AT2G22240,AT3G09600,AT2G05100,AT3G21890,AT1G70170,AT4G17490,AT5G54270,AT4G27310,AT2G29500,AT4G12400,AT2G31380,AT2G30520,AT3G17611,AT1G66700,AT5G24120,AT5G23730,AT3G12580,AT5G37770,AT1G35210,AT2G34430,AT3G17040,AT5G61270,AT1G27730…
GO:BP	response to biotic stimulus	GO:0009607	9.598957912623936e-9	8.017775912519017	1439	645	86	23416	AT3G59700,AT4G34410,AT3G57260,AT5G52020,AT1G15010,AT2G40000,AT1G80840,AT3G48520,AT4G14450,AT5G67300,AT2G01180,AT1G02660,AT1G17750,AT5G49450,AT5G20230,AT2G30020,AT2G33580,AT2G43790,AT2G17660,AT5G66210,AT5G56980,AT2G38290,AT3G15210,AT2G23810,AT2G22240,AT3G55980,AT3G52400,AT2G32800,AT1G74930,AT4G17490,AT5G06320,AT5G62570,AT3G49530,AT3G11820,AT4G20830,AT1G62660,AT1G16030,AT1G72520,AT5G52450,AT5G60890…
GO:BP	response to abscisic acid	GO:0009737	1.1204532925176129e-8	7.950606242854629	658	604	50	23416	AT5G51990,AT3G27690,AT3G57530,AT1G01060,AT2G46830,AT4G17615,AT5G67300,AT5G45820,AT3G19580,AT1G70000,AT2G30020,AT2G43790,AT1G68670,AT5G66210,AT3G15210,AT3G09600,AT2G05100,AT5G66070,AT3G07360,AT5G52050,AT5G02840,AT5G54270,AT3G11820,AT1G62660,AT3G61890,AT1G61340,AT3G63060,AT3G24500,AT1G71030,AT5G37770,AT5G59550,AT1G27730,AT3G46930,AT4G37260,AT1G63840,AT1G01720,AT3G29575,AT2G37170,AT3G11410,AT5G67450…
GO:BP	response to alcohol	GO:0097305	1.3948965840990608e-8	7.85545798925058	662	604	50	23416	AT5G51990,AT3G27690,AT3G57530,AT1G01060,AT2G46830,AT4G17615,AT5G67300,AT5G45820,AT3G19580,AT1G70000,AT2G30020,AT2G43790,AT1G68670,AT5G66210,AT3G15210,AT3G09600,AT2G05100,AT5G66070,AT3G07360,AT5G52050,AT5G02840,AT5G54270,AT3G11820,AT1G62660,AT3G61890,AT1G61340,AT3G63060,AT3G24500,AT1G71030,AT5G37770,AT5G59550,AT1G27730,AT3G46930,AT4G37260,AT1G63840,AT1G01720,AT3G29575,AT2G37170,AT3G11410,AT5G67450…
GO:BP	interspecies interaction between organisms	GO:0044419	1.4275942322480223e-8	7.845395215345067	1475	645	87	23416	AT3G59700,AT3G60720,AT4G34410,AT3G57260,AT5G52020,AT1G15010,AT2G40000,AT1G80840,AT3G48520,AT4G14450,AT5G67300,AT2G01180,AT1G02660,AT1G17750,AT5G49450,AT5G20230,AT2G30020,AT2G33580,AT2G43790,AT2G17660,AT5G66210,AT5G56980,AT2G38290,AT3G15210,AT2G23810,AT2G22240,AT3G55980,AT3G52400,AT2G32800,AT1G74930,AT4G17490,AT5G06320,AT5G62570,AT3G49530,AT3G11820,AT4G20830,AT1G62660,AT1G16030,AT1G72520,AT5G52450…
GO:BP	response to salt stress	GO:0009651	2.01496284219628e-8	7.6957329582464	625	461	41	23416	AT1G54050,AT3G57530,AT1G01060,AT2G46830,AT4G17615,AT5G67300,AT3G19580,AT5G62520,AT5G49450,AT2G03760,AT1G70000,AT2G43790,AT3G23250,AT3G09600,AT1G70170,AT5G02840,AT5G12020,AT3G14440,AT1G01520,AT2G29500,AT1G01140,AT1G62660,AT5G62460,AT1G61340,AT3G63060,AT5G24120,AT1G71030,AT1G03220,AT4G01070,AT1G27730,AT3G46930,AT1G05260,AT3G08720,AT4G37260,AT5G24660,AT1G53540,AT1G28380,AT5G59820,AT3G56880,AT5G67450…
GO:BP	response to external stimulus	GO:0009605	2.1534859182574407e-8	7.666857963763505	1873	645	102	23416	AT3G59700,AT4G34410,AT3G57260,AT5G52020,AT1G15010,AT2G40000,AT1G80840,AT3G48520,AT4G14450,AT1G76610,AT1G22810,AT5G67300,AT5G57560,AT2G01180,AT1G02660,AT1G17750,AT5G49450,AT5G20230,AT3G17609,AT2G30020,AT2G33580,AT2G43790,AT2G17660,AT1G04770,AT5G66210,AT5G56980,AT2G38290,AT3G15210,AT2G23810,AT2G22240,AT2G41660,AT3G55980,AT3G52400,AT2G32800,AT1G74930,AT4G17490,AT5G06320,AT5G62570,AT1G01140,AT3G49530…
GO:BP	cellular response to organic substance	GO:0071310	2.651857117136626e-8	7.576449879554902	1270	537	69	23416	AT4G34410,AT5G51990,AT1G19220,AT1G71450,AT1G28370,AT5G52020,AT2G34600,AT3G27690,AT1G19210,AT3G57530,AT2G44840,AT4G17615,AT1G22810,AT5G67300,AT2G26150,AT3G19580,AT5G21960,AT1G33760,AT3G50060,AT5G49450,AT1G19770,AT1G28480,AT2G30020,AT2G33580,AT2G43790,AT1G36370,AT5G66210,AT1G09080,AT3G15210,AT1G74950,AT2G05100,AT5G66070,AT3G07360,AT2G32800,AT1G74930,AT4G17490,AT2G29110,AT1G28360,AT3G49530,AT1G62660…
GO:BP	response to osmotic stress	GO:0006970	3.0555565903283945e-8	7.5149096685339885	701	545	48	23416	AT1G54050,AT3G57530,AT1G01060,AT2G46830,AT4G17615,AT5G67300,AT3G19580,AT5G62520,AT5G49450,AT2G03760,AT1G70000,AT2G43790,AT3G23250,AT3G09600,AT1G70170,AT5G02840,AT5G12020,AT3G14440,AT1G01520,AT2G29500,AT1G01140,AT1G62660,AT1G32560,AT3G61890,AT5G62460,AT1G61340,AT3G63060,AT5G24120,AT1G71030,AT1G03220,AT4G01070,AT1G27730,AT3G46930,AT1G05260,AT3G08720,AT4G37260,AT5G24660,AT1G53540,AT1G28380,AT5G59820…
GO:BP	response to radiation	GO:0009314	3.650110544897517e-8	7.437693982581333	804	721	62	23416	AT4G15480,AT1G54050,AT5G45340,AT3G27690,AT1G01060,AT2G46830,AT1G74310,AT1G02400,AT2G26150,AT3G21150,AT2G01180,AT2G46790,AT5G20230,AT1G77760,AT3G17609,AT2G43790,AT3G51910,AT2G22240,AT3G09600,AT2G05100,AT3G21890,AT1G70170,AT4G17490,AT5G54270,AT4G27310,AT2G29500,AT4G12400,AT2G31380,AT2G30520,AT3G17611,AT1G66700,AT5G24120,AT5G23730,AT3G12580,AT5G37770,AT1G35210,AT2G34430,AT3G17040,AT5G61270,AT1G27730…
GO:BP	regulation of transcription, DNA-templated	GO:0006355	6.352430102246011e-8	7.197060104927867	2477	667	126	23416	AT2G22760,AT1G63030,AT4G34410,AT5G51990,AT1G12610,AT1G19220,AT1G71450,AT1G28370,AT5G52020,AT3G02380,AT3G12320,AT1G19210,AT1G01060,AT2G46830,AT2G20080,AT5G40790,AT2G44840,AT1G80840,AT1G22810,AT5G67300,AT2G26150,AT5G62020,AT3G19580,AT3G21150,AT5G21960,AT1G33760,AT3G50060,AT2G46790,AT5G49450,AT1G28480,AT1G70000,AT3G17609,AT5G15850,AT3G51910,AT1G68670,AT1G68810,AT3G23250,AT3G56290,AT3G15210,AT4G37610…
GO:BP	cellular response to endogenous stimulus	GO:0071495	7.170940266718035e-8	7.144423895116856	1101	537	62	23416	AT4G34410,AT5G51990,AT1G19220,AT1G71450,AT1G28370,AT5G52020,AT2G34600,AT3G27690,AT1G19210,AT3G57530,AT2G44840,AT4G17615,AT1G22810,AT5G67300,AT3G19580,AT5G21960,AT1G33760,AT3G50060,AT1G19770,AT1G28480,AT2G30020,AT2G33580,AT2G43790,AT1G36370,AT5G66210,AT3G15210,AT1G74950,AT2G05100,AT5G66070,AT3G07360,AT2G32800,AT1G74930,AT4G17490,AT2G29110,AT1G28360,AT1G62660,AT5G17300,AT5G47230,AT3G63060,AT4G32800…
GO:BP	regulation of nucleic acid-templated transcription	GO:1903506	9.18062561773946e-8	7.037127722603313	2491	667	126	23416	AT2G22760,AT1G63030,AT4G34410,AT5G51990,AT1G12610,AT1G19220,AT1G71450,AT1G28370,AT5G52020,AT3G02380,AT3G12320,AT1G19210,AT1G01060,AT2G46830,AT2G20080,AT5G40790,AT2G44840,AT1G80840,AT1G22810,AT5G67300,AT2G26150,AT5G62020,AT3G19580,AT3G21150,AT5G21960,AT1G33760,AT3G50060,AT2G46790,AT5G49450,AT1G28480,AT1G70000,AT3G17609,AT5G15850,AT3G51910,AT1G68670,AT1G68810,AT3G23250,AT3G56290,AT3G15210,AT4G37610…
GO:BP	regulation of RNA biosynthetic process	GO:2001141	9.18062561773946e-8	7.037127722603313	2491	667	126	23416	AT2G22760,AT1G63030,AT4G34410,AT5G51990,AT1G12610,AT1G19220,AT1G71450,AT1G28370,AT5G52020,AT3G02380,AT3G12320,AT1G19210,AT1G01060,AT2G46830,AT2G20080,AT5G40790,AT2G44840,AT1G80840,AT1G22810,AT5G67300,AT2G26150,AT5G62020,AT3G19580,AT3G21150,AT5G21960,AT1G33760,AT3G50060,AT2G46790,AT5G49450,AT1G28480,AT1G70000,AT3G17609,AT5G15850,AT3G51910,AT1G68670,AT1G68810,AT3G23250,AT3G56290,AT3G15210,AT4G37610…
GO:BP	response to acid chemical	GO:0001101	1.0336043681061686e-7	6.98564566397709	437	526	35	23416	AT1G12610,AT5G45340,AT3G27690,AT4G17615,AT1G22810,AT5G67300,AT3G19580,AT2G43790,AT3G23250,AT2G05100,AT5G52050,AT2G29110,AT3G61430,AT3G14440,AT1G62660,AT1G32560,AT3G61890,AT1G61340,AT3G63060,AT3G24500,AT5G59550,AT2G35930,AT1G27730,AT2G46400,AT3G46930,AT1G05260,AT2G37170,AT3G56880,AT3G52450,AT3G11410,AT4G27410,AT5G05410,AT3G23920,AT3G45640,AT5G62470
GO:BP	regulation of biosynthetic process	GO:0009889	1.5349660914975008e-7	6.813901213957597	2869	667	139	23416	AT2G22760,AT1G63030,AT4G34410,AT5G51990,AT1G12610,AT1G19220,AT3G55580,AT1G71450,AT1G28370,AT5G52020,AT3G27690,AT3G02380,AT3G12320,AT1G19210,AT1G01060,AT2G46830,AT2G20080,AT5G40790,AT2G44840,AT1G80840,AT1G74310,AT1G22810,AT5G67300,AT2G26150,AT5G62020,AT3G19580,AT3G21150,AT5G21960,AT1G33760,AT3G50060,AT2G46790,AT5G49450,AT1G28480,AT1G70000,AT5G20230,AT3G17609,AT5G15850,AT3G51910,AT1G68670,AT1G68810…
GO:BP	response to high light intensity	GO:0009644	2.862784205426845e-7	6.543211387544056	81	710	17	23416	AT1G54050,AT3G27690,AT1G74310,AT2G26150,AT3G51910,AT2G22240,AT2G05100,AT4G17490,AT5G54270,AT2G29500,AT4G12400,AT3G12580,AT1G27730,AT1G61520,AT4G27670,AT5G02120,AT5G64940
GO:BP	cellular response to hormone stimulus	GO:0032870	3.648207458049241e-7	6.437920473160447	1062	537	59	23416	AT4G34410,AT5G51990,AT1G19220,AT1G71450,AT1G28370,AT5G52020,AT2G34600,AT3G27690,AT1G19210,AT3G57530,AT2G44840,AT4G17615,AT1G22810,AT5G67300,AT3G19580,AT5G21960,AT1G33760,AT3G50060,AT1G19770,AT1G28480,AT2G30020,AT2G43790,AT5G66210,AT3G15210,AT1G74950,AT2G05100,AT5G66070,AT3G07360,AT2G32800,AT1G74930,AT4G17490,AT1G28360,AT1G62660,AT5G17300,AT5G47230,AT3G63060,AT4G32800,AT1G30135,AT3G24500,AT5G59550…
GO:BP	hormone-mediated signaling pathway	GO:0009755	3.9415586376823755e-7	6.404332008151596	981	537	56	23416	AT4G34410,AT5G51990,AT1G19220,AT1G71450,AT1G28370,AT5G52020,AT2G34600,AT1G19210,AT3G57530,AT2G44840,AT4G17615,AT1G22810,AT5G67300,AT3G19580,AT5G21960,AT1G33760,AT3G50060,AT1G19770,AT1G28480,AT2G30020,AT2G43790,AT5G66210,AT3G15210,AT1G74950,AT5G66070,AT3G07360,AT1G74930,AT4G17490,AT1G28360,AT1G62660,AT5G17300,AT5G47230,AT3G63060,AT4G32800,AT1G30135,AT3G24500,AT5G59550,AT1G21910,AT2G46400,AT4G37260…
GO:BP	regulation of cellular biosynthetic process	GO:0031326	4.690362596615353e-7	6.328793582098956	2844	546	117	23416	AT2G22760,AT1G63030,AT4G34410,AT5G51990,AT1G12610,AT1G19220,AT3G55580,AT1G71450,AT1G28370,AT5G52020,AT3G02380,AT3G12320,AT1G19210,AT1G01060,AT2G46830,AT2G20080,AT5G40790,AT2G44840,AT1G80840,AT1G74310,AT1G22810,AT5G67300,AT2G26150,AT5G62020,AT3G19580,AT3G21150,AT5G21960,AT1G33760,AT3G50060,AT2G46790,AT5G49450,AT1G28480,AT1G70000,AT5G20230,AT3G17609,AT5G15850,AT3G51910,AT1G68670,AT1G68810,AT3G23250…
GO:BP	response to water deprivation	GO:0009414	5.708014957885597e-7	6.2435148974847445	397	526	32	23416	AT1G12610,AT5G45340,AT3G27690,AT4G17615,AT1G22810,AT5G67300,AT3G19580,AT3G23250,AT2G05100,AT5G52050,AT3G61430,AT3G14440,AT1G62660,AT1G32560,AT3G61890,AT3G63060,AT3G24500,AT5G59550,AT2G35930,AT1G27730,AT2G46400,AT3G46930,AT1G05260,AT2G37170,AT3G56880,AT3G52450,AT3G11410,AT4G27410,AT5G05410,AT3G23920,AT3G45640,AT5G62470
GO:BP	regulation of cellular macromolecule biosynthetic process	GO:2000112	7.610480793215924e-7	6.118587905746535	2733	546	113	23416	AT2G22760,AT1G63030,AT4G34410,AT5G51990,AT1G12610,AT1G19220,AT1G71450,AT1G28370,AT5G52020,AT3G02380,AT3G12320,AT1G19210,AT1G01060,AT2G46830,AT2G20080,AT5G40790,AT2G44840,AT1G80840,AT1G74310,AT1G22810,AT5G67300,AT2G26150,AT5G62020,AT3G19580,AT3G21150,AT5G21960,AT1G33760,AT3G50060,AT2G46790,AT5G49450,AT1G28480,AT1G70000,AT3G17609,AT5G15850,AT3G51910,AT1G68670,AT1G68810,AT3G23250,AT3G56290,AT3G15210…
GO:BP	response to water	GO:0009415	9.984268862913865e-7	6.000683732538685	406	526	32	23416	AT1G12610,AT5G45340,AT3G27690,AT4G17615,AT1G22810,AT5G67300,AT3G19580,AT3G23250,AT2G05100,AT5G52050,AT3G61430,AT3G14440,AT1G62660,AT1G32560,AT3G61890,AT3G63060,AT3G24500,AT5G59550,AT2G35930,AT1G27730,AT2G46400,AT3G46930,AT1G05260,AT2G37170,AT3G56880,AT3G52450,AT3G11410,AT4G27410,AT5G05410,AT3G23920,AT3G45640,AT5G62470
GO:BP	transcription, DNA-templated	GO:0006351	0.00000121669773768455	5.914817299469232	2622	667	127	23416	AT2G22760,AT1G63030,AT4G34410,AT5G51990,AT1G12610,AT1G19220,AT1G71450,AT1G28370,AT5G52020,AT3G02380,AT3G12320,AT1G19210,AT1G01060,AT2G46830,AT2G20080,AT5G40790,AT2G44840,AT1G80840,AT1G22810,AT5G67300,AT2G26150,AT5G62020,AT3G19580,AT3G21150,AT5G21960,AT1G33760,AT3G50060,AT2G46790,AT5G49450,AT1G28480,AT1G70000,AT3G17609,AT5G15850,AT3G51910,AT1G68670,AT1G68810,AT3G23250,AT3G56290,AT3G15210,AT4G37610…
GO:BP	regulation of macromolecule biosynthetic process	GO:0010556	0.0000012413207102388582	5.906115998764935	2756	546	113	23416	AT2G22760,AT1G63030,AT4G34410,AT5G51990,AT1G12610,AT1G19220,AT1G71450,AT1G28370,AT5G52020,AT3G02380,AT3G12320,AT1G19210,AT1G01060,AT2G46830,AT2G20080,AT5G40790,AT2G44840,AT1G80840,AT1G74310,AT1G22810,AT5G67300,AT2G26150,AT5G62020,AT3G19580,AT3G21150,AT5G21960,AT1G33760,AT3G50060,AT2G46790,AT5G49450,AT1G28480,AT1G70000,AT3G17609,AT5G15850,AT3G51910,AT1G68670,AT1G68810,AT3G23250,AT3G56290,AT3G15210…
GO:BP	nucleic acid-templated transcription	GO:0097659	0.0000015834228999786798	5.800403078442372	2634	546	109	23416	AT2G22760,AT1G63030,AT4G34410,AT5G51990,AT1G12610,AT1G19220,AT1G71450,AT1G28370,AT5G52020,AT3G02380,AT3G12320,AT1G19210,AT1G01060,AT2G46830,AT2G20080,AT5G40790,AT2G44840,AT1G80840,AT1G22810,AT5G67300,AT2G26150,AT5G62020,AT3G19580,AT3G21150,AT5G21960,AT1G33760,AT3G50060,AT2G46790,AT5G49450,AT1G28480,AT1G70000,AT3G17609,AT5G15850,AT3G51910,AT1G68670,AT1G68810,AT3G23250,AT3G56290,AT3G15210,AT4G37610…
GO:BP	response to bacterium	GO:0009617	0.0000015863070097416102	5.7996127566568685	526	607	40	23416	AT3G59700,AT2G40000,AT1G80840,AT5G67300,AT1G17750,AT5G49450,AT2G43790,AT5G66210,AT5G56980,AT3G15210,AT2G23810,AT2G22240,AT2G32800,AT5G06320,AT5G62570,AT1G62660,AT1G72520,AT1G61340,AT1G66700,AT3G12580,AT2G27080,AT2G46400,AT3G08870,AT5G22250,AT4G23190,AT3G14210,AT1G16670,AT5G24660,AT4G02420,AT5G01560,AT3G25180,AT4G31550,AT3G45640,AT5G10380,AT5G24590,AT4G23180,AT3G56710,AT1G19180,AT5G49520,AT5G39670
GO:BP	response to lipid	GO:0033993	0.0000016546020178921186	5.7813064503586515	881	604	55	23416	AT5G51990,AT3G27690,AT3G57530,AT1G01060,AT2G46830,AT4G17615,AT5G67300,AT5G45820,AT5G57560,AT3G19580,AT1G70000,AT2G30020,AT2G43790,AT1G68670,AT5G66210,AT3G15210,AT4G08950,AT3G09600,AT2G05100,AT5G66070,AT3G07360,AT5G52050,AT5G02840,AT5G54270,AT3G11820,AT1G62660,AT3G61890,AT1G61340,AT3G63060,AT3G24500,AT1G71030,AT5G37770,AT5G59550,AT1G27730,AT2G46400,AT3G46930,AT4G37260,AT1G63840,AT1G01720,AT3G29575…
GO:BP	regulation of RNA metabolic process	GO:0051252	0.0000018387689643762499	5.735472835090254	2641	546	109	23416	AT2G22760,AT1G63030,AT4G34410,AT5G51990,AT1G12610,AT1G19220,AT1G71450,AT1G28370,AT5G52020,AT3G02380,AT3G12320,AT1G19210,AT1G01060,AT2G46830,AT2G20080,AT5G40790,AT2G44840,AT1G80840,AT1G22810,AT5G67300,AT2G26150,AT5G62020,AT3G19580,AT3G21150,AT5G21960,AT1G33760,AT3G50060,AT2G46790,AT5G49450,AT1G28480,AT1G70000,AT3G17609,AT5G15850,AT3G51910,AT1G68670,AT1G68810,AT3G23250,AT3G56290,AT3G15210,AT4G37610…
GO:BP	signaling	GO:0023052	0.00000196166460945232	5.7073752429882845	2211	236	53	23416	AT3G59700,AT4G34410,AT5G51990,AT1G19220,AT1G71450,AT5G41750,AT1G28370,AT5G52020,AT2G34600,AT1G73965,AT1G19210,AT3G57530,AT2G44840,AT4G17615,AT1G22810,AT5G67300,AT5G45820,AT3G19580,AT3G21150,AT5G21960,AT1G33760,AT3G50060,AT2G20142,AT2G46790,AT5G49450,AT4G36950,AT1G19770,AT1G28480,AT3G17609,AT2G30020,AT2G43790,AT1G19390,AT2G17660,AT5G42380,AT5G66210,AT1G09080,AT3G59350,AT3G15210,AT1G74950,AT2G34180…
GO:BP	RNA biosynthetic process	GO:0032774	0.0000026904293218926042	5.570178412469081	2659	546	109	23416	AT2G22760,AT1G63030,AT4G34410,AT5G51990,AT1G12610,AT1G19220,AT1G71450,AT1G28370,AT5G52020,AT3G02380,AT3G12320,AT1G19210,AT1G01060,AT2G46830,AT2G20080,AT5G40790,AT2G44840,AT1G80840,AT1G22810,AT5G67300,AT2G26150,AT5G62020,AT3G19580,AT3G21150,AT5G21960,AT1G33760,AT3G50060,AT2G46790,AT5G49450,AT1G28480,AT1G70000,AT3G17609,AT5G15850,AT3G51910,AT1G68670,AT1G68810,AT3G23250,AT3G56290,AT3G15210,AT4G37610…
GO:BP	signal transduction	GO:0007165	0.000002895382712905258	5.5382940229149344	2169	236	52	23416	AT3G59700,AT4G34410,AT5G51990,AT1G19220,AT1G71450,AT5G41750,AT1G28370,AT5G52020,AT2G34600,AT1G19210,AT3G57530,AT2G44840,AT4G17615,AT1G22810,AT5G67300,AT5G45820,AT3G19580,AT3G21150,AT5G21960,AT1G33760,AT3G50060,AT2G20142,AT2G46790,AT5G49450,AT4G36950,AT1G19770,AT1G28480,AT3G17609,AT2G30020,AT2G43790,AT1G19390,AT2G17660,AT5G42380,AT5G66210,AT1G09080,AT3G59350,AT3G15210,AT1G74950,AT2G34180,AT5G66070…
GO:BP	regulation of nucleobase-containing compound metabolic process	GO:0019219	0.0000033497527852501574	5.474987243101478	2703	546	110	23416	AT2G22760,AT1G63030,AT4G34410,AT5G51990,AT1G12610,AT1G19220,AT1G71450,AT1G28370,AT5G52020,AT3G02380,AT3G12320,AT1G19210,AT1G01060,AT2G46830,AT2G20080,AT5G40790,AT2G44840,AT1G80840,AT1G22810,AT5G67300,AT2G26150,AT5G62020,AT3G19580,AT3G21150,AT5G21960,AT1G33760,AT3G50060,AT2G46790,AT5G49450,AT1G28480,AT1G70000,AT3G17609,AT5G15850,AT3G51910,AT1G68670,AT1G68810,AT3G23250,AT1G36370,AT3G56290,AT3G15210…
GO:BP	response to salicylic acid	GO:0009751	0.000003602852089038304	5.443353566973475	232	398	20	23416	AT1G01060,AT2G40000,AT2G46830,AT1G80840,AT5G67300,AT3G50060,AT2G03760,AT1G28480,AT1G70000,AT4G37610,AT3G09600,AT2G32800,AT5G02840,AT5G06320,AT1G61340,AT1G66700,AT1G71030,AT1G21910,AT2G46400,AT4G37260
GO:BP	response to hydrogen peroxide	GO:0042542	0.000005158815718169539	5.287449985600527	85	710	16	23416	AT1G54050,AT1G74310,AT2G26150,AT2G43790,AT2G22240,AT4G37610,AT5G12020,AT2G29500,AT4G12400,AT3G12580,AT5G37770,AT1G53540,AT5G05410,AT4G27670,AT5G63160,AT5G64940
GO:BP	photosynthesis, light harvesting in photosystem I	GO:0009768	0.000013976598712573291	4.854598503846706	23	721	9	23416	AT3G27690,AT2G05100,AT5G54270,AT2G34430,AT1G29930,AT1G61520,AT1G29920,AT4G10340,AT1G15820
GO:BP	cell communication	GO:0007154	0.00001465535144871713	4.834003762322211	2501	204	50	23416	AT3G59700,AT4G34410,AT5G51990,AT1G19220,AT1G71450,AT5G41750,AT1G28370,AT5G52020,AT2G34600,AT1G73965,AT1G19210,AT3G57530,AT2G44840,AT4G17615,AT1G22810,AT5G67300,AT5G45820,AT3G19580,AT3G21150,AT5G21960,AT1G33760,AT3G50060,AT2G20142,AT2G46790,AT5G49450,AT4G36950,AT1G19770,AT1G28480,AT3G17609,AT2G30020,AT2G43790,AT1G19390,AT2G17660,AT1G04770,AT5G42380,AT5G66210,AT1G09080,AT3G59350,AT3G15210,AT2G22240…
GO:BP	ethylene-activated signaling pathway	GO:0009873	0.000017577429983066535	4.755044623333067	202	315	16	23416	AT4G34410,AT1G71450,AT1G28370,AT5G52020,AT1G19210,AT2G44840,AT1G22810,AT5G21960,AT1G33760,AT3G15210,AT1G74930,AT4G17490,AT1G28360,AT5G47230,AT4G32800,AT3G24500
GO:BP	regulation of gene expression	GO:0010468	0.000019331083323069586	4.7137438072209035	3031	546	117	23416	AT2G22760,AT1G63030,AT4G34410,AT5G51990,AT1G12610,AT1G19220,AT1G71450,AT1G28370,AT5G52020,AT3G02380,AT3G12320,AT1G19210,AT1G01060,AT2G46830,AT2G20080,AT5G40790,AT2G44840,AT1G80840,AT1G74310,AT1G22810,AT5G67300,AT2G26150,AT5G62020,AT3G19580,AT3G21150,AT5G21960,AT1G33760,AT3G50060,AT2G46790,AT5G49450,AT1G28480,AT1G70000,AT3G17609,AT5G15850,AT2G43790,AT3G51910,AT1G68670,AT1G68810,AT3G23250,AT3G56290…
GO:BP	response to light intensity	GO:0009642	0.00003681355576287725	4.433992232713184	166	710	21	23416	AT1G54050,AT3G27690,AT1G74310,AT2G26150,AT5G20230,AT3G51910,AT2G22240,AT2G05100,AT4G17490,AT5G54270,AT2G29500,AT4G12400,AT3G12580,AT5G37770,AT1G27730,AT5G59820,AT1G61520,AT4G27670,AT2G45430,AT5G02120,AT5G64940
GO:BP	defense response to other organism	GO:0098542	0.00003890662525188514	4.409976438125751	1178	645	66	23416	AT3G59700,AT4G34410,AT3G57260,AT5G52020,AT1G15010,AT2G40000,AT1G80840,AT3G48520,AT4G14450,AT5G67300,AT2G01180,AT1G02660,AT1G17750,AT2G30020,AT2G33580,AT2G43790,AT2G17660,AT5G66210,AT5G56980,AT3G15210,AT2G23810,AT2G22240,AT3G55980,AT3G52400,AT2G32800,AT1G74930,AT5G06320,AT5G62570,AT3G49530,AT3G11820,AT4G20830,AT5G60890,AT1G29340,AT1G14780,AT1G66700,AT5G37770,AT2G27080,AT2G40140,AT2G46400,AT3G08870…
GO:BP	phosphorelay signal transduction system	GO:0000160	0.000049777446833907075	4.302967382825493	259	458	21	23416	AT4G34410,AT1G71450,AT1G28370,AT5G52020,AT1G19210,AT2G44840,AT1G22810,AT5G21960,AT1G33760,AT2G46790,AT3G15210,AT1G74930,AT4G17490,AT1G28360,AT5G47230,AT4G32800,AT3G24500,AT1G21910,AT1G74890,AT1G72430,AT1G64380
GO:BP	response to reactive oxygen species	GO:0000302	0.00006566174762453843	4.182687562459664	187	710	22	23416	AT1G54050,AT1G74310,AT2G26150,AT2G43790,AT3G02840,AT5G42380,AT2G22240,AT4G37610,AT4G17490,AT5G12020,AT2G29500,AT4G12400,AT1G72520,AT3G12580,AT5G37770,AT1G53540,AT5G05410,AT1G51400,AT4G27670,AT3G25190,AT5G63160,AT5G64940
GO:BP	cellular response to ethylene stimulus	GO:0071369	0.00006614619378089485	4.179495141159214	222	315	16	23416	AT4G34410,AT1G71450,AT1G28370,AT5G52020,AT1G19210,AT2G44840,AT1G22810,AT5G21960,AT1G33760,AT3G15210,AT1G74930,AT4G17490,AT1G28360,AT5G47230,AT4G32800,AT3G24500
GO:BP	aromatic compound biosynthetic process	GO:0019438	0.00010115210556545266	3.995025072597181	3335	546	123	23416	AT2G22760,AT1G63030,AT4G34410,AT5G51990,AT1G12610,AT1G19220,AT3G55580,AT1G71450,AT1G28370,AT5G52020,AT3G02380,AT3G12320,AT1G19210,AT1G01060,AT2G46830,AT2G20080,AT5G40790,AT2G44840,AT1G80840,AT2G34890,AT1G22810,AT5G67300,AT2G26150,AT5G62020,AT3G19580,AT3G21150,AT5G21960,AT1G33760,AT1G77520,AT3G50060,AT2G46790,AT5G49450,AT1G28480,AT1G70000,AT5G20230,AT3G17609,AT5G15850,AT2G43790,AT3G51910,AT1G68670…
GO:BP	circadian rhythm	GO:0007623	0.00010144042318088746	3.9937889477042496	144	719	19	23416	AT3G12320,AT1G01060,AT2G46830,AT2G46790,AT3G09600,AT3G21890,AT5G02840,AT3G54810,AT5G17300,AT5G06980,AT3G54500,AT1G80820,AT5G08330,AT3G01060,AT4G38960,AT1G18330,AT5G02120,AT5G64940,AT5G11260
GO:BP	response to organic cyclic compound	GO:0014070	0.00013940559250325072	3.8557198033930775	391	214	17	23416	AT1G01060,AT2G40000,AT2G46830,AT1G80840,AT5G67300,AT5G57560,AT3G50060,AT2G03760,AT1G28480,AT1G70000,AT1G36370,AT4G08950,AT4G37610,AT3G09600,AT2G32800,AT5G02840,AT5G06320
GO:BP	response to UV-B	GO:0010224	0.0001464849741313207	3.8342069212930117	74	547	12	23416	AT4G15480,AT2G01180,AT3G17609,AT2G43790,AT3G21890,AT5G23730,AT1G35210,AT5G59820,AT5G05410,AT1G51400,AT3G45640,AT2G22880
GO:BP	regulation of cellular metabolic process	GO:0031323	0.00021200292262701752	3.673658151938997	3523	546	127	23416	AT2G22760,AT1G63030,AT4G34410,AT5G51990,AT1G12610,AT1G19220,AT3G55580,AT1G71450,AT1G28370,AT5G52020,AT3G27690,AT3G02380,AT3G12320,AT1G19210,AT1G01060,AT2G46830,AT2G20080,AT5G40790,AT2G44840,AT1G80840,AT1G74310,AT1G22810,AT5G67300,AT2G26150,AT5G62020,AT3G19580,AT3G21150,AT5G21960,AT1G33760,AT3G50060,AT2G46790,AT5G49450,AT4G36950,AT1G28480,AT1G70000,AT5G20230,AT3G17609,AT5G15850,AT3G51910,AT1G68670…
GO:BP	response to auxin	GO:0009733	0.00021314774240639806	3.6713192629025446	433	651	33	23416	AT4G34410,AT1G19220,AT1G01060,AT2G46830,AT4G22620,AT5G67300,AT5G57560,AT3G50060,AT1G70000,AT3G23250,AT2G22240,AT4G37610,AT3G09600,AT5G54490,AT5G02840,AT4G11280,AT5G17300,AT5G47230,AT5G37770,AT5G08640,AT4G37260,AT1G72430,AT4G14550,AT3G15540,AT3G01220,AT4G27280,AT5G62470,AT2G34650,AT5G57770,AT4G23570,AT3G09870,AT5G18030,AT5G63160
GO:BP	photosynthesis, light harvesting	GO:0009765	0.00021693537973562169	3.6636696136338682	39	721	10	23416	AT3G27690,AT2G05100,AT5G54270,AT2G34430,AT1G29930,AT1G75690,AT1G61520,AT1G29920,AT4G10340,AT1G15820
GO:BP	rhythmic process	GO:0048511	0.0002676582890908971	3.572419302436748	153	719	19	23416	AT3G12320,AT1G01060,AT2G46830,AT2G46790,AT3G09600,AT3G21890,AT5G02840,AT3G54810,AT5G17300,AT5G06980,AT3G54500,AT1G80820,AT5G08330,AT3G01060,AT4G38960,AT1G18330,AT5G02120,AT5G64940,AT5G11260
GO:BP	regulation of cellular process	GO:0050794	0.0002830092265650778	3.548199405532313	5667	546	184	23416	AT2G22760,AT1G63030,AT3G59700,AT4G34410,AT5G51990,AT1G12610,AT1G19220,AT3G55580,AT1G71450,AT5G41750,AT1G28370,AT5G52020,AT2G34600,AT3G27690,AT3G02380,AT3G12320,AT1G19210,AT3G57530,AT1G01060,AT2G46830,AT2G20080,AT5G40790,AT2G44840,AT1G80840,AT4G17615,AT1G74310,AT1G22810,AT1G70140,AT5G67300,AT5G45820,AT2G26150,AT5G62020,AT3G19580,AT3G21150,AT5G21960,AT1G33760,AT3G50060,AT2G20142,AT2G46790,AT5G49450…
GO:BP	regulation of nitrogen compound metabolic process	GO:0051171	0.00038369441501529856	3.4160145222655616	3310	546	120	23416	AT2G22760,AT1G63030,AT4G34410,AT5G51990,AT1G12610,AT1G19220,AT1G71450,AT1G28370,AT5G52020,AT3G02380,AT3G12320,AT1G19210,AT1G01060,AT2G46830,AT2G20080,AT5G40790,AT2G44840,AT1G80840,AT1G74310,AT1G22810,AT5G67300,AT2G26150,AT5G62020,AT3G19580,AT3G21150,AT5G21960,AT1G33760,AT3G50060,AT2G46790,AT5G49450,AT4G36950,AT1G28480,AT1G70000,AT3G17609,AT5G15850,AT3G51910,AT1G68670,AT1G68810,AT3G23250,AT1G36370…
GO:BP	nucleobase-containing compound biosynthetic process	GO:0034654	0.0004196094602021424	3.3771547290884083	3032	546	112	23416	AT2G22760,AT1G63030,AT4G34410,AT5G51990,AT1G12610,AT1G19220,AT1G71450,AT1G28370,AT5G52020,AT3G02380,AT3G12320,AT1G19210,AT1G01060,AT2G46830,AT2G20080,AT5G40790,AT2G44840,AT1G80840,AT2G34890,AT1G22810,AT5G67300,AT2G26150,AT5G62020,AT3G19580,AT3G21150,AT5G21960,AT1G33760,AT3G50060,AT2G46790,AT5G49450,AT1G28480,AT1G70000,AT3G17609,AT5G15850,AT3G51910,AT1G68670,AT1G68810,AT3G23250,AT3G56290,AT3G15210…
GO:BP	heterocycle biosynthetic process	GO:0018130	0.0005037657306971348	3.297771379266127	3261	667	139	23416	AT2G22760,AT1G63030,AT4G34410,AT5G51990,AT1G12610,AT1G19220,AT1G71450,AT1G28370,AT5G52020,AT3G02380,AT3G12320,AT1G19210,AT1G01060,AT2G46830,AT2G20080,AT5G40790,AT2G44840,AT1G80840,AT2G34890,AT1G22810,AT5G67300,AT2G26150,AT5G62020,AT3G19580,AT3G21150,AT5G21960,AT1G33760,AT3G50060,AT2G46790,AT5G49450,AT1G28480,AT1G70000,AT3G17609,AT5G15850,AT2G43790,AT3G51910,AT1G68670,AT1G68810,AT3G23250,AT3G56290…
GO:BP	defense response to bacterium	GO:0042742	0.000891889873517345	3.049688767009927	448	607	31	23416	AT3G59700,AT2G40000,AT1G80840,AT5G67300,AT1G17750,AT2G43790,AT5G66210,AT5G56980,AT3G15210,AT2G23810,AT2G22240,AT2G32800,AT5G06320,AT5G62570,AT1G66700,AT2G27080,AT2G46400,AT3G08870,AT5G22250,AT4G23190,AT3G14210,AT5G24660,AT4G02420,AT5G01560,AT4G31550,AT3G45640,AT4G23180,AT3G56710,AT1G19180,AT5G49520,AT5G39670
GO:BP	secondary metabolic process	GO:0019748	0.000958716939159424	3.0183095991975315	398	722	32	23416	AT1G63030,AT5G51990,AT1G12610,AT3G55580,AT5G52020,AT5G20230,AT2G43790,AT1G04770,AT1G49860,AT3G28920,AT5G60890,AT1G71030,AT4G01070,AT1G80820,AT1G69930,AT3G14210,AT4G37260,AT4G30210,AT3G25180,AT5G48850,AT1G10360,AT3G16400,AT3G45640,AT5G62470,AT1G74090,AT3G09260,AT1G52340,AT1G27130,AT3G11430,AT1G69920,AT4G37340,AT4G37980
GO:BP	organic cyclic compound biosynthetic process	GO:1901362	0.0011191131392588565	2.9511260052750643	3457	667	144	23416	AT2G22760,AT1G63030,AT4G34410,AT5G51990,AT1G12610,AT1G19220,AT3G55580,AT1G71450,AT1G28370,AT5G52020,AT3G02380,AT3G12320,AT1G19210,AT1G01060,AT2G46830,AT2G20080,AT5G40790,AT2G44840,AT1G80840,AT2G34890,AT1G22810,AT5G67300,AT2G26150,AT5G62020,AT3G19580,AT3G21150,AT5G21960,AT1G33760,AT3G50060,AT2G46790,AT5G49450,AT1G28480,AT1G70000,AT5G20230,AT3G17609,AT5G15850,AT2G43790,AT3G51910,AT1G68670,AT1G68810…
GO:BP	regulation of primary metabolic process	GO:0080090	0.001138826299753277	2.943542511927404	3380	546	120	23416	AT2G22760,AT1G63030,AT4G34410,AT5G51990,AT1G12610,AT1G19220,AT1G71450,AT1G28370,AT5G52020,AT3G02380,AT3G12320,AT1G19210,AT1G01060,AT2G46830,AT2G20080,AT5G40790,AT2G44840,AT1G80840,AT1G74310,AT1G22810,AT5G67300,AT2G26150,AT5G62020,AT3G19580,AT3G21150,AT5G21960,AT1G33760,AT3G50060,AT2G46790,AT5G49450,AT4G36950,AT1G28480,AT1G70000,AT3G17609,AT5G15850,AT3G51910,AT1G68670,AT1G68810,AT3G23250,AT1G36370…
GO:BP	protein-chromophore linkage	GO:0018298	0.0014145083487360017	2.8493944848989123	47	721	10	23416	AT3G27690,AT2G05100,AT5G54270,AT2G34430,AT1G29930,AT1G61520,AT1G29920,AT5G02120,AT4G10340,AT1G15820
GO:BP	intracellular signal transduction	GO:0035556	0.0015321691188393302	2.8146932951962054	748	213	22	23416	AT4G34410,AT1G71450,AT1G28370,AT5G52020,AT1G19210,AT3G57530,AT2G44840,AT4G17615,AT1G22810,AT5G21960,AT1G33760,AT2G46790,AT4G36950,AT2G43790,AT5G42380,AT5G66210,AT3G15210,AT1G74930,AT3G05490,AT4G17490,AT2G29110,AT1G28360
GO:BP	cellular response to oxygen-containing compound	GO:1901701	0.0023623460492087456	2.626656484261097	803	204	22	23416	AT5G51990,AT2G34600,AT3G27690,AT3G57530,AT4G17615,AT1G22810,AT5G67300,AT3G19580,AT5G49450,AT1G28480,AT2G30020,AT2G33580,AT2G43790,AT1G36370,AT5G66210,AT3G15210,AT1G74950,AT2G05100,AT5G66070,AT3G07360,AT2G32800,AT2G29110
GO:BP	regulation of metabolic process	GO:0019222	0.0030256946944461046	2.519174896275391	3849	546	131	23416	AT2G22760,AT1G63030,AT4G34410,AT5G51990,AT1G12610,AT1G19220,AT3G55580,AT1G71450,AT1G28370,AT5G52020,AT3G27690,AT3G02380,AT3G12320,AT1G19210,AT1G01060,AT2G46830,AT2G20080,AT5G40790,AT2G44840,AT1G80840,AT1G74310,AT1G22810,AT5G67300,AT2G26150,AT5G62020,AT3G19580,AT3G21150,AT5G21960,AT1G33760,AT3G50060,AT2G46790,AT5G49450,AT4G36950,AT1G28480,AT1G70000,AT5G20230,AT3G17609,AT5G15850,AT2G43790,AT3G51910…
GO:BP	photosynthesis, light harvesting in photosystem II	GO:0009769	0.003226428846229999	2.491277908127109	4	215	3	23416	AT3G27690,AT2G05100,AT5G54270
GO:BP	negative regulation of circadian rhythm	GO:0042754	0.003963749863291538	2.401893759943532	3	364	3	23416	AT1G01060,AT2G46830,AT1G80820
GO:BP	response to UV	GO:0009411	0.0046470410297674986	2.3328234930208187	119	547	13	23416	AT4G15480,AT2G01180,AT3G17609,AT2G43790,AT3G21890,AT3G17611,AT5G23730,AT1G35210,AT5G59820,AT5G05410,AT1G51400,AT3G45640,AT2G22880
GO:BP	cellular response to sulfur starvation	GO:0010438	0.005784209375245616	2.237755994954871	7	472	4	23416	AT1G04770,AT5G60890,AT5G24660,AT5G48850
GO:BP	fruit ripening	GO:0009835	0.006082647161975541	2.215907375062859	10	307	4	23416	AT4G08040,AT4G26200,AT4G11280,AT4G37770
GO:BP	cellular response to alcohol	GO:0097306	0.006213766830887104	2.206645047501869	322	536	22	23416	AT5G51990,AT3G27690,AT3G57530,AT4G17615,AT5G67300,AT3G19580,AT2G30020,AT2G43790,AT5G66210,AT2G05100,AT5G66070,AT3G07360,AT1G62660,AT3G63060,AT5G59550,AT1G01720,AT3G11410,AT5G67450,AT5G01560,AT3G45640,AT5G62470,AT3G20410
GO:BP	cellular response to abscisic acid stimulus	GO:0071215	0.006213766830887104	2.206645047501869	322	536	22	23416	AT5G51990,AT3G27690,AT3G57530,AT4G17615,AT5G67300,AT3G19580,AT2G30020,AT2G43790,AT5G66210,AT2G05100,AT5G66070,AT3G07360,AT1G62660,AT3G63060,AT5G59550,AT1G01720,AT3G11410,AT5G67450,AT5G01560,AT3G45640,AT5G62470,AT3G20410
GO:BP	immune system process	GO:0002376	0.006640601754714374	2.1777925641695393	442	645	30	23416	AT3G57260,AT2G40000,AT4G14450,AT2G01180,AT2G33580,AT2G43790,AT2G17660,AT3G15210,AT2G22240,AT5G06320,AT5G62570,AT3G49530,AT1G29340,AT1G14780,AT5G37770,AT2G35930,AT4G23190,AT1G28380,AT3G52450,AT3G23170,AT4G31550,AT3G19380,AT1G29690,AT3G45640,AT5G24590,AT3G50470,AT3G56710,AT4G23570,AT2G47130,AT1G27130
GO:BP	regulation of macromolecule metabolic process	GO:0060255	0.008185616075558186	2.086948628634879	3591	546	122	23416	AT2G22760,AT1G63030,AT4G34410,AT5G51990,AT1G12610,AT1G19220,AT1G71450,AT1G28370,AT5G52020,AT3G02380,AT3G12320,AT1G19210,AT1G01060,AT2G46830,AT2G20080,AT5G40790,AT2G44840,AT1G80840,AT1G74310,AT1G22810,AT5G67300,AT2G26150,AT5G62020,AT3G19580,AT3G21150,AT5G21960,AT1G33760,AT3G50060,AT2G46790,AT5G49450,AT4G36950,AT1G28480,AT1G70000,AT3G17609,AT5G15850,AT2G43790,AT3G51910,AT1G68670,AT1G68810,AT3G23250…
GO:BP	1-aminocyclopropane-1-carboxylate biosynthetic process	GO:0042218	0.009459719923871297	2.0241217216656318	11	307	4	23416	AT4G08040,AT4G26200,AT4G11280,AT4G37770
GO:BP	cellular response to heat	GO:0034605	0.010963110770710178	1.9600661977800513	82	619	11	23416	AT2G26150,AT5G62020,AT3G51910,AT1G09080,AT5G48570,AT1G16030,AT3G12580,AT1G21910,AT2G21320,AT3G22830,AT1G76560
GO:BP	regulation of biological process	GO:0050789	0.011287503183848035	1.947402114177668	6275	225	90	23416	AT2G22760,AT1G63030,AT3G59700,AT4G34410,AT5G51990,AT1G12610,AT1G19220,AT3G55580,AT1G71450,AT5G41750,AT1G28370,AT5G52020,AT2G34600,AT3G27690,AT3G02380,AT3G12320,AT1G19210,AT3G57530,AT1G01060,AT2G46830,AT2G20080,AT5G40790,AT2G44840,AT1G80840,AT4G17615,AT1G74310,AT1G22810,AT1G70140,AT5G67300,AT5G45820,AT2G26150,AT5G62020,AT3G19580,AT3G21150,AT5G21960,AT1G33760,AT3G50060,AT1G02660,AT2G20142,AT2G46790…
GO:BP	regulation of secondary metabolic process	GO:0043455	0.012411276682235661	1.9061835426324438	66	16	3	23416	AT1G63030,AT1G12610,AT3G55580
GO:BP	regulation of gibberellin biosynthetic process	GO:0010371	0.01358670247897004	1.8668859346552509	10	13	2	23416	AT1G63030,AT1G12610
GO:BP	1-aminocyclopropane-1-carboxylate metabolic process	GO:0018871	0.014043080767699898	1.852537606334373	12	307	4	23416	AT4G08040,AT4G26200,AT4G11280,AT4G37770
GO:BP	abscisic acid-activated signaling pathway	GO:0009738	0.015507781294050576	1.8094503324685909	292	723	24	23416	AT5G51990,AT3G57530,AT4G17615,AT5G67300,AT3G19580,AT2G30020,AT2G43790,AT5G66210,AT5G66070,AT3G07360,AT1G62660,AT3G63060,AT5G59550,AT1G01720,AT3G11410,AT5G67450,AT5G01560,AT3G45640,AT5G62470,AT3G20410,AT1G69260,AT3G26000,AT5G11260,AT5G59220
GO:BP	cellular ketone metabolic process	GO:0042180	0.018026381649291576	1.7440914384161756	150	50	5	23416	AT1G63030,AT4G34410,AT1G12610,AT2G40000,AT3G55840
GO:BP	regulation of cellular ketone metabolic process	GO:0010565	0.0203439456152812	1.6915648138142019	97	13	3	23416	AT1G63030,AT4G34410,AT1G12610
GO:BP	biological regulation	GO:0065007	0.020877318424347067	1.6803252848028434	7043	219	95	23416	AT2G22760,AT1G63030,AT3G59700,AT4G34410,AT5G51990,AT1G12610,AT1G19220,AT3G55580,AT1G71450,AT5G41750,AT1G28370,AT5G52020,AT2G34600,AT3G27690,AT3G02380,AT3G17130,AT3G12320,AT1G19210,AT3G57530,AT1G01060,AT2G46830,AT2G20080,AT5G40790,AT2G44840,AT1G80840,AT4G17615,AT1G74310,AT1G22810,AT1G70140,AT5G67300,AT5G45820,AT2G26150,AT5G62020,AT3G19580,AT3G21150,AT5G21960,AT1G33760,AT3G50060,AT1G02660,AT2G20142…
GO:BP	cellular response to cold	GO:0070417	0.02267006743590232	1.6445471879900817	34	603	7	23416	AT3G55580,AT5G20230,AT3G49530,AT1G20823,AT1G21910,AT3G09260,AT3G61580
GO:BP	cellular response to jasmonic acid stimulus	GO:0071395	0.02356740178841345	1.6276882940625557	101	195	7	23416	AT2G34600,AT5G67300,AT1G28480,AT2G43790,AT3G15210,AT1G74950,AT2G32800
GO:BP	regulation of defense response	GO:0031347	0.02789100596852104	1.5545358213847646	272	240	12	23416	AT3G59700,AT2G34600,AT1G80840,AT5G67300,AT1G02660,AT2G43790,AT2G17660,AT5G66210,AT3G15210,AT1G74950,AT5G62570,AT3G11820
GO:BP	regulation of response to stimulus	GO:0048583	0.027953776208721092	1.5535595160124716	770	248	22	23416	AT3G59700,AT4G34410,AT2G34600,AT1G80840,AT5G67300,AT3G50060,AT1G02660,AT1G19770,AT3G17609,AT2G43790,AT2G17660,AT5G66210,AT3G15210,AT1G74950,AT5G66070,AT5G52050,AT1G70170,AT5G62570,AT4G27310,AT3G49530,AT3G11820,AT2G31380
GO:BP	innate immune response	GO:0045087	0.031036455259635498	1.5081278862891496	386	645	26	23416	AT3G57260,AT2G40000,AT4G14450,AT2G01180,AT2G33580,AT2G43790,AT2G17660,AT3G15210,AT5G06320,AT5G62570,AT3G49530,AT1G29340,AT1G14780,AT5G37770,AT4G23190,AT1G28380,AT3G23170,AT4G31550,AT3G19380,AT1G29690,AT3G45640,AT3G50470,AT3G56710,AT4G23570,AT2G47130,AT1G27130
GO:BP	response to freezing	GO:0050826	0.0325118566908542	1.4879582280563939	28	525	6	23416	AT1G12610,AT3G55580,AT2G43790,AT1G21910,AT1G16670,AT3G45640
GO:BP	regulation of small molecule metabolic process	GO:0062012	0.04449694802140461	1.3516697756014817	126	13	3	23416	AT1G63030,AT4G34410,AT1G12610
GO:BP	tryptophan catabolic process to kynurenine	GO:0019441	0.047342341482984766	1.3247502663057042	5	50	2	23416	AT2G40000,AT3G55840
GO:CC	photosystem I	GO:0009522	0.0029751560314555635	2.5264902528520032	44	721	9	21213	AT3G27690,AT2G05100,AT5G54270,AT2G34430,AT1G29930,AT1G61520,AT1G29920,AT4G10340,AT1G15820
GO:CC	light-harvesting complex	GO:0030076	0.0034838207837182104	2.457944194262585	6	697	4	21213	AT3G27690,AT2G05100,AT5G54270,AT4G10340
GO:CC	thylakoid light-harvesting complex	GO:0009503	0.0034838207837182104	2.457944194262585	6	697	4	21213	AT3G27690,AT2G05100,AT5G54270,AT4G10340
GO:CC	PSII associated light-harvesting complex II	GO:0009517	0.0034838207837182104	2.457944194262585	6	697	4	21213	AT3G27690,AT2G05100,AT5G54270,AT4G10340
GO:CC	photosystem II	GO:0009523	0.011903892498548911	1.924311003799021	77	721	11	21213	AT3G27690,AT2G05100,AT5G54270,AT2G34430,AT1G29930,AT1G61520,AT1G29920,AT5G02120,AT4G10340,AT1G06680,AT1G15820
GO:CC	calcium channel complex	GO:0034704	0.04302434422186803	1.3662857404773232	6	468	3	21213	AT5G66650,AT1G09575,AT4G36820
GO:CC	uniplex complex	GO:1990246	0.04302434422186803	1.3662857404773232	6	468	3	21213	AT5G66650,AT1G09575,AT4G36820
