# Supplementary material for: BrPP5.2 Overexpression Confers Heat Shock Tolerance in Transgenic Brassica rapa through Inherent Chaperone Activity, Induced Glucosinolate Biosynthesis, and Differential Regulation of Abiotic Stress Response Genes
Source: Int J Mol Sci. 2021 Jun 16;22(12):6437. doi: 10.3390/ijms22126437 (PMC8234546; doi:10.3390/ijms22126437)
Supplement: Supplementary file 1 [file ijms-22-06437-s001.zip › results for 652up DEGs.csv]

source	term_name	term_id	adjusted_p_value	negative_log10_of_adjusted_p_value	term_size	query_size	intersection_size	effective_domain_size	intersections
GO:MF	chitin binding	GO:0008061	0.000004024212110887262	5.395319136262238	25	138	6	21188	AT3G04720,AT3G12500,AT2G43620,AT2G43570,AT2G43590,AT4G19810
GO:MF	chitinase activity	GO:0004568	0.00015415205502776678	3.812050681243861	24	138	5	21188	AT3G12500,AT2G43620,AT2G43570,AT2G43590,AT4G19810
GO:MF	monooxygenase activity	GO:0004497	0.002878239130815712	2.5408731267026052	323	531	23	21188	AT3G14690,AT5G24150,AT1G19320,AT2G30750,AT3G14620,AT1G12200,AT2G45510,AT2G30490,AT3G30180,AT1G16410,AT3G56630,AT4G13770,AT2G45570,AT1G19250,AT3G03470,AT3G20080,AT5G36220,AT3G26170,AT5G52320,AT1G57750,AT4G31500,AT1G13080,AT3G26210
GO:MF	desulfoglucosinolate sulfotransferase activity	GO:0047364	0.0033380073006854904	2.476512717793394	3	443	3	21188	AT1G74090,AT1G18590,AT1G74100
GO:MF	glutathione transferase activity	GO:0004364	0.01620251162020859	1.7904176584049358	59	468	8	21188	AT4G02520,AT1G74590,AT1G69930,AT2G29470,AT2G02930,AT2G30860,AT1G17180,AT2G29460
GO:MF	nitrate transmembrane transporter activity	GO:0015112	0.04611377866728584	1.3361692892506967	27	205	4	21188	AT1G22550,AT4G21680,AT1G12110,AT1G08090
GO:MF	dioxygenase activity	GO:0051213	0.04783106249711086	1.3202899718040304	171	474	13	21188	AT3G20810,AT1G06640,AT2G38240,AT1G12010,AT3G21420,AT3G45140,AT5G05600,AT1G19250,AT2G19590,AT4G03070,AT2G30840,AT5G59540,AT1G52810
GO:BP	response to external stimulus	GO:0009605	1.5980692499049652e-12	11.796404405122175	1873	493	94	23416	AT2G40080,AT1G16510,AT5G42900,AT2G46450,AT2G47130,AT5G42680,AT3G04720,AT4G19700,AT4G39830,AT2G40750,AT5G55450,AT1G74080,AT2G13810,AT2G45220,AT4G02520,AT1G12200,AT1G72290,AT3G12500,AT3G57240,AT3G25882,AT3G57260,AT2G43570,AT1G60960,AT5G21100,AT2G01340,AT1G14040,AT1G12010,AT4G23260,AT4G12480,AT3G45140,AT2G18660,AT1G53990,AT5G13080,AT1G79680,AT2G14580,AT1G19670,AT2G02990,AT1G21250,AT5G02750,AT2G21660…
GO:BP	response to external biotic stimulus	GO:0043207	5.860165781655407e-11	10.232090097797654	1426	284	54	23416	AT5G42900,AT2G46450,AT2G47130,AT3G04720,AT4G19700,AT4G39830,AT2G40750,AT5G55450,AT1G74080,AT2G13810,AT2G45220,AT4G02520,AT1G12200,AT1G72290,AT3G12500,AT3G57240,AT3G25882,AT3G57260,AT2G43570,AT1G60960,AT5G21100,AT2G01340,AT1G12010,AT4G23260,AT4G12480,AT3G45140,AT2G18660,AT1G53990,AT1G79680,AT2G14580,AT1G19670,AT1G21250,AT2G21660,AT4G16260,AT5G13320,AT1G73260,AT1G16410,AT5G61420,AT2G02930,AT4G16740…
GO:BP	response to other organism	GO:0051707	5.860165781655407e-11	10.232090097797654	1426	284	54	23416	AT5G42900,AT2G46450,AT2G47130,AT3G04720,AT4G19700,AT4G39830,AT2G40750,AT5G55450,AT1G74080,AT2G13810,AT2G45220,AT4G02520,AT1G12200,AT1G72290,AT3G12500,AT3G57240,AT3G25882,AT3G57260,AT2G43570,AT1G60960,AT5G21100,AT2G01340,AT1G12010,AT4G23260,AT4G12480,AT3G45140,AT2G18660,AT1G53990,AT1G79680,AT2G14580,AT1G19670,AT1G21250,AT2G21660,AT4G16260,AT5G13320,AT1G73260,AT1G16410,AT5G61420,AT2G02930,AT4G16740…
GO:BP	response to chemical	GO:0042221	7.151160200091955e-11	10.145623492797247	3407	539	144	23416	AT5G19880,AT1G16510,AT5G42900,AT3G48360,AT4G22620,AT2G36210,AT5G03310,AT3G04720,AT4G19700,AT4G33980,AT2G40750,AT2G13810,AT5G46590,AT4G24120,AT4G02520,AT4G39070,AT5G07580,AT2G38940,AT5G20630,AT1G74590,AT4G34800,AT1G69930,AT2G38240,AT3G12500,AT2G43570,AT5G21100,AT1G12010,AT2G04050,AT4G12480,AT3G45140,AT1G79680,AT2G42810,AT1G53230,AT2G14580,AT4G19810,AT4G04490,AT5G07010,AT2G29470,AT5G56860,AT2G31230…
GO:BP	response to biotic stimulus	GO:0009607	8.451521085724604e-11	10.073065120673201	1439	284	54	23416	AT5G42900,AT2G46450,AT2G47130,AT3G04720,AT4G19700,AT4G39830,AT2G40750,AT5G55450,AT1G74080,AT2G13810,AT2G45220,AT4G02520,AT1G12200,AT1G72290,AT3G12500,AT3G57240,AT3G25882,AT3G57260,AT2G43570,AT1G60960,AT5G21100,AT2G01340,AT1G12010,AT4G23260,AT4G12480,AT3G45140,AT2G18660,AT1G53990,AT1G79680,AT2G14580,AT1G19670,AT1G21250,AT2G21660,AT4G16260,AT5G13320,AT1G73260,AT1G16410,AT5G61420,AT2G02930,AT4G16740…
GO:BP	interspecies interaction between organisms	GO:0044419	2.274585497913247e-10	9.643097734114713	1475	284	54	23416	AT5G42900,AT2G46450,AT2G47130,AT3G04720,AT4G19700,AT4G39830,AT2G40750,AT5G55450,AT1G74080,AT2G13810,AT2G45220,AT4G02520,AT1G12200,AT1G72290,AT3G12500,AT3G57240,AT3G25882,AT3G57260,AT2G43570,AT1G60960,AT5G21100,AT2G01340,AT1G12010,AT4G23260,AT4G12480,AT3G45140,AT2G18660,AT1G53990,AT1G79680,AT2G14580,AT1G19670,AT1G21250,AT2G21660,AT4G16260,AT5G13320,AT1G73260,AT1G16410,AT5G61420,AT2G02930,AT4G16740…
GO:BP	response to organic substance	GO:0010033	5.63940316577733e-10	9.248766856216138	2313	539	108	23416	AT1G16510,AT5G42900,AT3G48360,AT4G22620,AT2G36210,AT5G03310,AT3G04720,AT4G19700,AT4G33980,AT2G40750,AT2G13810,AT5G46590,AT4G02520,AT4G39070,AT5G07580,AT2G38940,AT5G20630,AT4G34800,AT2G38240,AT2G43570,AT1G12010,AT4G12480,AT3G45140,AT1G79680,AT1G53230,AT2G14580,AT4G19810,AT4G04490,AT5G07010,AT5G56860,AT2G31230,AT4G38860,AT1G19840,AT1G30260,AT1G21250,AT4G12030,AT2G21660,AT1G12110,AT5G13320,AT1G15780…
GO:BP	secondary metabolic process	GO:0019748	1.3879159228585533e-9	8.857636841766281	398	497	35	23416	AT3G60120,AT2G43000,AT4G02520,AT1G74590,AT1G69930,AT5G54160,AT2G29470,AT3G19710,AT4G12030,AT1G21120,AT2G30490,AT4G19370,AT1G16410,AT5G61420,AT2G02930,AT4G13770,AT1G32100,AT5G14200,AT5G23010,AT2G30860,AT1G74090,AT5G13330,AT4G37990,AT1G18590,AT1G17180,AT1G21100,AT3G11580,AT5G36220,AT2G30840,AT3G50740,AT1G74100,AT5G59540,AT2G29460,AT4G31500,AT5G61780
GO:BP	response to stimulus	GO:0050896	2.1106408177321383e-9	8.6755856672841	6807	382	175	23416	AT1G65800,AT5G19880,AT2G40080,AT3G60120,AT1G16510,AT5G42900,AT3G07650,AT2G46450,AT2G47130,AT3G48360,AT4G22620,AT5G42680,AT2G36210,AT5G03310,AT3G04720,AT4G19700,AT4G33980,AT4G39830,AT2G40750,AT5G55450,AT1G74080,AT2G13810,AT2G43000,AT2G45220,AT5G46590,AT4G24120,AT4G02520,AT4G39070,AT5G07580,AT1G12200,AT2G38940,AT5G20630,AT1G72290,AT5G18470,AT1G74590,AT4G34800,AT1G69930,AT2G38240,AT2G16660,AT3G12500…
GO:BP	response to bacterium	GO:0009617	2.4068793969689097e-8	7.61854567064858	526	438	36	23416	AT2G46450,AT2G47130,AT3G04720,AT4G19700,AT2G40750,AT2G13810,AT2G45220,AT4G02520,AT3G57240,AT4G23260,AT4G12480,AT3G45140,AT1G53990,AT1G79680,AT2G14580,AT1G19670,AT5G13320,AT1G73260,AT5G61420,AT5G22570,AT5G06740,AT4G23270,AT4G23130,AT5G01900,AT1G19250,AT2G30860,AT3G45330,AT4G37990,AT3G28930,AT1G20160,AT4G23280,AT3G10525,AT3G53180,AT5G48380,AT4G39090,AT1G14370
GO:BP	response to oxygen-containing compound	GO:1901700	3.86746112757286e-8	7.412574042765104	1812	539	87	23416	AT5G42900,AT3G48360,AT4G19700,AT4G33980,AT2G40750,AT2G13810,AT5G46590,AT4G39070,AT2G38940,AT2G38240,AT5G21100,AT1G12010,AT4G12480,AT3G45140,AT1G79680,AT2G14580,AT4G19810,AT4G04490,AT5G07010,AT5G56860,AT2G31230,AT1G21250,AT4G12030,AT4G21680,AT2G21660,AT1G12110,AT5G13320,AT4G21870,AT1G08090,AT1G15780,AT1G73260,AT5G61420,AT4G16740,AT5G22570,AT3G14395,AT1G69530,AT4G23270,AT2G41940,AT5G59780,AT1G15520…
GO:BP	response to hormone	GO:0009725	1.313933027209858e-7	6.881426770738534	1839	535	86	23416	AT1G16510,AT5G42900,AT3G48360,AT4G22620,AT2G36210,AT5G03310,AT3G04720,AT4G19700,AT4G33980,AT2G40750,AT5G46590,AT4G02520,AT4G39070,AT5G07580,AT2G38940,AT5G20630,AT4G34800,AT2G38240,AT1G12010,AT4G12480,AT3G45140,AT1G53230,AT2G14580,AT4G19810,AT4G04490,AT5G07010,AT5G56860,AT2G31230,AT4G38860,AT1G19840,AT1G30260,AT4G12030,AT2G21660,AT1G12110,AT5G61420,AT4G16740,AT3G14395,AT1G69530,AT2G41940,AT5G59780…
GO:BP	glucosinolate biosynthetic process	GO:0019761	2.6192475866224774e-7	6.58182344757637	60	491	13	23416	AT3G19710,AT4G12030,AT1G16410,AT5G61420,AT4G13770,AT5G14200,AT5G23010,AT1G74090,AT1G18590,AT2G30840,AT1G74100,AT5G59540,AT4G31500
GO:BP	glycosinolate biosynthetic process	GO:0019758	2.6192475866224774e-7	6.58182344757637	60	491	13	23416	AT3G19710,AT4G12030,AT1G16410,AT5G61420,AT4G13770,AT5G14200,AT5G23010,AT1G74090,AT1G18590,AT2G30840,AT1G74100,AT5G59540,AT4G31500
GO:BP	S-glycoside biosynthetic process	GO:0016144	2.6192475866224774e-7	6.58182344757637	60	491	13	23416	AT3G19710,AT4G12030,AT1G16410,AT5G61420,AT4G13770,AT5G14200,AT5G23010,AT1G74090,AT1G18590,AT2G30840,AT1G74100,AT5G59540,AT4G31500
GO:BP	response to jasmonic acid	GO:0009753	3.1165858139199114e-7	6.5063209104858295	247	520	25	23416	AT3G48360,AT2G40750,AT2G38240,AT3G45140,AT2G14580,AT4G19810,AT5G07010,AT4G12030,AT5G61420,AT4G16740,AT3G14395,AT5G59780,AT1G15520,AT4G23600,AT5G05600,AT5G14200,AT5G13330,AT3G16470,AT3G15500,AT1G74100,AT5G15310,AT3G15510,AT2G24850,AT2G36890,AT5G64810
GO:BP	response to endogenous stimulus	GO:0009719	3.635875630161897e-7	6.4393909808016065	1877	535	86	23416	AT1G16510,AT5G42900,AT3G48360,AT4G22620,AT2G36210,AT5G03310,AT3G04720,AT4G19700,AT4G33980,AT2G40750,AT5G46590,AT4G02520,AT4G39070,AT5G07580,AT2G38940,AT5G20630,AT4G34800,AT2G38240,AT1G12010,AT4G12480,AT3G45140,AT1G53230,AT2G14580,AT4G19810,AT4G04490,AT5G07010,AT5G56860,AT2G31230,AT4G38860,AT1G19840,AT1G30260,AT4G12030,AT2G21660,AT1G12110,AT5G61420,AT4G16740,AT3G14395,AT1G69530,AT2G41940,AT5G59780…
GO:BP	S-glycoside metabolic process	GO:0016143	6.801477649684886e-7	6.1673967247364905	155	491	19	23416	AT3G60120,AT3G19710,AT4G12030,AT1G21120,AT1G16410,AT5G61420,AT4G13770,AT5G14200,AT5G23010,AT1G74090,AT5G13330,AT1G18590,AT1G21100,AT3G11580,AT5G36220,AT2G30840,AT1G74100,AT5G59540,AT4G31500
GO:BP	glycosinolate metabolic process	GO:0019757	6.801477649684886e-7	6.1673967247364905	155	491	19	23416	AT3G60120,AT3G19710,AT4G12030,AT1G21120,AT1G16410,AT5G61420,AT4G13770,AT5G14200,AT5G23010,AT1G74090,AT5G13330,AT1G18590,AT1G21100,AT3G11580,AT5G36220,AT2G30840,AT1G74100,AT5G59540,AT4G31500
GO:BP	glucosinolate metabolic process	GO:0019760	6.801477649684886e-7	6.1673967247364905	155	491	19	23416	AT3G60120,AT3G19710,AT4G12030,AT1G21120,AT1G16410,AT5G61420,AT4G13770,AT5G14200,AT5G23010,AT1G74090,AT5G13330,AT1G18590,AT1G21100,AT3G11580,AT5G36220,AT2G30840,AT1G74100,AT5G59540,AT4G31500
GO:BP	response to salicylic acid	GO:0009751	0.0000010151014686706782	5.993490543877641	232	260	17	23416	AT3G48360,AT2G40750,AT2G13810,AT1G79680,AT2G14580,AT1G21250,AT5G13320,AT1G15780,AT1G73260,AT5G61420,AT5G22570,AT3G14395,AT4G23270,AT5G59780,AT1G15520,AT4G23130,AT5G01900
GO:BP	circadian rhythm	GO:0007623	0.0000012572873158142435	5.900565465819013	144	108	10	23416	AT3G20810,AT2G40080,AT5G42900,AT3G07650,AT3G48360,AT3G46640,AT4G33980,AT3G14620,AT2G18915,AT5G59570
GO:BP	rhythmic process	GO:0048511	0.000002270634651012325	5.643852738881846	153	108	10	23416	AT3G20810,AT2G40080,AT5G42900,AT3G07650,AT3G48360,AT3G46640,AT4G33980,AT3G14620,AT2G18915,AT5G59570
GO:BP	defense response	GO:0006952	0.0000028717305085228553	5.541856317964868	1603	306	51	23416	AT2G46450,AT2G47130,AT3G04720,AT4G19700,AT4G39830,AT2G40750,AT5G55450,AT2G13810,AT2G45220,AT4G02520,AT1G12200,AT1G72290,AT3G12500,AT2G43620,AT3G25882,AT3G57260,AT2G43570,AT5G21100,AT2G43590,AT1G12010,AT4G23260,AT4G12480,AT2G18660,AT1G53990,AT5G40780,AT1G79680,AT2G14580,AT1G19670,AT2G31230,AT1G75030,AT1G21250,AT2G21660,AT4G16260,AT5G13320,AT1G52030,AT1G73260,AT5G61420,AT5G22570,AT5G06740,AT3G14395…
GO:BP	response to insect	GO:0009625	0.000002900551982236424	5.53751934691897	32	279	8	23416	AT1G74080,AT1G72290,AT1G73260,AT1G16410,AT5G61420,AT4G16740,AT4G13770,AT5G23010
GO:BP	response to herbivore	GO:0080027	0.000003475808064102013	5.458944213524531	15	227	6	23416	AT3G04720,AT1G72290,AT3G45140,AT2G14580,AT4G16740,AT3G14395
GO:BP	sulfur compound metabolic process	GO:0006790	0.000010435516087892029	4.981486068056953	430	491	30	23416	AT3G60120,AT2G43000,AT4G02520,AT1G67810,AT1G74590,AT1G69930,AT2G29470,AT3G19710,AT4G12030,AT1G21120,AT1G16410,AT5G61420,AT2G02930,AT4G13770,AT5G14200,AT5G23010,AT2G30860,AT1G74090,AT5G13330,AT1G18590,AT1G17180,AT1G21100,AT3G11580,AT5G36220,AT2G30840,AT1G74100,AT5G59540,AT2G29460,AT3G23810,AT4G31500
GO:BP	defense response to bacterium	GO:0042742	0.000012956799671940442	4.887502255907795	448	532	32	23416	AT2G47130,AT3G04720,AT4G19700,AT2G40750,AT2G13810,AT2G45220,AT4G02520,AT4G23260,AT4G12480,AT1G53990,AT1G19670,AT5G13320,AT1G73260,AT5G61420,AT5G22570,AT5G06740,AT4G23270,AT4G23130,AT5G01900,AT1G19250,AT2G30860,AT3G45330,AT1G20160,AT4G23280,AT3G10525,AT5G48380,AT4G39090,AT1G14370,AT4G31500,AT1G11350,AT5G64810,AT1G02450
GO:BP	response to organic cyclic compound	GO:0014070	0.0000231824606779634	4.634840468193674	391	265	20	23416	AT3G48360,AT2G40750,AT2G13810,AT4G39070,AT2G43570,AT1G79680,AT2G14580,AT1G21250,AT5G13320,AT1G15780,AT1G73260,AT5G61420,AT5G22570,AT3G14395,AT4G23270,AT5G59780,AT1G15520,AT4G23130,AT5G01900,AT3G61460
GO:BP	glycosyl compound biosynthetic process	GO:1901659	0.000030997172839490524	4.508677915075403	87	491	13	23416	AT3G19710,AT4G12030,AT1G16410,AT5G61420,AT4G13770,AT5G14200,AT5G23010,AT1G74090,AT1G18590,AT2G30840,AT1G74100,AT5G59540,AT4G31500
GO:BP	secondary metabolite biosynthetic process	GO:0044550	0.00003423191693136506	4.4655687804004245	176	491	18	23416	AT2G43000,AT5G54160,AT3G19710,AT4G12030,AT4G19370,AT1G16410,AT5G61420,AT4G13770,AT1G32100,AT5G14200,AT5G23010,AT1G74090,AT4G37990,AT1G18590,AT2G30840,AT1G74100,AT5G59540,AT4G31500
GO:BP	defense response to other organism	GO:0098542	0.00004463790393449047	4.3502962067912865	1178	274	37	23416	AT2G47130,AT3G04720,AT4G19700,AT4G39830,AT2G40750,AT5G55450,AT2G13810,AT2G45220,AT4G02520,AT1G12200,AT3G12500,AT3G25882,AT3G57260,AT2G43570,AT5G21100,AT4G23260,AT4G12480,AT2G18660,AT1G53990,AT2G14580,AT1G19670,AT1G21250,AT2G21660,AT4G16260,AT5G13320,AT1G73260,AT5G61420,AT5G22570,AT5G06740,AT3G14395,AT4G23270,AT1G15520,AT4G23130,AT2G39200,AT5G01900,AT5G64750,AT1G19250
GO:BP	regulation of circadian rhythm	GO:0042752	0.000048132521866489576	4.317561383200927	57	41	5	23416	AT3G20810,AT2G40080,AT5G42900,AT3G46640,AT4G33980
GO:BP	systemic acquired resistance	GO:0009627	0.00014659702110315201	3.833874854603537	80	117	7	23416	AT3G04720,AT5G55450,AT2G13810,AT3G25882,AT3G57260,AT2G43570,AT2G18660
GO:BP	glycosyl compound metabolic process	GO:1901657	0.00024018656540508604	3.619451288080532	244	491	20	23416	AT3G60120,AT3G19710,AT4G12030,AT1G21120,AT1G16410,AT5G61420,AT4G13770,AT5G14200,AT5G23010,AT1G74090,AT5G13330,AT1G18590,AT1G21100,AT3G11580,AT5G36220,AT2G30840,AT1G74100,AT5G59540,AT3G23810,AT4G31500
GO:BP	aminoglycan catabolic process	GO:0006026	0.000246872724749037	3.6075268895955066	24	138	5	23416	AT3G12500,AT2G43620,AT2G43570,AT2G43590,AT4G19810
GO:BP	glucosamine-containing compound catabolic process	GO:1901072	0.000246872724749037	3.6075268895955066	24	138	5	23416	AT3G12500,AT2G43620,AT2G43570,AT2G43590,AT4G19810
GO:BP	chitin catabolic process	GO:0006032	0.000246872724749037	3.6075268895955066	24	138	5	23416	AT3G12500,AT2G43620,AT2G43570,AT2G43590,AT4G19810
GO:BP	amino sugar catabolic process	GO:0046348	0.000246872724749037	3.6075268895955066	24	138	5	23416	AT3G12500,AT2G43620,AT2G43570,AT2G43590,AT4G19810
GO:BP	chitin metabolic process	GO:0006030	0.000246872724749037	3.6075268895955066	24	138	5	23416	AT3G12500,AT2G43620,AT2G43570,AT2G43590,AT4G19810
GO:BP	aminoglycan metabolic process	GO:0006022	0.0008045216311046469	3.0944622745691865	30	138	5	23416	AT3G12500,AT2G43620,AT2G43570,AT2G43590,AT4G19810
GO:BP	glucosamine-containing compound metabolic process	GO:1901071	0.0011261625320660418	2.9483989259273966	32	138	5	23416	AT3G12500,AT2G43620,AT2G43570,AT2G43590,AT4G19810
GO:BP	defense response, incompatible interaction	GO:0009814	0.0021666577400339766	2.664209687366948	197	358	14	23416	AT3G04720,AT5G55450,AT2G13810,AT3G25882,AT3G57260,AT2G43570,AT2G18660,AT2G14580,AT4G16260,AT5G13320,AT2G39200,AT1G19250,AT4G37150,AT3G50470
GO:BP	toxin metabolic process	GO:0009404	0.0023474560386187496	2.6294025321242858	59	468	9	23416	AT2G43000,AT4G02520,AT1G74590,AT1G69930,AT2G29470,AT2G02930,AT2G30860,AT1G17180,AT2G29460
GO:BP	innate immune response	GO:0045087	0.002379668757999263	2.6234834910883658	386	211	15	23416	AT2G47130,AT3G04720,AT5G55450,AT2G13810,AT3G12500,AT3G25882,AT3G57260,AT2G43570,AT4G12480,AT2G18660,AT2G14580,AT2G21660,AT4G16260,AT5G13320,AT5G61420
GO:BP	response to wounding	GO:0009611	0.0023989667534497537	2.6199757707455356	204	508	17	23416	AT3G48360,AT1G72290,AT3G45140,AT2G14580,AT2G02990,AT3G19710,AT4G12030,AT1G52030,AT1G73260,AT4G16740,AT4G23600,AT5G14200,AT3G16470,AT5G50200,AT1G74100,AT4G08500,AT2G24850
GO:BP	response to karrikin	GO:0080167	0.0026912970502531632	2.5700383646048874	133	264	10	23416	AT2G40080,AT5G42900,AT4G33980,AT4G39070,AT5G18470,AT2G16660,AT5G40780,AT2G30490,AT3G02910,AT5G05600
GO:BP	immune system process	GO:0002376	0.0027259907567154084	2.5644756211038024	442	211	16	23416	AT2G47130,AT3G04720,AT5G55450,AT2G13810,AT3G12500,AT3G25882,AT3G57260,AT2G43570,AT5G21100,AT4G12480,AT2G18660,AT2G14580,AT2G21660,AT4G16260,AT5G13320,AT5G61420
GO:BP	toxin catabolic process	GO:0009407	0.0030901226138400286	2.5100242877409764	46	468	8	23416	AT4G02520,AT1G74590,AT1G69930,AT2G29470,AT2G02930,AT2G30860,AT1G17180,AT2G29460
GO:BP	immune response	GO:0006955	0.003671711275653005	2.4351314767955845	400	211	15	23416	AT2G47130,AT3G04720,AT5G55450,AT2G13810,AT3G12500,AT3G25882,AT3G57260,AT2G43570,AT4G12480,AT2G18660,AT2G14580,AT2G21660,AT4G16260,AT5G13320,AT5G61420
GO:BP	response to lipid	GO:0033993	0.004664132101471275	2.3312291576213484	881	405	35	23416	AT5G42900,AT3G48360,AT4G19700,AT4G33980,AT2G40750,AT5G46590,AT4G39070,AT2G38940,AT1G12010,AT4G12480,AT4G19810,AT4G04490,AT5G56860,AT5G61420,AT1G69530,AT2G41940,AT5G59780,AT1G15520,AT4G36410,AT4G23600,AT3G61460,AT5G64750,AT2G19590,AT2G34340,AT5G06650,AT3G58070,AT5G13330,AT4G26150,AT2G44080,AT2G43140,AT5G13170,AT2G45900,AT3G53180,AT5G58670,AT5G53160
GO:BP	oxoacid metabolic process	GO:0043436	0.006214618175361365	2.2065855491506734	1290	508	53	23416	AT3G03480,AT3G60120,AT2G13810,AT2G43000,AT5G21100,AT5G20960,AT3G45140,AT5G02890,AT5G07010,AT3G19710,AT4G12030,AT4G21680,AT1G12110,AT5G13320,AT3G25770,AT1G21120,AT1G08090,AT1G15780,AT1G16410,AT5G61420,AT1G23160,AT4G23600,AT4G13770,AT5G14200,AT1G19250,AT5G23010,AT3G07270,AT2G47140,AT1G74090,AT5G13330,AT1G68570,AT4G37150,AT2G27820,AT1G18590,AT1G21100,AT3G53180,AT2G02010,AT3G11580,AT5G36220,AT2G30840…
GO:BP	organic acid metabolic process	GO:0006082	0.007558346080305382	2.1215732265595313	1299	508	53	23416	AT3G03480,AT3G60120,AT2G13810,AT2G43000,AT5G21100,AT5G20960,AT3G45140,AT5G02890,AT5G07010,AT3G19710,AT4G12030,AT4G21680,AT1G12110,AT5G13320,AT3G25770,AT1G21120,AT1G08090,AT1G15780,AT1G16410,AT5G61420,AT1G23160,AT4G23600,AT4G13770,AT5G14200,AT1G19250,AT5G23010,AT3G07270,AT2G47140,AT1G74090,AT5G13330,AT1G68570,AT4G37150,AT2G27820,AT1G18590,AT1G21100,AT3G53180,AT2G02010,AT3G11580,AT5G36220,AT2G30840…
GO:BP	amino sugar metabolic process	GO:0006040	0.008878007442086912	2.0516844952583964	48	138	5	23416	AT3G12500,AT2G43620,AT2G43570,AT2G43590,AT4G19810
GO:BP	response to nitrate	GO:0010167	0.01030354827590206	1.9870131897342114	28	436	6	23416	AT3G48360,AT4G21680,AT1G12110,AT1G08090,AT4G26150,AT5G50200
GO:BP	oxidation-reduction process	GO:0055114	0.011115550018850805	1.954069042704813	1860	308	47	23416	AT3G20810,AT5G19880,AT3G14690,AT5G24150,AT2G47130,AT1G19320,AT2G30750,AT4G39830,AT1G06640,AT4G02520,AT3G14620,AT1G12200,AT5G20630,AT2G38240,AT5G21100,AT1G12010,AT3G21420,AT5G20960,AT3G45140,AT2G30670,AT2G18660,AT1G26420,AT2G45510,AT1G68750,AT2G43020,AT2G30490,AT2G37700,AT3G30180,AT1G16410,AT3G56060,AT5G06730,AT3G56630,AT4G13770,AT5G05600,AT1G32100,AT5G14200,AT2G45570,AT1G19250,AT4G15680,AT2G19590…
GO:BP	response to gibberellin	GO:0009739	0.013449288335344759	1.8713006956028233	161	516	14	23416	AT4G19700,AT5G56860,AT5G61420,AT1G69530,AT2G41940,AT5G59780,AT4G36410,AT2G34340,AT5G06650,AT3G58070,AT4G26150,AT2G45900,AT5G15310,AT2G36890
GO:BP	glutathione metabolic process	GO:0006749	0.016147489357641768	1.7918949930160546	57	468	8	23416	AT4G02520,AT1G74590,AT1G69930,AT2G29470,AT2G02930,AT2G30860,AT1G17180,AT2G29460
GO:BP	vegetative to reproductive phase transition of meristem	GO:0010228	0.016393030394387418	1.785340755892088	228	369	14	23416	AT2G40080,AT5G42900,AT3G07650,AT4G33980,AT2G42940,AT5G56860,AT1G29860,AT1G79000,AT2G21660,AT1G12110,AT2G42280,AT4G26150,AT1G21920,AT3G16470
GO:BP	photoperiodism, flowering	GO:0048573	0.022608775745678194	1.6457229538550577	126	356	10	23416	AT2G40080,AT5G42900,AT3G07650,AT4G33980,AT5G56860,AT1G79000,AT1G12110,AT2G42280,AT4G26150,AT1G21920
GO:BP	cell wall macromolecule catabolic process	GO:0016998	0.024450058593144208	1.6117200957776323	40	100	4	23416	AT3G12500,AT2G43620,AT2G43570,AT2G43590
GO:BP	cellular modified amino acid metabolic process	GO:0006575	0.02468951929740826	1.6074873656579967	113	490	11	23416	AT4G02520,AT1G74590,AT1G69930,AT2G29470,AT2G02930,AT3G07270,AT2G30860,AT1G17180,AT2G29460,AT3G23810,AT5G57850
GO:BP	response to toxic substance	GO:0009636	0.02777843395564967	1.5562922418090166	284	484	18	23416	AT5G19880,AT4G02520,AT1G74590,AT1G69930,AT2G29470,AT1G12110,AT2G02930,AT4G15550,AT5G06730,AT4G23600,AT5G05600,AT2G30860,AT4G25090,AT1G17180,AT5G51060,AT3G50740,AT2G29460,AT1G20620
GO:BP	carbohydrate derivative catabolic process	GO:1901136	0.030582670658263613	1.5145245921250423	102	138	6	23416	AT3G60120,AT3G12500,AT2G43620,AT2G43570,AT2G43590,AT4G19810
GO:BP	sulfur compound biosynthetic process	GO:0044272	0.03274551298672295	1.4848482015839968	183	491	14	23416	AT2G43000,AT3G19710,AT4G12030,AT1G16410,AT5G61420,AT4G13770,AT5G14200,AT5G23010,AT1G74090,AT1G18590,AT2G30840,AT1G74100,AT5G59540,AT4G31500
GO:BP	photoperiodism	GO:0009648	0.04363465024832761	1.3601685007521491	136	356	10	23416	AT2G40080,AT5G42900,AT3G07650,AT4G33980,AT5G56860,AT1G79000,AT1G12110,AT2G42280,AT4G26150,AT1G21920
GO:CC	secretory vesicle	GO:0099503	3.325540764360349e-8	7.478137724230898	173	209	15	21213	AT3G04720,AT5G20630,AT3G12500,AT2G43620,AT3G57240,AT3G57260,AT2G43570,AT2G43590,AT4G12480,AT2G38540,AT4G19810,AT5G67360,AT3G52840,AT4G16260,AT1G73260
GO:CC	cell wall	GO:0005618	0.0005692963146707944	3.244661627576681	807	233	25	21213	AT1G29670,AT2G45220,AT5G20630,AT1G72290,AT5G18470,AT3G57240,AT3G57260,AT2G43570,AT5G21100,AT4G12480,AT2G18660,AT1G26420,AT2G38540,AT2G02990,AT4G19810,AT5G67360,AT1G21250,AT3G52840,AT2G43050,AT4G16260,AT2G30490,AT1G10550,AT5G06870,AT1G69530,AT1G71380
GO:CC	external encapsulating structure	GO:0030312	0.000594585027025043	3.2257860314954887	809	233	25	21213	AT1G29670,AT2G45220,AT5G20630,AT1G72290,AT5G18470,AT3G57240,AT3G57260,AT2G43570,AT5G21100,AT4G12480,AT2G18660,AT1G26420,AT2G38540,AT2G02990,AT4G19810,AT5G67360,AT1G21250,AT3G52840,AT2G43050,AT4G16260,AT2G30490,AT1G10550,AT5G06870,AT1G69530,AT1G71380
GO:CC	plant-type cell wall	GO:0009505	0.010681385134646892	1.9713724254602703	328	261	14	21213	AT5G20630,AT5G18470,AT2G43570,AT5G21100,AT4G12480,AT2G38540,AT5G67360,AT1G21250,AT3G52840,AT2G30490,AT5G06870,AT1G69530,AT1G71380,AT2G45470
GO:CC	apoplast	GO:0048046	0.01511013892470554	1.8207315426791313	520	261	18	21213	AT1G29670,AT4G02520,AT5G20630,AT1G72290,AT2G43620,AT3G57240,AT3G57260,AT2G43570,AT2G18660,AT2G38540,AT5G67360,AT3G52840,AT2G21660,AT1G10550,AT3G20270,AT5G09440,AT4G23600,AT2G45470
KEGG	Glucosinolate biosynthesis	KEGG:00966	0.013678373223833242	1.8639655504172954	25	491	9	4976	AT3G19710,AT1G16410,AT4G13770,AT5G14200,AT5G23010,AT1G74090,AT1G18590,AT1G74100,AT4G31500
