# Supplementary material for: BrPP5.2 Overexpression Confers Heat Shock Tolerance in Transgenic Brassica rapa through Inherent Chaperone Activity, Induced Glucosinolate Biosynthesis, and Differential Regulation of Abiotic Stress Response Genes
Source: Int J Mol Sci. 2021 Jun 16;22(12):6437. doi: 10.3390/ijms22126437 (PMC8234546; doi:10.3390/ijms22126437)
Supplement: Supplementary file 1 [file ijms-22-06437-s001.zip › unique DEGs.xlsx]

## Sheet: Sheet1
TAIR_ID
-
-
-
-
-
-
-
AT1G02790
AT1G02790
AT1G02790
AT1G03920
AT1G04470
AT1G04470
AT1G04500
AT1G06640
AT1G07280
AT1G08090
AT1G14420
AT1G16510
AT1G16950
AT1G16950
AT1G19640
AT1G26580
AT1G46984
AT1G65800
AT1G74090
AT1G76680
AT2G15080
AT2G33100
AT2G36210
AT2G36770
AT2G36780
AT2G39370
AT2G43940
AT2G47040
AT2G47040
AT2G47040
AT3G01030
AT3G03480
AT3G07820
AT3G13400
AT3G14690
AT3G15280
AT3G18100
AT3G19660
AT3G28750
AT3G49540
AT3G55150
AT3G56700
AT3G57710
AT3G57780
AT3G62120
AT3G62170
AT3G62960
AT4G03740
AT4G12300
AT4G15350
AT4G16190
AT4G19690
AT4G20095
AT4G24500
AT4G30140
AT4G33710
AT4G34131
AT5G03310
AT5G19880
AT5G22430
AT5G25180
AT5G46220
AT5G49180
AT5G49690
AT5G55880
AT5G57820
AT5G57830
AT5G61820
AT5G63820

## Sheet: chart
Category	Term	Count	%	PValue	Genes	List Total	Pop Hits	Pop Total	Fold Enrichment	Bonferroni	Benjamini	FDR
INTERPRO	IPR012334:Pectin lyase fold	6	9.52381	2.61004e-05	AT1G14420, AT5G49180, AT2G47040, AT1G02790, AT3G62170, AT3G07820	51	155	22105	16.778	0.00268477	0.00134417	0.00129197
INTERPRO	IPR011050:Pectin lyase fold/virulence factor	6	9.52381	2.61004e-05	AT1G14420, AT5G49180, AT2G47040, AT1G02790, AT3G62170, AT3G07820	51	155	22105	16.778	0.00268477	0.00134417	0.00129197
GOTERM_CC_DIRECT	GO:0090406~pollen tube	4	6.34921	0.000239616	AT5G46220, AT2G47040, AT3G62170, AT4G30140	56	55	25147	32.6584	0.00740147	0.0074281	0.00718849
INTERPRO	IPR018040:Pectinesterase, active site	3	4.7619	0.000749618	AT5G49180, AT2G47040, AT3G62170	51	18	22105	72.2386	0.0743319	0.0257369	0.0247374
UP_KEYWORDS	Signal	19	30.1587	0.00123201	AT5G19880, AT1G14420, AT5G22430, AT4G19690, AT4G33710, AT3G28750, AT4G16190, AT1G16950, AT3G07820, AT2G15080, AT5G49180, AT5G61820, AT3G13400, AT2G47040, AT1G02790, AT3G62170, AT1G65800, AT4G15350, AT4G30140	62	3697	26542	2.20012	0.0883121	0.0924006	0.0874725
GOTERM_BP_DIRECT	GO:0045490~pectin catabolic process	4	6.34921	0.00128937	AT1G14420, AT5G49180, AT2G47040, AT3G62170	42	97	18499	18.163	0.123309	0.0993417	0.0983677
GOTERM_MF_DIRECT	GO:0080044~quercetin 7-O-glucosyltransferase activity	4	6.34921	0.00158578	AT2G36780, AT4G34131, AT5G49690, AT2G36770	41	105	18171	16.8836	0.128964	0.0728169	0.0728169
GOTERM_MF_DIRECT	GO:0080043~quercetin 3-O-glucosyltransferase activity	4	6.34921	0.00167395	AT2G36780, AT4G34131, AT5G49690, AT2G36770	41	107	18171	16.568	0.135631	0.0728169	0.0728169
GOTERM_BP_DIRECT	GO:0052696~flavonoid glucuronidation	4	6.34921	0.00194788	AT2G36780, AT4G34131, AT5G49690, AT2G36770	42	112	18499	15.7304	0.180349	0.0993417	0.0983677
INTERPRO	IPR002213:UDP-glucuronosyl/UDP-glucosyltransferase	4	6.34921	0.00230616	AT2G36780, AT4G34131, AT5G49690, AT2G36770	51	116	22105	14.9459	0.211647	0.0593837	0.0570776
UP_KEYWORDS	Cell wall biogenesis/degradation	6	9.52381	0.002592	AT2G33100, AT5G49180, AT2G47040, AT1G02790, AT3G62170, AT3G07820	62	413	26542	6.21932	0.176879	0.0971999	0.0920159
KEGG_PATHWAY	ath00592:alpha-Linolenic acid metabolism	3	4.7619	0.00297093	AT3G03480, AT1G19640, AT1G76680	12	36	4727	32.8264	0.0293152	0.0297093	0.0297093
GOTERM_BP_DIRECT	GO:0009813~flavonoid biosynthetic process	4	6.34921	0.0040436	AT2G36780, AT4G34131, AT5G49690, AT2G36770	42	145	18499	12.1504	0.338525	0.137482	0.136134
UP_SEQ_FEATURE	site:Transition state stabilizer	4	6.34921	0.00457539	AT5G19880, AT5G49180, AT2G47040, AT3G62170	20	162	8938	11.0346	0.250921	0.28333	0.28333
GOTERM_MF_DIRECT	GO:0016758~transferase activity, transferring hexosyl groups	4	6.34921	0.00558314	AT2G36780, AT4G34131, AT5G49690, AT2G36770	41	164	18171	10.8096	0.385591	0.161911	0.161911
GOTERM_CC_DIRECT	GO:0043231~intracellular membrane-bounded organelle	4	6.34921	0.00787861	AT2G36780, AT4G34131, AT5G49690, AT2G36770	56	186	25147	9.65707	0.217455	0.09272	0.0897291
UP_SEQ_FEATURE	signal peptide	9	14.2857	0.00885405	AT5G19880, AT1G14420, AT5G49180, AT4G19690, AT4G33710, AT2G47040, AT1G02790, AT3G62170, AT4G30140	20	1520	8938	2.64612	0.428956	0.28333	0.28333
INTERPRO	IPR000070:Pectinesterase, catalytic	3	4.7619	0.00952381	AT5G49180, AT2G47040, AT3G62170	51	65	22105	20.0045	0.626805	0.196191	0.188571
GOTERM_MF_DIRECT	GO:0045330~aspartyl esterase activity	3	4.7619	0.00954469	AT5G49180, AT2G47040, AT3G62170	41	67	18171	19.8446	0.565855	0.174457	0.174457
UP_KEYWORDS	Aspartyl esterase	3	4.7619	0.00984723	AT5G49180, AT2G47040, AT3G62170	62	65	26542	19.7583	0.523936	0.246181	0.233051
GOTERM_MF_DIRECT	GO:0020037~heme binding	5	7.93651	0.0100263	AT3G14690, AT5G19880, AT4G12300, AT4G15350, AT5G25180	41	386	18171	5.74087	0.583841	0.174457	0.174457
GOTERM_CC_DIRECT	GO:0071944~cell periphery	3	4.7619	0.0111761	AT5G49180, AT2G47040, AT3G62170	56	73	25147	18.4543	0.294191	0.09272	0.0897291
GOTERM_BP_DIRECT	GO:0042545~cell wall modification	3	4.7619	0.0117038	AT5G49180, AT2G47040, AT3G62170	42	74	18499	17.8562	0.699054	0.298446	0.29552
GOTERM_CC_DIRECT	GO:0005576~extracellular region	13	20.6349	0.0119639	AT5G19880, AT1G14420, AT4G33710, AT4G16190, AT3G07820, AT5G49690, AT2G15080, AT5G49180, AT3G13400, AT2G47040, AT1G02790, AT3G62170, AT4G30140	56	2686	25147	2.17338	0.311415	0.09272	0.0897291
INTERPRO	IPR003676:Auxin responsive SAUR protein	3	4.7619	0.0122086	AT5G03310, AT2G36210, AT1G16510	51	74	22105	17.5715	0.717824	0.209581	0.201442
KEGG_PATHWAY	ath00040:Pentose and glucuronate interconversions	3	4.7619	0.012774	AT1G14420, AT5G49180, AT1G02790	12	76	4727	15.5493	0.120642	0.06387	0.06387
GOTERM_MF_DIRECT	GO:0019825~oxygen binding	4	6.34921	0.0146723	AT3G14690, AT4G12300, AT4G15350, AT5G25180	41	234	18171	7.57598	0.723611	0.186838	0.186838
COG_ONTOLOGY	Carbohydrate transport and metabolism / Signal transduction mechanisms	3	4.7619	0.0148486	AT2G36780, AT4G34131, AT5G49690	9	63	2589	13.6984	0.0438877	0.0296972	0.0296972
GOTERM_MF_DIRECT	GO:0030599~pectinesterase activity	3	4.7619	0.0150329	AT5G49180, AT2G47040, AT3G62170	41	85	18171	15.6422	0.732275	0.186838	0.186838
UP_SEQ_FEATURE	glycosylation site:N-linked (GlcNAc...)	7	11.1111	0.0151539	AT5G19880, AT1G14420, AT5G49180, AT2G47040, AT1G02790, AT3G62170, AT4G30140	20	1009	8938	3.1004	0.617874	0.323284	0.323284
INTERPRO	IPR002401:Cytochrome P450, E-class, group I	4	6.34921	0.0152163	AT3G14690, AT4G12300, AT4G15350, AT5G25180	51	230	22105	7.53794	0.793887	0.223898	0.215203
SMART	SM00856:SM00856	3	4.7619	0.0163784	AT5G49180, AT2G47040, AT3G62170	15	120	8423	14.0383	0.219414	0.245676	0.245676
INTERPRO	IPR001128:Cytochrome P450	4	6.34921	0.0187598	AT3G14690, AT4G12300, AT4G15350, AT5G25180	51	249	22105	6.96275	0.857813	0.241532	0.232153
UP_KEYWORDS	Cell wall	4	6.34921	0.0194874	AT5G49180, AT2G47040, AT1G02790, AT3G62170	62	248	26542	6.90479	0.771446	0.365388	0.345901
GOTERM_MF_DIRECT	GO:0008194~UDP-glycosyltransferase activity	3	4.7619	0.0208013	AT2G36780, AT4G34131, AT2G36770	41	101	18171	13.1642	0.839394	0.219412	0.219412
GOTERM_MF_DIRECT	GO:0016757~transferase activity, transferring glycosyl groups	5	7.93651	0.0235415	AT2G33100, AT5G46220, AT2G36780, AT5G49690, AT2G36770	41	499	18171	4.44083	0.874142	0.219412	0.219412
GOTERM_MF_DIRECT	GO:0046910~pectinesterase inhibitor activity	3	4.7619	0.0252197	AT5G49180, AT2G47040, AT3G62170	41	112	18171	11.8713	0.891636	0.219412	0.219412
GOTERM_BP_DIRECT	GO:0055114~oxidation-reduction process	8	12.6984	0.0255033	AT3G14690, AT5G19880, AT4G12300, AT3G13400, AT3G62960, AT1G76680, AT4G15350, AT5G25180	42	1330	18499	2.64934	0.928287	0.498761	0.493871
UP_KEYWORDS	Glycosyltransferase	5	7.93651	0.0267251	AT2G33100, AT2G36780, AT4G34131, AT5G49690, AT2G36770	62	493	26542	4.34175	0.868882	0.386268	0.365667
GOTERM_BP_DIRECT	GO:0008152~metabolic process	4	6.34921	0.0293389	AT2G36780, AT4G34131, AT5G49690, AT2G36770	42	303	18499	5.81455	0.952038	0.498761	0.493871
UP_KEYWORDS	Iron	6	9.52381	0.0309014	AT3G14690, AT5G19880, AT4G19690, AT4G12300, AT1G06640, AT5G25180	62	764	26542	3.36202	0.905028	0.386268	0.365667
INTERPRO	IPR006501:Pectinesterase inhibitor	3	4.7619	0.0316222	AT5G49180, AT2G47040, AT3G62170	51	123	22105	10.5715	0.963473	0.361899	0.347845
GOTERM_MF_DIRECT	GO:0005506~iron ion binding	4	6.34921	0.0374205	AT3G14690, AT4G12300, AT4G15350, AT5G25180	41	336	18171	5.27613	0.963777	0.295962	0.295962
GOTERM_CC_DIRECT	GO:0009505~plant-type cell wall	4	6.34921	0.0386389	AT5G49180, AT3G13400, AT2G47040, AT3G62170	56	341	25147	5.26749	0.70523	0.239561	0.231833
GOTERM_BP_DIRECT	GO:0044550~secondary metabolite biosynthetic process	3	4.7619	0.0409995	AT4G12300, AT4G15350, AT5G25180	42	145	18499	9.11281	0.986019	0.597421	0.591564
GOTERM_MF_DIRECT	GO:0016709~oxidoreductase activity, acting on paired donors, with incorporation or reduction of molecular oxygen, NAD(P)H as one donor, and incorporation of one atom of oxygen	3	4.7619	0.042523	AT4G12300, AT4G15350, AT5G25180	41	149	18171	8.92339	0.977188	0.308292	0.308292
UP_KEYWORDS	Oxylipin biosynthesis	2	3.1746	0.0427893	AT1G19640, AT1G76680	62	19	26542	45.0628	0.962367	0.414957	0.392826
UP_KEYWORDS	Glycoprotein	9	14.2857	0.0442621	AT5G19880, AT1G14420, AT5G49180, AT4G16190, AT2G47040, AT1G02790, AT3G62170, AT1G65800, AT4G30140	62	1735	26542	2.22067	0.966472	0.414957	0.392826
COG_ONTOLOGY	Secondary metabolites biosynthesis, transport, and catabolism	4	6.34921	0.0446929	AT3G14690, AT4G12300, AT4G15350, AT5G25180	9	276	2589	4.16908	0.128176	0.0446929	0.0446929
INTERPRO	IPR006462:Protein of unknown function DUF626, Arabidopsis thaliana	2	3.1746	0.0486208	AT5G63820, AT4G20095	51	22	22105	39.4029	0.994106	0.500794	0.481346
GOTERM_BP_DIRECT	GO:0031408~oxylipin biosynthetic process	2	3.1746	0.0518895	AT1G19640, AT1G76680	42	24	18499	36.7044	0.995639	0.611927	0.605928
GOTERM_BP_DIRECT	GO:0009695~jasmonic acid biosynthetic process	2	3.1746	0.0539936	AT1G19640, AT1G76680	42	25	18499	35.2362	0.996523	0.611927	0.605928
UP_KEYWORDS	Oxidoreductase	7	11.1111	0.057849	AT3G14690, AT5G19880, AT3G56700, AT4G12300, AT1G06640, AT1G76680, AT5G25180	62	1205	26542	2.48687	0.988544	0.455229	0.43095
UP_KEYWORDS	Heme	4	6.34921	0.0606971	AT3G14690, AT5G19880, AT4G12300, AT5G25180	62	390	26542	4.39074	0.990871	0.455229	0.43095
UP_KEYWORDS	Secreted	7	11.1111	0.0704217	AT5G19880, AT5G49180, AT2G47040, AT1G02790, AT3G62170, AT4G30140, AT3G07820	62	1268	26542	2.36331	0.995817	0.480148	0.45454
GOTERM_BP_DIRECT	GO:0009611~response to wounding	3	4.7619	0.0718412	AT3G56700, AT1G19640, AT1G76680	42	199	18499	6.63999	0.999502	0.73278	0.725596
UP_SEQ_FEATURE	active site:Proton donor	3	4.7619	0.0777884	AT2G47040, AT1G76680, AT1G02790	20	219	8938	6.12192	0.993914	0.74761	0.74761
UP_SEQ_FEATURE	binding site:Substrate; for pectinesterase activity	2	3.1746	0.0817698	AT5G49180, AT3G62170	20	40	8938	22.345	0.995366	0.74761	0.74761
UP_SEQ_FEATURE	active site:Proton donor; for pectinesterase activity	2	3.1746	0.0817698	AT5G49180, AT3G62170	20	40	8938	22.345	0.995366	0.74761	0.74761
UP_SEQ_FEATURE	active site:Nucleophile; for pectinesterase activity	2	3.1746	0.0817698	AT5G49180, AT3G62170	20	40	8938	22.345	0.995366	0.74761	0.74761
SMART	SM00710:PbH1	2	3.1746	0.0892271	AT1G02790, AT3G07820	15	56	8423	20.0548	0.753877	0.669203	0.669203
UP_KEYWORDS	Lipid biosynthesis	3	4.7619	0.0946221	AT3G56700, AT1G19640, AT1G76680	62	225	26542	5.70796	0.999422	0.537223	0.508571
UP_KEYWORDS	Lipid metabolism	4	6.34921	0.0965025	AT3G56700, AT1G19640, AT1G76680, AT4G30140	62	476	26542	3.59745	0.999505	0.537223	0.508571

## Sheet: table
ID	Gene Name	Species	COG_ONTOLOGY	GOTERM_BP_DIRECT	GOTERM_CC_DIRECT	GOTERM_MF_DIRECT	INTERPRO	KEGG_PATHWAY	PIR_SUPERFAMILY	SMART	UP_KEYWORDS	UP_SEQ_FEATURE
AT1G76680	12-oxophytodienoate reductase 1(OPR1)	Arabidopsis thaliana		GO:0006629~lipid metabolic process,GO:0006633~fatty acid biosynthetic process,GO:0009611~response to wounding,GO:0009695~jasmonic acid biosynthetic process,GO:0009751~response to salicylic acid,GO:0010150~leaf senescence,GO:0031407~oxylipin metabolic process,GO:0031408~oxylipin biosynthetic process,GO:0046686~response to cadmium ion,GO:0055114~oxidation-reduction process,	GO:0005737~cytoplasm,GO:0005829~cytosol,	GO:0003959~NADPH dehydrogenase activity,GO:0010181~FMN binding,GO:0016491~oxidoreductase activity,GO:0016629~12-oxophytodienoate reductase activity,	IPR001155:NADH:flavin oxidoreductase/NADH oxidase, N-terminal,IPR013785:Aldolase-type TIM barrel,	ath00592:alpha-Linolenic acid metabolism,ath01100:Metabolic pathways,ath01110:Biosynthesis of secondary metabolites,			3D-structure,Acetylation,Alternative splicing,Complete proteome,Cytoplasm,Fatty acid biosynthesis,Fatty acid metabolism,Flavoprotein,FMN,Lipid biosynthesis,Lipid metabolism,NADP,Oxidoreductase,Oxylipin biosynthesis,Reference proteome,	active site:Proton donor,binding site:FMN,chain:12-oxophytodienoate reductase 1,helix,region of interest:Substrate-binding,region of interest:Substrate-binding loop,sequence conflict,strand,turn,
AT1G06640	2-oxoglutarate (2OG) and Fe(II)-dependent oxygenase superfamily protein(AT1G06640)	Arabidopsis thaliana	General function prediction only,		GO:0005737~cytoplasm,	GO:0016491~oxidoreductase activity,GO:0016706~oxidoreductase activity, acting on paired donors, with incorporation or reduction of molecular oxygen, 2-oxoglutarate as one donor, and incorporation of one atom each of oxygen into both donors,GO:0046872~metal ion binding,GO:0051213~dioxygenase activity,	IPR005123:Oxoglutarate/iron-dependent dioxygenase,IPR026992:Non-haem dioxygenase N-terminal domain,IPR027443:Isopenicillin N synthase-like,				Alternative splicing,Complete proteome,Dioxygenase,Iron,Metal-binding,Oxidoreductase,Reference proteome,	chain:1-aminocyclopropane-1-carboxylate oxidase homolog 2,domain:Fe2OG dioxygenase,metal ion-binding site:Iron,
AT3G01030	C2H2 and C2HC zinc fingers superfamily protein(AT3G01030)	Arabidopsis thaliana				GO:0003676~nucleic acid binding,GO:0003700~transcription factor activity, sequence-specific DNA binding,GO:0008270~zinc ion binding,GO:0046872~metal ion binding,GO:0071567~UFM1 hydrolase activity,	IPR007087:Zinc finger, C2H2,IPR015880:Zinc finger, C2H2-like,			SM00355:ZnF_C2H2,	Complete proteome,Reference proteome,
AT4G33710	CAP (Cysteine-rich secretory proteins, Antigen 5, and Pathogenesis-related 1 protein) superfamily protein(AT4G33710)	Arabidopsis thaliana			GO:0005576~extracellular region,		IPR001283:Allergen V5/Tpx-1-related,IPR014044:CAP domain,IPR018244:Allergen V5/Tpx-1-related, conserved site,			SM00198:SCP,	Complete proteome,Reference proteome,Signal,	signal peptide,
AT1G04500	CCT motif family protein(AT1G04500)	Arabidopsis thaliana			GO:0005634~nucleus,		IPR010402:CCT domain,				Complete proteome,Reference proteome,
AT3G62120	Class II aaRS and biotin synthetases superfamily protein(AT3G62120)	Arabidopsis thaliana		GO:0006418~tRNA aminoacylation for protein translation,GO:0006433~prolyl-tRNA aminoacylation,	GO:0005737~cytoplasm,GO:0005829~cytosol,GO:0009506~plasmodesma,GO:0016020~membrane,	GO:0003723~RNA binding,GO:0004812~aminoacyl-tRNA ligase activity,GO:0004827~proline-tRNA ligase activity,GO:0005524~ATP binding,	IPR002314:Aminoacyl-tRNA synthetase, class II (G/ H/ P/ S), conserved domain,IPR002316:Proline-tRNA ligase, class IIa,IPR004154:Anticodon-binding,IPR004499:Proline-tRNA ligase, class IIa, archaeal-type,IPR006195:Aminoacyl-tRNA synthetase, class II,IPR016061:Proline-tRNA ligase, class II, C-terminal,IPR017449:Prolyl-tRNA synthetase, class II,	ath00970:Aminoacyl-tRNA biosynthesis,		SM00946:SM00946,	Aminoacyl-tRNA synthetase,ATP-binding,Complete proteome,Cytoplasm,Ligase,Nucleotide-binding,Protein biosynthesis,Reference proteome,
AT1G26580	ELM2 domain protein(AT1G26580)	Arabidopsis thaliana			GO:0005634~nucleus,						Complete proteome,Reference proteome,
AT1G46984	F-box family protein(AT1G46984)	Arabidopsis thaliana			GO:0005634~nucleus,		IPR001810:F-box domain, cyclin-like,IPR013187:F-box associated domain, type 3,IPR017451:F-box associated interaction domain,			SM00256:FBOX,	Complete proteome,Reference proteome,	chain:Putative F-box protein At1g46984,domain:F-box,
AT4G30140	GDSL-like Lipase/Acylhydrolase superfamily protein(CDEF1)	Arabidopsis thaliana		GO:0016042~lipid catabolic process,	GO:0005576~extracellular region,GO:0005615~extracellular space,GO:0090406~pollen tube,	GO:0016788~hydrolase activity, acting on ester bonds,GO:0050525~cutinase activity,GO:0052689~carboxylic ester hydrolase activity,	IPR001087:Lipase, GDSL,				Complete proteome,Glycoprotein,Hydrolase,Lipid degradation,Lipid metabolism,Reference proteome,Secreted,Signal,	chain:GDSL esterase/lipase At4g30140,glycosylation site:N-linked (GlcNAc...),sequence conflict,signal peptide,
AT4G16190	Papain family cysteine protease(AT4G16190)	Arabidopsis thaliana		GO:0006508~proteolysis,GO:0051603~proteolysis involved in cellular protein catabolic process,	GO:0005576~extracellular region,GO:0005615~extracellular space,GO:0005764~lysosome,GO:0005773~vacuole,	GO:0004197~cysteine-type endopeptidase activity,GO:0008234~cysteine-type peptidase activity,	IPR000169:Cysteine peptidase, cysteine active site,IPR000668:Peptidase C1A, papain C-terminal,IPR013128:Peptidase C1A, papain,IPR013201:Proteinase inhibitor I29, cathepsin propeptide,IPR025661:Cysteine peptidase, asparagine active site,			SM00645:Pept_C1,SM00848:SM00848,	Complete proteome,Disulfide bond,Glycoprotein,Hydrolase,Protease,Reference proteome,Signal,Thiol protease,Vacuole,Zymogen,
AT1G14420	Pectate lyase family protein(AT59)	Arabidopsis thaliana		GO:0009664~plant-type cell wall organization,GO:0045490~pectin catabolic process,	GO:0005576~extracellular region,	GO:0016829~lyase activity,GO:0030570~pectate lyase activity,GO:0046872~metal ion binding,	IPR002022:Pectate lyase/Amb allergen,IPR007524:Pectate lyase, N-terminal,IPR011050:Pectin lyase fold/virulence factor,IPR012334:Pectin lyase fold,IPR018082:AmbAllergen,	ath00040:Pentose and glucuronate interconversions,		SM00656:Amb_all,	Calcium,Complete proteome,Glycoprotein,Lyase,Metal-binding,Reference proteome,Signal,	chain:Probable pectate lyase 3,glycosylation site:N-linked (GlcNAc...),metal ion-binding site:Calcium,sequence conflict,signal peptide,
AT3G07820	Pectin lyase-like superfamily protein(AT3G07820)	Arabidopsis thaliana		GO:0005975~carbohydrate metabolic process,GO:0071555~cell wall organization,	GO:0005576~extracellular region,	GO:0004650~polygalacturonase activity,	IPR000743:Glycoside hydrolase, family 28,IPR006626:Parallel beta-helix repeat,IPR011050:Pectin lyase fold/virulence factor,IPR012334:Pectin lyase fold,			SM00710:PbH1,	Cell wall biogenesis/degradation,Complete proteome,Glycosidase,Hydrolase,Reference proteome,Secreted,Signal,
AT5G19880	Peroxidase superfamily protein(AT5G19880)	Arabidopsis thaliana		GO:0006979~response to oxidative stress,GO:0009615~response to virus,GO:0009723~response to ethylene,GO:0042744~hydrogen peroxide catabolic process,GO:0055114~oxidation-reduction process,	GO:0005576~extracellular region,	GO:0004601~peroxidase activity,GO:0020037~heme binding,GO:0046872~metal ion binding,	IPR000823:Plant peroxidase,IPR002016:Haem peroxidase, plant/fungal/bacterial,IPR010255:Haem peroxidase,IPR019793:Peroxidases heam-ligand binding site,IPR019794:Peroxidase, active site,	ath00940:Phenylpropanoid biosynthesis,ath01100:Metabolic pathways,ath01110:Biosynthesis of secondary metabolites,			Calcium,Complete proteome,Disulfide bond,Glycoprotein,Heme,Hydrogen peroxide,Iron,Metal-binding,Oxidoreductase,Peroxidase,Reference proteome,Secreted,Signal,	active site:Proton acceptor,binding site:Substrate; via carbonyl oxygen,chain:Peroxidase 58,disulfide bond,glycosylation site:N-linked (GlcNAc...),metal ion-binding site:Calcium 1,metal ion-binding site:Calcium 1; via carbonyl oxygen,metal ion-binding site:Calcium 2,metal ion-binding site:Iron (heme axial ligand),modified residue,sequence conflict,signal peptide,site:Transition state stabilizer,
AT5G49180	Plant invertase/pectin methylesterase inhibitor superfamily(AT5G49180)	Arabidopsis thaliana		GO:0042545~cell wall modification,GO:0045490~pectin catabolic process,GO:0048358~mucilage pectin biosynthetic process,GO:0048359~mucilage metabolic process involved in seed coat development,	GO:0005576~extracellular region,GO:0005618~cell wall,GO:0009505~plant-type cell wall,GO:0016021~integral component of membrane,GO:0071944~cell periphery,	GO:0004857~enzyme inhibitor activity,GO:0030599~pectinesterase activity,GO:0045330~aspartyl esterase activity,GO:0046910~pectinesterase inhibitor activity,	IPR000070:Pectinesterase, catalytic,IPR006501:Pectinesterase inhibitor,IPR011050:Pectin lyase fold/virulence factor,IPR012334:Pectin lyase fold,IPR018040:Pectinesterase, active site,	ath00040:Pentose and glucuronate interconversions,ath01100:Metabolic pathways,		SM00856:SM00856,	Aspartyl esterase,Cell wall,Cell wall biogenesis/degradation,Complete proteome,Disulfide bond,Glycoprotein,Hydrolase,Membrane,Reference proteome,Secreted,Signal,Transmembrane,Transmembrane helix,	active site:Nucleophile; for pectinesterase activity,active site:Proton donor; for pectinesterase activity,binding site:Substrate; for pectinesterase activity,chain:Probable pectinesterase/pectinesterase inhibitor 58,disulfide bond,glycosylation site:N-linked (GlcNAc...),region of interest:Pectinesterase 58,region of interest:Pectinesterase inhibitor 58,signal peptide,site:Transition state stabil…
AT2G47040	Plant invertase/pectin methylesterase inhibitor superfamily(VGD1)	Arabidopsis thaliana		GO:0009860~pollen tube growth,GO:0042545~cell wall modification,GO:0045490~pectin catabolic process,	GO:0000139~Golgi membrane,GO:0005576~extracellular region,GO:0005618~cell wall,GO:0005886~plasma membrane,GO:0009505~plant-type cell wall,GO:0071944~cell periphery,GO:0090406~pollen tube,	GO:0005515~protein binding,GO:0030599~pectinesterase activity,GO:0045330~aspartyl esterase activity,GO:0046910~pectinesterase inhibitor activity,	IPR000070:Pectinesterase, catalytic,IPR006501:Pectinesterase inhibitor,IPR011050:Pectin lyase fold/virulence factor,IPR012334:Pectin lyase fold,IPR018040:Pectinesterase, active site,			SM00856:SM00856,	Aspartyl esterase,Cell membrane,Cell wall,Cell wall biogenesis/degradation,Complete proteome,Glycoprotein,Golgi apparatus,Hydrolase,Membrane,Reference proteome,Secreted,Signal,	active site:Nucleophile,active site:Proton donor,binding site:Substrate,chain:Pectinesterase 5,glycosylation site:N-linked (GlcNAc...),sequence conflict,signal peptide,site:Transition state stabilizer,
AT5G22430	Pollen Ole e 1 allergen and extensin family protein(AT5G22430)	Arabidopsis thaliana			GO:0031225~anchored component of membrane,						Complete proteome,Reference proteome,Signal,
AT1G03920	Protein kinase family protein(AT1G03920)	Arabidopsis thaliana		GO:0018105~peptidyl-serine phosphorylation,GO:0035556~intracellular signal transduction,	GO:0005622~intracellular,GO:0005634~nucleus,GO:0005829~cytosol,GO:0005886~plasma membrane,	GO:0004674~protein serine/threonine kinase activity,GO:0005524~ATP binding,GO:0016301~kinase activity,	IPR000719:Protein kinase, catalytic domain,IPR000961:AGC-kinase, C-terminal,IPR008271:Serine/threonine-protein kinase, active site,IPR011009:Protein kinase-like domain,IPR011993:Pleckstrin homology-like domain,IPR017441:Protein kinase, ATP binding site,IPR017892:Protein kinase, C-terminal,			SM00133:S_TK_X,SM00220:S_TKc,	ATP-binding,Complete proteome,Kinase,Nucleotide-binding,Reference proteome,Serine/threonine-protein kinase,Transferase,
AT3G57710	Protein kinase superfamily protein(AT3G57710)	Arabidopsis thaliana		GO:0006468~protein phosphorylation,GO:0007166~cell surface receptor signaling pathway,	GO:0005634~nucleus,GO:0005886~plasma membrane,	GO:0004674~protein serine/threonine kinase activity,GO:0005524~ATP binding,GO:0016301~kinase activity,	IPR000719:Protein kinase, catalytic domain,IPR011009:Protein kinase-like domain,				Complete proteome,Kinase,Reference proteome,Transferase,
AT2G43940	S-adenosyl-L-methionine-dependent methyltransferases superfamily protein(HOL3)	Arabidopsis thaliana		GO:0032259~methylation,	GO:0005737~cytoplasm,GO:0005829~cytosol,GO:0009507~chloroplast,GO:0009941~chloroplast envelope,	GO:0008168~methyltransferase activity,GO:0008757~S-adenosylmethionine-dependent methyltransferase activity,GO:0018708~thiol S-methyltransferase activity,	IPR008854:TPMT family,				Complete proteome,Methyltransferase,Phosphoprotein,Reference proteome,S-adenosyl-L-methionine,Transferase,
AT1G16510	SAUR-like auxin-responsive protein family(AT1G16510)	Arabidopsis thaliana		GO:0009733~response to auxin,GO:0009734~auxin-activated signaling pathway,GO:0009958~positive gravitropism,GO:0016049~cell growth,GO:0040008~regulation of growth,GO:0060918~auxin transport,GO:0090057~root radial pattern formation,	GO:0005737~cytoplasm,		IPR003676:Auxin responsive SAUR protein,	ath04075:Plant hormone signal transduction,			Auxin signaling pathway,Complete proteome,Cytoplasm,Developmental protein,Growth regulation,Reference proteome,
AT2G36210	SAUR-like auxin-responsive protein family(AT2G36210)	Arabidopsis thaliana		GO:0009733~response to auxin,			IPR003676:Auxin responsive SAUR protein,	ath04075:Plant hormone signal transduction,			Complete proteome,Reference proteome,
AT5G03310	SAUR-like auxin-responsive protein family(AT5G03310)	Arabidopsis thaliana		GO:0009733~response to auxin,			IPR003676:Auxin responsive SAUR protein,				Complete proteome,Reference proteome,
AT3G13400	SKU5 similar 13(sks13)	Arabidopsis thaliana		GO:0055114~oxidation-reduction process,	GO:0005576~extracellular region,GO:0009505~plant-type cell wall,GO:0009506~plasmodesma,	GO:0005507~copper ion binding,GO:0016722~oxidoreductase activity, oxidizing metal ions,	IPR001117:Multicopper oxidase, type 1,IPR008972:Cupredoxin,IPR011706:Multicopper oxidase, type 2,IPR011707:Multicopper oxidase, type 3,				Complete proteome,Reference proteome,Signal,
AT1G07280	Tetratricopeptide repeat (TPR)-like superfamily protein(AT1G07280)	Arabidopsis thaliana					IPR011990:Tetratricopeptide-like helical,IPR013026:Tetratricopeptide repeat-containing domain,				Complete proteome,Reference proteome,
AT3G62960	Thioredoxin superfamily protein(AT3G62960)	Arabidopsis thaliana		GO:0045454~cell redox homeostasis,GO:0055114~oxidation-reduction process,	GO:0005623~cell,GO:0005737~cytoplasm,	GO:0009055~electron carrier activity,GO:0015035~protein disulfide oxidoreductase activity,	IPR002109:Glutaredoxin,IPR011905:Glutaredoxin-like, plant II,IPR012336:Thioredoxin-like fold,IPR014025:Glutaredoxin subgroup,				Complete proteome,Cytoplasm,Disulfide bond,Electron transport,Redox-active center,Reference proteome,Transport,	chain:Glutaredoxin-C14,disulfide bond,domain:Glutaredoxin,
AT2G36770	UDP-Glycosyltransferase superfamily protein(AT2G36770)	Arabidopsis thaliana		GO:0008152~metabolic process,GO:0009813~flavonoid biosynthetic process,GO:0052696~flavonoid glucuronidation,	GO:0009507~chloroplast,GO:0043231~intracellular membrane-bounded organelle,	GO:0008194~UDP-glycosyltransferase activity,GO:0016757~transferase activity, transferring glycosyl groups,GO:0016758~transferase activity, transferring hexosyl groups,GO:0080043~quercetin 3-O-glucosyltransferase activity,GO:0080044~quercetin 7-O-glucosyltransferase activity,	IPR002213:UDP-glucuronosyl/UDP-glucosyltransferase,				Complete proteome,Glycosyltransferase,Reference proteome,Transferase,
AT2G36780	UDP-Glycosyltransferase superfamily protein(AT2G36780)	Arabidopsis thaliana	Carbohydrate transport and metabolism / Signal transduction mechanisms,	GO:0008152~metabolic process,GO:0009813~flavonoid biosynthetic process,GO:0052696~flavonoid glucuronidation,	GO:0009507~chloroplast,GO:0043231~intracellular membrane-bounded organelle,	GO:0008194~UDP-glycosyltransferase activity,GO:0016757~transferase activity, transferring glycosyl groups,GO:0016758~transferase activity, transferring hexosyl groups,GO:0080043~quercetin 3-O-glucosyltransferase activity,GO:0080044~quercetin 7-O-glucosyltransferase activity,	IPR002213:UDP-glucuronosyl/UDP-glucosyltransferase,				Complete proteome,Glycosyltransferase,Reference proteome,Transferase,
AT5G49690	UDP-Glycosyltransferase superfamily protein(AT5G49690)	Arabidopsis thaliana	Carbohydrate transport and metabolism / Signal transduction mechanisms,	GO:0008152~metabolic process,GO:0009813~flavonoid biosynthetic process,GO:0052696~flavonoid glucuronidation,	GO:0005576~extracellular region,GO:0005829~cytosol,GO:0043231~intracellular membrane-bounded organelle,	GO:0016757~transferase activity, transferring glycosyl groups,GO:0016758~transferase activity, transferring hexosyl groups,GO:0080043~quercetin 3-O-glucosyltransferase activity,GO:0080044~quercetin 7-O-glucosyltransferase activity,	IPR002213:UDP-glucuronosyl/UDP-glucosyltransferase,				Complete proteome,Glycosyltransferase,Reference proteome,Transferase,
AT4G34131	UDP-glucosyl transferase 73B3(UGT73B3)	Arabidopsis thaliana	Carbohydrate transport and metabolism / Signal transduction mechanisms,	GO:0006952~defense response,GO:0008152~metabolic process,GO:0009813~flavonoid biosynthetic process,GO:0051707~response to other organism,GO:0052696~flavonoid glucuronidation,	GO:0043231~intracellular membrane-bounded organelle,	GO:0008194~UDP-glycosyltransferase activity,GO:0010294~abscisic acid glucosyltransferase activity,GO:0016758~transferase activity, transferring hexosyl groups,GO:0035251~UDP-glucosyltransferase activity,GO:0047893~flavonol 3-O-glucosyltransferase activity,GO:0080043~quercetin 3-O-glucosyltransferase activity,GO:0080044~quercetin 7-O-glucosyltransferase activity,GO:0102360~daphnetin 3-O-glucosyltr…	IPR002213:UDP-glucuronosyl/UDP-glucosyltransferase,				Complete proteome,Glycosyltransferase,Plant defense,Reference proteome,Transferase,
AT3G62170	VANGUARD-like protein(VGDH2)	Arabidopsis thaliana		GO:0042545~cell wall modification,GO:0045490~pectin catabolic process,	GO:0005576~extracellular region,GO:0005618~cell wall,GO:0009505~plant-type cell wall,GO:0071944~cell periphery,GO:0090406~pollen tube,	GO:0004857~enzyme inhibitor activity,GO:0030599~pectinesterase activity,GO:0045330~aspartyl esterase activity,GO:0046910~pectinesterase inhibitor activity,	IPR000070:Pectinesterase, catalytic,IPR006501:Pectinesterase inhibitor,IPR011050:Pectin lyase fold/virulence factor,IPR012334:Pectin lyase fold,IPR018040:Pectinesterase, active site,			SM00856:SM00856,	Aspartyl esterase,Cell wall,Cell wall biogenesis/degradation,Complete proteome,Glycoprotein,Hydrolase,Reference proteome,Secreted,Signal,	active site:Nucleophile; for pectinesterase activity,active site:Proton donor; for pectinesterase activity,binding site:Substrate; for pectinesterase activity,chain:Probable pectinesterase/pectinesterase inhibitor VGDH2,compositionally biased region:Poly-Gly,glycosylation site:N-linked (GlcNAc...),region of interest:Pectinesterase inhibitor VGDH2,region of interest:Pectinesterase VGDH2,sequence c…
AT3G03480	acetyl CoA:(Z)-3-hexen-1-ol acetyltransferase(CHAT)	Arabidopsis thaliana		GO:0010597~green leaf volatile biosynthetic process,	GO:0005737~cytoplasm,	GO:0010327~acetyl CoA:(Z)-3-hexen-1-ol acetyltransferase activity,	IPR003480:Transferase,IPR023213:Chloramphenicol acetyltransferase-like domain,	ath00592:alpha-Linolenic acid metabolism,ath01110:Biosynthesis of secondary metabolites,			Acyltransferase,Complete proteome,Reference proteome,Transferase,
AT2G33100	cellulose synthase-like D1(CSLD1)	Arabidopsis thaliana		GO:0000271~polysaccharide biosynthetic process,GO:0009832~plant-type cell wall biogenesis,GO:0009846~pollen germination,GO:0030244~cellulose biosynthetic process,GO:0071555~cell wall organization,	GO:0000139~Golgi membrane,GO:0005794~Golgi apparatus,GO:0005886~plasma membrane,GO:0016021~integral component of membrane,	GO:0000977~RNA polymerase II regulatory region sequence-specific DNA binding,GO:0016757~transferase activity, transferring glycosyl groups,GO:0016759~cellulose synthase activity,GO:0016760~cellulose synthase (UDP-forming) activity,GO:0051753~mannan synthase activity,	IPR005150:Cellulose synthase,				Cell wall biogenesis/degradation,Complete proteome,Glycosyltransferase,Golgi apparatus,Membrane,Reference proteome,Transferase,Transmembrane,Transmembrane helix,	chain:Cellulose synthase-like protein D1,sequence conflict,transmembrane region,
AT4G15350	cytochrome P450, family 705, subfamily A, polypeptide 2(CYP705A2)	Arabidopsis thaliana	Secondary metabolites biosynthesis, transport, and catabolism,	GO:0044550~secondary metabolite biosynthetic process,GO:0055114~oxidation-reduction process,	GO:0016020~membrane,	GO:0005506~iron ion binding,GO:0016709~oxidoreductase activity, acting on paired donors, with incorporation or reduction of molecular oxygen, NAD(P)H as one donor, and incorporation of one atom of oxygen,GO:0019825~oxygen binding,GO:0020037~heme binding,	IPR001128:Cytochrome P450,IPR002401:Cytochrome P450, E-class, group I,				Complete proteome,Reference proteome,Signal,
AT4G12300	cytochrome P450, family 706, subfamily A, polypeptide 4(CYP706A4)	Arabidopsis thaliana	Secondary metabolites biosynthesis, transport, and catabolism,	GO:0044550~secondary metabolite biosynthetic process,GO:0055114~oxidation-reduction process,	GO:0009507~chloroplast,GO:0016020~membrane,GO:0016021~integral component of membrane,	GO:0005506~iron ion binding,GO:0016709~oxidoreductase activity, acting on paired donors, with incorporation or reduction of molecular oxygen, NAD(P)H as one donor, and incorporation of one atom of oxygen,GO:0019825~oxygen binding,GO:0020037~heme binding,	IPR001128:Cytochrome P450,IPR002401:Cytochrome P450, E-class, group I,IPR017972:Cytochrome P450, conserved site,				Complete proteome,Heme,Iron,Membrane,Metal-binding,Monooxygenase,Oxidoreductase,Reference proteome,Transmembrane,Transmembrane helix,
AT5G25180	cytochrome P450, family 71, subfamily B, polypeptide 14(CYP71B14)	Arabidopsis thaliana	Secondary metabolites biosynthesis, transport, and catabolism,	GO:0044550~secondary metabolite biosynthetic process,GO:0055114~oxidation-reduction process,GO:0098542~defense response to other organism,	GO:0009507~chloroplast,GO:0016020~membrane,GO:0016021~integral component of membrane,	GO:0005506~iron ion binding,GO:0016709~oxidoreductase activity, acting on paired donors, with incorporation or reduction of molecular oxygen, NAD(P)H as one donor, and incorporation of one atom of oxygen,GO:0019825~oxygen binding,GO:0020037~heme binding,	IPR001128:Cytochrome P450,IPR002401:Cytochrome P450, E-class, group I,IPR017972:Cytochrome P450, conserved site,				Complete proteome,Heme,Iron,Membrane,Metal-binding,Monooxygenase,Oxidoreductase,Reference proteome,Transmembrane,Transmembrane helix,	chain:Cytochrome P450 71B14,metal ion-binding site:Iron (heme axial ligand),sequence conflict,transmembrane region,
AT3G14690	cytochrome P450, family 72, subfamily A, polypeptide 15(CYP72A15)	Arabidopsis thaliana	Secondary metabolites biosynthesis, transport, and catabolism,	GO:0055114~oxidation-reduction process,	GO:0016021~integral component of membrane,	GO:0004497~monooxygenase activity,GO:0005506~iron ion binding,GO:0016705~oxidoreductase activity, acting on paired donors, with incorporation or reduction of molecular oxygen,GO:0019825~oxygen binding,GO:0020037~heme binding,	IPR001128:Cytochrome P450,IPR002401:Cytochrome P450, E-class, group I,				Complete proteome,Heme,Iron,Membrane,Metal-binding,Monooxygenase,Oxidoreductase,Reference proteome,Transmembrane,Transmembrane helix,
AT1G74090	desulfo-glucosinolate sulfotransferase 18(SOT18)	Arabidopsis thaliana		GO:0019761~glucosinolate biosynthetic process,	GO:0005737~cytoplasm,	GO:0008146~sulfotransferase activity,GO:0047364~desulfoglucosinolate sulfotransferase activity,GO:0080066~3-methylthiopropyl-desulfoglucosinolate sulfotransferase activity,GO:0080067~4-methylthiobutyl-desulfoglucosinolate sulfotransferase activity,GO:0080068~5-methylthiopentyl-desulfoglucosinolate sulfotransferase activity,GO:0080069~7-methylthioheptyl-desulfoglucosinolate sulfotransferase activi…	IPR000863:Sulfotransferase domain,IPR027417:P-loop containing nucleoside triphosphate hydrolase,				Acetylation,Complete proteome,Cytoplasm,Reference proteome,Transferase,	chain:Sulfotransferase 18,compositionally biased region:Poly-Glu,compositionally biased region:Poly-Thr,mutagenesis site,sequence conflict,sequence variant,
AT3G55150	exocyst subunit exo70 family protein H1(EXO70H1)	Arabidopsis thaliana		GO:0006887~exocytosis,GO:0006904~vesicle docking involved in exocytosis,	GO:0000145~exocyst,GO:0005634~nucleus,GO:0005829~cytosol,		IPR004140:Exocyst complex protein Exo70,IPR016159:Cullin repeat-like-containing domain,				Complete proteome,Reference proteome,
AT3G56700	fatty acid reductase 6(FAR6)	Arabidopsis thaliana		GO:0006629~lipid metabolic process,GO:0009611~response to wounding,GO:0010345~suberin biosynthetic process,GO:0035336~long-chain fatty-acyl-CoA metabolic process,	GO:0009507~chloroplast,	GO:0080019~fatty-acyl-CoA reductase (alcohol-forming) activity,	IPR013120:Male sterility, NAD-binding,IPR016040:NAD(P)-binding domain,IPR026055:Fatty acyl-CoA reductase,	ath00073:Cutin, suberine and wax biosynthesis,ath04146:Peroxisome,			Alternative splicing,Chloroplast,Complete proteome,Lipid biosynthesis,Lipid metabolism,NADP,Oxidoreductase,Plastid,Reference proteome,Transit peptide,	chain:Fatty acyl-CoA reductase 6, chloroplastic,splice variant,transit peptide:Chloroplast,
AT4G24500	hydroxyproline-rich glycoprotein family protein(SIC)	Arabidopsis thaliana		GO:0000380~alternative mRNA splicing, via spliceosome,GO:0000381~regulation of alternative mRNA splicing, via spliceosome,GO:0000398~mRNA splicing, via spliceosome,GO:0007623~circadian rhythm,GO:0009409~response to cold,GO:0009649~entrainment of circadian clock,GO:0009651~response to salt stress,GO:0035196~production of miRNAs involved in gene silencing by miRNA,GO:1901703~protein localization in…	GO:0005634~nucleus,GO:0005829~cytosol,GO:0005886~plasma membrane,GO:0016604~nuclear body,	GO:0005515~protein binding,					Complete proteome,Reference proteome,
AT5G55880	hypothetical protein (DUF295)(AT5G55880)	Arabidopsis thaliana			GO:0005739~mitochondrion,						Complete proteome,Reference proteome,
AT4G20095	hypothetical protein (DUF626)(AT4G20095)	Arabidopsis thaliana			GO:0005634~nucleus,		IPR006462:Protein of unknown function DUF626, Arabidopsis thaliana,				Complete proteome,Reference proteome,
AT5G63820	hypothetical protein (DUF626)(AT5G63820)	Arabidopsis thaliana			GO:0005634~nucleus,		IPR006462:Protein of unknown function DUF626, Arabidopsis thaliana,				Complete proteome,Reference proteome,	chain:UPF0725 protein At5g63820,
AT1G04470	hypothetical protein (DUF810)(AT1G04470)	Arabidopsis thaliana					IPR008528:Protein of unknown function DUF810,IPR014770:Munc13 homology 1,IPR014772:Mammalian uncoordinated homology 13, domain 2,				Coiled coil,Complete proteome,Reference proteome,
AT3G15280	hypothetical protein(AT3G15280)	Arabidopsis thaliana									Complete proteome,Reference proteome,
AT3G19660	hypothetical protein(AT3G19660)	Arabidopsis thaliana			GO:0005739~mitochondrion,
AT3G28750	hypothetical protein(AT3G28750)	Arabidopsis thaliana			GO:0009507~chloroplast,						Complete proteome,Reference proteome,Signal,
AT3G49540	hypothetical protein(AT3G49540)	Arabidopsis thaliana			GO:0005634~nucleus,						Complete proteome,Reference proteome,
AT4G03740	hypothetical protein(AT4G03740)	Arabidopsis thaliana			GO:0005739~mitochondrion,						Complete proteome,Reference proteome,
AT4G19690	iron-regulated transporter 1(IRT1)	Arabidopsis thaliana		GO:0006826~iron ion transport,GO:0006828~manganese ion transport,GO:0006829~zinc II ion transport,GO:0006879~cellular iron ion homeostasis,GO:0009617~response to bacterium,GO:0015675~nickel cation transport,GO:0015691~cadmium ion transport,GO:0030001~metal ion transport,GO:0055072~iron ion homeostasis,GO:0071281~cellular response to iron ion,GO:0071369~cellular response to ethylene stimulus,GO:00…	GO:0005768~endosome,GO:0005769~early endosome,GO:0005802~trans-Golgi network,GO:0005886~plasma membrane,GO:0016021~integral component of membrane,	GO:0005381~iron ion transmembrane transporter activity,GO:0005384~manganese ion transmembrane transporter activity,GO:0005385~zinc ion transmembrane transporter activity,GO:0015086~cadmium ion transmembrane transporter activity,GO:0015088~copper uptake transmembrane transporter activity,	IPR003689:Zinc/iron permease,IPR004698:Zinc/iron permease, fungal/plant,				Alternative splicing,Cell membrane,Complete proteome,Endosome,Golgi apparatus,Ion transport,Iron,Iron transport,Isopeptide bond,Membrane,Reference proteome,Signal,Transmembrane,Transmembrane helix,Transport,Ubl conjugation,Vacuole,	chain:Fe(2+) transport protein 1,mutagenesis site,region of interest:Heavy metals binding,signal peptide,splice variant,topological domain:Cytoplasmic,topological domain:Extracellular,transmembrane region,
AT1G19640	jasmonic acid carboxyl methyltransferase(JMT)	Arabidopsis thaliana		GO:0006633~fatty acid biosynthetic process,GO:0009611~response to wounding,GO:0009694~jasmonic acid metabolic process,GO:0009695~jasmonic acid biosynthetic process,GO:0009867~jasmonic acid mediated signaling pathway,GO:0031408~oxylipin biosynthetic process,GO:0032259~methylation,	GO:0005634~nucleus,GO:0005737~cytoplasm,	GO:0030795~jasmonate O-methyltransferase activity,	IPR005299:SAM dependent carboxyl methyltransferase,	ath00592:alpha-Linolenic acid metabolism,ath01110:Biosynthesis of secondary metabolites,			Complete proteome,Cytoplasm,Fatty acid biosynthesis,Fatty acid metabolism,Lipid biosynthesis,Lipid metabolism,Methyltransferase,Nucleus,Oxylipin biosynthesis,Reference proteome,S-adenosyl-L-methionine,Transferase,	chain:Jasmonate O-methyltransferase,sequence conflict,
AT2G39370	membrane-associated kinase regulator(MAKR4)	Arabidopsis thaliana		GO:0009741~response to brassinosteroid,	GO:0005634~nucleus,GO:0005829~cytosol,GO:0005886~plasma membrane,GO:0009506~plasmodesma,	GO:0004860~protein kinase inhibitor activity,					Cell membrane,Complete proteome,Membrane,Reference proteome,
AT3G18100	myb domain protein 4r1(MYB4R1)	Arabidopsis thaliana		GO:0006355~regulation of transcription, DNA-templated,GO:0006357~regulation of transcription from RNA polymerase II promoter,GO:0030154~cell differentiation,GO:0042795~snRNA transcription from RNA polymerase II promoter,GO:0042796~snRNA transcription from RNA polymerase III promoter,	GO:0005634~nucleus,GO:0019185~snRNA-activating protein complex,	GO:0000981~RNA polymerase II transcription factor activity, sequence-specific DNA binding,GO:0001135~transcription factor activity, RNA polymerase II transcription factor recruiting,GO:0003677~DNA binding,GO:0003700~transcription factor activity, sequence-specific DNA binding,GO:0043565~sequence-specific DNA binding,GO:0044212~transcription regulatory region DNA binding,	IPR001005:SANT/Myb domain,IPR009057:Homeodomain-like,IPR017877:Myb-like domain,IPR017930:Myb domain,			SM00717:SANT,	Complete proteome,Reference proteome,
AT1G08090	nitrate transporter 2:1(NRT2:1)	Arabidopsis thaliana		GO:0010167~response to nitrate,GO:0015706~nitrate transport,GO:0042128~nitrate assimilation,GO:0048527~lateral root development,GO:0055085~transmembrane transport,	GO:0005886~plasma membrane,GO:0016020~membrane,GO:0016021~integral component of membrane,	GO:0015112~nitrate transmembrane transporter activity,	IPR011701:Major facilitator superfamily,IPR020846:Major facilitator superfamily domain,	ath00910:Nitrogen metabolism,			Cell membrane,Complete proteome,Membrane,Nitrate assimilation,Phosphoprotein,Reference proteome,Transmembrane,Transmembrane helix,
AT3G57780	nucleolar-like protein(AT3G57780)	Arabidopsis thaliana		GO:0000059~protein import into nucleus, docking,GO:0006999~nuclear pore organization,	GO:0005634~nucleus,GO:0044611~nuclear pore inner ring,	GO:0017056~structural constituent of nuclear pore,					Coiled coil,Complete proteome,Reference proteome,
AT1G02790	polygalacturonase 4(PGA4)	Arabidopsis thaliana		GO:0005975~carbohydrate metabolic process,GO:0071555~cell wall organization,	GO:0005576~extracellular region,GO:0005618~cell wall,	GO:0004650~polygalacturonase activity,GO:0047911~galacturan 1,4-alpha-galacturonidase activity,	IPR000743:Glycoside hydrolase, family 28,IPR006626:Parallel beta-helix repeat,IPR011050:Pectin lyase fold/virulence factor,IPR012334:Pectin lyase fold,	ath00040:Pentose and glucuronate interconversions,ath01100:Metabolic pathways,		SM00710:PbH1,	Cell wall,Cell wall biogenesis/degradation,Complete proteome,Glycoprotein,Glycosidase,Hydrolase,Reference proteome,Repeat,Secreted,Signal,	active site:Proton donor,chain:Exopolygalacturonase clone GBGE184,glycosylation site:N-linked (GlcNAc...),signal peptide,
AT1G65800	receptor kinase 2(RK2)	Arabidopsis thaliana		GO:0006468~protein phosphorylation,GO:0006952~defense response,GO:0034613~cellular protein localization,GO:0046777~protein autophosphorylation,GO:0048544~recognition of pollen,	GO:0005829~cytosol,GO:0005886~plasma membrane,GO:0009506~plasmodesma,GO:0016021~integral component of membrane,	GO:0004672~protein kinase activity,GO:0004674~protein serine/threonine kinase activity,GO:0004675~transmembrane receptor protein serine/threonine kinase activity,GO:0005524~ATP binding,GO:0016301~kinase activity,GO:0030246~carbohydrate binding,GO:0031625~ubiquitin protein ligase binding,	IPR000719:Protein kinase, catalytic domain,IPR000858:S-locus glycoprotein,IPR001245:Serine-threonine/tyrosine-protein kinase catalytic domain,IPR001480:Bulb-type lectin domain,IPR003609:Apple-like,IPR008271:Serine/threonine-protein kinase, active site,IPR011009:Protein kinase-like domain,IPR013320:Concanavalin A-like lectin/glucanase, subgroup,IPR017441:Protein kinase, ATP binding site,IPR021820:…		PIRSF000641:receptor kinase, S-locus SRK type,	SM00108:B_lectin,SM00220:S_TKc,SM00473:PAN_AP,	ATP-binding,Cell membrane,Complete proteome,Disulfide bond,EGF-like domain,Glycoprotein,Kinase,Lectin,Membrane,Nucleotide-binding,Phosphoprotein,Reference proteome,Serine/threonine-protein kinase,Signal,Transferase,Transmembrane,Transmembrane helix,	chain:Armadillo repeat-containing kinesin-like protein 2,domain:Kinesin-motor,nucleotide phosphate-binding region:ATP,repeat:ARM 1,repeat:ARM 2,repeat:ARM 3,repeat:ARM 4,
AT2G15080	receptor like protein 19(RLP19)	Arabidopsis thaliana	Function unknown,	GO:0006952~defense response,GO:0007165~signal transduction,	GO:0005576~extracellular region,GO:0016021~integral component of membrane,	GO:0016301~kinase activity,	IPR001611:Leucine-rich repeat,IPR003591:Leucine-rich repeat, typical subtype,IPR013210:Leucine-rich repeat-containing N-terminal, type 2,			SM00369:LRR_TYP,	Complete proteome,Leucine-rich repeat,Membrane,Receptor,Reference proteome,Repeat,Signal,Transmembrane,Transmembrane helix,
AT5G61820	stress up-regulated Nod 19 protein(AT5G61820)	Arabidopsis thaliana			GO:0005773~vacuole,GO:0009507~chloroplast,GO:0016021~integral component of membrane,		IPR011692:Stress up-regulated Nod 19,				Complete proteome,Membrane,Reference proteome,Signal,Transmembrane,Transmembrane helix,
AT5G46220	transmembrane protein (DUF616)(AT5G46220)	Arabidopsis thaliana		GO:0009860~pollen tube growth,GO:0010118~stomatal movement,GO:1902456~regulation of stomatal opening,	GO:0005794~Golgi apparatus,GO:0009507~chloroplast,GO:0016021~integral component of membrane,GO:0090406~pollen tube,	GO:0016757~transferase activity, transferring glycosyl groups,GO:0071633~dihydroceramidase activity,	IPR006852:Protein of unknown function DUF616,				Complete proteome,Membrane,Reference proteome,Transmembrane,Transmembrane helix,
AT1G16950	transmembrane protein(AT1G16950)	Arabidopsis thaliana									Complete proteome,Reference proteome,Signal,
AT5G57830	zein-binding protein (Protein of unknown function, DUF593)(AT5G57830)	Arabidopsis thaliana			GO:0005634~nucleus,		IPR007656:Zein-binding domain,				Complete proteome,Reference proteome,
AT5G57820	zinc ion binding protein(AT5G57820)	Arabidopsis thaliana			GO:0005634~nucleus,	GO:0008270~zinc ion binding,	IPR001841:Zinc finger, RING-type,				Complete proteome,Reference proteome,

## Sheet: Clustering-improtant
Annotation Cluster 1	Enrichment Score: 2.159791032969717
Category	Term	Count	%	PValue	Genes	List Total	Pop Hits	Pop Total	Fold Enrichment	Bonferroni	Benjamini	FDR
GOTERM_MF_DIRECT	GO:0080044~quercetin 7-O-glucosyltransferase activity	4	6.34921	0.00158578	AT2G36780, AT4G34131, AT5G49690, AT2G36770	41	105	18171	16.8836	0.128964	0.0728169	0.0728169
GOTERM_MF_DIRECT	GO:0080043~quercetin 3-O-glucosyltransferase activity	4	6.34921	0.00167395	AT2G36780, AT4G34131, AT5G49690, AT2G36770	41	107	18171	16.568	0.135631	0.0728169	0.0728169
GOTERM_BP_DIRECT	GO:0052696~flavonoid glucuronidation	4	6.34921	0.00194788	AT2G36780, AT4G34131, AT5G49690, AT2G36770	42	112	18499	15.7304	0.180349	0.0993417	0.0983677
INTERPRO	IPR002213:UDP-glucuronosyl/UDP-glucosyltransferase	4	6.34921	0.00230616	AT2G36780, AT4G34131, AT5G49690, AT2G36770	51	116	22105	14.9459	0.211647	0.0593837	0.0570776
GOTERM_BP_DIRECT	GO:0009813~flavonoid biosynthetic process	4	6.34921	0.0040436	AT2G36780, AT4G34131, AT5G49690, AT2G36770	42	145	18499	12.1504	0.338525	0.137482	0.136134
GOTERM_MF_DIRECT	GO:0016758~transferase activity, transferring hexosyl groups	4	6.34921	0.00558314	AT2G36780, AT4G34131, AT5G49690, AT2G36770	41	164	18171	10.8096	0.385591	0.161911	0.161911
GOTERM_CC_DIRECT	GO:0043231~intracellular membrane-bounded organelle	4	6.34921	0.00787861	AT2G36780, AT4G34131, AT5G49690, AT2G36770	56	186	25147	9.65707	0.217455	0.09272	0.0897291
COG_ONTOLOGY	Carbohydrate transport and metabolism / Signal transduction mechanisms	3	4.7619	0.0148486	AT2G36780, AT4G34131, AT5G49690	9	63	2589	13.6984	0.0438877	0.0296972	0.0296972
GOTERM_MF_DIRECT	GO:0008194~UDP-glycosyltransferase activity	3	4.7619	0.0208013	AT2G36780, AT4G34131, AT2G36770	41	101	18171	13.1642	0.839394	0.219412	0.219412
GOTERM_MF_DIRECT	GO:0016757~transferase activity, transferring glycosyl groups	5	7.93651	0.0235415	AT2G33100, AT5G46220, AT2G36780, AT5G49690, AT2G36770	41	499	18171	4.44083	0.874142	0.219412	0.219412
UP_KEYWORDS	Glycosyltransferase	5	7.93651	0.0267251	AT2G33100, AT2G36780, AT4G34131, AT5G49690, AT2G36770	62	493	26542	4.34175	0.868882	0.386268	0.365667
GOTERM_BP_DIRECT	GO:0008152~metabolic process	4	6.34921	0.0293389	AT2G36780, AT4G34131, AT5G49690, AT2G36770	42	303	18499	5.81455	0.952038	0.498761	0.493871
Annotation Cluster 2	Enrichment Score: 2.064954753414884
Category	Term	Count	%	PValue	Genes	List Total	Pop Hits	Pop Total	Fold Enrichment	Bonferroni	Benjamini	FDR
INTERPRO	IPR011050:Pectin lyase fold/virulence factor	6	9.52381	2.61004e-05	AT1G14420, AT5G49180, AT2G47040, AT1G02790, AT3G62170, AT3G07820	51	155	22105	16.778	0.00268477	0.00134417	0.00129197
INTERPRO	IPR012334:Pectin lyase fold	6	9.52381	2.61004e-05	AT1G14420, AT5G49180, AT2G47040, AT1G02790, AT3G62170, AT3G07820	51	155	22105	16.778	0.00268477	0.00134417	0.00129197
GOTERM_CC_DIRECT	GO:0090406~pollen tube	4	6.34921	0.000239616	AT5G46220, AT2G47040, AT3G62170, AT4G30140	56	55	25147	32.6584	0.00740147	0.0074281	0.00718849
INTERPRO	IPR018040:Pectinesterase, active site	3	4.7619	0.000749618	AT5G49180, AT2G47040, AT3G62170	51	18	22105	72.2386	0.0743319	0.0257369	0.0247374
UP_KEYWORDS	Signal	19	30.1587	0.00123201	AT5G19880, AT1G14420, AT5G22430, AT4G19690, AT4G33710, AT3G28750, AT4G16190, AT1G16950, AT3G07820, AT2G15080, AT5G49180, AT5G61820, AT3G13400, AT2G47040, AT1G02790, AT3G62170, AT1G65800, AT4G15350, AT4G30140	62	3697	26542	2.20012	0.0883121	0.0924006	0.0874725
GOTERM_BP_DIRECT	GO:0045490~pectin catabolic process	4	6.34921	0.00128937	AT1G14420, AT5G49180, AT2G47040, AT3G62170	42	97	18499	18.163	0.123309	0.0993417	0.0983677
UP_KEYWORDS	Cell wall biogenesis/degradation	6	9.52381	0.002592	AT2G33100, AT5G49180, AT2G47040, AT1G02790, AT3G62170, AT3G07820	62	413	26542	6.21932	0.176879	0.0971999	0.0920159
UP_SEQ_FEATURE	site:Transition state stabilizer	4	6.34921	0.00457539	AT5G19880, AT5G49180, AT2G47040, AT3G62170	20	162	8938	11.0346	0.250921	0.28333	0.28333
UP_SEQ_FEATURE	signal peptide	9	14.2857	0.00885405	AT5G19880, AT1G14420, AT5G49180, AT4G19690, AT4G33710, AT2G47040, AT1G02790, AT3G62170, AT4G30140	20	1520	8938	2.64612	0.428956	0.28333	0.28333
INTERPRO	IPR000070:Pectinesterase, catalytic	3	4.7619	0.00952381	AT5G49180, AT2G47040, AT3G62170	51	65	22105	20.0045	0.626805	0.196191	0.188571
GOTERM_MF_DIRECT	GO:0045330~aspartyl esterase activity	3	4.7619	0.00954469	AT5G49180, AT2G47040, AT3G62170	41	67	18171	19.8446	0.565855	0.174457	0.174457
UP_KEYWORDS	Aspartyl esterase	3	4.7619	0.00984723	AT5G49180, AT2G47040, AT3G62170	62	65	26542	19.7583	0.523936	0.246181	0.233051
GOTERM_CC_DIRECT	GO:0071944~cell periphery	3	4.7619	0.0111761	AT5G49180, AT2G47040, AT3G62170	56	73	25147	18.4543	0.294191	0.09272	0.0897291
GOTERM_BP_DIRECT	GO:0042545~cell wall modification	3	4.7619	0.0117038	AT5G49180, AT2G47040, AT3G62170	42	74	18499	17.8562	0.699054	0.298446	0.29552
GOTERM_CC_DIRECT	GO:0005576~extracellular region	13	20.6349	0.0119639	AT5G19880, AT1G14420, AT4G33710, AT4G16190, AT3G07820, AT5G49690, AT2G15080, AT5G49180, AT3G13400, AT2G47040, AT1G02790, AT3G62170, AT4G30140	56	2686	25147	2.17338	0.311415	0.09272	0.0897291
KEGG_PATHWAY	ath00040:Pentose and glucuronate interconversions	3	4.7619	0.012774	AT1G14420, AT5G49180, AT1G02790	12	76	4727	15.5493	0.120642	0.06387	0.06387
GOTERM_MF_DIRECT	GO:0030599~pectinesterase activity	3	4.7619	0.0150329	AT5G49180, AT2G47040, AT3G62170	41	85	18171	15.6422	0.732275	0.186838	0.186838
UP_SEQ_FEATURE	glycosylation site:N-linked (GlcNAc...)	7	11.1111	0.0151539	AT5G19880, AT1G14420, AT5G49180, AT2G47040, AT1G02790, AT3G62170, AT4G30140	20	1009	8938	3.1004	0.617874	0.323284	0.323284
SMART	SM00856:SM00856	3	4.7619	0.0163784	AT5G49180, AT2G47040, AT3G62170	15	120	8423	14.0383	0.219414	0.245676	0.245676
UP_KEYWORDS	Cell wall	4	6.34921	0.0194874	AT5G49180, AT2G47040, AT1G02790, AT3G62170	62	248	26542	6.90479	0.771446	0.365388	0.345901
GOTERM_MF_DIRECT	GO:0046910~pectinesterase inhibitor activity	3	4.7619	0.0252197	AT5G49180, AT2G47040, AT3G62170	41	112	18171	11.8713	0.891636	0.219412	0.219412
INTERPRO	IPR006501:Pectinesterase inhibitor	3	4.7619	0.0316222	AT5G49180, AT2G47040, AT3G62170	51	123	22105	10.5715	0.963473	0.361899	0.347845
GOTERM_CC_DIRECT	GO:0009505~plant-type cell wall	4	6.34921	0.0386389	AT5G49180, AT3G13400, AT2G47040, AT3G62170	56	341	25147	5.26749	0.70523	0.239561	0.231833
UP_KEYWORDS	Glycoprotein	9	14.2857	0.0442621	AT5G19880, AT1G14420, AT5G49180, AT4G16190, AT2G47040, AT1G02790, AT3G62170, AT1G65800, AT4G30140	62	1735	26542	2.22067	0.966472	0.414957	0.392826
UP_KEYWORDS	Secreted	7	11.1111	0.0704217	AT5G19880, AT5G49180, AT2G47040, AT1G02790, AT3G62170, AT4G30140, AT3G07820	62	1268	26542	2.36331	0.995817	0.480148	0.45454
GOTERM_CC_DIRECT	GO:0005618~cell wall	4	6.34921	0.137544	AT5G49180, AT2G47040, AT1G02790, AT3G62170	56	588	25147	3.05479	0.989818	0.609122	0.589473
UP_KEYWORDS	Hydrolase	7	11.1111	0.500657	AT5G49180, AT4G16190, AT2G47040, AT1G02790, AT3G62170, AT4G30140, AT3G07820	62	2455	26542	1.22064	1	1	0.959459
KEGG_PATHWAY	ath01100:Metabolic pathways	4	6.34921	0.864267	AT5G19880, AT5G49180, AT1G76680, AT1G02790	12	1833	4727	0.859611	1	1	1
Annotation Cluster 3	Enrichment Score: 1.311846103752039
Category	Term	Count	%	PValue	Genes	List Total	Pop Hits	Pop Total	Fold Enrichment	Bonferroni	Benjamini	FDR
GOTERM_MF_DIRECT	GO:0020037~heme binding	5	7.93651	0.0100263	AT3G14690, AT5G19880, AT4G12300, AT4G15350, AT5G25180	41	386	18171	5.74087	0.583841	0.174457	0.174457
GOTERM_MF_DIRECT	GO:0019825~oxygen binding	4	6.34921	0.0146723	AT3G14690, AT4G12300, AT4G15350, AT5G25180	41	234	18171	7.57598	0.723611	0.186838	0.186838
INTERPRO	IPR002401:Cytochrome P450, E-class, group I	4	6.34921	0.0152163	AT3G14690, AT4G12300, AT4G15350, AT5G25180	51	230	22105	7.53794	0.793887	0.223898	0.215203
INTERPRO	IPR001128:Cytochrome P450	4	6.34921	0.0187598	AT3G14690, AT4G12300, AT4G15350, AT5G25180	51	249	22105	6.96275	0.857813	0.241532	0.232153
GOTERM_BP_DIRECT	GO:0055114~oxidation-reduction process	8	12.6984	0.0255033	AT3G14690, AT5G19880, AT4G12300, AT3G13400, AT3G62960, AT1G76680, AT4G15350, AT5G25180	42	1330	18499	2.64934	0.928287	0.498761	0.493871
UP_KEYWORDS	Iron	6	9.52381	0.0309014	AT3G14690, AT5G19880, AT4G19690, AT4G12300, AT1G06640, AT5G25180	62	764	26542	3.36202	0.905028	0.386268	0.365667
GOTERM_MF_DIRECT	GO:0005506~iron ion binding	4	6.34921	0.0374205	AT3G14690, AT4G12300, AT4G15350, AT5G25180	41	336	18171	5.27613	0.963777	0.295962	0.295962
GOTERM_BP_DIRECT	GO:0044550~secondary metabolite biosynthetic process	3	4.7619	0.0409995	AT4G12300, AT4G15350, AT5G25180	42	145	18499	9.11281	0.986019	0.597421	0.591564
GOTERM_MF_DIRECT	GO:0016709~oxidoreductase activity, acting on paired donors, with incorporation or reduction of molecular oxygen, NAD(P)H as one donor, and incorporation of one atom of oxygen	3	4.7619	0.042523	AT4G12300, AT4G15350, AT5G25180	41	149	18171	8.92339	0.977188	0.308292	0.308292
COG_ONTOLOGY	Secondary metabolites biosynthesis, transport, and catabolism	4	6.34921	0.0446929	AT3G14690, AT4G12300, AT4G15350, AT5G25180	9	276	2589	4.16908	0.128176	0.0446929	0.0446929
UP_KEYWORDS	Oxidoreductase	7	11.1111	0.057849	AT3G14690, AT5G19880, AT3G56700, AT4G12300, AT1G06640, AT1G76680, AT5G25180	62	1205	26542	2.48687	0.988544	0.455229	0.43095
UP_KEYWORDS	Heme	4	6.34921	0.0606971	AT3G14690, AT5G19880, AT4G12300, AT5G25180	62	390	26542	4.39074	0.990871	0.455229	0.43095
UP_KEYWORDS	Monooxygenase	3	4.7619	0.137977	AT3G14690, AT4G12300, AT5G25180	62	283	26542	4.53813	0.999985	0.689887	0.653093
GOTERM_CC_DIRECT	GO:0016020~membrane	5	7.93651	0.559861	AT3G62120, AT4G12300, AT1G08090, AT4G15350, AT5G25180	56	1797	25147	1.24945	1	1	1
UP_KEYWORDS	Metal-binding	6	9.52381	0.802519	AT3G14690, AT5G19880, AT1G14420, AT4G12300, AT1G06640, AT5G25180	62	2868	26542	0.8956	1	1	0.959459
Annotation Cluster 4	Enrichment Score: 1.0610318181411351
Category	Term	Count	%	PValue	Genes	List Total	Pop Hits	Pop Total	Fold Enrichment	Bonferroni	Benjamini	FDR
GOTERM_BP_DIRECT	GO:0009611~response to wounding	3	4.7619	0.0718412	AT3G56700, AT1G19640, AT1G76680	42	199	18499	6.63999	0.999502	0.73278	0.725596
UP_KEYWORDS	Lipid biosynthesis	3	4.7619	0.0946221	AT3G56700, AT1G19640, AT1G76680	62	225	26542	5.70796	0.999422	0.537223	0.508571
UP_KEYWORDS	Lipid metabolism	4	6.34921	0.0965025	AT3G56700, AT1G19640, AT1G76680, AT4G30140	62	476	26542	3.59745	0.999505	0.537223	0.508571
Annotation Cluster 5	Enrichment Score: 0.18771339473945667
Category	Term	Count	%	PValue	Genes	List Total	Pop Hits	Pop Total	Fold Enrichment	Bonferroni	Benjamini	FDR
GOTERM_MF_DIRECT	GO:0016301~kinase activity	4	6.34921	0.402832	AT3G57710, AT2G15080, AT1G03920, AT1G65800	41	1039	18171	1.70624	1	1	1
GOTERM_MF_DIRECT	GO:0004674~protein serine/threonine kinase activity	3	4.7619	0.533635	AT3G57710, AT1G03920, AT1G65800	41	804	18171	1.65371	1	1	1
INTERPRO	IPR000719:Protein kinase, catalytic domain	3	4.7619	0.679795	AT3G57710, AT1G03920, AT1G65800	51	1023	22105	1.27106	1	1	0.970588
INTERPRO	IPR011009:Protein kinase-like domain	3	4.7619	0.702355	AT3G57710, AT1G03920, AT1G65800	51	1067	22105	1.21864	1	1	0.970588
UP_KEYWORDS	Kinase	3	4.7619	0.801507	AT3G57710, AT1G03920, AT1G65800	62	1285	26542	0.999448	1	1	0.959459
GOTERM_MF_DIRECT	GO:0005524~ATP binding	4	6.34921	0.908886	AT3G57710, AT1G03920, AT3G62120, AT1G65800	41	2372	18171	0.747378	1	1	1
Annotation Cluster 6	Enrichment Score: 0.08277808653979245
Category	Term	Count	%	PValue	Genes	List Total	Pop Hits	Pop Total	Fold Enrichment	Bonferroni	Benjamini	FDR
GOTERM_CC_DIRECT	GO:0016021~integral component of membrane	11	17.4603	0.7803	AT3G14690, AT2G33100, AT2G15080, AT5G46220, AT5G61820, AT5G49180, AT4G19690, AT4G12300, AT1G08090, AT1G65800, AT5G25180	56	5439	25147	0.90818	1	1	1
UP_KEYWORDS	Transmembrane helix	11	17.4603	0.840727	AT3G14690, AT2G33100, AT2G15080, AT5G46220, AT5G61820, AT5G49180, AT4G19690, AT4G12300, AT1G08090, AT1G65800, AT5G25180	62	5505	26542	0.855416	1	1	0.959459
UP_KEYWORDS	Membrane	13	20.6349	0.840812	AT2G33100, AT5G46220, AT4G19690, AT1G08090, AT5G25180, AT3G14690, AT2G15080, AT5G49180, AT5G61820, AT2G39370, AT4G12300, AT2G47040, AT1G65800	62	6456	26542	0.862029	1	1	0.959459
UP_KEYWORDS	Transmembrane	11	17.4603	0.845808	AT3G14690, AT2G33100, AT2G15080, AT5G46220, AT5G61820, AT5G49180, AT4G19690, AT4G12300, AT1G08090, AT1G65800, AT5G25180	62	5535	26542	0.850779	1	1	0.959459
Annotation Cluster 7	Enrichment Score: 0.02728264336531094
Category	Term	Count	%	PValue	Genes	List Total	Pop Hits	Pop Total	Fold Enrichment	Bonferroni	Benjamini	FDR
GOTERM_MF_DIRECT	GO:0005524~ATP binding	4	6.34921	0.908886	AT3G57710, AT1G03920, AT3G62120, AT1G65800	41	2372	18171	0.747378	1	1	1
UP_KEYWORDS	ATP-binding	3	4.7619	0.941067	AT1G03920, AT3G62120, AT1G65800	62	1919	26542	0.66925	1	1	0.959459
UP_KEYWORDS	Nucleotide-binding	3	4.7619	0.968327	AT1G03920, AT3G62120, AT1G65800	62	2221	26542	0.578249	1	1	0.968327

## Sheet: gprofiler
source	term_name	term_id	adjusted_p_value	negative_log10_of_adjusted_p_value	term_size	query_size	intersection_size	effective_domain_size	intersections
GO:MF	UDP-glucosyltransferase activity	GO:0035251	0.0158428	1.80017	176	49	5	21360	AT2G33100,AT2G36770,AT2G36780,AT4G34131,AT5G49690
GO:MF	quercetin 7-O-glucosyltransferase activity	GO:0080044	0.0273406	1.56319	102	49	4	21360	AT2G36770,AT2G36780,AT4G34131,AT5G49690
GO:MF	quercetin 3-O-glucosyltransferase activity	GO:0080043	0.0329239	1.48249	107	49	4	21360	AT2G36770,AT2G36780,AT4G34131,AT5G49690
GO:MF	glucosyltransferase activity	GO:0046527	0.0483141	1.31593	223	49	5	21360	AT2G33100,AT2G36770,AT2G36780,AT4G34131,AT5G49690
GO:BP	pectin catabolic process	GO:0045490	0.0476493	1.32194	101	50	4	23475	AT1G14420,AT2G47040,AT3G62170,AT5G49180
GO:CC	pollen tube	GO:0090406	0.00394425	2.40404	84	46	4	21345	AT2G47040,AT3G62170,AT4G30140,AT5G46220
GO:CC	plasma membrane bounded cell projection	GO:0120025	0.0105495	1.97677	108	46	4	21345	AT2G47040,AT3G62170,AT4G30140,AT5G46220
GO:CC	cell projection	GO:0042995	0.0203507	1.69142	128	46	4	21345	AT2G47040,AT3G62170,AT4G30140,AT5G46220
KEGG	alpha-Linolenic acid metabolism	KEGG:00592	0.0129409	1.88804	43	19	3	4971	AT1G19640,AT1G76680,AT3G03480
KEGG	Pentose and glucuronate interconversions	KEGG:00040	0.0149523	1.82529	107	19	4	4971	AT1G02790,AT1G14420,AT3G07820,AT5G49180
